# Supplementary material for: The reaction of acetonitrile with hydrogen peroxide in alkaline medium: a DFT mechanistic study of green production of amides
Source: Royal Society of Chemistry journal article supplement (doi:10.1039/d3cp02024j), 2023-01-01
Supplement: d3cp02024j1.pdf [file d3cp02024j1.pdf]

This copy of the ESI replaces the previous version published on 26.06.2023 to correct some errors in the calculations and the optimized geometries

## ELECTRONIC SUPPLEMENTARY INFORMATION

### Correction: The Reaction of Acetonitrile with Hydrogen Peroxide in Alkaline Medium: a DFT Mechanistic Study of Green Production of Amides.

Girolamo Casella\*, Silvia Carlotto, Ana P.C. Ribeiro, and Luísa M.D.R.S. Martins

#### OPTIMIZED COORDINATES

##### M06L/6-311+G(d,p)

###### ACN

6

|   |          |           |           |
|---|----------|-----------|-----------|
| C | 1.267096 | 0.457142  | -0.007299 |
| C | 2.087703 | -0.722182 | 0.017785  |
| N | 0.603688 | 1.410263  | -0.027466 |
| H | 2.903178 | -0.626188 | -0.700625 |
| H | 2.509739 | -0.863915 | 1.013787  |
| H | 1.491665 | -1.598738 | -0.240390 |

###### H<sub>2</sub>O<sub>2</sub>

4

|   |           |           |           |
|---|-----------|-----------|-----------|
| O | -2.129018 | 0.348978  | 0.103132  |
| O | -1.462253 | -0.908325 | -0.155535 |
| H | -1.243196 | -1.203756 | 0.741088  |
| H | -1.415256 | 0.986221  | -0.050700 |

###### HOO<sup>-</sup>

3

|   |           |           |           |
|---|-----------|-----------|-----------|
| O | -2.104031 | 0.376574  | 0.068278  |
| O | -1.491880 | -0.978838 | -0.149258 |
| H | -1.215917 | -1.218808 | 0.742810  |

###### HO<sup>-</sup>

2

|   |          |          |           |
|---|----------|----------|-----------|
| O | 0.000000 | 0.000000 | -0.006607 |
| H | 0.000000 | 0.000000 | 0.953607  |

###### TS1

8

|   |           |           |           |
|---|-----------|-----------|-----------|
| C | 1.266687  | -0.544687 | -0.000043 |
| C | 0.100788  | 0.366041  | -0.000019 |
| N | -0.195913 | 1.531747  | -0.000023 |
| O | -1.198262 | -0.875571 | 0.000060  |
| H | 1.260015  | -1.194631 | -0.877907 |
| H | 2.193670  | 0.031922  | -0.000192 |
| H | 1.260186  | -1.194434 | 0.877968  |
| H | -1.961233 | -0.288641 | 0.000187  |

###### TS2

8

|   |           |           |           |
|---|-----------|-----------|-----------|
| C | -1.058617 | -0.835045 | -0.000044 |
| C | -0.165577 | 0.350705  | -0.000075 |
| N | -0.214729 | 1.554927  | 0.000104  |
| H | -0.886626 | -1.461062 | 0.879440  |
| H | -2.104493 | -0.521203 | -0.000599 |
| H | -0.885847 | -1.461889 | -0.878821 |
| O | 1.427703  | -0.397547 | -0.000181 |
| H | 1.303615  | -1.353916 | 0.001410  |
| H | -1.844656 | 0.482998  | -0.000839 |

###### INT1

8

|   |           |           |           |
|---|-----------|-----------|-----------|
| C | 0.979058  | -1.042550 | -0.000022 |
| C | 0.282276  | 0.293381  | -0.000072 |
| N | 0.708797  | 1.460844  | -0.000109 |
| O | -1.166675 | -0.048082 | 0.000263  |
| H | 0.706235  | -1.639857 | -0.876458 |
| H | 2.061100  | -0.909831 | -0.000155 |
| H | 0.706451  | -1.639767 | 0.876544  |
| H | -1.596069 | 0.817680  | 0.000247  |

###### INT2

8

|   |           |           |           |
|---|-----------|-----------|-----------|
| C | 1.059675  | -1.023853 | -0.000038 |
| C | 0.290891  | 0.273997  | -0.000031 |
| O | -1.173543 | -0.079830 | 0.000092  |
| N | 0.650223  | 1.459296  | -0.000068 |
| H | 0.818943  | -1.634240 | -0.877697 |
| H | 2.133740  | -0.836841 | -0.000131 |
| H | 0.819074  | -1.634178 | 0.877699  |
| H | -1.267324 | -1.041185 | 0.000104  |

###### TS3

8

|   |           |           |           |
|---|-----------|-----------|-----------|
| C | -1.424296 | 0.004343  | 0.000000  |
| C | 0.061923  | 0.131202  | -0.000017 |
| N | 0.841269  | 1.140479  | 0.000008  |
| O | 0.773478  | -1.066883 | 0.000001  |
| H | -1.767731 | -0.552527 | 0.877168  |
| H | -1.908956 | 0.980586  | -0.000662 |
| H | -1.767695 | -0.553668 | -0.876455 |
| H | 1.541916  | -0.135958 | -0.000010 |

###### cis-EtIm<sup>-</sup>

8

|   |           |           |           |
|---|-----------|-----------|-----------|
| C | -0.059741 | 0.137717  | 0.000052  |
| C | 1.437853  | -0.070116 | 0.001136  |
| N | 1.864878  | -1.314325 | 0.001997  |
| O | 2.159337  | 0.995253  | 0.000905  |
| H | -0.618522 | -0.799363 | 0.000161  |
| H | -0.359066 | 0.721023  | 0.876013  |
| H | -0.357969 | 0.720181  | -0.876857 |
| H | 2.888279  | -1.272003 | 0.002384  |

**trans-syn-Etlm**

9

|   |           |           |           |
|---|-----------|-----------|-----------|
| C | -0.079183 | 0.145054  | 0.000026  |
| C | 1.370010  | -0.180977 | 0.000753  |
| O | 1.575333  | -1.523968 | 0.001486  |
| N | 2.371966  | 0.611810  | 0.000387  |
| H | -0.239081 | 1.221673  | -0.000923 |
| H | -0.563514 | -0.288669 | -0.878070 |
| H | -0.564045 | -0.287205 | 0.878551  |
| H | 2.029697  | 1.571238  | -0.000423 |
| H | 2.531799  | -1.677267 | 0.002040  |

**trans-anti-Etlm**

9

|   |           |           |           |
|---|-----------|-----------|-----------|
| C | -0.096293 | 0.158457  | 0.000035  |
| C | 1.349985  | -0.190823 | -0.000061 |
| O | 1.627053  | -1.527142 | 0.000529  |
| N | 2.357597  | 0.593475  | 0.000352  |
| H | -0.241698 | 1.237042  | 0.000024  |
| H | -0.586940 | -0.267577 | -0.879320 |
| H | -0.586887 | -0.267534 | 0.879445  |
| H | 2.014866  | 1.552202  | 0.000570  |
| H | 0.801905  | -2.028473 | 0.000658  |

**OC1**

12

|   |           |           |           |
|---|-----------|-----------|-----------|
| C | -0.829727 | 2.689791  | 0.314677  |
| C | -0.548098 | 1.428483  | 1.044880  |
| O | -0.356918 | 1.647656  | 2.368380  |
| N | -0.477899 | 0.236760  | 0.585589  |
| O | -3.516053 | 0.265077  | 1.952429  |
| O | -2.669669 | -0.961894 | 2.112363  |
| H | -0.650344 | 0.256409  | -0.418006 |
| H | -0.202269 | 0.791230  | 2.795417  |
| H | -1.746951 | 3.142240  | 0.700072  |
| H | -0.024912 | 3.410888  | 0.474590  |
| H | -0.943186 | 2.507926  | -0.752310 |
| H | -1.866356 | -0.709817 | 1.619234  |

**TS4**

12

|   |           |           |           |
|---|-----------|-----------|-----------|
| C | -0.775660 | 1.213357  | -0.817146 |
| C | -0.205924 | 0.261216  | 0.183717  |
| O | 0.626763  | -0.747102 | -0.390719 |
| O | 2.034447  | -0.232533 | -0.311029 |
| N | 0.080529  | 0.533794  | 1.413717  |
| O | -1.682061 | -1.112652 | -0.037649 |
| H | -1.120387 | 0.705255  | -1.716648 |
| H | -1.605692 | 1.774220  | -0.385096 |
| H | 0.000901  | 1.930310  | -1.104761 |
| H | -1.440874 | -1.661197 | 0.715596  |
| H | -0.399486 | 1.392572  | 1.677814  |
| H | 2.058149  | 0.013137  | 0.632821  |

**OC2**

12

|   |           |           |           |
|---|-----------|-----------|-----------|
| C | -0.894297 | 2.656316  | 0.323108  |
| C | -0.571944 | 1.417783  | 1.080247  |
| O | -0.378193 | 1.574334  | 2.417188  |
| N | -0.451911 | 0.225712  | 0.633870  |
| O | -2.772080 | -0.884098 | 2.061015  |
| O | -2.916336 | 0.363728  | 2.877783  |
| H | -0.623424 | 0.239394  | -0.369503 |
| H | -0.518120 | 2.497553  | 2.663671  |
| H | -1.795097 | 3.120307  | 0.734457  |
| H | -0.082848 | 3.382388  | 0.422795  |
| H | -1.054229 | 2.441868  | -0.732034 |
| H | -1.927389 | -0.664133 | 1.625404  |

**TS5**

12

|   |           |           |           |
|---|-----------|-----------|-----------|
| C | -0.733007 | 1.070930  | -0.975532 |
| C | -0.201814 | 0.274422  | 0.174741  |
| N | 0.080024  | 0.740908  | 1.346570  |
| O | 0.621339  | -0.825451 | -0.221923 |
| O | 2.018447  | -0.288632 | -0.311132 |
| O | -1.670187 | -1.081530 | 0.259094  |
| H | -1.067378 | 0.441783  | -1.800305 |
| H | -1.561983 | 1.704166  | -0.655904 |
| H | 0.060323  | 1.726698  | -1.351929 |
| H | -1.855326 | -1.298240 | -0.661097 |
| H | -0.383888 | 1.641168  | 1.456860  |
| H | 2.100222  | 0.090853  | 0.582813  |

**trans-syn-PAIA**

10

|   |           |           |           |
|---|-----------|-----------|-----------|
| C | -1.742018 | -0.648180 | -0.047003 |
| C | -0.481149 | 0.098999  | 0.178947  |
| N | -0.239049 | 1.348248  | 0.236205  |
| O | 0.558036  | -0.772058 | 0.348122  |
| O | 1.802592  | -0.074593 | 0.573280  |
| H | -1.575520 | -1.724648 | -0.057310 |
| H | -1.089199 | 1.887659  | 0.095940  |
| H | 1.491262  | 0.864884  | 0.531091  |
| H | -2.179269 | -0.346995 | -1.000144 |
| H | -2.455235 | -0.408320 | 0.743279  |

**OC3**

10

|   |           |           |           |
|---|-----------|-----------|-----------|
| C | 0.863001  | 0.270552  | -0.137925 |
| C | 1.795800  | -0.695410 | -0.643422 |
| N | 0.110148  | 1.054162  | 0.270402  |
| O | -2.419548 | -0.029665 | 1.051126  |
| H | 2.314312  | -0.297154 | -1.516551 |
| H | 2.530299  | -0.943677 | 0.124114  |
| H | 1.264005  | -1.604253 | -0.931142 |
| O | -2.036242 | -1.296496 | 0.467479  |
| H | -1.648383 | -1.757757 | 1.226206  |
| H | -1.639400 | 0.523012  | 0.835853  |

**TS6**

10

|   |           |           |           |
|---|-----------|-----------|-----------|
| C | 1.170479  | 0.239360  | 0.006923  |
| C | 1.883093  | -0.989821 | 0.000000  |
| N | 0.878745  | 1.389279  | 0.016893  |
| O | -1.086741 | 0.156746  | -0.030745 |
| H | 1.632729  | -1.560128 | -0.896242 |
| H | 2.957164  | -0.775990 | 0.005497  |
| H | 1.625934  | -1.574692 | 0.884825  |
| O | -2.397805 | -0.444910 | -0.093468 |
| H | -2.627712 | -0.560995 | 0.838827  |
| H | -0.184395 | 1.554927  | 0.001008  |

**OC4**

9

|   |           |           |           |
|---|-----------|-----------|-----------|
| C | -1.123235 | 0.618227  | 0.002644  |
| C | -2.053717 | -0.476083 | -0.002354 |
| N | -0.392467 | 1.522036  | 0.005945  |
| O | 1.394645  | -1.339464 | 0.091898  |
| H | -1.914363 | -1.090790 | 0.888071  |
| H | -3.075686 | -0.092592 | -0.013280 |
| H | -1.897792 | -1.096112 | -0.886360 |
| O | 2.158390  | -0.059934 | -0.046830 |
| H | 1.445928  | 0.598091  | -0.022858 |

**TS7**

9

|   |           |           |           |
|---|-----------|-----------|-----------|
| C | -0.583832 | 0.362351  | -0.000029 |
| C | -1.796015 | -0.473533 | 0.000024  |
| N | -0.161888 | 1.490820  | -0.000001 |
| O | 0.654691  | -0.911890 | -0.000044 |
| H | -1.825954 | -1.119785 | 0.880084  |
| H | -2.688465 | 0.154188  | 0.000078  |
| H | -1.826000 | -1.119707 | -0.880073 |
| O | 1.880125  | -0.144869 | 0.000045  |
| H | 1.474185  | 0.770724  | -0.000070 |

**cis-PAIA**

9

|   |           |           |           |
|---|-----------|-----------|-----------|
| C | 2.421041  | -0.337901 | 0.000061  |
| C | 1.007806  | 0.130510  | 0.000165  |
| O | 0.168315  | -0.931271 | 0.000174  |
| O | -1.239833 | -0.553721 | 0.000243  |
| N | 0.657609  | 1.362314  | 0.000211  |
| H | 2.626491  | -0.952506 | -0.879564 |
| H | 3.099566  | 0.513410  | 0.000154  |
| H | 2.626554  | -0.952757 | 0.879494  |
| H | -0.368041 | 1.358540  | 0.000254  |

**OC5**

19

|   |           |           |           |
|---|-----------|-----------|-----------|
| C | -1.983663 | 0.174435  | -1.347742 |
| C | -2.925992 | -0.268325 | -0.284123 |
| O | -4.203977 | -0.030342 | -0.677158 |
| O | -5.190586 | -0.552570 | 0.256178  |
| N | -2.565528 | -0.820815 | 0.811372  |
| O | -5.056099 | -3.034414 | -0.473605 |
| O | -4.271551 | -2.849232 | -1.672573 |
| C | -5.003357 | -2.432501 | -2.748532 |
| C | -4.056389 | -2.163133 | -3.867439 |
| N | -6.268751 | -2.287976 | -2.704419 |
| H | -1.000279 | 0.372859  | -0.923712 |
| H | -1.878389 | -0.615147 | -2.097452 |
| H | -2.344773 | 1.068548  | -1.858205 |
| H | -3.427173 | -1.051110 | 1.316064  |
| H | -5.150221 | -2.060391 | -0.145135 |
| H | -4.547200 | -2.335445 | -4.824884 |
| H | -3.742535 | -1.116563 | -3.824014 |
| H | -3.161951 | -2.783598 | -3.801592 |
| H | -6.572187 | -1.973865 | -3.625528 |

**TS8**

11

|   |           |           |           |
|---|-----------|-----------|-----------|
| C | -2.202328 | -0.751403 | -0.355789 |
| C | -1.105272 | 0.147659  | 0.119654  |
| O | -1.129745 | 1.373877  | -0.022101 |
| N | -0.050024 | -0.442523 | 0.768516  |
| H | 1.278953  | 0.387875  | 0.760878  |
| H | 0.061032  | -1.425478 | 0.505491  |
| H | -3.123578 | -0.187342 | -0.493516 |
| H | -2.374943 | -1.581675 | 0.331339  |
| H | -1.900809 | -1.183157 | -1.315205 |
| O | 1.688880  | 0.353269  | -0.197885 |
| O | 2.722754  | -0.388408 | -0.248987 |

**AcAm + <sup>1</sup>O<sub>2</sub>**

11

|   |           |           |           |
|---|-----------|-----------|-----------|
| C | -2.038983 | -0.373403 | -0.444202 |
| C | -0.594329 | -0.371460 | -0.065723 |
| O | 0.152244  | 0.540510  | -0.487515 |
| N | -0.146782 | -1.350269 | 0.715939  |
| O | 2.241674  | 0.962419  | 1.477566  |
| H | -0.765095 | -2.075323 | 1.046393  |
| H | -2.497315 | 0.557876  | -0.107680 |
| H | -2.577613 | -1.217612 | -0.015373 |
| H | -2.123391 | -0.405406 | -1.531520 |
| H | 0.831806  | -1.359674 | 0.973903  |
| O | 2.139882  | 0.315613  | 0.430570  |

**OC6**

19

|   |           |           |           |
|---|-----------|-----------|-----------|
| C | 1.773190  | -1.564415 | -1.352601 |
| C | 2.300512  | -0.549046 | -0.410240 |
| O | 3.012155  | 0.395639  | -1.096974 |
| O | 3.541865  | 1.408037  | -0.212779 |
| N | 2.216058  | -0.442912 | 0.856212  |
| O | -0.267049 | 1.493147  | -0.991448 |
| O | -1.017666 | 0.361951  | -0.460689 |
| C | -2.337265 | 0.621041  | -0.322371 |
| C | -3.038127 | -0.568524 | 0.235195  |
| N | -2.916224 | 1.724112  | -0.619963 |
| H | 2.595909  | -2.151821 | -1.766580 |
| H | 1.090707  | -2.232805 | -0.830201 |
| H | 1.250163  | -1.089094 | -2.184115 |
| H | 1.655225  | -1.197684 | 1.241605  |
| H | 3.205055  | 1.079850  | 0.658404  |
| H | -4.109366 | -0.381923 | 0.289516  |
| H | -2.863980 | -1.451710 | -0.383749 |
| H | -2.671151 | -0.800074 | 1.238229  |
| H | -2.171247 | 2.337527  | -0.969347 |

**TS9**

19

|   |           |           |           |
|---|-----------|-----------|-----------|
| C | 1.320627  | 0.466367  | 0.163605  |
| C | 0.613394  | 1.197260  | 1.267941  |
| N | 2.219695  | 0.998537  | -0.655889 |
| O | 1.709908  | -0.784265 | 0.706673  |
| H | 1.325775  | 1.459987  | 2.053229  |
| H | 0.177715  | 2.115283  | 0.872027  |
| H | -0.182356 | 0.595687  | 1.713652  |
| H | 2.038625  | 1.991809  | -0.754381 |
| O | -1.030239 | -0.762513 | -0.330572 |
| C | -2.171517 | -0.030646 | -0.183693 |
| C | -3.223399 | -0.883746 | 0.433411  |
| H | -4.162996 | -0.337243 | 0.491240  |
| H | -3.374755 | -1.797413 | -0.145006 |
| H | -2.925139 | -1.183644 | 1.441172  |
| N | -2.340832 | 1.191884  | -0.511318 |
| H | -1.452070 | 1.530175  | -0.890840 |
| H | 2.959398  | -0.626338 | -0.688323 |
| O | 0.086704  | 0.036243  | -0.917258 |
| O | 2.634768  | -1.436547 | -0.210082 |

**INT4 + cis-Etlm**

19

|   |           |           |           |
|---|-----------|-----------|-----------|
| C | 0.981036  | 1.346441  | 1.376233  |
| C | 1.577609  | 0.668291  | 0.192225  |
| O | 0.970932  | 0.776099  | -1.044139 |
| O | -1.292572 | -1.107776 | 0.087041  |
| C | -2.298247 | -0.308469 | 0.152530  |
| N | -2.318917 | 0.968203  | -0.165189 |
| N | 2.359113  | 1.331786  | -0.794216 |
| O | 1.994329  | -0.604933 | 0.603232  |
| O | 2.515003  | -1.363458 | -0.505962 |
| C | -3.591944 | -0.911922 | 0.650955  |
| H | 1.732332  | 1.482415  | 2.155251  |
| H | 0.601400  | 2.322695  | 1.074126  |
| H | 0.159415  | 0.751096  | 1.777430  |
| H | 2.186515  | 2.336459  | -0.670276 |
| H | -4.415032 | -0.196052 | 0.676055  |
| H | -3.882753 | -1.755096 | 0.017258  |
| H | -3.452181 | -1.315593 | 1.658462  |
| H | -1.370194 | 1.207617  | -0.469950 |
| H | 3.458639  | -1.137318 | -0.479097 |

**INT4**

11

|   |          |           |           |
|---|----------|-----------|-----------|
| C | 0.984207 | 1.346128  | 1.376308  |
| C | 1.573762 | 0.666157  | 0.191557  |
| O | 1.979728 | -0.613063 | 0.594561  |
| O | 2.527688 | -1.356324 | -0.512767 |
| O | 0.959399 | 0.778400  | -1.045270 |
| N | 2.350554 | 1.325306  | -0.798541 |
| H | 1.735454 | 1.471743  | 2.156710  |
| H | 0.615169 | 2.327179  | 1.078335  |
| H | 0.155567 | 0.761228  | 1.776983  |
| H | 2.185042 | 2.331036  | -0.672551 |
| H | 3.469753 | -1.128216 | -0.460518 |

**TS10**

11

|   |           |           |           |
|---|-----------|-----------|-----------|
| C | 1.537447  | -0.964525 | -0.006681 |
| C | 0.335075  | -0.087220 | 0.049302  |
| O | 0.194157  | 0.807967  | 1.046811  |
| N | 0.428485  | 1.185231  | -0.758588 |
| O | -0.788406 | -0.838049 | -0.291370 |
| O | -1.970264 | -0.208860 | 0.053734  |
| H | 1.548977  | -1.522735 | -0.943101 |
| H | 1.499610  | -1.666982 | 0.826362  |
| H | 1.237886  | 1.772186  | -0.562064 |
| H | -0.447130 | 1.706269  | -0.812016 |
| H | 2.442230  | -0.363343 | 0.071810  |

**OPTIMIZED COORDINATES  
M06L/cc-PVTZ****ACN**

6

|   |          |           |           |
|---|----------|-----------|-----------|
| C | 1.267458 | 0.456370  | -0.007295 |
| C | 2.087170 | -0.721548 | 0.017640  |
| N | 0.606444 | 1.406412  | -0.027284 |
| H | 2.900165 | -0.626479 | -0.697732 |
| H | 2.508113 | -0.863045 | 1.009904  |
| H | 1.493719 | -1.595328 | -0.239441 |

**H<sub>2</sub>O<sub>2</sub>**

4

|   |           |           |           |
|---|-----------|-----------|-----------|
| O | -2.132800 | 0.348983  | 0.097110  |
| O | -1.468175 | -0.911893 | -0.157241 |
| H | -1.238060 | -1.190612 | 0.739366  |
| H | -1.410688 | 0.976640  | -0.041249 |

**HOO<sup>-</sup>**

3

|   |           |           |           |
|---|-----------|-----------|-----------|
| O | -2.104302 | 0.378242  | 0.071223  |
| O | -1.489329 | -0.984852 | -0.151136 |
| H | -1.218198 | -1.214462 | 0.741742  |

**HO<sup>-</sup>**

2

|   |          |          |           |
|---|----------|----------|-----------|
| O | 0.000000 | 0.000000 | -0.005390 |
| H | 0.000000 | 0.000000 | 0.952390  |

**TS1**

8

|   |           |           |           |
|---|-----------|-----------|-----------|
| C | -1.208803 | -0.657049 | 0.000062  |
| C | -0.156037 | 0.373661  | 0.000026  |
| N | 0.046750  | 1.549444  | 0.000042  |
| O | 1.292790  | -0.782104 | -0.000112 |
| H | -1.124009 | -1.299538 | 0.873961  |
| H | -2.194335 | -0.195745 | 0.000188  |
| H | -1.124178 | -1.299420 | -0.873941 |
| H | 1.961995  | -0.094246 | -0.000135 |

**TS2**

8

|   |           |           |           |
|---|-----------|-----------|-----------|
| C | 0.750191  | -1.111051 | -0.000107 |
| C | 0.292524  | 0.293744  | 0.000009  |
| N | 0.687983  | 1.421375  | 0.000134  |
| H | 0.380720  | -1.644705 | -0.874269 |
| H | 1.838010  | -1.156681 | -0.002179 |
| H | 0.384280  | -1.643523 | 0.876270  |
| O | -1.504892 | 0.039026  | -0.000327 |
| H | -1.636042 | -0.913086 | 0.002441  |

**INT1**

8

|   |           |           |           |
|---|-----------|-----------|-----------|
| C | 0.977548  | -1.039712 | -0.000051 |
| C | 0.287100  | 0.298465  | -0.000054 |
| N | 0.706294  | 1.458096  | -0.000026 |
| O | -1.167186 | -0.055779 | 0.000499  |
| H | 0.703435  | -1.635236 | -0.872664 |
| H | 2.056744  | -0.912057 | -0.000195 |
| H | 0.703652  | -1.635113 | 0.872713  |
| H | -1.586413 | 0.813154  | 0.000016  |

**INT2**

8

|   |           |           |           |
|---|-----------|-----------|-----------|
| C | 1.056245  | -1.020758 | -0.000018 |
| C | 0.298433  | 0.281519  | 0.000008  |
| O | -1.176151 | -0.087477 | 0.000239  |
| N | 0.652693  | 1.457374  | -0.000093 |
| H | 0.813144  | -1.628735 | -0.874058 |
| H | 2.128484  | -0.842202 | -0.000184 |
| H | 0.813401  | -1.628629 | 0.874170  |
| H | -1.254570 | -1.047926 | -0.000132 |

**TS3**

8

|   |           |           |           |
|---|-----------|-----------|-----------|
| C | -1.418850 | 0.006344  | -0.000003 |
| C | 0.066441  | 0.131756  | -0.000027 |
| N | 0.839335  | 1.142121  | -0.000135 |
| O | 0.766730  | -1.069436 | 0.000130  |
| H | -1.762689 | -0.549554 | 0.872971  |
| H | -1.902459 | 0.978872  | -0.000381 |
| H | -1.762687 | -0.550232 | -0.872543 |
| H | 1.533101  | -0.147046 | 0.000035  |

**cis-Etlm<sup>-</sup>**

8

|   |           |           |           |
|---|-----------|-----------|-----------|
| C | -0.056908 | 0.136556  | 0.000072  |
| C | 1.440251  | -0.069370 | 0.001143  |
| N | 1.860693  | -1.312215 | 0.001837  |
| O | 2.155290  | 0.992618  | 0.001053  |
| H | -0.614360 | -0.797090 | 0.000269  |
| H | -0.356236 | 0.718518  | 0.872240  |
| H | -0.355130 | 0.717449  | -0.873191 |
| H | 2.881448  | -1.268098 | 0.002368  |

**trans-syn-Etlm<sup>-</sup>**

9

|   |           |           |           |
|---|-----------|-----------|-----------|
| C | -0.077756 | 0.145042  | -0.000027 |
| C | 1.368887  | -0.181500 | 0.000458  |
| O | 1.573744  | -1.521953 | 0.001619  |
| N | 2.369558  | 0.608947  | 0.000359  |
| H | -0.237882 | 1.217697  | -0.000918 |
| H | -0.561582 | -0.287386 | -0.874176 |
| H | -0.561866 | -0.285955 | 0.874675  |
| H | 2.029990  | 1.565370  | -0.000255 |
| H | 2.529890  | -1.668573 | 0.002093  |

**trans-anti-Etlm**

9

|   |           |           |           |
|---|-----------|-----------|-----------|
| C | -0.093746 | 0.157763  | 0.000116  |
| C | 1.350000  | -0.190372 | 0.000336  |
| O | 1.624408  | -1.523878 | 0.000470  |
| N | 2.355465  | 0.593117  | 0.000411  |
| H | -0.242229 | 1.232133  | -0.000019 |
| H | -0.583264 | -0.267806 | -0.875262 |
| H | -0.583456 | -0.267613 | 0.875484  |
| H | 2.013191  | 1.548006  | 0.000311  |
| H | 0.799217  | -2.021723 | 0.000385  |

**OC1**

12

|   |           |           |           |
|---|-----------|-----------|-----------|
| C | -0.941751 | 2.618729  | 0.369563  |
| C | -0.527305 | 1.374829  | 1.060692  |
| O | -0.351346 | 1.575398  | 2.386244  |
| N | -0.319458 | 0.215542  | 0.567713  |
| O | -3.425210 | 0.487459  | 1.685153  |
| O | -2.673749 | -0.736986 | 2.129760  |
| H | -0.506305 | 0.242172  | -0.429282 |
| H | -0.103768 | 0.726447  | 2.779873  |
| H | -1.821548 | 3.037837  | 0.853615  |
| H | -0.152708 | 3.366653  | 0.437005  |
| H | -1.162004 | 2.430325  | -0.675571 |
| H | -1.847229 | -0.633657 | 1.632549  |

**TS4**

12

|   |           |           |           |
|---|-----------|-----------|-----------|
| C | -0.849100 | 1.178139  | -0.820789 |
| C | -0.189531 | 0.281328  | 0.170273  |
| O | 0.616024  | -0.726738 | -0.418242 |
| O | 2.037745  | -0.251067 | -0.319093 |
| N | 0.152789  | 0.596506  | 1.370570  |
| O | -1.682618 | -1.145424 | 0.056326  |
| H | -1.216798 | 0.629386  | -1.681661 |
| H | -1.676443 | 1.715491  | -0.363728 |
| H | -0.124152 | 1.915940  | -1.171058 |
| H | -1.287952 | -1.705475 | 0.728156  |
| H | -0.323571 | 1.452175  | 1.635626  |
| H | 2.021972  | 0.045967  | 0.609839  |

**OC2**

12

|   |           |           |           |
|---|-----------|-----------|-----------|
| C | -0.977937 | 2.594984  | 0.362741  |
| C | -0.543141 | 1.371864  | 1.083300  |
| N | -0.319917 | 0.209619  | 0.604998  |
| O | -0.336165 | 1.515497  | 2.416790  |
| O | -2.765414 | -0.698313 | 2.062540  |
| H | -0.511352 | 0.232668  | -0.390752 |
| H | -0.569583 | 2.410263  | 2.688402  |
| H | -1.840938 | 3.036925  | 0.858491  |
| H | -0.181748 | 3.339267  | 0.376557  |
| H | -1.234544 | 2.374476  | -0.667867 |
| H | -1.904744 | -0.589552 | 1.628608  |
| O | -3.473060 | 0.545694  | 1.599005  |

**TS5**

12

|   |           |           |           |
|---|-----------|-----------|-----------|
| C | -0.741450 | 1.049351  | -0.988550 |
| C | -0.172326 | 0.298702  | 0.169474  |
| N | 0.128477  | 0.796505  | 1.316454  |
| O | 0.597697  | -0.833048 | -0.199815 |
| O | 2.016310  | -0.335769 | -0.322559 |
| O | -1.698480 | -1.082235 | 0.301384  |
| H | -1.074580 | 0.389616  | -1.784337 |
| H | -1.576353 | 1.670215  | -0.673523 |
| H | 0.025644  | 1.709880  | -1.399565 |
| H | -1.900365 | -1.218518 | -0.627113 |
| H | -0.314262 | 1.706112  | 1.402466  |
| H | 2.099009  | 0.087251  | 0.549263  |

**trans-syn-PAIA**

10

|   |           |           |           |
|---|-----------|-----------|-----------|
| C | -1.738783 | -0.646238 | -0.046128 |
| C | -0.477475 | 0.096754  | 0.179578  |
| N | -0.239757 | 1.344923  | 0.237189  |
| O | 0.557152  | -0.771958 | 0.346181  |
| O | 1.799851  | -0.071462 | 0.570332  |
| H | -1.576353 | -1.719511 | -0.056466 |
| H | -1.087153 | 1.881634  | 0.098763  |
| H | 1.478917  | 0.863265  | 0.528061  |
| H | -2.175595 | -0.346053 | -0.995233 |
| H | -2.450354 | -0.406355 | 0.740128  |

**OC3**

10

|   |           |           |           |
|---|-----------|-----------|-----------|
| C | 0.855733  | 0.268130  | -0.127943 |
| C | 1.782221  | -0.698578 | -0.639117 |
| N | 0.108931  | 1.050296  | 0.282977  |
| O | -2.421669 | -0.032503 | 1.035596  |
| H | 2.305392  | -0.297506 | -1.503242 |
| H | 2.509865  | -0.960177 | 0.124886  |
| H | 1.246195  | -1.596809 | -0.937233 |
| O | -2.022448 | -1.302877 | 0.466691  |
| H | -1.588257 | -1.725126 | 1.220537  |
| H | -1.641971 | 0.518466  | 0.822988  |

**TS6**

10

|   |           |           |           |
|---|-----------|-----------|-----------|
| C | 1.157453  | 0.241284  | 0.007009  |
| C | 1.865428  | -0.989988 | 0.000044  |
| N | 0.872392  | 1.390425  | 0.016139  |
| O | -1.069858 | 0.157925  | -0.029423 |
| H | 1.611224  | -1.559179 | -0.890973 |
| H | 2.937120  | -0.785514 | 0.003801  |
| H | 1.607075  | -1.572379 | 0.881230  |
| O | -2.379561 | -0.444852 | -0.094069 |
| H | -2.604131 | -0.556410 | 0.837885  |
| H | -0.199962 | 1.528149  | 0.000699  |

**OC4**

9

|   |           |           |           |
|---|-----------|-----------|-----------|
| C | -1.116481 | 0.658494  | 0.028760  |
| C | -1.996782 | -0.474571 | -0.001171 |
| N | -0.421216 | 1.585287  | 0.043610  |
| O | 1.259644  | -1.346065 | 0.117524  |
| H | -1.862958 | -1.072837 | 0.896334  |
| H | -3.031353 | -0.143531 | -0.057244 |
| H | -1.772179 | -1.091076 | -0.867714 |
| O | 2.080148  | -0.109438 | -0.104651 |
| H | 1.402879  | 0.577117  | -0.038573 |

**TS7**

9

|   |           |           |           |
|---|-----------|-----------|-----------|
| C | -1.788019 | -0.508213 | 0.000592  |
| C | -0.629585 | 0.387106  | -0.000726 |
| N | -0.207302 | 1.502005  | -0.000466 |
| O | 0.699300  | -0.931563 | -0.001443 |
| O | 1.896251  | -0.109463 | 0.001200  |
| H | -1.786021 | -1.138331 | 0.887495  |
| H | -2.712811 | 0.064546  | -0.017748 |
| H | -1.767531 | -1.167313 | -0.864684 |
| H | 1.458694  | 0.781914  | 0.000953  |

**cis-PAIA**

9

|   |           |           |           |
|---|-----------|-----------|-----------|
| C | 2.419430  | -0.336092 | 0.000060  |
| C | 1.007464  | 0.131390  | 0.000159  |
| O | 0.170498  | -0.924575 | 0.000158  |
| O | -1.236735 | -0.543898 | 0.000241  |
| N | 0.657647  | 1.361510  | 0.000221  |
| H | 2.624326  | -0.950039 | -0.875462 |
| H | 3.098475  | 0.509926  | 0.000142  |
| H | 2.624387  | -0.950264 | 0.875409  |
| H | -0.365983 | 1.338661  | 0.000264  |

**OC5**

19

|   |           |           |           |
|---|-----------|-----------|-----------|
| C | -1.950003 | 0.193815  | -1.288695 |
| C | -2.938626 | -0.247774 | -0.270505 |
| O | -4.192584 | -0.051686 | -0.740134 |
| O | -5.216594 | -0.563319 | 0.157659  |
| N | -2.629423 | -0.761181 | 0.856682  |
| O | -4.939884 | -3.041984 | -0.476245 |
| O | -4.210789 | -2.863912 | -1.711765 |
| C | -4.990876 | -2.446556 | -2.745811 |
| C | -4.105419 | -2.197386 | -3.915702 |
| N | -6.248498 | -2.286278 | -2.637566 |
| H | -0.986143 | 0.380313  | -0.826339 |
| H | -1.822023 | -0.584968 | -2.040600 |
| H | -2.283179 | 1.092165  | -1.803170 |
| H | -3.515596 | -0.991927 | 1.310502  |
| H | -5.089145 | -2.056447 | -0.190756 |
| H | -4.674867 | -2.262015 | -4.837592 |
| H | -3.685340 | -1.194816 | -3.840502 |
| H | -3.276695 | -2.899964 | -3.951764 |
| H | -6.594918 | -1.975664 | -3.540197 |

**TS8**

11

|   |           |           |           |
|---|-----------|-----------|-----------|
| C | -2.200336 | -0.742561 | -0.357263 |
| C | -1.098461 | 0.147961  | 0.119760  |
| O | -1.118681 | 1.371726  | -0.016092 |
| N | -0.050606 | -0.452369 | 0.763703  |
| H | 1.274792  | 0.385072  | 0.758514  |
| H | 0.055850  | -1.430578 | 0.498903  |
| H | -3.104116 | -0.168096 | -0.532183 |
| H | -2.404559 | -1.545746 | 0.347118  |
| H | -1.888106 | -1.209291 | -1.291804 |
| O | 1.680824  | 0.351837  | -0.199073 |
| O | 2.714502  | -0.385710 | -0.247516 |

**AcAm + <sup>1</sup>O<sub>2</sub>**

11

|   |           |           |           |
|---|-----------|-----------|-----------|
| C | -2.042574 | -0.378449 | -0.444381 |
| C | -0.597738 | -0.366026 | -0.072621 |
| O | 0.142276  | 0.542715  | -0.499459 |
| N | -0.146322 | -1.338864 | 0.710434  |
| O | 2.250933  | 0.943446  | 1.491927  |
| H | -0.757670 | -2.059783 | 1.048238  |
| H | -2.504115 | 0.547153  | -0.109288 |
| H | -2.574245 | -1.221356 | -0.014409 |
| H | -2.132164 | -0.411455 | -1.527273 |
| H | 0.828286  | -1.339720 | 0.967171  |
| O | 2.155431  | 0.305610  | 0.442020  |

**OC6**

19

|   |           |           |           |
|---|-----------|-----------|-----------|
| C | 1.735183  | -1.453668 | -1.421030 |
| C | 2.271147  | -0.525097 | -0.399668 |
| O | 3.054344  | 0.416916  | -0.995387 |
| O | 3.572052  | 1.357309  | -0.028265 |
| N | 2.125954  | -0.486129 | 0.863120  |
| O | -0.227476 | 1.340107  | -1.137983 |
| O | -0.975059 | 0.299059  | -0.441117 |
| C | -2.291340 | 0.567788  | -0.354833 |
| C | -2.994243 | -0.534898 | 0.353995  |
| N | -2.871631 | 1.610765  | -0.813513 |
| H | 2.546609  | -1.990582 | -1.908320 |
| H | 1.064094  | -2.168304 | -0.956516 |
| H | 1.195891  | -0.899069 | -2.185917 |
| H | 1.511406  | -1.226957 | 1.176769  |
| H | 3.165997  | 0.994607  | 0.797117  |
| H | -4.048195 | -0.302263 | 0.463318  |
| H | -2.898133 | -1.471184 | -0.193737 |
| H | -2.566030 | -0.697674 | 1.341667  |
| H | -2.121806 | 2.160571  | -1.241597 |

**TS9**

19

|   |           |           |           |
|---|-----------|-----------|-----------|
| C | 1.320084  | 0.462013  | 0.164346  |
| C | 0.614782  | 1.191877  | 1.266918  |
| N | 2.220848  | 0.992966  | -0.647320 |
| O | 1.692148  | -0.794014 | 0.697547  |
| H | 1.324616  | 1.455349  | 2.049165  |
| H | 0.175591  | 2.105108  | 0.874067  |
| H | -0.175506 | 0.589552  | 1.712750  |
| H | 2.072184  | 1.990435  | -0.712975 |
| O | -1.025362 | -0.754069 | -0.329654 |
| C | -2.165332 | -0.029192 | -0.182957 |
| C | -3.212440 | -0.885225 | 0.433262  |
| H | -4.150403 | -0.344502 | 0.497485  |
| H | -3.362541 | -1.793661 | -0.146534 |
| H | -2.911426 | -1.190402 | 1.434369  |
| N | -2.340886 | 1.190113  | -0.511445 |
| H | -1.454606 | 1.525777  | -0.890619 |
| H | 2.948729  | -0.606457 | -0.675165 |
| O | 0.079686  | 0.047973  | -0.918030 |
| O | 2.632412  | -1.431089 | -0.214939 |

**INT4 +cis-Etlm**

19

|   |           |           |           |
|---|-----------|-----------|-----------|
| C | 0.971601  | 1.341416  | 1.373240  |
| C | 1.564944  | 0.653706  | 0.195179  |
| O | 0.958378  | 0.759608  | -1.038993 |
| O | -1.268332 | -1.075274 | 0.100066  |
| C | -2.278173 | -0.288564 | 0.156582  |
| N | -2.319931 | 0.983801  | -0.159247 |
| N | 2.346083  | 1.313260  | -0.794953 |
| O | 1.977827  | -0.613846 | 0.613858  |
| O | 2.498007  | -1.376096 | -0.493260 |
| C | -3.566126 | -0.910257 | 0.644861  |
| H | 1.719787  | 1.480466  | 2.149367  |
| H | 0.593047  | 2.312519  | 1.067083  |
| H | 0.153287  | 0.750460  | 1.778417  |
| H | 2.174333  | 2.314384  | -0.674303 |
| H | -4.397326 | -0.209498 | 0.667779  |
| H | -3.840088 | -1.753194 | 0.009853  |
| H | -3.427217 | -1.314827 | 1.648009  |
| H | -1.376228 | 1.235723  | -0.459824 |
| H | 3.430609  | -1.113302 | -0.491746 |

## INT4

11

|   |          |           |           |
|---|----------|-----------|-----------|
| C | 0.985113 | 1.345329  | 1.373615  |
| C | 1.575635 | 0.661040  | 0.193584  |
| O | 1.978517 | -0.613608 | 0.601285  |
| O | 2.523932 | -1.357557 | -0.506292 |
| O | 0.964791 | 0.775721  | -1.042621 |
| N | 2.354174 | 1.320517  | -0.795483 |
| H | 1.731027 | 1.470620  | 2.153759  |
| H | 0.618864 | 2.322774  | 1.074850  |
| H | 0.158694 | 0.764130  | 1.773933  |
| H | 2.187956 | 2.322042  | -0.669512 |
| H | 3.457619 | -1.101434 | -0.472312 |

## TS10

11

|   |           |           |           |
|---|-----------|-----------|-----------|
| C | 1.540863  | -0.954881 | -0.008654 |
| C | 0.333898  | -0.086042 | 0.050009  |
| O | 0.192426  | 0.804387  | 1.047144  |
| N | 0.415922  | 1.186822  | -0.762069 |
| O | -0.782651 | -0.841000 | -0.291800 |
| O | -1.961346 | -0.215315 | 0.056003  |
| H | 1.551239  | -1.518435 | -0.937368 |
| H | 1.514300  | -1.649989 | 0.825945  |
| H | 1.211936  | 1.780413  | -0.556034 |
| H | -0.464598 | 1.691729  | -0.796573 |
| H | 2.439676  | -0.350504 | 0.059608  |

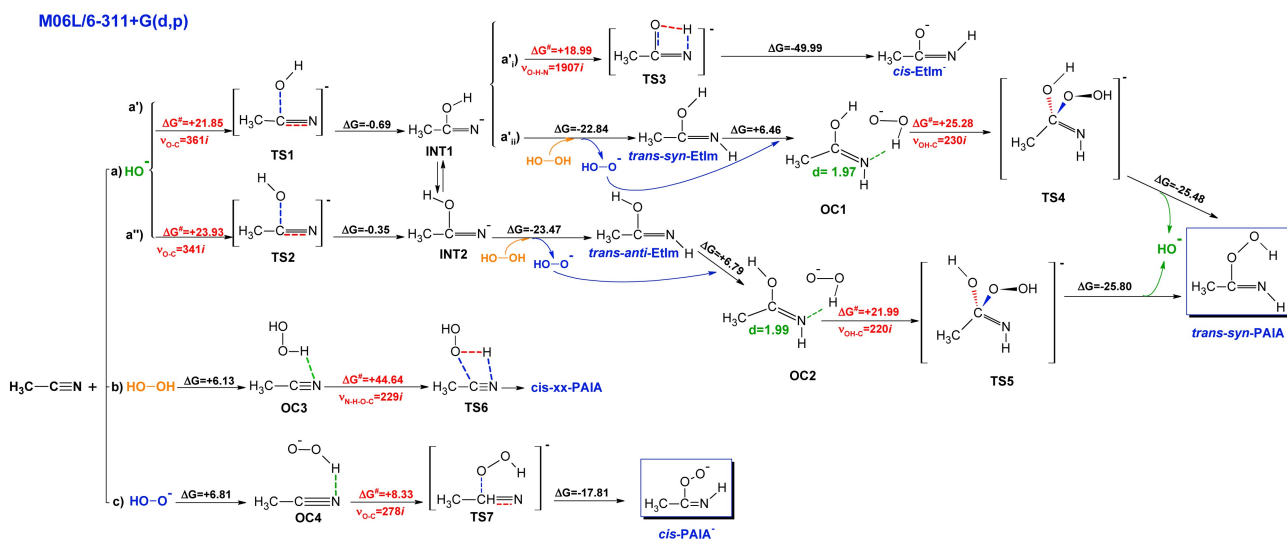

**Scheme S1a** revised formation mechanism of *trans-syn-PAIA* and *cis-PAIA*<sup>-</sup> at M06L/6-311G+(d,p) level of theory.

**M06L/6-311+G(d,p)**

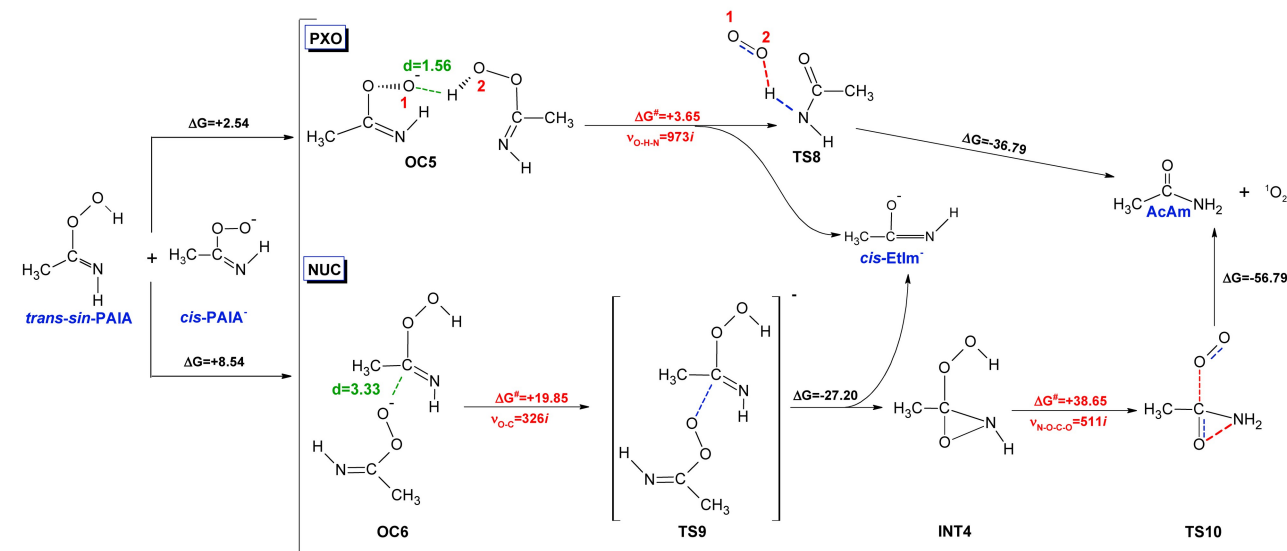

**Scheme S1b** revised formation mechanism of Acetamide (AcAm) at M06L/6-311G+(d,p) level of theory.
