# Supplementary material for: The reaction of acetonitrile with hydrogen peroxide in alkaline medium: a DFT mechanistic study of green production of amides
Source: Royal Society of Chemistry journal article supplement (doi:10.1039/d3cp02024j), 2023-01-01
Supplement: d3cp02024j2.log [file d3cp02024j2.log]

 Entering Gaussian System, Link 0=/local/share/g09/g09
 Initial command:
 /local/share/g09/l1.exe /local/scratch/carlotto/g09run1175/Gau-1315.inp -scrdir=/local/scratch/carlotto/g09run1175/
 Entering Link 1 = /local/share/g09/l1.exe PID=      1316.
  
 Copyright (c) 1988,1990,1992,1993,1995,1998,2003,2009,2010,
            Gaussian, Inc.  All Rights Reserved.
  
 This is part of the Gaussian(R) 09 program.  It is based on
 the Gaussian(R) 03 system (copyright 2003, Gaussian, Inc.),
 the Gaussian(R) 98 system (copyright 1998, Gaussian, Inc.),
 the Gaussian(R) 94 system (copyright 1995, Gaussian, Inc.),
 the Gaussian 92(TM) system (copyright 1992, Gaussian, Inc.),
 the Gaussian 90(TM) system (copyright 1990, Gaussian, Inc.),
 the Gaussian 88(TM) system (copyright 1988, Gaussian, Inc.),
 the Gaussian 86(TM) system (copyright 1986, Carnegie Mellon
 University), and the Gaussian 82(TM) system (copyright 1983,
 Carnegie Mellon University). Gaussian is a federally registered
 trademark of Gaussian, Inc.
  
 This software contains proprietary and confidential information,
 including trade secrets, belonging to Gaussian, Inc.
  
 This software is provided under written license and may be
 used, copied, transmitted, or stored only in accord with that
 written license.
  
 The following legend is applicable only to US Government
 contracts under FAR:
  
                    RESTRICTED RIGHTS LEGEND
  
 Use, reproduction and disclosure by the US Government is
 subject to restrictions as set forth in subparagraphs (a)
 and (c) of the Commercial Computer Software - Restricted
 Rights clause in FAR 52.227-19.
  
 Gaussian, Inc.
 340 Quinnipiac St., Bldg. 40, Wallingford CT 06492
  
  
 ---------------------------------------------------------------
 Warning -- This program may not be used in any manner that
 competes with the business of Gaussian, Inc. or will provide
 assistance to any competitor of Gaussian, Inc.  The licensee
 of this program is prohibited from giving any competitor of
 Gaussian, Inc. access to this program.  By using this program,
 the user acknowledges that Gaussian, Inc. is engaged in the
 business of creating and licensing software in the field of
 computational chemistry and represents and warrants to the
 licensee that it is not a competitor of Gaussian, Inc. and that
 it will not use this program in any manner prohibited above.
 ---------------------------------------------------------------
  

 Cite this work as:
 Gaussian 09, Revision B.01,
 M. J. Frisch, G. W. Trucks, H. B. Schlegel, G. E. Scuseria, 
 M. A. Robb, J. R. Cheeseman, G. Scalmani, V. Barone, B. Mennucci, 
 G. A. Petersson, H. Nakatsuji, M. Caricato, X. Li, H. P. Hratchian, 
 A. F. Izmaylov, J. Bloino, G. Zheng, J. L. Sonnenberg, M. Hada, 
 M. Ehara, K. Toyota, R. Fukuda, J. Hasegawa, M. Ishida, T. Nakajima, 
 Y. Honda, O. Kitao, H. Nakai, T. Vreven, J. A. Montgomery, Jr., 
 J. E. Peralta, F. Ogliaro, M. Bearpark, J. J. Heyd, E. Brothers, 
 K. N. Kudin, V. N. Staroverov, T. Keith, R. Kobayashi, J. Normand, 
 K. Raghavachari, A. Rendell, J. C. Burant, S. S. Iyengar, J. Tomasi, 
 M. Cossi, N. Rega, J. M. Millam, M. Klene, J. E. Knox, J. B. Cross, 
 V. Bakken, C. Adamo, J. Jaramillo, R. Gomperts, R. E. Stratmann, 
 O. Yazyev, A. J. Austin, R. Cammi, C. Pomelli, J. W. Ochterski, 
 R. L. Martin, K. Morokuma, V. G. Zakrzewski, G. A. Voth, 
 P. Salvador, J. J. Dannenberg, S. Dapprich, A. D. Daniels, 
 O. Farkas, J. B. Foresman, J. V. Ortiz, J. Cioslowski, 
 and D. J. Fox, Gaussian, Inc., Wallingford CT, 2010.
 
 ******************************************
 Gaussian 09:  EM64L-G09RevB.01 12-Aug-2010
                27-Apr-2023 
 ******************************************
 %NProcLinda=4
 Will use up to    4 processors via Linda.
 %NProcShared=4
 Will use up to    4 processors via shared memory.
 %Chk=acn_prot.chk
 ----------------------------------------------------------------------
 #p test rM06L/6-31G(d,p) density=Current int(ultrafine,acc2e=11) GFInp
  irc=(CalcFC,reverse,maxpoints=40,stepsize=10) freq(NoRaman) popul(Ful
 l,NBORead) scf(MaxCycle=200) scrf(SMD,solvent=water)
 ----------------------------------------------------------------------
 1/10=4,14=-1,18=10,22=2,26=3,38=1,39=10,42=40,44=3/1,23;
 2/12=2,17=6,18=5,29=1,40=1/2;
 3/5=1,6=6,7=101,11=2,16=1,24=10,25=1,30=1,70=32201,71=2,72=1,74=-53,75=-5,116=1/1,2,3;
 4//1;
 5/5=2,7=200,38=5,53=1,87=11/2;
 8/6=4,10=90,11=11,87=11/1;
 11/6=1,8=1,9=11,15=111,16=1,87=11/1,2,10;
 10/6=1,7=6,13=1,87=11/2;
 6/7=3,22=-1,28=1,40=1/1,7;
 7/10=1,18=20,25=1,87=11/1,2,3,16;
 1/10=4,14=-1,18=10,22=2,39=10,42=40,44=3/23(3);
 2/29=1/2;
 7/9=1,25=1,44=-1,87=11/16;
 99/5=20/99;
 2/29=1/2;
 3/5=1,6=6,7=101,11=2,16=1,25=1,30=1,70=32205,71=2,72=1,74=-53,75=-5,116=1/1,2,3;
 4/5=5,16=3/1;
 5/5=2,7=200,38=5,53=1,87=11/2;
 8/6=4,10=90,11=11,87=11/1;
 11/6=1,8=1,9=11,15=111,16=1,87=11/1,2,10;
 10/6=1,7=6,13=1,87=11/2;
 7/10=1,18=20,25=1,87=11/1,2,3,16;
 1/14=-1,18=10,22=2,39=10,42=40,44=3/23(-8);
 2/29=1/2;
 6/7=3,19=2,22=-1,28=1,40=1/1,7;
 7/9=1,25=1,44=-1,87=11/16;
 99/5=20,9=1/99;
 Leave Link    1 at Thu Apr 27 10:48:23 2023, MaxMem=          0 cpu:       0.4
 (Enter /local/share/g09/l101.exe)
 ---
 TS1
 ---
 Symbolic Z-matrix:
 Charge = -1 Multiplicity = 1
 C                    -0.74007   0.42838  -0.00099 
 C                    -1.78479  -0.58977   0.00073 
 N                    -0.30661   1.53657  -0.00044 
 O                     0.81616  -0.97373  -0.00161 
 H                    -1.70533  -1.21127   0.89503 
 H                    -2.77689  -0.12992  -0.02538 
 H                    -1.67441  -1.24711  -0.86394 
 O                     1.93689  -0.02834   0.00132 
 H                     1.42766   0.81724   0.00125 
 
 NAtoms=      9 NQM=      9 NQMF=      0 NMic=      0 NMicF=      0 NTot=      9.
                    Isotopes and Nuclear Properties:
 (Nuclear quadrupole moments (NQMom) in fm**2, nuclear magnetic moments (NMagM)
  in nuclear magnetons)

  Atom         1           2           3           4           5           6           7           8           9
 IAtWgt=          12          12          14          16           1           1           1          16           1
 AtmWgt=  12.0000000  12.0000000  14.0030740  15.9949146   1.0078250   1.0078250   1.0078250  15.9949146   1.0078250
 NucSpn=           0           0           2           0           1           1           1           0           1
 AtZEff=   0.0000000   0.0000000   0.0000000   0.0000000   0.0000000   0.0000000   0.0000000   0.0000000   0.0000000
 NQMom=    0.0000000   0.0000000   2.0440000   0.0000000   0.0000000   0.0000000   0.0000000   0.0000000   0.0000000
 NMagM=    0.0000000   0.0000000   0.4037610   0.0000000   2.7928460   2.7928460   2.7928460   0.0000000   2.7928460
 Leave Link  101 at Thu Apr 27 10:48:24 2023, MaxMem=   33554432 cpu:       0.6
 (Enter /local/share/g09/l123.exe)
 IRC-IRC-IRC-IRC-IRC-IRC-IRC-IRC-IRC-IRC-IRC-IRC-IRC-IRC-IRC-IRC-IRC-IRC
 ------------------------------------------------------------------------
 INPUT DATA FOR L123
 ------------------------------------------------------------------------
 GENERAL PARAMETERS:
 Rxn path following direction = Reverse
 Maximum points per path      =  40
 Step size                    =   0.100 bohr
 Integration scheme           = HPC                                 
    Redo corrector integration= Yes                                 
    Max correction cycles     =  20
 Initial Hessian              = CalcFC
 Hessian eveluation           = All updating
    Hessian updating method   = Bofill                              
 ------------------------------------------------------------------------
 IRC-IRC-IRC-IRC-IRC-IRC-IRC-IRC-IRC-IRC-IRC-IRC-IRC-IRC-IRC-IRC-IRC-IRC
 Leave Link  123 at Thu Apr 27 10:48:24 2023, MaxMem=   33554432 cpu:       0.0
 (Enter /local/share/g09/l202.exe)
                          Input orientation:                          
 ---------------------------------------------------------------------
 Center     Atomic      Atomic             Coordinates (Angstroms)
 Number     Number       Type             X           Y           Z
 ---------------------------------------------------------------------
      1          6           0       -0.740073    0.428381   -0.000992
      2          6           0       -1.784788   -0.589774    0.000728
      3          7           0       -0.306614    1.536566   -0.000439
      4          8           0        0.816162   -0.973730   -0.001607
      5          1           0       -1.705333   -1.211270    0.895031
      6          1           0       -2.776886   -0.129916   -0.025377
      7          1           0       -1.674410   -1.247110   -0.863937
      8          8           0        1.936892   -0.028339    0.001318
      9          1           0        1.427657    0.817244    0.001249
 ---------------------------------------------------------------------
                    Distance matrix (angstroms):
                    1          2          3          4          5
     1  C    0.000000
     2  C    1.458791   0.000000
     3  N    1.189942   2.589657   0.000000
     4  O    2.094704   2.629138   2.749948   0.000000
     5  H    2.103102   1.091947   3.210745   2.686694   0.000000
     6  H    2.112084   1.093805   2.979938   3.690878   1.778961
     7  H    2.103552   1.091751   3.219526   2.649773   1.759605
     8  O    2.715647   3.763790   2.735370   1.466223   3.932410
     9  H    2.202333   3.507065   1.877531   1.892491   3.837882
                    6          7          8          9
     6  H    0.000000
     7  H    1.779539   0.000000
     8  O    4.714948   3.908398   0.000000
     9  H    4.309989   3.825301   0.987082   0.000000
 Symmetry turned off by external request.
 Stoichiometry    C2H4NO2(1-)
 Framework group  C1[X(C2H4NO2)]
 Deg. of freedom    21
 Full point group                 C1      NOp   1
 Rotational constants (GHZ):      8.5043787      3.7696094      2.6546949
 Leave Link  202 at Thu Apr 27 10:48:24 2023, MaxMem=   33554432 cpu:       0.2
 (Enter /local/share/g09/l301.exe)
 Standard basis: 6-31G(d,p) (6D, 7F)
 Ernie: Thresh=  0.10000D-02 Tol=  0.10000D-05 Strict=F.
 AO basis set in the form of general basis input (Overlap normalization):
      1 0
 S   6 1.00       0.000000000000
      0.3047524880D+04  0.1834737132D-02
      0.4573695180D+03  0.1403732281D-01
      0.1039486850D+03  0.6884262226D-01
      0.2921015530D+02  0.2321844432D+00
      0.9286662960D+01  0.4679413484D+00
      0.3163926960D+01  0.3623119853D+00
 SP   3 1.00       0.000000000000
      0.7868272350D+01 -0.1193324198D+00  0.6899906659D-01
      0.1881288540D+01 -0.1608541517D+00  0.3164239610D+00
      0.5442492580D+00  0.1143456438D+01  0.7443082909D+00
 SP   1 1.00       0.000000000000
      0.1687144782D+00  0.1000000000D+01  0.1000000000D+01
 D   1 1.00       0.000000000000
      0.8000000000D+00  0.1000000000D+01
 ****
      2 0
 S   6 1.00       0.000000000000
      0.3047524880D+04  0.1834737132D-02
      0.4573695180D+03  0.1403732281D-01
      0.1039486850D+03  0.6884262226D-01
      0.2921015530D+02  0.2321844432D+00
      0.9286662960D+01  0.4679413484D+00
      0.3163926960D+01  0.3623119853D+00
 SP   3 1.00       0.000000000000
      0.7868272350D+01 -0.1193324198D+00  0.6899906659D-01
      0.1881288540D+01 -0.1608541517D+00  0.3164239610D+00
      0.5442492580D+00  0.1143456438D+01  0.7443082909D+00
 SP   1 1.00       0.000000000000
      0.1687144782D+00  0.1000000000D+01  0.1000000000D+01
 D   1 1.00       0.000000000000
      0.8000000000D+00  0.1000000000D+01
 ****
      3 0
 S   6 1.00       0.000000000000
      0.4173511460D+04  0.1834772160D-02
      0.6274579110D+03  0.1399462700D-01
      0.1429020930D+03  0.6858655181D-01
      0.4023432930D+02  0.2322408730D+00
      0.1282021290D+02  0.4690699481D+00
      0.4390437010D+01  0.3604551991D+00
 SP   3 1.00       0.000000000000
      0.1162636186D+02 -0.1149611817D+00  0.6757974388D-01
      0.2716279807D+01 -0.1691174786D+00  0.3239072959D+00
      0.7722183966D+00  0.1145851947D+01  0.7408951398D+00
 SP   1 1.00       0.000000000000
      0.2120314975D+00  0.1000000000D+01  0.1000000000D+01
 D   1 1.00       0.000000000000
      0.8000000000D+00  0.1000000000D+01
 ****
      4 0
 S   6 1.00       0.000000000000
      0.5484671660D+04  0.1831074430D-02
      0.8252349460D+03  0.1395017220D-01
      0.1880469580D+03  0.6844507810D-01
      0.5296450000D+02  0.2327143360D+00
      0.1689757040D+02  0.4701928980D+00
      0.5799635340D+01  0.3585208530D+00
 SP   3 1.00       0.000000000000
      0.1553961625D+02 -0.1107775495D+00  0.7087426823D-01
      0.3599933586D+01 -0.1480262627D+00  0.3397528391D+00
      0.1013761750D+01  0.1130767015D+01  0.7271585773D+00
 SP   1 1.00       0.000000000000
      0.2700058226D+00  0.1000000000D+01  0.1000000000D+01
 D   1 1.00       0.000000000000
      0.8000000000D+00  0.1000000000D+01
 ****
      5 0
 S   3 1.00       0.000000000000
      0.1873113696D+02  0.3349460434D-01
      0.2825394365D+01  0.2347269535D+00
      0.6401216923D+00  0.8137573261D+00
 S   1 1.00       0.000000000000
      0.1612777588D+00  0.1000000000D+01
 P   1 1.00       0.000000000000
      0.1100000000D+01  0.1000000000D+01
 ****
      6 0
 S   3 1.00       0.000000000000
      0.1873113696D+02  0.3349460434D-01
      0.2825394365D+01  0.2347269535D+00
      0.6401216923D+00  0.8137573261D+00
 S   1 1.00       0.000000000000
      0.1612777588D+00  0.1000000000D+01
 P   1 1.00       0.000000000000
      0.1100000000D+01  0.1000000000D+01
 ****
      7 0
 S   3 1.00       0.000000000000
      0.1873113696D+02  0.3349460434D-01
      0.2825394365D+01  0.2347269535D+00
      0.6401216923D+00  0.8137573261D+00
 S   1 1.00       0.000000000000
      0.1612777588D+00  0.1000000000D+01
 P   1 1.00       0.000000000000
      0.1100000000D+01  0.1000000000D+01
 ****
      8 0
 S   6 1.00       0.000000000000
      0.5484671660D+04  0.1831074430D-02
      0.8252349460D+03  0.1395017220D-01
      0.1880469580D+03  0.6844507810D-01
      0.5296450000D+02  0.2327143360D+00
      0.1689757040D+02  0.4701928980D+00
      0.5799635340D+01  0.3585208530D+00
 SP   3 1.00       0.000000000000
      0.1553961625D+02 -0.1107775495D+00  0.7087426823D-01
      0.3599933586D+01 -0.1480262627D+00  0.3397528391D+00
      0.1013761750D+01  0.1130767015D+01  0.7271585773D+00
 SP   1 1.00       0.000000000000
      0.2700058226D+00  0.1000000000D+01  0.1000000000D+01
 D   1 1.00       0.000000000000
      0.8000000000D+00  0.1000000000D+01
 ****
      9 0
 S   3 1.00       0.000000000000
      0.1873113696D+02  0.3349460434D-01
      0.2825394365D+01  0.2347269535D+00
      0.6401216923D+00  0.8137573261D+00
 S   1 1.00       0.000000000000
      0.1612777588D+00  0.1000000000D+01
 P   1 1.00       0.000000000000
      0.1100000000D+01  0.1000000000D+01
 ****

 Integral buffers will be    131072 words long.
 Raffenetti 2 integral format.
 Two-electron integral symmetry is turned off.
    95 basis functions,   168 primitive gaussians,    95 cartesian basis functions
    20 alpha electrons       20 beta electrons
       nuclear repulsion energy       159.2231745833 Hartrees.
 IExCor= 4134 DFT=T Ex+Corr=M06L ExCW=0 ScaHFX=  0.000000
 ScaDFX=  1.000000  1.000000  1.000000  1.000000 ScalE2=  1.000000  1.000000
 IRadAn=      5 IRanWt=     -1 IRanGd=            0 ICorTp=0
 NAtoms=    9 NActive=    9 NUniq=    9 SFac= 1.00D+00 NAtFMM=   50 NAOKFM=F Big=F
 ------------------------------------------------------------------------------
 Polarizable Continuum Model (PCM)
 =================================
 Model                : PCM.
 Atomic radii         : SMD-Coulomb.
 Polarization charges : Total charges.
 Charge compensation  : None.
 Solution method      : Matrix inversion.
 Cavity type          : VdW (van der Waals Surface) (Alpha=1.000).
 Cavity algorithm     : GePol (No added spheres)
                        Default sphere list used, NSphG=    9.
                        Lebedev-Laikov grids with approx.  5.0 points / Ang**2.
                        Smoothing algorithm: Karplus/York (Gamma=1.0000).
                        Polarization charges: spherical gaussians, with
                                              point-specific exponents (IZeta= 3).
                        Self-potential: point-specific (ISelfS= 7).
                        Self-field    : sphere-specific E.n sum rule (ISelfD= 2).
 1st derivatives      : Analytical E(r).r(x)/FMM algorithm (CHGder, D1EAlg=3).
                        Cavity 1st derivative terms included.
 2nd derivatives      : Analytical E(r).r(xy)/FMM algorithm (CHGder, D2EAlg=3).
                        Cavity 2nd derivative terms included.
 Solvent              : Water, Eps=  78.355300 Eps(inf)=   1.777849
 ------------------------------------------------------------------------------
 Spheres list:
 ISph  on   Nord    Re0     Alpha      Xe            Ye            Ze
    1   C      1    1.850   1.000     -0.740073      0.428381     -0.000992
    2   C      2    1.850   1.000     -1.784788     -0.589774      0.000728
    3   N      3    1.890   1.000     -0.306614      1.536566     -0.000439
    4   O      4    1.520   1.000      0.816162     -0.973730     -0.001607
    5   H      5    1.200   1.000     -1.705333     -1.211270      0.895031
    6   H      6    1.200   1.000     -2.776886     -0.129916     -0.025377
    7   H      7    1.200   1.000     -1.674410     -1.247110     -0.863937
    8   O      8    1.520   1.000      1.936892     -0.028339      0.001318
    9   H      9    1.200   1.000      1.427657      0.817244      0.001249
 ------------------------------------------------------------------------------
 GePol: Number of generator spheres                  =       9
 GePol: Total number of spheres                      =       9
 GePol: Number of exposed spheres                    =       9 (100.00%)
 GePol: Number of points                             =     800
 GePol: Average weight of points                     =       0.13
 GePol: Minimum weight of points                     =   0.11D-08
 GePol: Maximum weight of points                     =    0.21991
 GePol: Number of points with low weight             =      31
 GePol: Fraction of low-weight points (<1% of avg)   =       3.88%
 GePol: Cavity surface area                          =    105.109 Ang**2
 GePol: Cavity volume                                =     79.272 Ang**3
 ------------------------------------------------------------------------------
 Atomic radii for non-electrostatic terms: SMD-CDS.
 ------------------------------------------------------------------------------
 PCM non-electrostatic energy =         0.0048574881 Hartrees.
 Nuclear repulsion after PCM non-electrostatic terms =      159.2280320714 Hartrees.
 Leave Link  301 at Thu Apr 27 10:48:25 2023, MaxMem=   33554432 cpu:       0.6
 (Enter /local/share/g09/linda-exe/l302.exel)
 NPDir=0 NMtPBC=     1 NCelOv=     1 NCel=       1 NClECP=     1 NCelD=      1
         NCelK=      1 NCelE2=     1 NClLst=     1 CellRange=     0.0.
 One-electron integrals computed using PRISM.
 NBasis=    95 RedAO= T  NBF=    95
 NBsUse=    95 1.00D-06 NBFU=    95
 Precomputing XC quadrature grid using
 IXCGrd= 2 IRadAn=           5 IRanWt=          -1 IRanGd=           0 AccXCQ= 0.00D+00.
 NRdTot=     735 NPtTot=      197354 NUsed=      202629 NTot=      202661
 NSgBfM=    95    95    95    95    95 NAtAll=     9     9.
 Leave Link  302 at Thu Apr 27 10:48:28 2023, MaxMem=   33554432 cpu:       2.3
 (Enter /local/share/g09/l303.exe)
 DipDrv:  MaxL=1.
 Leave Link  303 at Thu Apr 27 10:48:29 2023, MaxMem=   33554432 cpu:       0.5
 (Enter /local/share/g09/linda-exe/l401.exel)
 Harris functional with IExCor= 1009 diagonalized for initial guess.
 ExpMin= 1.61D-01 ExpMax= 5.48D+03 ExpMxC= 8.25D+02 IAcc=3 IRadAn=         5 AccDes= 0.00D+00
 HarFok:  IExCor= 1009 AccDes= 0.00D+00 IRadAn=         5 IDoV= 1
 ScaDFX=  1.000000  1.000000  1.000000  1.000000
 FoFCou: FMM=F IPFlag=           0 FMFlag=      100000 FMFlg1=           0
         NFxFlg=           0 DoJE=T BraDBF=F KetDBF=T FulRan=T
         Omega=  0.000000  0.000000  1.000000  0.000000  0.000000 ICntrl=     500 IOpCl=  0
         NMat0=    1 NMatS0=    1 NMatT0=    0 NMatD0=    1 NMtDS0=    0 NMtDT0=    0
         I1Cent=           4 NGrid=           0.
 Symmetry not used in FoFCou.
 Harris En= -283.626859216843    
 Leave Link  401 at Thu Apr 27 10:48:34 2023, MaxMem=   33554432 cpu:       5.1
 (Enter /local/share/g09/linda-exe/l502.exel)
 Closed shell SCF:
 Requested convergence on RMS density matrix=1.00D-08 within 200 cycles.
 Requested convergence on MAX density matrix=1.00D-06.
 Requested convergence on             energy=1.00D-06.
 No special actions if energy rises.
 Using DIIS extrapolation, IDIIS=  1040.
 Two-electron integral symmetry not used.
       202535 words used for storage of precomputed grid.
 Keep J ints in memory in canonical form, NReq=14362560.
 IEnd=      272890 IEndB=      272890 NGot=    33554432 MDV=    22931955
 LenX=    22931955 LenY=    22922489
 Symmetry not used in FoFDir.
 MinBra= 0 MaxBra= 2 Meth= 1.
 IRaf=       0 NMat=   1 IRICut=       1 DoRegI=T DoRafI=F ISym2E= 0 JSym2E=0.

 Cycle   1  Pass 1  IDiag  1:
 E= -283.663338515927    
 DIIS: error= 3.08D-02 at cycle   1 NSaved=   1.
 NSaved= 1 IEnMin= 1 EnMin= -283.663338515927     IErMin= 1 ErrMin= 3.08D-02
 ErrMax= 3.08D-02 EMaxC= 1.00D-01 BMatC= 1.46D-01 BMatP= 1.46D-01
 IDIUse=3 WtCom= 6.92D-01 WtEn= 3.08D-01
 Coeff-Com:  0.100D+01
 Coeff-En:   0.100D+01
 Coeff:      0.100D+01
 Gap=     0.126 Goal=   None    Shift=    0.000
 GapD=    0.126 DampG=1.000 DampE=0.500 DampFc=0.5000 IDamp=-1.
 Damping current iteration by 5.00D-01
 RMSDP=7.65D-03 MaxDP=1.60D-01              OVMax= 1.44D-01

 Cycle   2  Pass 1  IDiag  1:
 E= -283.712423068260     Delta-E=       -0.049084552333 Rises=F Damp=T
 DIIS: error= 1.18D-02 at cycle   2 NSaved=   2.
 NSaved= 2 IEnMin= 2 EnMin= -283.712423068260     IErMin= 2 ErrMin= 1.18D-02
 ErrMax= 1.18D-02 EMaxC= 1.00D-01 BMatC= 1.67D-02 BMatP= 1.46D-01
 IDIUse=3 WtCom= 8.82D-01 WtEn= 1.18D-01
 Coeff-Com:  0.968D-01 0.903D+00
 Coeff-En:   0.178D+00 0.822D+00
 Coeff:      0.106D+00 0.894D+00
 Gap=     0.169 Goal=   None    Shift=    0.000
 RMSDP=2.08D-03 MaxDP=4.72D-02 DE=-4.91D-02 OVMax= 1.42D-01

 Cycle   3  Pass 1  IDiag  1:
 E= -283.764446594962     Delta-E=       -0.052023526701 Rises=F Damp=F
 DIIS: error= 1.15D-02 at cycle   3 NSaved=   3.
 NSaved= 3 IEnMin= 3 EnMin= -283.764446594962     IErMin= 3 ErrMin= 1.15D-02
 ErrMax= 1.15D-02 EMaxC= 1.00D-01 BMatC= 2.17D-02 BMatP= 1.67D-02
 IDIUse=2 WtCom= 0.00D+00 WtEn= 1.00D+00
 Coeff-En:   0.000D+00 0.000D+00 0.100D+01
 Coeff:      0.000D+00 0.000D+00 0.100D+01
 Gap=     0.137 Goal=   None    Shift=    0.000
 RMSDP=3.94D-03 MaxDP=1.09D-01 DE=-5.20D-02 OVMax= 1.48D-01

 Cycle   4  Pass 1  IDiag  1:
 E= -283.653339699201     Delta-E=        0.111106895761 Rises=F Damp=F
 DIIS: error= 3.27D-02 at cycle   4 NSaved=   4.
 NSaved= 4 IEnMin= 3 EnMin= -283.764446594962     IErMin= 3 ErrMin= 1.15D-02
 ErrMax= 3.27D-02 EMaxC= 1.00D-01 BMatC= 1.46D-01 BMatP= 1.67D-02
 IDIUse=2 WtCom= 0.00D+00 WtEn= 1.00D+00
 Coeff-En:   0.000D+00 0.000D+00 0.805D+00 0.195D+00
 Coeff:      0.000D+00 0.000D+00 0.805D+00 0.195D+00
 Gap=     0.147 Goal=   None    Shift=    0.000
 RMSDP=2.04D-03 MaxDP=5.81D-02 DE= 1.11D-01 OVMax= 8.05D-02

 Cycle   5  Pass 1  IDiag  1:
 E= -283.773339617287     Delta-E=       -0.119999918086 Rises=F Damp=F
 DIIS: error= 8.59D-03 at cycle   5 NSaved=   5.
 NSaved= 5 IEnMin= 5 EnMin= -283.773339617287     IErMin= 5 ErrMin= 8.59D-03
 ErrMax= 8.59D-03 EMaxC= 1.00D-01 BMatC= 1.27D-02 BMatP= 1.67D-02
 IDIUse=3 WtCom= 9.14D-01 WtEn= 8.59D-02
 Coeff-Com:  0.927D-02-0.664D-02 0.458D+00 0.315D-01 0.508D+00
 Coeff-En:   0.000D+00 0.000D+00 0.398D+00 0.000D+00 0.602D+00
 Coeff:      0.848D-02-0.607D-02 0.453D+00 0.287D-01 0.516D+00
 Gap=     0.161 Goal=   None    Shift=    0.000
 RMSDP=8.72D-04 MaxDP=2.11D-02 DE=-1.20D-01 OVMax= 3.14D-02

 Cycle   6  Pass 1  IDiag  1:
 E= -283.784572023131     Delta-E=       -0.011232405844 Rises=F Damp=F
 DIIS: error= 1.06D-03 at cycle   6 NSaved=   6.
 NSaved= 6 IEnMin= 6 EnMin= -283.784572023131     IErMin= 6 ErrMin= 1.06D-03
 ErrMax= 1.06D-03 EMaxC= 1.00D-01 BMatC= 1.43D-04 BMatP= 1.27D-02
 IDIUse=3 WtCom= 9.89D-01 WtEn= 1.06D-02
 Coeff-Com:  0.285D-02-0.592D-02 0.205D+00-0.307D-01 0.382D+00 0.446D+00
 Coeff-En:   0.000D+00 0.000D+00 0.000D+00 0.000D+00 0.000D+00 0.100D+01
 Coeff:      0.282D-02-0.586D-02 0.203D+00-0.303D-01 0.378D+00 0.452D+00
 Gap=     0.161 Goal=   None    Shift=    0.000
 RMSDP=9.53D-05 MaxDP=2.32D-03 DE=-1.12D-02 OVMax= 3.78D-03

 Cycle   7  Pass 1  IDiag  1:
 E= -283.784679437859     Delta-E=       -0.000107414728 Rises=F Damp=F
 DIIS: error= 2.19D-04 at cycle   7 NSaved=   7.
 NSaved= 7 IEnMin= 7 EnMin= -283.784679437859     IErMin= 7 ErrMin= 2.19D-04
 ErrMax= 2.19D-04 EMaxC= 1.00D-01 BMatC= 7.72D-06 BMatP= 1.43D-04
 IDIUse=3 WtCom= 9.98D-01 WtEn= 2.19D-03
 Coeff-Com:  0.612D-03-0.102D-02 0.902D-01-0.231D-01 0.194D+00 0.259D+00
 Coeff-Com:  0.480D+00
 Coeff-En:   0.000D+00 0.000D+00 0.000D+00 0.000D+00 0.000D+00 0.000D+00
 Coeff-En:   0.100D+01
 Coeff:      0.610D-03-0.102D-02 0.900D-01-0.231D-01 0.194D+00 0.258D+00
 Coeff:      0.482D+00
 Gap=     0.160 Goal=   None    Shift=    0.000
 RMSDP=2.61D-05 MaxDP=5.97D-04 DE=-1.07D-04 OVMax= 7.91D-04

 Cycle   8  Pass 1  IDiag  1:
 E= -283.784685506675     Delta-E=       -0.000006068815 Rises=F Damp=F
 DIIS: error= 6.65D-05 at cycle   8 NSaved=   8.
 NSaved= 8 IEnMin= 8 EnMin= -283.784685506675     IErMin= 8 ErrMin= 6.65D-05
 ErrMax= 6.65D-05 EMaxC= 1.00D-01 BMatC= 4.16D-07 BMatP= 7.72D-06
 IDIUse=1 WtCom= 1.00D+00 WtEn= 0.00D+00
 Coeff-Com: -0.123D-03 0.378D-03 0.754D-02-0.411D-02 0.187D-01 0.208D-01
 Coeff-Com:  0.155D+00 0.801D+00
 Coeff:     -0.123D-03 0.378D-03 0.754D-02-0.411D-02 0.187D-01 0.208D-01
 Coeff:      0.155D+00 0.801D+00
 Gap=     0.160 Goal=   None    Shift=    0.000
 RMSDP=6.21D-06 MaxDP=1.07D-04 DE=-6.07D-06 OVMax= 1.85D-04

 Cycle   9  Pass 1  IDiag  1:
 E= -283.784685875454     Delta-E=       -0.000000368779 Rises=F Damp=F
 DIIS: error= 1.38D-05 at cycle   9 NSaved=   9.
 NSaved= 9 IEnMin= 9 EnMin= -283.784685875454     IErMin= 9 ErrMin= 1.38D-05
 ErrMax= 1.38D-05 EMaxC= 1.00D-01 BMatC= 2.86D-08 BMatP= 4.16D-07
 IDIUse=1 WtCom= 1.00D+00 WtEn= 0.00D+00
 Coeff-Com: -0.391D-04 0.778D-04-0.995D-03-0.209D-03-0.275D-02-0.605D-02
 Coeff-Com:  0.403D-01 0.369D+00 0.600D+00
 Coeff:     -0.391D-04 0.778D-04-0.995D-03-0.209D-03-0.275D-02-0.605D-02
 Coeff:      0.403D-01 0.369D+00 0.600D+00
 Gap=     0.160 Goal=   None    Shift=    0.000
 RMSDP=1.85D-06 MaxDP=3.25D-05 DE=-3.69D-07 OVMax= 5.17D-05

 Cycle  10  Pass 1  IDiag  1:
 E= -283.784685902846     Delta-E=       -0.000000027392 Rises=F Damp=F
 DIIS: error= 2.04D-06 at cycle  10 NSaved=  10.
 NSaved=10 IEnMin=10 EnMin= -283.784685902846     IErMin=10 ErrMin= 2.04D-06
 ErrMax= 2.04D-06 EMaxC= 1.00D-01 BMatC= 8.64D-10 BMatP= 2.86D-08
 IDIUse=1 WtCom= 1.00D+00 WtEn= 0.00D+00
 Coeff-Com:  0.846D-05-0.285D-04-0.461D-03 0.226D-03-0.146D-02-0.249D-02
 Coeff-Com: -0.151D-02 0.396D-01 0.173D+00 0.793D+00
 Coeff:      0.846D-05-0.285D-04-0.461D-03 0.226D-03-0.146D-02-0.249D-02
 Coeff:     -0.151D-02 0.396D-01 0.173D+00 0.793D+00
 Gap=     0.160 Goal=   None    Shift=    0.000
 RMSDP=3.51D-07 MaxDP=5.99D-06 DE=-2.74D-08 OVMax= 7.68D-06

 Cycle  11  Pass 1  IDiag  1:
 E= -283.784685903714     Delta-E=       -0.000000000868 Rises=F Damp=F
 DIIS: error= 4.01D-07 at cycle  11 NSaved=  11.
 NSaved=11 IEnMin=11 EnMin= -283.784685903714     IErMin=11 ErrMin= 4.01D-07
 ErrMax= 4.01D-07 EMaxC= 1.00D-01 BMatC= 2.42D-11 BMatP= 8.64D-10
 IDIUse=1 WtCom= 1.00D+00 WtEn= 0.00D+00
 Coeff-Com: -0.703D-06-0.237D-07-0.501D-04 0.206D-04-0.887D-04-0.815D-05
 Coeff-Com: -0.206D-03-0.939D-03 0.551D-02 0.652D-01 0.931D+00
 Coeff:     -0.703D-06-0.237D-07-0.501D-04 0.206D-04-0.887D-04-0.815D-05
 Coeff:     -0.206D-03-0.939D-03 0.551D-02 0.652D-01 0.931D+00
 Gap=     0.160 Goal=   None    Shift=    0.000
 RMSDP=4.88D-08 MaxDP=9.45D-07 DE=-8.68D-10 OVMax= 1.45D-06

 Cycle  12  Pass 1  IDiag  1:
 E= -283.784685903737     Delta-E=       -0.000000000023 Rises=F Damp=F
 DIIS: error= 5.29D-08 at cycle  12 NSaved=  12.
 NSaved=12 IEnMin=12 EnMin= -283.784685903737     IErMin=12 ErrMin= 5.29D-08
 ErrMax= 5.29D-08 EMaxC= 1.00D-01 BMatC= 2.89D-13 BMatP= 2.42D-11
 IDIUse=1 WtCom= 1.00D+00 WtEn= 0.00D+00
 Coeff-Com: -0.601D-06 0.131D-05-0.603D-05-0.995D-06 0.942D-05 0.505D-04
 Coeff-Com: -0.450D-04-0.119D-02-0.319D-02-0.593D-02 0.209D+00 0.801D+00
 Coeff:     -0.601D-06 0.131D-05-0.603D-05-0.995D-06 0.942D-05 0.505D-04
 Coeff:     -0.450D-04-0.119D-02-0.319D-02-0.593D-02 0.209D+00 0.801D+00
 Gap=     0.160 Goal=   None    Shift=    0.000
 RMSDP=8.70D-09 MaxDP=1.61D-07 DE=-2.29D-11 OVMax= 1.73D-07

 Error on total polarization charges =  0.02603
 SCF Done:  E(RM06L) =  -283.784685904     A.U. after   12 cycles
             Convg  =    0.8700D-08             -V/T =  2.0077
 KE= 2.816038951569D+02 PE=-9.942724078989D+02 EE= 2.696557947668D+02
 SMD-CDS (non-electrostatic) energy       (kcal/mol) =       3.05
 (included in total energy above)
 Leave Link  502 at Thu Apr 27 10:49:57 2023, MaxMem=   33554432 cpu:      81.9
 (Enter /local/share/g09/l801.exe)
 Range of M.O.s used for correlation:     1    95
 NBasis=    95 NAE=    20 NBE=    20 NFC=     0 NFV=     0
 NROrb=     95 NOA=    20 NOB=    20 NVA=    75 NVB=    75
 Leave Link  801 at Thu Apr 27 10:49:57 2023, MaxMem=   33554432 cpu:       0.2
 (Enter /local/share/g09/linda-exe/l1101.exel)
 Using compressed storage, NAtomX=     9.
 Will process  10 centers per pass.
 Leave Link 1101 at Thu Apr 27 10:50:00 2023, MaxMem=   33554432 cpu:       2.1
 (Enter /local/share/g09/l1102.exe)
 Symmetrizing basis deriv contribution to polar:
 IMax=3 JMax=2 DiffMx= 0.00D+00
 Leave Link 1102 at Thu Apr 27 10:50:01 2023, MaxMem=   33554432 cpu:       0.4
 (Enter /local/share/g09/linda-exe/l1110.exel)
 Forming Gx(P) for the SCF density, NAtomX=     9.
 Integral derivatives from FoFDir/FoFCou, PRISM(SPDF).
 Do as many integral derivatives as possible in FoFDir.
 G2DrvN: MDV=      33554256.
 G2DrvN: will do    10 centers at a time, making    1 passes doing MaxLOS=2.
 Calling FoFCou, ICntrl=  3507 FMM=F I1Cent=   0 AccDes= 1.00D-11.
 FoFCou: FMM=F IPFlag=           0 FMFlag=      100000 FMFlg1=           0
         NFxFlg=           0 DoJE=F BraDBF=F KetDBF=F FulRan=T
         Omega=  0.000000  0.000000  1.000000  0.000000  0.000000 ICntrl=    3507 IOpCl=  0
         NMat0=    1 NMatS0=    1 NMatT0=    0 NMatD0=    1 NMtDS0=    0 NMtDT0=    0
         I1Cent=           0 NGrid=           0.
 Symmetry not used in FoFCou.
 FoFDir/FoFCou used for L=0 through L=2.
 G2PCM: DoFxE=T DoFxN=T DoGrad=T DoPD/DQ/DG=FFF NFrqRd=   0 IEInf=0 DoCFld=F IF1Alg=4.
 GePol: Maximum number of non-zero 1st derivatives   =     246
 End of G2Drv Frequency-dependent properties file   721 does not exist.
 End of G2Drv Frequency-dependent properties file   722 does not exist.
 Leave Link 1110 at Thu Apr 27 10:50:53 2023, MaxMem=   33554432 cpu:      50.8
 (Enter /local/share/g09/linda-exe/l1002.exel)
 Minotr:  Closed shell wavefunction.
          IDoAtm=111111111
 NEqPCM:  Using equilibrium solvation (IEInf=0, Eps=  78.3553, EpsInf=   1.7778)
          Direct CPHF calculation.
          Differentiating once with respect to nuclear coordinates.
          Requested convergence is 1.0D-06 RMS, and 1.0D-05 maximum.
          Secondary convergence is 1.0D-12 RMS, and 1.0D-12 maximum.
          NewPWx=T KeepS1=F KeepF1=F KeepIn=T MapXYZ=F SortEE=F KeepMc=T.
          MDV=      33554338 using IRadAn=       1.
 Generate precomputed XC quadrature information.
          Keep J ints in memory in canonical form, NReq=11222695.
 Symmetry not used in FoFDir.
 MinBra= 0 MaxBra= 2 Meth= 1.
 IRaf=       0 NMat=   1 IRICut=       1 DoRegI=T DoRafI=F ISym2E= 0 JSym2E=0.
          Solving linear equations simultaneously, MaxMat=       0.
          There are    30 degrees of freedom in the 1st order CPHF.  IDoFFX=5.
     24 vectors produced by pass  0 Test12= 5.00D-11 3.33D-07 XBig12= 2.29D-01 1.88D-01.
 AX will form    24 AO Fock derivatives at one time.
     24 vectors produced by pass  1 Test12= 5.00D-11 3.33D-07 XBig12= 1.36D-01 1.79D-01.
     24 vectors produced by pass  2 Test12= 5.00D-11 3.33D-07 XBig12= 1.13D-03 7.64D-03.
     24 vectors produced by pass  3 Test12= 5.00D-11 3.33D-07 XBig12= 1.08D-05 7.53D-04.
     13 vectors produced by pass  4 Test12= 5.00D-11 3.33D-07 XBig12= 2.84D-08 3.41D-05.
      2 vectors produced by pass  5 Test12= 5.00D-11 3.33D-07 XBig12= 2.90D-11 7.39D-07.
 Inverted reduced A of dimension   111 with in-core refinement.
 End of Minotr Frequency-dependent properties file   721 does not exist.
 End of Minotr Frequency-dependent properties file   722 does not exist.
 Leave Link 1002 at Thu Apr 27 10:51:40 2023, MaxMem=   33554432 cpu:      45.9
 (Enter /local/share/g09/l601.exe)
 Copying SCF densities to generalized density rwf, IOpCl= 0 IROHF=0.

 **********************************************************************

            Population analysis using the SCF density.

 **********************************************************************

 Alpha  occ. eigenvalues --  -18.97007 -18.92318 -14.13902 -10.08856 -10.06540
 Alpha  occ. eigenvalues --   -0.97554  -0.82119  -0.73456  -0.69084  -0.44620
 Alpha  occ. eigenvalues --   -0.41707  -0.38464  -0.36954  -0.32289  -0.30265
 Alpha  occ. eigenvalues --   -0.28213  -0.25914  -0.24832  -0.16372  -0.12459
 Alpha virt. eigenvalues --    0.03535   0.04904   0.07831   0.13298   0.17981
 Alpha virt. eigenvalues --    0.18682   0.19926   0.26061   0.35529   0.55916
 Alpha virt. eigenvalues --    0.59870   0.60308   0.63933   0.66219   0.68985
 Alpha virt. eigenvalues --    0.75151   0.79469   0.80396   0.82870   0.85904
 Alpha virt. eigenvalues --    0.86737   0.90146   0.91706   0.94860   0.96822
 Alpha virt. eigenvalues --    0.98021   1.04177   1.11439   1.14470   1.22767
 Alpha virt. eigenvalues --    1.30344   1.35508   1.39518   1.49669   1.53624
 Alpha virt. eigenvalues --    1.57606   1.58599   1.62534   1.69776   1.72371
 Alpha virt. eigenvalues --    1.73143   1.76052   1.90842   1.93848   1.98473
 Alpha virt. eigenvalues --    2.02265   2.03513   2.04760   2.08370   2.10472
 Alpha virt. eigenvalues --    2.24038   2.34373   2.34837   2.36132   2.43049
 Alpha virt. eigenvalues --    2.49254   2.63493   2.67415   2.72628   2.74886
 Alpha virt. eigenvalues --    2.85174   2.95987   3.01978   3.02977   3.12235
 Alpha virt. eigenvalues --    3.15353   3.34902   3.48614   3.51041   3.56871
 Alpha virt. eigenvalues --    3.65468   3.94172   4.16977   4.32930   4.73061
     Molecular Orbital Coefficients:
                           1         2         3         4         5
                           O         O         O         O         O
     Eigenvalues --   -18.97007 -18.92318 -14.13902 -10.08856 -10.06540
   1 1   C  1S          0.00001   0.00001   0.00005   0.99400  -0.00539
   2        2S          0.00004   0.00002  -0.00002   0.04043  -0.00035
   3        2PX         0.00000  -0.00003  -0.00039   0.00005   0.00039
   4        2PY         0.00001   0.00001  -0.00102  -0.00001   0.00023
   5        2PZ         0.00000   0.00000   0.00000   0.00000   0.00000
   6        3S          0.00016   0.00021   0.00278  -0.01001   0.00639
   7        3PX         0.00025  -0.00033   0.00179   0.00426  -0.00315
   8        3PY         0.00051  -0.00019   0.00325   0.00750  -0.00249
   9        3PZ         0.00000   0.00001   0.00000   0.00000   0.00001
  10        4XX        -0.00001  -0.00003  -0.00017  -0.00546  -0.00060
  11        4YY         0.00003   0.00000  -0.00120  -0.00413  -0.00061
  12        4ZZ         0.00000   0.00001   0.00010  -0.00572  -0.00011
  13        4XY         0.00001   0.00003  -0.00068   0.00117  -0.00056
  14        4XZ         0.00000   0.00000   0.00000   0.00000   0.00000
  15        4YZ         0.00000   0.00000   0.00000   0.00000   0.00000
  16 2   C  1S         -0.00001   0.00003   0.00001   0.00508   0.99439
  17        2S         -0.00003   0.00013  -0.00013  -0.00013   0.04037
  18        2PX         0.00000   0.00008   0.00017  -0.00048   0.00025
  19        2PY         0.00001  -0.00004   0.00017  -0.00050   0.00012
  20        2PZ         0.00000   0.00000   0.00000   0.00000   0.00001
  21        3S          0.00039  -0.00050   0.00163   0.00806  -0.02171
  22        3PX         0.00022  -0.00064   0.00085   0.00303  -0.00190
  23        3PY         0.00003   0.00002   0.00011   0.00248  -0.00140
  24        3PZ         0.00000  -0.00002   0.00000  -0.00004  -0.00002
  25        4XX         0.00000   0.00002   0.00030  -0.00075  -0.00417
  26        4YY        -0.00001   0.00004   0.00005  -0.00074  -0.00423
  27        4ZZ        -0.00001   0.00005   0.00002  -0.00030  -0.00414
  28        4XY         0.00000  -0.00002   0.00017  -0.00052  -0.00012
  29        4XZ         0.00000   0.00000   0.00000   0.00000   0.00000
  30        4YZ         0.00000   0.00000   0.00000   0.00000   0.00000
  31 3   N  1S          0.00001   0.00000   0.99403  -0.00036   0.00002
  32        2S          0.00003   0.00002   0.03139  -0.00035   0.00015
  33        2PX         0.00000   0.00000  -0.00067   0.00038  -0.00003
  34        2PY         0.00000  -0.00001  -0.00212   0.00087  -0.00021
  35        2PZ         0.00000   0.00000   0.00000   0.00000   0.00000
  36        3S         -0.00046   0.00008  -0.00544  -0.00595   0.00042
  37        3PX         0.00019   0.00005   0.00050   0.00033   0.00052
  38        3PY         0.00021   0.00000   0.00221   0.00259  -0.00012
  39        3PZ         0.00000   0.00000   0.00000   0.00000   0.00000
  40        4XX         0.00003   0.00001  -0.00488   0.00021  -0.00006
  41        4YY        -0.00002   0.00000  -0.00413  -0.00031   0.00028
  42        4ZZ         0.00002   0.00003  -0.00505   0.00021  -0.00001
  43        4XY        -0.00001   0.00000   0.00042  -0.00002  -0.00008
  44        4XZ         0.00000   0.00000   0.00000   0.00000   0.00000
  45        4YZ         0.00000   0.00000   0.00000   0.00000   0.00000
  46 4   O  1S          0.00009   0.99370   0.00002  -0.00008  -0.00003
  47        2S          0.00002   0.02487   0.00008  -0.00035  -0.00007
  48        2PX         0.00015   0.00062   0.00001   0.00002   0.00015
  49        2PY         0.00010   0.00055   0.00002   0.00000   0.00001
  50        2PZ         0.00000   0.00000   0.00000   0.00000   0.00000
  51        3S          0.00005   0.00518  -0.00026   0.00170   0.00011
  52        3PX         0.00010  -0.00062  -0.00007  -0.00076  -0.00071
  53        3PY         0.00020  -0.00028  -0.00016   0.00044  -0.00024
  54        3PZ         0.00000   0.00000   0.00000   0.00000   0.00001
  55        4XX         0.00014  -0.00574   0.00006  -0.00007  -0.00002
  56        4YY         0.00009  -0.00573  -0.00001  -0.00026  -0.00018
  57        4ZZ        -0.00003  -0.00565   0.00007  -0.00020  -0.00013
  58        4XY         0.00016  -0.00019   0.00001  -0.00011  -0.00007
  59        4XZ         0.00000   0.00000   0.00000   0.00000   0.00000
  60        4YZ         0.00000   0.00000   0.00000   0.00000   0.00000
  61 5   H  1S         -0.00002   0.00009  -0.00003  -0.00024  -0.00040
  62        2S         -0.00002  -0.00001  -0.00011   0.00040   0.00320
  63        3PX        -0.00001   0.00004  -0.00001   0.00006   0.00010
  64        3PY         0.00001  -0.00001   0.00002   0.00013  -0.00020
  65        3PZ         0.00000   0.00001   0.00001  -0.00007   0.00035
  66 6   H  1S          0.00000  -0.00003   0.00002  -0.00017  -0.00048
  67        2S          0.00005  -0.00030   0.00018   0.00016   0.00287
  68        3PX         0.00000  -0.00002  -0.00001   0.00005  -0.00038
  69        3PY         0.00000   0.00001   0.00002  -0.00006   0.00023
  70        3PZ         0.00000   0.00000   0.00000   0.00000  -0.00001
  71 7   H  1S         -0.00002   0.00010  -0.00003  -0.00024  -0.00040
  72        2S         -0.00002  -0.00004  -0.00012   0.00035   0.00318
  73        3PX        -0.00001   0.00004  -0.00001   0.00006   0.00011
  74        3PY         0.00001  -0.00002   0.00002   0.00013  -0.00022
  75        3PZ         0.00000  -0.00001  -0.00001   0.00006  -0.00034
  76 8   O  1S          0.99370  -0.00012   0.00002   0.00002  -0.00003
  77        2S          0.02490   0.00004   0.00011   0.00009  -0.00015
  78        2PX        -0.00098  -0.00016  -0.00002   0.00001   0.00001
  79        2PY         0.00029  -0.00012   0.00003   0.00004   0.00001
  80        2PZ         0.00000   0.00000   0.00000   0.00000   0.00000
  81        3S          0.00551   0.00001  -0.00041  -0.00054   0.00070
  82        3PX         0.00036  -0.00018   0.00007   0.00014  -0.00030
  83        3PY         0.00043  -0.00008  -0.00019  -0.00021  -0.00025
  84        3PZ         0.00000   0.00000   0.00000   0.00000   0.00000
  85        4XX        -0.00571   0.00016   0.00006   0.00003  -0.00002
  86        4YY        -0.00549   0.00015   0.00009   0.00008  -0.00005
  87        4ZZ        -0.00561  -0.00002   0.00008   0.00004  -0.00012
  88        4XY        -0.00029   0.00011   0.00004   0.00003   0.00008
  89        4XZ         0.00000   0.00000   0.00000   0.00000   0.00000
  90        4YZ         0.00000   0.00000   0.00000   0.00000   0.00000
  91 9   H  1S         -0.00001  -0.00009   0.00005   0.00008   0.00001
  92        2S         -0.00094  -0.00003   0.00035   0.00048   0.00002
  93        3PX        -0.00023   0.00000  -0.00010  -0.00011   0.00000
  94        3PY         0.00037   0.00007   0.00003  -0.00001  -0.00001
  95        3PZ         0.00000   0.00000   0.00000   0.00000   0.00000
                           6         7         8         9        10
                           O         O         O         O         O
     Eigenvalues --    -0.97554  -0.82119  -0.73456  -0.69084  -0.44620
   1 1   C  1S         -0.01424  -0.15207  -0.00885  -0.03619  -0.11736
   2        2S          0.02591   0.28776   0.02247   0.07847   0.25334
   3        2PX         0.01347   0.04414  -0.02659  -0.13557  -0.12556
   4        2PY         0.00307   0.15280  -0.07793  -0.16720  -0.19906
   5        2PZ         0.00001   0.00013   0.00001   0.00016  -0.00001
   6        3S          0.00916   0.11145   0.01658   0.05259   0.26895
   7        3PX        -0.01463  -0.03370   0.00742  -0.00009  -0.02545
   8        3PY        -0.01622  -0.05797   0.00509   0.00391  -0.04597
   9        3PZ        -0.00002   0.00001  -0.00005   0.00006   0.00005
  10        4XX         0.00123  -0.00686   0.00156   0.00846  -0.00021
  11        4YY         0.00063   0.01092   0.00035   0.00206  -0.00469
  12        4ZZ        -0.00115  -0.01291   0.00033  -0.00107  -0.00353
  13        4XY         0.00066   0.01388   0.00008   0.01005   0.00407
  14        4XZ         0.00000   0.00000  -0.00001  -0.00003  -0.00001
  15        4YZ         0.00000   0.00000  -0.00001  -0.00003   0.00000
  16 2   C  1S         -0.00339  -0.04495  -0.04526  -0.17969   0.04647
  17        2S          0.00740   0.08517   0.08529   0.34508  -0.08410
  18        2PX         0.00354   0.02622   0.02028   0.02838   0.28470
  19        2PY         0.00141   0.03199   0.00470   0.02625   0.23683
  20        2PZ        -0.00001   0.00000  -0.00004   0.00018  -0.00088
  21        3S         -0.01292   0.02782   0.08516   0.33924  -0.13134
  22        3PX        -0.00215  -0.01548   0.01378   0.00674   0.10889
  23        3PY        -0.00565   0.00005   0.00248   0.00916   0.09080
  24        3PZ         0.00010   0.00011   0.00010  -0.00003  -0.00061
  25        4XX         0.00081   0.00205   0.00259   0.00062   0.00823
  26        4YY         0.00007   0.00495  -0.00037   0.00100   0.00489
  27        4ZZ         0.00002  -0.00107  -0.00060  -0.00069  -0.00738
  28        4XY         0.00010   0.00527   0.00061   0.00287   0.01805
  29        4XZ         0.00000   0.00001  -0.00001  -0.00001  -0.00007
  30        4YZ         0.00000  -0.00002   0.00000  -0.00001   0.00004
  31 3   N  1S         -0.01276  -0.17278   0.03479   0.06529   0.07009
  32        2S          0.02199   0.34628  -0.07018  -0.13484  -0.15097
  33        2PX         0.00205  -0.05944   0.00259   0.00590  -0.02882
  34        2PY        -0.01319  -0.15533   0.02226   0.04731  -0.04221
  35        2PZ         0.00000  -0.00007   0.00001   0.00007   0.00001
  36        3S          0.04280   0.37616  -0.08463  -0.15522  -0.22262
  37        3PX         0.00538  -0.01738  -0.00346  -0.00005  -0.01449
  38        3PY        -0.01067  -0.06394   0.00840   0.01732  -0.02716
  39        3PZ         0.00001  -0.00004   0.00002   0.00001  -0.00003
  40        4XX        -0.00012  -0.00621   0.00028   0.00437   0.00317
  41        4YY         0.00045   0.00659   0.00022  -0.00361   0.00630
  42        4ZZ        -0.00161  -0.00998   0.00227   0.00364   0.00164
  43        4XY        -0.00132   0.00613   0.00001   0.00028   0.00380
  44        4XZ         0.00000   0.00001   0.00000   0.00000   0.00000
  45        4YZ         0.00000   0.00001   0.00000  -0.00001   0.00000
  46 4   O  1S         -0.11623   0.00025  -0.18225   0.05682   0.00865
  47        2S          0.25803  -0.00045   0.40694  -0.12699  -0.02103
  48        2PX         0.06700  -0.02094  -0.01318  -0.01251  -0.07455
  49        2PY         0.06746   0.00014  -0.00638   0.00256   0.02098
  50        2PZ         0.00020  -0.00002  -0.00001   0.00000   0.00000
  51        3S          0.22172  -0.00120   0.47164  -0.15301  -0.02747
  52        3PX         0.02245  -0.00376  -0.00453  -0.00558  -0.04362
  53        3PY         0.02831   0.00210   0.00266  -0.00105   0.01331
  54        3PZ         0.00008  -0.00001   0.00001  -0.00004  -0.00002
  55        4XX         0.01023  -0.00140  -0.00040   0.00222  -0.00042
  56        4YY         0.01017   0.00096  -0.00366   0.00086   0.00103
  57        4ZZ        -0.00587   0.00040  -0.00589   0.00232   0.00034
  58        4XY         0.01420  -0.00275  -0.00147  -0.00027  -0.00463
  59        4XZ         0.00004  -0.00001   0.00000   0.00000  -0.00001
  60        4YZ         0.00005   0.00000   0.00001   0.00000   0.00000
  61 5   H  1S          0.00180   0.02081   0.02774   0.11137  -0.10914
  62        2S          0.00099   0.00126   0.00826   0.02202  -0.05989
  63        3PX         0.00017   0.00020   0.00085  -0.00008   0.00773
  64        3PY         0.00017   0.00104   0.00165   0.00613   0.00166
  65        3PZ        -0.00016  -0.00148  -0.00222  -0.00777   0.00602
  66 6   H  1S          0.00144   0.02176   0.02227   0.11042  -0.13331
  67        2S          0.00157  -0.00240   0.00575   0.02057  -0.07848
  68        3PX         0.00011   0.00231   0.00180   0.00935  -0.00188
  69        3PY         0.00003  -0.00020  -0.00072  -0.00349   0.00937
  70        3PZ         0.00000   0.00004   0.00004   0.00024  -0.00024
  71 7   H  1S          0.00186   0.02075   0.02811   0.11110  -0.10807
  72        2S          0.00112   0.00146   0.00855   0.02184  -0.05958
  73        3PX         0.00019   0.00013   0.00087  -0.00038   0.00794
  74        3PY         0.00018   0.00109   0.00176   0.00643   0.00146
  75        3PZ         0.00016   0.00144   0.00218   0.00750  -0.00580
  76 8   O  1S         -0.17804   0.02747   0.11501  -0.03622  -0.00176
  77        2S          0.40578  -0.06457  -0.26150   0.08335   0.00266
  78        2PX        -0.10095   0.00423  -0.03235   0.01735   0.00435
  79        2PY        -0.00192   0.00184  -0.13985   0.04815   0.07221
  80        2PZ        -0.00018   0.00001  -0.00020   0.00008   0.00012
  81        3S          0.34610  -0.06124  -0.30897   0.10095   0.01280
  82        3PX        -0.03389   0.00009  -0.00971   0.00828   0.00080
  83        3PY         0.00029   0.00312  -0.05803   0.02113   0.04201
  84        3PZ        -0.00006   0.00001  -0.00007   0.00005   0.00007
  85        4XX         0.01328  -0.00069   0.00932  -0.00343  -0.00098
  86        4YY         0.00688  -0.00145   0.00022  -0.00016  -0.00093
  87        4ZZ        -0.00452  -0.00004   0.00186   0.00003  -0.00021
  88        4XY         0.00970  -0.00170   0.01277  -0.00433  -0.00426
  89        4XZ         0.00004   0.00000   0.00003  -0.00001  -0.00001
  90        4YZ         0.00003   0.00000   0.00002  -0.00001  -0.00001
  91 9   H  1S          0.11391  -0.00404  -0.11682   0.03120   0.02591
  92        2S         -0.00049   0.00007  -0.01769   0.00251   0.00146
  93        3PX         0.00894  -0.00276  -0.00970   0.00427   0.00272
  94        3PY        -0.01675   0.00209   0.01162  -0.00353  -0.00204
  95        3PZ         0.00000   0.00000  -0.00001   0.00000   0.00000
                          11        12        13        14        15
                           O         O         O         O         O
     Eigenvalues --    -0.41707  -0.38464  -0.36954  -0.32289  -0.30265
   1 1   C  1S          0.02179  -0.00011   0.01236   0.02317   0.05966
   2        2S         -0.04767   0.00019  -0.02844  -0.04621  -0.12262
   3        2PX         0.15713   0.00091  -0.06965  -0.09852  -0.19729
   4        2PY        -0.07906  -0.00051   0.03197   0.01250  -0.20563
   5        2PZ        -0.00023   0.19716   0.00147   0.00115   0.00022
   6        3S         -0.03144   0.00035  -0.01748  -0.05513  -0.07535
   7        3PX         0.06210   0.00050  -0.01253  -0.04556  -0.01801
   8        3PY        -0.01664  -0.00018   0.02961   0.02308   0.06224
   9        3PZ        -0.00016   0.08413   0.00058   0.00025   0.00020
  10        4XX         0.00053  -0.00014   0.01346  -0.00399   0.00606
  11        4YY         0.00229  -0.00003  -0.01088   0.00857   0.01599
  12        4ZZ         0.00140   0.00012  -0.00084   0.00087   0.00227
  13        4XY         0.00367   0.00007  -0.00468  -0.00443   0.00599
  14        4XZ         0.00000  -0.00712   0.00001  -0.00001   0.00000
  15        4YZ         0.00003  -0.00419  -0.00008   0.00004   0.00003
  16 2   C  1S         -0.00099   0.00012   0.00060   0.00379  -0.01436
  17        2S          0.00053  -0.00030  -0.00347  -0.00818   0.03432
  18        2PX         0.08107   0.00257  -0.26377   0.00283   0.14034
  19        2PY        -0.18844  -0.00144   0.27469   0.03198   0.08962
  20        2PZ        -0.00045   0.41480   0.00271   0.00109  -0.00065
  21        3S          0.01044  -0.00006   0.00934  -0.02124   0.10637
  22        3PX         0.05230   0.00127  -0.11785   0.03201   0.09869
  23        3PY        -0.08454  -0.00071   0.13882   0.00853   0.05300
  24        3PZ        -0.00006   0.20474   0.00167   0.00183  -0.00070
  25        4XX        -0.00112  -0.00049   0.01018   0.00046  -0.00254
  26        4YY        -0.00606  -0.00047   0.00063   0.00169  -0.00018
  27        4ZZ         0.00569   0.00095  -0.01035  -0.00158  -0.00115
  28        4XY        -0.00239   0.00054  -0.00618  -0.00139   0.00379
  29        4XZ        -0.00027   0.00811   0.00066   0.00006  -0.00009
  30        4YZ         0.00030  -0.00901  -0.00069  -0.00005   0.00010
  31 3   N  1S         -0.00538   0.00002   0.01057  -0.03032  -0.09254
  32        2S          0.00654  -0.00001  -0.02543   0.07135   0.19926
  33        2PX         0.14062   0.00042   0.00304  -0.06340   0.10358
  34        2PY        -0.00006  -0.00039   0.01874   0.12324   0.43419
  35        2PZ        -0.00003   0.10578   0.00085   0.00091   0.00053
  36        3S          0.02950  -0.00025  -0.03870   0.10155   0.33731
  37        3PX         0.08428   0.00025   0.00827  -0.05020   0.06863
  38        3PY        -0.00458  -0.00015   0.01127   0.08764   0.29401
  39        3PZ         0.00003   0.05819   0.00050   0.00068   0.00034
  40        4XX        -0.00280  -0.00003   0.00473   0.00330   0.00496
  41        4YY         0.00144   0.00006  -0.00222  -0.01110  -0.03560
  42        4ZZ        -0.00131   0.00001  -0.00136   0.00275   0.00418
  43        4XY        -0.01325  -0.00002   0.00040   0.00482  -0.01066
  44        4XZ         0.00000  -0.00407  -0.00002  -0.00003  -0.00001
  45        4YZ         0.00001  -0.01113  -0.00009  -0.00009  -0.00004
  46 4   O  1S         -0.02413   0.00018  -0.02982  -0.05414   0.00817
  47        2S          0.04999  -0.00027   0.06664   0.09874  -0.01200
  48        2PX        -0.21240   0.00081  -0.07146  -0.18916   0.09249
  49        2PY        -0.00257   0.00072  -0.00017  -0.33112   0.05227
  50        2PZ        -0.00046   0.03601   0.00042  -0.00041   0.00024
  51        3S          0.09801  -0.00092   0.11322   0.27226  -0.04791
  52        3PX        -0.12453   0.00065  -0.04735  -0.10626   0.04868
  53        3PY         0.00441   0.00038   0.00492  -0.21519   0.03006
  54        3PZ        -0.00029   0.02725   0.00039  -0.00017   0.00011
  55        4XX        -0.01301   0.00010  -0.01109  -0.01516   0.00593
  56        4YY         0.00455   0.00008   0.00317  -0.02355   0.00349
  57        4ZZ         0.00034   0.00007  -0.00098  -0.00541   0.00106
  58        4XY        -0.00968   0.00004  -0.00293  -0.01462   0.00566
  59        4XZ        -0.00004  -0.00110  -0.00004  -0.00004   0.00002
  60        4YZ        -0.00001   0.00156   0.00002  -0.00003   0.00001
  61 5   H  1S          0.06946   0.21810  -0.11452  -0.01301  -0.01765
  62        2S          0.04858   0.15137  -0.07951   0.00198  -0.02338
  63        3PX         0.00259  -0.00021  -0.00600   0.00099   0.00327
  64        3PY        -0.00158   0.00892   0.00262   0.00015   0.00208
  65        3PZ        -0.00406  -0.00123   0.00597   0.00036   0.00103
  66 6   H  1S         -0.08855  -0.00838   0.23435   0.00492  -0.05244
  67        2S         -0.05246  -0.00589   0.17698   0.02392  -0.04278
  68        3PX        -0.00463  -0.00045   0.00720   0.00067   0.00122
  69        3PY        -0.00261   0.00016   0.00108   0.00104   0.00356
  70        3PZ        -0.00016   0.01025   0.00042   0.00003  -0.00007
  71 7   H  1S          0.07524  -0.20976  -0.12797  -0.01402  -0.01633
  72        2S          0.05248  -0.14581  -0.08884   0.00306  -0.02303
  73        3PX         0.00252   0.00071  -0.00566   0.00121   0.00325
  74        3PY        -0.00115  -0.00910   0.00183   0.00006   0.00208
  75        3PZ         0.00422  -0.00041  -0.00632  -0.00033  -0.00100
  76 8   O  1S          0.04340   0.00000   0.03735  -0.03535   0.01668
  77        2S         -0.09679   0.00002  -0.07921   0.06610  -0.02412
  78        2PX        -0.10500  -0.00036  -0.14195   0.40456  -0.13885
  79        2PY         0.34717  -0.00133   0.23183   0.16189  -0.04079
  80        2PZ         0.00013   0.02146   0.00029   0.00111  -0.00027
  81        3S         -0.17000   0.00000  -0.16061   0.15750  -0.10456
  82        3PX        -0.07021  -0.00023  -0.09318   0.28284  -0.08949
  83        3PY         0.20106  -0.00072   0.14020   0.08984  -0.03592
  84        3PZ         0.00006   0.01607   0.00019   0.00077  -0.00018
  85        4XX         0.00467   0.00005   0.00805  -0.03022   0.01177
  86        4YY         0.00591  -0.00002   0.00728  -0.00077   0.00606
  87        4ZZ         0.00116   0.00000   0.00148  -0.00030   0.00405
  88        4XY        -0.01939   0.00005  -0.01025  -0.00537   0.00240
  89        4XZ        -0.00001  -0.00153  -0.00001  -0.00008   0.00002
  90        4YZ        -0.00003   0.00012  -0.00001  -0.00001   0.00001
  91 9   H  1S          0.18891  -0.00050   0.13172  -0.01584   0.02664
  92        2S          0.10572  -0.00035   0.07597   0.03414   0.05094
  93        3PX         0.00457  -0.00005   0.00380   0.01231  -0.00189
  94        3PY        -0.00599   0.00002  -0.00509   0.00302   0.00074
  95        3PZ         0.00000   0.00124   0.00002   0.00004   0.00000
                          16        17        18        19        20
                           O         O         O         O         O
     Eigenvalues --    -0.28213  -0.25914  -0.24832  -0.16372  -0.12459
   1 1   C  1S         -0.00001   0.00002  -0.00809   0.01316   0.00001
   2        2S          0.00004  -0.00004   0.02133  -0.04247   0.00013
   3        2PX         0.00065  -0.00087   0.24301   0.02122   0.00016
   4        2PY        -0.00017   0.00119  -0.22934  -0.00651   0.00002
   5        2PZ         0.16726   0.31243   0.00114   0.00014   0.00772
   6        3S          0.00018  -0.00073   0.03332   0.06904   0.00058
   7        3PX         0.00016  -0.00080   0.14121   0.06138   0.00014
   8        3PY         0.00021  -0.00053  -0.11695   0.03875   0.00267
   9        3PZ         0.12636   0.16820   0.00071  -0.00011   0.05829
  10        4XX         0.00003  -0.00005   0.01605  -0.00849   0.00000
  11        4YY         0.00001   0.00004  -0.01378   0.00965   0.00009
  12        4ZZ        -0.00003  -0.00003   0.00161  -0.00138  -0.00001
  13        4XY         0.00000  -0.00011   0.02103  -0.02297   0.00000
  14        4XZ         0.00867   0.00724   0.00007   0.00000   0.00326
  15        4YZ         0.01262   0.02674   0.00005  -0.00001  -0.00615
  16 2   C  1S         -0.00005   0.00002  -0.00392   0.01703  -0.00015
  17        2S          0.00005   0.00007   0.00875  -0.04464  -0.00012
  18        2PX        -0.00011   0.00008  -0.06549  -0.07528   0.00041
  19        2PY        -0.00042  -0.00052   0.10643  -0.04656  -0.00065
  20        2PZ        -0.11367  -0.11413  -0.00045   0.00065  -0.03036
  21        3S          0.00043  -0.00100   0.03197  -0.05400   0.00350
  22        3PX         0.00043  -0.00102  -0.03762  -0.00338   0.00349
  23        3PY        -0.00099   0.00053   0.06262  -0.03543  -0.00382
  24        3PZ        -0.08638  -0.05074  -0.00080   0.00120  -0.06435
  25        4XX         0.00018   0.00014   0.01495   0.00656  -0.00002
  26        4YY         0.00017   0.00027  -0.01295  -0.00299   0.00003
  27        4ZZ        -0.00037  -0.00038  -0.00487  -0.00275  -0.00012
  28        4XY        -0.00019  -0.00016  -0.00411  -0.00348  -0.00006
  29        4XZ         0.00340   0.00598   0.00032   0.00007   0.00234
  30        4YZ         0.00952   0.01411  -0.00024  -0.00008   0.00176
  31 3   N  1S          0.00003   0.00014  -0.01853  -0.00808   0.00004
  32        2S         -0.00002  -0.00039   0.03579   0.01910   0.00018
  33        2PX         0.00037  -0.00179   0.41250  -0.21466  -0.00034
  34        2PY        -0.00049  -0.00070  -0.01513   0.14998  -0.00010
  35        2PZ         0.20418   0.38784   0.00153   0.00001  -0.05147
  36        3S         -0.00043   0.00020   0.11912  -0.01870  -0.00251
  37        3PX         0.00033  -0.00131   0.26408  -0.17764   0.00033
  38        3PY        -0.00025  -0.00076  -0.02447   0.14280   0.00066
  39        3PZ         0.13685   0.26354   0.00095   0.00007  -0.06927
  40        4XX        -0.00002   0.00004  -0.01572   0.00260   0.00005
  41        4YY         0.00006   0.00001   0.00802  -0.00732   0.00004
  42        4ZZ         0.00000  -0.00007   0.00103   0.00060   0.00007
  43        4XY        -0.00004   0.00012  -0.02356   0.00528  -0.00002
  44        4XZ        -0.00279  -0.00993  -0.00005  -0.00001   0.00064
  45        4YZ        -0.01445  -0.02573  -0.00010  -0.00001   0.00247
  46 4   O  1S          0.00014   0.00004   0.01594   0.00023   0.00000
  47        2S         -0.00033  -0.00006  -0.03585   0.00795  -0.00014
  48        2PX        -0.00042   0.00080  -0.07415  -0.38036  -0.00031
  49        2PY         0.00017   0.00029   0.04744   0.41179  -0.00120
  50        2PZ         0.29231  -0.16671  -0.00086   0.00022   0.53488
  51        3S         -0.00056  -0.00030  -0.06986  -0.00938   0.00036
  52        3PX        -0.00043   0.00053  -0.04614  -0.29982  -0.00045
  53        3PY         0.00010   0.00020   0.03200   0.33811  -0.00087
  54        3PZ         0.21980  -0.12704  -0.00065   0.00023   0.45631
  55        4XX         0.00000   0.00002   0.00515   0.00010  -0.00001
  56        4YY        -0.00001   0.00004  -0.00065   0.01076  -0.00006
  57        4ZZ         0.00004  -0.00003   0.00177   0.00374  -0.00006
  58        4XY        -0.00002   0.00008  -0.00717  -0.00101  -0.00001
  59        4XZ         0.00918  -0.00743  -0.00006  -0.00003  -0.00139
  60        4YZ         0.01105  -0.00449  -0.00005   0.00001   0.00144
  61 5   H  1S         -0.07515  -0.08907  -0.05693  -0.00586  -0.01471
  62        2S         -0.05119  -0.10206  -0.06070   0.00153   0.03754
  63        3PX         0.00160   0.00101  -0.00078  -0.00100   0.00218
  64        3PY        -0.00133  -0.00159   0.00225  -0.00104   0.00037
  65        3PZ         0.00000   0.00028   0.00244  -0.00025  -0.00050
  66 6   H  1S          0.00230   0.00219   0.10457   0.03746   0.00049
  67        2S          0.00234   0.00155   0.09773   0.09002   0.00261
  68        3PX         0.00008   0.00006   0.00049  -0.00120   0.00004
  69        3PY        -0.00007  -0.00010  -0.00092  -0.00172  -0.00001
  70        3PZ        -0.00268  -0.00333   0.00011   0.00007  -0.00052
  71 7   H  1S          0.07275   0.08700  -0.06139  -0.00694   0.01365
  72        2S          0.04846   0.10094  -0.06612   0.00006  -0.04285
  73        3PX        -0.00172  -0.00105  -0.00061  -0.00081  -0.00232
  74        3PY         0.00137   0.00170   0.00207  -0.00103  -0.00045
  75        3PZ        -0.00017   0.00008  -0.00257   0.00021  -0.00053
  76 8   O  1S         -0.00004   0.00009  -0.01766  -0.02505   0.00002
  77        2S          0.00007  -0.00014   0.02752   0.05183  -0.00002
  78        2PX        -0.00079  -0.00085   0.22538   0.10728   0.00036
  79        2PY        -0.00110   0.00064  -0.17545  -0.05108   0.00058
  80        2PZ         0.41956  -0.27814  -0.00178  -0.00042  -0.40630
  81        3S          0.00026  -0.00041   0.08866   0.14912  -0.00017
  82        3PX        -0.00064  -0.00062   0.16101   0.07813   0.00037
  83        3PY        -0.00077   0.00050  -0.12944  -0.01958   0.00049
  84        3PZ         0.32259  -0.20988  -0.00138  -0.00034  -0.34159
  85        4XX         0.00006   0.00003  -0.00867   0.00617  -0.00002
  86        4YY        -0.00003   0.00003  -0.00956  -0.01950   0.00007
  87        4ZZ        -0.00006   0.00003  -0.00189  -0.00063  -0.00002
  88        4XY         0.00004  -0.00002   0.00474   0.00345   0.00002
  89        4XZ        -0.01801   0.00973   0.00006   0.00002   0.00005
  90        4YZ         0.00229  -0.00080  -0.00001  -0.00003  -0.01601
  91 9   H  1S         -0.00023   0.00032  -0.08250  -0.10128   0.00016
  92        2S         -0.00020  -0.00004   0.00359  -0.13103  -0.00003
  93        3PX        -0.00005   0.00002  -0.00776  -0.00033   0.00003
  94        3PY         0.00000  -0.00003   0.00831  -0.00071   0.00000
  95        3PZ         0.01355  -0.00573  -0.00005  -0.00002  -0.01234
                          21        22        23        24        25
                           V         V         V         V         V
     Eigenvalues --     0.03535   0.04904   0.07831   0.13298   0.17981
   1 1   C  1S         -0.00054  -0.05472   0.03250   0.02585   0.05422
   2        2S          0.00066   0.10412  -0.07251   0.01301  -0.07114
   3        2PX         0.00142   0.36359  -0.12712   0.01883  -0.05123
   4        2PY        -0.00152  -0.29467   0.12917   0.02060   0.10201
   5        2PZ        -0.47286   0.00117  -0.00579  -0.00178   0.00623
   6        3S          0.00682   0.45890  -0.34397  -0.72107  -0.84709
   7        3PX         0.00101   0.37386  -0.00916  -0.05490  -0.14787
   8        3PY        -0.00198  -0.23290   0.26089  -0.29701   0.26366
   9        3PZ        -0.52454   0.00147  -0.00961  -0.00461   0.01651
  10        4XX        -0.00026  -0.02604   0.00515   0.00613  -0.00282
  11        4YY        -0.00015   0.01308  -0.00018   0.01641   0.03056
  12        4ZZ         0.00024   0.00482  -0.00464  -0.00957  -0.01349
  13        4XY        -0.00003  -0.01036   0.00234   0.01249   0.00638
  14        4XZ         0.01920   0.00012   0.00009   0.00001   0.00122
  15        4YZ         0.02654  -0.00018   0.00028   0.00000  -0.00048
  16 2   C  1S          0.00025   0.03352   0.01041  -0.14523   0.00140
  17        2S         -0.00063  -0.06669  -0.03749   0.25650   0.00468
  18        2PX        -0.00123  -0.02080   0.03342  -0.03818   0.43128
  19        2PY        -0.00121  -0.11196   0.09403  -0.11577  -0.16353
  20        2PZ        -0.04865   0.00027   0.00269   0.00265  -0.01593
  21        3S         -0.00210  -0.29770  -0.06398   1.99944  -0.12431
  22        3PX        -0.00301   0.06845   0.27535  -0.16483   1.21076
  23        3PY        -0.00168  -0.21685   0.19485  -0.42592  -0.47915
  24        3PZ        -0.22004   0.00013   0.01064   0.01023  -0.04840
  25        4XX        -0.00033   0.03586  -0.00532   0.00333   0.00821
  26        4YY        -0.00058  -0.02426   0.00722  -0.00645   0.00406
  27        4ZZ         0.00084  -0.00928  -0.00077  -0.01196  -0.00868
  28        4XY         0.00044  -0.00021  -0.00817  -0.00054  -0.02385
  29        4XZ        -0.02146   0.00054  -0.00036   0.00008   0.00183
  30        4YZ        -0.03576  -0.00044  -0.00039  -0.00035  -0.00163
  31 3   N  1S          0.00018   0.00334  -0.01152  -0.03599  -0.01944
  32        2S         -0.00043  -0.02064   0.03327   0.06913   0.06065
  33        2PX        -0.00169  -0.24875   0.11926  -0.02946   0.01762
  34        2PY         0.00137   0.17530  -0.08347  -0.05719  -0.12731
  35        2PZ         0.42238  -0.00062   0.00445   0.00161  -0.00289
  36        3S         -0.00138  -0.03287  -0.02129   0.59505   0.14456
  37        3PX        -0.00196  -0.31542   0.17618  -0.07206   0.03423
  38        3PY         0.00190   0.21986  -0.09208  -0.27474  -0.20281
  39        3PZ         0.53525  -0.00108   0.00710   0.00254  -0.00859
  40        4XX        -0.00005  -0.01376   0.00386  -0.00910   0.00678
  41        4YY        -0.00002   0.00122  -0.00017   0.00597  -0.00010
  42        4ZZ         0.00008  -0.00028  -0.00183  -0.00773  -0.00096
  43        4XY         0.00000  -0.01033   0.00192   0.00231   0.00162
  44        4XZ         0.00526   0.00001   0.00004   0.00000   0.00019
  45        4YZ         0.00849  -0.00005   0.00013   0.00006  -0.00029
  46 4   O  1S         -0.00044   0.04492   0.04432  -0.00518  -0.01221
  47        2S          0.00125  -0.12222  -0.12847   0.03170   0.02559
  48        2PX         0.00297   0.06338  -0.43416  -0.09436   0.05592
  49        2PY         0.00099  -0.27778  -0.24641  -0.04831   0.09761
  50        2PZ         0.06694  -0.00180   0.00061  -0.00119  -0.00662
  51        3S          0.00232  -0.25768  -0.27750  -0.01998   0.11871
  52        3PX         0.00339   0.03791  -0.50605  -0.07927   0.04129
  53        3PY         0.00135  -0.31288  -0.31030  -0.01912   0.14014
  54        3PZ         0.05903  -0.00139   0.00022  -0.00127  -0.00287
  55        4XX        -0.00004   0.00593  -0.00149   0.00633   0.00433
  56        4YY         0.00000  -0.00443  -0.00583   0.00987  -0.00265
  57        4ZZ         0.00011  -0.00562  -0.00919   0.00220  -0.00419
  58        4XY        -0.00019  -0.00621   0.01431   0.00145   0.00460
  59        4XZ         0.00372  -0.00010   0.00013  -0.00009  -0.00074
  60        4YZ        -0.00332  -0.00002   0.00000  -0.00009  -0.00009
  61 5   H  1S          0.13228  -0.05147   0.00422  -0.08717  -0.02262
  62        2S          0.41875  -0.10808   0.18366  -1.13497  -0.39738
  63        3PX        -0.00510   0.00099   0.00413  -0.00139   0.01678
  64        3PY        -0.00612  -0.00060  -0.00043   0.00291  -0.00422
  65        3PZ         0.00022  -0.00140   0.00159  -0.01136  -0.00712
  66 6   H  1S         -0.00375   0.12925   0.00836  -0.02028   0.15791
  67        2S         -0.01297   0.52059   0.14603  -0.72235   1.74539
  68        3PX         0.00013  -0.00880   0.00259   0.00508  -0.00939
  69        3PY         0.00004  -0.00708   0.00502  -0.00946   0.01226
  70        3PZ        -0.00106  -0.00005   0.00011   0.00029  -0.00163
  71 7   H  1S         -0.12848  -0.05653   0.00388  -0.08874  -0.03658
  72        2S         -0.40621  -0.12644   0.20101  -1.13140  -0.56484
  73        3PX         0.00476   0.00108   0.00494  -0.00148   0.01566
  74        3PY         0.00596  -0.00030  -0.00059   0.00350  -0.00252
  75        3PZ         0.00013   0.00150  -0.00137   0.01116   0.00815
  76 8   O  1S          0.00046  -0.02939  -0.06658  -0.02357   0.01389
  77        2S         -0.00117   0.05987   0.16072   0.05077  -0.02214
  78        2PX         0.00248  -0.18478  -0.31848  -0.06367   0.04269
  79        2PY         0.00244  -0.01152  -0.28111   0.02436   0.02055
  80        2PZ        -0.02304   0.00007  -0.00121   0.00033   0.00127
  81        3S         -0.00329   0.26946   0.51847   0.23246  -0.14992
  82        3PX         0.00309  -0.23195  -0.43631  -0.10714   0.09150
  83        3PY         0.00233  -0.01595  -0.29696   0.06582   0.02900
  84        3PZ        -0.01499  -0.00010  -0.00137   0.00023   0.00089
  85        4XX        -0.00004  -0.00849   0.00221  -0.00267   0.00250
  86        4YY         0.00013  -0.00370  -0.01696  -0.00583   0.00802
  87        4ZZ        -0.00003  -0.00509   0.00114  -0.00401   0.00306
  88        4XY         0.00016  -0.00829  -0.02165  -0.00526   0.00571
  89        4XZ        -0.00074   0.00001  -0.00004   0.00004   0.00020
  90        4YZ        -0.00142   0.00004  -0.00011   0.00003   0.00030
  91 9   H  1S          0.00015  -0.00885  -0.01501  -0.03458   0.01148
  92        2S          0.00140  -0.24311  -0.24983  -0.32147   0.11484
  93        3PX         0.00012  -0.00056  -0.01261  -0.00187   0.00264
  94        3PY         0.00002  -0.00838  -0.00363  -0.00207   0.00284
  95        3PZ         0.00175   0.00001  -0.00002   0.00001   0.00009
                          26        27        28        29        30
                           V         V         V         V         V
     Eigenvalues --     0.18682   0.19926   0.26061   0.35529   0.55916
   1 1   C  1S         -0.00022  -0.04315  -0.10128   0.00874   0.00009
   2        2S         -0.00125   0.05281   0.16658   0.13859   0.00216
   3        2PX         0.00296  -0.12748  -0.33365  -0.16195   0.00055
   4        2PY        -0.00028  -0.01054  -0.06898  -0.11649  -0.00326
   5        2PZ         0.19130   0.00536   0.00066  -0.00006  -0.77041
   6        3S         -0.00222   1.18669   1.93753  -1.45154  -0.01144
   7        3PX         0.01588  -0.29199  -1.06059  -1.98034  -0.00347
   8        3PY        -0.00923   0.25000  -0.49114  -3.84267   0.00519
   9        3PZ         0.49825   0.01373   0.00164   0.00094   0.60816
  10        4XX        -0.00034  -0.00188   0.00661   0.01742   0.00074
  11        4YY        -0.00151   0.00280  -0.01509   0.02863   0.00073
  12        4ZZ         0.00082   0.00247   0.00983  -0.01373  -0.00052
  13        4XY         0.00061  -0.01970  -0.00431   0.02288  -0.00058
  14        4XZ         0.01806   0.00067   0.00017  -0.00015  -0.01389
  15        4YZ        -0.00106  -0.00014  -0.00018   0.00013  -0.01690
  16 2   C  1S         -0.00107   0.00559   0.07476   0.04588   0.00001
  17        2S          0.00102  -0.01148  -0.07435   0.15931  -0.00012
  18        2PX        -0.01469  -0.09790  -0.03317   0.17006  -0.00132
  19        2PY         0.01126  -0.21762  -0.23986   0.28599  -0.00053
  20        2PZ        -0.45483  -0.01211   0.00097  -0.00185  -0.42135
  21        3S          0.01830   0.06410  -1.48333  -2.93923   0.00379
  22        3PX        -0.03447  -0.17562  -0.79504  -1.72213   0.00397
  23        3PY         0.03321  -0.74849  -1.34332  -0.88668   0.00042
  24        3PZ        -1.33243  -0.03411   0.00218   0.00328   0.83440
  25        4XX        -0.00116   0.00045   0.00127   0.04368   0.00255
  26        4YY        -0.00119   0.01100   0.03272  -0.00563   0.00249
  27        4ZZ         0.00208  -0.01555  -0.02214   0.00247  -0.00471
  28        4XY         0.00126   0.01329   0.03971   0.01318  -0.00252
  29        4XZ         0.02050   0.00074   0.00021   0.00001  -0.04204
  30        4YZ        -0.01187  -0.00063  -0.00031  -0.00037   0.04611
  31 3   N  1S         -0.00123   0.06543   0.00738  -0.10020  -0.00021
  32        2S          0.00306  -0.15075  -0.04165   0.10849  -0.00022
  33        2PX         0.00243  -0.10879   0.29146  -0.19139   0.00159
  34        2PY         0.00255   0.04789   0.07806  -0.02867   0.00052
  35        2PZ        -0.12211  -0.00315   0.00036  -0.00065  -0.19946
  36        3S          0.01037  -0.78149   0.11597   3.94006   0.00355
  37        3PX         0.00140   0.00825   0.52133  -0.54505  -0.00113
  38        3PY        -0.00084   0.34444  -0.01372  -1.62838  -0.00484
  39        3PZ        -0.26369  -0.00720  -0.00064  -0.00168   0.14715
  40        4XX        -0.00081   0.02436  -0.00549  -0.01304  -0.00006
  41        4YY         0.00070  -0.02263  -0.00681   0.00920  -0.00018
  42        4ZZ         0.00014   0.00528   0.00223  -0.03838  -0.00012
  43        4XY         0.00006   0.00090   0.00830   0.02319  -0.00022
  44        4XZ         0.00039   0.00007   0.00004   0.00001   0.01943
  45        4YZ        -0.00825  -0.00027  -0.00005   0.00004   0.06088
  46 4   O  1S         -0.00027   0.01960  -0.01221   0.00130  -0.00013
  47        2S          0.00191  -0.06649   0.05357   0.03145  -0.00338
  48        2PX        -0.00625  -0.11379  -0.00887  -0.04443   0.00436
  49        2PY        -0.00573  -0.05961  -0.00701   0.03282   0.00219
  50        2PZ        -0.09541  -0.00419  -0.00139   0.00092  -0.10777
  51        3S         -0.00237  -0.11728   0.05300  -0.13447   0.00622
  52        3PX        -0.00530  -0.13108   0.00384   0.08049  -0.00609
  53        3PY        -0.00637  -0.08922   0.04294   0.03861  -0.00113
  54        3PZ        -0.04626  -0.00211  -0.00021   0.00012   0.00916
  55        4XX        -0.00023   0.00224   0.00237   0.01055  -0.00143
  56        4YY         0.00039  -0.00794   0.01153   0.01077  -0.00164
  57        4ZZ         0.00057  -0.00591   0.00569   0.00926  -0.00152
  58        4XY        -0.00006  -0.00306   0.00196   0.01088  -0.00048
  59        4XZ        -0.00977  -0.00042  -0.00017   0.00020  -0.01892
  60        4YZ         0.00037  -0.00005  -0.00003   0.00008   0.00583
  61 5   H  1S          0.11088  -0.04808  -0.05517  -0.04445  -0.29060
  62        2S          1.43611  -0.43023  -0.27499   0.30109  -0.17437
  63        3PX         0.00742  -0.00618  -0.01103   0.00419   0.00447
  64        3PY        -0.01051  -0.00681  -0.01428   0.00176   0.00740
  65        3PZ         0.00433  -0.00818  -0.00828   0.00882   0.02420
  66 6   H  1S         -0.00813  -0.01671  -0.06291   0.03060   0.00957
  67        2S         -0.10911   0.10502   0.39306  -0.25794   0.00443
  68        3PX         0.00116  -0.00092  -0.01035  -0.01530  -0.00029
  69        3PY        -0.00087  -0.00684  -0.00994  -0.01342   0.00003
  70        3PZ        -0.02121  -0.00057  -0.00018   0.00004   0.03001
  71 7   H  1S         -0.10475  -0.05471  -0.05469  -0.04830   0.28085
  72        2S         -1.34680  -0.52337  -0.29444   0.31756   0.16819
  73        3PX        -0.00877  -0.00692  -0.01168   0.00512  -0.00404
  74        3PY         0.01167  -0.00585  -0.01394   0.00222  -0.00759
  75        3PZ         0.00196   0.00844   0.00854  -0.00882   0.02469
  76 8   O  1S         -0.00270   0.05015  -0.03638   0.01498  -0.00004
  77        2S          0.00516  -0.08731   0.08981  -0.03699  -0.00137
  78        2PX        -0.00496   0.01839  -0.03626  -0.02217   0.00088
  79        2PY         0.00605  -0.33538   0.15053  -0.09414   0.00113
  80        2PZ         0.01072   0.00029   0.00031  -0.00030  -0.04908
  81        3S          0.03093  -0.66888   0.40244  -0.25322   0.00378
  82        3PX        -0.01188   0.14213  -0.13908   0.03131  -0.00176
  83        3PY         0.01093  -0.53354   0.25757  -0.10813  -0.00208
  84        3PZ         0.00714   0.00006   0.00006  -0.00001   0.02621
  85        4XX        -0.00024   0.00473   0.00343  -0.00964  -0.00011
  86        4YY        -0.00095   0.01426  -0.00489   0.00744  -0.00021
  87        4ZZ        -0.00060   0.02054  -0.00497  -0.00372  -0.00060
  88        4XY        -0.00039  -0.00782   0.00216  -0.00417   0.00073
  89        4XZ         0.00172   0.00006   0.00007  -0.00008  -0.00394
  90        4YZ         0.00392   0.00014   0.00007  -0.00005   0.00999
  91 9   H  1S         -0.00538   0.17503  -0.10785   0.06284  -0.00018
  92        2S         -0.04697   1.38214  -0.77226   0.59878   0.00033
  93        3PX        -0.00021  -0.00009  -0.00224   0.00416   0.00014
  94        3PY        -0.00031   0.00630  -0.00282   0.00667  -0.00006
  95        3PZ         0.00097   0.00005   0.00002   0.00000   0.01046
                          31        32        33        34        35
                           V         V         V         V         V
     Eigenvalues --     0.59870   0.60308   0.63933   0.66219   0.68985
   1 1   C  1S         -0.02346   0.04230   0.00127   0.04445  -0.00798
   2        2S         -0.28036   0.01171  -0.00655  -0.60048   0.05920
   3        2PX        -0.03460   0.31464   0.00440  -0.22749  -0.62546
   4        2PY        -0.27667   0.01484  -0.01702  -0.50155   0.49381
   5        2PZ        -0.00059  -0.00309   0.50752  -0.00771   0.00330
   6        3S         -1.51037   1.46100  -0.01312   0.50258   0.60827
   7        3PX        -0.41658   0.34593  -0.00126   1.10974   1.88947
   8        3PY        -1.52539   0.71184   0.03987   2.15461   0.23147
   9        3PZ         0.00007   0.00330  -1.15621   0.02009  -0.01151
  10        4XX        -0.03944   0.05766   0.00184   0.01017  -0.04220
  11        4YY        -0.09222   0.07769   0.00161   0.00755   0.00554
  12        4ZZ         0.01148  -0.04249  -0.00230  -0.06105   0.02328
  13        4XY        -0.06684   0.12740   0.00029   0.05314   0.00976
  14        4XZ        -0.00093  -0.00058  -0.01353   0.00097  -0.00135
  15        4YZ         0.00081   0.00034   0.05248  -0.00149   0.00077
  16 2   C  1S          0.00701  -0.02157  -0.00045  -0.02243   0.00512
  17        2S         -0.09463   0.20795   0.00043   0.06509   0.02841
  18        2PX         0.18176   0.65677   0.00250   0.10401   0.29326
  19        2PY        -0.56197   0.23133   0.00633   0.43061  -0.14723
  20        2PZ        -0.00159  -0.00399  -0.66025   0.01369  -0.00541
  21        3S         -0.51474   0.14509   0.02646   1.43515   0.67744
  22        3PX        -0.91122  -1.04295   0.00910   0.60284  -0.37332
  23        3PY         1.15668  -0.11940  -0.00888  -0.51733   0.89528
  24        3PZ         0.00338   0.00519   1.77470  -0.03951   0.01931
  25        4XX        -0.03339  -0.05119   0.00315   0.01326   0.02787
  26        4YY        -0.03317  -0.01589   0.00372   0.05216  -0.01449
  27        4ZZ         0.05641   0.06452  -0.00648  -0.04926   0.02049
  28        4XY         0.04823   0.01373  -0.00271   0.01956   0.01546
  29        4XZ        -0.00408  -0.00311  -0.06246   0.00307  -0.00108
  30        4YZ         0.00409   0.00306   0.04957  -0.00308   0.00226
  31 3   N  1S         -0.05946   0.03268  -0.00083  -0.02423   0.02645
  32        2S          0.07921  -0.12315  -0.00080  -0.02719  -0.10726
  33        2PX         0.06464  -0.05024   0.00438   0.01005  -0.28081
  34        2PY         0.32496  -0.28866  -0.00115   0.04759   0.08129
  35        2PZ        -0.00264  -0.00209   0.27940  -0.00288   0.00295
  36        3S          2.00292  -1.13478  -0.00818  -1.28206  -0.85597
  37        3PX        -0.56140   0.14082  -0.00608  -0.08344   0.29923
  38        3PY        -1.47547   1.04347  -0.01167  -0.17793   0.68072
  39        3PZ         0.00112   0.00199   0.01635  -0.00162   0.00105
  40        4XX         0.02771  -0.05043  -0.00020   0.00612  -0.00608
  41        4YY         0.04632  -0.06032  -0.00179  -0.09566  -0.02627
  42        4ZZ        -0.00546  -0.01288   0.00003   0.03594  -0.01288
  43        4XY         0.00933  -0.05998  -0.00224  -0.08834   0.03843
  44        4XZ        -0.00015  -0.00002  -0.02536   0.00055  -0.00040
  45        4YZ         0.00009   0.00029  -0.02336   0.00017   0.00009
  46 4   O  1S         -0.00619  -0.00896  -0.00040  -0.00219   0.02084
  47        2S          0.10166   0.22391  -0.00707  -0.06929  -0.02778
  48        2PX        -0.15370  -0.20361   0.00732   0.06945  -0.05019
  49        2PY        -0.14923  -0.12794   0.00379   0.02712   0.02500
  50        2PZ         0.00398   0.00088   0.13982  -0.00594   0.00545
  51        3S         -0.10634  -0.25674   0.01499   0.07163  -0.39908
  52        3PX         0.15253   0.06035  -0.01433  -0.21060   0.13905
  53        3PY         0.13580   0.06675  -0.00198  -0.12829  -0.35699
  54        3PZ        -0.00265  -0.00090  -0.03450   0.00321  -0.00389
  55        4XX         0.02474   0.05099  -0.00333  -0.06511  -0.05879
  56        4YY         0.04819   0.08909  -0.00308  -0.02423  -0.00245
  57        4ZZ         0.02871   0.06584  -0.00323  -0.02096   0.04191
  58        4XY        -0.00773   0.01229  -0.00098  -0.03848  -0.04274
  59        4XZ         0.00056   0.00015   0.01295  -0.00077   0.00042
  60        4YZ         0.00018   0.00010  -0.01591   0.00004  -0.00025
  61 5   H  1S          0.19232   0.06094  -0.26372  -0.14476   0.02922
  62        2S          0.24311  -0.05581  -0.45260  -0.17647   0.20427
  63        3PX        -0.02063  -0.01860  -0.03017  -0.00318   0.00783
  64        3PY         0.03478   0.01369  -0.02451  -0.03067   0.02053
  65        3PZ         0.00203   0.01490   0.03534  -0.00958   0.00428
  66 6   H  1S         -0.30330  -0.36050   0.00540  -0.02558   0.10814
  67        2S         -0.35227  -0.17722   0.01467   0.23738  -0.37668
  68        3PX        -0.02565  -0.01181   0.00098   0.01737  -0.05284
  69        3PY         0.00295   0.01821   0.00135  -0.00021  -0.01893
  70        3PZ         0.00050   0.00003   0.04480  -0.00126   0.00060
  71 7   H  1S          0.20613   0.07104   0.25032  -0.15855   0.04087
  72        2S          0.26724  -0.04395   0.43087  -0.21504   0.22809
  73        3PX        -0.02015  -0.01866   0.02910  -0.00507   0.00938
  74        3PY         0.03552   0.01308   0.02216  -0.03199   0.02152
  75        3PZ        -0.00251  -0.01477   0.03613   0.00845  -0.00340
  76 8   O  1S          0.00352  -0.00475  -0.00012  -0.00878  -0.01207
  77        2S         -0.03603   0.10587  -0.00294  -0.10611  -0.07673
  78        2PX         0.02518  -0.04479   0.00260   0.26804   0.30073
  79        2PY        -0.09708  -0.02811   0.00156   0.01504   0.05243
  80        2PZ        -0.00065  -0.00057   0.11295  -0.00145   0.00183
  81        3S         -0.01594  -0.17519   0.00877   0.51442   0.55442
  82        3PX         0.03729   0.03749  -0.00455  -0.30014  -0.37417
  83        3PY         0.06273   0.02397  -0.00435  -0.02805  -0.02295
  84        3PZ         0.00101   0.00053  -0.06943   0.00017  -0.00114
  85        4XX        -0.01843   0.01868  -0.00016   0.01381   0.02424
  86        4YY         0.00033   0.00214  -0.00043  -0.01262  -0.01129
  87        4ZZ        -0.01238   0.04146  -0.00136  -0.05880  -0.04868
  88        4XY        -0.05377  -0.00742   0.00121  -0.03790  -0.06743
  89        4XZ        -0.00029  -0.00016   0.01034   0.00007   0.00002
  90        4YZ        -0.00024  -0.00008  -0.01283   0.00034  -0.00033
  91 9   H  1S          0.12323  -0.08236   0.00017   0.15682   0.20434
  92        2S         -0.03963   0.08955  -0.00024  -0.63567  -0.88179
  93        3PX        -0.03252   0.00085  -0.00020  -0.05997  -0.04907
  94        3PY         0.01491  -0.01251  -0.00006   0.02475   0.03250
  95        3PZ        -0.00005   0.00003  -0.01533   0.00024  -0.00025
                          36        37        38        39        40
                           V         V         V         V         V
     Eigenvalues --     0.75151   0.79469   0.80396   0.82870   0.85904
   1 1   C  1S         -0.01712   0.00133  -0.01165  -0.01866  -0.00184
   2        2S          0.44860  -0.03072   0.50976  -0.25147  -0.04961
   3        2PX         0.24416   0.02048  -0.25186   0.40454   0.02097
   4        2PY        -0.13989  -0.00966  -0.02822   0.44342   0.03278
   5        2PZ        -0.00147   0.25384   0.02621   0.00727   0.32901
   6        3S         -0.63591   0.02066  -0.70868   1.31123   0.14400
   7        3PX        -0.53743  -0.09898   1.20688  -0.95489  -0.06061
   8        3PY         0.50647  -0.11027   1.46834  -0.44875  -0.02260
   9        3PZ         0.00366  -0.73898  -0.07924  -0.01972  -0.76201
  10        4XX         0.03394  -0.00956   0.10917   0.05501  -0.00317
  11        4YY         0.03274   0.00940  -0.06002  -0.10982  -0.00740
  12        4ZZ         0.01983  -0.00358   0.03361  -0.01181   0.00174
  13        4XY        -0.05371   0.00162  -0.02071  -0.04521  -0.00237
  14        4XZ         0.00051  -0.01236  -0.00046   0.00090  -0.06446
  15        4YZ        -0.00023  -0.00759  -0.00128  -0.00098  -0.08819
  16 2   C  1S          0.02283  -0.00242   0.03871  -0.04842  -0.00181
  17        2S         -0.16147   0.01526  -0.24289   0.17842  -0.01882
  18        2PX        -0.16897   0.00999  -0.08286  -0.08712   0.04009
  19        2PY         0.16903  -0.05235   0.46935   0.39603   0.01305
  20        2PZ         0.00322  -0.46529  -0.05140  -0.01028   0.51221
  21        3S          0.27278  -0.12169   1.65422  -0.70849   0.01991
  22        3PX         0.63915  -0.09048   1.06549  -0.00572  -0.07333
  23        3PY        -0.36741   0.05392  -0.33159  -1.14537  -0.06040
  24        3PZ        -0.00456   1.04888   0.11782   0.02640  -0.72944
  25        4XX        -0.02885   0.00838  -0.08067  -0.14984   0.00767
  26        4YY         0.03663  -0.01220   0.09960   0.03540   0.00592
  27        4ZZ         0.01429  -0.00196   0.05638   0.07318  -0.01792
  28        4XY        -0.00752   0.00040   0.02329  -0.00360  -0.01861
  29        4XZ        -0.00019  -0.01949  -0.00366  -0.00470  -0.05153
  30        4YZ         0.00161  -0.12025  -0.01056   0.00153   0.18066
  31 3   N  1S          0.00364  -0.00267   0.02473   0.02514   0.00212
  32        2S         -0.09527  -0.01656   0.10049   0.15889   0.00366
  33        2PX        -0.28540   0.00003   0.01843  -0.16864  -0.00486
  34        2PY         0.12529  -0.03175   0.26195   0.42046   0.03608
  35        2PZ         0.00853  -0.75322  -0.07310  -0.01457  -0.48788
  36        3S          0.15542   0.13359  -1.33273  -0.38455  -0.04113
  37        3PX         0.61359   0.00295  -0.05711   0.54847   0.02616
  38        3PY        -0.14107  -0.01288   0.16730  -0.14222  -0.01981
  39        3PZ        -0.00975   1.04292   0.10488   0.02275   0.85854
  40        4XX        -0.00983  -0.00299   0.02073   0.03633   0.00167
  41        4YY         0.00851  -0.01025   0.07438   0.14950   0.00660
  42        4ZZ        -0.04657  -0.00575   0.04001   0.01289   0.00385
  43        4XY        -0.00229  -0.00276   0.01780   0.04493   0.00356
  44        4XZ         0.00021  -0.00592  -0.00034   0.00045   0.01333
  45        4YZ        -0.00002   0.00621   0.00085   0.00019   0.02063
  46 4   O  1S         -0.00996   0.00044  -0.00483  -0.00214  -0.00001
  47        2S          0.50331   0.00634  -0.03531  -0.34201   0.02190
  48        2PX         0.11438   0.02082  -0.16709   0.03569   0.00490
  49        2PY        -0.14914   0.02141  -0.17805   0.14787  -0.03000
  50        2PZ        -0.00425   0.21585   0.01689  -0.00653  -0.02582
  51        3S         -0.59702  -0.02349   0.19605   0.50028  -0.02476
  52        3PX        -0.20973  -0.03285   0.24290  -0.03624   0.00135
  53        3PY         0.26555  -0.02830   0.25996  -0.14081   0.03149
  54        3PZ         0.00336  -0.17155  -0.01327   0.00621   0.04995
  55        4XX         0.20593   0.00302  -0.01916  -0.12212   0.00792
  56        4YY         0.14713  -0.00296   0.03880  -0.11957   0.00838
  57        4ZZ         0.11576   0.00172  -0.01542  -0.10208   0.00629
  58        4XY        -0.00754  -0.00170   0.01578  -0.04073   0.00328
  59        4XZ        -0.00049   0.02343   0.00155  -0.00076   0.00037
  60        4YZ        -0.00017   0.00181  -0.00017  -0.00058  -0.02064
  61 5   H  1S          0.20377   0.34306   0.53451  -0.04971  -0.60463
  62        2S         -0.28110  -0.84782  -0.80563  -0.50891   1.19252
  63        3PX        -0.00130  -0.01964  -0.00535  -0.00641  -0.02665
  64        3PY        -0.02606  -0.04968  -0.05187   0.01022   0.03827
  65        3PZ         0.02078   0.02332   0.05358   0.00250  -0.03728
  66 6   H  1S          0.08626  -0.00260   0.09056  -0.68414   0.05999
  67        2S          0.35059  -0.05597   0.66954   1.00477  -0.12505
  68        3PX         0.01827  -0.00044   0.00630   0.07704  -0.00456
  69        3PY         0.02284  -0.00144   0.01819   0.00475   0.00587
  70        3PZ         0.00006  -0.01568  -0.00189   0.00150   0.05559
  71 7   H  1S          0.21737  -0.42037   0.46877  -0.04601   0.55361
  72        2S         -0.31443   0.96676  -0.64745  -0.51471  -1.17858
  73        3PX        -0.00189   0.01874  -0.00116  -0.00498   0.03674
  74        3PY        -0.02919   0.05717  -0.04445   0.01026  -0.04293
  75        3PZ        -0.02083   0.03028  -0.04738  -0.00302  -0.02778
  76 8   O  1S          0.01319   0.00080  -0.00668  -0.00524  -0.00033
  77        2S          0.40078   0.02949  -0.25330  -0.13495   0.00591
  78        2PX         0.35888   0.03294  -0.26639   0.08972  -0.01203
  79        2PY        -0.23703  -0.00664   0.04999   0.08882  -0.00853
  80        2PZ         0.00176  -0.07104  -0.00699  -0.00338  -0.07431
  81        3S         -0.50186  -0.03119   0.28873   0.32521  -0.01501
  82        3PX        -0.34476  -0.04971   0.41806  -0.14183   0.01767
  83        3PY         0.16040  -0.01093   0.10172  -0.10489   0.01813
  84        3PZ        -0.00210   0.09512   0.00956   0.00236   0.07110
  85        4XX         0.16484   0.01369  -0.11033  -0.04685   0.00065
  86        4YY         0.27494   0.02196  -0.18704  -0.02281  -0.00315
  87        4ZZ         0.07709   0.00521  -0.04664  -0.05603   0.00342
  88        4XY        -0.05463   0.00094  -0.00751  -0.02579   0.00258
  89        4XZ         0.00038  -0.00697  -0.00055   0.00021   0.00435
  90        4YZ         0.00018   0.00251   0.00026   0.00032   0.00617
  91 9   H  1S          0.36542   0.02387  -0.20001   0.13877  -0.02214
  92        2S         -0.51734  -0.01112   0.04750  -0.23555   0.01651
  93        3PX        -0.04881  -0.00099   0.00368   0.00166  -0.00007
  94        3PY         0.11819   0.00890  -0.07417   0.00819  -0.00268
  95        3PZ        -0.00017   0.01789   0.00175   0.00048   0.01591
                          41        42        43        44        45
                           V         V         V         V         V
     Eigenvalues --     0.86737   0.90146   0.91706   0.94860   0.96822
   1 1   C  1S         -0.02848   0.02330   0.00022   0.01376   0.01731
   2        2S         -0.46862  -0.12823  -0.00328   0.47158  -0.00946
   3        2PX         0.30152  -0.28820  -0.00439   0.08942   0.16304
   4        2PY         0.38078   0.03654   0.00124  -0.21671  -0.41754
   5        2PZ        -0.02806  -0.00337   0.14546   0.00065  -0.00032
   6        3S          1.54863   0.00022  -0.00820  -0.25153   0.14453
   7        3PX        -0.73349   0.58539   0.00617   0.43468  -0.67859
   8        3PY        -0.21449   0.26936  -0.01392   1.86251   0.63306
   9        3PZ         0.06318   0.00348  -0.31274  -0.00287   0.00560
  10        4XX        -0.02058  -0.00449  -0.00040   0.02149  -0.05177
  11        4YY        -0.08661   0.00013   0.00045   0.06254   0.11608
  12        4ZZ         0.02078   0.00289  -0.00023   0.00368  -0.02698
  13        4XY        -0.03832   0.00772  -0.00048   0.00844  -0.03355
  14        4XZ         0.00455   0.00014   0.03574   0.00003   0.00042
  15        4YZ         0.00712   0.00108   0.00765  -0.00007  -0.00035
  16 2   C  1S         -0.01861  -0.01377   0.00013  -0.00631   0.01922
  17        2S         -0.28335   0.51690  -0.00872   0.79657  -0.40180
  18        2PX         0.55708  -0.25843   0.00595  -0.05002   0.12339
  19        2PY         0.10540  -0.03467  -0.00461  -0.21588  -0.11852
  20        2PZ        -0.04608  -0.01097  -0.12367  -0.00362   0.00999
  21        3S          0.43722  -0.92920   0.01793  -0.97477   0.77560
  22        3PX        -1.00534   0.61401  -0.01915   0.90831  -0.29040
  23        3PY        -0.58115   0.22844   0.01546   0.63950   0.01667
  24        3PZ         0.07074   0.02264   0.41481   0.00867  -0.02789
  25        4XX         0.03710  -0.00828   0.00107   0.06523   0.00167
  26        4YY         0.00151   0.01962  -0.00143   0.12183  -0.00439
  27        4ZZ        -0.08551   0.02653  -0.00030  -0.09761  -0.00678
  28        4XY        -0.15696   0.06709  -0.00082   0.02242  -0.01566
  29        4XZ         0.01277  -0.00172  -0.02563   0.00568  -0.00050
  30        4YZ        -0.02308  -0.00055  -0.02078  -0.00638   0.00096
  31 3   N  1S          0.02823   0.00601  -0.00008   0.01452  -0.00742
  32        2S          0.01796   0.09132  -0.00077   0.08458   0.10053
  33        2PX        -0.03159  -0.25461  -0.00031  -0.37576  -0.58450
  34        2PY         0.46453   0.05205  -0.00056   0.15560  -0.02946
  35        2PZ         0.03897   0.00029   0.08494   0.00174  -0.00118
  36        3S         -0.46391  -0.52545   0.01046  -1.41107  -0.34239
  37        3PX         0.31381   0.12408  -0.00698   0.89192   0.92294
  38        3PY        -0.24682   0.02367  -0.00369   0.27186  -0.16492
  39        3PZ        -0.06937  -0.00181  -0.03428  -0.00068  -0.00027
  40        4XX         0.02193   0.02711   0.00040  -0.00772   0.03180
  41        4YY         0.08924  -0.01946  -0.00079   0.01632  -0.09207
  42        4ZZ         0.03066   0.05304   0.00005   0.03429   0.05785
  43        4XY         0.04464   0.01077   0.00018   0.00273   0.01102
  44        4XZ        -0.00160  -0.00029   0.01333  -0.00001   0.00004
  45        4YZ        -0.00151   0.00015  -0.01960  -0.00009  -0.00025
  46 4   O  1S         -0.00023   0.01950   0.00039  -0.02082  -0.01560
  47        2S          0.14710   0.19111  -0.00004   0.18310  -0.34382
  48        2PX         0.05252   0.21004   0.00642  -0.16532  -0.05675
  49        2PY        -0.22995  -0.30178  -0.00145  -0.11226   0.29004
  50        2PZ         0.00871   0.00764  -0.42152   0.00337  -0.00312
  51        3S         -0.13858  -0.38108  -0.00393   0.01558   0.65001
  52        3PX        -0.00128  -0.00764  -0.00463   0.00649  -0.24001
  53        3PY         0.25520   0.19654  -0.00318   0.36314  -0.33531
  54        3PZ        -0.00962  -0.00631   0.30591  -0.00493   0.00396
  55        4XX         0.05255   0.07676  -0.00017   0.02623  -0.18529
  56        4YY         0.06677   0.11895   0.00086   0.06616  -0.09682
  57        4ZZ         0.03902   0.08264   0.00049   0.02053  -0.11306
  58        4XY         0.02981   0.07525   0.00102  -0.00062  -0.04633
  59        4XZ         0.00060   0.00027   0.00863   0.00115  -0.00061
  60        4YZ         0.00202   0.00057  -0.01076   0.00052  -0.00021
  61 5   H  1S         -0.12166  -0.15214   0.04530  -0.34765   0.16837
  62        2S         -0.23207   0.34179  -0.26930   0.92257  -0.22188
  63        3PX         0.05273  -0.01283  -0.01091  -0.00805  -0.01450
  64        3PY        -0.02278   0.01768  -0.00914  -0.02997  -0.01296
  65        3PZ        -0.02063  -0.01526   0.00707  -0.06613   0.01080
  66 6   H  1S          0.59370  -0.38348   0.00349   0.03113   0.17969
  67        2S         -1.31760   0.94354  -0.01675   0.49392  -0.60427
  68        3PX        -0.03845   0.03538  -0.00095   0.02727  -0.01455
  69        3PY         0.05435  -0.03828   0.00065   0.01466   0.05002
  70        3PZ        -0.00804   0.00113   0.01420  -0.00115  -0.00121
  71 7   H  1S         -0.24211  -0.16373  -0.04134  -0.36187   0.17665
  72        2S          0.01366   0.37591   0.26593   0.95213  -0.25668
  73        3PX         0.04440  -0.01393   0.01043  -0.01350  -0.01324
  74        3PY        -0.01303   0.01939   0.00957  -0.02695  -0.01507
  75        3PZ         0.02969   0.01477   0.00648   0.06791  -0.01054
  76 8   O  1S         -0.00353  -0.00478  -0.00007  -0.00947  -0.01542
  77        2S          0.04572   0.39116   0.00943  -0.38744   0.25226
  78        2PX        -0.08205   0.00408   0.00484  -0.28210   0.05552
  79        2PY        -0.08494  -0.17155  -0.00287   0.17123   0.33263
  80        2PZ         0.01000   0.00823  -0.85839  -0.01325   0.00651
  81        3S         -0.10666  -0.71203  -0.01645   0.80219  -0.33134
  82        3PX         0.12039  -0.01988  -0.00822   0.45967  -0.23167
  83        3PY         0.18425   0.43588   0.00578  -0.19059  -0.40291
  84        3PZ        -0.00892  -0.00762   0.88607   0.01583  -0.00847
  85        4XX         0.00690   0.13144   0.00323  -0.10915   0.06627
  86        4YY        -0.02835   0.00898   0.00139  -0.16743  -0.04430
  87        4ZZ         0.02685   0.17378   0.00408  -0.14987   0.11438
  88        4XY         0.02348   0.11487   0.00283  -0.07036   0.09204
  89        4XZ        -0.00058  -0.00025   0.02261   0.00028  -0.00022
  90        4YZ        -0.00070  -0.00016   0.01249  -0.00004  -0.00016
  91 9   H  1S         -0.20358  -0.71019  -0.01449   0.29506  -0.40990
  92        2S          0.12965   0.52142   0.01560  -0.67937   0.44572
  93        3PX        -0.00196   0.00256   0.00029  -0.01883   0.05617
  94        3PY        -0.01976  -0.03539  -0.00016  -0.04742  -0.06448
  95        3PZ        -0.00137  -0.00011  -0.00026  -0.00013   0.00002
                          46        47        48        49        50
                           V         V         V         V         V
     Eigenvalues --     0.98021   1.04177   1.11439   1.14470   1.22767
   1 1   C  1S          0.00540   0.00083  -0.02584   0.04727   0.02221
   2        2S         -0.94820   0.01642  -0.36752   0.53092  -0.32504
   3        2PX        -0.12360  -0.00511  -0.07196  -0.04547   0.02995
   4        2PY         0.02430  -0.00127  -0.04095  -0.12939  -0.13595
   5        2PZ        -0.00028   0.17202   0.00172  -0.00557   0.00151
   6        3S          1.54546  -0.05102   1.45457  -1.71719   2.01270
   7        3PX        -0.74945   0.04320   0.49879   1.01933  -0.50259
   8        3PY        -1.08585   0.03248   0.61228   1.67520   0.39157
   9        3PZ        -0.00566  -0.53645  -0.00958   0.02601  -0.00826
  10        4XX        -0.17852   0.00134  -0.17541   0.11724   0.05085
  11        4YY         0.06258   0.00167  -0.03166   0.08547   0.09061
  12        4ZZ        -0.00849  -0.00043   0.12426  -0.09687  -0.14776
  13        4XY        -0.00655  -0.00019   0.08972  -0.06172  -0.00735
  14        4XZ         0.00017   0.06126  -0.00205   0.00211  -0.00021
  15        4YZ         0.00129  -0.03756  -0.00164   0.00376  -0.00339
  16 2   C  1S         -0.00436  -0.00084   0.00334  -0.04704   0.02247
  17        2S         -0.54911  -0.00511   0.02942  -0.85808  -0.01100
  18        2PX        -0.22406   0.00827  -0.01741   0.22706  -0.14663
  19        2PY         0.14165  -0.01363   0.06918  -0.12229  -0.06638
  20        2PZ        -0.01476  -0.12097  -0.00449   0.01492  -0.00620
  21        3S          0.11166   0.05020   0.10383   3.71995  -0.72658
  22        3PX        -0.30207  -0.00384   0.15508   0.07949   0.06948
  23        3PY        -0.86091   0.05774  -0.20284   0.93401  -0.43182
  24        3PZ         0.04205   0.54536   0.01813  -0.05711   0.02264
  25        4XX        -0.03768   0.00181  -0.00642  -0.03227  -0.06750
  26        4YY        -0.13399  -0.00061  -0.05615   0.02452   0.19314
  27        4ZZ         0.06933  -0.00233   0.06451  -0.08386  -0.12618
  28        4XY        -0.01402   0.00083   0.02806   0.03342  -0.06964
  29        4XZ        -0.00383  -0.02773   0.00157  -0.00659   0.01205
  30        4YZ         0.00182  -0.05311   0.00327   0.00016  -0.00807
  31 3   N  1S         -0.03248   0.00012   0.00010  -0.00353   0.00169
  32        2S         -0.07700   0.00101  -0.03791   0.04245   0.62027
  33        2PX        -0.28095  -0.00006  -0.22856  -0.11192  -0.14184
  34        2PY        -0.30388  -0.00035   0.03380  -0.08076  -0.32757
  35        2PZ        -0.00030  -0.14189  -0.00066   0.00195  -0.00014
  36        3S          0.87144  -0.01829  -0.76519  -0.75250  -1.57246
  37        3PX         0.45625  -0.00218   0.56284   0.34988   0.71338
  38        3PY        -0.08752   0.00901   0.24975   0.32422   0.79196
  39        3PZ         0.00115   0.35207   0.00582  -0.01276   0.00506
  40        4XX        -0.02083  -0.00022  -0.09166   0.00657   0.10331
  41        4YY        -0.15594   0.00112  -0.05735   0.02776   0.05641
  42        4ZZ         0.02751  -0.00077   0.11777  -0.05860   0.04415
  43        4XY         0.01073  -0.00066   0.01701  -0.03448  -0.01620
  44        4XZ        -0.00032   0.01337   0.00001  -0.00070   0.00061
  45        4YZ         0.00001   0.01433   0.00131  -0.00277   0.00170
  46 4   O  1S          0.01862  -0.00006  -0.00449  -0.00972  -0.04321
  47        2S          0.31340   0.00322  -0.03216  -0.31086  -0.69294
  48        2PX         0.08598   0.00529  -0.16771   0.58189  -0.29764
  49        2PY        -0.31712  -0.00361   0.45146  -0.05222  -0.31640
  50        2PZ        -0.00279  -0.81917  -0.00121   0.01153  -0.00021
  51        3S         -0.66830  -0.00354   0.52473   0.61782   1.80517
  52        3PX         0.06660  -0.00818   0.65007  -1.04761   0.92040
  53        3PY         0.41212   0.00407  -0.38046   0.01618   0.75215
  54        3PZ         0.00285   1.08523   0.00269  -0.01669   0.00194
  55        4XX         0.19876   0.00016   0.04198  -0.14866  -0.23735
  56        4YY         0.06951   0.00211   0.06923  -0.02711  -0.24258
  57        4ZZ         0.10581   0.00056  -0.08769  -0.11549  -0.13181
  58        4XY        -0.00295   0.00137   0.13153   0.07520  -0.08477
  59        4XZ        -0.00029  -0.00665   0.00044  -0.00103  -0.00015
  60        4YZ        -0.00032  -0.03942  -0.00013   0.00121  -0.00038
  61 5   H  1S          0.10812   0.07784   0.03713  -0.09078   0.03847
  62        2S         -0.65147  -0.41014  -0.13906  -0.22818  -0.04658
  63        3PX         0.01185  -0.01096   0.00098  -0.04568   0.01612
  64        3PY         0.02834  -0.01423   0.01588  -0.01362  -0.07470
  65        3PZ         0.04195  -0.00182   0.01468  -0.00518  -0.04400
  66 6   H  1S         -0.14093   0.00029   0.03494  -0.18829   0.11448
  67        2S          0.06542  -0.02146   0.16597  -0.80461   0.09277
  68        3PX         0.01371  -0.00088  -0.00384  -0.02044   0.04725
  69        3PY        -0.01992   0.00130  -0.01744   0.03609   0.08706
  70        3PZ         0.00165   0.01705   0.00009  -0.00049  -0.00365
  71 7   H  1S          0.09860  -0.09455   0.04056  -0.08419   0.03337
  72        2S         -0.60065   0.45421  -0.12791  -0.28971  -0.01797
  73        3PX         0.01328   0.00768  -0.00180  -0.03796   0.00448
  74        3PY         0.02755   0.01355   0.01436  -0.01373  -0.07444
  75        3PZ        -0.04216  -0.00025  -0.01460   0.00490   0.04753
  76 8   O  1S         -0.00106  -0.00025   0.01452  -0.02754   0.00263
  77        2S         -0.13491  -0.00909   0.02747  -0.63385  -0.14604
  78        2PX        -0.27223  -0.00307  -0.35173  -0.09750   0.17886
  79        2PY         0.20094  -0.00469  -0.53836  -0.23841  -0.34026
  80        2PZ        -0.00046   0.40368  -0.00135  -0.00248  -0.00073
  81        3S          0.27893   0.02180   0.09740   1.77154  -0.02839
  82        3PX         0.43852   0.00487   0.54881  -0.01958   0.11031
  83        3PY        -0.28636   0.00734   1.25570   0.31749   1.18241
  84        3PZ         0.00045  -0.66042   0.00219   0.00525   0.00245
  85        4XX        -0.04380  -0.00094   0.08795  -0.03939  -0.13115
  86        4YY        -0.05309  -0.00348   0.11994  -0.24627  -0.02119
  87        4ZZ        -0.07700  -0.00336  -0.09300  -0.22820   0.03639
  88        4XY        -0.04322  -0.00048   0.02371   0.01288  -0.11490
  89        4XZ         0.00016  -0.03091   0.00052   0.00078  -0.00018
  90        4YZ        -0.00001  -0.04875   0.00023   0.00130  -0.00030
  91 9   H  1S          0.26166   0.00187   0.11627   0.09937   0.01383
  92        2S         -0.36601  -0.01464  -1.12314  -1.00270  -0.94510
  93        3PX        -0.01400  -0.00156  -0.03023  -0.10176  -0.06521
  94        3PY        -0.04591  -0.00002   0.09894   0.00675   0.06466
  95        3PZ        -0.00013  -0.01012   0.00008   0.00018  -0.00007
                          51        52        53        54        55
                           V         V         V         V         V
     Eigenvalues --     1.30344   1.35508   1.39518   1.49669   1.53624
   1 1   C  1S          0.00089  -0.00572   0.02913  -0.01037  -0.00021
   2        2S          0.02162   0.09064   0.02524  -0.56978   0.00104
   3        2PX        -0.00218  -0.05529  -0.29709  -0.00915   0.00020
   4        2PY        -0.00365  -0.04131   0.03795   0.01388   0.00125
   5        2PZ         0.10649  -0.00353  -0.00061   0.00047   0.10629
   6        3S         -0.05865   0.70514  -0.69960   5.05991  -0.00896
   7        3PX         0.07708   1.50031   1.69822  -0.03415  -0.00077
   8        3PY         0.08711   1.81428   0.78073   0.82193  -0.01495
   9        3PZ        -0.42424   0.00759   0.00010   0.00345  -0.15234
  10        4XX        -0.00256  -0.17035   0.24523  -0.12320  -0.00259
  11        4YY        -0.00433  -0.12162  -0.14962   0.07510   0.00228
  12        4ZZ         0.00566   0.19584  -0.07648  -0.00092   0.00003
  13        4XY         0.00562   0.23006   0.03001   0.16526  -0.00120
  14        4XZ        -0.27190   0.01097   0.00334   0.00287   0.42659
  15        4YZ        -0.31697   0.01287  -0.00002  -0.00354  -0.35896
  16 2   C  1S         -0.00344  -0.04857  -0.04545   0.10229  -0.00004
  17        2S         -0.05782  -0.95738  -0.73778   1.18901   0.00165
  18        2PX        -0.00197  -0.16026   0.02025   0.09797   0.00178
  19        2PY        -0.00419  -0.03717  -0.12153  -0.01129  -0.00192
  20        2PZ        -0.15755   0.00079  -0.00059   0.00131  -0.05034
  21        3S          0.21856   3.36248   2.89293  -3.64883  -0.00830
  22        3PX         0.03688   0.82997   0.27923  -0.73501  -0.01240
  23        3PY         0.03731   0.27882   0.84108  -0.53221   0.01135
  24        3PZ         0.42055   0.00599   0.00259  -0.00692   0.25128
  25        4XX        -0.01202  -0.06050  -0.22854  -0.00308   0.00390
  26        4YY        -0.01039   0.00443   0.36670   0.09279  -0.00419
  27        4ZZ         0.01563  -0.05102  -0.22602   0.04090   0.00031
  28        4XY         0.01574   0.06022  -0.03119   0.02944  -0.00095
  29        4XZ         0.56689  -0.01884   0.00779   0.00232   0.01020
  30        4YZ         0.13299  -0.00794  -0.01232  -0.00009  -0.07290
  31 3   N  1S          0.00118   0.03529   0.01755   0.05266  -0.00015
  32        2S          0.02165   0.70960   0.37702   1.15626  -0.00351
  33        2PX        -0.00077  -0.06497  -0.04272   0.07146   0.00207
  34        2PY        -0.00211  -0.06598  -0.07704  -0.09513   0.00067
  35        2PZ         0.09186  -0.00437  -0.00006   0.00059   0.07199
  36        3S         -0.09909  -3.07966  -1.42640  -4.26159   0.01745
  37        3PX        -0.00610   0.12518  -0.46147   0.38495  -0.00540
  38        3PY         0.03204   1.07826   0.48643   1.54562  -0.00495
  39        3PZ         0.22749  -0.00433  -0.00063  -0.00003   0.01937
  40        4XX        -0.00065  -0.09674   0.01134   0.11328   0.00095
  41        4YY         0.00823   0.22027   0.14999   0.14302  -0.00115
  42        4ZZ         0.00289   0.18562   0.01366   0.14999  -0.00116
  43        4XY        -0.00332  -0.06391  -0.17107   0.04289   0.00087
  44        4XZ         0.03442  -0.00175   0.00034   0.00345   0.44932
  45        4YZ         0.23105  -0.00941  -0.00118   0.00005  -0.00516
  46 4   O  1S          0.00183   0.04411   0.01092   0.03471   0.00000
  47        2S          0.02484   0.78259   0.09384   0.25450   0.00202
  48        2PX         0.00500  -0.16295   0.00348   0.38008  -0.00095
  49        2PY         0.00422   0.12202   0.09878   0.09910   0.00053
  50        2PZ        -0.03855   0.00388   0.00195  -0.00092   0.06154
  51        3S         -0.07520  -2.11293  -0.07467  -0.97997  -0.00328
  52        3PX        -0.02970  -0.18419   0.24515  -0.81383   0.00275
  53        3PY        -0.02679  -0.72988  -0.02292  -0.52218  -0.00130
  54        3PZ         0.07277  -0.00732  -0.00210  -0.00015  -0.01438
  55        4XX         0.00531   0.18102   0.20500  -0.00831  -0.00105
  56        4YY         0.00906   0.21264   0.02865   0.19767   0.00348
  57        4ZZ         0.00799   0.24036  -0.08129   0.07425  -0.00128
  58        4XY         0.00336   0.05072  -0.02504   0.06386   0.00034
  59        4XZ         0.02769  -0.00284  -0.00024   0.00430  -0.31456
  60        4YZ        -0.03273   0.00021   0.00029   0.00368  -0.02513
  61 5   H  1S          0.02621  -0.20635  -0.15490   0.39303  -0.02700
  62        2S         -0.23111  -0.42113  -0.14630   0.31004  -0.14310
  63        3PX         0.18632   0.01225  -0.00406  -0.05592  -0.01037
  64        3PY         0.02897  -0.02863  -0.09598  -0.02649   0.01131
  65        3PZ         0.02374  -0.01414  -0.07090  -0.00600   0.00338
  66 6   H  1S         -0.01231  -0.13554  -0.15018   0.34704  -0.00290
  67        2S         -0.01525  -0.10671  -0.39375   0.19883  -0.00550
  68        3PX         0.00112   0.00442   0.03264  -0.00053   0.00015
  69        3PY        -0.00782   0.00128   0.11544   0.04946   0.00046
  70        3PZ        -0.17661   0.00668  -0.00310  -0.00277   0.02857
  71 7   H  1S         -0.04910  -0.20168  -0.15470   0.39510   0.02813
  72        2S          0.18510  -0.41791  -0.13230   0.30141   0.15338
  73        3PX        -0.18868   0.02175  -0.01251  -0.05707   0.00946
  74        3PY        -0.02253  -0.02805  -0.09413  -0.02940  -0.00974
  75        3PZ         0.01283   0.01496   0.07527   0.00818   0.00250
  76 8   O  1S         -0.00157  -0.04404   0.05047   0.00690   0.00010
  77        2S         -0.02391  -0.67018   0.82373   0.04317   0.00211
  78        2PX         0.00877   0.24773  -0.23841  -0.02653  -0.00036
  79        2PY         0.00564   0.01738   0.12164   0.05485   0.00015
  80        2PZ        -0.02373   0.00014  -0.00061   0.00077   0.01201
  81        3S          0.06728   1.82892  -2.11890   0.02756  -0.00532
  82        3PX        -0.03268  -0.90837   0.68194  -0.14233   0.00173
  83        3PY        -0.02606  -0.27900  -0.39374  -0.73493  -0.00073
  84        3PZ         0.02425  -0.00027   0.00161  -0.00322  -0.03122
  85        4XX        -0.00583  -0.26777   0.23905   0.15304   0.00400
  86        4YY        -0.01204  -0.26219   0.40259   0.00363  -0.00259
  87        4ZZ        -0.00258  -0.03179   0.03539  -0.06621   0.00027
  88        4XY         0.00110   0.02565   0.03628  -0.03794  -0.00177
  89        4XZ         0.01310   0.00046   0.00079  -0.00342   0.03300
  90        4YZ        -0.01912   0.00210   0.00144  -0.00419   0.40017
  91 9   H  1S         -0.00838  -0.25287   0.13725   0.13324   0.00023
  92        2S          0.01040  -0.01450   0.90993   0.66716   0.00327
  93        3PX         0.00055   0.05475   0.07577   0.08066  -0.00184
  94        3PY        -0.00134   0.00852  -0.03252  -0.03262  -0.00099
  95        3PZ        -0.00851   0.00088   0.00050  -0.00076   0.20122
                          56        57        58        59        60
                           V         V         V         V         V
     Eigenvalues --     1.57606   1.58599   1.62534   1.69776   1.72371
   1 1   C  1S          0.00047   0.00039   0.00001  -0.01070  -0.00467
   2        2S          0.18903  -0.01218  -0.00062  -0.33221  -0.05176
   3        2PX         0.04940  -0.00322  -0.00017  -0.06552   0.00807
   4        2PY         0.01023  -0.00187   0.00027   0.01053   0.01010
   5        2PZ        -0.00245  -0.02363  -0.02876   0.00151  -0.09896
   6        3S          0.14770   0.04596  -0.00169   1.35403  -0.05571
   7        3PX         0.87411  -0.03447  -0.00789   0.50668  -0.30878
   8        3PY         1.45668  -0.03388  -0.01397  -0.02647  -0.58903
   9        3PZ        -0.00401  -0.02196   0.03989   0.00952  -0.44213
  10        4XX        -0.06179   0.00354  -0.00109   0.18192   0.00857
  11        4YY         0.12336  -0.00539  -0.00070   0.20674  -0.02672
  12        4ZZ        -0.10755   0.00486   0.00201  -0.31088   0.01953
  13        4XY        -0.05354   0.00514   0.00105  -0.28951  -0.00412
  14        4XZ        -0.01902  -0.31863   0.16633  -0.00562   0.24315
  15        4YZ         0.01952   0.23987  -0.06593  -0.00648   0.34167
  16 2   C  1S         -0.04072   0.00321   0.00040   0.00987   0.00666
  17        2S         -0.55389   0.04683   0.00648   0.25476   0.06761
  18        2PX        -0.12584   0.01002   0.00190   0.04073  -0.01040
  19        2PY         0.09075  -0.00619  -0.00128   0.01886  -0.01229
  20        2PZ        -0.00199   0.00355   0.00415   0.00073  -0.02078
  21        3S          2.23893  -0.14775  -0.02354  -0.61831  -0.54959
  22        3PX         0.83703  -0.03927  -0.01059  -0.31362  -0.20572
  23        3PY         0.00578  -0.00032   0.00294   0.05008  -0.08005
  24        3PZ         0.00829  -0.03091   0.04067  -0.01503   0.53690
  25        4XX         0.14888  -0.00979  -0.00092  -0.01598  -0.03908
  26        4YY        -0.21470   0.01089  -0.00043   0.06227   0.03606
  27        4ZZ         0.02132   0.00208   0.00172  -0.05276   0.00805
  28        4XY         0.01393   0.00309   0.00084  -0.10753  -0.01662
  29        4XZ        -0.00432   0.00312   0.01169  -0.00197   0.35379
  30        4YZ         0.00324   0.02768  -0.04988  -0.00119   0.02056
  31 3   N  1S          0.02644  -0.00050  -0.00018   0.00613  -0.00667
  32        2S          0.45342  -0.00785  -0.00296   0.05235  -0.09712
  33        2PX         0.13369  -0.00723  -0.00004   0.01270  -0.00365
  34        2PY         0.01051  -0.00029   0.00016  -0.05348  -0.01894
  35        2PZ        -0.00387  -0.02989  -0.03575   0.00367  -0.19922
  36        3S         -2.16940   0.03640   0.01715  -0.58272   0.67394
  37        3PX        -0.07165   0.01414  -0.00163   0.14884  -0.06606
  38        3PY         0.68020  -0.01130  -0.00544   0.34276  -0.19187
  39        3PZ         0.00226   0.00189   0.04316  -0.00476   0.27523
  40        4XX         0.24970  -0.01261  -0.00208   0.31171   0.00465
  41        4YY         0.09338  -0.00310  -0.00082  -0.07814  -0.01432
  42        4ZZ        -0.18681   0.01291   0.00183  -0.20500  -0.01636
  43        4XY         0.00052   0.00117   0.00041   0.03598  -0.01475
  44        4XZ        -0.02277  -0.34292   0.12412  -0.00240   0.10426
  45        4YZ        -0.00104   0.02103  -0.03381   0.01002  -0.55386
  46 4   O  1S         -0.01069   0.00053  -0.00005   0.05112   0.00266
  47        2S          0.07568  -0.00836  -0.00247   0.62000   0.03171
  48        2PX        -0.20620   0.01570   0.00239  -0.03957   0.00425
  49        2PY         0.03925  -0.00364  -0.00077   0.22017   0.01367
  50        2PZ        -0.00284  -0.06553   0.04508   0.00013  -0.02542
  51        3S          0.17824  -0.00129   0.00390  -1.77197  -0.10389
  52        3PX         0.58114  -0.04064  -0.00456  -0.20551   0.00393
  53        3PY         0.06150  -0.00008   0.00152  -0.83058  -0.04536
  54        3PZ         0.01017   0.19773  -0.03394  -0.00114   0.06616
  55        4XX        -0.22288   0.01364  -0.00037   0.47828  -0.00682
  56        4YY         0.42205  -0.02651  -0.00244   0.40001   0.03260
  57        4ZZ        -0.16759   0.00869   0.00097  -0.31169   0.00183
  58        4XY        -0.06163   0.00524   0.00198  -0.24407   0.00055
  59        4XZ        -0.01961  -0.34103  -0.09307  -0.00161   0.11946
  60        4YZ        -0.02147  -0.35273  -0.33352   0.00022  -0.12945
  61 5   H  1S         -0.16394   0.05496  -0.02547   0.05844  -0.12957
  62        2S         -0.27609  -0.00532  -0.02178   0.11985  -0.09191
  63        3PX         0.05632   0.00219   0.00813  -0.00197   0.25131
  64        3PY         0.02216  -0.01224   0.01184  -0.00680   0.13908
  65        3PZ         0.02243  -0.01437  -0.00469  -0.00769   0.05051
  66 6   H  1S         -0.14406   0.01667   0.00135  -0.05078   0.00940
  67        2S          0.12814  -0.00386  -0.00287   0.00031   0.00397
  68        3PX        -0.01103  -0.00008   0.00002   0.03074   0.00656
  69        3PY        -0.09764   0.00500   0.00059   0.03731   0.01197
  70        3PZ         0.00278  -0.02258  -0.00391   0.00045  -0.07157
  71 7   H  1S         -0.16876  -0.03436   0.02856   0.05038   0.16988
  72        2S         -0.26924   0.05188   0.03060   0.11561   0.14660
  73        3PX         0.05659  -0.01255  -0.00965   0.00319  -0.23778
  74        3PY         0.02364   0.00963  -0.01141  -0.00249  -0.13998
  75        3PZ        -0.02640  -0.01349  -0.00488   0.00696   0.05903
  76 8   O  1S          0.03066  -0.00126   0.00003  -0.04710  -0.00293
  77        2S          0.44678  -0.02014   0.00013  -0.60967  -0.03200
  78        2PX        -0.00957  -0.00061  -0.00037   0.02322   0.00571
  79        2PY         0.01124  -0.00008   0.00029  -0.06262   0.00101
  80        2PZ         0.00031   0.01436   0.01666   0.00027   0.00565
  81        3S         -1.34271   0.06085  -0.00014   1.99549   0.10425
  82        3PX         0.40142  -0.01758   0.00013  -0.67657  -0.04379
  83        3PY        -0.01155  -0.00543  -0.00197   0.09901   0.00234
  84        3PZ         0.00214  -0.01486   0.15462  -0.00052  -0.04347
  85        4XX         0.58271  -0.03395  -0.00334  -0.36972   0.01303
  86        4YY        -0.15351   0.01270   0.00156  -0.06155  -0.04405
  87        4ZZ        -0.08005   0.00615   0.00198  -0.01637   0.00689
  88        4XY        -0.16340   0.00823   0.00027   0.09353  -0.00756
  89        4XZ         0.01894   0.24460   0.66984   0.00360  -0.06555
  90        4YZ         0.02357   0.47078  -0.28944  -0.00018   0.03753
  91 9   H  1S          0.04898  -0.00005   0.00090  -0.21347  -0.00462
  92        2S          0.56630  -0.02460   0.00046  -0.66087  -0.01226
  93        3PX        -0.16303   0.01172   0.00146  -0.01052  -0.02113
  94        3PY        -0.12255   0.00696   0.00072   0.04803  -0.00125
  95        3PZ         0.00538   0.14613  -0.32463  -0.00206   0.08022
                          61        62        63        64        65
                           V         V         V         V         V
     Eigenvalues --     1.73143   1.76052   1.90842   1.93848   1.98473
   1 1   C  1S         -0.04012   0.03678   0.00016   0.00443   0.00031
   2        2S         -0.38099   0.59902   0.00943  -0.27765   0.01016
   3        2PX         0.07049  -0.06643  -0.00335   0.14446  -0.00371
   4        2PY         0.09092  -0.09622  -0.00112   0.08596  -0.00855
   5        2PZ         0.01099  -0.00276   0.07801   0.00141  -0.02284
   6        3S         -0.81240  -1.56860  -0.00135  -0.39043   0.02373
   7        3PX        -2.73110   1.78233   0.05764  -1.81524   0.03330
   8        3PY        -5.33918   1.74653   0.05795  -1.76090   0.05439
   9        3PZ         0.04300  -0.00808  -0.42180  -0.01186  -0.00888
  10        4XX        -0.01797  -0.33090  -0.01123   0.43864  -0.00751
  11        4YY        -0.23968   0.26743   0.00652  -0.15778  -0.00261
  12        4ZZ         0.26210   0.12809   0.00323  -0.21750   0.01114
  13        4XY        -0.00950  -0.19346  -0.00071   0.01215  -0.00181
  14        4XZ        -0.02640   0.00356   0.33841   0.00344  -0.38032
  15        4YZ        -0.03441   0.00649  -0.00529   0.00295   0.16974
  16 2   C  1S          0.05410  -0.05612  -0.00097   0.02903  -0.00051
  17        2S          0.52195  -0.36995  -0.00209   0.15969   0.00020
  18        2PX        -0.10105   0.15443   0.00563  -0.09709  -0.00114
  19        2PY        -0.10573   0.12505   0.00207  -0.12678   0.00603
  20        2PZ         0.00045   0.00046  -0.03012   0.00067   0.03845
  21        3S         -4.67905   3.03042   0.06371  -2.03537   0.03635
  22        3PX        -1.84579   0.48853   0.00875  -0.33713   0.02851
  23        3PY        -0.66611   0.83808   0.02569  -0.42215  -0.02055
  24        3PZ        -0.04290   0.00372   0.43999   0.00387  -0.30856
  25        4XX        -0.28660  -0.03180  -0.00294   0.08049  -0.01924
  26        4YY         0.41545   0.06400  -0.00975  -0.01136   0.01417
  27        4ZZ        -0.08372  -0.06039   0.01134  -0.03625   0.00385
  28        4XY        -0.26462  -0.17223   0.00426   0.18461  -0.01050
  29        4XZ        -0.02292   0.01384   0.15195   0.00078  -0.05731
  30        4YZ        -0.01882  -0.00550  -0.18898   0.01214   0.43401
  31 3   N  1S         -0.06135   0.01114   0.00077  -0.02724   0.00093
  32        2S         -0.85760   0.21088   0.00504  -0.26385   0.01601
  33        2PX         0.00642   0.25420   0.00338  -0.10020   0.00134
  34        2PY        -0.17032   0.01305   0.00268  -0.02025  -0.00548
  35        2PZ         0.02020  -0.00362  -0.08883  -0.00313  -0.02534
  36        3S          6.13189  -1.54962  -0.06576   2.29501  -0.07564
  37        3PX        -0.71974  -0.44031  -0.00132   0.04050   0.00215
  38        3PY        -1.75782   0.46054   0.02131  -0.80006   0.02762
  39        3PZ        -0.02942   0.00561   0.22207   0.00665   0.04519
  40        4XX        -0.08219  -0.25665   0.01787  -0.64242   0.01621
  41        4YY        -0.15103  -0.23927  -0.00195   0.05070  -0.00275
  42        4ZZ        -0.00841   0.50529  -0.01352   0.48452  -0.00796
  43        4XY        -0.07698   0.45932   0.00105   0.01503   0.00081
  44        4XZ        -0.01944  -0.00046  -0.48753  -0.00412   0.41552
  45        4YZ         0.05961  -0.01145   0.09573  -0.00387  -0.25164
  46 4   O  1S          0.01599   0.00198   0.00018  -0.00220   0.00017
  47        2S          0.24400  -0.03799   0.00076  -0.12478   0.00060
  48        2PX         0.02318   0.03281   0.00048   0.05215  -0.00475
  49        2PY         0.09749  -0.03911   0.00088  -0.05169  -0.00168
  50        2PZ         0.00087   0.00034  -0.00621  -0.00217  -0.05611
  51        3S         -0.76230   0.06155  -0.00289   0.22227  -0.00117
  52        3PX         0.11152  -0.10996  -0.00375  -0.05327   0.00956
  53        3PY        -0.31521   0.05240  -0.00382   0.17513   0.00224
  54        3PZ        -0.00317  -0.00009   0.01888   0.00418   0.09681
  55        4XX        -0.15200   0.01797   0.00205   0.03879   0.00233
  56        4YY         0.28186   0.10149  -0.00966   0.28504  -0.00486
  57        4ZZ         0.05427  -0.09902   0.00823  -0.35108   0.00357
  58        4XY         0.01394  -0.11478   0.00758  -0.28872   0.00657
  59        4XZ        -0.01486   0.00386  -0.47551  -0.02148  -0.41835
  60        4YZ         0.01148  -0.00283   0.54721   0.02279   0.39693
  61 5   H  1S          0.19590  -0.15973  -0.18505   0.09817   0.28996
  62        2S          0.24464  -0.05172  -0.07996   0.08366  -0.04242
  63        3PX         0.03147  -0.03972   0.10262   0.07109   0.05029
  64        3PY        -0.07016  -0.03904   0.10069   0.03637  -0.08305
  65        3PZ        -0.07894  -0.03003   0.00012   0.04673   0.07363
  66 6   H  1S         -0.00820  -0.32540  -0.00316   0.19005   0.01203
  67        2S         -0.02181  -0.18033  -0.00296   0.03655   0.00485
  68        3PX         0.10575   0.12467   0.00171  -0.14371  -0.00140
  69        3PY         0.21414   0.17105   0.00097  -0.22501   0.01647
  70        3PZ         0.00375  -0.00401  -0.02178   0.00286   0.15072
  71 7   H  1S          0.17465  -0.15033   0.17965   0.08671  -0.31673
  72        2S          0.23927  -0.04971   0.08115   0.09031   0.04076
  73        3PX         0.06998  -0.05516  -0.10769   0.06990  -0.06132
  74        3PY        -0.03994  -0.04742  -0.09976   0.03619   0.09228
  75        3PZ         0.07124   0.03416  -0.00054  -0.04213   0.07271
  76 8   O  1S         -0.01654   0.01870   0.00013  -0.00527   0.00044
  77        2S         -0.15741   0.17828   0.00067  -0.05183  -0.00022
  78        2PX         0.05550   0.02785  -0.00192   0.06335   0.00185
  79        2PY         0.00804  -0.02188   0.00150  -0.03976   0.00167
  80        2PZ        -0.00012  -0.00016  -0.01324   0.00029   0.01519
  81        3S          0.51038  -0.64479   0.00135   0.03474  -0.00626
  82        3PX        -0.29424   0.08876   0.00301  -0.11010   0.00167
  83        3PY        -0.03377  -0.22918  -0.00148   0.00636   0.00206
  84        3PZ         0.00302  -0.00050   0.06703   0.00113   0.00059
  85        4XX         0.21084   0.06125  -0.00369   0.05630   0.00306
  86        4YY        -0.39625   0.12823   0.00502  -0.10231   0.00072
  87        4ZZ         0.06752  -0.03138  -0.00009  -0.01786  -0.00205
  88        4XY        -0.10618  -0.06289   0.00432  -0.13011   0.00236
  89        4XZ         0.00854  -0.00187   0.07421   0.00448   0.09693
  90        4YZ        -0.00072   0.00058  -0.04755  -0.00268  -0.07391
  91 9   H  1S         -0.01598  -0.03079   0.00167  -0.07263   0.00116
  92        2S          0.11886   0.52289  -0.00630   0.18780  -0.00102
  93        3PX        -0.16606   0.16496  -0.00040   0.05863  -0.00223
  94        3PY        -0.02869  -0.03690   0.00156  -0.04352   0.00010
  95        3PZ        -0.00785   0.00201  -0.14503  -0.00574  -0.09265
                          66        67        68        69        70
                           V         V         V         V         V
     Eigenvalues --     2.02265   2.03513   2.04760   2.08370   2.10472
   1 1   C  1S         -0.00854  -0.00083  -0.02477  -0.00063  -0.00232
   2        2S         -0.06977  -0.00777  -0.22232  -0.01387   0.04787
   3        2PX        -0.09962   0.00242   0.12262   0.01345  -0.23532
   4        2PY         0.07070   0.00845   0.24736   0.02261  -0.27391
   5        2PZ        -0.00375  -0.00541  -0.00513   0.03562   0.00085
   6        3S          0.27824  -0.00291  -0.50638  -0.08490   1.35645
   7        3PX         0.67687   0.01168  -0.66101  -0.00449  -0.36788
   8        3PY         0.28091  -0.01337  -1.61667  -0.06659  -0.27313
   9        3PZ         0.00413   0.04373   0.01124  -0.22837  -0.00840
  10        4XX         0.03728  -0.00164  -0.20349  -0.01521   0.28857
  11        4YY         0.10963   0.00802   0.15984   0.01498  -0.19093
  12        4ZZ        -0.16542  -0.01106  -0.07231  -0.00698   0.00362
  13        4XY        -0.04667   0.00006   0.10331   0.00702  -0.12361
  14        4XZ        -0.00816   0.11666  -0.00293  -0.31809  -0.01048
  15        4YZ         0.00144  -0.05831  -0.00351   0.18352   0.00531
  16 2   C  1S         -0.00329  -0.00011   0.00893  -0.00100   0.03436
  17        2S         -0.10378  -0.00216   0.11392  -0.00608   0.25403
  18        2PX         0.05738   0.00273   0.04246   0.00436   0.03132
  19        2PY        -0.04840  -0.00259  -0.11278  -0.00586  -0.06751
  20        2PZ         0.00395   0.01488   0.00797  -0.12043  -0.00325
  21        3S          0.56516   0.00571  -1.14233   0.00646  -1.27442
  22        3PX        -0.27703  -0.01263  -0.68254  -0.01298  -0.81676
  23        3PY         0.51161   0.02454   0.45145   0.05921  -0.43926
  24        3PZ        -0.02615  -0.06881  -0.04155   0.65489   0.02149
  25        4XX         0.38577   0.01987   0.48924   0.01951  -0.03842
  26        4YY        -0.01669   0.00351   0.09561  -0.00743  -0.12299
  27        4ZZ        -0.35629  -0.02273  -0.57693  -0.01040   0.13716
  28        4XY        -0.18825  -0.00002   0.00694   0.03335  -0.51910
  29        4XZ         0.01774  -0.01473   0.01807   0.14733   0.01413
  30        4YZ         0.00705   0.02449   0.01147  -0.51698  -0.02068
  31 3   N  1S          0.00486  -0.00028  -0.02214  -0.00129   0.00587
  32        2S          0.00590  -0.00920  -0.45475  -0.03643   0.37049
  33        2PX         0.00045   0.00235   0.07368   0.00701  -0.12454
  34        2PY         0.07369   0.00704   0.15570   0.01597  -0.23313
  35        2PZ        -0.00070   0.00683   0.00039  -0.01552  -0.00089
  36        3S         -0.52957   0.01552   1.99641   0.11546  -0.50385
  37        3PX        -0.00085  -0.00537  -0.25555  -0.02224   0.24242
  38        3PY         0.16300  -0.00698  -0.66380  -0.04328   0.30860
  39        3PZ         0.00172  -0.01959  -0.00154   0.06601   0.00347
  40        4XX        -0.03470  -0.00544  -0.14610  -0.00547  -0.02603
  41        4YY         0.02410   0.00041   0.04888   0.00061  -0.00134
  42        4ZZ         0.00370   0.00152  -0.03241  -0.00408   0.10379
  43        4XY        -0.05207   0.00204  -0.00513   0.00433  -0.09128
  44        4XZ         0.00339  -0.11873  -0.00438   0.31964   0.00886
  45        4YZ        -0.01076   0.05291  -0.00831  -0.10442  -0.00528
  46 4   O  1S         -0.01353   0.00045   0.01543  -0.00016   0.01812
  47        2S          0.37602   0.00607  -0.15652   0.00204  -0.07978
  48        2PX         0.21382   0.00535  -0.14149   0.00326  -0.05828
  49        2PY         0.24379   0.00594  -0.09857   0.00431  -0.10670
  50        2PZ        -0.00199   0.02586  -0.00258  -0.01227  -0.00176
  51        3S         -0.42913  -0.01578  -0.03956  -0.00191  -0.20446
  52        3PX        -0.19939  -0.00802   0.07756  -0.00032  -0.18870
  53        3PY        -0.32521  -0.01210  -0.03466  -0.00670  -0.02262
  54        3PZ         0.00407  -0.03988   0.00442   0.01320   0.00228
  55        4XX        -0.28509  -0.00305   0.18221   0.01016  -0.24224
  56        4YY        -0.03817  -0.00094  -0.04536  -0.00724   0.24928
  57        4ZZ         0.43859   0.01006  -0.18823  -0.00307   0.01091
  58        4XY        -0.16380   0.00545   0.25981  -0.00684   0.32657
  59        4XZ        -0.01089   0.08965  -0.00307  -0.12842  -0.00612
  60        4YZ         0.00602  -0.06234   0.00260   0.11295   0.00498
  61 5   H  1S          0.20539   0.03319   0.37536  -0.38918   0.01703
  62        2S         -0.03575   0.01914   0.06950  -0.01700   0.06638
  63        3PX         0.12815   0.37272  -0.00958  -0.08134   0.28776
  64        3PY        -0.08409  -0.33244  -0.18015  -0.18566   0.09625
  65        3PZ         0.03503  -0.24134   0.04898  -0.37067  -0.00730
  66 6   H  1S         -0.41846  -0.01472  -0.35610  -0.01123  -0.16552
  67        2S         -0.06680  -0.00449  -0.05340  -0.00403  -0.02564
  68        3PX         0.09480  -0.00689   0.13926   0.00804   0.05668
  69        3PY        -0.18563   0.00585  -0.09088  -0.00178  -0.18937
  70        3PZ        -0.00452   0.60170   0.00149  -0.19887  -0.00339
  71 7   H  1S          0.18075  -0.00879   0.33934   0.42126   0.04771
  72        2S         -0.03103  -0.02046   0.07201   0.01877   0.06841
  73        3PX         0.14223  -0.36310  -0.00503   0.07181   0.29967
  74        3PY        -0.09999   0.31007  -0.20376   0.14134   0.12030
  75        3PZ        -0.00079  -0.26985  -0.00041  -0.37557  -0.02297
  76 8   O  1S         -0.01560  -0.00009   0.00765  -0.00021   0.00305
  77        2S          0.30760   0.00252  -0.23645   0.00468  -0.26706
  78        2PX        -0.26179  -0.00311   0.16331  -0.00289   0.10718
  79        2PY        -0.15566  -0.00040   0.14337  -0.00112   0.10955
  80        2PZ         0.00027  -0.00335   0.00148  -0.00759   0.00032
  81        3S         -0.18655   0.00240   0.29949  -0.00304   0.46345
  82        3PX         0.21921   0.00097  -0.22011   0.00205  -0.21459
  83        3PY        -0.04687  -0.00552  -0.06254   0.00520  -0.29855
  84        3PZ        -0.00087   0.00268  -0.00231   0.01934  -0.00059
  85        4XX        -0.23138  -0.00382   0.15805   0.00040  -0.04165
  86        4YY        -0.08189  -0.00165   0.04719  -0.00525   0.20109
  87        4ZZ         0.39924   0.00652  -0.27387   0.00675  -0.26000
  88        4XY        -0.21069  -0.00188   0.23199  -0.00047   0.15818
  89        4XZ         0.00139  -0.00410   0.00409  -0.01515   0.00052
  90        4YZ        -0.00183   0.02005   0.00167  -0.04986  -0.00051
  91 9   H  1S          0.09979   0.00238  -0.05508  -0.00125   0.02360
  92        2S         -0.01330   0.00082   0.00966   0.00069  -0.05678
  93        3PX         0.09757   0.00169  -0.10272  -0.00777   0.20349
  94        3PY         0.04396   0.00089  -0.01940  -0.00225   0.09776
  95        3PZ        -0.00172   0.01386  -0.00129  -0.01022  -0.00016
                          71        72        73        74        75
                           V         V         V         V         V
     Eigenvalues --     2.24038   2.34373   2.34837   2.36132   2.43049
   1 1   C  1S         -0.01455  -0.00305  -0.00798  -0.07799  -0.00010
   2        2S          0.28136  -0.04881  -0.03410  -0.41195  -0.00157
   3        2PX        -0.30822  -0.11225  -0.02836  -0.11458  -0.00026
   4        2PY        -0.24742   0.15537   0.02026   0.10882   0.00073
   5        2PZ        -0.00470  -0.02551   0.25272  -0.02252  -0.00756
   6        3S          1.20367  -0.30267   0.16551   1.88669   0.00182
   7        3PX        -0.51267  -0.90190  -0.10796  -0.07415   0.00271
   8        3PY         0.70614  -0.47653  -0.10461  -0.74279  -0.00006
   9        3PZ        -0.00438  -0.03110   0.31858  -0.03510  -0.08726
  10        4XX        -0.12562  -0.10266   0.00950   0.22499   0.00047
  11        4YY         0.07720   0.16938   0.05067   0.32729   0.00114
  12        4ZZ         0.06108   0.01599  -0.07310  -0.76912  -0.00164
  13        4XY         0.03547   0.11561  -0.01061  -0.23199  -0.00099
  14        4XZ         0.00130   0.01136  -0.14420   0.01355  -0.01980
  15        4YZ        -0.00595  -0.04249   0.43835  -0.03982   0.01611
  16 2   C  1S          0.03411   0.01308   0.00451   0.02484   0.00003
  17        2S          0.38190  -0.03486   0.00762   0.00770  -0.00262
  18        2PX         0.07964  -0.10717  -0.02361  -0.20186  -0.00101
  19        2PY        -0.06162  -0.02641  -0.00409   0.02333   0.00111
  20        2PZ         0.00243  -0.00048  -0.00928  -0.00493  -0.00615
  21        3S         -1.07964  -0.61964  -0.18796  -1.06410   0.00411
  22        3PX        -0.36187   0.17995  -0.01618  -0.18200   0.00225
  23        3PY        -0.62837  -0.61612  -0.12968  -0.66121   0.00026
  24        3PZ         0.00506   0.05417  -0.51928   0.06816   0.10033
  25        4XX         0.08956   0.25670   0.02576  -0.02079   0.00027
  26        4YY        -0.35784  -0.26163  -0.03780  -0.00448  -0.00019
  27        4ZZ         0.17457   0.04407   0.01603   0.05864   0.00099
  28        4XY        -0.47779  -0.01242  -0.01501  -0.03086   0.00030
  29        4XZ         0.01023   0.02605  -0.27495   0.02103   0.02551
  30        4YZ         0.00409   0.03456  -0.33822   0.03230   0.02340
  31 3   N  1S          0.00390  -0.00896  -0.00116  -0.00363  -0.00001
  32        2S          0.30044  -0.40380  -0.03732  -0.00749   0.00014
  33        2PX        -0.03506  -0.01010   0.00975   0.11278   0.00034
  34        2PY        -0.02819   0.15393   0.02537   0.10104   0.00024
  35        2PZ        -0.00009   0.00253  -0.02707   0.00224  -0.01587
  36        3S         -1.08116   1.15595   0.08417  -0.15591  -0.00166
  37        3PX         0.45256   0.25956   0.02477  -0.09806  -0.00053
  38        3PY         0.26035  -0.52493  -0.04266   0.07272   0.00064
  39        3PZ         0.00535   0.02850  -0.28576   0.02847   0.05726
  40        4XX        -0.35064  -0.13424  -0.05878  -0.38948  -0.00094
  41        4YY         0.35639   0.18892   0.03687   0.12667   0.00029
  42        4ZZ        -0.02132  -0.09162   0.01164   0.19769   0.00043
  43        4XY        -0.32892  -0.36152  -0.04083   0.01722  -0.00007
  44        4XZ        -0.00680  -0.03571   0.36829  -0.03398   0.00866
  45        4YZ        -0.01062  -0.05777   0.57089  -0.05301  -0.03848
  46 4   O  1S         -0.01666   0.00049   0.00114   0.00773  -0.00002
  47        2S         -0.22003  -0.21853   0.01476   0.49118   0.00196
  48        2PX         0.08971   0.01022  -0.01200  -0.20021  -0.00087
  49        2PY         0.02895  -0.16245  -0.00103   0.14380   0.00030
  50        2PZ         0.00025   0.00038   0.00855  -0.00016  -0.09854
  51        3S          0.63431   0.38777  -0.03745  -0.96548  -0.00329
  52        3PX        -0.17322  -0.08982   0.02501   0.50468   0.00169
  53        3PY         0.07641   0.43299  -0.00213  -0.47532  -0.00143
  54        3PZ         0.00006  -0.00015  -0.02305   0.00036   0.34393
  55        4XX         0.44380  -0.43262  -0.03680  -0.05301  -0.00303
  56        4YY        -0.39699   0.53736   0.03096  -0.17109  -0.00104
  57        4ZZ        -0.19298  -0.14953   0.01608   0.35468   0.00402
  58        4XY        -0.26262  -0.11882   0.02341   0.39647  -0.00069
  59        4XZ         0.00028  -0.00424   0.04753  -0.00565   0.63801
  60        4YZ         0.00003  -0.00113   0.01918  -0.00348   0.55212
  61 5   H  1S          0.02175  -0.00715  -0.05226  -0.00781  -0.01264
  62        2S          0.03892  -0.16596   0.28797  -0.11551  -0.03648
  63        3PX        -0.01568  -0.26635   0.26460  -0.12382  -0.02699
  64        3PY         0.08583   0.01034   0.38149   0.10699  -0.02931
  65        3PZ         0.03196   0.04402   0.13232   0.00131  -0.01994
  66 6   H  1S         -0.06406   0.02531   0.00947   0.10579   0.00008
  67        2S          0.14847   0.29346   0.03634   0.15928   0.00171
  68        3PX         0.23827   0.21346   0.02116   0.03240   0.00032
  69        3PY         0.12965   0.44458   0.06510   0.31215  -0.00013
  70        3PZ         0.00067  -0.02153   0.22700  -0.03441  -0.04573
  71 7   H  1S          0.02600  -0.01937   0.05384  -0.01704   0.01270
  72        2S          0.03347  -0.11605  -0.32027  -0.05014   0.03318
  73        3PX        -0.00936  -0.21827  -0.31594  -0.07323   0.02479
  74        3PY         0.09877   0.06396  -0.34526   0.16483   0.02807
  75        3PZ        -0.04730  -0.07190   0.12523  -0.03533  -0.01871
  76 8   O  1S         -0.00324  -0.00340   0.00046   0.00754   0.00000
  77        2S          0.08048   0.00216   0.00600   0.05569   0.00040
  78        2PX        -0.00442  -0.05698  -0.00377   0.01909  -0.00026
  79        2PY        -0.05013   0.07270   0.01102   0.04011   0.00011
  80        2PZ        -0.00011  -0.00054   0.00193  -0.00050   0.08544
  81        3S         -0.13229   0.02166  -0.01212  -0.15281  -0.00078
  82        3PX         0.05221   0.10067   0.00642  -0.04415   0.00065
  83        3PY         0.22461  -0.15664  -0.02455  -0.10573  -0.00025
  84        3PZ         0.00038   0.00110  -0.00386   0.00129  -0.31169
  85        4XX         0.10329  -0.19631  -0.00199   0.18070  -0.00139
  86        4YY        -0.12614   0.15589  -0.00682  -0.22098  -0.00157
  87        4ZZ         0.02861   0.04228   0.01345   0.08256   0.00310
  88        4XY        -0.03958   0.06966   0.01597   0.11311  -0.00079
  89        4XZ         0.00011  -0.00287   0.02219  -0.00353   0.59483
  90        4YZ        -0.00065  -0.00475   0.04279  -0.00623   0.58081
  91 9   H  1S         -0.07189   0.09325   0.02365   0.16584   0.00084
  92        2S          0.04723  -0.23234  -0.00732   0.14630   0.00010
  93        3PX        -0.25219   0.24040   0.01373  -0.06358   0.00014
  94        3PY        -0.15592   0.24843   0.02075  -0.01279   0.00043
  95        3PZ        -0.00046   0.00313  -0.01903   0.00237  -0.06803
                          76        77        78        79        80
                           V         V         V         V         V
     Eigenvalues --     2.49254   2.63493   2.67415   2.72628   2.74886
   1 1   C  1S         -0.03409  -0.09497  -0.00086  -0.05720   0.00092
   2        2S         -0.20254  -0.18855   0.00304  -0.30594   0.00476
   3        2PX         0.06133  -0.11291   0.00160  -0.20311   0.00320
   4        2PY         0.02113  -0.42999  -0.00877  -0.26813   0.00482
   5        2PZ         0.00006   0.00341  -0.14279  -0.00438   0.04566
   6        3S          0.22006  -0.10771   0.03050  -1.13140   0.01459
   7        3PX        -1.23586  -0.60609   0.01127  -0.90023   0.01233
   8        3PY        -1.65550  -1.06088   0.02275  -1.50575   0.01941
   9        3PZ         0.00004   0.00014   0.04932   0.00067  -0.01004
  10        4XX         0.10684  -0.19296   0.01812  -0.46878   0.00431
  11        4YY        -0.05813  -0.13482  -0.02187   0.43649  -0.00516
  12        4ZZ        -0.12422  -0.24521  -0.00587  -0.16326   0.00420
  13        4XY         0.08073   0.40364   0.01224  -0.16481   0.00278
  14        4XZ        -0.00235   0.00925  -0.43099  -0.01038   0.07935
  15        4YZ         0.00035   0.01190  -0.57584  -0.02150   0.11611
  16 2   C  1S          0.02532   0.02403   0.00030   0.01925  -0.00034
  17        2S          0.09042  -0.01632  -0.00283   0.07121  -0.00007
  18        2PX        -0.10754  -0.10628   0.00055  -0.09828   0.00192
  19        2PY        -0.07867  -0.12076  -0.00664   0.10082  -0.00169
  20        2PZ        -0.00071   0.00500  -0.13531  -0.00512   0.02359
  21        3S         -1.67004  -0.81963   0.01330  -1.21860   0.01609
  22        3PX        -0.52153  -0.94096   0.00102  -0.59051   0.00569
  23        3PY        -0.58858  -0.35963  -0.02316   0.33704  -0.00213
  24        3PZ         0.00254   0.00750  -0.57839  -0.01960   0.13939
  25        4XX         0.09177  -0.10523  -0.00384  -0.31149   0.00708
  26        4YY        -0.01155   0.18560  -0.01041   0.03402   0.00397
  27        4ZZ        -0.05831  -0.09857   0.01258   0.32741  -0.01213
  28        4XY         0.00380   0.18047   0.01513  -0.09561  -0.00207
  29        4XZ         0.00287  -0.00270   0.18449  -0.00384  -0.09904
  30        4YZ        -0.00367   0.00583  -0.37084   0.00157   0.07424
  31 3   N  1S         -0.00279  -0.04379  -0.00020  -0.02935   0.00042
  32        2S         -0.46752  -0.44923   0.01373  -0.69857   0.00909
  33        2PX        -0.09654  -0.00750  -0.00365   0.06686  -0.00075
  34        2PY         0.02803   0.06399  -0.00369   0.04565  -0.00013
  35        2PZ        -0.00004  -0.00231   0.11625   0.00475   0.01124
  36        3S          1.95481   1.93047  -0.03674   2.72835  -0.03662
  37        3PX         0.08529  -0.41940  -0.00663  -0.19279   0.00309
  38        3PY        -0.64032  -0.91822   0.01391  -1.23622   0.01719
  39        3PZ        -0.00015  -0.00406   0.13980   0.00298  -0.09326
  40        4XX         0.11779  -0.07862   0.00870  -0.40198   0.00609
  41        4YY         0.01790   0.32112  -0.01009   0.68653  -0.01003
  42        4ZZ        -0.03884  -0.37131  -0.00160  -0.23519   0.00310
  43        4XY        -0.01433   0.52100   0.02074  -0.07050  -0.00035
  44        4XZ         0.00092   0.00400  -0.17138  -0.00777  -0.00689
  45        4YZ        -0.00062   0.01299  -0.56653  -0.01748   0.13698
  46 4   O  1S         -0.01019   0.00881   0.00001   0.01256  -0.00016
  47        2S          0.26888  -0.13500  -0.00420   0.02413  -0.00096
  48        2PX         0.01605   0.08662   0.00126   0.03391  -0.00024
  49        2PY         0.08507  -0.02386   0.00039  -0.00431  -0.00012
  50        2PZ         0.00012  -0.00136  -0.00183  -0.00121  -0.01926
  51        3S         -0.51058   0.13939   0.00896  -0.21778   0.00403
  52        3PX        -0.05383  -0.17514   0.00068  -0.20721   0.00287
  53        3PY        -0.29083   0.07043   0.00066  -0.03506   0.00127
  54        3PZ        -0.00045   0.00234   0.02030   0.00356   0.09351
  55        4XX        -0.11806   0.03627   0.00855  -0.18760   0.00271
  56        4YY        -0.07588   0.06944  -0.00552   0.18556  -0.00238
  57        4ZZ         0.15289  -0.06370  -0.00301   0.09063  -0.00131
  58        4XY         0.02068  -0.07096   0.00127  -0.06604   0.00058
  59        4XZ         0.00022  -0.00042   0.02144  -0.00126   0.02888
  60        4YZ         0.00024  -0.00015   0.05074   0.00272   0.14638
  61 5   H  1S          0.07004   0.05253  -0.02138   0.04198   0.00769
  62        2S         -0.04309  -0.01999   0.33723   0.30785  -0.09234
  63        3PX        -0.00359   0.47527  -0.14253   0.06911   0.06423
  64        3PY         0.08688   0.24039   0.28817  -0.25724  -0.04559
  65        3PZ         0.05440   0.07431   0.09224  -0.31103  -0.01373
  66 6   H  1S          0.03203   0.02447   0.00053   0.01859  -0.00016
  67        2S          0.08351  -0.32325  -0.00435  -0.30735   0.00480
  68        3PX         0.09841   0.16199  -0.00380  -0.26429   0.00710
  69        3PY         0.21454   0.30990   0.02368  -0.25819  -0.00068
  70        3PZ        -0.00014  -0.01633   0.62323   0.00945  -0.16871
  71 7   H  1S          0.07159   0.05401   0.02192   0.04408  -0.00897
  72        2S         -0.04633  -0.00490  -0.34691   0.30012   0.08370
  73        3PX        -0.00431   0.47382   0.16101   0.06346  -0.06578
  74        3PY         0.07947   0.25395  -0.26421  -0.25018   0.05409
  75        3PZ        -0.05592  -0.07150   0.09752   0.32606  -0.03038
  76 8   O  1S         -0.04062  -0.00324   0.00074  -0.02550   0.00040
  77        2S         -0.53678   0.10868   0.00607  -0.08970   0.00120
  78        2PX         0.15030  -0.05432  -0.00038  -0.02542   0.00037
  79        2PY        -0.24769   0.04816   0.00088   0.02183  -0.00036
  80        2PZ         0.00009   0.00016   0.01082   0.00070   0.01760
  81        3S          1.35978  -0.12959  -0.01950   0.48789  -0.00725
  82        3PX        -0.56016   0.10006   0.00628  -0.12552   0.00258
  83        3PY         0.49392  -0.11675  -0.00330  -0.03638   0.00139
  84        3PZ        -0.00078   0.00070  -0.08923  -0.00787  -0.33154
  85        4XX        -0.18393  -0.06398   0.00581  -0.21864   0.00145
  86        4YY         0.42380  -0.00108  -0.00942   0.25805  -0.00230
  87        4ZZ        -0.65114   0.06934   0.00846  -0.19307   0.00325
  88        4XY        -0.46668   0.07436   0.00170   0.03811  -0.00068
  89        4XZ         0.00108  -0.00184   0.12885   0.01017   0.47491
  90        4YZ         0.00067   0.00394  -0.12842  -0.01153  -0.57815
  91 9   H  1S         -0.82958   0.08269   0.01042  -0.22606   0.00264
  92        2S         -0.14311   0.05757   0.00483  -0.02608   0.00012
  93        3PX         0.03912  -0.02469   0.00171  -0.12759   0.00037
  94        3PY        -0.43806   0.06920   0.00264  -0.05250  -0.00013
  95        3PZ        -0.00016  -0.00500   0.22101   0.02033   1.00624
                          81        82        83        84        85
                           V         V         V         V         V
     Eigenvalues --     2.85174   2.95987   3.01978   3.02977   3.12235
   1 1   C  1S         -0.05849  -0.04316  -0.00208   0.02095  -0.07729
   2        2S         -0.59294  -0.12533  -0.00983  -0.00919   0.99214
   3        2PX        -0.21412  -0.13479  -0.00062  -0.00206   0.25615
   4        2PY        -0.67673  -0.13990  -0.00951   0.07939   0.62300
   5        2PZ         0.00130  -0.00074   0.03928   0.00412   0.00066
   6        3S         -1.44810  -0.32259   0.00319   0.06315   2.02345
   7        3PX        -0.56690  -0.15331  -0.04386   0.41039   0.01679
   8        3PY        -1.26055  -0.82185  -0.11203   0.97811   0.17072
   9        3PZ        -0.00056  -0.00112   0.24643   0.02518   0.00104
  10        4XX         0.21434   0.21154   0.05405  -0.46840  -0.28478
  11        4YY        -0.45415  -0.10730  -0.04825   0.47949   0.36427
  12        4ZZ         0.03437  -0.23280  -0.01401   0.11351  -0.69207
  13        4XY         0.16347   0.30915   0.03071  -0.37564   0.72958
  14        4XZ         0.00074   0.00232   0.30678   0.02793  -0.00082
  15        4YZ         0.00904  -0.00278   0.61940   0.06236   0.00024
  16 2   C  1S          0.02516   0.02968   0.00442  -0.04556   0.10233
  17        2S         -0.29951  -0.22107  -0.02145   0.26741  -0.46405
  18        2PX        -0.05479  -0.04954  -0.00043   0.01684  -0.07194
  19        2PY        -0.05389  -0.11082  -0.01496   0.13497   0.04321
  20        2PZ         0.00089   0.00016   0.09278   0.00833  -0.00151
  21        3S         -0.57517  -0.53271  -0.10142   0.89328  -1.24777
  22        3PX         0.30881  -0.29441  -0.02607   0.20595  -0.28387
  23        3PY        -0.15933   0.18770  -0.01317   0.08704  -0.07871
  24        3PZ         0.01091   0.00264  -0.23190  -0.02841  -0.00257
  25        4XX        -0.02738   0.04600   0.00336  -0.18663  -0.06285
  26        4YY         0.33154  -0.38503  -0.06295   0.43699   0.20080
  27        4ZZ        -0.14952   0.41103   0.07505  -0.40522   0.02107
  28        4XY        -0.48717  -0.06986   0.01825   0.04435  -0.19306
  29        4XZ         0.01958  -0.01339   0.80841   0.09512   0.00761
  30        4YZ        -0.01924   0.01875   0.07403  -0.01124  -0.00587
  31 3   N  1S         -0.04471  -0.00021  -0.00115   0.01139   0.01031
  32        2S         -0.37223  -0.45828   0.01135  -0.11045  -0.04675
  33        2PX        -0.15647  -0.07801  -0.00566   0.05528   0.16723
  34        2PY        -0.22427   0.08326  -0.01042   0.07713   0.55787
  35        2PZ        -0.00160   0.00042  -0.09261  -0.00924   0.00044
  36        3S          2.66464   1.28089   0.08316  -0.73492  -1.45382
  37        3PX        -0.53762  -0.15983  -0.04584   0.43008   0.29330
  38        3PY        -1.21101  -0.52365  -0.01479   0.11956   0.81880
  39        3PZ        -0.00269   0.00042  -0.25262  -0.02476   0.00015
  40        4XX        -0.06599   0.19634   0.00795  -0.10554   0.23631
  41        4YY         0.50414   0.03664  -0.01963   0.22820  -0.82601
  42        4ZZ        -0.40340  -0.07841   0.00895  -0.07860   0.29608
  43        4XY         0.66910   0.20751   0.04603  -0.43564  -0.32777
  44        4XZ         0.00385  -0.00111   0.16728   0.01719  -0.00008
  45        4YZ         0.00687  -0.00131   0.49254   0.04853  -0.00088
  46 4   O  1S         -0.01175  -0.01475  -0.00417   0.04456   0.04543
  47        2S          0.09408  -0.14743   0.01037   0.04684   0.29513
  48        2PX        -0.05328  -0.01714   0.00108  -0.03537   0.00566
  49        2PY        -0.01943   0.00329   0.00172  -0.01241  -0.01762
  50        2PZ         0.00091  -0.00039   0.00229   0.00005  -0.00049
  51        3S         -0.08656   0.45503   0.02212  -0.62327  -1.25482
  52        3PX         0.16368   0.44279   0.00918  -0.23528  -0.57376
  53        3PY         0.03503   0.11571   0.01168  -0.32685  -0.56119
  54        3PZ        -0.00190   0.00173  -0.01394  -0.00192  -0.00048
  55        4XX        -0.10609   0.35753  -0.03287   0.26531  -0.06305
  56        4YY         0.00937  -0.22254   0.00931  -0.15441  -0.02256
  57        4ZZ        -0.01477  -0.19886  -0.01361   0.22247   0.29022
  58        4XY        -0.02734   0.23709   0.00983  -0.21316  -0.42348
  59        4XZ         0.00019   0.00071   0.00684   0.00088  -0.00191
  60        4YZ        -0.00024   0.00006  -0.00838  -0.00131  -0.00123
  61 5   H  1S         -0.01054   0.01793   0.00093  -0.03194   0.20218
  62        2S         -0.02325   0.12990   0.08085  -0.05421   0.23375
  63        3PX        -0.45176   0.02700  -0.44593   0.01085  -0.05551
  64        3PY         0.19657  -0.27486  -0.11070   0.21988   0.26797
  65        3PZ         0.10194  -0.26407   0.02797   0.23351  -0.32616
  66 6   H  1S         -0.02348  -0.00203   0.00528  -0.05092   0.11188
  67        2S          0.36623  -0.05779   0.01065  -0.11662   0.10300
  68        3PX        -0.06970   0.16035   0.02568  -0.26764   0.18970
  69        3PY        -0.37000   0.05030   0.03083  -0.08802  -0.27348
  70        3PZ         0.01117  -0.00653   0.51203   0.05560   0.01044
  71 7   H  1S         -0.01188   0.01899   0.00622  -0.03087   0.20251
  72        2S         -0.01901   0.14021  -0.07051  -0.07654   0.23381
  73        3PX        -0.44027   0.00967   0.43478   0.11839  -0.06379
  74        3PY         0.19208  -0.26349   0.04162   0.22787   0.28401
  75        3PZ        -0.12232   0.27376   0.09564  -0.22767   0.31200
  76 8   O  1S         -0.01157   0.04829  -0.00222   0.00437  -0.03032
  77        2S          0.01578  -0.04503   0.02818  -0.38336  -0.34778
  78        2PX        -0.00012   0.07910  -0.00326   0.02459  -0.03567
  79        2PY         0.00099  -0.07113   0.00488  -0.05157  -0.00615
  80        2PZ        -0.00032   0.00017   0.00084   0.00011   0.00007
  81        3S          0.02920  -0.48784  -0.04684   0.91194   1.26483
  82        3PX        -0.04707   0.02415   0.03751  -0.60546  -0.65203
  83        3PY        -0.00216   0.33332  -0.01301  -0.00226  -0.38858
  84        3PZ         0.00091   0.00018  -0.01754  -0.00288  -0.00196
  85        4XX         0.03593   0.47308  -0.04823   0.54977   0.20065
  86        4YY        -0.07166  -0.41275   0.02066  -0.22846   0.05942
  87        4ZZ        -0.05338   0.22492   0.00367  -0.16893  -0.29781
  88        4XY        -0.01312  -0.45872   0.02653  -0.15093   0.32453
  89        4XZ        -0.00055   0.00001   0.02236   0.00363   0.00155
  90        4YZ        -0.00020  -0.00161  -0.03562  -0.00347   0.00083
  91 9   H  1S         -0.03357  -0.04208   0.02403  -0.26972  -0.07442
  92        2S          0.04424  -0.18316   0.03815  -0.40020  -0.13625
  93        3PX         0.08838   0.63579  -0.05515   0.56434  -0.00017
  94        3PY         0.05256   0.20358  -0.02696   0.30073   0.09856
  95        3PZ        -0.00010   0.00129   0.06429   0.00727   0.00034
                          86        87        88        89        90
                           V         V         V         V         V
     Eigenvalues --     3.15353   3.34902   3.48614   3.51041   3.56871
   1 1   C  1S          0.01446  -0.07625  -0.00103   0.02296  -0.01138
   2        2S         -0.58877   0.60041   0.00358  -0.04435   0.27514
   3        2PX        -0.07439   0.00519  -0.00006  -0.00177   0.05259
   4        2PY        -0.29147   0.18934  -0.00037  -0.08831   0.06101
   5        2PZ        -0.00049   0.00027   0.00537   0.00117   0.00024
   6        3S         -0.18859   1.29341   0.00506  -0.47913   0.57422
   7        3PX        -0.09967  -0.16909   0.00172   0.09133  -0.27777
   8        3PY        -0.85879  -0.25716   0.00158  -0.01574   0.23852
   9        3PZ        -0.00174   0.00126   0.10238   0.00578   0.00250
  10        4XX         0.40701  -0.04316  -0.00454   0.11253  -0.13017
  11        4YY        -0.36691   0.18743  -0.00016  -0.17983   0.00583
  12        4ZZ         0.22870  -0.54488  -0.00300   0.18935  -0.08538
  13        4XY        -0.24482   0.70527   0.00259  -0.02633   0.08607
  14        4XZ        -0.00421  -0.00073   0.08539   0.00142  -0.00029
  15        4YZ        -0.01028  -0.00031   0.02658   0.00625  -0.00024
  16 2   C  1S         -0.01034  -0.06365  -0.00026  -0.00920  -0.00479
  17        2S          0.25209   0.60577   0.00140   0.03169   0.17903
  18        2PX         0.08200  -0.48862   0.02395  -0.55271  -0.03109
  19        2PY        -0.07565  -0.40849  -0.02943   0.64256  -0.00621
  20        2PZ         0.00187   0.00291  -0.88512  -0.03594  -0.00659
  21        3S         -0.46239   0.14985   0.00440   0.18524  -0.22075
  22        3PX        -0.45547  -0.55785   0.01809  -0.47228  -0.16093
  23        3PY         0.08202  -0.37911  -0.02097   0.60316  -0.14516
  24        3PZ        -0.00245   0.00185  -0.65418  -0.03229  -0.01095
  25        4XX         0.10125  -0.25414  -0.01208   1.01656  -0.02744
  26        4YY        -0.28123  -0.17951   0.04420  -0.30086  -0.04899
  27        4ZZ         0.12745   0.28549  -0.03184  -0.80837  -0.03938
  28        4XY         0.13423  -0.77278  -0.01829  -0.38895  -0.06630
  29        4XZ        -0.02232   0.00576  -0.13754   0.04132   0.00033
  30        4YZ         0.00691  -0.00540   1.14733  -0.00124   0.00679
  31 3   N  1S         -0.00747  -0.02042   0.00022  -0.02176   0.02785
  32        2S          0.08376  -0.07484  -0.00266   0.14325  -0.06671
  33        2PX        -0.10286   0.08134   0.00113  -0.05445  -0.00161
  34        2PY        -0.29449   0.37389   0.00158  -0.09048   0.01086
  35        2PZ         0.00154   0.00052  -0.01240  -0.00102   0.00006
  36        3S          0.95340  -0.34821  -0.00282   0.24635  -0.38709
  37        3PX        -0.30497   0.04272  -0.00324  -0.06883   0.38815
  38        3PY        -0.32802   0.29971  -0.00057  -0.06543   0.23949
  39        3PZ         0.00244  -0.00051  -0.03146  -0.00335  -0.00035
  40        4XX        -0.02044   0.10259   0.00145  -0.04121   0.12870
  41        4YY         0.24070  -0.53995   0.00071  -0.03656  -0.03803
  42        4ZZ        -0.10278   0.07051  -0.00007  -0.10129   0.15415
  43        4XY         0.32301  -0.04741   0.00071   0.08722  -0.09884
  44        4XZ        -0.00243   0.00015  -0.01005   0.00189  -0.00003
  45        4YZ        -0.00643  -0.00060   0.04538   0.00456   0.00004
  46 4   O  1S          0.07684   0.03556   0.00373   0.00429  -0.23601
  47        2S          0.74254   0.03401  -0.00066  -0.08085   0.09000
  48        2PX        -0.03864   0.02318   0.00017   0.02691   0.04490
  49        2PY         0.02923   0.00977   0.00163   0.00035  -0.05771
  50        2PZ        -0.00004   0.00042   0.01520  -0.00065   0.00017
  51        3S         -2.70922  -0.45292  -0.03194   0.11465   1.73140
  52        3PX        -1.17825  -0.14886  -0.00464  -0.10366   0.10003
  53        3PY        -1.29643  -0.17396  -0.00830   0.02434   0.22674
  54        3PZ        -0.00336  -0.00141  -0.03614   0.00159   0.00004
  55        4XX        -0.18362   0.04563   0.00819   0.07908  -0.51675
  56        4YY        -0.17718   0.08918   0.01155  -0.00947  -0.76922
  57        4ZZ         0.66407   0.14113   0.01489  -0.01712  -0.91529
  58        4XY        -0.81421  -0.08794  -0.00296  -0.01630   0.18490
  59        4XZ        -0.00268   0.00022   0.00753  -0.00116   0.00105
  60        4YZ        -0.00262  -0.00017  -0.00542  -0.00014   0.00048
  61 5   H  1S          0.03184  -0.26581   0.64348   0.40639   0.03163
  62        2S         -0.01175  -0.31337   0.51876   0.33734  -0.02010
  63        3PX         0.06632   0.01897  -0.09714  -0.01248   0.02597
  64        3PY        -0.21674  -0.35256   0.57917   0.30633   0.01395
  65        3PZ        -0.01025   0.49103  -0.81100  -0.53859   0.01659
  66 6   H  1S         -0.02635  -0.34910   0.01030  -0.74256  -0.02034
  67        2S         -0.14042  -0.41241   0.00859  -0.65576  -0.08825
  68        3PX         0.07558  -0.67968   0.01364  -0.99754  -0.08222
  69        3PY         0.18693   0.23418  -0.00658   0.50852   0.01800
  70        3PZ        -0.01372  -0.01687   0.03364  -0.02649  -0.00060
  71 7   H  1S          0.03654  -0.26117  -0.65788   0.38736   0.02290
  72        2S         -0.01567  -0.30930  -0.53159   0.31720  -0.03648
  73        3PX         0.03866   0.03518   0.12622  -0.02894   0.02727
  74        3PY        -0.21915  -0.36724  -0.62497   0.30876   0.00389
  75        3PZ         0.01987  -0.47075  -0.80151   0.50003  -0.02828
  76 8   O  1S         -0.10982   0.01027   0.00183   0.00594  -0.28274
  77        2S         -0.68098  -0.07480  -0.00402   0.01103   0.11725
  78        2PX        -0.06218  -0.00810  -0.00050  -0.00052  -0.09401
  79        2PY         0.01739  -0.00948   0.00062   0.00091   0.21659
  80        2PZ        -0.00005  -0.00007  -0.00085   0.00019   0.00005
  81        3S          2.95074   0.13458  -0.00398  -0.07197   2.58446
  82        3PX        -1.52155  -0.10361  -0.00443   0.02742  -0.42583
  83        3PY        -0.86034  -0.14010  -0.00576  -0.02209   0.97330
  84        3PZ        -0.00343  -0.00014   0.00723  -0.00060   0.00025
  85        4XX         0.40444   0.05607   0.00658   0.01210  -0.76604
  86        4YY        -0.06639   0.05776   0.00754   0.00023  -0.42715
  87        4ZZ        -0.82805   0.01910   0.00520   0.03186  -1.16607
  88        4XY         0.61436   0.10525   0.00144   0.00107  -0.62665
  89        4XZ         0.00288   0.00015  -0.00496   0.00025   0.00017
  90        4YZ         0.00220   0.00023  -0.00424  -0.00028  -0.00031
  91 9   H  1S         -0.30228   0.04434  -0.00209   0.01793  -0.79224
  92        2S         -0.10589   0.03401   0.00598   0.03120  -1.17789
  93        3PX         0.07380  -0.02145  -0.00131   0.00411  -0.32573
  94        3PY         0.27217  -0.03163  -0.00047  -0.01033   0.84319
  95        3PZ        -0.00024  -0.00015  -0.00256   0.00042   0.00021
                          91        92        93        94        95
                           V         V         V         V         V
     Eigenvalues --     3.65468   3.94172   4.16977   4.32930   4.73061
   1 1   C  1S          0.01488  -0.01067   0.08602  -0.37671   0.26049
   2        2S          0.09512  -0.19928  -0.67190   2.17093  -1.55088
   3        2PX        -0.01390   0.01245   0.14338  -0.05551  -0.04425
   4        2PY        -0.03700  -0.02431   0.33788  -0.14580   0.09577
   5        2PZ         0.00024  -0.00012   0.00026  -0.00047   0.00025
   6        3S         -0.23101   1.34672  -3.05642  -0.60978  -1.16000
   7        3PX        -0.40824   0.48991  -1.73488  -0.68930   0.77840
   8        3PY         0.03662   0.44735  -3.26249  -1.66749   0.94694
   9        3PZ         0.00303  -0.00191  -0.00082  -0.00162  -0.00081
  10        4XX        -0.11570   0.11058   0.38487  -1.35499   1.18222
  11        4YY         0.04937   0.02913   0.63874  -1.74790   1.45555
  12        4ZZ         0.08292  -0.05974   0.34261  -1.32468   0.87397
  13        4XY         0.03995  -0.05779   0.14042  -0.28606   0.49977
  14        4XZ        -0.00092   0.00057   0.00003   0.00050  -0.00021
  15        4YZ        -0.00115   0.00075  -0.00067   0.00003  -0.00044
  16 2   C  1S         -0.00572   0.01128   0.06686  -0.27339  -0.41089
  17        2S          0.17697  -0.06514  -0.29028   1.58590   2.18819
  18        2PX         0.01285  -0.03723  -0.07651   0.19607  -0.09221
  19        2PY         0.00257  -0.00021  -0.12802   0.18273  -0.06885
  20        2PZ        -0.00482   0.00086   0.00062   0.00006  -0.00007
  21        3S         -0.17197  -0.02274  -1.93055   0.21086   3.04391
  22        3PX        -0.23729   0.16268  -0.68476  -0.21925   0.46353
  23        3PY        -0.01216  -0.06877  -0.08878  -0.12061   0.32798
  24        3PZ        -0.01446   0.00933   0.00083   0.00988   0.00042
  25        4XX        -0.04235   0.03985   0.06099  -0.96699  -1.85423
  26        4YY        -0.03297   0.02602   0.25972  -0.99364  -1.76580
  27        4ZZ        -0.05422   0.02841   0.28182  -1.19386  -1.69066
  28        4XY        -0.01967  -0.01931  -0.04188   0.31459  -0.11449
  29        4XZ        -0.00081   0.00110  -0.00134  -0.00183  -0.00009
  30        4YZ         0.00501  -0.00175   0.00193  -0.00053   0.00042
  31 3   N  1S          0.04296   0.12669  -0.52475  -0.13482   0.01014
  32        2S         -0.21019  -0.17228   0.37458   0.22080  -0.20284
  33        2PX        -0.02660  -0.02334   0.06640  -0.15108   0.11773
  34        2PY         0.00686  -0.05882   0.38449  -0.31480   0.37219
  35        2PZ         0.00023  -0.00022   0.00033  -0.00018   0.00035
  36        3S          0.01268  -1.65658   7.30690   2.87150  -0.83312
  37        3PX         0.13605   0.18644  -0.38510  -0.26784  -0.02726
  38        3PY        -0.11353   0.58309  -2.06233  -1.01271   0.38021
  39        3PZ        -0.00082   0.00100  -0.00102  -0.00041   0.00054
  40        4XX         0.13647   0.43923  -1.57430  -0.43640   0.12181
  41        4YY         0.17573   0.30393  -1.55893  -0.09524  -0.27597
  42        4ZZ         0.11870   0.40301  -1.64437  -0.49559   0.12332
  43        4XY        -0.08405  -0.00088  -0.06286   0.12365  -0.03581
  44        4XZ        -0.00009   0.00007  -0.00007   0.00017  -0.00006
  45        4YZ        -0.00027   0.00008  -0.00024   0.00035  -0.00065
  46 4   O  1S         -0.24209   0.33493   0.02169   0.03707   0.00294
  47        2S          0.17126   0.00563  -0.03559   0.04759  -0.01566
  48        2PX         0.01412   0.00877  -0.01718  -0.02867  -0.02910
  49        2PY        -0.11383   0.13190   0.00344   0.00023   0.00401
  50        2PZ        -0.00007   0.00015  -0.00039   0.00010   0.00044
  51        3S          1.59179  -3.31293  -0.25926  -0.44974   0.07167
  52        3PX        -0.32653  -0.28789   0.01983   0.20695   0.06930
  53        3PY         0.22373  -0.66175   0.02160  -0.03006   0.06388
  54        3PZ        -0.00040  -0.00118   0.00085  -0.00032  -0.00104
  55        4XX        -0.84085   1.12392   0.07659   0.06404   0.00639
  56        4YY        -0.73868   1.05192   0.12187   0.16910   0.03162
  57        4ZZ        -0.89190   1.19566   0.06470   0.12544   0.03054
  58        4XY        -0.10285   0.02527   0.02363   0.03889   0.00725
  59        4XZ        -0.00008  -0.00007  -0.00020   0.00027   0.00047
  60        4YZ         0.00001  -0.00018  -0.00003   0.00011   0.00015
  61 5   H  1S          0.04818  -0.01835  -0.00040   0.17859   0.13267
  62        2S          0.01499   0.00249   0.17107  -0.23082  -0.32580
  63        3PX         0.04452  -0.02863   0.00912  -0.06676  -0.02932
  64        3PY         0.01380   0.00843  -0.06410   0.04358   0.15577
  65        3PZ        -0.00331   0.00296  -0.00393  -0.16167  -0.21325
  66 6   H  1S         -0.02130   0.01470   0.00605   0.19390   0.17041
  67        2S         -0.16022   0.13985  -0.01139  -0.15347  -0.28492
  68        3PX        -0.06105   0.01518   0.04474   0.20164   0.24305
  69        3PY         0.00497  -0.00148  -0.00743  -0.08225  -0.14907
  70        3PZ        -0.00034  -0.00018  -0.00021   0.00371   0.00749
  71 7   H  1S          0.04200  -0.01715   0.00097   0.18013   0.13216
  72        2S         -0.00387   0.01379   0.17442  -0.21804  -0.32592
  73        3PX         0.04190  -0.02585   0.00744  -0.07350  -0.03543
  74        3PY         0.00579   0.01201  -0.06570   0.05140   0.16446
  75        3PZ        -0.00611  -0.00084   0.00534   0.15982   0.20539
  76 8   O  1S         -0.12833  -0.35448  -0.14258  -0.02993   0.01074
  77        2S          0.13334  -0.02819  -0.15255  -0.02739   0.03683
  78        2PX         0.25171   0.19228   0.09588   0.02731  -0.00672
  79        2PY        -0.39625  -0.10883  -0.09723  -0.03835   0.01483
  80        2PZ         0.00007   0.00024   0.00013  -0.00003  -0.00014
  81        3S          0.17163   3.48731   1.59822   0.31724  -0.19019
  82        3PX         0.26902  -0.62573  -0.26967  -0.03790   0.06323
  83        3PY        -0.79558  -0.27779   0.19048   0.06230   0.03935
  84        3PZ        -0.00033  -0.00140  -0.00047   0.00016   0.00058
  85        4XX        -0.44805  -1.14479  -0.43626  -0.10503   0.01256
  86        4YY        -1.06435  -1.36306  -0.54149  -0.15190   0.05318
  87        4ZZ        -0.26390  -1.20614  -0.50499  -0.08746   0.03883
  88        4XY         0.88961   0.13066  -0.01822  -0.01313  -0.02839
  89        4XZ         0.00051   0.00025   0.00017  -0.00011  -0.00025
  90        4YZ         0.00064   0.00006  -0.00002  -0.00009  -0.00007
  91 9   H  1S          1.19429   0.24429  -0.03117   0.00069  -0.01066
  92        2S          0.30120  -0.44052  -0.62784  -0.15431   0.03841
  93        3PX         0.65864   0.18465   0.21428   0.10880  -0.05169
  94        3PY        -0.95231  -0.24100  -0.12306  -0.05623   0.02182
  95        3PZ         0.00024   0.00007   0.00029   0.00008  -0.00014
     Density Matrix:
                           1         2         3         4         5
   1 1   C  1S          2.06302
   2        2S         -0.09444   0.35694
   3        2PX        -0.00031  -0.00495   0.34931
   4        2PY        -0.00944   0.00325   0.05068   0.39874
   5        2PZ         0.00001  -0.00002  -0.00002   0.00002   0.32905
   6        3S         -0.13343   0.23220  -0.02032  -0.07585  -0.00031
   7        3PX         0.02249  -0.02815   0.11123  -0.07131  -0.00009
   8        3PY         0.05485  -0.08182  -0.08900   0.03102  -0.00038
   9        3PZ         0.00000   0.00003   0.00010  -0.00009   0.18145
  10        4XX        -0.00898  -0.00356   0.00123  -0.01414   0.00000
  11        4YY        -0.00798  -0.00177  -0.01047   0.00324  -0.00002
  12        4ZZ        -0.00621  -0.01043   0.00020  -0.00415   0.00002
  13        4XY        -0.00399   0.01347   0.00705  -0.01355  -0.00002
  14        4XZ         0.00000  -0.00001   0.00003   0.00000   0.00467
  15        4YZ         0.00001  -0.00002   0.00000   0.00003   0.01918
  16 2   C  1S          0.01498  -0.03140   0.03953   0.04312  -0.00003
  17        2S         -0.03123   0.06140  -0.07816  -0.08717   0.00007
  18        2PX        -0.06531   0.14105  -0.10659  -0.17428   0.00013
  19        2PY        -0.06053   0.12868  -0.15337  -0.13093   0.00020
  20        2PZ         0.00015  -0.00039   0.00030   0.00038   0.05376
  21        3S          0.02339  -0.01317  -0.08399  -0.12531  -0.00025
  22        3PX        -0.00234   0.02132  -0.06214  -0.09080  -0.00029
  23        3PY        -0.01241   0.03955  -0.06514  -0.06722   0.00028
  24        3PZ         0.00007  -0.00041  -0.00018   0.00077   0.01914
  25        4XX        -0.00427   0.00574   0.00451  -0.00832   0.00003
  26        4YY        -0.00421   0.00555  -0.00972   0.00638   0.00002
  27        4ZZ         0.00135  -0.00401   0.00349   0.00407  -0.00003
  28        4XY        -0.00698   0.01252  -0.00814  -0.00631   0.00002
  29        4XZ         0.00001  -0.00002   0.00003   0.00001   0.00811
  30        4YZ         0.00001  -0.00001   0.00000   0.00000   0.00847
  31 3   N  1S          0.01817  -0.02755  -0.02356  -0.06264  -0.00004
  32        2S         -0.03352   0.04485   0.04046   0.12253   0.00006
  33        2PX         0.02838  -0.04492   0.20708  -0.26170  -0.00013
  34        2PY         0.11760  -0.23529  -0.21671  -0.21932  -0.00025
  35        2PZ         0.00010  -0.00021  -0.00003  -0.00014   0.35158
  36        3S         -0.01961  -0.00879   0.05551   0.07123   0.00042
  37        3PX         0.01004  -0.01154   0.13140  -0.16006  -0.00016
  38        3PY         0.07325  -0.14139  -0.14638  -0.12382  -0.00027
  39        3PZ         0.00009  -0.00018  -0.00006  -0.00002   0.23234
  40        4XX         0.00231  -0.00367  -0.01422   0.00131   0.00000
  41        4YY        -0.00894   0.01714   0.02057   0.01110   0.00002
  42        4ZZ         0.00335  -0.00539  -0.00433  -0.00728  -0.00003
  43        4XY        -0.00387   0.00738  -0.01271   0.01762   0.00002
  44        4XZ         0.00000   0.00001   0.00000   0.00001  -0.00873
  45        4YZ        -0.00001   0.00002   0.00001   0.00002  -0.02526
  46 4   O  1S         -0.00339   0.00692   0.00072  -0.00477  -0.00001
  47        2S          0.00678  -0.01616  -0.00040   0.00896   0.00003
  48        2PX         0.00558  -0.00065  -0.08542   0.05514  -0.00012
  49        2PY        -0.00611  -0.00059   0.08057  -0.06426  -0.00001
  50        2PZ         0.00002   0.00012   0.00028  -0.00014   0.01606
  51        3S          0.02145  -0.03718  -0.02490   0.04000  -0.00003
  52        3PX        -0.00314   0.01170  -0.05298   0.03798  -0.00006
  53        3PY        -0.00136  -0.00613   0.05889  -0.04175  -0.00001
  54        3PZ         0.00003   0.00008   0.00026  -0.00005   0.01193
  55        4XX        -0.00097   0.00187   0.00029  -0.00472   0.00001
  56        4YY        -0.00144   0.00131   0.00445  -0.00216   0.00001
  57        4ZZ        -0.00055   0.00020   0.00139  -0.00146   0.00001
  58        4XY         0.00095  -0.00248  -0.00406   0.00336   0.00001
  59        4XZ         0.00000   0.00000  -0.00001   0.00001  -0.00203
  60        4YZ         0.00000   0.00000   0.00000   0.00000   0.00153
  61 5   H  1S          0.00841  -0.02095   0.01746   0.02267   0.00449
  62        2S          0.01111  -0.02292   0.01491   0.03993  -0.02102
  63        3PX        -0.00139   0.00332  -0.00219  -0.00486   0.00110
  64        3PY        -0.00073   0.00216  -0.00271  -0.00411   0.00210
  65        3PZ        -0.00043   0.00075  -0.00083  -0.00041  -0.00029
  66 6   H  1S          0.01111  -0.02783   0.01596   0.02157  -0.00015
  67        2S          0.01669  -0.03783   0.03599   0.01456   0.00031
  68        3PX        -0.00076   0.00173  -0.00484  -0.00146  -0.00009
  69        3PY        -0.00164   0.00337  -0.00449  -0.00302  -0.00002
  70        3PZ         0.00003  -0.00005  -0.00001   0.00004   0.00106
  71 7   H  1S          0.00837  -0.02074   0.01751   0.02277  -0.00435
  72        2S          0.01103  -0.02293   0.01358   0.04180   0.02070
  73        3PX        -0.00139   0.00331  -0.00219  -0.00491  -0.00100
  74        3PY        -0.00072   0.00214  -0.00261  -0.00415  -0.00206
  75        3PZ         0.00041  -0.00072   0.00086   0.00041  -0.00020
  76 8   O  1S          0.00056  -0.00045   0.00094  -0.00159   0.00000
  77        2S          0.00116  -0.00314  -0.01145   0.00310  -0.00001
  78        2PX        -0.00682   0.01593   0.06951  -0.03185   0.00012
  79        2PY         0.00660  -0.01557  -0.05008   0.03940  -0.00001
  80        2PZ        -0.00001  -0.00009  -0.00009   0.00008  -0.03127
  81        3S         -0.01121   0.01863   0.01835   0.01366   0.00002
  82        3PX        -0.00288   0.00761   0.04923  -0.02761   0.00008
  83        3PY         0.00194  -0.00671  -0.03653   0.04003  -0.00001
  84        3PZ        -0.00001  -0.00007  -0.00010   0.00006  -0.02218
  85        4XX         0.00092  -0.00221  -0.00132  -0.00196   0.00000
  86        4YY         0.00140  -0.00210  -0.00655   0.00165  -0.00001
  87        4ZZ         0.00081  -0.00146  -0.00250  -0.00114   0.00000
  88        4XY         0.00034  -0.00049  -0.00043  -0.00024   0.00000
  89        4XZ         0.00000   0.00000   0.00000   0.00000  -0.00055
  90        4YZ         0.00000  -0.00001  -0.00001   0.00001   0.00007
  91 9   H  1S          0.00447  -0.00913  -0.01681   0.00328  -0.00001
  92        2S          0.01136  -0.01837  -0.00812  -0.03054   0.00002
  93        3PX         0.00034  -0.00115  -0.00588   0.00239  -0.00001
  94        3PY         0.00003   0.00008   0.00253  -0.00269   0.00000
  95        3PZ         0.00000   0.00000  -0.00001   0.00001   0.00125
                           6         7         8         9        10
   6        3S          0.20784
   7        3PX         0.00081   0.06441
   8        3PY        -0.05188  -0.02853   0.05320
   9        3PZ        -0.00008  -0.00001   0.00005   0.10947
  10        4XX        -0.00166   0.00378  -0.00229   0.00001   0.00143
  11        4YY        -0.00248  -0.00405   0.00473  -0.00001  -0.00084
  12        4ZZ        -0.00536   0.00136   0.00151   0.00000   0.00030
  13        4XY         0.00407   0.00273  -0.00847   0.00001   0.00102
  14        4XZ        -0.00001   0.00000   0.00000   0.00381   0.00000
  15        4YZ        -0.00006  -0.00003  -0.00007   0.01076   0.00000
  16 2   C  1S          0.01099  -0.00508  -0.00499  -0.00002  -0.00445
  17        2S          0.00377  -0.00408  -0.00086   0.00002   0.00637
  18        2PX         0.13063  -0.03244  -0.02015   0.00016  -0.00608
  19        2PY         0.12335  -0.02627  -0.01862   0.00002   0.01216
  20        2PZ        -0.00011   0.00035   0.00014  -0.00086  -0.00008
  21        3S         -0.04660   0.00817   0.01385   0.00028   0.00925
  22        3PX         0.03563  -0.01225   0.00570   0.00024  -0.00304
  23        3PY         0.04054  -0.00772  -0.00742  -0.00032   0.00692
  24        3PZ        -0.00023  -0.00001   0.00002  -0.01195  -0.00008
  25        4XX         0.00696   0.00416  -0.00362   0.00004   0.00061
  26        4YY         0.00271  -0.00551   0.00208   0.00004  -0.00041
  27        4ZZ        -0.00470  -0.00010   0.00071  -0.00010  -0.00037
  28        4XY         0.01041  -0.00301  -0.00144  -0.00003  -0.00021
  29        4XZ         0.00000   0.00005  -0.00002   0.00451   0.00002
  30        4YZ        -0.00004  -0.00005   0.00001   0.00584  -0.00002
  31 3   N  1S          0.02741   0.01144   0.01293   0.00001   0.00213
  32        2S         -0.05234  -0.01698  -0.00907  -0.00001  -0.00515
  33        2PX        -0.04774   0.11504  -0.09810   0.00012   0.01982
  34        2PY        -0.11186   0.00012   0.09893  -0.00024   0.00473
  35        2PZ        -0.00059  -0.00015  -0.00083   0.19387   0.00002
  36        3S         -0.11133  -0.00200  -0.01266  -0.00010  -0.00137
  37        3PX        -0.02901   0.06684  -0.06848   0.00012   0.01328
  38        3PY        -0.06298  -0.00265   0.06879  -0.00016   0.00111
  39        3PZ        -0.00047  -0.00014  -0.00072   0.12496   0.00001
  40        4XX        -0.00103  -0.00482   0.00546   0.00000  -0.00023
  41        4YY         0.01058   0.00310  -0.00898   0.00003  -0.00017
  42        4ZZ        -0.00160   0.00049   0.00150  -0.00001   0.00021
  43        4XY         0.00447  -0.00828   0.00427  -0.00001  -0.00110
  44        4XZ         0.00001   0.00000   0.00002  -0.00466   0.00000
  45        4YZ         0.00004   0.00001   0.00004  -0.01389   0.00000
  46 4   O  1S          0.01133   0.00649  -0.00499   0.00009   0.00026
  47        2S         -0.02237  -0.01358   0.01110  -0.00018  -0.00060
  48        2PX        -0.07998  -0.07527   0.00036   0.00016   0.00479
  49        2PY         0.10144   0.08878   0.00793  -0.00005  -0.00202
  50        2PZ         0.00099   0.00029   0.00340   0.08621   0.00001
  51        3S         -0.05034  -0.03260   0.02476  -0.00031  -0.00225
  52        3PX        -0.05523  -0.05444  -0.00633   0.00007   0.00367
  53        3PY         0.07568   0.06789   0.01031  -0.00007  -0.00247
  54        3PZ         0.00079   0.00024   0.00286   0.07059   0.00001
  55        4XX         0.00221   0.00111  -0.00150   0.00002   0.00013
  56        4YY         0.00404   0.00318  -0.00020   0.00001   0.00013
  57        4ZZ         0.00130   0.00152  -0.00024   0.00000   0.00003
  58        4XY        -0.00207  -0.00216   0.00204   0.00001  -0.00005
  59        4XZ         0.00000  -0.00001   0.00002  -0.00053   0.00000
  60        4YZ         0.00001   0.00000   0.00003   0.00171   0.00000
  61 5   H  1S         -0.04204   0.00134   0.00959  -0.01422  -0.00316
  62        2S         -0.02982  -0.00492   0.01098  -0.01763  -0.00400
  63        3PX         0.00348  -0.00048  -0.00060   0.00096  -0.00014
  64        3PY         0.00151   0.00004  -0.00034   0.00068   0.00027
  65        3PZ         0.00200  -0.00030  -0.00042  -0.00016   0.00013
  66 6   H  1S         -0.03761   0.02428  -0.00025   0.00039   0.00996
  67        2S         -0.02047   0.03123  -0.00021   0.00076   0.00604
  68        3PX         0.00019  -0.00090   0.00055  -0.00002   0.00037
  69        3PY         0.00379  -0.00152  -0.00015  -0.00002   0.00000
  70        3PZ        -0.00007   0.00003   0.00002  -0.00013   0.00001
  71 7   H  1S         -0.04238   0.00035   0.00977   0.01368  -0.00351
  72        2S         -0.03083  -0.00667   0.01099   0.01645  -0.00433
  73        3PX         0.00356  -0.00045  -0.00064  -0.00094  -0.00013
  74        3PY         0.00144   0.00005  -0.00035  -0.00066   0.00026
  75        3PZ        -0.00194   0.00027   0.00041  -0.00016  -0.00014
  76 8   O  1S         -0.00506   0.00468   0.00805   0.00001   0.00030
  77        2S          0.00877  -0.01260  -0.01175  -0.00002  -0.00058
  78        2PX         0.01990   0.03744  -0.04573  -0.00018  -0.00355
  79        2PY        -0.02074  -0.03762   0.03381  -0.00020   0.00037
  80        2PZ        -0.00011  -0.00015  -0.00130  -0.03130  -0.00001
  81        3S          0.04116   0.00441  -0.02645  -0.00007  -0.00428
  82        3PX         0.01186   0.02693  -0.03189  -0.00013  -0.00206
  83        3PY        -0.00978  -0.02762   0.02539  -0.00013  -0.00087
  84        3PZ        -0.00013  -0.00014  -0.00116  -0.02621  -0.00001
  85        4XX         0.00077   0.00086   0.00270   0.00002   0.00024
  86        4YY        -0.00550  -0.00474   0.00171   0.00001   0.00034
  87        4ZZ        -0.00106  -0.00045   0.00112  -0.00001   0.00004
  88        4XY         0.00007   0.00025  -0.00038   0.00001  -0.00012
  89        4XZ        -0.00001   0.00000  -0.00003  -0.00153   0.00000
  90        4YZ        -0.00003  -0.00001  -0.00008  -0.00154   0.00000
  91 9   H  1S         -0.02371  -0.02121   0.00899   0.00000   0.00375
  92        2S         -0.03814  -0.00911  -0.00238   0.00000   0.00482
  93        3PX        -0.00091  -0.00317   0.00191  -0.00001  -0.00016
  94        3PY        -0.00036   0.00197  -0.00129   0.00000   0.00003
  95        3PZ        -0.00001  -0.00001  -0.00004   0.00027   0.00000
                          11        12        13        14        15
  11        4YY         0.00180
  12        4ZZ        -0.00017   0.00045
  13        4XY        -0.00049  -0.00025   0.00275
  14        4XZ         0.00000   0.00000   0.00000   0.00038
  15        4YZ         0.00000   0.00000   0.00000   0.00063   0.00186
  16 2   C  1S         -0.00343   0.00081  -0.00676   0.00001   0.00001
  17        2S          0.00403  -0.00201   0.01154  -0.00001  -0.00001
  18        2PX         0.00904  -0.00142   0.00904  -0.00006   0.00002
  19        2PY        -0.00866  -0.00261   0.00680   0.00002  -0.00006
  20        2PZ        -0.00007   0.00011  -0.00002  -0.00973  -0.01208
  21        3S          0.00420   0.00019   0.01184   0.00000  -0.00010
  22        3PX         0.00613   0.00033   0.00156  -0.00001  -0.00007
  23        3PY        -0.00481  -0.00059   0.00383  -0.00001   0.00004
  24        3PZ         0.00000   0.00005  -0.00009  -0.00557  -0.00582
  25        4XX        -0.00060  -0.00010   0.00033   0.00001   0.00002
  26        4YY         0.00036  -0.00020  -0.00027   0.00001   0.00002
  27        4ZZ         0.00032   0.00010  -0.00004  -0.00003  -0.00003
  28        4XY         0.00023  -0.00025   0.00043  -0.00001  -0.00002
  29        4XZ        -0.00002   0.00000   0.00000   0.00005   0.00031
  30        4YZ         0.00003   0.00000   0.00000   0.00051   0.00105
  31 3   N  1S         -0.00991   0.00353  -0.00567   0.00000  -0.00001
  32        2S          0.01589  -0.00652   0.00832   0.00001   0.00001
  33        2PX        -0.01371   0.00439   0.02826   0.00003  -0.00003
  34        2PY         0.01610   0.00593  -0.00731  -0.00002  -0.00002
  35        2PZ        -0.00001   0.00000  -0.00002   0.00732   0.02564
  36        3S          0.01958  -0.00561   0.01514   0.00001   0.00010
  37        3PX        -0.00941   0.00232   0.02048   0.00002  -0.00003
  38        3PY         0.01296   0.00279  -0.00664  -0.00001  -0.00004
  39        3PZ        -0.00001   0.00000  -0.00002   0.00491   0.01791
  40        4XX         0.00045   0.00008  -0.00087   0.00000   0.00000
  41        4YY        -0.00155  -0.00033   0.00054   0.00000   0.00000
  42        4ZZ        -0.00002   0.00026  -0.00014   0.00000   0.00000
  43        4XY         0.00052  -0.00035  -0.00130   0.00000   0.00000
  44        4XZ         0.00000   0.00000   0.00000  -0.00013  -0.00058
  45        4YZ         0.00000   0.00000   0.00000  -0.00045  -0.00168
  46 4   O  1S         -0.00069  -0.00005   0.00243   0.00000   0.00000
  47        2S          0.00150   0.00012  -0.00548   0.00000  -0.00001
  48        2PX        -0.00474   0.00136   0.01490  -0.00002   0.00002
  49        2PY         0.00252  -0.00165  -0.01306   0.00000   0.00000
  50        2PZ         0.00010  -0.00001  -0.00001   0.00563  -0.00842
  51        3S          0.00306   0.00047  -0.00880   0.00000  -0.00002
  52        3PX        -0.00398   0.00082   0.01235  -0.00002   0.00001
  53        3PY         0.00278  -0.00128  -0.01175   0.00000   0.00000
  54        3PZ         0.00009  -0.00001  -0.00001   0.00456  -0.00709
  55        4XX        -0.00003   0.00001   0.00044   0.00000   0.00000
  56        4YY        -0.00009  -0.00011  -0.00020   0.00000   0.00000
  57        4ZZ        -0.00001  -0.00001   0.00003   0.00000   0.00000
  58        4XY         0.00013   0.00003  -0.00020   0.00000   0.00000
  59        4XZ         0.00000   0.00000   0.00000   0.00006  -0.00014
  60        4YZ         0.00000   0.00000   0.00000   0.00011   0.00001
  61 5   H  1S          0.00542   0.00019   0.00135  -0.00581  -0.00830
  62        2S          0.00361   0.00035  -0.00179  -0.00429  -0.00847
  63        3PX         0.00020  -0.00003   0.00019   0.00006   0.00007
  64        3PY        -0.00004  -0.00004   0.00030  -0.00017  -0.00020
  65        3PZ        -0.00030   0.00000  -0.00011   0.00002   0.00003
  66 6   H  1S         -0.00706  -0.00049   0.00091   0.00021   0.00020
  67        2S         -0.00524   0.00003  -0.00308   0.00018   0.00013
  68        3PX        -0.00006  -0.00008   0.00022   0.00001   0.00001
  69        3PY        -0.00002  -0.00004   0.00004  -0.00001  -0.00001
  70        3PZ        -0.00001   0.00000   0.00000  -0.00024  -0.00033
  71 7   H  1S          0.00590   0.00010   0.00130   0.00558   0.00809
  72        2S          0.00400   0.00028  -0.00192   0.00409   0.00838
  73        3PX         0.00019  -0.00003   0.00017  -0.00007  -0.00008
  74        3PY        -0.00002  -0.00004   0.00030   0.00017   0.00021
  75        3PZ         0.00031   0.00000   0.00011   0.00000   0.00001
  76 8   O  1S         -0.00031  -0.00004   0.00072   0.00000   0.00000
  77        2S          0.00112   0.00018  -0.00167   0.00000   0.00000
  78        2PX         0.00094   0.00048   0.00022   0.00000  -0.00001
  79        2PY         0.00132  -0.00050  -0.00500  -0.00001  -0.00001
  80        2PZ        -0.00004   0.00000   0.00000   0.00030   0.00053
  81        3S          0.00169  -0.00025  -0.00468   0.00000   0.00001
  82        3PX         0.00074   0.00039   0.00009   0.00000  -0.00002
  83        3PY         0.00117  -0.00050  -0.00477  -0.00001  -0.00001
  84        3PZ        -0.00004   0.00000   0.00000   0.00010   0.00098
  85        4XX         0.00006  -0.00004  -0.00036   0.00000   0.00000
  86        4YY        -0.00008   0.00008   0.00051   0.00000   0.00000
  87        4ZZ         0.00013   0.00003  -0.00001   0.00000   0.00000
  88        4XY         0.00006   0.00004  -0.00008   0.00000   0.00000
  89        4XZ         0.00000   0.00000   0.00000  -0.00015   0.00008
  90        4YZ         0.00000   0.00000   0.00000  -0.00008   0.00021
  91 9   H  1S         -0.00125  -0.00007   0.00265   0.00000   0.00000
  92        2S         -0.00160   0.00080   0.00660   0.00000   0.00000
  93        3PX         0.00023   0.00001  -0.00040   0.00000   0.00000
  94        3PY        -0.00005   0.00004   0.00032   0.00000   0.00000
  95        3PZ         0.00000   0.00000   0.00000   0.00005   0.00018
                          16        17        18        19        20
  16 2   C  1S          2.05579
  17        2S         -0.06962   0.29139
  18        2PX         0.00600  -0.00323   0.37758
  19        2PY         0.00544  -0.00589  -0.01885   0.38267
  20        2PZ         0.00004  -0.00015  -0.00010   0.00011   0.39787
  21        3S         -0.19266   0.28651  -0.02029  -0.01114  -0.00003
  22        3PX         0.00145  -0.00737   0.16610  -0.02136   0.00008
  23        3PY        -0.00061  -0.00201  -0.02261   0.17830   0.00027
  24        3PZ         0.00006  -0.00022  -0.00048  -0.00002   0.20499
  25        4XX        -0.00798  -0.00107  -0.00427   0.01225  -0.00043
  26        4YY        -0.00870   0.00030   0.00387   0.00291  -0.00048
  27        4ZZ        -0.00858   0.00033   0.00279  -0.01253   0.00092
  28        4XY        -0.00034   0.00050   0.01574   0.00659   0.00046
  29        4XZ         0.00000  -0.00001  -0.00047   0.00045   0.00445
  30        4YZ         0.00000   0.00001   0.00046  -0.00051  -0.01297
  31 3   N  1S         -0.00210   0.00379   0.00727   0.01231   0.00000
  32        2S          0.00494  -0.00871  -0.01489  -0.02734   0.00004
  33        2PX        -0.01403   0.03392   0.00913   0.05387  -0.00028
  34        2PY        -0.01558   0.03088   0.06338   0.05156   0.00005
  35        2PZ         0.00000   0.00010   0.00002   0.00014  -0.04407
  36        3S         -0.00118   0.00618  -0.01131  -0.02852  -0.00024
  37        3PX        -0.00908   0.02501   0.01117   0.04663  -0.00026
  38        3PY        -0.00661   0.01238   0.04047   0.03172   0.00020
  39        3PZ         0.00001   0.00006  -0.00006   0.00008  -0.03879
  40        4XX        -0.00076   0.00121   0.00187   0.00250   0.00001
  41        4YY         0.00244  -0.00382  -0.00486  -0.00325   0.00001
  42        4ZZ        -0.00056   0.00112   0.00217   0.00118   0.00001
  43        4XY         0.00029  -0.00114  -0.00055   0.00031   0.00002
  44        4XZ         0.00000   0.00000   0.00000   0.00000  -0.00051
  45        4YZ         0.00000  -0.00001   0.00000  -0.00002  -0.00022
  46 4   O  1S         -0.00310   0.00713   0.01178  -0.00093  -0.00015
  47        2S          0.00661  -0.01513  -0.02723   0.00146   0.00041
  48        2PX        -0.01565   0.04147   0.05082   0.02766  -0.00042
  49        2PY         0.01081  -0.02875  -0.04342  -0.02897   0.00023
  50        2PZ        -0.00018  -0.00016   0.00038  -0.00065  -0.03100
  51        3S          0.01219  -0.02625  -0.04887   0.00403   0.00058
  52        3PX        -0.01474   0.03358   0.04366   0.01977  -0.00017
  53        3PY         0.00930  -0.02582  -0.04182  -0.02551   0.00020
  54        3PZ        -0.00012  -0.00017   0.00026  -0.00056  -0.02607
  55        4XX        -0.00109   0.00224   0.00450  -0.00015  -0.00001
  56        4YY        -0.00031  -0.00027  -0.00101  -0.00141   0.00003
  57        4ZZ        -0.00049   0.00037   0.00011  -0.00055   0.00004
  58        4XY        -0.00041   0.00068  -0.00018  -0.00167  -0.00001
  59        4XZ        -0.00001   0.00001   0.00001  -0.00002  -0.00122
  60        4YZ         0.00000   0.00000   0.00000  -0.00001  -0.00028
  61 5   H  1S         -0.05492   0.10274   0.02250  -0.14936   0.21883
  62        2S         -0.00693   0.02481   0.01935  -0.10650   0.15796
  63        3PX         0.00073  -0.00084   0.00920  -0.00002  -0.00095
  64        3PY        -0.00280   0.00464   0.00027   0.00416   0.00806
  65        3PZ         0.00435  -0.00690  -0.00099   0.00789  -0.00103
  66 6   H  1S         -0.05455   0.09921  -0.23964   0.11609  -0.00635
  67        2S         -0.00527   0.01729  -0.18353   0.08710  -0.00465
  68        3PX        -0.00472   0.00758  -0.00443   0.00594  -0.00036
  69        3PY         0.00253  -0.00376   0.00549   0.00648   0.00016
  70        3PZ        -0.00013   0.00020  -0.00036   0.00018   0.00991
  71 7   H  1S         -0.05495   0.10294   0.03008  -0.15823  -0.21174
  72        2S         -0.00700   0.02507   0.02456  -0.11317  -0.15274
  73        3PX         0.00090  -0.00111   0.00906   0.00031   0.00131
  74        3PY        -0.00297   0.00492   0.00060   0.00349  -0.00821
  75        3PZ        -0.00420   0.00667   0.00133  -0.00807  -0.00031
  76 8   O  1S         -0.00040   0.00034  -0.00032   0.00310   0.00002
  77        2S         -0.00044   0.00103   0.00342  -0.00591  -0.00006
  78        2PX         0.00640  -0.01596  -0.02284   0.00322   0.00038
  79        2PY         0.00355  -0.00769  -0.00762   0.00250   0.00031
  80        2PZ         0.00010   0.00005  -0.00021   0.00025   0.01058
  81        3S          0.00615  -0.01102  -0.00563  -0.02233  -0.00004
  82        3PX         0.00374  -0.01094  -0.01830   0.00495   0.00033
  83        3PY         0.00262  -0.00708  -0.00811  -0.00451   0.00029
  84        3PZ         0.00007   0.00006  -0.00017   0.00022   0.00864
  85        4XX        -0.00007   0.00002  -0.00047  -0.00014  -0.00001
  86        4YY        -0.00083   0.00189   0.00245   0.00206  -0.00002
  87        4ZZ        -0.00053   0.00059   0.00080   0.00065   0.00001
  88        4XY         0.00025  -0.00016  -0.00041   0.00025  -0.00001
  89        4XZ         0.00000   0.00000  -0.00001   0.00001   0.00060
  90        4YZ         0.00001   0.00001  -0.00001   0.00002   0.00073
  91 9   H  1S         -0.00252   0.00722   0.00697   0.00967  -0.00005
  92        2S         -0.00493   0.01276   0.01107   0.02683  -0.00008
  93        3PX        -0.00003   0.00003   0.00066   0.00046   0.00001
  94        3PY        -0.00015   0.00024   0.00006   0.00067   0.00000
  95        3PZ         0.00000   0.00000  -0.00001   0.00001   0.00001
                          21        22        23        24        25
  21        3S          0.31396
  22        3PX        -0.00585   0.08236
  23        3PY         0.00257  -0.01505   0.08574
  24        3PZ        -0.00067  -0.00040   0.00045   0.11220
  25        4XX        -0.00118  -0.00234   0.00568  -0.00022   0.00095
  26        4YY        -0.00096   0.00121   0.00071  -0.00024  -0.00026
  27        4ZZ         0.00122   0.00151  -0.00575   0.00048  -0.00050
  28        4XY        -0.00159   0.00602   0.00213   0.00022   0.00002
  29        4XZ         0.00002  -0.00021   0.00022   0.00183   0.00002
  30        4YZ        -0.00001   0.00021  -0.00026  -0.00700  -0.00001
  31 3   N  1S          0.00715   0.00238   0.00621  -0.00007   0.00130
  32        2S         -0.00574   0.00036  -0.01315   0.00016  -0.00170
  33        2PX         0.08594  -0.00350   0.04870  -0.00120   0.00798
  34        2PY         0.10901   0.08621   0.03427   0.00031  -0.00137
  35        2PZ        -0.00075  -0.00086   0.00075  -0.02469   0.00015
  36        3S          0.03540   0.01165  -0.00616   0.00016  -0.00184
  37        3PX         0.05678  -0.00420   0.03741  -0.00096   0.00482
  38        3PY         0.05905   0.05798   0.01893   0.00032  -0.00069
  39        3PZ        -0.00078  -0.00084   0.00074  -0.01764   0.00011
  40        4XX         0.00149   0.00189   0.00088   0.00003  -0.00032
  41        4YY        -0.00956  -0.00650  -0.00223  -0.00003   0.00039
  42        4ZZ         0.00262   0.00188   0.00081   0.00000  -0.00001
  43        4XY        -0.00525  -0.00089  -0.00131   0.00007  -0.00045
  44        4XZ         0.00002   0.00002  -0.00002  -0.00026   0.00000
  45        4YZ         0.00004   0.00005  -0.00005   0.00023  -0.00001
  46 4   O  1S          0.01123  -0.00170   0.00078  -0.00040  -0.00105
  47        2S         -0.02566  -0.00009  -0.00164   0.00080   0.00245
  48        2PX         0.06422  -0.00749   0.02572  -0.00137  -0.01013
  49        2PY        -0.02291  -0.01334  -0.01988   0.00000   0.00668
  50        2PZ         0.00430   0.00435  -0.00480  -0.08767  -0.00001
  51        3S         -0.04309   0.00090  -0.00161   0.00140   0.00252
  52        3PX         0.04694  -0.00324   0.01843  -0.00084  -0.00707
  53        3PY        -0.02311  -0.01047  -0.01771   0.00016   0.00542
  54        3PZ         0.00357   0.00363  -0.00403  -0.07264  -0.00001
  55        4XX         0.00296   0.00100  -0.00002  -0.00006  -0.00008
  56        4YY         0.00019  -0.00105  -0.00070  -0.00002   0.00016
  57        4ZZ         0.00081  -0.00007  -0.00021   0.00001   0.00004
  58        4XY         0.00148  -0.00062  -0.00067  -0.00004  -0.00038
  59        4XZ         0.00002   0.00002  -0.00003  -0.00110   0.00000
  60        4YZ         0.00003   0.00003  -0.00004  -0.00100   0.00000
  61 5   H  1S          0.10317   0.01268  -0.07015   0.11302  -0.00587
  62        2S          0.02282   0.01213  -0.05140   0.07629  -0.00453
  63        3PX        -0.00127   0.00417  -0.00038  -0.00078  -0.00005
  64        3PY         0.00478  -0.00004   0.00198   0.00400   0.00014
  65        3PZ        -0.00692  -0.00061   0.00373  -0.00046   0.00027
  66 6   H  1S          0.10872  -0.11029   0.06292  -0.00315   0.00702
  67        2S          0.02390  -0.07867   0.04585  -0.00241   0.00680
  68        3PX         0.00772  -0.00223   0.00291  -0.00019   0.00015
  69        3PY        -0.00417   0.00230   0.00277   0.00008   0.00010
  70        3PZ         0.00022  -0.00016   0.00010   0.00507   0.00000
  71 7   H  1S          0.10281   0.01611  -0.07475  -0.10929  -0.00578
  72        2S          0.02157   0.01372  -0.05407  -0.07289  -0.00452
  73        3PX        -0.00158   0.00410  -0.00019   0.00096  -0.00003
  74        3PY         0.00503   0.00011   0.00166  -0.00408   0.00013
  75        3PZ         0.00666   0.00075  -0.00382  -0.00009  -0.00027
  76 8   O  1S          0.01062   0.00090   0.00543  -0.00007   0.00002
  77        2S         -0.01802   0.00036  -0.01116   0.00012  -0.00052
  78        2PX        -0.04078   0.00388  -0.00676   0.00111   0.00635
  79        2PY        -0.01964   0.01000  -0.00093   0.00093  -0.00108
  80        2PZ        -0.00210  -0.00173   0.00182   0.01682   0.00001
  81        3S         -0.04580  -0.00212  -0.02499   0.00041   0.00144
  82        3PX        -0.02775   0.00259  -0.00340   0.00081   0.00474
  83        3PY        -0.01721   0.00425  -0.00445   0.00065  -0.00102
  84        3PZ        -0.00181  -0.00154   0.00163   0.01611   0.00001
  85        4XX         0.00195  -0.00045   0.00031  -0.00006  -0.00007
  86        4YY         0.00299   0.00072   0.00158  -0.00003  -0.00045
  87        4ZZ         0.00138   0.00072   0.00047   0.00001  -0.00006
  88        4XY         0.00008  -0.00049   0.00005  -0.00003   0.00000
  89        4XZ        -0.00003  -0.00004   0.00005   0.00149   0.00000
  90        4YZ        -0.00011  -0.00011   0.00012   0.00179   0.00000
  91 9   H  1S          0.00970   0.00233   0.00743  -0.00004  -0.00166
  92        2S          0.02572   0.00587   0.01916  -0.00013  -0.00060
  93        3PX        -0.00108   0.00101  -0.00024   0.00005  -0.00014
  94        3PY         0.00109   0.00013   0.00063  -0.00001   0.00015
  95        3PZ        -0.00007  -0.00006   0.00006   0.00034   0.00000
                          26        27        28        29        30
  26        4YY         0.00057
  27        4ZZ         0.00001   0.00050
  28        4XY         0.00038  -0.00012   0.00090
  29        4XZ        -0.00001  -0.00001  -0.00001   0.00024
  30        4YZ         0.00002  -0.00002  -0.00001   0.00009   0.00075
  31 3   N  1S         -0.00029  -0.00050   0.00096   0.00000  -0.00001
  32        2S          0.00076   0.00122  -0.00147  -0.00001   0.00002
  33        2PX        -0.01221  -0.00080  -0.00328   0.00012  -0.00011
  34        2PY        -0.00209  -0.00158  -0.00107  -0.00004   0.00001
  35        2PZ         0.00014  -0.00026  -0.00010   0.00750   0.01275
  36        3S         -0.00185   0.00178  -0.00329  -0.00002   0.00004
  37        3PX        -0.00730  -0.00056  -0.00149   0.00008  -0.00007
  38        3PY        -0.00083  -0.00128  -0.00047  -0.00003   0.00000
  39        3PZ         0.00011  -0.00019  -0.00008   0.00470   0.00875
  40        4XX         0.00042  -0.00005   0.00017   0.00000   0.00000
  41        4YY        -0.00009   0.00004   0.00004   0.00001   0.00000
  42        4ZZ        -0.00009  -0.00003   0.00001   0.00000   0.00000
  43        4XY         0.00086  -0.00002   0.00032   0.00000   0.00000
  44        4XZ         0.00000   0.00000   0.00000  -0.00020  -0.00026
  45        4YZ        -0.00001   0.00001   0.00000  -0.00057  -0.00079
  46 4   O  1S          0.00005   0.00045   0.00093  -0.00002   0.00003
  47        2S         -0.00003  -0.00078  -0.00213   0.00004  -0.00006
  48        2PX         0.00506   0.00344   0.00340  -0.00009   0.00010
  49        2PY        -0.00457  -0.00213  -0.00115   0.00005  -0.00005
  50        2PZ         0.00004  -0.00016  -0.00008   0.00308   0.00209
  51        3S          0.00085  -0.00119  -0.00361   0.00007  -0.00010
  52        3PX         0.00360   0.00256   0.00267  -0.00007   0.00007
  53        3PY        -0.00348  -0.00181  -0.00137   0.00005  -0.00005
  54        3PZ         0.00003  -0.00013  -0.00007   0.00255   0.00171
  55        4XX        -0.00006   0.00007   0.00023  -0.00001   0.00001
  56        4YY        -0.00015  -0.00001   0.00001   0.00000   0.00000
  57        4ZZ        -0.00008   0.00000   0.00002   0.00000   0.00000
  58        4XY         0.00018   0.00014   0.00004   0.00000   0.00001
  59        4XZ         0.00000   0.00000   0.00000  -0.00005  -0.00002
  60        4YZ         0.00000   0.00000   0.00000   0.00005   0.00006
  61 5   H  1S         -0.00045   0.00576  -0.00126   0.00168  -0.00771
  62        2S          0.00011   0.00404  -0.00075   0.00090  -0.00629
  63        3PX         0.00007   0.00004   0.00038   0.00002   0.00008
  64        3PY         0.00000  -0.00011   0.00010   0.00012  -0.00023
  65        3PZ         0.00002  -0.00027   0.00009  -0.00001   0.00002
  66 6   H  1S         -0.00240  -0.00525  -0.00794   0.00037  -0.00020
  67        2S         -0.00288  -0.00460  -0.00650   0.00031  -0.00015
  68        3PX         0.00009  -0.00019  -0.00004   0.00001   0.00000
  69        3PY         0.00015  -0.00018   0.00036   0.00000  -0.00001
  70        3PZ        -0.00001   0.00002   0.00000   0.00011  -0.00033
  71 7   H  1S          0.00014   0.00507  -0.00160  -0.00204   0.00791
  72        2S          0.00063   0.00355  -0.00100  -0.00121   0.00643
  73        3PX         0.00006   0.00003   0.00038  -0.00003  -0.00007
  74        3PY         0.00002  -0.00012   0.00008  -0.00012   0.00023
  75        3PZ        -0.00002   0.00028  -0.00008  -0.00002   0.00002
  76 8   O  1S          0.00005  -0.00004   0.00001   0.00000   0.00000
  77        2S          0.00008   0.00015   0.00015  -0.00002   0.00001
  78        2PX        -0.00384  -0.00206  -0.00228   0.00008  -0.00009
  79        2PY         0.00241  -0.00024  -0.00075   0.00000  -0.00002
  80        2PZ         0.00000   0.00005   0.00001  -0.00203  -0.00167
  81        3S         -0.00077  -0.00036  -0.00011  -0.00001   0.00001
  82        3PX        -0.00289  -0.00157  -0.00179   0.00006  -0.00007
  83        3PY         0.00205  -0.00003  -0.00042  -0.00001  -0.00001
  84        3PZ         0.00000   0.00005   0.00001  -0.00166  -0.00127
  85        4XX         0.00001   0.00002   0.00003   0.00000   0.00000
  86        4YY         0.00027   0.00012   0.00010   0.00000   0.00000
  87        4ZZ         0.00003   0.00000   0.00002   0.00000   0.00000
  88        4XY        -0.00002  -0.00001   0.00001   0.00000   0.00000
  89        4XZ         0.00000   0.00000   0.00000  -0.00003  -0.00004
  90        4YZ         0.00000   0.00000   0.00000  -0.00007  -0.00004
  91 9   H  1S          0.00093   0.00050   0.00005  -0.00001   0.00001
  92        2S         -0.00037   0.00009  -0.00022   0.00001  -0.00001
  93        3PX         0.00021  -0.00001   0.00003   0.00000   0.00000
  94        3PY        -0.00015  -0.00004  -0.00004   0.00000   0.00000
  95        3PZ         0.00000   0.00000   0.00000  -0.00001   0.00003
                          31        32        33        34        35
  31 3   N  1S          2.07705
  32        2S         -0.14491   0.42881
  33        2PX        -0.01253   0.02087   0.51037
  34        2PY        -0.03769   0.08289   0.01906   0.51122
  35        2PZ        -0.00004   0.00001   0.00014  -0.00012   0.41191
  36        3S         -0.27309   0.54209   0.13738   0.18965   0.00095
  37        3PX        -0.01271   0.02609   0.34138  -0.00743  -0.00007
  38        3PY        -0.03506   0.09048  -0.02355   0.34537  -0.00036
  39        3PZ        -0.00004   0.00002   0.00001  -0.00005   0.27976
  40        4XX        -0.00697  -0.00564  -0.01362   0.00867  -0.00001
  41        4YY        -0.00305  -0.01198   0.00300  -0.03908   0.00001
  42        4ZZ        -0.00669  -0.00689   0.00188   0.00787  -0.00005
  43        4XY         0.00193  -0.00225  -0.02920  -0.00792   0.00000
  44        4XZ         0.00000   0.00000  -0.00001   0.00000  -0.00977
  45        4YZ         0.00000   0.00000   0.00000  -0.00001  -0.02847
  46 4   O  1S         -0.00032   0.00062   0.01337  -0.00828   0.00004
  47        2S          0.00081  -0.00116  -0.03060   0.02108  -0.00007
  48        2PX        -0.00343   0.00707   0.09194  -0.07155   0.00006
  49        2PY         0.00312  -0.01039  -0.08652   0.08222   0.00018
  50        2PZ         0.00004   0.00026  -0.00035   0.00003  -0.05739
  51        3S         -0.00035   0.00219  -0.06653   0.03241  -0.00029
  52        3PX        -0.00225   0.00396   0.08186  -0.07069   0.00005
  53        3PY         0.00103  -0.00514  -0.08487   0.07119   0.00011
  54        3PZ         0.00003   0.00022  -0.00035   0.00001  -0.04999
  55        4XX         0.00008   0.00003   0.00389   0.00126   0.00002
  56        4YY         0.00005  -0.00062  -0.00029  -0.00014   0.00001
  57        4ZZ         0.00007   0.00009   0.00076   0.00058   0.00001
  58        4XY        -0.00001   0.00004  -0.00455   0.00190   0.00001
  59        4XZ         0.00000   0.00000   0.00000   0.00000  -0.00210
  60        4YZ         0.00000   0.00000  -0.00001   0.00000   0.00121
  61 5   H  1S         -0.00305   0.00712  -0.02189  -0.00837  -0.05253
  62        2S         -0.00142   0.00335  -0.03861  -0.01335  -0.07226
  63        3PX         0.00026  -0.00060   0.00056   0.00189   0.00116
  64        3PY         0.00044  -0.00084   0.00216   0.00175   0.00009
  65        3PZ         0.00009  -0.00017   0.00091   0.00018   0.00003
  66 6   H  1S          0.00059  -0.00188   0.04173  -0.01156   0.00151
  67        2S         -0.00108   0.00287   0.02148   0.00896   0.00125
  68        3PX         0.00020  -0.00046  -0.00022   0.00153  -0.00001
  69        3PY         0.00031  -0.00058  -0.00071   0.00181  -0.00007
  70        3PZ         0.00000   0.00000   0.00003   0.00001  -0.00145
  71 7   H  1S         -0.00320   0.00744  -0.02411  -0.00830   0.05097
  72        2S         -0.00157   0.00360  -0.04237  -0.01363   0.07128
  73        3PX         0.00027  -0.00060   0.00058   0.00197  -0.00113
  74        3PY         0.00043  -0.00082   0.00212   0.00174   0.00001
  75        3PZ        -0.00009   0.00018  -0.00096  -0.00020  -0.00006
  76 8   O  1S         -0.00143   0.00346   0.01283  -0.00182   0.00000
  77        2S          0.00320  -0.00691  -0.03182   0.01248  -0.00001
  78        2PX        -0.00909   0.02551   0.02830   0.00037  -0.00005
  79        2PY         0.01238  -0.02888  -0.05730  -0.00518  -0.00019
  80        2PZ        -0.00001  -0.00008   0.00015   0.00001   0.00194
  81        3S          0.00753  -0.01615  -0.07374  -0.01131   0.00000
  82        3PX        -0.00754   0.02049   0.02443   0.00823  -0.00007
  83        3PY         0.01027  -0.02409  -0.06266  -0.01088  -0.00017
  84        3PZ        -0.00001  -0.00007   0.00012   0.00001   0.00749
  85        4XX         0.00007  -0.00033  -0.00197   0.00522   0.00001
  86        4YY         0.00005   0.00018   0.00380   0.00013  -0.00001
  87        4ZZ        -0.00025   0.00093  -0.00007   0.00360   0.00000
  88        4XY        -0.00022   0.00085  -0.00140   0.00206   0.00000
  89        4XZ         0.00000   0.00000   0.00000   0.00001  -0.00014
  90        4YZ         0.00000  -0.00001   0.00001   0.00000   0.00199
  91 9   H  1S         -0.00036  -0.00328   0.03609  -0.00993  -0.00001
  92        2S         -0.00905   0.01935   0.09548   0.01539   0.00006
  93        3PX         0.00072  -0.00183  -0.00670   0.00203  -0.00002
  94        3PY        -0.00084   0.00213   0.00504   0.00088   0.00000
  95        3PZ         0.00000   0.00000   0.00000   0.00000   0.00262
                          36        37        38        39        40
  36        3S          0.73042
  37        3PX         0.10442   0.23251
  38        3PY         0.16006  -0.02985   0.24117
  39        3PZ         0.00084  -0.00015  -0.00027   0.19274
  40        4XX        -0.00780  -0.00915   0.00590  -0.00001   0.00082
  41        4YY        -0.02050   0.00286  -0.02676   0.00000  -0.00078
  42        4ZZ        -0.00621   0.00065   0.00440  -0.00004   0.00024
  43        4XY        -0.01012  -0.01883  -0.00358   0.00001   0.00072
  44        4XZ        -0.00002   0.00000   0.00001  -0.00656   0.00000
  45        4YZ        -0.00006   0.00001   0.00001  -0.01915   0.00000
  46 4   O  1S         -0.00105   0.01018  -0.00497   0.00000  -0.00043
  47        2S          0.00258  -0.02319   0.01345   0.00001   0.00097
  48        2PX         0.04282   0.09437  -0.07879  -0.00003   0.00019
  49        2PY        -0.03940  -0.08111   0.08538   0.00018  -0.00087
  50        2PZ        -0.00322   0.00048   0.00100  -0.07778   0.00006
  51        3S          0.00167  -0.04911   0.02150  -0.00013   0.00271
  52        3PX         0.02882   0.07939  -0.07120   0.00000  -0.00036
  53        3PY        -0.03061  -0.07684   0.07343   0.00014  -0.00031
  54        3PZ        -0.00270   0.00036   0.00083  -0.06685   0.00005
  55        4XX         0.00162   0.00282   0.00053   0.00001  -0.00020
  56        4YY        -0.00147  -0.00043   0.00063   0.00001  -0.00004
  57        4ZZ        -0.00008   0.00029   0.00067   0.00001  -0.00006
  58        4XY         0.00038  -0.00247   0.00111   0.00001   0.00020
  59        4XZ        -0.00001   0.00000   0.00000  -0.00134   0.00000
  60        4YZ        -0.00003   0.00000   0.00001   0.00064   0.00000
  61 5   H  1S          0.01020  -0.01675  -0.00713  -0.04034   0.00004
  62        2S         -0.00167  -0.02716  -0.00807  -0.05559   0.00046
  63        3PX        -0.00053   0.00040   0.00125   0.00064   0.00003
  64        3PY        -0.00042   0.00152   0.00093  -0.00021   0.00003
  65        3PZ        -0.00036   0.00079   0.00021   0.00009   0.00000
  66 6   H  1S          0.00357   0.02613  -0.00968   0.00115  -0.00100
  67        2S          0.00502   0.00778   0.00978   0.00079  -0.00119
  68        3PX        -0.00033   0.00009   0.00083   0.00000   0.00013
  69        3PY        -0.00090  -0.00017   0.00126  -0.00005   0.00012
  70        3PZ        -0.00001   0.00002   0.00001  -0.00122   0.00000
  71 7   H  1S          0.01076  -0.01828  -0.00720   0.03920   0.00007
  72        2S         -0.00091  -0.02974  -0.00850   0.05522   0.00055
  73        3PX        -0.00053   0.00039   0.00132  -0.00062   0.00003
  74        3PY        -0.00037   0.00147   0.00092   0.00028   0.00003
  75        3PZ         0.00036  -0.00083  -0.00021   0.00001   0.00000
  76 8   O  1S         -0.00245   0.01011  -0.00076   0.00000  -0.00003
  77        2S          0.00552  -0.02311   0.00792   0.00000   0.00070
  78        2PX         0.03566   0.00006   0.00807  -0.00001  -0.00585
  79        2PY        -0.05419  -0.03523  -0.00437  -0.00010   0.00694
  80        2PZ         0.00112  -0.00017  -0.00033   0.02701  -0.00002
  81        3S         -0.02179  -0.06002   0.00036   0.00004  -0.00111
  82        3PX         0.03146   0.00290   0.01072  -0.00004  -0.00409
  83        3PY        -0.04815  -0.04007  -0.00625  -0.00010   0.00479
  84        3PZ         0.00102  -0.00015  -0.00030   0.02686  -0.00002
  85        4XX        -0.00030  -0.00108   0.00384   0.00000   0.00025
  86        4YY         0.00210   0.00405  -0.00148  -0.00001   0.00030
  87        4ZZ         0.00156  -0.00002   0.00240   0.00000   0.00010
  88        4XY         0.00182  -0.00109   0.00148  -0.00001  -0.00017
  89        4XZ         0.00003  -0.00001  -0.00001   0.00001   0.00000
  90        4YZ         0.00008  -0.00001  -0.00003   0.00244   0.00000
  91 9   H  1S          0.00510   0.03310  -0.01497  -0.00001   0.00281
  92        2S          0.04898   0.07117  -0.00120   0.00004   0.00008
  93        3PX        -0.00284  -0.00446   0.00137  -0.00001   0.00040
  94        3PY         0.00334   0.00307   0.00057   0.00000  -0.00031
  95        3PZ         0.00004  -0.00001  -0.00001   0.00254   0.00000
                          41        42        43        44        45
  41        4YY         0.00326
  42        4ZZ        -0.00044   0.00036
  43        4XY         0.00028  -0.00018   0.00190
  44        4XZ         0.00000   0.00000   0.00000   0.00025
  45        4YZ         0.00000   0.00000   0.00000   0.00069   0.00200
  46 4   O  1S          0.00045  -0.00001  -0.00043   0.00000   0.00000
  47        2S         -0.00112   0.00010   0.00080   0.00000   0.00000
  48        2PX         0.00063  -0.00032   0.00024   0.00000   0.00001
  49        2PY        -0.00134  -0.00095  -0.00214  -0.00001  -0.00001
  50        2PZ         0.00005   0.00009  -0.00004   0.00207   0.00198
  51        3S         -0.00268   0.00063   0.00345   0.00000   0.00001
  52        3PX         0.00185  -0.00038  -0.00024   0.00000   0.00000
  53        3PY        -0.00158  -0.00057  -0.00071  -0.00001   0.00000
  54        3PZ         0.00004   0.00007  -0.00003   0.00166   0.00184
  55        4XX        -0.00002   0.00005  -0.00022   0.00000   0.00000
  56        4YY         0.00013  -0.00017  -0.00028   0.00000   0.00000
  57        4ZZ         0.00001  -0.00001  -0.00010   0.00000   0.00000
  58        4XY        -0.00027  -0.00003   0.00021   0.00000   0.00000
  59        4XZ         0.00000   0.00000   0.00000   0.00010   0.00013
  60        4YZ         0.00000   0.00000   0.00000   0.00002  -0.00012
  61 5   H  1S         -0.00045  -0.00004   0.00040   0.00041   0.00186
  62        2S          0.00024  -0.00022   0.00158   0.00114   0.00358
  63        3PX        -0.00012   0.00006  -0.00005  -0.00002  -0.00008
  64        3PY        -0.00012   0.00006  -0.00009  -0.00003  -0.00008
  65        3PZ         0.00003  -0.00001   0.00000   0.00000   0.00001
  66 6   H  1S          0.00127  -0.00053  -0.00152  -0.00001  -0.00006
  67        2S          0.00066  -0.00030  -0.00160  -0.00001  -0.00006
  68        3PX        -0.00018   0.00003   0.00009   0.00000   0.00000
  69        3PY        -0.00014   0.00004   0.00010   0.00000   0.00000
  70        3PZ         0.00000   0.00000   0.00000   0.00000   0.00002
  71 7   H  1S         -0.00051  -0.00005   0.00045  -0.00040  -0.00181
  72        2S          0.00016  -0.00026   0.00178  -0.00113  -0.00353
  73        3PX        -0.00012   0.00006  -0.00005   0.00002   0.00008
  74        3PY        -0.00013   0.00006  -0.00009   0.00003   0.00007
  75        3PZ        -0.00003   0.00001   0.00000   0.00000   0.00001
  76 8   O  1S          0.00009  -0.00002  -0.00050   0.00000   0.00000
  77        2S         -0.00116   0.00016   0.00111   0.00000   0.00000
  78        2PX         0.00316   0.00255   0.00040  -0.00001   0.00000
  79        2PY        -0.00226  -0.00150   0.00175   0.00001   0.00000
  80        2PZ        -0.00002  -0.00002   0.00002   0.00249  -0.00029
  81        3S          0.00222   0.00072   0.00401   0.00000   0.00000
  82        3PX         0.00166   0.00180  -0.00024  -0.00001   0.00000
  83        3PY        -0.00087  -0.00104   0.00268   0.00000   0.00000
  84        3PZ        -0.00001  -0.00002   0.00001   0.00180  -0.00057
  85        4XX        -0.00040  -0.00013  -0.00024   0.00000   0.00000
  86        4YY        -0.00032  -0.00003  -0.00009   0.00000   0.00000
  87        4ZZ        -0.00031   0.00004  -0.00003   0.00000   0.00000
  88        4XY        -0.00007   0.00010   0.00013   0.00000   0.00000
  89        4XZ         0.00000   0.00000   0.00000  -0.00008   0.00005
  90        4YZ         0.00000   0.00000   0.00000  -0.00002  -0.00011
  91 9   H  1S         -0.00133  -0.00152  -0.00294   0.00001   0.00000
  92        2S         -0.00245  -0.00008  -0.00504   0.00000  -0.00001
  93        3PX        -0.00029   0.00004   0.00037   0.00000   0.00000
  94        3PY         0.00005   0.00010  -0.00018   0.00000   0.00000
  95        3PZ         0.00000   0.00000   0.00000   0.00001  -0.00019
                          46        47        48        49        50
  46 4   O  1S          2.08437
  47        2S         -0.19209   0.53510
  48        2PX         0.02170  -0.04086   0.51109
  49        2PY         0.02694  -0.03566  -0.17821   0.57849
  50        2PZ         0.00006  -0.00026  -0.00045  -0.00081   0.80127
  51        3S         -0.27499   0.62322  -0.12693  -0.17825   0.00005
  52        3PX         0.01333  -0.03125   0.35372  -0.17396  -0.00071
  53        3PY         0.01646  -0.02257  -0.17587   0.43146  -0.00061
  54        3PZ         0.00002  -0.00018  -0.00054  -0.00079   0.66097
  55        4XX        -0.01021  -0.00216   0.01455   0.01267   0.00000
  56        4YY        -0.01012  -0.00192   0.00032   0.02619  -0.00005
  57        4ZZ        -0.00674  -0.00997  -0.00163   0.00624  -0.00002
  58        4XY        -0.00116   0.00250   0.01570   0.01055  -0.00001
  59        4XZ         0.00000   0.00000   0.00006   0.00001   0.00628
  60        4YZ        -0.00001   0.00003   0.00001   0.00003   0.00961
  61 5   H  1S          0.00326  -0.00673   0.01383  -0.00762  -0.01433
  62        2S         -0.00190   0.00370   0.00183  -0.01080   0.05514
  63        3PX         0.00001   0.00009  -0.00029  -0.00089   0.00291
  64        3PY         0.00007  -0.00021   0.00062  -0.00040   0.00079
  65        3PZ        -0.00002   0.00009   0.00014   0.00014  -0.00071
  66 6   H  1S         -0.00600   0.01412  -0.03565   0.02728   0.00062
  67        2S         -0.01023   0.02207  -0.09161   0.06024   0.00324
  68        3PX         0.00007  -0.00023   0.00166  -0.00128   0.00005
  69        3PY         0.00003  -0.00004   0.00139  -0.00142   0.00000
  70        3PZ        -0.00001   0.00002  -0.00005   0.00004  -0.00028
  71 7   H  1S          0.00352  -0.00742   0.01470  -0.00863   0.01294
  72        2S         -0.00208   0.00384   0.00286  -0.01327  -0.06169
  73        3PX        -0.00008   0.00026  -0.00058  -0.00085  -0.00309
  74        3PY         0.00008  -0.00024   0.00060  -0.00038  -0.00090
  75        3PZ         0.00002  -0.00008  -0.00015  -0.00019  -0.00073
  76 8   O  1S         -0.00551   0.01381  -0.01221  -0.02292  -0.00005
  77        2S          0.01330  -0.03239   0.04095   0.05814   0.00016
  78        2PX         0.01168  -0.04368  -0.24282  -0.18505  -0.00063
  79        2PY         0.00351  -0.01976  -0.19315  -0.16725  -0.00032
  80        2PZ         0.00002  -0.00003  -0.00053  -0.00030  -0.09508
  81        3S          0.04577  -0.10776  -0.05769   0.06859   0.00000
  82        3PX        -0.00596   0.00073  -0.16834  -0.12102  -0.00033
  83        3PY        -0.00845   0.01214  -0.11735  -0.09010  -0.00009
  84        3PZ        -0.00002   0.00007  -0.00029  -0.00011  -0.10569
  85        4XX        -0.00409   0.01137   0.00886   0.02709   0.00007
  86        4YY        -0.00226   0.00546   0.01523  -0.01497   0.00006
  87        4ZZ         0.00022  -0.00053   0.00029  -0.00073  -0.00007
  88        4XY        -0.00495   0.01198   0.01063   0.00814   0.00006
  89        4XZ        -0.00001   0.00004   0.00005   0.00008  -0.01383
  90        4YZ        -0.00001   0.00003   0.00006   0.00002  -0.01552
  91 9   H  1S          0.00241  -0.00833   0.01500  -0.06088   0.00000
  92        2S         -0.00563   0.00852   0.04000  -0.12520  -0.00026
  93        3PX        -0.00006  -0.00049  -0.00503  -0.00792   0.00000
  94        3PY        -0.00009   0.00049  -0.00067  -0.00420  -0.00001
  95        3PZ         0.00000   0.00000  -0.00001  -0.00001  -0.00328
                          51        52        53        54        55
  51        3S          0.79924
  52        3PX        -0.07580   0.25181
  53        3PY        -0.11424  -0.15852   0.32718
  54        3PZ         0.00018  -0.00069  -0.00058   0.54683
  55        4XX        -0.01116   0.00805   0.00761  -0.00001   0.00146
  56        4YY        -0.01099  -0.00209   0.01824  -0.00005   0.00084
  57        4ZZ        -0.01247  -0.00140   0.00467  -0.00002   0.00017
  58        4XY        -0.00480   0.00869   0.00604  -0.00002   0.00106
  59        4XZ        -0.00002   0.00003   0.00000   0.00459   0.00000
  60        4YZ         0.00001   0.00000   0.00002   0.00740   0.00000
  61 5   H  1S         -0.01110   0.01158  -0.00625  -0.01201   0.00091
  62        2S          0.00794   0.00245  -0.00700   0.04592  -0.00028
  63        3PX        -0.00002   0.00003  -0.00077   0.00242   0.00006
  64        3PY        -0.00048   0.00051  -0.00043   0.00064   0.00005
  65        3PZ         0.00020  -0.00002   0.00007  -0.00059  -0.00004
  66 6   H  1S          0.02324  -0.02832   0.02478   0.00055  -0.00203
  67        2S          0.03572  -0.06931   0.05351   0.00276  -0.00258
  68        3PX        -0.00009   0.00115  -0.00101   0.00004   0.00000
  69        3PY         0.00000   0.00102  -0.00121   0.00000   0.00002
  70        3PZ         0.00004  -0.00004   0.00004  -0.00025   0.00000
  71 7   H  1S         -0.01210   0.01220  -0.00707   0.01083   0.00098
  72        2S          0.00855   0.00334  -0.00881  -0.05141  -0.00031
  73        3PX         0.00024  -0.00017  -0.00072  -0.00257   0.00005
  74        3PY        -0.00055   0.00050  -0.00041  -0.00074   0.00006
  75        3PZ        -0.00019   0.00003  -0.00011  -0.00061   0.00004
  76 8   O  1S          0.03980   0.00296  -0.01002  -0.00001  -0.00457
  77        2S         -0.09564   0.00150   0.02650   0.00006   0.01135
  78        2PX         0.06653  -0.14987  -0.10361  -0.00030  -0.00767
  79        2PY         0.08661  -0.10565  -0.11158  -0.00007  -0.02116
  80        2PZ         0.00004  -0.00019  -0.00019  -0.11451  -0.00007
  81        3S         -0.15852  -0.06715   0.04719  -0.00004   0.01085
  82        3PX         0.07700  -0.10581  -0.06747  -0.00012  -0.00472
  83        3PY         0.07859  -0.06564  -0.05841   0.00005  -0.01272
  84        3PZ         0.00006  -0.00006  -0.00007  -0.11572  -0.00005
  85        4XX         0.00204   0.00338   0.01823   0.00004   0.00092
  86        4YY         0.00687   0.01157  -0.01262   0.00005  -0.00018
  87        4ZZ         0.00004   0.00038  -0.00041  -0.00005  -0.00012
  88        4XY         0.00791   0.00542   0.00532   0.00005   0.00115
  89        4XZ         0.00001   0.00003   0.00006  -0.01043   0.00000
  90        4YZ         0.00001   0.00004   0.00001  -0.01340   0.00000
  91 9   H  1S         -0.00154   0.01838  -0.05596   0.00001  -0.00536
  92        2S          0.03584   0.04240  -0.09842  -0.00019  -0.00484
  93        3PX         0.00309  -0.00316  -0.00555   0.00000  -0.00046
  94        3PY         0.00282   0.00041  -0.00223   0.00000  -0.00010
  95        3PZ         0.00000   0.00000  -0.00001  -0.00378   0.00000
                          56        57        58        59        60
  56        4YY         0.00173
  57        4ZZ         0.00033   0.00031
  58        4XY         0.00090  -0.00002   0.00127
  59        4XZ         0.00000   0.00000   0.00000   0.00029
  60        4YZ         0.00000   0.00000   0.00000   0.00026   0.00029
  61 5   H  1S          0.00021   0.00027   0.00115  -0.00048  -0.00022
  62        2S         -0.00032  -0.00012   0.00061   0.00015   0.00037
  63        3PX        -0.00005  -0.00001  -0.00006   0.00001   0.00003
  64        3PY        -0.00001   0.00001  -0.00002  -0.00002   0.00001
  65        3PZ        -0.00001  -0.00001  -0.00003   0.00000  -0.00001
  66 6   H  1S          0.00057   0.00012  -0.00094   0.00000   0.00001
  67        2S          0.00089   0.00024  -0.00203   0.00000   0.00002
  68        3PX        -0.00004  -0.00001   0.00003   0.00000   0.00000
  69        3PY        -0.00006  -0.00003  -0.00001   0.00000   0.00000
  70        3PZ         0.00000   0.00000   0.00000  -0.00002   0.00000
  71 7   H  1S          0.00016   0.00022   0.00120   0.00048   0.00021
  72        2S         -0.00044  -0.00018   0.00064  -0.00016  -0.00041
  73        3PX        -0.00005  -0.00001  -0.00008  -0.00001  -0.00003
  74        3PY        -0.00001   0.00001  -0.00002   0.00002  -0.00001
  75        3PZ         0.00001   0.00001   0.00003   0.00000  -0.00001
  76 8   O  1S         -0.00239   0.00065  -0.00473  -0.00002  -0.00001
  77        2S          0.00661  -0.00154   0.01222   0.00004   0.00003
  78        2PX        -0.02163  -0.00121  -0.01683  -0.00007  -0.00007
  79        2PY        -0.00293  -0.00112  -0.01100  -0.00007  -0.00003
  80        2PZ        -0.00004   0.00008  -0.00007   0.01292   0.01066
  81        3S          0.00177  -0.00030   0.00777   0.00003   0.00002
  82        3PX        -0.01430  -0.00141  -0.01079  -0.00005  -0.00005
  83        3PY        -0.00145  -0.00098  -0.00609  -0.00004  -0.00002
  84        3PZ        -0.00002   0.00007  -0.00004   0.00995   0.00808
  85        4XX         0.00193   0.00007   0.00135   0.00000   0.00001
  86        4YY        -0.00010  -0.00026   0.00032   0.00000   0.00000
  87        4ZZ        -0.00006   0.00003  -0.00008   0.00000   0.00000
  88        4XY         0.00018  -0.00018   0.00083   0.00000   0.00000
  89        4XZ         0.00001   0.00000   0.00001  -0.00047  -0.00049
  90        4YZ         0.00000   0.00000   0.00000   0.00010   0.00001
  91 9   H  1S          0.00469  -0.00075   0.00107  -0.00001   0.00001
  92        2S         -0.00250  -0.00108  -0.00268  -0.00001  -0.00001
  93        3PX        -0.00026  -0.00014  -0.00011   0.00000   0.00000
  94        3PY        -0.00068   0.00004  -0.00055   0.00000   0.00000
  95        3PZ         0.00000   0.00000   0.00000   0.00037   0.00032
                          61        62        63        64        65
  61 5   H  1S          0.21716
  62        2S          0.14191   0.10886
  63        3PX        -0.00053  -0.00004   0.00025
  64        3PY         0.00436   0.00235  -0.00001   0.00030
  65        3PZ        -0.00605  -0.00326   0.00000  -0.00005   0.00033
  66 6   H  1S         -0.02517  -0.03791  -0.00585   0.00255   0.00044
  67        2S         -0.04045  -0.03446  -0.00414   0.00107   0.00163
  68        3PX         0.00008  -0.00120  -0.00013   0.00017  -0.00005
  69        3PY        -0.00341  -0.00169   0.00015   0.00002   0.00021
  70        3PZ         0.00546   0.00397  -0.00003   0.00021  -0.00003
  71 7   H  1S         -0.01979  -0.03353   0.00083  -0.00431  -0.00514
  72        2S         -0.03330  -0.03632   0.00062  -0.00401  -0.00249
  73        3PX         0.00064   0.00055   0.00021   0.00002   0.00001
  74        3PY        -0.00408  -0.00389   0.00002  -0.00005  -0.00002
  75        3PZ         0.00533   0.00267   0.00000   0.00001  -0.00032
  76 8   O  1S         -0.00075  -0.00040   0.00001   0.00003   0.00004
  77        2S          0.00236   0.00110  -0.00003   0.00000  -0.00009
  78        2PX        -0.01359  -0.00687   0.00046   0.00002   0.00016
  79        2PY        -0.00033   0.01135   0.00031  -0.00033  -0.00011
  80        2PZ         0.00792  -0.01001  -0.00100  -0.00015   0.00019
  81        3S          0.00221   0.00262  -0.00002  -0.00035  -0.00025
  82        3PX        -0.01075  -0.00581   0.00031   0.00007   0.00016
  83        3PY         0.00187   0.00968   0.00009  -0.00036  -0.00016
  84        3PZ         0.00606  -0.01083  -0.00089  -0.00016   0.00018
  85        4XX         0.00008  -0.00028  -0.00005   0.00000   0.00001
  86        4YY         0.00041   0.00034   0.00002   0.00004   0.00001
  87        4ZZ         0.00005  -0.00004   0.00002   0.00002   0.00000
  88        4XY        -0.00022  -0.00039  -0.00003   0.00001   0.00002
  89        4XZ         0.00030  -0.00061  -0.00004  -0.00001   0.00001
  90        4YZ         0.00032  -0.00124  -0.00006  -0.00001   0.00002
  91 9   H  1S          0.00094   0.00219   0.00010   0.00014   0.00005
  92        2S         -0.00512  -0.00533   0.00028   0.00055   0.00032
  93        3PX         0.00012   0.00062   0.00003  -0.00001  -0.00001
  94        3PY        -0.00036  -0.00054   0.00001   0.00002   0.00001
  95        3PZ        -0.00011  -0.00076  -0.00002   0.00000   0.00001
                          66        67        68        69        70
  66 6   H  1S          0.21778
  67        2S          0.14989   0.12163
  68        3PX         0.00684   0.00354   0.00035
  69        3PY        -0.00303  -0.00171  -0.00005   0.00025
  70        3PZ         0.00018   0.00011   0.00000   0.00000   0.00025
  71 7   H  1S         -0.02533  -0.04080   0.00025  -0.00362  -0.00532
  72        2S         -0.03810  -0.03535  -0.00107  -0.00185  -0.00394
  73        3PX        -0.00580  -0.00404  -0.00013   0.00016   0.00002
  74        3PY         0.00252   0.00098   0.00018   0.00000  -0.00020
  75        3PZ        -0.00076  -0.00184   0.00004  -0.00020  -0.00001
  76 8   O  1S          0.00044  -0.00290   0.00001   0.00004   0.00000
  77        2S         -0.00275   0.00364   0.00008  -0.00003   0.00000
  78        2PX         0.02691   0.05470  -0.00071  -0.00069   0.00003
  79        2PY        -0.00223   0.00241   0.00033   0.00045   0.00001
  80        2PZ        -0.00032  -0.00155  -0.00002   0.00002   0.00047
  81        3S          0.00052   0.02162  -0.00054  -0.00052   0.00000
  82        3PX         0.02155   0.04111  -0.00045  -0.00048   0.00003
  83        3PY        -0.00275   0.00068   0.00015   0.00021   0.00001
  84        3PZ        -0.00026  -0.00135  -0.00002   0.00001   0.00036
  85        4XX        -0.00001  -0.00051   0.00001   0.00000   0.00000
  86        4YY        -0.00156  -0.00381   0.00010   0.00010   0.00000
  87        4ZZ        -0.00025  -0.00040   0.00003   0.00002   0.00000
  88        4XY         0.00028   0.00017   0.00000   0.00000   0.00000
  89        4XZ        -0.00001  -0.00003   0.00000   0.00000   0.00000
  90        4YZ        -0.00002  -0.00009   0.00000   0.00000   0.00001
  91 9   H  1S         -0.00458  -0.01434   0.00042   0.00040   0.00000
  92        2S          0.00219  -0.01015   0.00058   0.00052   0.00000
  93        3PX        -0.00067  -0.00028   0.00004   0.00005   0.00000
  94        3PY         0.00064   0.00065  -0.00001  -0.00001   0.00000
  95        3PZ         0.00000  -0.00004   0.00000   0.00000   0.00000
                          71        72        73        74        75
  71 7   H  1S          0.21722
  72        2S          0.14231   0.11061
  73        3PX        -0.00077  -0.00012   0.00025
  74        3PY         0.00460   0.00249  -0.00001   0.00030
  75        3PZ         0.00586   0.00317   0.00000   0.00005   0.00033
  76 8   O  1S         -0.00083  -0.00048   0.00001   0.00002  -0.00004
  77        2S          0.00260   0.00134  -0.00005   0.00001   0.00010
  78        2PX        -0.01465  -0.00742   0.00067   0.00000  -0.00014
  79        2PY        -0.00023   0.01278   0.00041  -0.00035   0.00014
  80        2PZ        -0.00731   0.01327   0.00106   0.00017   0.00023
  81        3S          0.00257   0.00292   0.00001  -0.00031   0.00026
  82        3PX        -0.01167  -0.00637   0.00046   0.00005  -0.00015
  83        3PY         0.00196   0.01064   0.00015  -0.00037   0.00018
  84        3PZ        -0.00554   0.01364   0.00094   0.00018   0.00021
  85        4XX         0.00007  -0.00037  -0.00006   0.00000  -0.00002
  86        4YY         0.00045   0.00043   0.00002   0.00003  -0.00001
  87        4ZZ         0.00005  -0.00003   0.00002   0.00002   0.00000
  88        4XY        -0.00023  -0.00045  -0.00003   0.00000  -0.00002
  89        4XZ        -0.00029   0.00066   0.00004   0.00001   0.00001
  90        4YZ        -0.00029   0.00140   0.00007   0.00002   0.00002
  91 9   H  1S          0.00108   0.00269   0.00009   0.00013  -0.00005
  92        2S         -0.00542  -0.00532   0.00029   0.00052  -0.00032
  93        3PX         0.00014   0.00071   0.00003  -0.00001   0.00001
  94        3PY        -0.00040  -0.00060   0.00002   0.00002  -0.00001
  95        3PZ         0.00012   0.00085   0.00002   0.00001   0.00001
                          76        77        78        79        80
  76 8   O  1S          2.08036
  77        2S         -0.18812   0.53765
  78        2PX        -0.04077   0.06383   0.57602
  79        2PY         0.00884  -0.01574  -0.07470   0.52528
  80        2PZ        -0.00006   0.00007  -0.00047  -0.00045   0.83786
  81        3S         -0.24606   0.57211   0.26292  -0.08288   0.00043
  82        3PX        -0.03568   0.06599   0.39201  -0.05380  -0.00052
  83        3PY         0.01183  -0.02273  -0.05708   0.30840  -0.00049
  84        3PZ        -0.00005   0.00007  -0.00048  -0.00047   0.66571
  85        4XX        -0.01018  -0.00145  -0.03698  -0.00449   0.00000
  86        4YY        -0.01075   0.00011  -0.01553   0.01184  -0.00005
  87        4ZZ        -0.00865  -0.00578  -0.00221   0.00126  -0.00005
  88        4XY        -0.00319   0.00583   0.00186  -0.02681  -0.00003
  89        4XZ        -0.00001   0.00001  -0.00003  -0.00002  -0.02063
  90        4YZ        -0.00001   0.00002  -0.00003  -0.00005   0.01538
  91 9   H  1S         -0.03379   0.08355  -0.17037   0.26321  -0.00005
  92        2S          0.01463  -0.03460  -0.05544   0.13306   0.00009
  93        3PX        -0.00629   0.01317   0.00385   0.01530  -0.00002
  94        3PY         0.00841  -0.01780   0.01105  -0.01226  -0.00001
  95        3PZ         0.00000   0.00000  -0.00002  -0.00001   0.02464
                          81        82        83        84        85
  81        3S          0.69982
  82        3PX         0.19768   0.26992
  83        3PY        -0.06535  -0.04033   0.18435
  84        3PZ         0.00032  -0.00049  -0.00045   0.53012
  85        4XX        -0.01311  -0.02433  -0.00145   0.00001   0.00312
  86        4YY        -0.00868  -0.01031   0.00696  -0.00004   0.00054
  87        4ZZ        -0.00667  -0.00177   0.00081  -0.00003   0.00015
  88        4XY         0.00761   0.00225  -0.01520  -0.00001   0.00053
  89        4XZ        -0.00001  -0.00001   0.00000  -0.01579   0.00000
  90        4YZ         0.00001  -0.00003  -0.00003   0.01275   0.00000
  91 9   H  1S         -0.00344  -0.11209   0.15056  -0.00006   0.00624
  92        2S         -0.08756  -0.03771   0.07277   0.00006  -0.00069
  93        3PX         0.01347   0.00306   0.00880  -0.00002  -0.00053
  94        3PY        -0.01405   0.00678  -0.00714  -0.00001  -0.00066
  95        3PZ         0.00001  -0.00002  -0.00001   0.01962   0.00000
                          86        87        88        89        90
  86        4YY         0.00136
  87        4ZZ         0.00015   0.00016
  88        4XY        -0.00041  -0.00011   0.00169
  89        4XZ         0.00000   0.00000   0.00000   0.00084
  90        4YZ         0.00000   0.00000   0.00000  -0.00010   0.00052
  91 9   H  1S          0.01150   0.00002  -0.01246   0.00000  -0.00001
  92        2S          0.00796   0.00096  -0.00714  -0.00001   0.00000
  93        3PX         0.00035  -0.00009  -0.00060   0.00000   0.00000
  94        3PY        -0.00050   0.00014   0.00039   0.00000   0.00000
  95        3PZ         0.00000   0.00000   0.00000  -0.00060   0.00047
                          91        92        93        94        95
  91 9   H  1S          0.19869
  92        2S          0.09179   0.07643
  93        3PX         0.00832   0.00259   0.00092
  94        3PY        -0.01176  -0.00193  -0.00073   0.00116
  95        3PZ         0.00000   0.00000   0.00000   0.00000   0.00074
    Full Mulliken population analysis:
                           1         2         3         4         5
   1 1   C  1S          2.06302
   2        2S         -0.02069   0.35694
   3        2PX         0.00000   0.00000   0.34931
   4        2PY         0.00000   0.00000   0.00000   0.39874
   5        2PZ         0.00000   0.00000   0.00000   0.00000   0.32905
   6        3S         -0.02459   0.18861   0.00000   0.00000   0.00000
   7        3PX         0.00000   0.00000   0.06337   0.00000   0.00000
   8        3PY         0.00000   0.00000   0.00000   0.01767   0.00000
   9        3PZ         0.00000   0.00000   0.00000   0.00000   0.10338
  10        4XX        -0.00071  -0.00253   0.00000   0.00000   0.00000
  11        4YY        -0.00063  -0.00126   0.00000   0.00000   0.00000
  12        4ZZ        -0.00049  -0.00741   0.00000   0.00000   0.00000
  13        4XY         0.00000   0.00000   0.00000   0.00000   0.00000
  14        4XZ         0.00000   0.00000   0.00000   0.00000   0.00000
  15        4YZ         0.00000   0.00000   0.00000   0.00000   0.00000
  16 2   C  1S          0.00000  -0.00035  -0.00075  -0.00080   0.00000
  17        2S         -0.00035   0.00933   0.01254   0.01364   0.00000
  18        2PX        -0.00124   0.02264   0.01150   0.03235   0.00000
  19        2PY        -0.00112   0.02013   0.02847   0.01287   0.00000
  20        2PZ         0.00000   0.00000   0.00000   0.00000   0.00444
  21        3S          0.00125  -0.00410   0.01424   0.02070   0.00000
  22        3PX        -0.00020   0.00807   0.00034   0.01899   0.00000
  23        3PY        -0.00101   0.01459   0.01362  -0.00035   0.00000
  24        3PZ         0.00000   0.00000   0.00000   0.00000   0.00400
  25        4XX        -0.00006   0.00097  -0.00052   0.00183   0.00000
  26        4YY        -0.00006   0.00090   0.00212  -0.00067   0.00000
  27        4ZZ         0.00000  -0.00026  -0.00026  -0.00030   0.00000
  28        4XY        -0.00017   0.00219   0.00129   0.00095   0.00000
  29        4XZ         0.00000   0.00000   0.00000   0.00000   0.00078
  30        4YZ         0.00000   0.00000   0.00000   0.00000   0.00079
  31 3   N  1S          0.00000  -0.00081  -0.00051  -0.00344   0.00000
  32        2S         -0.00066   0.01024   0.00488   0.03775   0.00000
  33        2PX        -0.00044   0.00454   0.01408   0.04151   0.00000
  34        2PY        -0.00468   0.06080   0.03437   0.06041   0.00000
  35        2PZ         0.00000   0.00000   0.00000   0.00000   0.04572
  36        3S         -0.00152  -0.00364   0.00626   0.02052   0.00000
  37        3PX        -0.00056   0.00253   0.03098   0.02579   0.00000
  38        3PY        -0.01045   0.07926   0.02358   0.01401   0.00000
  39        3PZ         0.00000   0.00000   0.00000   0.00000   0.06941
  40        4XX         0.00004  -0.00067   0.00017   0.00034   0.00000
  41        4YY        -0.00084   0.00670   0.00521   0.00398   0.00000
  42        4ZZ         0.00001  -0.00078  -0.00032  -0.00137   0.00000
  43        4XY        -0.00024   0.00123   0.00163   0.00377   0.00000
  44        4XZ         0.00000   0.00000   0.00000   0.00000   0.00085
  45        4YZ         0.00000   0.00000   0.00000   0.00000   0.00632
  46 4   O  1S          0.00000   0.00000   0.00000   0.00000   0.00000
  47        2S          0.00000  -0.00007   0.00000  -0.00007   0.00000
  48        2PX         0.00000   0.00000   0.00086   0.00060   0.00000
  49        2PY         0.00000   0.00000   0.00087   0.00050   0.00000
  50        2PZ         0.00000   0.00000   0.00000   0.00000   0.00003
  51        3S          0.00010  -0.00220  -0.00155  -0.00224   0.00000
  52        3PX         0.00004  -0.00140   0.00473   0.00445   0.00000
  53        3PY        -0.00002  -0.00066   0.00690   0.00271   0.00000
  54        3PZ         0.00000   0.00000   0.00000   0.00000   0.00049
  55        4XX         0.00000   0.00004   0.00001   0.00017   0.00000
  56        4YY         0.00000   0.00003   0.00015   0.00004   0.00000
  57        4ZZ         0.00000   0.00000   0.00001   0.00001   0.00000
  58        4XY         0.00000   0.00007   0.00016   0.00012   0.00000
  59        4XZ         0.00000   0.00000   0.00000   0.00000   0.00002
  60        4YZ         0.00000   0.00000   0.00000   0.00000   0.00001
  61 5   H  1S          0.00000  -0.00019  -0.00015  -0.00034   0.00004
  62        2S          0.00017  -0.00265  -0.00081  -0.00368  -0.00106
  63        3PX         0.00000   0.00001   0.00001   0.00004   0.00001
  64        3PY         0.00000   0.00002   0.00002   0.00005   0.00002
  65        3PZ         0.00000   0.00000   0.00000   0.00000   0.00000
  66 6   H  1S          0.00000  -0.00024  -0.00028  -0.00010   0.00000
  67        2S          0.00025  -0.00431  -0.00405  -0.00045   0.00000
  68        3PX         0.00000   0.00001   0.00009   0.00001   0.00000
  69        3PY         0.00000   0.00001   0.00003   0.00000   0.00000
  70        3PZ         0.00000   0.00000   0.00000   0.00000   0.00000
  71 7   H  1S          0.00000  -0.00019  -0.00015  -0.00034   0.00003
  72        2S          0.00017  -0.00265  -0.00071  -0.00394  -0.00100
  73        3PX         0.00000   0.00001   0.00001   0.00004   0.00000
  74        3PY         0.00000   0.00002   0.00002   0.00005   0.00002
  75        3PZ         0.00000   0.00000   0.00000   0.00000   0.00000
  76 8   O  1S          0.00000   0.00000   0.00000   0.00000   0.00000
  77        2S          0.00000   0.00000   0.00000   0.00000   0.00000
  78        2PX         0.00000   0.00000  -0.00005   0.00000   0.00000
  79        2PY         0.00000   0.00000  -0.00001   0.00000   0.00000
  80        2PZ         0.00000   0.00000   0.00000   0.00000   0.00000
  81        3S          0.00000   0.00016   0.00028  -0.00004   0.00000
  82        3PX         0.00000  -0.00023  -0.00237  -0.00025   0.00000
  83        3PY         0.00000  -0.00004  -0.00034   0.00017   0.00000
  84        3PZ         0.00000   0.00000   0.00000   0.00000  -0.00013
  85        4XX         0.00000   0.00000  -0.00001   0.00000   0.00000
  86        4YY         0.00000   0.00000   0.00000   0.00000   0.00000
  87        4ZZ         0.00000   0.00000   0.00000   0.00000   0.00000
  88        4XY         0.00000   0.00000   0.00000   0.00000   0.00000
  89        4XZ         0.00000   0.00000   0.00000   0.00000   0.00000
  90        4YZ         0.00000   0.00000   0.00000   0.00000   0.00000
  91 9   H  1S          0.00000  -0.00005  -0.00021   0.00001   0.00000
  92        2S          0.00014  -0.00176  -0.00082  -0.00055   0.00000
  93        3PX         0.00000   0.00001   0.00008  -0.00001   0.00000
  94        3PY         0.00000   0.00000  -0.00001   0.00000   0.00000
  95        3PZ         0.00000   0.00000   0.00000   0.00000   0.00000
                           6         7         8         9        10
   6        3S          0.20784
   7        3PX         0.00000   0.06441
   8        3PY         0.00000   0.00000   0.05320
   9        3PZ         0.00000   0.00000   0.00000   0.10947
  10        4XX        -0.00104   0.00000   0.00000   0.00000   0.00143
  11        4YY        -0.00156   0.00000   0.00000   0.00000  -0.00028
  12        4ZZ        -0.00338   0.00000   0.00000   0.00000   0.00010
  13        4XY         0.00000   0.00000   0.00000   0.00000   0.00000
  14        4XZ         0.00000   0.00000   0.00000   0.00000   0.00000
  15        4YZ         0.00000   0.00000   0.00000   0.00000   0.00000
  16 2   C  1S          0.00059   0.00043   0.00041   0.00000  -0.00007
  17        2S          0.00117   0.00154   0.00032   0.00000   0.00107
  18        2PX         0.02214   0.00018   0.00421   0.00000  -0.00070
  19        2PY         0.02038   0.00549  -0.00010   0.00000   0.00267
  20        2PZ         0.00000   0.00000   0.00000  -0.00018   0.00000
  21        3S         -0.02455  -0.00349  -0.00577   0.00000   0.00248
  22        3PX         0.01522  -0.00221  -0.00192   0.00000  -0.00072
  23        3PY         0.01688   0.00261  -0.00147   0.00000   0.00242
  24        3PZ         0.00000   0.00000   0.00000  -0.00629   0.00000
  25        4XX         0.00187  -0.00098   0.00127   0.00000   0.00006
  26        4YY         0.00072   0.00196  -0.00047   0.00000  -0.00011
  27        4ZZ        -0.00103   0.00003  -0.00020   0.00000  -0.00002
  28        4XY         0.00088   0.00003   0.00000   0.00000  -0.00004
  29        4XZ         0.00000   0.00000   0.00000   0.00048   0.00000
  30        4YZ         0.00000   0.00000   0.00000   0.00061   0.00000
  31 3   N  1S          0.00175   0.00048   0.00138   0.00000   0.00003
  32        2S         -0.01844  -0.00326  -0.00445   0.00000  -0.00068
  33        2PX         0.00341   0.01982   0.01005   0.00000   0.00047
  34        2PY         0.02043  -0.00001  -0.00491   0.00000  -0.00088
  35        2PZ         0.00000   0.00000   0.00000   0.04117   0.00000
  36        3S         -0.06856  -0.00046  -0.00747   0.00000  -0.00042
  37        3PX         0.00597   0.03574   0.01350   0.00000  -0.00120
  38        3PY         0.03315   0.00052   0.00740   0.00000  -0.00051
  39        3PZ         0.00000   0.00000   0.00000   0.07645   0.00000
  40        4XX        -0.00033  -0.00051   0.00251   0.00000  -0.00002
  41        4YY         0.00414   0.00067  -0.00332   0.00000  -0.00005
  42        4ZZ        -0.00050   0.00008   0.00066   0.00000   0.00001
  43        4XY         0.00024   0.00109   0.00006   0.00000   0.00005
  44        4XZ         0.00000   0.00000   0.00000   0.00029   0.00000
  45        4YZ         0.00000   0.00000   0.00000   0.00224   0.00000
  46 4   O  1S          0.00010   0.00014   0.00010   0.00000   0.00000
  47        2S         -0.00145  -0.00181  -0.00133   0.00000   0.00000
  48        2PX         0.00328   0.00390   0.00003   0.00000  -0.00004
  49        2PY         0.00375   0.00686  -0.00028   0.00000  -0.00002
  50        2PZ         0.00000   0.00000   0.00000   0.00293   0.00000
  51        3S         -0.00949  -0.00914  -0.00626   0.00000  -0.00014
  52        3PX         0.01224   0.00795  -0.00188   0.00000  -0.00037
  53        3PY         0.01512   0.02016  -0.00087   0.00000  -0.00033
  54        3PZ         0.00000   0.00000   0.00000   0.01296   0.00000
  55        4XX         0.00024   0.00017   0.00029   0.00000   0.00000
  56        4YY         0.00040   0.00064   0.00002   0.00000   0.00000
  57        4ZZ         0.00009   0.00022   0.00003   0.00000   0.00000
  58        4XY         0.00012   0.00014   0.00010   0.00000   0.00000
  59        4XZ         0.00000   0.00000   0.00000   0.00003   0.00000
  60        4YZ         0.00000   0.00000   0.00000   0.00008   0.00000
  61 5   H  1S         -0.00330  -0.00013  -0.00154  -0.00125  -0.00002
  62        2S         -0.00810   0.00098  -0.00371  -0.00326  -0.00035
  63        3PX         0.00010   0.00000   0.00004   0.00003   0.00000
  64        3PY         0.00007   0.00000   0.00002   0.00004   0.00000
  65        3PZ        -0.00005  -0.00001  -0.00002   0.00000   0.00000
  66 6   H  1S         -0.00290  -0.00475   0.00001   0.00000   0.00017
  67        2S         -0.00550  -0.01297   0.00002   0.00000   0.00080
  68        3PX         0.00001   0.00011  -0.00002   0.00000   0.00001
  69        3PY         0.00006   0.00007   0.00000   0.00000   0.00000
  70        3PZ         0.00000   0.00000   0.00000   0.00000   0.00000
  71 7   H  1S         -0.00332  -0.00003  -0.00160  -0.00115  -0.00002
  72        2S         -0.00837   0.00128  -0.00380  -0.00292  -0.00038
  73        3PX         0.00010   0.00000   0.00004   0.00003   0.00000
  74        3PY         0.00007   0.00000   0.00003   0.00004   0.00000
  75        3PZ        -0.00005  -0.00001  -0.00002   0.00000   0.00000
  76 8   O  1S         -0.00001   0.00003  -0.00001   0.00000   0.00000
  77        2S          0.00012  -0.00062   0.00010   0.00000   0.00000
  78        2PX        -0.00030  -0.00173  -0.00042   0.00000   0.00000
  79        2PY        -0.00005  -0.00034   0.00019   0.00000   0.00000
  80        2PZ         0.00000   0.00000   0.00000  -0.00022   0.00000
  81        3S          0.00256   0.00070   0.00072   0.00000  -0.00007
  82        3PX        -0.00149  -0.00705  -0.00175   0.00000   0.00011
  83        3PY        -0.00021  -0.00152   0.00130   0.00000  -0.00001
  84        3PZ         0.00000   0.00000   0.00000  -0.00159   0.00000
  85        4XX         0.00003   0.00010  -0.00006   0.00000   0.00000
  86        4YY        -0.00009  -0.00027  -0.00001   0.00000   0.00000
  87        4ZZ        -0.00002  -0.00002  -0.00001   0.00000   0.00000
  88        4XY         0.00000  -0.00001   0.00001   0.00000   0.00000
  89        4XZ         0.00000   0.00000   0.00000   0.00003   0.00000
  90        4YZ         0.00000   0.00000   0.00000  -0.00001   0.00000
  91 9   H  1S         -0.00151  -0.00366   0.00028   0.00000   0.00004
  92        2S         -0.00914  -0.00359  -0.00017   0.00000   0.00056
  93        3PX         0.00005   0.00037  -0.00005   0.00000   0.00000
  94        3PY         0.00000  -0.00005  -0.00003   0.00000   0.00000
  95        3PZ         0.00000   0.00000   0.00000   0.00001   0.00000
                          11        12        13        14        15
  11        4YY         0.00180
  12        4ZZ        -0.00006   0.00045
  13        4XY         0.00000   0.00000   0.00275
  14        4XZ         0.00000   0.00000   0.00000   0.00038
  15        4YZ         0.00000   0.00000   0.00000   0.00000   0.00186
  16 2   C  1S         -0.00005   0.00000  -0.00016   0.00000   0.00000
  17        2S          0.00066  -0.00013   0.00202   0.00000   0.00000
  18        2PX         0.00197  -0.00011   0.00144   0.00000   0.00000
  19        2PY        -0.00090  -0.00019   0.00102   0.00000   0.00000
  20        2PZ         0.00000   0.00000   0.00000   0.00093   0.00113
  21        3S          0.00112   0.00004   0.00100   0.00000   0.00000
  22        3PX         0.00219   0.00010   0.00001   0.00000   0.00000
  23        3PY        -0.00109  -0.00017   0.00001   0.00000   0.00000
  24        3PZ         0.00000   0.00000   0.00000   0.00060   0.00061
  25        4XX        -0.00016  -0.00001   0.00006   0.00000   0.00000
  26        4YY         0.00003  -0.00001  -0.00005   0.00000   0.00000
  27        4ZZ         0.00002   0.00000   0.00000   0.00000   0.00000
  28        4XY         0.00004  -0.00002   0.00009   0.00000   0.00000
  29        4XZ         0.00000   0.00000   0.00000   0.00000  -0.00004
  30        4YZ         0.00000   0.00000   0.00000  -0.00007  -0.00010
  31 3   N  1S         -0.00072   0.00001  -0.00027   0.00000   0.00000
  32        2S          0.00578  -0.00059   0.00154   0.00000   0.00000
  33        2PX         0.00308  -0.00020   0.00262   0.00000   0.00000
  34        2PY        -0.00527  -0.00069   0.00166   0.00000   0.00000
  35        2PZ         0.00000   0.00000   0.00000   0.00061   0.00549
  36        3S          0.00781  -0.00161   0.00115   0.00000   0.00000
  37        3PX         0.00224  -0.00040   0.00319   0.00000   0.00000
  38        3PY        -0.00488  -0.00122   0.00025   0.00000   0.00000
  39        3PZ         0.00000   0.00000   0.00000   0.00039   0.00360
  40        4XX         0.00014   0.00001   0.00004   0.00000   0.00000
  41        4YY        -0.00057  -0.00007   0.00014   0.00000   0.00000
  42        4ZZ         0.00000   0.00003  -0.00001   0.00000   0.00000
  43        4XY         0.00014  -0.00004   0.00020   0.00000   0.00000
  44        4XZ         0.00000   0.00000   0.00000  -0.00001   0.00010
  45        4YZ         0.00000   0.00000   0.00000   0.00008   0.00056
  46 4   O  1S          0.00000   0.00000   0.00000   0.00000   0.00000
  47        2S          0.00001   0.00000   0.00004   0.00000   0.00000
  48        2PX         0.00004   0.00000   0.00018   0.00000   0.00000
  49        2PY         0.00001   0.00000   0.00013   0.00000   0.00000
  50        2PZ         0.00000   0.00000   0.00000   0.00001   0.00001
  51        3S          0.00018   0.00001   0.00048   0.00000   0.00000
  52        3PX         0.00053  -0.00006   0.00109   0.00000   0.00000
  53        3PY         0.00022  -0.00008   0.00085   0.00000   0.00000
  54        3PZ         0.00000   0.00000   0.00000   0.00018   0.00025
  55        4XX         0.00000   0.00000  -0.00002   0.00000   0.00000
  56        4YY         0.00000   0.00000   0.00001   0.00000   0.00000
  57        4ZZ         0.00000   0.00000   0.00000   0.00000   0.00000
  58        4XY         0.00000   0.00000  -0.00001   0.00000   0.00000
  59        4XZ         0.00000   0.00000   0.00000   0.00000   0.00000
  60        4YZ         0.00000   0.00000   0.00000   0.00000   0.00000
  61 5   H  1S          0.00007   0.00000   0.00001   0.00003   0.00008
  62        2S          0.00041   0.00003  -0.00007   0.00009   0.00031
  63        3PX         0.00000   0.00000   0.00000   0.00000   0.00000
  64        3PY         0.00000   0.00000   0.00000   0.00000   0.00000
  65        3PZ         0.00000   0.00000   0.00000   0.00000   0.00000
  66 6   H  1S         -0.00002   0.00000   0.00001   0.00000   0.00000
  67        2S         -0.00041   0.00000  -0.00009   0.00000   0.00000
  68        3PX         0.00000   0.00000   0.00000   0.00000   0.00000
  69        3PY         0.00000   0.00000   0.00000   0.00000   0.00000
  70        3PZ         0.00000   0.00000   0.00000   0.00000   0.00000
  71 7   H  1S          0.00007   0.00000   0.00001   0.00003   0.00008
  72        2S          0.00046   0.00002  -0.00007   0.00008   0.00030
  73        3PX         0.00000   0.00000   0.00000   0.00000   0.00000
  74        3PY         0.00000   0.00000   0.00000   0.00000   0.00000
  75        3PZ         0.00000   0.00000   0.00000   0.00000   0.00000
  76 8   O  1S          0.00000   0.00000   0.00000   0.00000   0.00000
  77        2S          0.00000   0.00000   0.00000   0.00000   0.00000
  78        2PX         0.00000   0.00000   0.00000   0.00000   0.00000
  79        2PY         0.00000   0.00000   0.00000   0.00000   0.00000
  80        2PZ         0.00000   0.00000   0.00000   0.00000   0.00000
  81        3S          0.00001   0.00000   0.00002   0.00000   0.00000
  82        3PX        -0.00001  -0.00001   0.00000   0.00000   0.00000
  83        3PY         0.00000   0.00000  -0.00003   0.00000   0.00000
  84        3PZ         0.00000   0.00000   0.00000   0.00000   0.00000
  85        4XX         0.00000   0.00000   0.00000   0.00000   0.00000
  86        4YY         0.00000   0.00000   0.00000   0.00000   0.00000
  87        4ZZ         0.00000   0.00000   0.00000   0.00000   0.00000
  88        4XY         0.00000   0.00000   0.00000   0.00000   0.00000
  89        4XZ         0.00000   0.00000   0.00000   0.00000   0.00000
  90        4YZ         0.00000   0.00000   0.00000   0.00000   0.00000
  91 9   H  1S          0.00000   0.00000   0.00001   0.00000   0.00000
  92        2S         -0.00010   0.00005   0.00011   0.00000   0.00000
  93        3PX         0.00000   0.00000   0.00000   0.00000   0.00000
  94        3PY         0.00000   0.00000   0.00000   0.00000   0.00000
  95        3PZ         0.00000   0.00000   0.00000   0.00000   0.00000
                          16        17        18        19        20
  16 2   C  1S          2.05579
  17        2S         -0.01525   0.29139
  18        2PX         0.00000   0.00000   0.37758
  19        2PY         0.00000   0.00000   0.00000   0.38267
  20        2PZ         0.00000   0.00000   0.00000   0.00000   0.39787
  21        3S         -0.03550   0.23273   0.00000   0.00000   0.00000
  22        3PX         0.00000   0.00000   0.09463   0.00000   0.00000
  23        3PY         0.00000   0.00000   0.00000   0.10159   0.00000
  24        3PZ         0.00000   0.00000   0.00000   0.00000   0.11680
  25        4XX        -0.00063  -0.00076   0.00000   0.00000   0.00000
  26        4YY        -0.00069   0.00021   0.00000   0.00000   0.00000
  27        4ZZ        -0.00068   0.00024   0.00000   0.00000   0.00000
  28        4XY         0.00000   0.00000   0.00000   0.00000   0.00000
  29        4XZ         0.00000   0.00000   0.00000   0.00000   0.00000
  30        4YZ         0.00000   0.00000   0.00000   0.00000   0.00000
  31 3   N  1S          0.00000   0.00000   0.00000   0.00000   0.00000
  32        2S          0.00000  -0.00001  -0.00001  -0.00004   0.00000
  33        2PX         0.00000  -0.00003  -0.00001  -0.00010   0.00000
  34        2PY         0.00000  -0.00004  -0.00012  -0.00012   0.00000
  35        2PZ         0.00000   0.00000   0.00000   0.00000  -0.00001
  36        3S          0.00000   0.00015  -0.00023  -0.00083   0.00000
  37        3PX         0.00004  -0.00111  -0.00025  -0.00255   0.00000
  38        3PY         0.00004  -0.00079  -0.00221  -0.00199   0.00000
  39        3PZ         0.00000   0.00000   0.00000   0.00000  -0.00061
  40        4XX         0.00000   0.00000   0.00000   0.00001   0.00000
  41        4YY         0.00000  -0.00001  -0.00002  -0.00002   0.00000
  42        4ZZ         0.00000   0.00000   0.00000   0.00000   0.00000
  43        4XY         0.00000   0.00000   0.00000   0.00000   0.00000
  44        4XZ         0.00000   0.00000   0.00000   0.00000   0.00000
  45        4YZ         0.00000   0.00000   0.00000   0.00000   0.00000
  46 4   O  1S          0.00000   0.00000   0.00000   0.00000   0.00000
  47        2S          0.00000   0.00000  -0.00002   0.00000   0.00000
  48        2PX         0.00000  -0.00002  -0.00006   0.00001   0.00000
  49        2PY         0.00000   0.00000  -0.00001   0.00000   0.00000
  50        2PZ         0.00000   0.00000   0.00000   0.00000   0.00000
  51        3S          0.00001  -0.00031  -0.00097  -0.00001   0.00000
  52        3PX         0.00003  -0.00135  -0.00266   0.00020   0.00000
  53        3PY         0.00000  -0.00015  -0.00042  -0.00016   0.00000
  54        3PZ         0.00000   0.00000   0.00000   0.00000  -0.00020
  55        4XX         0.00000   0.00001   0.00003   0.00000   0.00000
  56        4YY         0.00000   0.00000   0.00000   0.00000   0.00000
  57        4ZZ         0.00000   0.00000   0.00000   0.00000   0.00000
  58        4XY         0.00000   0.00000   0.00000   0.00000   0.00000
  59        4XZ         0.00000   0.00000   0.00000   0.00000   0.00000
  60        4YZ         0.00000   0.00000   0.00000   0.00000   0.00000
  61 5   H  1S         -0.00178   0.02799   0.00060   0.03129   0.06597
  62        2S         -0.00064   0.01179   0.00037   0.01611   0.03437
  63        3PX         0.00000   0.00002   0.00137   0.00000   0.00003
  64        3PY        -0.00007   0.00077   0.00001  -0.00006   0.00193
  65        3PZ        -0.00016   0.00165   0.00003   0.00189   0.00020
  66 6   H  1S         -0.00176   0.02691   0.07976   0.01791   0.00006
  67        2S         -0.00048   0.00820   0.04422   0.00973   0.00003
  68        3PX        -0.00019   0.00200   0.00120   0.00116   0.00000
  69        3PY        -0.00005   0.00046   0.00107   0.00039   0.00000
  70        3PZ         0.00000   0.00000   0.00000   0.00000   0.00149
  71 7   H  1S         -0.00179   0.02806   0.00112   0.03508   0.06175
  72        2S         -0.00064   0.01192   0.00066   0.01811   0.03214
  73        3PX         0.00000   0.00003   0.00132   0.00001   0.00005
  74        3PY        -0.00008   0.00086   0.00002  -0.00012   0.00201
  75        3PZ        -0.00015   0.00154   0.00005   0.00197   0.00005
  76 8   O  1S          0.00000   0.00000   0.00000   0.00000   0.00000
  77        2S          0.00000   0.00000   0.00000   0.00000   0.00000
  78        2PX         0.00000   0.00000   0.00000   0.00000   0.00000
  79        2PY         0.00000   0.00000   0.00000   0.00000   0.00000
  80        2PZ         0.00000   0.00000   0.00000   0.00000   0.00000
  81        3S          0.00000   0.00000   0.00000   0.00000   0.00000
  82        3PX         0.00000   0.00001   0.00002   0.00000   0.00000
  83        3PY         0.00000   0.00000   0.00000   0.00000   0.00000
  84        3PZ         0.00000   0.00000   0.00000   0.00000   0.00000
  85        4XX         0.00000   0.00000   0.00000   0.00000   0.00000
  86        4YY         0.00000   0.00000   0.00000   0.00000   0.00000
  87        4ZZ         0.00000   0.00000   0.00000   0.00000   0.00000
  88        4XY         0.00000   0.00000   0.00000   0.00000   0.00000
  89        4XZ         0.00000   0.00000   0.00000   0.00000   0.00000
  90        4YZ         0.00000   0.00000   0.00000   0.00000   0.00000
  91 9   H  1S          0.00000   0.00000   0.00000   0.00000   0.00000
  92        2S          0.00000   0.00005   0.00006   0.00006   0.00000
  93        3PX         0.00000   0.00000   0.00000   0.00000   0.00000
  94        3PY         0.00000   0.00000   0.00000   0.00000   0.00000
  95        3PZ         0.00000   0.00000   0.00000   0.00000   0.00000
                          21        22        23        24        25
  21        3S          0.31396
  22        3PX         0.00000   0.08236
  23        3PY         0.00000   0.00000   0.08574
  24        3PZ         0.00000   0.00000   0.00000   0.11220
  25        4XX        -0.00075   0.00000   0.00000   0.00000   0.00095
  26        4YY        -0.00060   0.00000   0.00000   0.00000  -0.00009
  27        4ZZ         0.00077   0.00000   0.00000   0.00000  -0.00017
  28        4XY         0.00000   0.00000   0.00000   0.00000   0.00000
  29        4XZ         0.00000   0.00000   0.00000   0.00000   0.00000
  30        4YZ         0.00000   0.00000   0.00000   0.00000   0.00000
  31 3   N  1S          0.00002   0.00002   0.00006   0.00000   0.00000
  32        2S         -0.00015   0.00002  -0.00094   0.00000   0.00000
  33        2PX        -0.00148   0.00006  -0.00229   0.00000   0.00000
  34        2PY        -0.00270  -0.00406  -0.00181   0.00000   0.00000
  35        2PZ         0.00000   0.00000   0.00000  -0.00037   0.00000
  36        3S          0.00369   0.00155  -0.00118   0.00000  -0.00004
  37        3PX        -0.00676   0.00020  -0.00818   0.00000  -0.00014
  38        3PY        -0.01010  -0.01268  -0.00399   0.00000   0.00004
  39        3PZ         0.00000   0.00000   0.00000  -0.00183   0.00000
  40        4XX         0.00005   0.00008   0.00008   0.00000   0.00000
  41        4YY        -0.00042  -0.00054  -0.00021   0.00000   0.00000
  42        4ZZ         0.00006   0.00008   0.00005   0.00000   0.00000
  43        4XY        -0.00013  -0.00002  -0.00007   0.00000   0.00000
  44        4XZ         0.00000   0.00000   0.00000   0.00000   0.00000
  45        4YZ         0.00000   0.00000   0.00000  -0.00001   0.00000
  46 4   O  1S          0.00002  -0.00001   0.00000   0.00000   0.00000
  47        2S         -0.00045  -0.00001   0.00001   0.00000   0.00000
  48        2PX        -0.00118   0.00041   0.00024   0.00000   0.00001
  49        2PY        -0.00006  -0.00013  -0.00015   0.00000   0.00000
  50        2PZ         0.00000   0.00000   0.00000  -0.00080   0.00000
  51        3S         -0.00319   0.00016   0.00004   0.00000   0.00005
  52        3PX        -0.00682   0.00094   0.00098   0.00000   0.00047
  53        3PY        -0.00050  -0.00056  -0.00114   0.00000   0.00006
  54        3PZ         0.00000   0.00000   0.00000  -0.00523   0.00000
  55        4XX         0.00014   0.00013   0.00000   0.00000   0.00000
  56        4YY         0.00000  -0.00007   0.00000   0.00000   0.00000
  57        4ZZ         0.00002   0.00000   0.00000   0.00000   0.00000
  58        4XY        -0.00001   0.00001   0.00001   0.00000   0.00000
  59        4XZ         0.00000   0.00000   0.00000   0.00003   0.00000
  60        4YZ         0.00000   0.00000   0.00000   0.00000   0.00000
  61 5   H  1S          0.03882   0.00047   0.02056   0.04766  -0.00070
  62        2S          0.01606   0.00051   0.01706   0.03643  -0.00159
  63        3PX         0.00002   0.00084   0.00000   0.00001   0.00000
  64        3PY         0.00047   0.00000   0.00024   0.00047   0.00001
  65        3PZ         0.00098   0.00001   0.00044  -0.00002  -0.00003
  66 6   H  1S          0.04083   0.05149   0.01362   0.00004   0.00276
  67        2S          0.01680   0.04162   0.01124   0.00003   0.00283
  68        3PX         0.00121   0.00001   0.00028   0.00000   0.00005
  69        3PY         0.00030   0.00022   0.00044   0.00000  -0.00003
  70        3PZ         0.00000   0.00000   0.00000   0.00103   0.00000
  71 7   H  1S          0.03869   0.00084   0.02317   0.04457  -0.00070
  72        2S          0.01518   0.00081   0.01898   0.03365  -0.00159
  73        3PX         0.00003   0.00082   0.00000   0.00002   0.00000
  74        3PY         0.00052   0.00000   0.00019   0.00049   0.00001
  75        3PZ         0.00091   0.00002   0.00046   0.00000  -0.00003
  76 8   O  1S          0.00000   0.00000   0.00000   0.00000   0.00000
  77        2S         -0.00001   0.00000   0.00000   0.00000   0.00000
  78        2PX         0.00002  -0.00001   0.00000   0.00000   0.00000
  79        2PY         0.00000   0.00000   0.00000   0.00000   0.00000
  80        2PZ         0.00000   0.00000   0.00000   0.00000   0.00000
  81        3S         -0.00023  -0.00004  -0.00007   0.00000   0.00000
  82        3PX         0.00039  -0.00012   0.00003   0.00000   0.00000
  83        3PY         0.00004  -0.00003  -0.00002   0.00000   0.00000
  84        3PZ         0.00000   0.00000   0.00000   0.00008   0.00000
  85        4XX         0.00000   0.00000   0.00000   0.00000   0.00000
  86        4YY         0.00000   0.00000   0.00000   0.00000   0.00000
  87        4ZZ         0.00000   0.00000   0.00000   0.00000   0.00000
  88        4XY         0.00000   0.00000   0.00000   0.00000   0.00000
  89        4XZ         0.00000   0.00000   0.00000   0.00000   0.00000
  90        4YZ         0.00000   0.00000   0.00000   0.00000   0.00000
  91 9   H  1S          0.00002   0.00002   0.00002   0.00000   0.00000
  92        2S          0.00069   0.00038   0.00055   0.00000   0.00000
  93        3PX         0.00000  -0.00001   0.00000   0.00000   0.00000
  94        3PY         0.00000   0.00000   0.00000   0.00000   0.00000
  95        3PZ         0.00000   0.00000   0.00000   0.00000   0.00000
                          26        27        28        29        30
  26        4YY         0.00057
  27        4ZZ         0.00000   0.00050
  28        4XY         0.00000   0.00000   0.00090
  29        4XZ         0.00000   0.00000   0.00000   0.00024
  30        4YZ         0.00000   0.00000   0.00000   0.00000   0.00075
  31 3   N  1S          0.00000   0.00000   0.00000   0.00000   0.00000
  32        2S          0.00000   0.00000   0.00000   0.00000   0.00000
  33        2PX         0.00001   0.00000   0.00000   0.00000   0.00000
  34        2PY         0.00000   0.00000   0.00000   0.00000   0.00000
  35        2PZ         0.00000   0.00000   0.00000   0.00000   0.00000
  36        3S         -0.00005   0.00002  -0.00007   0.00000   0.00000
  37        3PX         0.00044   0.00001   0.00004   0.00000   0.00000
  38        3PY         0.00006   0.00005   0.00002   0.00000   0.00000
  39        3PZ         0.00000   0.00000   0.00000   0.00005   0.00014
  40        4XX         0.00000   0.00000   0.00000   0.00000   0.00000
  41        4YY         0.00000   0.00000   0.00000   0.00000   0.00000
  42        4ZZ         0.00000   0.00000   0.00000   0.00000   0.00000
  43        4XY         0.00000   0.00000   0.00000   0.00000   0.00000
  44        4XZ         0.00000   0.00000   0.00000   0.00000   0.00000
  45        4YZ         0.00000   0.00000   0.00000   0.00000   0.00000
  46 4   O  1S          0.00000   0.00000   0.00000   0.00000   0.00000
  47        2S          0.00000   0.00000   0.00000   0.00000   0.00000
  48        2PX         0.00000   0.00000   0.00000   0.00000   0.00000
  49        2PY         0.00000   0.00000   0.00000   0.00000   0.00000
  50        2PZ         0.00000   0.00000   0.00000   0.00000   0.00000
  51        3S          0.00000  -0.00001   0.00001   0.00000   0.00000
  52        3PX        -0.00007  -0.00005   0.00004   0.00000   0.00000
  53        3PY         0.00000   0.00000  -0.00001   0.00000   0.00000
  54        3PZ         0.00000   0.00000   0.00000   0.00003   0.00000
  55        4XX         0.00000   0.00000   0.00000   0.00000   0.00000
  56        4YY         0.00000   0.00000   0.00000   0.00000   0.00000
  57        4ZZ         0.00000   0.00000   0.00000   0.00000   0.00000
  58        4XY         0.00000   0.00000   0.00000   0.00000   0.00000
  59        4XZ         0.00000   0.00000   0.00000   0.00000   0.00000
  60        4YZ         0.00000   0.00000   0.00000   0.00000   0.00000
  61 5   H  1S         -0.00010   0.00198   0.00003   0.00006   0.00210
  62        2S          0.00004   0.00163   0.00000   0.00001   0.00041
  63        3PX         0.00000   0.00000  -0.00006   0.00000   0.00000
  64        3PY         0.00000  -0.00004   0.00000   0.00000   0.00002
  65        3PZ        -0.00001   0.00005   0.00000   0.00000   0.00000
  66 6   H  1S         -0.00042  -0.00061   0.00177   0.00000   0.00000
  67        2S         -0.00105  -0.00161   0.00035   0.00000   0.00000
  68        3PX         0.00002  -0.00002   0.00001   0.00000   0.00000
  69        3PY         0.00001   0.00001  -0.00003   0.00000   0.00000
  70        3PZ         0.00000   0.00000   0.00000  -0.00003  -0.00004
  71 7   H  1S          0.00003   0.00167   0.00006   0.00010   0.00221
  72        2S          0.00024   0.00143   0.00001   0.00001   0.00043
  73        3PX         0.00000   0.00000  -0.00006   0.00001   0.00000
  74        3PY         0.00000  -0.00004   0.00000   0.00001   0.00002
  75        3PZ        -0.00001   0.00004   0.00000   0.00000   0.00000
  76 8   O  1S          0.00000   0.00000   0.00000   0.00000   0.00000
  77        2S          0.00000   0.00000   0.00000   0.00000   0.00000
  78        2PX         0.00000   0.00000   0.00000   0.00000   0.00000
  79        2PY         0.00000   0.00000   0.00000   0.00000   0.00000
  80        2PZ         0.00000   0.00000   0.00000   0.00000   0.00000
  81        3S          0.00000   0.00000   0.00000   0.00000   0.00000
  82        3PX         0.00000   0.00000   0.00000   0.00000   0.00000
  83        3PY         0.00000   0.00000   0.00000   0.00000   0.00000
  84        3PZ         0.00000   0.00000   0.00000   0.00000   0.00000
  85        4XX         0.00000   0.00000   0.00000   0.00000   0.00000
  86        4YY         0.00000   0.00000   0.00000   0.00000   0.00000
  87        4ZZ         0.00000   0.00000   0.00000   0.00000   0.00000
  88        4XY         0.00000   0.00000   0.00000   0.00000   0.00000
  89        4XZ         0.00000   0.00000   0.00000   0.00000   0.00000
  90        4YZ         0.00000   0.00000   0.00000   0.00000   0.00000
  91 9   H  1S          0.00000   0.00000   0.00000   0.00000   0.00000
  92        2S          0.00000   0.00000   0.00000   0.00000   0.00000
  93        3PX         0.00000   0.00000   0.00000   0.00000   0.00000
  94        3PY         0.00000   0.00000   0.00000   0.00000   0.00000
  95        3PZ         0.00000   0.00000   0.00000   0.00000   0.00000
                          31        32        33        34        35
  31 3   N  1S          2.07705
  32        2S         -0.03220   0.42881
  33        2PX         0.00000   0.00000   0.51037
  34        2PY         0.00000   0.00000   0.00000   0.51122
  35        2PZ         0.00000   0.00000   0.00000   0.00000   0.41191
  36        3S         -0.04694   0.42039   0.00000   0.00000   0.00000
  37        3PX         0.00000   0.00000   0.17728   0.00000   0.00000
  38        3PY         0.00000   0.00000   0.00000   0.17935   0.00000
  39        3PZ         0.00000   0.00000   0.00000   0.00000   0.14528
  40        4XX        -0.00035  -0.00359   0.00000   0.00000   0.00000
  41        4YY        -0.00015  -0.00762   0.00000   0.00000   0.00000
  42        4ZZ        -0.00034  -0.00438   0.00000   0.00000   0.00000
  43        4XY         0.00000   0.00000   0.00000   0.00000   0.00000
  44        4XZ         0.00000   0.00000   0.00000   0.00000   0.00000
  45        4YZ         0.00000   0.00000   0.00000   0.00000   0.00000
  46 4   O  1S          0.00000   0.00000   0.00000   0.00000   0.00000
  47        2S          0.00000   0.00000   0.00000   0.00000   0.00000
  48        2PX         0.00000   0.00000   0.00000   0.00000   0.00000
  49        2PY         0.00000   0.00000   0.00000  -0.00001   0.00000
  50        2PZ         0.00000   0.00000   0.00000   0.00000   0.00000
  51        3S          0.00000   0.00001  -0.00018  -0.00020   0.00000
  52        3PX         0.00000  -0.00003  -0.00017  -0.00072   0.00000
  53        3PY         0.00000  -0.00008  -0.00087  -0.00145   0.00000
  54        3PZ         0.00000   0.00000   0.00000   0.00000  -0.00013
  55        4XX         0.00000   0.00000   0.00000   0.00000   0.00000
  56        4YY         0.00000   0.00000   0.00000   0.00000   0.00000
  57        4ZZ         0.00000   0.00000   0.00000   0.00000   0.00000
  58        4XY         0.00000   0.00000   0.00000   0.00000   0.00000
  59        4XZ         0.00000   0.00000   0.00000   0.00000   0.00000
  60        4YZ         0.00000   0.00000   0.00000   0.00000   0.00000
  61 5   H  1S          0.00000   0.00000   0.00000   0.00000   0.00000
  62        2S          0.00000   0.00002   0.00012   0.00008  -0.00014
  63        3PX         0.00000   0.00000   0.00000   0.00000   0.00000
  64        3PY         0.00000   0.00000   0.00000   0.00000   0.00000
  65        3PZ         0.00000   0.00000   0.00000   0.00000   0.00000
  66 6   H  1S          0.00000   0.00000   0.00000   0.00000   0.00000
  67        2S          0.00000   0.00003  -0.00023  -0.00007   0.00000
  68        3PX         0.00000   0.00000   0.00000   0.00000   0.00000
  69        3PY         0.00000   0.00000   0.00000   0.00000   0.00000
  70        3PZ         0.00000   0.00000   0.00000   0.00000   0.00000
  71 7   H  1S          0.00000   0.00000   0.00000   0.00000   0.00000
  72        2S          0.00000   0.00002   0.00012   0.00008  -0.00013
  73        3PX         0.00000   0.00000   0.00000   0.00000   0.00000
  74        3PY         0.00000   0.00000   0.00000   0.00000   0.00000
  75        3PZ         0.00000   0.00000   0.00000   0.00000   0.00000
  76 8   O  1S          0.00000   0.00000   0.00000   0.00000   0.00000
  77        2S          0.00000   0.00000   0.00000   0.00000   0.00000
  78        2PX         0.00000   0.00000   0.00000   0.00000   0.00000
  79        2PY         0.00000   0.00000   0.00000   0.00000   0.00000
  80        2PZ         0.00000   0.00000   0.00000   0.00000   0.00000
  81        3S          0.00000  -0.00007  -0.00043   0.00005   0.00000
  82        3PX         0.00001  -0.00029  -0.00041   0.00011   0.00000
  83        3PY         0.00001  -0.00024  -0.00084   0.00007   0.00000
  84        3PZ         0.00000   0.00000   0.00000   0.00000   0.00002
  85        4XX         0.00000   0.00000   0.00000   0.00000   0.00000
  86        4YY         0.00000   0.00000   0.00000   0.00000   0.00000
  87        4ZZ         0.00000   0.00000   0.00000   0.00000   0.00000
  88        4XY         0.00000   0.00000   0.00000   0.00000   0.00000
  89        4XZ         0.00000   0.00000   0.00000   0.00000   0.00000
  90        4YZ         0.00000   0.00000   0.00000   0.00000   0.00000
  91 9   H  1S          0.00000  -0.00004   0.00072   0.00008   0.00000
  92        2S         -0.00018   0.00253   0.00952  -0.00064   0.00000
  93        3PX         0.00000   0.00002   0.00014   0.00002   0.00000
  94        3PY         0.00000   0.00001   0.00005   0.00000   0.00000
  95        3PZ         0.00000   0.00000   0.00000   0.00000   0.00001
                          36        37        38        39        40
  36        3S          0.73042
  37        3PX         0.00000   0.23251
  38        3PY         0.00000   0.00000   0.24117
  39        3PZ         0.00000   0.00000   0.00000   0.19274
  40        4XX        -0.00523   0.00000   0.00000   0.00000   0.00082
  41        4YY        -0.01374   0.00000   0.00000   0.00000  -0.00026
  42        4ZZ        -0.00416   0.00000   0.00000   0.00000   0.00008
  43        4XY         0.00000   0.00000   0.00000   0.00000   0.00000
  44        4XZ         0.00000   0.00000   0.00000   0.00000   0.00000
  45        4YZ         0.00000   0.00000   0.00000   0.00000   0.00000
  46 4   O  1S          0.00000   0.00001   0.00001   0.00000   0.00000
  47        2S          0.00002  -0.00023  -0.00030   0.00000   0.00000
  48        2PX        -0.00014  -0.00019  -0.00095   0.00000   0.00000
  49        2PY        -0.00029  -0.00098  -0.00202   0.00000   0.00000
  50        2PZ         0.00000   0.00000   0.00000  -0.00026   0.00000
  51        3S          0.00007  -0.00215  -0.00211   0.00000   0.00001
  52        3PX        -0.00112  -0.00022  -0.00676   0.00000   0.00000
  53        3PY        -0.00266  -0.00730  -0.01268   0.00000  -0.00001
  54        3PZ         0.00000   0.00000   0.00000  -0.00266   0.00000
  55        4XX         0.00002   0.00003  -0.00002   0.00000   0.00000
  56        4YY        -0.00003  -0.00001  -0.00004   0.00000   0.00000
  57        4ZZ         0.00000   0.00000  -0.00002   0.00000   0.00000
  58        4XY         0.00000   0.00001   0.00004   0.00000   0.00000
  59        4XZ         0.00000   0.00000   0.00000   0.00001   0.00000
  60        4YZ         0.00000   0.00000   0.00000   0.00001   0.00000
  61 5   H  1S          0.00002   0.00006   0.00005  -0.00009   0.00000
  62        2S         -0.00006   0.00097   0.00056  -0.00127   0.00000
  63        3PX         0.00000   0.00000   0.00000   0.00000   0.00000
  64        3PY         0.00000   0.00000  -0.00001   0.00000   0.00000
  65        3PZ         0.00000   0.00000   0.00000   0.00000   0.00000
  66 6   H  1S          0.00002  -0.00037   0.00009   0.00000   0.00000
  67        2S          0.00027  -0.00078  -0.00066   0.00000  -0.00002
  68        3PX         0.00000   0.00000  -0.00001   0.00000   0.00000
  69        3PY         0.00000   0.00000  -0.00001   0.00000   0.00000
  70        3PZ         0.00000   0.00000   0.00000   0.00000   0.00000
  71 7   H  1S          0.00002   0.00006   0.00005  -0.00008   0.00000
  72        2S         -0.00003   0.00102   0.00059  -0.00119   0.00000
  73        3PX         0.00000   0.00000   0.00000   0.00000   0.00000
  74        3PY         0.00000   0.00000  -0.00001   0.00000   0.00000
  75        3PZ         0.00000   0.00000   0.00000   0.00000   0.00000
  76 8   O  1S          0.00000   0.00002   0.00000   0.00000   0.00000
  77        2S          0.00004  -0.00049  -0.00012   0.00000   0.00000
  78        2PX        -0.00025   0.00000   0.00013   0.00000   0.00000
  79        2PY        -0.00026  -0.00056   0.00003   0.00000   0.00000
  80        2PZ         0.00000   0.00000   0.00000   0.00010   0.00000
  81        3S         -0.00090  -0.00543  -0.00002   0.00000  -0.00001
  82        3PX        -0.00252  -0.00039   0.00131   0.00000   0.00012
  83        3PY        -0.00270  -0.00491   0.00028   0.00000   0.00012
  84        3PZ         0.00000   0.00000   0.00000   0.00110   0.00000
  85        4XX        -0.00001  -0.00005  -0.00016   0.00000   0.00000
  86        4YY         0.00003   0.00017   0.00003   0.00000   0.00000
  87        4ZZ         0.00001   0.00000  -0.00004   0.00000   0.00000
  88        4XY        -0.00003   0.00004   0.00003   0.00000   0.00000
  89        4XZ         0.00000   0.00000   0.00000   0.00000   0.00000
  90        4YZ         0.00000   0.00000   0.00000   0.00002   0.00000
  91 9   H  1S          0.00049   0.00730   0.00137   0.00000   0.00012
  92        2S          0.01524   0.02888   0.00020   0.00000   0.00001
  93        3PX         0.00021   0.00062   0.00011   0.00000  -0.00002
  94        3PY         0.00010   0.00024   0.00001   0.00000  -0.00001
  95        3PZ         0.00000   0.00000   0.00000   0.00013   0.00000
                          41        42        43        44        45
  41        4YY         0.00326
  42        4ZZ        -0.00015   0.00036
  43        4XY         0.00000   0.00000   0.00190
  44        4XZ         0.00000   0.00000   0.00000   0.00025
  45        4YZ         0.00000   0.00000   0.00000   0.00000   0.00200
  46 4   O  1S          0.00000   0.00000   0.00000   0.00000   0.00000
  47        2S          0.00000   0.00000   0.00000   0.00000   0.00000
  48        2PX         0.00000   0.00000   0.00000   0.00000   0.00000
  49        2PY         0.00000   0.00000   0.00000   0.00000   0.00000
  50        2PZ         0.00000   0.00000   0.00000   0.00000   0.00000
  51        3S         -0.00003   0.00000  -0.00002   0.00000   0.00000
  52        3PX        -0.00004   0.00000   0.00000   0.00000   0.00000
  53        3PY        -0.00006  -0.00001   0.00002   0.00000   0.00000
  54        3PZ         0.00000   0.00000   0.00000   0.00000  -0.00001
  55        4XX         0.00000   0.00000   0.00000   0.00000   0.00000
  56        4YY         0.00000   0.00000   0.00000   0.00000   0.00000
  57        4ZZ         0.00000   0.00000   0.00000   0.00000   0.00000
  58        4XY         0.00000   0.00000   0.00000   0.00000   0.00000
  59        4XZ         0.00000   0.00000   0.00000   0.00000   0.00000
  60        4YZ         0.00000   0.00000   0.00000   0.00000   0.00000
  61 5   H  1S          0.00000   0.00000   0.00000   0.00000   0.00000
  62        2S          0.00000   0.00000   0.00001   0.00000  -0.00001
  63        3PX         0.00000   0.00000   0.00000   0.00000   0.00000
  64        3PY         0.00000   0.00000   0.00000   0.00000   0.00000
  65        3PZ         0.00000   0.00000   0.00000   0.00000   0.00000
  66 6   H  1S          0.00000   0.00000   0.00000   0.00000   0.00000
  67        2S          0.00001   0.00000  -0.00002   0.00000   0.00000
  68        3PX         0.00000   0.00000   0.00000   0.00000   0.00000
  69        3PY         0.00000   0.00000   0.00000   0.00000   0.00000
  70        3PZ         0.00000   0.00000   0.00000   0.00000   0.00000
  71 7   H  1S          0.00000   0.00000   0.00000   0.00000   0.00000
  72        2S          0.00000   0.00000   0.00001   0.00000  -0.00001
  73        3PX         0.00000   0.00000   0.00000   0.00000   0.00000
  74        3PY         0.00000   0.00000   0.00000   0.00000   0.00000
  75        3PZ         0.00000   0.00000   0.00000   0.00000   0.00000
  76 8   O  1S          0.00000   0.00000   0.00000   0.00000   0.00000
  77        2S          0.00000   0.00000   0.00000   0.00000   0.00000
  78        2PX         0.00000   0.00000   0.00000   0.00000   0.00000
  79        2PY         0.00000   0.00000   0.00000   0.00000   0.00000
  80        2PZ         0.00000   0.00000   0.00000   0.00000   0.00000
  81        3S          0.00002   0.00000  -0.00004   0.00000   0.00000
  82        3PX        -0.00004  -0.00002  -0.00001   0.00000   0.00000
  83        3PY        -0.00001  -0.00001  -0.00004   0.00000   0.00000
  84        3PZ         0.00000   0.00000   0.00000   0.00001   0.00000
  85        4XX         0.00000   0.00000   0.00000   0.00000   0.00000
  86        4YY         0.00000   0.00000   0.00000   0.00000   0.00000
  87        4ZZ         0.00000   0.00000   0.00000   0.00000   0.00000
  88        4XY         0.00000   0.00000   0.00000   0.00000   0.00000
  89        4XZ         0.00000   0.00000   0.00000   0.00000   0.00000
  90        4YZ         0.00000   0.00000   0.00000   0.00000   0.00000
  91 9   H  1S         -0.00002  -0.00001   0.00008   0.00000   0.00000
  92        2S         -0.00031  -0.00001   0.00024   0.00000   0.00000
  93        3PX         0.00000   0.00000   0.00001   0.00000   0.00000
  94        3PY         0.00000   0.00000   0.00000   0.00000   0.00000
  95        3PZ         0.00000   0.00000   0.00000   0.00000   0.00000
                          46        47        48        49        50
  46 4   O  1S          2.08437
  47        2S         -0.04489   0.53510
  48        2PX         0.00000   0.00000   0.51109
  49        2PY         0.00000   0.00000   0.00000   0.57849
  50        2PZ         0.00000   0.00000   0.00000   0.00000   0.80127
  51        3S         -0.04600   0.47592   0.00000   0.00000   0.00000
  52        3PX         0.00000   0.00000   0.17740   0.00000   0.00000
  53        3PY         0.00000   0.00000   0.00000   0.21639   0.00000
  54        3PZ         0.00000   0.00000   0.00000   0.00000   0.33149
  55        4XX        -0.00034  -0.00118   0.00000   0.00000   0.00000
  56        4YY        -0.00034  -0.00105   0.00000   0.00000   0.00000
  57        4ZZ        -0.00023  -0.00545   0.00000   0.00000   0.00000
  58        4XY         0.00000   0.00000   0.00000   0.00000   0.00000
  59        4XZ         0.00000   0.00000   0.00000   0.00000   0.00000
  60        4YZ         0.00000   0.00000   0.00000   0.00000   0.00000
  61 5   H  1S          0.00000   0.00000   0.00000   0.00000   0.00000
  62        2S          0.00000   0.00006  -0.00003   0.00002   0.00032
  63        3PX         0.00000   0.00000   0.00000   0.00000   0.00000
  64        3PY         0.00000   0.00000   0.00000   0.00000   0.00000
  65        3PZ         0.00000   0.00000   0.00000   0.00000   0.00000
  66 6   H  1S          0.00000   0.00000   0.00000   0.00000   0.00000
  67        2S          0.00000   0.00002   0.00009   0.00001   0.00000
  68        3PX         0.00000   0.00000   0.00000   0.00000   0.00000
  69        3PY         0.00000   0.00000   0.00000   0.00000   0.00000
  70        3PZ         0.00000   0.00000   0.00000   0.00000   0.00000
  71 7   H  1S          0.00000   0.00000   0.00000   0.00000   0.00000
  72        2S          0.00000   0.00007  -0.00005   0.00003   0.00038
  73        3PX         0.00000   0.00000   0.00000   0.00000   0.00000
  74        3PY         0.00000   0.00000   0.00000   0.00000   0.00000
  75        3PZ         0.00000   0.00000   0.00000   0.00000   0.00000
  76 8   O  1S          0.00000   0.00001  -0.00001  -0.00002   0.00000
  77        2S          0.00001  -0.00082   0.00149   0.00178   0.00000
  78        2PX        -0.00001   0.00159   0.01037   0.00847   0.00000
  79        2PY         0.00000   0.00061   0.00884   0.00453   0.00000
  80        2PZ         0.00000   0.00000   0.00000   0.00000  -0.00110
  81        3S          0.00103  -0.01640  -0.00599   0.00601   0.00000
  82        3PX         0.00029  -0.00019   0.01504   0.01875   0.00000
  83        3PY         0.00034  -0.00268   0.01818   0.00328   0.00000
  84        3PZ         0.00000   0.00000   0.00000   0.00000  -0.00997
  85        4XX        -0.00004   0.00122   0.00078   0.00339   0.00000
  86        4YY        -0.00001   0.00045   0.00171  -0.00065   0.00000
  87        4ZZ         0.00000  -0.00001   0.00001  -0.00001   0.00000
  88        4XY        -0.00006   0.00156   0.00148   0.00083   0.00000
  89        4XZ         0.00000   0.00000   0.00000   0.00000   0.00073
  90        4YZ         0.00000   0.00000   0.00000   0.00000   0.00069
  91 9   H  1S          0.00000  -0.00005   0.00005  -0.00063   0.00000
  92        2S         -0.00009   0.00087   0.00099  -0.00907   0.00000
  93        3PX         0.00000   0.00000   0.00000   0.00003   0.00000
  94        3PY         0.00000   0.00000   0.00000   0.00004   0.00000
  95        3PZ         0.00000   0.00000   0.00000   0.00000   0.00000
                          51        52        53        54        55
  51        3S          0.79924
  52        3PX         0.00000   0.25181
  53        3PY         0.00000   0.00000   0.32718
  54        3PZ         0.00000   0.00000   0.00000   0.54683
  55        4XX        -0.00780   0.00000   0.00000   0.00000   0.00146
  56        4YY        -0.00768   0.00000   0.00000   0.00000   0.00028
  57        4ZZ        -0.00872   0.00000   0.00000   0.00000   0.00006
  58        4XY         0.00000   0.00000   0.00000   0.00000   0.00000
  59        4XZ         0.00000   0.00000   0.00000   0.00000   0.00000
  60        4YZ         0.00000   0.00000   0.00000   0.00000   0.00000
  61 5   H  1S         -0.00006  -0.00022   0.00001  -0.00008   0.00000
  62        2S          0.00056  -0.00032   0.00009   0.00213  -0.00001
  63        3PX         0.00000   0.00000   0.00000   0.00002   0.00000
  64        3PY         0.00000   0.00000   0.00000   0.00000   0.00000
  65        3PZ         0.00000   0.00000   0.00000   0.00000   0.00000
  66 6   H  1S          0.00000   0.00001   0.00000   0.00000   0.00000
  67        2S          0.00025   0.00128   0.00023   0.00000  -0.00001
  68        3PX         0.00000   0.00000   0.00000   0.00000   0.00000
  69        3PY         0.00000   0.00000   0.00000   0.00000   0.00000
  70        3PZ         0.00000   0.00000   0.00000   0.00000   0.00000
  71 7   H  1S         -0.00008  -0.00027   0.00002  -0.00008   0.00000
  72        2S          0.00065  -0.00046   0.00013   0.00247  -0.00001
  73        3PX         0.00000   0.00000   0.00000   0.00002   0.00000
  74        3PY         0.00000   0.00000   0.00000   0.00000   0.00000
  75        3PZ         0.00000   0.00000   0.00000   0.00000   0.00000
  76 8   O  1S          0.00089   0.00014  -0.00040   0.00000  -0.00004
  77        2S         -0.01455   0.00039   0.00584   0.00000   0.00122
  78        2PX        -0.00691   0.01339   0.01606   0.00000   0.00067
  79        2PY        -0.00758   0.01637   0.00406   0.00000   0.00265
  80        2PZ         0.00000   0.00000   0.00000  -0.01080   0.00000
  81        3S         -0.05623  -0.02621   0.01554   0.00000   0.00259
  82        3PX        -0.03006   0.00792   0.02445   0.00000   0.00108
  83        3PY        -0.02588   0.02379  -0.00286   0.00000   0.00422
  84        3PZ         0.00000   0.00000   0.00000  -0.04105   0.00000
  85        4XX         0.00049   0.00077   0.00605   0.00000   0.00012
  86        4YY         0.00146   0.00405  -0.00198   0.00000  -0.00005
  87        4ZZ         0.00001   0.00009  -0.00008   0.00000  -0.00001
  88        4XY         0.00105   0.00053   0.00022   0.00000   0.00024
  89        4XZ         0.00000   0.00000   0.00000   0.00149   0.00000
  90        4YZ         0.00000   0.00000   0.00000   0.00161   0.00000
  91 9   H  1S         -0.00010   0.00106  -0.00946   0.00000  -0.00005
  92        2S          0.00938   0.00498  -0.03387   0.00000  -0.00058
  93        3PX        -0.00007  -0.00005   0.00033   0.00000   0.00000
  94        3PY        -0.00017  -0.00002   0.00031   0.00000   0.00000
  95        3PZ         0.00000   0.00000   0.00000  -0.00013   0.00000
                          56        57        58        59        60
  56        4YY         0.00173
  57        4ZZ         0.00011   0.00031
  58        4XY         0.00000   0.00000   0.00127
  59        4XZ         0.00000   0.00000   0.00000   0.00029
  60        4YZ         0.00000   0.00000   0.00000   0.00000   0.00029
  61 5   H  1S          0.00000   0.00000   0.00000   0.00000   0.00000
  62        2S         -0.00001   0.00000   0.00000   0.00000   0.00000
  63        3PX         0.00000   0.00000   0.00000   0.00000   0.00000
  64        3PY         0.00000   0.00000   0.00000   0.00000   0.00000
  65        3PZ         0.00000   0.00000   0.00000   0.00000   0.00000
  66 6   H  1S          0.00000   0.00000   0.00000   0.00000   0.00000
  67        2S          0.00000   0.00000   0.00000   0.00000   0.00000
  68        3PX         0.00000   0.00000   0.00000   0.00000   0.00000
  69        3PY         0.00000   0.00000   0.00000   0.00000   0.00000
  70        3PZ         0.00000   0.00000   0.00000   0.00000   0.00000
  71 7   H  1S          0.00000   0.00000   0.00000   0.00000   0.00000
  72        2S         -0.00001   0.00000   0.00000   0.00000   0.00000
  73        3PX         0.00000   0.00000   0.00000   0.00000   0.00000
  74        3PY         0.00000   0.00000   0.00000   0.00000   0.00000
  75        3PZ         0.00000   0.00000   0.00000   0.00000   0.00000
  76 8   O  1S         -0.00002   0.00000  -0.00006   0.00000   0.00000
  77        2S          0.00054  -0.00003   0.00159   0.00000   0.00000
  78        2PX         0.00243   0.00003   0.00235   0.00000   0.00000
  79        2PY         0.00013   0.00002   0.00113   0.00000   0.00000
  80        2PZ         0.00000   0.00000   0.00000   0.00068   0.00047
  81        3S          0.00038  -0.00004   0.00103   0.00000   0.00000
  82        3PX         0.00501   0.00034   0.00105   0.00000   0.00000
  83        3PY         0.00023   0.00020   0.00025   0.00000   0.00000
  84        3PZ         0.00000   0.00000   0.00000   0.00142   0.00097
  85        4XX         0.00049   0.00001   0.00028   0.00000   0.00000
  86        4YY        -0.00001  -0.00001   0.00004   0.00000   0.00000
  87        4ZZ         0.00000   0.00000  -0.00001   0.00000   0.00000
  88        4XY         0.00002  -0.00001   0.00016   0.00000   0.00000
  89        4XZ         0.00000   0.00000   0.00000   0.00006   0.00007
  90        4YZ         0.00000   0.00000   0.00000  -0.00001   0.00000
  91 9   H  1S          0.00020   0.00000   0.00002   0.00000   0.00000
  92        2S         -0.00045  -0.00012  -0.00011   0.00000   0.00000
  93        3PX         0.00001   0.00000   0.00000   0.00000   0.00000
  94        3PY         0.00003   0.00000   0.00002   0.00000   0.00000
  95        3PZ         0.00000   0.00000   0.00000   0.00000   0.00000
                          61        62        63        64        65
  61 5   H  1S          0.21716
  62        2S          0.09342   0.10886
  63        3PX         0.00000   0.00000   0.00025
  64        3PY         0.00000   0.00000   0.00000   0.00030
  65        3PZ         0.00000   0.00000   0.00000   0.00000   0.00033
  66 6   H  1S         -0.00047  -0.00566   0.00007   0.00003   0.00000
  67        2S         -0.00604  -0.01385   0.00025   0.00007  -0.00008
  68        3PX         0.00000  -0.00007   0.00000   0.00000   0.00000
  69        3PY         0.00004   0.00010   0.00000   0.00000   0.00000
  70        3PZ         0.00006   0.00021   0.00000   0.00000   0.00000
  71 7   H  1S         -0.00040  -0.00517   0.00000   0.00000   0.00012
  72        2S         -0.00514  -0.01489   0.00000   0.00001   0.00026
  73        3PX         0.00000   0.00000   0.00000   0.00000   0.00000
  74        3PY         0.00000  -0.00001   0.00000   0.00000   0.00000
  75        3PZ         0.00012   0.00027   0.00000   0.00000   0.00001
  76 8   O  1S          0.00000   0.00000   0.00000   0.00000   0.00000
  77        2S          0.00000   0.00000   0.00000   0.00000   0.00000
  78        2PX         0.00000   0.00000   0.00000   0.00000   0.00000
  79        2PY         0.00000   0.00000   0.00000   0.00000   0.00000
  80        2PZ         0.00000   0.00000   0.00000   0.00000   0.00000
  81        3S          0.00000   0.00001   0.00000   0.00000   0.00000
  82        3PX         0.00000   0.00006   0.00000   0.00000   0.00000
  83        3PY         0.00000  -0.00003   0.00000   0.00000   0.00000
  84        3PZ         0.00000  -0.00003   0.00000   0.00000   0.00000
  85        4XX         0.00000   0.00000   0.00000   0.00000   0.00000
  86        4YY         0.00000   0.00000   0.00000   0.00000   0.00000
  87        4ZZ         0.00000   0.00000   0.00000   0.00000   0.00000
  88        4XY         0.00000   0.00000   0.00000   0.00000   0.00000
  89        4XZ         0.00000   0.00000   0.00000   0.00000   0.00000
  90        4YZ         0.00000   0.00000   0.00000   0.00000   0.00000
  91 9   H  1S          0.00000   0.00000   0.00000   0.00000   0.00000
  92        2S          0.00000  -0.00008   0.00000   0.00000   0.00000
  93        3PX         0.00000   0.00000   0.00000   0.00000   0.00000
  94        3PY         0.00000   0.00000   0.00000   0.00000   0.00000
  95        3PZ         0.00000   0.00000   0.00000   0.00000   0.00000
                          66        67        68        69        70
  66 6   H  1S          0.21778
  67        2S          0.09867   0.12163
  68        3PX         0.00000   0.00000   0.00035
  69        3PY         0.00000   0.00000   0.00000   0.00025
  70        3PZ         0.00000   0.00000   0.00000   0.00000   0.00025
  71 7   H  1S         -0.00047  -0.00609   0.00000   0.00005   0.00005
  72        2S         -0.00569  -0.01420  -0.00007   0.00012   0.00019
  73        3PX         0.00007   0.00025   0.00000   0.00000   0.00000
  74        3PY         0.00003   0.00006   0.00000   0.00000   0.00000
  75        3PZ        -0.00001  -0.00009   0.00000   0.00000   0.00000
  76 8   O  1S          0.00000   0.00000   0.00000   0.00000   0.00000
  77        2S          0.00000   0.00000   0.00000   0.00000   0.00000
  78        2PX         0.00000   0.00000   0.00000   0.00000   0.00000
  79        2PY         0.00000   0.00000   0.00000   0.00000   0.00000
  80        2PZ         0.00000   0.00000   0.00000   0.00000   0.00000
  81        3S          0.00000   0.00001   0.00000   0.00000   0.00000
  82        3PX         0.00000  -0.00004   0.00000   0.00000   0.00000
  83        3PY         0.00000   0.00000   0.00000   0.00000   0.00000
  84        3PZ         0.00000   0.00000   0.00000   0.00000   0.00000
  85        4XX         0.00000   0.00000   0.00000   0.00000   0.00000
  86        4YY         0.00000   0.00000   0.00000   0.00000   0.00000
  87        4ZZ         0.00000   0.00000   0.00000   0.00000   0.00000
  88        4XY         0.00000   0.00000   0.00000   0.00000   0.00000
  89        4XZ         0.00000   0.00000   0.00000   0.00000   0.00000
  90        4YZ         0.00000   0.00000   0.00000   0.00000   0.00000
  91 9   H  1S          0.00000   0.00000   0.00000   0.00000   0.00000
  92        2S          0.00000  -0.00005   0.00000   0.00000   0.00000
  93        3PX         0.00000   0.00000   0.00000   0.00000   0.00000
  94        3PY         0.00000   0.00000   0.00000   0.00000   0.00000
  95        3PZ         0.00000   0.00000   0.00000   0.00000   0.00000
                          71        72        73        74        75
  71 7   H  1S          0.21722
  72        2S          0.09368   0.11061
  73        3PX         0.00000   0.00000   0.00025
  74        3PY         0.00000   0.00000   0.00000   0.00030
  75        3PZ         0.00000   0.00000   0.00000   0.00000   0.00033
  76 8   O  1S          0.00000   0.00000   0.00000   0.00000   0.00000
  77        2S          0.00000   0.00000   0.00000   0.00000   0.00000
  78        2PX         0.00000   0.00000   0.00000   0.00000   0.00000
  79        2PY         0.00000   0.00000   0.00000   0.00000   0.00000
  80        2PZ         0.00000   0.00000   0.00000   0.00000   0.00000
  81        3S          0.00000   0.00001   0.00000   0.00000   0.00000
  82        3PX         0.00000   0.00007   0.00000   0.00000   0.00000
  83        3PY         0.00000  -0.00004   0.00000   0.00000   0.00000
  84        3PZ         0.00000  -0.00003   0.00000   0.00000   0.00000
  85        4XX         0.00000   0.00000   0.00000   0.00000   0.00000
  86        4YY         0.00000   0.00000   0.00000   0.00000   0.00000
  87        4ZZ         0.00000   0.00000   0.00000   0.00000   0.00000
  88        4XY         0.00000   0.00000   0.00000   0.00000   0.00000
  89        4XZ         0.00000   0.00000   0.00000   0.00000   0.00000
  90        4YZ         0.00000   0.00000   0.00000   0.00000   0.00000
  91 9   H  1S          0.00000   0.00000   0.00000   0.00000   0.00000
  92        2S          0.00000  -0.00008   0.00000   0.00000   0.00000
  93        3PX         0.00000   0.00000   0.00000   0.00000   0.00000
  94        3PY         0.00000   0.00000   0.00000   0.00000   0.00000
  95        3PZ         0.00000   0.00000   0.00000   0.00000   0.00000
                          76        77        78        79        80
  76 8   O  1S          2.08036
  77        2S         -0.04396   0.53765
  78        2PX         0.00000   0.00000   0.57602
  79        2PY         0.00000   0.00000   0.00000   0.52528
  80        2PZ         0.00000   0.00000   0.00000   0.00000   0.83786
  81        3S         -0.04116   0.43688   0.00000   0.00000   0.00000
  82        3PX         0.00000   0.00000   0.19660   0.00000   0.00000
  83        3PY         0.00000   0.00000   0.00000   0.15467   0.00000
  84        3PZ         0.00000   0.00000   0.00000   0.00000   0.33387
  85        4XX        -0.00034  -0.00079   0.00000   0.00000   0.00000
  86        4YY        -0.00036   0.00006   0.00000   0.00000   0.00000
  87        4ZZ        -0.00029  -0.00316   0.00000   0.00000   0.00000
  88        4XY         0.00000   0.00000   0.00000   0.00000   0.00000
  89        4XZ         0.00000   0.00000   0.00000   0.00000   0.00000
  90        4YZ         0.00000   0.00000   0.00000   0.00000   0.00000
  91 9   H  1S         -0.00105   0.01913   0.02375   0.06092   0.00000
  92        2S          0.00098  -0.01279   0.00423   0.01687   0.00000
  93        3PX        -0.00016   0.00214  -0.00002   0.00336   0.00000
  94        3PY        -0.00035   0.00481   0.00243   0.00291   0.00000
  95        3PZ         0.00000   0.00000   0.00000   0.00000   0.00316
                          81        82        83        84        85
  81        3S          0.69982
  82        3PX         0.00000   0.26992
  83        3PY         0.00000   0.00000   0.18435
  84        3PZ         0.00000   0.00000   0.00000   0.53012
  85        4XX        -0.00917   0.00000   0.00000   0.00000   0.00312
  86        4YY        -0.00607   0.00000   0.00000   0.00000   0.00018
  87        4ZZ        -0.00466   0.00000   0.00000   0.00000   0.00005
  88        4XY         0.00000   0.00000   0.00000   0.00000   0.00000
  89        4XZ         0.00000   0.00000   0.00000   0.00000   0.00000
  90        4YZ         0.00000   0.00000   0.00000   0.00000   0.00000
  91 9   H  1S         -0.00141   0.03342   0.07455   0.00000   0.00160
  92        2S         -0.05866   0.00945   0.03028   0.00000  -0.00028
  93        3PX         0.00179   0.00049   0.00156   0.00000   0.00002
  94        3PY         0.00310   0.00120   0.00020   0.00000   0.00019
  95        3PZ         0.00000   0.00000   0.00000   0.00521   0.00000
                          86        87        88        89        90
  86        4YY         0.00136
  87        4ZZ         0.00005   0.00016
  88        4XY         0.00000   0.00000   0.00169
  89        4XZ         0.00000   0.00000   0.00000   0.00084
  90        4YZ         0.00000   0.00000   0.00000   0.00000   0.00052
  91 9   H  1S          0.00499   0.00000   0.00362   0.00000   0.00000
  92        2S          0.00352   0.00037   0.00040   0.00000   0.00000
  93        3PX         0.00012  -0.00001  -0.00003   0.00000   0.00000
  94        3PY         0.00010  -0.00002   0.00010   0.00000   0.00000
  95        3PZ         0.00000   0.00000   0.00000   0.00012   0.00015
                          91        92        93        94        95
  91 9   H  1S          0.19869
  92        2S          0.06043   0.07643
  93        3PX         0.00000   0.00000   0.00092
  94        3PY         0.00000   0.00000   0.00000   0.00116
  95        3PZ         0.00000   0.00000   0.00000   0.00000   0.00074
     Gross orbital populations:
                           1
   1 1   C  1S          1.99445
   2        2S          0.73090
   3        2PX         0.61830
   4        2PY         0.71581
   5        2PZ         0.56322
   6        3S          0.38457
   7        3PX         0.18363
   8        3PY         0.06205
   9        3PZ         0.33338
  10        4XX         0.00078
  11        4YY         0.01104
  12        4ZZ        -0.01606
  13        4XY         0.02137
  14        4XZ         0.00333
  15        4YZ         0.01424
  16 2   C  1S          1.99459
  17        2S          0.66898
  18        2PX         0.69152
  19        2PY         0.70089
  20        2PZ         0.72026
  21        3S          0.65534
  22        3PX         0.30033
  23        3PY         0.32207
  24        3PZ         0.38417
  25        4XX         0.00434
  26        4YY         0.00292
  27        4ZZ         0.00315
  28        4XY         0.00826
  29        4XZ         0.00171
  30        4YZ         0.00728
  31 3   N  1S          1.99489
  32        2S          0.83429
  33        2PX         0.79029
  34        2PY         0.84037
  35        2PZ         0.64944
  36        3S          1.04138
  37        3PX         0.52466
  38        3PY         0.50901
  39        3PZ         0.48143
  40        4XX        -0.00627
  41        4YY        -0.00434
  42        4ZZ        -0.01062
  43        4XY         0.01004
  44        4XZ         0.00151
  45        4YZ         0.01116
  46 4   O  1S          1.99437
  47        2S          0.93907
  48        2PX         0.74841
  49        2PY         0.83982
  50        2PZ         1.12573
  51        3S          1.03894
  52        3PX         0.48645
  53        3PY         0.58429
  54        3PZ         0.83959
  55        4XX         0.00576
  56        4YY         0.00316
  57        4ZZ        -0.01318
  58        4XY         0.00978
  59        4XZ         0.00250
  60        4YZ         0.00191
  61 5   H  1S          0.52672
  62        2S          0.27709
  63        3PX         0.00305
  64        3PY         0.00438
  65        3PZ         0.00557
  66 6   H  1S          0.52835
  67        2S          0.28608
  68        3PX         0.00617
  69        3PY         0.00351
  70        3PZ         0.00321
  71 7   H  1S          0.52692
  72        2S          0.27826
  73        3PX         0.00306
  74        3PY         0.00451
  75        3PZ         0.00543
  76 8   O  1S          1.99418
  77        2S          0.93643
  78        2PX         0.84884
  79        2PY         0.79374
  80        2PZ         1.16401
  81        3S          0.93934
  82        3PX         0.54000
  83        3PY         0.45567
  84        3PZ         0.82001
  85        4XX         0.00800
  86        4YY         0.00881
  87        4ZZ        -0.00760
  88        4XY         0.01185
  89        4XZ         0.00333
  90        4YZ         0.00297
  91 9   H  1S          0.47473
  92        2S          0.14495
  93        3PX         0.01202
  94        3PY         0.01635
  95        3PZ         0.00938
          Condensed to atoms (all electrons):
              1          2          3          4          5          6
     1  C    4.557685   0.332550   0.778073   0.077652  -0.027998  -0.034446
     2  C    0.332550   5.087190  -0.064142  -0.022667   0.378538   0.375252
     3  N    0.778073  -0.064142   6.951319  -0.046897   0.000303  -0.001756
     4  O    0.077652  -0.022667  -0.046897   8.596661   0.002466   0.001887
     5  H   -0.027998   0.378538   0.000303   0.002466   0.513742  -0.025348
     6  H   -0.034446   0.375252  -0.001756   0.001887  -0.025348   0.537595
     7  H   -0.027725   0.377184   0.000510   0.002798  -0.024819  -0.025775
     8  O   -0.014767   0.000066  -0.017427   0.031409   0.000011  -0.000039
     9  H   -0.020000   0.001828   0.067257  -0.036701  -0.000079  -0.000050
              7          8          9
     1  C   -0.027725  -0.014767  -0.020000
     2  C    0.377184   0.000066   0.001828
     3  N    0.000510  -0.017427   0.067257
     4  O    0.002798   0.031409  -0.036701
     5  H   -0.024819   0.000011  -0.000079
     6  H   -0.025775  -0.000039  -0.000050
     7  H    0.516071   0.000008  -0.000081
     8  O    0.000008   8.273851   0.246472
     9  H   -0.000081   0.246472   0.398789
 Mulliken atomic charges:
              1
     1  C    0.378975
     2  C   -0.465799
     3  N   -0.667240
     4  O   -0.606609
     5  H    0.183184
     6  H    0.172680
     7  H    0.181828
     8  O   -0.519584
     9  H    0.342564
 Sum of Mulliken atomic charges =  -1.00000
 Mulliken charges with hydrogens summed into heavy atoms:
              1
     1  C    0.378975
     2  C    0.071894
     3  N   -0.667240
     4  O   -0.606609
     8  O   -0.177020
 Sum of Mulliken charges with hydrogens summed into heavy atoms =  -1.00000
 APT atomic charges:
              1
     1  C   -0.168069
     2  C   -1.165404
     3  N   -0.186220
     4  O   -0.537779
     5  H    0.386600
     6  H    0.540249
     7  H    0.379678
     8  O   -0.514814
     9  H    0.265759
 Sum of APT charges=  -1.00000
 APT Atomic charges with hydrogens summed into heavy atoms:
              1
     1  C   -0.168069
     2  C    0.141124
     3  N   -0.186220
     4  O   -0.537779
     5  H    0.000000
     6  H    0.000000
     7  H    0.000000
     8  O   -0.249055
     9  H    0.000000
 Sum of APT charges=  -1.00000
 Electronic spatial extent (au):  <R**2>=            459.5897
 Charge=             -1.0000 electrons
 Dipole moment (field-independent basis, Debye):
    X=             -6.5025    Y=             -0.6850    Z=              0.0117  Tot=              6.5385
 Quadrupole moment (field-independent basis, Debye-Ang):
   XX=            -36.4453   YY=            -39.7083   ZZ=            -30.8439
   XY=              6.4971   XZ=             -0.0129   YZ=             -0.0069
 Traceless Quadrupole moment (field-independent basis, Debye-Ang):
   XX=             -0.7795   YY=             -4.0424   ZZ=              4.8219
   XY=              6.4971   XZ=             -0.0129   YZ=             -0.0069
 Octapole moment (field-independent basis, Debye-Ang**2):
  XXX=            -18.5738  YYY=            -14.9539  ZZZ=              0.0815  XYY=              1.9960
  XXY=              2.1183  XXZ=             -0.0062  XZZ=              0.4657  YZZ=             -2.0606
  YYZ=             -0.0091  XYZ=              0.0384
 Hexadecapole moment (field-independent basis, Debye-Ang**3):
 XXXX=           -380.2019 YYYY=           -208.7423 ZZZZ=            -32.5406 XXXY=              7.6780
 XXXZ=              0.1075 YYYX=             11.2303 YYYZ=              0.0863 ZZZX=             -0.1507
 ZZZY=             -0.0746 XXYY=            -88.7735 XXZZ=            -67.0361 YYZZ=            -34.7279
 XXYZ=             -0.1118 YYXZ=              0.0012 ZZXY=              2.4108
 N-N= 1.592280320714D+02 E-N=-9.942724076731D+02  KE= 2.816038951569D+02
 Orbital energies and kinetic energies (alpha):
                                 1                 2
   1         O               -18.970072         29.078903
   2         O               -18.923177         29.079179
   3         O               -14.139024         22.017746
   4         O               -10.088563         15.928784
   5         O               -10.065404         15.937954
   6         O                -0.975542          2.581245
   7         O                -0.821188          2.130640
   8         O                -0.734559          2.878208
   9         O                -0.690839          1.643021
  10         O                -0.446199          1.499507
  11         O                -0.417065          1.590437
  12         O                -0.384639          0.976756
  13         O                -0.369539          1.346176
  14         O                -0.322888          2.254980
  15         O                -0.302655          1.893841
  16         O                -0.282127          1.816020
  17         O                -0.259142          1.630329
  18         O                -0.248323          1.747338
  19         O                -0.163723          2.249548
  20         O                -0.124591          2.521335
  21         V                 0.035352          1.617118
  22         V                 0.049038          2.123397
  23         V                 0.078312          3.028599
  24         V                 0.132976          1.188329
  25         V                 0.179809          1.251604
  26         V                 0.186818          1.135272
  27         V                 0.199260          1.727298
  28         V                 0.260605          1.863481
  29         V                 0.355292          1.362714
  30         V                 0.559156          1.894373
  31         V                 0.598701          1.931240
  32         V                 0.603076          2.220608
  33         V                 0.639334          1.934034
  34         V                 0.662190          2.013422
  35         V                 0.689851          2.252981
  36         V                 0.751506          2.536491
  37         V                 0.794690          2.737187
  38         V                 0.803961          2.478462
  39         V                 0.828703          2.728356
  40         V                 0.859044          2.348545
  41         V                 0.867366          2.783004
  42         V                 0.901465          2.544658
  43         V                 0.917064          3.631321
  44         V                 0.948602          2.499391
  45         V                 0.968220          3.004819
  46         V                 0.980213          2.703163
  47         V                 1.041775          3.462584
  48         V                 1.114390          3.128253
  49         V                 1.144698          2.801005
  50         V                 1.227675          2.988154
  51         V                 1.303437          2.455744
  52         V                 1.355079          2.546101
  53         V                 1.395179          2.598524
  54         V                 1.496690          2.724005
  55         V                 1.536236          2.582688
  56         V                 1.576065          2.647114
  57         V                 1.585994          2.584964
  58         V                 1.625339          2.585902
  59         V                 1.697758          2.737766
  60         V                 1.723711          2.867046
  61         V                 1.731432          2.740877
  62         V                 1.760521          2.926290
  63         V                 1.908416          2.904514
  64         V                 1.938477          3.031379
  65         V                 1.984726          3.054993
  66         V                 2.022653          3.650932
  67         V                 2.035125          2.851378
  68         V                 2.047601          3.525156
  69         V                 2.083699          3.155718
  70         V                 2.104718          3.475559
  71         V                 2.240380          3.455721
  72         V                 2.343726          3.442932
  73         V                 2.348372          3.389714
  74         V                 2.361319          3.608970
  75         V                 2.430491          3.487667
  76         V                 2.492541          3.815014
  77         V                 2.634928          3.810614
  78         V                 2.674153          3.713853
  79         V                 2.726279          3.897803
  80         V                 2.748864          3.568526
  81         V                 2.851736          4.158597
  82         V                 2.959865          4.125193
  83         V                 3.019781          4.093901
  84         V                 3.029766          4.226011
  85         V                 3.122348          5.236067
  86         V                 3.153527          4.516918
  87         V                 3.349021          5.165324
  88         V                 3.486143          5.034255
  89         V                 3.510414          5.083836
  90         V                 3.568705          7.895281
  91         V                 3.654675          6.983697
  92         V                 3.941716         10.191934
  93         V                 4.169775         10.292119
  94         V                 4.329296         10.157333
  95         V                 4.730612         10.128922
 Total kinetic energy from orbitals= 2.816038951569D+02
  Exact polarizability:   0.000   0.000   0.000   0.000   0.000   0.000
 Approx polarizability:  74.998   3.248  98.370   0.060   0.006  32.409
 No NMR shielding tensors so no spin-rotation constants.
 Leave Link  601 at Thu Apr 27 10:51:42 2023, MaxMem=   33554432 cpu:       2.2
 (Enter /local/share/g09/l607.exe)
 Leave Link  607 at Thu Apr 27 10:51:43 2023, MaxMem=   33554432 cpu:       1.3
 (Enter /local/share/g09/linda-exe/l701.exel)
 Compute integral second derivatives.
 ... and contract with generalized density number  0.
 D2PCM: PCM CHGder 2nd derivatives, FixD1E=F FixD2E=F DoIter=F DoCFld=F I1PDM=0
 GePol: Maximum number of non-zero 2nd derivatives   =     246
 Leave Link  701 at Thu Apr 27 10:52:08 2023, MaxMem=   33554432 cpu:      23.4
 (Enter /local/share/g09/l702.exe)
 L702 exits ... SP integral derivatives will be done elsewhere.
 Leave Link  702 at Thu Apr 27 10:52:08 2023, MaxMem=   33554432 cpu:       0.2
 (Enter /local/share/g09/linda-exe/l703.exel)
 Compute integral second derivatives, UseDBF=F ICtDFT=           0.
 Integral derivatives from FoFDir, PRISM(SPDF).
 Calling FoFJK, ICntrl=    100547 FMM=F ISym2X=0 I1Cent= 0 IOpClX= 0 NMat=1 NMatS=1 NMatT=0.
 FoFCou: FMM=F IPFlag=           0 FMFlag=      100000 FMFlg1=         800
         NFxFlg=           0 DoJE=F BraDBF=F KetDBF=F FulRan=T
         Omega=  0.000000  0.000000  1.000000  0.000000  0.000000 ICntrl=  100547 IOpCl=  0
         NMat0=    1 NMatS0=    1 NMatT0=    0 NMatD0=    1 NMtDS0=    0 NMtDT0=    0
         I1Cent=           0 NGrid=           0.
 Symmetry not used in FoFCou.
 Leave Link  703 at Thu Apr 27 10:52:41 2023, MaxMem=   33554432 cpu:      32.4
 (Enter /local/share/g09/l716.exe)
 Dipole        =-2.55829300D+00-2.69488829D-01 4.60280046D-03
 Polarizability= 0.00000000D+00 0.00000000D+00 0.00000000D+00
                 0.00000000D+00 0.00000000D+00 0.00000000D+00
 -------------------------------------------------------------------
 Center     Atomic                   Forces (Hartrees/Bohr)
 Number     Number              X              Y              Z
 -------------------------------------------------------------------
      1        6           0.000003792    0.000010757   -0.000012508
      2        6          -0.000013621    0.000039238    0.000004733
      3        7           0.000042660    0.000010645   -0.000038567
      4        8          -0.000020759   -0.000034803    0.000031378
      5        1          -0.000013379    0.000025266    0.000008728
      6        1          -0.000004841    0.000023953   -0.000006403
      7        1          -0.000008129    0.000007128    0.000007111
      8        8           0.000006004   -0.000066404    0.000011603
      9        1           0.000008273   -0.000015780   -0.000006075
 -------------------------------------------------------------------
 Cartesian Forces:  Max     0.000066404 RMS     0.000023345
 Z-matrix is all fixed cartesians, so copy forces.
 Force constants in Cartesian coordinates: 
                1             2             3             4             5 
      1  0.386624D+00
      2  0.519967D+00  0.101368D+01
      3 -0.312419D-04  0.144818D-03  0.133775D+00
      4 -0.164894D+00 -0.122137D+00  0.256335D-03  0.540143D+00
      5 -0.103752D+00 -0.173810D+00 -0.114194D-03 -0.248695D-01  0.552280D+00
      6  0.142277D-03 -0.918671D-04 -0.779195D-01  0.265654D-03  0.606844D-03
      7 -0.191826D+00 -0.317532D+00 -0.170558D-03  0.636613D-02 -0.236823D-01
      8 -0.360175D+00 -0.824506D+00 -0.234170D-03  0.657902D-02 -0.114533D-01
      9 -0.231274D-03 -0.376909D-03 -0.488054D-01 -0.601278D-04  0.167230D-03
     10  0.640910D-02 -0.184869D-01 -0.980508D-04 -0.159032D-01  0.573885D-02
     11 -0.429674D-01  0.296753D-01  0.742501D-04  0.366927D-02 -0.276005D-03
     12 -0.108234D-04  0.516944D-04 -0.145668D-01  0.196727D-03 -0.116401D-03
     13  0.211754D-03 -0.161356D-01  0.231908D-01 -0.442555D-01  0.135489D-01
     14  0.355199D-03 -0.194540D-01  0.199667D-01  0.126705D-01 -0.128838D+00
     15  0.148961D-02  0.108634D-03  0.347580D-02 -0.189392D-01  0.132810D+00
     16 -0.199679D-01  0.652812D-02 -0.464828D-03 -0.267363D+00  0.107035D+00
     17 -0.221646D-01  0.770244D-02 -0.703424D-03  0.107061D+00 -0.978587D-01
     18  0.179628D-03 -0.811746D-04 -0.199665D-02 -0.571056D-02  0.268108D-02
     19  0.936172D-03 -0.169519D-01 -0.226624D-01 -0.465097D-01  0.196178D-01
     20  0.902930D-03 -0.202356D-01 -0.191209D-01  0.184930D-01 -0.140057D+00
     21 -0.153779D-02  0.289537D-03  0.325882D-02  0.240933D-01 -0.136028D+00
     22 -0.120164D-01 -0.897664D-02 -0.224188D-04 -0.548493D-02  0.393484D-02
     23  0.106221D-01 -0.309021D-01 -0.448403D-05 -0.331486D-02  0.339796D-02
     24  0.302177D-05 -0.159534D-04  0.114915D-02 -0.987009D-04 -0.222413D-04
     25 -0.547643D-02 -0.262748D-01  0.242904D-05 -0.209794D-02  0.242813D-02
     26 -0.278825D-02  0.178513D-01 -0.853691D-05  0.184889D-02 -0.338536D-02
     27 -0.341358D-05 -0.287798D-04  0.162992D-02 -0.343645D-05  0.160638D-04
                6             7             8             9            10 
      6  0.554818D+00
      7 -0.576648D-04  0.184926D+00
      8  0.856848D-04  0.324999D+00  0.876187D+00
      9  0.191817D-01  0.167535D-03  0.323781D-03  0.259675D-01
     10  0.100700D-03 -0.611089D-02  0.208118D-01  0.149630D-04  0.160427D+00
     11 -0.255207D-03  0.155174D-02 -0.458387D-01 -0.673448D-04  0.114096D+00
     12  0.306196D-02 -0.223288D-04 -0.226533D-04  0.827096D-02  0.389997D-03
     13 -0.199124D-01 -0.123250D-02 -0.436224D-03 -0.294781D-02 -0.254966D-04
     14  0.132764D+00 -0.221050D-02  0.128170D-02 -0.237630D-02  0.804518D-03
     15 -0.233649D+00 -0.114604D-02 -0.166753D-02 -0.611029D-03  0.475472D-04
     16 -0.574547D-02  0.295573D-02  0.160574D-02  0.535916D-04 -0.138659D-02
     17  0.271055D-02  0.195540D-02  0.557017D-03  0.754346D-04 -0.150731D-02
     18 -0.435654D-01  0.000000D+00 -0.760049D-05  0.160959D-03  0.373232D-04
     19  0.253884D-01 -0.142414D-02 -0.541865D-03  0.298239D-02  0.894610D-04
     20 -0.135887D+00 -0.230984D-02  0.130073D-02  0.222634D-02  0.858481D-03
     21 -0.222091D+00  0.119377D-02  0.153156D-02 -0.549967D-03 -0.677053D-04
     22 -0.173044D-03 -0.672219D-02  0.200622D-03  0.654346D-05 -0.143517D+00
     23  0.135482D-04  0.274294D-01  0.940755D-02  0.462596D-04 -0.116497D+00
     24 -0.702583D-03  0.147893D-04 -0.105907D-04  0.687505D-03 -0.426808D-03
     25 -0.844765D-05  0.130675D-01  0.695749D-02  0.141950D-04  0.177247D-04
     26  0.530269D-04 -0.102003D-01 -0.693582D-02 -0.184890D-04 -0.581886D-02
     27  0.866504D-03  0.201960D-04  0.151604D-05 -0.430224D-02  0.203402D-05
               11            12            13            14            15 
     11  0.168052D+00
     12  0.508243D-03  0.861832D-02
     13  0.681125D-03 -0.913266D-03  0.458859D-01
     14  0.748106D-03 -0.539925D-03 -0.101669D-01  0.141969D+00
     15 -0.704553D-03 -0.463659D-04  0.205402D-01 -0.142772D+00  0.247514D+00
     16 -0.820440D-03 -0.753084D-05 -0.199111D-03 -0.738580D-03  0.839149D-03
     17  0.203947D-02  0.207158D-04  0.142265D-01 -0.685814D-02 -0.242362D-02
     18  0.528961D-04  0.521144D-03 -0.230292D-01  0.923920D-02  0.958581D-03
     19  0.505990D-03  0.765489D-03 -0.794842D-03 -0.137904D-02 -0.234984D-02
     20  0.815373D-03  0.554619D-03 -0.181256D-02  0.111544D-01  0.147639D-01
     21  0.759771D-03 -0.106017D-03  0.299894D-02 -0.159598D-01 -0.179378D-01
     22 -0.499839D-01 -0.380394D-03 -0.196845D-04  0.100692D-03 -0.405532D-03
     23 -0.109555D+00 -0.366346D-03  0.321739D-03  0.327851D-03 -0.171329D-03
     24 -0.294774D-03 -0.629157D-02  0.148395D-03 -0.211232D-03  0.307602D-03
     25 -0.267328D-01 -0.178697D-04  0.429477D-03  0.564173D-03 -0.758908D-04
     26 -0.456603D-01 -0.899477D-04 -0.227006D-03 -0.331134D-03  0.565680D-04
     27 -0.732821D-04  0.538325D-03 -0.755112D-04 -0.110851D-03 -0.109036D-04
               16            17            18            19            20 
     16  0.290258D+00
     17 -0.113284D+00  0.101813D+00
     18  0.618644D-02 -0.298339D-02  0.414164D-01
     19 -0.964008D-03  0.150142D-01  0.222917D-01  0.482650D-01
     20 -0.446520D-03 -0.710197D-02 -0.887602D-02 -0.164390D-01  0.154133D+00
     21 -0.865258D-03  0.329656D-02  0.200689D-02 -0.263662D-01  0.145989D+00
     22 -0.292379D-02 -0.114083D-02  0.486927D-04 -0.413758D-04  0.186340D-03
     23 -0.101593D-02 -0.827609D-03 -0.151987D-04  0.391550D-03  0.334809D-03
     24  0.443888D-05  0.113709D-04  0.643129D-03 -0.135501D-03  0.246363D-03
     25 -0.409640D-03 -0.160285D-03 -0.432361D-05  0.443411D-03  0.567088D-03
     26  0.113648D-02  0.534405D-03 -0.978643D-05 -0.217831D-03 -0.344188D-03
     27  0.000000D+00 -0.419215D-05 -0.145092D-03  0.859502D-04  0.103876D-03
               21            22            23            24            25 
     21  0.235112D+00
     22  0.476057D-03  0.329461D+00
     23  0.183720D-03 -0.107502D+00  0.420304D+00
     24  0.322527D-03  0.590660D-03  0.257483D-03  0.107135D-01
     25  0.749150D-04 -0.158736D+00  0.189565D+00 -0.100295D-03  0.152761D+00
     26 -0.617118D-04  0.163181D+00 -0.292488D+00  0.395739D-04 -0.146914D+00
     27 -0.148910D-04 -0.140565D-03  0.563470D-04 -0.682924D-02  0.115287D-03
               26            27 
     26  0.330759D+00
     27  0.393031D-04  0.826761D-02
 Leave Link  716 at Thu Apr 27 10:52:42 2023, MaxMem=   33554432 cpu:       0.3
 (Enter /local/share/g09/l123.exe)
 IRC-IRC-IRC-IRC-IRC-IRC-IRC-IRC-IRC-IRC-IRC-IRC-IRC-IRC-IRC-IRC-IRC-IRC
          ******** Start new reaction path calculation ********
 Current Structure is TS -> diagonalize the Hessian.
 Supplied step size of   0.1000 bohr.
    Integration on MW PES will use step size of   0.3215 sqrt(amu)*bohr.
 Point Number:   0          Path Number:   1
 Calculating another point on the path.
 Point Number  1 in REVERSE path direction.
 Using LQA Reaction Path Following.
 IRC-IRC-IRC-IRC-IRC-IRC-IRC-IRC-IRC-IRC-IRC-IRC-IRC-IRC-IRC-IRC-IRC-IRC
 Leave Link  123 at Thu Apr 27 10:52:43 2023, MaxMem=   33554432 cpu:       0.8
 (Enter /local/share/g09/l202.exe)
                          Input orientation:                          
 ---------------------------------------------------------------------
 Center     Atomic      Atomic             Coordinates (Angstroms)
 Number     Number       Type             X           Y           Z
 ---------------------------------------------------------------------
      1          6           0       -0.777028    0.385173   -0.000926
      2          6           0       -1.842923   -0.615388    0.000967
      3          7           0       -0.363544    1.504571   -0.000057
      4          8           0        0.733532   -0.978017   -0.001967
      5          1           0       -1.779036   -1.235913    0.897654
      6          1           0       -2.826590   -0.138136   -0.030008
      7          1           0       -1.742825   -1.278913   -0.860594
      8          8           0        1.864541   -0.049860    0.001450
      9          1           0        1.361651    0.802194    0.001467
 ---------------------------------------------------------------------
                    Distance matrix (angstroms):
                    1          2          3          4          5
     1  C    0.000000
     2  C    1.461936   0.000000
     3  N    1.193324   2.585109   0.000000
     4  O    2.034719   2.601851   2.714190   0.000000
     5  H    2.106985   1.092327   3.212438   2.681199   0.000000
     6  H    2.115515   1.093769   2.960740   3.657958   1.778493
     7  H    2.107362   1.092051   3.223465   2.638204   1.759146
     8  O    2.677153   3.750348   2.716730   1.463103   3.935169
     9  H    2.178958   3.504116   1.862695   1.887776   3.849798
                    6          7          8          9
     6  H    0.000000
     7  H    1.779268   0.000000
     8  O    4.692067   3.907273   0.000000
     9  H    4.292618   3.835613   0.989391   0.000000
 Symmetry turned off by external request.
 Stoichiometry    C2H4NO2(1-)
 Framework group  C1[X(C2H4NO2)]
 Deg. of freedom    21
 Full point group                 C1      NOp   1
 Rotational constants (GHZ):      8.6413499      3.8259917      2.6959913
 Leave Link  202 at Thu Apr 27 10:52:43 2023, MaxMem=   33554432 cpu:       0.2
 (Enter /local/share/g09/l301.exe)
 Standard basis: 6-31G(d,p) (6D, 7F)
 Ernie: Thresh=  0.10000D-02 Tol=  0.10000D-05 Strict=F.
 Integral buffers will be    131072 words long.
 Raffenetti 2 integral format.
 Two-electron integral symmetry is turned off.
    95 basis functions,   168 primitive gaussians,    95 cartesian basis functions
    20 alpha electrons       20 beta electrons
       nuclear repulsion energy       160.0885747341 Hartrees.
 IExCor= 4134 DFT=T Ex+Corr=M06L ExCW=0 ScaHFX=  0.000000
 ScaDFX=  1.000000  1.000000  1.000000  1.000000 ScalE2=  1.000000  1.000000
 IRadAn=      5 IRanWt=     -1 IRanGd=            0 ICorTp=0
 NAtoms=    9 NActive=    9 NUniq=    9 SFac= 1.00D+00 NAtFMM=   50 NAOKFM=F Big=F
 ------------------------------------------------------------------------------
 Polarizable Continuum Model (PCM)
 =================================
 Model                : PCM.
 Atomic radii         : SMD-Coulomb.
 Polarization charges : Total charges.
 Charge compensation  : None.
 Solution method      : Matrix inversion.
 Cavity type          : VdW (van der Waals Surface) (Alpha=1.000).
 Cavity algorithm     : GePol (No added spheres)
                        Default sphere list used, NSphG=    9.
                        Lebedev-Laikov grids with approx.  5.0 points / Ang**2.
                        Smoothing algorithm: Karplus/York (Gamma=1.0000).
                        Polarization charges: spherical gaussians, with
                                              point-specific exponents (IZeta= 3).
                        Self-potential: point-specific (ISelfS= 7).
                        Self-field    : sphere-specific E.n sum rule (ISelfD= 2).
 1st derivatives      : Analytical E(r).r(x)/FMM algorithm (CHGder, D1EAlg=3).
                        Cavity 1st derivative terms included.
 2nd derivatives      : Analytical E(r).r(xy)/FMM algorithm (CHGder, D2EAlg=3).
                        Cavity 2nd derivative terms included.
 Solvent              : Water, Eps=  78.355300 Eps(inf)=   1.777849
 ------------------------------------------------------------------------------
 Spheres list:
 ISph  on   Nord    Re0     Alpha      Xe            Ye            Ze
    1   C      1    1.850   1.000     -0.777028      0.385173     -0.000926
    2   C      2    1.850   1.000     -1.842923     -0.615388      0.000967
    3   N      3    1.890   1.000     -0.363544      1.504571     -0.000057
    4   O      4    1.520   1.000      0.733532     -0.978017     -0.001967
    5   H      5    1.200   1.000     -1.779036     -1.235913      0.897654
    6   H      6    1.200   1.000     -2.826590     -0.138136     -0.030008
    7   H      7    1.200   1.000     -1.742825     -1.278913     -0.860594
    8   O      8    1.520   1.000      1.864541     -0.049860      0.001450
    9   H      9    1.200   1.000      1.361651      0.802194      0.001467
 ------------------------------------------------------------------------------
 GePol: Number of generator spheres                  =       9
 GePol: Total number of spheres                      =       9
 GePol: Number of exposed spheres                    =       9 (100.00%)
 GePol: Number of points                             =     797
 GePol: Average weight of points                     =       0.13
 GePol: Minimum weight of points                     =   0.14D-09
 GePol: Maximum weight of points                     =    0.21991
 GePol: Number of points with low weight             =      27
 GePol: Fraction of low-weight points (<1% of avg)   =       3.39%
 GePol: Cavity surface area                          =    104.620 Ang**2
 GePol: Cavity volume                                =     78.954 Ang**3
 ------------------------------------------------------------------------------
 Atomic radii for non-electrostatic terms: SMD-CDS.
 ------------------------------------------------------------------------------
 PCM non-electrostatic energy =         0.0047078938 Hartrees.
 Nuclear repulsion after PCM non-electrostatic terms =      160.0932826279 Hartrees.
 Leave Link  301 at Thu Apr 27 10:52:44 2023, MaxMem=   33554432 cpu:       0.5
 (Enter /local/share/g09/linda-exe/l302.exel)
 NPDir=0 NMtPBC=     1 NCelOv=     1 NCel=       1 NClECP=     1 NCelD=      1
         NCelK=      1 NCelE2=     1 NClLst=     1 CellRange=     0.0.
 One-electron integrals computed using PRISM.
 NBasis=    95 RedAO= T  NBF=    95
 NBsUse=    95 1.00D-06 NBFU=    95
 Precomputing XC quadrature grid using
 IXCGrd= 2 IRadAn=           5 IRanWt=          -1 IRanGd=           0 AccXCQ= 0.00D+00.
 NRdTot=     735 NPtTot=      197354 NUsed=      202629 NTot=      202661
 NSgBfM=    95    95    95    95    95 NAtAll=     9     9.
 Leave Link  302 at Thu Apr 27 10:52:47 2023, MaxMem=   33554432 cpu:       2.1
 (Enter /local/share/g09/l303.exe)
 DipDrv:  MaxL=1.
 Leave Link  303 at Thu Apr 27 10:52:47 2023, MaxMem=   33554432 cpu:       0.5
 (Enter /local/share/g09/linda-exe/l401.exel)
 Initial guess read from the read-write file.
 B after Tr=     0.000000    0.000000    0.000000
         Rot=    1.000000    0.000000    0.000000    0.000000 Ang=   0.00 deg.
 Guess basis will be translated and rotated to current coordinates.
 Generating alternative initial guess.
 Harris functional with IExCor= 1009 diagonalized for initial guess.
 ExpMin= 1.61D-01 ExpMax= 5.48D+03 ExpMxC= 8.25D+02 IAcc=3 IRadAn=         5 AccDes= 0.00D+00
 HarFok:  IExCor= 1009 AccDes= 0.00D+00 IRadAn=         5 IDoV= 1
 ScaDFX=  1.000000  1.000000  1.000000  1.000000
 FoFCou: FMM=F IPFlag=           0 FMFlag=      100000 FMFlg1=           0
         NFxFlg=           0 DoJE=T BraDBF=F KetDBF=T FulRan=T
         Omega=  0.000000  0.000000  1.000000  0.000000  0.000000 ICntrl=     500 IOpCl=  0
         NMat0=    1 NMatS0=    1 NMatT0=    0 NMatD0=    1 NMtDS0=    0 NMtDT0=    0
         I1Cent=           4 NGrid=           0.
 Symmetry not used in FoFCou.
 Harris En= -283.626992241030    
 Leave Link  401 at Thu Apr 27 10:52:54 2023, MaxMem=   33554432 cpu:       5.6
 (Enter /local/share/g09/linda-exe/l502.exel)
 Closed shell SCF:
 Requested convergence on RMS density matrix=1.00D-08 within 200 cycles.
 Requested convergence on MAX density matrix=1.00D-06.
 Requested convergence on             energy=1.00D-06.
 No special actions if energy rises.
 Using DIIS extrapolation, IDIIS=  1040.
 Two-electron integral symmetry not used.
       202535 words used for storage of precomputed grid.
 Keep J ints in memory in canonical form, NReq=14357399.
 IEnd=      272890 IEndB=      272890 NGot=    33554432 MDV=    22931955
 LenX=    22931955 LenY=    22922489
 Symmetry not used in FoFDir.
 MinBra= 0 MaxBra= 2 Meth= 1.
 IRaf=       0 NMat=   1 IRICut=       1 DoRegI=T DoRafI=F ISym2E= 0 JSym2E=0.

 Cycle   1  Pass 1  IDiag  1:
 E= -283.783982471488    
 DIIS: error= 1.34D-03 at cycle   1 NSaved=   1.
 NSaved= 1 IEnMin= 1 EnMin= -283.783982471488     IErMin= 1 ErrMin= 1.34D-03
 ErrMax= 1.34D-03 EMaxC= 1.00D-01 BMatC= 3.74D-04 BMatP= 3.74D-04
 IDIUse=3 WtCom= 9.87D-01 WtEn= 1.34D-02
 Coeff-Com:  0.100D+01
 Coeff-En:   0.100D+01
 Coeff:      0.100D+01
 Gap=     0.164 Goal=   None    Shift=    0.000
 GapD=    0.164 DampG=1.000 DampE=1.000 DampFc=1.0000 IDamp=-1.
 RMSDP=4.87D-04 MaxDP=5.88D-03              OVMax= 1.93D-02

 Cycle   2  Pass 1  IDiag  1:
 E= -283.784741658338     Delta-E=       -0.000759186850 Rises=F Damp=F
 DIIS: error= 4.18D-04 at cycle   2 NSaved=   2.
 NSaved= 2 IEnMin= 2 EnMin= -283.784741658338     IErMin= 2 ErrMin= 4.18D-04
 ErrMax= 4.18D-04 EMaxC= 1.00D-01 BMatC= 2.55D-05 BMatP= 3.74D-04
 IDIUse=3 WtCom= 9.96D-01 WtEn= 4.18D-03
 Coeff-Com:  0.785D-01 0.921D+00
 Coeff-En:   0.000D+00 0.100D+01
 Coeff:      0.782D-01 0.922D+00
 Gap=     0.166 Goal=   None    Shift=    0.000
 RMSDP=1.07D-04 MaxDP=1.95D-03 DE=-7.59D-04 OVMax= 3.32D-03

 Cycle   3  Pass 1  IDiag  1:
 E= -283.784714910130     Delta-E=        0.000026748208 Rises=F Damp=F
 DIIS: error= 5.28D-04 at cycle   3 NSaved=   3.
 NSaved= 3 IEnMin= 2 EnMin= -283.784741658338     IErMin= 2 ErrMin= 4.18D-04
 ErrMax= 5.28D-04 EMaxC= 1.00D-01 BMatC= 5.98D-05 BMatP= 2.55D-05
 IDIUse=3 WtCom= 3.03D-01 WtEn= 6.97D-01
 Coeff-Com:  0.193D-01 0.603D+00 0.378D+00
 Coeff-En:   0.000D+00 0.659D+00 0.341D+00
 Coeff:      0.586D-02 0.642D+00 0.352D+00
 Gap=     0.165 Goal=   None    Shift=    0.000
 RMSDP=6.47D-05 MaxDP=1.41D-03 DE= 2.67D-05 OVMax= 2.39D-03

 Cycle   4  Pass 1  IDiag  1:
 E= -283.784762688003     Delta-E=       -0.000047777873 Rises=F Damp=F
 DIIS: error= 1.48D-04 at cycle   4 NSaved=   4.
 NSaved= 4 IEnMin= 4 EnMin= -283.784762688003     IErMin= 4 ErrMin= 1.48D-04
 ErrMax= 1.48D-04 EMaxC= 1.00D-01 BMatC= 3.58D-06 BMatP= 2.55D-05
 IDIUse=3 WtCom= 9.99D-01 WtEn= 1.48D-03
 Coeff-Com:  0.971D-03 0.315D+00 0.205D+00 0.479D+00
 Coeff-En:   0.000D+00 0.000D+00 0.000D+00 0.100D+01
 Coeff:      0.969D-03 0.314D+00 0.205D+00 0.480D+00
 Gap=     0.165 Goal=   None    Shift=    0.000
 RMSDP=2.12D-05 MaxDP=5.37D-04 DE=-4.78D-05 OVMax= 8.04D-04

 Cycle   5  Pass 1  IDiag  1:
 E= -283.784765103315     Delta-E=       -0.000002415312 Rises=F Damp=F
 DIIS: error= 7.63D-05 at cycle   5 NSaved=   5.
 NSaved= 5 IEnMin= 5 EnMin= -283.784765103315     IErMin= 5 ErrMin= 7.63D-05
 ErrMax= 7.63D-05 EMaxC= 1.00D-01 BMatC= 7.71D-07 BMatP= 3.58D-06
 IDIUse=1 WtCom= 1.00D+00 WtEn= 0.00D+00
 Coeff-Com: -0.119D-03 0.114D+00 0.671D-01 0.327D+00 0.492D+00
 Coeff:     -0.119D-03 0.114D+00 0.671D-01 0.327D+00 0.492D+00
 Gap=     0.165 Goal=   None    Shift=    0.000
 RMSDP=7.88D-06 MaxDP=1.58D-04 DE=-2.42D-06 OVMax= 2.46D-04

 Cycle   6  Pass 1  IDiag  1:
 E= -283.784765677113     Delta-E=       -0.000000573798 Rises=F Damp=F
 DIIS: error= 2.66D-05 at cycle   6 NSaved=   6.
 NSaved= 6 IEnMin= 6 EnMin= -283.784765677113     IErMin= 6 ErrMin= 2.66D-05
 ErrMax= 2.66D-05 EMaxC= 1.00D-01 BMatC= 1.10D-07 BMatP= 7.71D-07
 IDIUse=1 WtCom= 1.00D+00 WtEn= 0.00D+00
 Coeff-Com: -0.103D-02 0.339D-01 0.136D-01 0.159D+00 0.330D+00 0.465D+00
 Coeff:     -0.103D-02 0.339D-01 0.136D-01 0.159D+00 0.330D+00 0.465D+00
 Gap=     0.165 Goal=   None    Shift=    0.000
 RMSDP=3.11D-06 MaxDP=7.82D-05 DE=-5.74D-07 OVMax= 1.16D-04

 Cycle   7  Pass 1  IDiag  1:
 E= -283.784765751937     Delta-E=       -0.000000074824 Rises=F Damp=F
 DIIS: error= 7.91D-06 at cycle   7 NSaved=   7.
 NSaved= 7 IEnMin= 7 EnMin= -283.784765751937     IErMin= 7 ErrMin= 7.91D-06
 ErrMax= 7.91D-06 EMaxC= 1.00D-01 BMatC= 1.10D-08 BMatP= 1.10D-07
 IDIUse=1 WtCom= 1.00D+00 WtEn= 0.00D+00
 Coeff-Com: -0.125D-03 0.325D-02-0.271D-02 0.517D-01 0.134D+00 0.289D+00
 Coeff-Com:  0.525D+00
 Coeff:     -0.125D-03 0.325D-02-0.271D-02 0.517D-01 0.134D+00 0.289D+00
 Coeff:      0.525D+00
 Gap=     0.165 Goal=   None    Shift=    0.000
 RMSDP=1.44D-06 MaxDP=2.65D-05 DE=-7.48D-08 OVMax= 6.79D-05

 Cycle   8  Pass 1  IDiag  1:
 E= -283.784765760735     Delta-E=       -0.000000008799 Rises=F Damp=F
 DIIS: error= 3.12D-06 at cycle   8 NSaved=   8.
 NSaved= 8 IEnMin= 8 EnMin= -283.784765760735     IErMin= 8 ErrMin= 3.12D-06
 ErrMax= 3.12D-06 EMaxC= 1.00D-01 BMatC= 1.31D-09 BMatP= 1.10D-08
 IDIUse=1 WtCom= 1.00D+00 WtEn= 0.00D+00
 Coeff-Com: -0.604D-04-0.297D-02-0.280D-02 0.345D-02 0.180D-01 0.696D-01
 Coeff-Com:  0.311D+00 0.604D+00
 Coeff:     -0.604D-04-0.297D-02-0.280D-02 0.345D-02 0.180D-01 0.696D-01
 Coeff:      0.311D+00 0.604D+00
 Gap=     0.165 Goal=   None    Shift=    0.000
 RMSDP=4.11D-07 MaxDP=5.44D-06 DE=-8.80D-09 OVMax= 1.49D-05

 Cycle   9  Pass 1  IDiag  1:
 E= -283.784765762061     Delta-E=       -0.000000001326 Rises=F Damp=F
 DIIS: error= 2.72D-07 at cycle   9 NSaved=   9.
 NSaved= 9 IEnMin= 9 EnMin= -283.784765762061     IErMin= 9 ErrMin= 2.72D-07
 ErrMax= 2.72D-07 EMaxC= 1.00D-01 BMatC= 1.98D-11 BMatP= 1.31D-09
 IDIUse=1 WtCom= 1.00D+00 WtEn= 0.00D+00
 Coeff-Com:  0.480D-05-0.883D-03-0.384D-03-0.170D-02-0.170D-02 0.102D-02
 Coeff-Com:  0.652D-01 0.130D+00 0.808D+00
 Coeff:      0.480D-05-0.883D-03-0.384D-03-0.170D-02-0.170D-02 0.102D-02
 Coeff:      0.652D-01 0.130D+00 0.808D+00
 Gap=     0.165 Goal=   None    Shift=    0.000
 RMSDP=6.89D-08 MaxDP=1.07D-06 DE=-1.33D-09 OVMax= 1.35D-06

 Cycle  10  Pass 1  IDiag  1:
 E= -283.784765762079     Delta-E=       -0.000000000018 Rises=F Damp=F
 DIIS: error= 1.52D-07 at cycle  10 NSaved=  10.
 NSaved=10 IEnMin=10 EnMin= -283.784765762079     IErMin=10 ErrMin= 1.52D-07
 ErrMax= 1.52D-07 EMaxC= 1.00D-01 BMatC= 2.33D-12 BMatP= 1.98D-11
 IDIUse=1 WtCom= 1.00D+00 WtEn= 0.00D+00
 Coeff-Com:  0.573D-05-0.252D-03 0.864D-05-0.118D-02-0.230D-02-0.503D-02
 Coeff-Com:  0.878D-02 0.169D-01 0.364D+00 0.619D+00
 Coeff:      0.573D-05-0.252D-03 0.864D-05-0.118D-02-0.230D-02-0.503D-02
 Coeff:      0.878D-02 0.169D-01 0.364D+00 0.619D+00
 Gap=     0.165 Goal=   None    Shift=    0.000
 RMSDP=1.65D-08 MaxDP=4.16D-07 DE=-1.82D-11 OVMax= 4.22D-07

 Cycle  11  Pass 1  IDiag  1:
 E= -283.784765762082     Delta-E=       -0.000000000002 Rises=F Damp=F
 DIIS: error= 4.14D-08 at cycle  11 NSaved=  11.
 NSaved=11 IEnMin=11 EnMin= -283.784765762082     IErMin=11 ErrMin= 4.14D-08
 ErrMax= 4.14D-08 EMaxC= 1.00D-01 BMatC= 1.32D-13 BMatP= 2.33D-12
 IDIUse=1 WtCom= 1.00D+00 WtEn= 0.00D+00
 Coeff-Com:  0.720D-06 0.168D-04 0.443D-04-0.167D-03-0.533D-03-0.168D-02
 Coeff-Com: -0.400D-02-0.713D-02 0.402D-01 0.216D+00 0.757D+00
 Coeff:      0.720D-06 0.168D-04 0.443D-04-0.167D-03-0.533D-03-0.168D-02
 Coeff:     -0.400D-02-0.713D-02 0.402D-01 0.216D+00 0.757D+00
 Gap=     0.165 Goal=   None    Shift=    0.000
 RMSDP=5.76D-09 MaxDP=1.22D-07 DE=-2.39D-12 OVMax= 1.48D-07

 Error on total polarization charges =  0.02607
 SCF Done:  E(RM06L) =  -283.784765762     A.U. after   11 cycles
             Convg  =    0.5757D-08             -V/T =  2.0078
 KE= 2.816015308517D+02 PE=-9.959866036102D+02 EE= 2.705070243685D+02
 SMD-CDS (non-electrostatic) energy       (kcal/mol) =       2.95
 (included in total energy above)
 Leave Link  502 at Thu Apr 27 10:54:12 2023, MaxMem=   33554432 cpu:      76.8
 (Enter /local/share/g09/l801.exe)
 Range of M.O.s used for correlation:     1    95
 NBasis=    95 NAE=    20 NBE=    20 NFC=     0 NFV=     0
 NROrb=     95 NOA=    20 NOB=    20 NVA=    75 NVB=    75
 Leave Link  801 at Thu Apr 27 10:54:12 2023, MaxMem=   33554432 cpu:       0.1
 (Enter /local/share/g09/linda-exe/l1101.exel)
 Leave Link 1101 at Thu Apr 27 10:54:13 2023, MaxMem=   33554432 cpu:       0.1
 (Enter /local/share/g09/l1102.exe)
 Symmetrizing basis deriv contribution to polar:
 IMax=3 JMax=2 DiffMx= 0.00D+00
 Leave Link 1102 at Thu Apr 27 10:54:14 2023, MaxMem=   33554432 cpu:       0.4
 (Enter /local/share/g09/linda-exe/l1110.exel)
 Leave Link 1110 at Thu Apr 27 10:54:15 2023, MaxMem=   33554432 cpu:       0.1
 (Enter /local/share/g09/linda-exe/l1002.exel)
 Minotr:  Closed shell wavefunction.
 Leave Link 1002 at Thu Apr 27 10:54:16 2023, MaxMem=   33554432 cpu:       0.1
 (Enter /local/share/g09/linda-exe/l701.exel)
 Compute integral first derivatives.
 ... and contract with generalized density number  0.
 D1PCM: PCM CHGder 1st derivatives, ID1Alg=3 FixD1E=F DoIter=F DoCFld=F I1PDM=0.
 GePol: Maximum number of non-zero 1st derivatives   =     245
 Leave Link  701 at Thu Apr 27 10:54:26 2023, MaxMem=   33554432 cpu:       8.4
 (Enter /local/share/g09/l702.exe)
 L702 exits ... SP integral derivatives will be done elsewhere.
 Leave Link  702 at Thu Apr 27 10:54:26 2023, MaxMem=   33554432 cpu:       0.1
 (Enter /local/share/g09/linda-exe/l703.exel)
 Compute integral first derivatives, UseDBF=F ICtDFT=           0.
 Integral derivatives from FoFDir, PRISM(SPDF).
 Calling FoFJK, ICntrl=      2547 FMM=F ISym2X=0 I1Cent= 0 IOpClX= 0 NMat=1 NMatS=1 NMatT=0.
 FoFCou: FMM=F IPFlag=           0 FMFlag=      100000 FMFlg1=         800
         NFxFlg=           0 DoJE=F BraDBF=F KetDBF=F FulRan=T
         Omega=  0.000000  0.000000  1.000000  0.000000  0.000000 ICntrl=    2547 IOpCl=  0
         NMat0=    1 NMatS0=    1 NMatT0=    0 NMatD0=    1 NMtDS0=    0 NMtDT0=    0
         I1Cent=           0 NGrid=           0.
 Symmetry not used in FoFCou.
 Leave Link  703 at Thu Apr 27 10:54:31 2023, MaxMem=   33554432 cpu:       3.5
 (Enter /local/share/g09/l716.exe)
 Dipole        =-2.31008279D+00-3.19594002D-01 5.15688726D-03
 Polarizability= 0.00000000D+00 0.00000000D+00 0.00000000D+00
                 0.00000000D+00 0.00000000D+00 0.00000000D+00
 -------------------------------------------------------------------
 Center     Atomic                   Forces (Hartrees/Bohr)
 Number     Number              X              Y              Z
 -------------------------------------------------------------------
      1        6           0.000972821   -0.000773938   -0.000012102
      2        6           0.000122401   -0.000018929    0.000024391
      3        7           0.000079828   -0.000306645   -0.000042018
      4        8          -0.000904949    0.000956698    0.000029688
      5        1          -0.000040421    0.000061250   -0.000026992
      6        1           0.000144455   -0.000000924   -0.000013006
      7        1          -0.000034408    0.000011126    0.000029421
      8        8          -0.000253589    0.000038625    0.000016906
      9        1          -0.000086138    0.000032738   -0.000006287
 -------------------------------------------------------------------
 Cartesian Forces:  Max     0.000972821 RMS     0.000360177
 Z-matrix is all fixed cartesians, so copy forces.
 Leave Link  716 at Thu Apr 27 10:54:31 2023, MaxMem=   33554432 cpu:       0.2
 (Enter /local/share/g09/l123.exe)
 IRC-IRC-IRC-IRC-IRC-IRC-IRC-IRC-IRC-IRC-IRC-IRC-IRC-IRC-IRC-IRC-IRC-IRC
 Pt  1 Step number   1 out of a maximum of  20
 Using modified Bulirsch-Stoer corrector interation.
   Using distance weighted interpolants to fit PES.
    Cycle     1 NS=     2
    Cycle     2 NS=     4 Truncation Error =  0.016718537
    Cycle     3 NS=     6 Truncation Error =  0.004441665
    Cycle     4 NS=     8 Truncation Error =  0.003938119
    Cycle     5 NS=    12 Truncation Error =  0.001777346
    Cycle     6 NS=    16 Truncation Error =  0.001038497
    Cycle     7 NS=    24 Truncation Error =  0.001823212
    Cycle     8 NS=    32 Truncation Error =  0.002415233
    Cycle     9 NS=    48 Truncation Error =  0.002129768
    Cycle    10 NS=    64 Truncation Error =  0.002577200
    Cycle    11 NS=    96 Truncation Error =  0.001327021
    Cycle    12 NS=   128 Truncation Error =  0.005645379
    Cycle    13 NS=   192 Truncation Error =  0.004443260
    Cycle    14 NS=   256 Truncation Error =  0.001104070
    Cycle    15 NS=   384 Truncation Error =  0.000083924
    Cycle    16 NS=   512 Truncation Error =  0.000100035
    Cycle    17 NS=   768 Truncation Error =  0.000022402
    Cycle    18 NS=  1024 Truncation Error =  0.000002888
    Cycle    19 NS=  1536 Truncation Error =  0.000000217
 BS completed in   19 cycles and    5112 integration steps.
 SUMMARY OF CORRECTOR INTEGRATION:
   Original End Point Energy  =  -283.784766
   Corrected End Point Energy =  -283.784766
   Old End-Start Dist.        =     0.321452
   New End-Start Dist.        =     0.321228
   New End-Old End Dist.      =     0.010265
 CORRECTOR INTEGRATION CONVERGENCE:
   Recorrection delta-x convergence threshold:    0.010000
   Delta-x Convergence NOT Met
 IRC-IRC-IRC-IRC-IRC-IRC-IRC-IRC-IRC-IRC-IRC-IRC-IRC-IRC-IRC-IRC-IRC-IRC
 Leave Link  123 at Thu Apr 27 11:07:57 2023, MaxMem=   33554432 cpu:     805.9
 (Enter /local/share/g09/l202.exe)
                          Input orientation:                          
 ---------------------------------------------------------------------
 Center     Atomic      Atomic             Coordinates (Angstroms)
 Number     Number       Type             X           Y           Z
 ---------------------------------------------------------------------
      1          6           0       -0.776869    0.384811   -0.001136
      2          6           0       -1.842886   -0.615523    0.001068
      3          7           0       -0.364518    1.504669   -0.000590
      4          8           0        0.733803   -0.977841   -0.001549
      5          1           0       -1.779326   -1.235435    0.898096
      6          1           0       -2.826231   -0.138016   -0.030180
      7          1           0       -1.743073   -1.279393   -0.860197
      8          8           0        1.864986   -0.049750    0.001564
      9          1           0        1.361685    0.802117    0.001050
 ---------------------------------------------------------------------
                    Distance matrix (angstroms):
                    1          2          3          4          5
     1  C    0.000000
     2  C    1.461870   0.000000
     3  N    1.193363   2.584722   0.000000
     4  O    2.034441   2.602038   2.714620   0.000000
     5  H    2.106830   1.092240   3.212084   2.681703   0.000000
     6  H    2.115202   1.093599   2.959615   3.657864   1.778211
     7  H    2.107394   1.092000   3.223405   2.638773   1.759216
     8  O    2.677358   3.750788   2.717886   1.463194   3.935813
     9  H    2.178890   3.504137   1.863694   1.887457   3.849969
                    6          7          8          9
     6  H    0.000000
     7  H    1.779017   0.000000
     8  O    4.692155   3.908035   0.000000
     9  H    4.292257   3.835877   0.989439   0.000000
 Symmetry turned off by external request.
 Stoichiometry    C2H4NO2(1-)
 Framework group  C1[X(C2H4NO2)]
 Deg. of freedom    21
 Full point group                 C1      NOp   1
 Rotational constants (GHZ):      8.6420059      3.8248405      2.6954868
 Leave Link  202 at Thu Apr 27 11:07:57 2023, MaxMem=   33554432 cpu:       0.2
 (Enter /local/share/g09/l301.exe)
 Standard basis: 6-31G(d,p) (6D, 7F)
 Ernie: Thresh=  0.10000D-02 Tol=  0.10000D-05 Strict=F.
 Integral buffers will be    131072 words long.
 Raffenetti 2 integral format.
 Two-electron integral symmetry is turned off.
    95 basis functions,   168 primitive gaussians,    95 cartesian basis functions
    20 alpha electrons       20 beta electrons
       nuclear repulsion energy       160.0814576038 Hartrees.
 IExCor= 4134 DFT=T Ex+Corr=M06L ExCW=0 ScaHFX=  0.000000
 ScaDFX=  1.000000  1.000000  1.000000  1.000000 ScalE2=  1.000000  1.000000
 IRadAn=      5 IRanWt=     -1 IRanGd=            0 ICorTp=0
 NAtoms=    9 NActive=    9 NUniq=    9 SFac= 1.00D+00 NAtFMM=   50 NAOKFM=F Big=F
 ------------------------------------------------------------------------------
 Polarizable Continuum Model (PCM)
 =================================
 Model                : PCM.
 Atomic radii         : SMD-Coulomb.
 Polarization charges : Total charges.
 Charge compensation  : None.
 Solution method      : Matrix inversion.
 Cavity type          : VdW (van der Waals Surface) (Alpha=1.000).
 Cavity algorithm     : GePol (No added spheres)
                        Default sphere list used, NSphG=    9.
                        Lebedev-Laikov grids with approx.  5.0 points / Ang**2.
                        Smoothing algorithm: Karplus/York (Gamma=1.0000).
                        Polarization charges: spherical gaussians, with
                                              point-specific exponents (IZeta= 3).
                        Self-potential: point-specific (ISelfS= 7).
                        Self-field    : sphere-specific E.n sum rule (ISelfD= 2).
 1st derivatives      : Analytical E(r).r(x)/FMM algorithm (CHGder, D1EAlg=3).
                        Cavity 1st derivative terms included.
 2nd derivatives      : Analytical E(r).r(xy)/FMM algorithm (CHGder, D2EAlg=3).
                        Cavity 2nd derivative terms included.
 Solvent              : Water, Eps=  78.355300 Eps(inf)=   1.777849
 ------------------------------------------------------------------------------
 Spheres list:
 ISph  on   Nord    Re0     Alpha      Xe            Ye            Ze
    1   C      1    1.850   1.000     -0.776869      0.384811     -0.001136
    2   C      2    1.850   1.000     -1.842886     -0.615523      0.001068
    3   N      3    1.890   1.000     -0.364518      1.504669     -0.000590
    4   O      4    1.520   1.000      0.733803     -0.977841     -0.001549
    5   H      5    1.200   1.000     -1.779326     -1.235435      0.898096
    6   H      6    1.200   1.000     -2.826231     -0.138016     -0.030180
    7   H      7    1.200   1.000     -1.743073     -1.279393     -0.860197
    8   O      8    1.520   1.000      1.864986     -0.049750      0.001564
    9   H      9    1.200   1.000      1.361685      0.802117      0.001050
 ------------------------------------------------------------------------------
 GePol: Number of generator spheres                  =       9
 GePol: Total number of spheres                      =       9
 GePol: Number of exposed spheres                    =       9 (100.00%)
 GePol: Number of points                             =     796
 GePol: Average weight of points                     =       0.13
 GePol: Minimum weight of points                     =   0.85D-07
 GePol: Maximum weight of points                     =    0.21991
 GePol: Number of points with low weight             =      26
 GePol: Fraction of low-weight points (<1% of avg)   =       3.27%
 GePol: Cavity surface area                          =    104.622 Ang**2
 GePol: Cavity volume                                =     78.953 Ang**3
 ------------------------------------------------------------------------------
 Atomic radii for non-electrostatic terms: SMD-CDS.
 ------------------------------------------------------------------------------
 PCM non-electrostatic energy =         0.0047060805 Hartrees.
 Nuclear repulsion after PCM non-electrostatic terms =      160.0861636843 Hartrees.
 Leave Link  301 at Thu Apr 27 11:07:58 2023, MaxMem=   33554432 cpu:       0.5
 (Enter /local/share/g09/linda-exe/l302.exel)
 NPDir=0 NMtPBC=     1 NCelOv=     1 NCel=       1 NClECP=     1 NCelD=      1
         NCelK=      1 NCelE2=     1 NClLst=     1 CellRange=     0.0.
 One-electron integrals computed using PRISM.
 NBasis=    95 RedAO= T  NBF=    95
 NBsUse=    95 1.00D-06 NBFU=    95
 Precomputing XC quadrature grid using
 IXCGrd= 2 IRadAn=           5 IRanWt=          -1 IRanGd=           0 AccXCQ= 0.00D+00.
 NRdTot=     735 NPtTot=      197354 NUsed=      202629 NTot=      202661
 NSgBfM=    95    95    95    95    95 NAtAll=     9     9.
 Leave Link  302 at Thu Apr 27 11:08:01 2023, MaxMem=   33554432 cpu:       2.0
 (Enter /local/share/g09/l303.exe)
 DipDrv:  MaxL=1.
 Leave Link  303 at Thu Apr 27 11:08:01 2023, MaxMem=   33554432 cpu:       0.5
 (Enter /local/share/g09/linda-exe/l401.exel)
 Initial guess read from the read-write file.
 B after Tr=     0.000000    0.000000    0.000000
         Rot=    1.000000    0.000000    0.000000    0.000000 Ang=   0.00 deg.
 Guess basis will be translated and rotated to current coordinates.
 Generating alternative initial guess.
 Harris functional with IExCor= 1009 diagonalized for initial guess.
 ExpMin= 1.61D-01 ExpMax= 5.48D+03 ExpMxC= 8.25D+02 IAcc=3 IRadAn=         5 AccDes= 0.00D+00
 HarFok:  IExCor= 1009 AccDes= 0.00D+00 IRadAn=         5 IDoV= 1
 ScaDFX=  1.000000  1.000000  1.000000  1.000000
 FoFCou: FMM=F IPFlag=           0 FMFlag=      100000 FMFlg1=           0
         NFxFlg=           0 DoJE=T BraDBF=F KetDBF=T FulRan=T
         Omega=  0.000000  0.000000  1.000000  0.000000  0.000000 ICntrl=     500 IOpCl=  0
         NMat0=    1 NMatS0=    1 NMatT0=    0 NMatD0=    1 NMtDS0=    0 NMtDT0=    0
         I1Cent=           4 NGrid=           0.
 Symmetry not used in FoFCou.
 Harris En= -283.627002794293    
 Leave Link  401 at Thu Apr 27 11:08:08 2023, MaxMem=   33554432 cpu:       5.8
 (Enter /local/share/g09/linda-exe/l502.exel)
 Closed shell SCF:
 Requested convergence on RMS density matrix=1.00D-08 within 200 cycles.
 Requested convergence on MAX density matrix=1.00D-06.
 Requested convergence on             energy=1.00D-06.
 No special actions if energy rises.
 Using DIIS extrapolation, IDIIS=  1040.
 Two-electron integral symmetry not used.
       202535 words used for storage of precomputed grid.
 Keep J ints in memory in canonical form, NReq=14355645.
 IEnd=      272890 IEndB=      272890 NGot=    33554432 MDV=    22931955
 LenX=    22931955 LenY=    22922489
 Symmetry not used in FoFDir.
 MinBra= 0 MaxBra= 2 Meth= 1.
 IRaf=       0 NMat=   1 IRICut=       1 DoRegI=T DoRafI=F ISym2E= 0 JSym2E=0.

 Cycle   1  Pass 1  IDiag  1:
 E= -283.784765262901    
 DIIS: error= 4.44D-05 at cycle   1 NSaved=   1.
 NSaved= 1 IEnMin= 1 EnMin= -283.784765262901     IErMin= 1 ErrMin= 4.44D-05
 ErrMax= 4.44D-05 EMaxC= 1.00D-01 BMatC= 4.82D-07 BMatP= 4.82D-07
 IDIUse=1 WtCom= 1.00D+00 WtEn= 0.00D+00
 Coeff-Com:  0.100D+01
 Coeff:      0.100D+01
 Gap=     0.165 Goal=   None    Shift=    0.000
 RMSDP=1.53D-05 MaxDP=2.46D-04              OVMax= 4.35D-04

 Cycle   2  Pass 1  IDiag  1:
 E= -283.784766064399     Delta-E=       -0.000000801498 Rises=F Damp=F
 DIIS: error= 1.47D-05 at cycle   2 NSaved=   2.
 NSaved= 2 IEnMin= 2 EnMin= -283.784766064399     IErMin= 2 ErrMin= 1.47D-05
 ErrMax= 1.47D-05 EMaxC= 1.00D-01 BMatC= 2.68D-08 BMatP= 4.82D-07
 IDIUse=1 WtCom= 1.00D+00 WtEn= 0.00D+00
 Coeff-Com:  0.703D-01 0.930D+00
 Coeff:      0.703D-01 0.930D+00
 Gap=     0.165 Goal=   None    Shift=    0.000
 RMSDP=3.87D-06 MaxDP=9.60D-05 DE=-8.01D-07 OVMax= 1.53D-04

 Cycle   3  Pass 1  IDiag  1:
 E= -283.784765997720     Delta-E=        0.000000066679 Rises=F Damp=F
 DIIS: error= 2.82D-05 at cycle   3 NSaved=   3.
 NSaved= 3 IEnMin= 2 EnMin= -283.784766064399     IErMin= 2 ErrMin= 1.47D-05
 ErrMax= 2.82D-05 EMaxC= 1.00D-01 BMatC= 1.00D-07 BMatP= 2.68D-08
 IDIUse=1 WtCom= 1.00D+00 WtEn= 0.00D+00
 Coeff-Com:  0.506D-02 0.666D+00 0.329D+00
 Coeff:      0.506D-02 0.666D+00 0.329D+00
 Gap=     0.165 Goal=   None    Shift=    0.000
 RMSDP=2.83D-06 MaxDP=7.50D-05 DE= 6.67D-08 OVMax= 1.24D-04

 Cycle   4  Pass 1  IDiag  1:
 E= -283.784766085055     Delta-E=       -0.000000087335 Rises=F Damp=F
 DIIS: error= 5.34D-06 at cycle   4 NSaved=   4.
 NSaved= 4 IEnMin= 4 EnMin= -283.784766085055     IErMin= 4 ErrMin= 5.34D-06
 ErrMax= 5.34D-06 EMaxC= 1.00D-01 BMatC= 4.14D-09 BMatP= 2.68D-08
 IDIUse=1 WtCom= 1.00D+00 WtEn= 0.00D+00
 Coeff-Com: -0.929D-03 0.301D+00 0.206D+00 0.494D+00
 Coeff:     -0.929D-03 0.301D+00 0.206D+00 0.494D+00
 Gap=     0.165 Goal=   None    Shift=    0.000
 RMSDP=6.18D-07 MaxDP=1.09D-05 DE=-8.73D-08 OVMax= 2.45D-05

 Cycle   5  Pass 1  IDiag  1:
 E= -283.784766088413     Delta-E=       -0.000000003359 Rises=F Damp=F
 DIIS: error= 1.67D-06 at cycle   5 NSaved=   5.
 NSaved= 5 IEnMin= 5 EnMin= -283.784766088413     IErMin= 5 ErrMin= 1.67D-06
 ErrMax= 1.67D-06 EMaxC= 1.00D-01 BMatC= 4.94D-10 BMatP= 4.14D-09
 IDIUse=1 WtCom= 1.00D+00 WtEn= 0.00D+00
 Coeff-Com: -0.843D-03 0.144D+00 0.111D+00 0.321D+00 0.425D+00
 Coeff:     -0.843D-03 0.144D+00 0.111D+00 0.321D+00 0.425D+00
 Gap=     0.165 Goal=   None    Shift=    0.000
 RMSDP=2.30D-07 MaxDP=5.44D-06 DE=-3.36D-09 OVMax= 9.03D-06

 Cycle   6  Pass 1  IDiag  1:
 E= -283.784766088765     Delta-E=       -0.000000000352 Rises=F Damp=F
 DIIS: error= 6.06D-07 at cycle   6 NSaved=   6.
 NSaved= 6 IEnMin= 6 EnMin= -283.784766088765     IErMin= 6 ErrMin= 6.06D-07
 ErrMax= 6.06D-07 EMaxC= 1.00D-01 BMatC= 6.38D-11 BMatP= 4.94D-10
 IDIUse=1 WtCom= 1.00D+00 WtEn= 0.00D+00
 Coeff-Com: -0.200D-03 0.538D-01 0.457D-01 0.145D+00 0.289D+00 0.467D+00
 Coeff:     -0.200D-03 0.538D-01 0.457D-01 0.145D+00 0.289D+00 0.467D+00
 Gap=     0.165 Goal=   None    Shift=    0.000
 RMSDP=7.09D-08 MaxDP=1.59D-06 DE=-3.52D-10 OVMax= 2.39D-06

 Cycle   7  Pass 1  IDiag  1:
 E= -283.784766088815     Delta-E=       -0.000000000050 Rises=F Damp=F
 DIIS: error= 8.51D-08 at cycle   7 NSaved=   7.
 NSaved= 7 IEnMin= 7 EnMin= -283.784766088815     IErMin= 7 ErrMin= 8.51D-08
 ErrMax= 8.51D-08 EMaxC= 1.00D-01 BMatC= 1.85D-12 BMatP= 6.38D-11
 IDIUse=1 WtCom= 1.00D+00 WtEn= 0.00D+00
 Coeff-Com: -0.294D-04-0.311D-02-0.139D-03 0.339D-02 0.415D-01 0.181D+00
 Coeff-Com:  0.777D+00
 Coeff:     -0.294D-04-0.311D-02-0.139D-03 0.339D-02 0.415D-01 0.181D+00
 Coeff:      0.777D+00
 Gap=     0.165 Goal=   None    Shift=    0.000
 RMSDP=1.47D-08 MaxDP=3.13D-07 DE=-5.02D-11 OVMax= 3.34D-07

 Cycle   8  Pass 1  IDiag  1:
 E= -283.784766088817     Delta-E=       -0.000000000002 Rises=F Damp=F
 DIIS: error= 2.15D-08 at cycle   8 NSaved=   8.
 NSaved= 8 IEnMin= 8 EnMin= -283.784766088817     IErMin= 8 ErrMin= 2.15D-08
 ErrMax= 2.15D-08 EMaxC= 1.00D-01 BMatC= 7.59D-14 BMatP= 1.85D-12
 IDIUse=1 WtCom= 1.00D+00 WtEn= 0.00D+00
 Coeff-Com: -0.159D-04-0.274D-02-0.130D-02-0.253D-02 0.732D-02 0.627D-01
 Coeff-Com:  0.315D+00 0.621D+00
 Coeff:     -0.159D-04-0.274D-02-0.130D-02-0.253D-02 0.732D-02 0.627D-01
 Coeff:      0.315D+00 0.621D+00
 Gap=     0.165 Goal=   None    Shift=    0.000
 RMSDP=4.60D-09 MaxDP=5.31D-08 DE=-2.05D-12 OVMax= 1.41D-07

 Error on total polarization charges =  0.02607
 SCF Done:  E(RM06L) =  -283.784766089     A.U. after    8 cycles
             Convg  =    0.4602D-08             -V/T =  2.0078
 KE= 2.816016438295D+02 PE=-9.959714349678D+02 EE= 2.704988613651D+02
 SMD-CDS (non-electrostatic) energy       (kcal/mol) =       2.95
 (included in total energy above)
 Leave Link  502 at Thu Apr 27 11:09:04 2023, MaxMem=   33554432 cpu:      55.3
 (Enter /local/share/g09/l801.exe)
 Range of M.O.s used for correlation:     1    95
 NBasis=    95 NAE=    20 NBE=    20 NFC=     0 NFV=     0
 NROrb=     95 NOA=    20 NOB=    20 NVA=    75 NVB=    75
 Leave Link  801 at Thu Apr 27 11:09:04 2023, MaxMem=   33554432 cpu:       0.2
 (Enter /local/share/g09/linda-exe/l1101.exel)
 Leave Link 1101 at Thu Apr 27 11:09:05 2023, MaxMem=   33554432 cpu:       0.2
 (Enter /local/share/g09/l1102.exe)
 Symmetrizing basis deriv contribution to polar:
 IMax=3 JMax=2 DiffMx= 0.00D+00
 Leave Link 1102 at Thu Apr 27 11:09:06 2023, MaxMem=   33554432 cpu:       0.4
 (Enter /local/share/g09/linda-exe/l1110.exel)
 Leave Link 1110 at Thu Apr 27 11:09:07 2023, MaxMem=   33554432 cpu:       0.2
 (Enter /local/share/g09/linda-exe/l1002.exel)
 Minotr:  Closed shell wavefunction.
 Leave Link 1002 at Thu Apr 27 11:09:08 2023, MaxMem=   33554432 cpu:       0.2
 (Enter /local/share/g09/linda-exe/l701.exel)
 Compute integral first derivatives.
 ... and contract with generalized density number  0.
 D1PCM: PCM CHGder 1st derivatives, ID1Alg=3 FixD1E=F DoIter=F DoCFld=F I1PDM=0.
 GePol: Maximum number of non-zero 1st derivatives   =     244
 Leave Link  701 at Thu Apr 27 11:09:17 2023, MaxMem=   33554432 cpu:       8.4
 (Enter /local/share/g09/l702.exe)
 L702 exits ... SP integral derivatives will be done elsewhere.
 Leave Link  702 at Thu Apr 27 11:09:17 2023, MaxMem=   33554432 cpu:       0.2
 (Enter /local/share/g09/linda-exe/l703.exel)
 Compute integral first derivatives, UseDBF=F ICtDFT=           0.
 Integral derivatives from FoFDir, PRISM(SPDF).
 Calling FoFJK, ICntrl=      2547 FMM=F ISym2X=0 I1Cent= 0 IOpClX= 0 NMat=1 NMatS=1 NMatT=0.
 FoFCou: FMM=F IPFlag=           0 FMFlag=      100000 FMFlg1=         800
         NFxFlg=           0 DoJE=F BraDBF=F KetDBF=F FulRan=T
         Omega=  0.000000  0.000000  1.000000  0.000000  0.000000 ICntrl=    2547 IOpCl=  0
         NMat0=    1 NMatS0=    1 NMatT0=    0 NMatD0=    1 NMtDS0=    0 NMtDT0=    0
         I1Cent=           0 NGrid=           0.
 Symmetry not used in FoFCou.
 Leave Link  703 at Thu Apr 27 11:09:22 2023, MaxMem=   33554432 cpu:       3.8
 (Enter /local/share/g09/l716.exe)
 Dipole        =-2.30881077D+00-3.20730212D-01 4.96821043D-03
 Polarizability= 0.00000000D+00 0.00000000D+00 0.00000000D+00
                 0.00000000D+00 0.00000000D+00 0.00000000D+00
 -------------------------------------------------------------------
 Center     Atomic                   Forces (Hartrees/Bohr)
 Number     Number              X              Y              Z
 -------------------------------------------------------------------
      1        6           0.000961514   -0.000677469   -0.000015033
      2        6           0.000177527   -0.000067838    0.000014783
      3        7           0.000184419   -0.000369106   -0.000045120
      4        8          -0.000910649    0.000947216    0.000025126
      5        1          -0.000035196    0.000004018    0.000008540
      6        1           0.000047451    0.000049235   -0.000016921
      7        1          -0.000019448   -0.000025692    0.000015383
      8        8          -0.000397511    0.000109454    0.000015281
      9        1          -0.000008107    0.000030182   -0.000002039
 -------------------------------------------------------------------
 Cartesian Forces:  Max     0.000961514 RMS     0.000359950
 Z-matrix is all fixed cartesians, so copy forces.
 Leave Link  716 at Thu Apr 27 11:09:22 2023, MaxMem=   33554432 cpu:       0.2
 (Enter /local/share/g09/l123.exe)
 IRC-IRC-IRC-IRC-IRC-IRC-IRC-IRC-IRC-IRC-IRC-IRC-IRC-IRC-IRC-IRC-IRC-IRC
 Error in corrector energy =           0.0000000161
 Magnitude of corrector gradient =     0.0018724311
 Magnitude of analytic gradient =      0.0018703549
 Magnitude of difference =             0.0000564826
 Angle between gradients (degrees)=    1.7282
 Pt  1 Step number   2 out of a maximum of  20
 Using modified Bulirsch-Stoer corrector interation.
   Using distance weighted interpolants to fit PES.
    Cycle     1 NS=     2
    Cycle     2 NS=     4 Truncation Error =  0.016227612
    Cycle     3 NS=     6 Truncation Error =  0.004626115
    Cycle     4 NS=     8 Truncation Error =  0.002644036
    Cycle     5 NS=    12 Truncation Error =  0.003619384
    Cycle     6 NS=    16 Truncation Error =  0.002048934
    Cycle     7 NS=    24 Truncation Error =  0.002564664
    Cycle     8 NS=    32 Truncation Error =  0.003000957
    Cycle     9 NS=    48 Truncation Error =  0.002797345
    Cycle    10 NS=    64 Truncation Error =  0.002150301
    Cycle    11 NS=    96 Truncation Error =  0.007569691
    Cycle    12 NS=   128 Truncation Error =  0.002882358
    Cycle    13 NS=   192 Truncation Error =  0.000866594
    Cycle    14 NS=   256 Truncation Error =  0.000783787
    Cycle    15 NS=   384 Truncation Error =  0.000174478
    Cycle    16 NS=   512 Truncation Error =  0.000013187
    Cycle    17 NS=   768 Truncation Error =  0.000001476
    Cycle    18 NS=  1024 Truncation Error =  0.000000422
 BS completed in   18 cycles and    3576 integration steps.
 SUMMARY OF CORRECTOR INTEGRATION:
   Original End Point Energy  =  -283.784766
   Corrected End Point Energy =  -283.784766
   Old End-Start Dist.        =     0.321228
   New End-Start Dist.        =     0.321046
   New End-Old End Dist.      =     0.001674
 CORRECTOR INTEGRATION CONVERGENCE:
   Recorrection delta-x convergence threshold:    0.010000
   Delta-x Convergence Met
 Point Number:   1          Path Number:   1
                    CURRENT STRUCTURE
                Cartesian Coordinates (Ang):                
 ---------------------------------------------------------------------
 Center     Atomic                     Coordinates (Angstroms)
 Number     Number                        X           Y           Z
 ---------------------------------------------------------------------
      1          6                   -0.776881    0.384801   -0.001159
      2          6                   -1.842933   -0.615491    0.001098
      3          7                   -0.364543    1.504640   -0.000661
      4          8                    0.733851   -0.977857   -0.001520
      5          1                   -1.779656   -1.235112    0.898347
      6          1                   -2.826219   -0.137892   -0.030529
      7          1                   -1.742991   -1.279637   -0.859934
      8          8                    1.865019   -0.049737    0.001583
      9          1                    1.361706    0.802126    0.001022
 ---------------------------------------------------------------------
   CHANGE IN THE REACTION COORDINATE =    0.32105
   NET REACTION COORDINATE UP TO THIS POINT =    0.32105
  # OF POINTS ALONG THE PATH =   1
  # OF STEPS =   2

 Calculating another point on the path.
 Point Number  2 in REVERSE path direction.
 Using LQA Reaction Path Following.
   LQA: T_Est iteration completed in    2 iterations.
 IRC-IRC-IRC-IRC-IRC-IRC-IRC-IRC-IRC-IRC-IRC-IRC-IRC-IRC-IRC-IRC-IRC-IRC
 Leave Link  123 at Thu Apr 27 11:18:47 2023, MaxMem=   33554432 cpu:     564.6
 (Enter /local/share/g09/l202.exe)
                          Input orientation:                          
 ---------------------------------------------------------------------
 Center     Atomic      Atomic             Coordinates (Angstroms)
 Number     Number       Type             X           Y           Z
 ---------------------------------------------------------------------
      1          6           0       -0.750482    0.365052   -0.001642
      2          6           0       -1.837887   -0.617377    0.001526
      3          7           0       -0.359436    1.496610   -0.001720
      4          8           0        0.714729   -0.958053   -0.000998
      5          1           0       -1.790894   -1.234728    0.902002
      6          1           0       -2.812341   -0.122011   -0.035930
      7          1           0       -1.748336   -1.288725   -0.855564
      8          8           0        1.856415   -0.047284    0.001905
      9          1           0        1.359081    0.810891    0.000386
 ---------------------------------------------------------------------
                    Distance matrix (angstroms):
                    1          2          3          4          5
     1  C    0.000000
     2  C    1.465478   0.000000
     3  N    1.197222   2.579683   0.000000
     4  O    1.974195   2.575250   2.679403   0.000000
     5  H    2.111474   1.092790   3.213408   2.677704   0.000000
     6  H    2.118883   1.093778   2.939021   3.624969   1.777979
     7  H    2.111841   1.092396   3.227411   2.627986   1.758910
     8  O    2.639307   3.738030   2.700670   1.460464   3.939931
     9  H    2.156161   3.501507   1.850275   1.882645   3.862617
                    6          7          8          9
     6  H    0.000000
     7  H    1.779080   0.000000
     8  O    4.669506   3.907768   0.000000
     9  H    4.274621   3.846696   0.991870   0.000000
 Symmetry turned off by external request.
 Stoichiometry    C2H4NO2(1-)
 Framework group  C1[X(C2H4NO2)]
 Deg. of freedom    21
 Full point group                 C1      NOp   1
 Rotational constants (GHZ):      8.7857337      3.8791966      2.7364565
 Leave Link  202 at Thu Apr 27 11:18:47 2023, MaxMem=   33554432 cpu:       0.2
 (Enter /local/share/g09/l301.exe)
 Standard basis: 6-31G(d,p) (6D, 7F)
 Ernie: Thresh=  0.10000D-02 Tol=  0.10000D-05 Strict=F.
 Integral buffers will be    131072 words long.
 Raffenetti 2 integral format.
 Two-electron integral symmetry is turned off.
    95 basis functions,   168 primitive gaussians,    95 cartesian basis functions
    20 alpha electrons       20 beta electrons
       nuclear repulsion energy       160.9478392880 Hartrees.
 IExCor= 4134 DFT=T Ex+Corr=M06L ExCW=0 ScaHFX=  0.000000
 ScaDFX=  1.000000  1.000000  1.000000  1.000000 ScalE2=  1.000000  1.000000
 IRadAn=      5 IRanWt=     -1 IRanGd=            0 ICorTp=0
 NAtoms=    9 NActive=    9 NUniq=    9 SFac= 1.00D+00 NAtFMM=   50 NAOKFM=F Big=F
 ------------------------------------------------------------------------------
 Polarizable Continuum Model (PCM)
 =================================
 Model                : PCM.
 Atomic radii         : SMD-Coulomb.
 Polarization charges : Total charges.
 Charge compensation  : None.
 Solution method      : Matrix inversion.
 Cavity type          : VdW (van der Waals Surface) (Alpha=1.000).
 Cavity algorithm     : GePol (No added spheres)
                        Default sphere list used, NSphG=    9.
                        Lebedev-Laikov grids with approx.  5.0 points / Ang**2.
                        Smoothing algorithm: Karplus/York (Gamma=1.0000).
                        Polarization charges: spherical gaussians, with
                                              point-specific exponents (IZeta= 3).
                        Self-potential: point-specific (ISelfS= 7).
                        Self-field    : sphere-specific E.n sum rule (ISelfD= 2).
 1st derivatives      : Analytical E(r).r(x)/FMM algorithm (CHGder, D1EAlg=3).
                        Cavity 1st derivative terms included.
 2nd derivatives      : Analytical E(r).r(xy)/FMM algorithm (CHGder, D2EAlg=3).
                        Cavity 2nd derivative terms included.
 Solvent              : Water, Eps=  78.355300 Eps(inf)=   1.777849
 ------------------------------------------------------------------------------
 Spheres list:
 ISph  on   Nord    Re0     Alpha      Xe            Ye            Ze
    1   C      1    1.850   1.000     -0.750482      0.365052     -0.001642
    2   C      2    1.850   1.000     -1.837887     -0.617377      0.001526
    3   N      3    1.890   1.000     -0.359436      1.496610     -0.001720
    4   O      4    1.520   1.000      0.714729     -0.958053     -0.000998
    5   H      5    1.200   1.000     -1.790894     -1.234728      0.902002
    6   H      6    1.200   1.000     -2.812341     -0.122011     -0.035930
    7   H      7    1.200   1.000     -1.748336     -1.288725     -0.855564
    8   O      8    1.520   1.000      1.856415     -0.047284      0.001905
    9   H      9    1.200   1.000      1.359081      0.810891      0.000386
 ------------------------------------------------------------------------------
 GePol: Number of generator spheres                  =       9
 GePol: Total number of spheres                      =       9
 GePol: Number of exposed spheres                    =       9 (100.00%)
 GePol: Number of points                             =     796
 GePol: Average weight of points                     =       0.13
 GePol: Minimum weight of points                     =   0.68D-06
 GePol: Maximum weight of points                     =    0.21991
 GePol: Number of points with low weight             =      23
 GePol: Fraction of low-weight points (<1% of avg)   =       2.89%
 GePol: Cavity surface area                          =    104.096 Ang**2
 GePol: Cavity volume                                =     78.608 Ang**3
 ------------------------------------------------------------------------------
 Atomic radii for non-electrostatic terms: SMD-CDS.
 ------------------------------------------------------------------------------
 PCM non-electrostatic energy =         0.0044391788 Hartrees.
 Nuclear repulsion after PCM non-electrostatic terms =      160.9522784669 Hartrees.
 Leave Link  301 at Thu Apr 27 11:18:48 2023, MaxMem=   33554432 cpu:       0.5
 (Enter /local/share/g09/linda-exe/l302.exel)
 NPDir=0 NMtPBC=     1 NCelOv=     1 NCel=       1 NClECP=     1 NCelD=      1
         NCelK=      1 NCelE2=     1 NClLst=     1 CellRange=     0.0.
 One-electron integrals computed using PRISM.
 NBasis=    95 RedAO= T  NBF=    95
 NBsUse=    95 1.00D-06 NBFU=    95
 Precomputing XC quadrature grid using
 IXCGrd= 2 IRadAn=           5 IRanWt=          -1 IRanGd=           0 AccXCQ= 0.00D+00.
 NRdTot=     735 NPtTot=      197354 NUsed=      202629 NTot=      202661
 NSgBfM=    95    95    95    95    95 NAtAll=     9     9.
 Leave Link  302 at Thu Apr 27 11:18:51 2023, MaxMem=   33554432 cpu:       2.0
 (Enter /local/share/g09/l303.exe)
 DipDrv:  MaxL=1.
 Leave Link  303 at Thu Apr 27 11:18:51 2023, MaxMem=   33554432 cpu:       0.5
 (Enter /local/share/g09/linda-exe/l401.exel)
 Initial guess read from the read-write file.
 B after Tr=     0.000000    0.000000    0.000000
         Rot=    1.000000    0.000000    0.000000    0.000000 Ang=   0.00 deg.
 Guess basis will be translated and rotated to current coordinates.
 Generating alternative initial guess.
 Harris functional with IExCor= 1009 diagonalized for initial guess.
 ExpMin= 1.61D-01 ExpMax= 5.48D+03 ExpMxC= 8.25D+02 IAcc=3 IRadAn=         5 AccDes= 0.00D+00
 HarFok:  IExCor= 1009 AccDes= 0.00D+00 IRadAn=         5 IDoV= 1
 ScaDFX=  1.000000  1.000000  1.000000  1.000000
 FoFCou: FMM=F IPFlag=           0 FMFlag=      100000 FMFlg1=           0
         NFxFlg=           0 DoJE=T BraDBF=F KetDBF=T FulRan=T
         Omega=  0.000000  0.000000  1.000000  0.000000  0.000000 ICntrl=     500 IOpCl=  0
         NMat0=    1 NMatS0=    1 NMatT0=    0 NMatD0=    1 NMtDS0=    0 NMtDT0=    0
         I1Cent=           4 NGrid=           0.
 Symmetry not used in FoFCou.
 Harris En= -283.627559398185    
 Leave Link  401 at Thu Apr 27 11:18:58 2023, MaxMem=   33554432 cpu:       5.8
 (Enter /local/share/g09/linda-exe/l502.exel)
 Closed shell SCF:
 Requested convergence on RMS density matrix=1.00D-08 within 200 cycles.
 Requested convergence on MAX density matrix=1.00D-06.
 Requested convergence on             energy=1.00D-06.
 No special actions if energy rises.
 Using DIIS extrapolation, IDIIS=  1040.
 Two-electron integral symmetry not used.
       202535 words used for storage of precomputed grid.
 Keep J ints in memory in canonical form, NReq=14355905.
 IEnd=      272890 IEndB=      272890 NGot=    33554432 MDV=    22931955
 LenX=    22931955 LenY=    22922489
 Symmetry not used in FoFDir.
 MinBra= 0 MaxBra= 2 Meth= 1.
 IRaf=       0 NMat=   1 IRICut=       1 DoRegI=T DoRafI=F ISym2E= 0 JSym2E=0.

 Cycle   1  Pass 1  IDiag  1:
 E= -283.784095683056    
 DIIS: error= 1.35D-03 at cycle   1 NSaved=   1.
 NSaved= 1 IEnMin= 1 EnMin= -283.784095683056     IErMin= 1 ErrMin= 1.35D-03
 ErrMax= 1.35D-03 EMaxC= 1.00D-01 BMatC= 4.26D-04 BMatP= 4.26D-04
 IDIUse=3 WtCom= 9.86D-01 WtEn= 1.35D-02
 Coeff-Com:  0.100D+01
 Coeff-En:   0.100D+01
 Coeff:      0.100D+01
 Gap=     0.171 Goal=   None    Shift=    0.000
 GapD=    0.171 DampG=1.000 DampE=1.000 DampFc=1.0000 IDamp=-1.
 RMSDP=4.99D-04 MaxDP=6.39D-03              OVMax= 1.99D-02

 Cycle   2  Pass 1  IDiag  1:
 E= -283.784959681614     Delta-E=       -0.000863998557 Rises=F Damp=F
 DIIS: error= 4.24D-04 at cycle   2 NSaved=   2.
 NSaved= 2 IEnMin= 2 EnMin= -283.784959681614     IErMin= 2 ErrMin= 4.24D-04
 ErrMax= 4.24D-04 EMaxC= 1.00D-01 BMatC= 2.65D-05 BMatP= 4.26D-04
 IDIUse=3 WtCom= 9.96D-01 WtEn= 4.24D-03
 Coeff-Com:  0.739D-01 0.926D+00
 Coeff-En:   0.000D+00 0.100D+01
 Coeff:      0.736D-01 0.926D+00
 Gap=     0.172 Goal=   None    Shift=    0.000
 RMSDP=9.98D-05 MaxDP=2.10D-03 DE=-8.64D-04 OVMax= 2.42D-03

 Cycle   3  Pass 1  IDiag  1:
 E= -283.784942601945     Delta-E=        0.000017079669 Rises=F Damp=F
 DIIS: error= 5.34D-04 at cycle   3 NSaved=   3.
 NSaved= 3 IEnMin= 2 EnMin= -283.784959681614     IErMin= 2 ErrMin= 4.24D-04
 ErrMax= 5.34D-04 EMaxC= 1.00D-01 BMatC= 5.08D-05 BMatP= 2.65D-05
 IDIUse=3 WtCom= 3.02D-01 WtEn= 6.98D-01
 Coeff-Com:  0.135D-01 0.581D+00 0.405D+00
 Coeff-En:   0.000D+00 0.619D+00 0.381D+00
 Coeff:      0.409D-02 0.608D+00 0.388D+00
 Gap=     0.171 Goal=   None    Shift=    0.000
 RMSDP=5.87D-05 MaxDP=1.18D-03 DE= 1.71D-05 OVMax= 1.99D-03

 Cycle   4  Pass 1  IDiag  1:
 E= -283.784981011111     Delta-E=       -0.000038409166 Rises=F Damp=F
 DIIS: error= 1.53D-04 at cycle   4 NSaved=   4.
 NSaved= 4 IEnMin= 4 EnMin= -283.784981011111     IErMin= 4 ErrMin= 1.53D-04
 ErrMax= 1.53D-04 EMaxC= 1.00D-01 BMatC= 3.47D-06 BMatP= 2.65D-05
 IDIUse=3 WtCom= 9.98D-01 WtEn= 1.53D-03
 Coeff-Com: -0.429D-03 0.287D+00 0.228D+00 0.486D+00
 Coeff-En:   0.000D+00 0.000D+00 0.000D+00 0.100D+01
 Coeff:     -0.428D-03 0.286D+00 0.228D+00 0.486D+00
 Gap=     0.171 Goal=   None    Shift=    0.000
 RMSDP=2.15D-05 MaxDP=5.86D-04 DE=-3.84D-05 OVMax= 8.93D-04

 Cycle   5  Pass 1  IDiag  1:
 E= -283.784983413599     Delta-E=       -0.000002402487 Rises=F Damp=F
 DIIS: error= 6.72D-05 at cycle   5 NSaved=   5.
 NSaved= 5 IEnMin= 5 EnMin= -283.784983413599     IErMin= 5 ErrMin= 6.72D-05
 ErrMax= 6.72D-05 EMaxC= 1.00D-01 BMatC= 7.25D-07 BMatP= 3.47D-06
 IDIUse=1 WtCom= 1.00D+00 WtEn= 0.00D+00
 Coeff-Com: -0.577D-03 0.946D-01 0.770D-01 0.327D+00 0.502D+00
 Coeff:     -0.577D-03 0.946D-01 0.770D-01 0.327D+00 0.502D+00
 Gap=     0.171 Goal=   None    Shift=    0.000
 RMSDP=8.19D-06 MaxDP=1.73D-04 DE=-2.40D-06 OVMax= 3.19D-04

 Cycle   6  Pass 1  IDiag  1:
 E= -283.784983941321     Delta-E=       -0.000000527723 Rises=F Damp=F
 DIIS: error= 3.41D-05 at cycle   6 NSaved=   6.
 NSaved= 6 IEnMin= 6 EnMin= -283.784983941321     IErMin= 6 ErrMin= 3.41D-05
 ErrMax= 3.41D-05 EMaxC= 1.00D-01 BMatC= 1.38D-07 BMatP= 7.25D-07
 IDIUse=1 WtCom= 1.00D+00 WtEn= 0.00D+00
 Coeff-Com: -0.126D-02 0.260D-01 0.193D-01 0.164D+00 0.352D+00 0.440D+00
 Coeff:     -0.126D-02 0.260D-01 0.193D-01 0.164D+00 0.352D+00 0.440D+00
 Gap=     0.171 Goal=   None    Shift=    0.000
 RMSDP=3.42D-06 MaxDP=8.18D-05 DE=-5.28D-07 OVMax= 1.25D-04

 Cycle   7  Pass 1  IDiag  1:
 E= -283.784984039419     Delta-E=       -0.000000098098 Rises=F Damp=F
 DIIS: error= 8.20D-06 at cycle   7 NSaved=   7.
 NSaved= 7 IEnMin= 7 EnMin= -283.784984039419     IErMin= 7 ErrMin= 8.20D-06
 ErrMax= 8.20D-06 EMaxC= 1.00D-01 BMatC= 1.37D-08 BMatP= 1.38D-07
 IDIUse=1 WtCom= 1.00D+00 WtEn= 0.00D+00
 Coeff-Com: -0.152D-03-0.562D-04-0.136D-02 0.526D-01 0.146D+00 0.281D+00
 Coeff-Com:  0.522D+00
 Coeff:     -0.152D-03-0.562D-04-0.136D-02 0.526D-01 0.146D+00 0.281D+00
 Coeff:      0.522D+00
 Gap=     0.171 Goal=   None    Shift=    0.000
 RMSDP=1.60D-06 MaxDP=3.10D-05 DE=-9.81D-08 OVMax= 7.56D-05

 Cycle   8  Pass 1  IDiag  1:
 E= -283.784984049674     Delta-E=       -0.000000010255 Rises=F Damp=F
 DIIS: error= 4.18D-06 at cycle   8 NSaved=   8.
 NSaved= 8 IEnMin= 8 EnMin= -283.784984049674     IErMin= 8 ErrMin= 4.18D-06
 ErrMax= 4.18D-06 EMaxC= 1.00D-01 BMatC= 2.03D-09 BMatP= 1.37D-08
 IDIUse=1 WtCom= 1.00D+00 WtEn= 0.00D+00
 Coeff-Com: -0.622D-04-0.350D-02-0.291D-02 0.385D-02 0.222D-01 0.747D-01
 Coeff-Com:  0.332D+00 0.573D+00
 Coeff:     -0.622D-04-0.350D-02-0.291D-02 0.385D-02 0.222D-01 0.747D-01
 Coeff:      0.332D+00 0.573D+00
 Gap=     0.171 Goal=   None    Shift=    0.000
 RMSDP=4.94D-07 MaxDP=6.40D-06 DE=-1.03D-08 OVMax= 1.85D-05

 Cycle   9  Pass 1  IDiag  1:
 E= -283.784984051675     Delta-E=       -0.000000002000 Rises=F Damp=F
 DIIS: error= 3.05D-07 at cycle   9 NSaved=   9.
 NSaved= 9 IEnMin= 9 EnMin= -283.784984051675     IErMin= 9 ErrMin= 3.05D-07
 ErrMax= 3.05D-07 EMaxC= 1.00D-01 BMatC= 2.35D-11 BMatP= 2.03D-09
 IDIUse=1 WtCom= 1.00D+00 WtEn= 0.00D+00
 Coeff-Com:  0.666D-05-0.827D-03-0.470D-03-0.163D-02-0.158D-02 0.180D-02
 Coeff-Com:  0.687D-01 0.111D+00 0.823D+00
 Coeff:      0.666D-05-0.827D-03-0.470D-03-0.163D-02-0.158D-02 0.180D-02
 Coeff:      0.687D-01 0.111D+00 0.823D+00
 Gap=     0.171 Goal=   None    Shift=    0.000
 RMSDP=7.37D-08 MaxDP=1.10D-06 DE=-2.00D-09 OVMax= 1.64D-06

 Cycle  10  Pass 1  IDiag  1:
 E= -283.784984051697     Delta-E=       -0.000000000022 Rises=F Damp=F
 DIIS: error= 1.48D-07 at cycle  10 NSaved=  10.
 NSaved=10 IEnMin=10 EnMin= -283.784984051697     IErMin=10 ErrMin= 1.48D-07
 ErrMax= 1.48D-07 EMaxC= 1.00D-01 BMatC= 2.36D-12 BMatP= 2.35D-11
 IDIUse=1 WtCom= 1.00D+00 WtEn= 0.00D+00
 Coeff-Com:  0.624D-05-0.198D-03-0.507D-04-0.110D-02-0.235D-02-0.431D-02
 Coeff-Com:  0.109D-01 0.140D-01 0.365D+00 0.618D+00
 Coeff:      0.624D-05-0.198D-03-0.507D-04-0.110D-02-0.235D-02-0.431D-02
 Coeff:      0.109D-01 0.140D-01 0.365D+00 0.618D+00
 Gap=     0.171 Goal=   None    Shift=    0.000
 RMSDP=1.67D-08 MaxDP=4.31D-07 DE=-2.16D-11 OVMax= 4.37D-07

 Cycle  11  Pass 1  IDiag  1:
 E= -283.784984051699     Delta-E=       -0.000000000002 Rises=F Damp=F
 DIIS: error= 4.52D-08 at cycle  11 NSaved=  11.
 NSaved=11 IEnMin=11 EnMin= -283.784984051699     IErMin=11 ErrMin= 4.52D-08
 ErrMax= 4.52D-08 EMaxC= 1.00D-01 BMatC= 1.66D-13 BMatP= 2.36D-12
 IDIUse=1 WtCom= 1.00D+00 WtEn= 0.00D+00
 Coeff-Com:  0.681D-06 0.276D-04 0.359D-04-0.151D-03-0.591D-03-0.154D-02
 Coeff-Com: -0.389D-02-0.624D-02 0.396D-01 0.223D+00 0.750D+00
 Coeff:      0.681D-06 0.276D-04 0.359D-04-0.151D-03-0.591D-03-0.154D-02
 Coeff:     -0.389D-02-0.624D-02 0.396D-01 0.223D+00 0.750D+00
 Gap=     0.171 Goal=   None    Shift=    0.000
 RMSDP=6.19D-09 MaxDP=1.28D-07 DE=-2.16D-12 OVMax= 1.57D-07

 Error on total polarization charges =  0.02615
 SCF Done:  E(RM06L) =  -283.784984052     A.U. after   11 cycles
             Convg  =    0.6189D-08             -V/T =  2.0078
 KE= 2.815972550046D+02 PE=-9.976776503454D+02 EE= 2.713431328222D+02
 SMD-CDS (non-electrostatic) energy       (kcal/mol) =       2.79
 (included in total energy above)
 Leave Link  502 at Thu Apr 27 11:20:12 2023, MaxMem=   33554432 cpu:      73.4
 (Enter /local/share/g09/l801.exe)
 Range of M.O.s used for correlation:     1    95
 NBasis=    95 NAE=    20 NBE=    20 NFC=     0 NFV=     0
 NROrb=     95 NOA=    20 NOB=    20 NVA=    75 NVB=    75
 Leave Link  801 at Thu Apr 27 11:20:12 2023, MaxMem=   33554432 cpu:       0.2
 (Enter /local/share/g09/linda-exe/l1101.exel)
 Leave Link 1101 at Thu Apr 27 11:20:13 2023, MaxMem=   33554432 cpu:       0.1
 (Enter /local/share/g09/l1102.exe)
 Symmetrizing basis deriv contribution to polar:
 IMax=3 JMax=2 DiffMx= 0.00D+00
 Leave Link 1102 at Thu Apr 27 11:20:14 2023, MaxMem=   33554432 cpu:       0.4
 (Enter /local/share/g09/linda-exe/l1110.exel)
 Leave Link 1110 at Thu Apr 27 11:20:15 2023, MaxMem=   33554432 cpu:       0.1
 (Enter /local/share/g09/linda-exe/l1002.exel)
 Minotr:  Closed shell wavefunction.
 Leave Link 1002 at Thu Apr 27 11:20:16 2023, MaxMem=   33554432 cpu:       0.2
 (Enter /local/share/g09/linda-exe/l701.exel)
 Compute integral first derivatives.
 ... and contract with generalized density number  0.
 D1PCM: PCM CHGder 1st derivatives, ID1Alg=3 FixD1E=F DoIter=F DoCFld=F I1PDM=0.
 GePol: Maximum number of non-zero 1st derivatives   =     245
 Leave Link  701 at Thu Apr 27 11:20:24 2023, MaxMem=   33554432 cpu:       7.9
 (Enter /local/share/g09/l702.exe)
 L702 exits ... SP integral derivatives will be done elsewhere.
 Leave Link  702 at Thu Apr 27 11:20:25 2023, MaxMem=   33554432 cpu:       0.2
 (Enter /local/share/g09/linda-exe/l703.exel)
 Compute integral first derivatives, UseDBF=F ICtDFT=           0.
 Integral derivatives from FoFDir, PRISM(SPDF).
 Calling FoFJK, ICntrl=      2547 FMM=F ISym2X=0 I1Cent= 0 IOpClX= 0 NMat=1 NMatS=1 NMatT=0.
 FoFCou: FMM=F IPFlag=           0 FMFlag=      100000 FMFlg1=         800
         NFxFlg=           0 DoJE=F BraDBF=F KetDBF=F FulRan=T
         Omega=  0.000000  0.000000  1.000000  0.000000  0.000000 ICntrl=    2547 IOpCl=  0
         NMat0=    1 NMatS0=    1 NMatT0=    0 NMatD0=    1 NMtDS0=    0 NMtDT0=    0
         I1Cent=           0 NGrid=           0.
 Symmetry not used in FoFCou.
 Leave Link  703 at Thu Apr 27 11:20:29 2023, MaxMem=   33554432 cpu:       3.4
 (Enter /local/share/g09/l716.exe)
 Dipole        =-2.17346833D+00-4.21056181D-01 5.63589497D-03
 Polarizability= 0.00000000D+00 0.00000000D+00 0.00000000D+00
                 0.00000000D+00 0.00000000D+00 0.00000000D+00
 -------------------------------------------------------------------
 Center     Atomic                   Forces (Hartrees/Bohr)
 Number     Number              X              Y              Z
 -------------------------------------------------------------------
      1        6           0.001427107   -0.000965930    0.000006348
      2        6           0.000276792   -0.000035139    0.000062572
      3        7           0.000333123   -0.000845830   -0.000051219
      4        8          -0.001344758    0.001579891    0.000008353
      5        1          -0.000064229    0.000089707   -0.000092224
      6        1           0.000340577   -0.000043627   -0.000020871
      7        1          -0.000071801    0.000002056    0.000062894
      8        8          -0.000717285    0.000074955    0.000021427
      9        1          -0.000179525    0.000143918    0.000002720
 -------------------------------------------------------------------
 Cartesian Forces:  Max     0.001579891 RMS     0.000574348
 Z-matrix is all fixed cartesians, so copy forces.
 Leave Link  716 at Thu Apr 27 11:20:29 2023, MaxMem=   33554432 cpu:       0.2
 (Enter /local/share/g09/l123.exe)
 IRC-IRC-IRC-IRC-IRC-IRC-IRC-IRC-IRC-IRC-IRC-IRC-IRC-IRC-IRC-IRC-IRC-IRC
 Pt  2 Step number   1 out of a maximum of  20
 Using modified Bulirsch-Stoer corrector interation.
   Using distance weighted interpolants to fit PES.
    Cycle     1 NS=     2
    Cycle     2 NS=     4 Truncation Error =  0.061909106
    Cycle     3 NS=     6 Truncation Error =  0.008424181
    Cycle     4 NS=     8 Truncation Error =  0.005568119
    Cycle     5 NS=    12 Truncation Error =  0.011075576
    Cycle     6 NS=    16 Truncation Error =  0.006751848
    Cycle     7 NS=    24 Truncation Error =  0.003782847
    Cycle     8 NS=    32 Truncation Error =  0.008764806
    Cycle     9 NS=    48 Truncation Error =  0.002700177
    Cycle    10 NS=    64 Truncation Error =  0.007949696
    Cycle    11 NS=    96 Truncation Error =  0.000946825
    Cycle    12 NS=   128 Truncation Error =  0.012666954
    Cycle    13 NS=   192 Truncation Error =  0.005594558
    Cycle    14 NS=   256 Truncation Error =  0.001379278
    Cycle    15 NS=   384 Truncation Error =  0.001675048
    Cycle    16 NS=   512 Truncation Error =  0.000594289
    Cycle    17 NS=   768 Truncation Error =  0.000105622
    Cycle    18 NS=  1024 Truncation Error =  0.000012421
    Cycle    19 NS=  1536 Truncation Error =  0.000000896
 BS completed in   19 cycles and    5112 integration steps.
 SUMMARY OF CORRECTOR INTEGRATION:
   Original End Point Energy  =  -283.784984
   Corrected End Point Energy =  -283.784985
   Old End-Start Dist.        =     0.321386
   New End-Start Dist.        =     0.321237
   New End-Old End Dist.      =     0.006997
 CORRECTOR INTEGRATION CONVERGENCE:
   Recorrection delta-x convergence threshold:    0.010000
   Delta-x Convergence Met
 Point Number:   2          Path Number:   1
                    CURRENT STRUCTURE
                Cartesian Coordinates (Ang):                
 ---------------------------------------------------------------------
 Center     Atomic                     Coordinates (Angstroms)
 Number     Number                        X           Y           Z
 ---------------------------------------------------------------------
      1          6                   -0.750677    0.365062   -0.001588
      2          6                   -1.837629   -0.617370    0.001502
      3          7                   -0.359185    1.496282   -0.001604
      4          8                    0.714956   -0.958142   -0.001125
      5          1                   -1.790419   -1.234785    0.901650
      6          1                   -2.811720   -0.122222   -0.035507
      7          1                   -1.748649   -1.288369   -0.855794
      8          8                    1.855961   -0.046927    0.001902
      9          1                    1.357678    0.810956    0.000641
 ---------------------------------------------------------------------
   CHANGE IN THE REACTION COORDINATE =    0.32124
   NET REACTION COORDINATE UP TO THIS POINT =    0.64228
  # OF POINTS ALONG THE PATH =   2
  # OF STEPS =   1

 Calculating another point on the path.
 Point Number  3 in REVERSE path direction.
 Using LQA Reaction Path Following.
   LQA: T_Est iteration completed in    3 iterations.
 IRC-IRC-IRC-IRC-IRC-IRC-IRC-IRC-IRC-IRC-IRC-IRC-IRC-IRC-IRC-IRC-IRC-IRC
 Leave Link  123 at Thu Apr 27 11:33:55 2023, MaxMem=   33554432 cpu:     805.6
 (Enter /local/share/g09/l202.exe)
                          Input orientation:                          
 ---------------------------------------------------------------------
 Center     Atomic      Atomic             Coordinates (Angstroms)
 Number     Number       Type             X           Y           Z
 ---------------------------------------------------------------------
      1          6           0       -0.724536    0.345311   -0.001871
      2          6           0       -1.832319   -0.619246    0.001843
      3          7           0       -0.353260    1.487628   -0.002219
      4          8           0        0.696242   -0.938696   -0.001034
      5          1           0       -1.800384   -1.235378    0.904166
      6          1           0       -2.797287   -0.106619   -0.039328
      7          1           0       -1.754908   -1.296195   -0.852480
      8          8           0        1.846335   -0.043587    0.002190
      9          1           0        1.352470    0.819997    0.000499
 ---------------------------------------------------------------------
                    Distance matrix (angstroms):
                    1          2          3          4          5
     1  C    0.000000
     2  C    1.468866   0.000000
     3  N    1.201138   2.574209   0.000000
     4  O    1.915016   2.548662   2.643578   0.000000
     5  H    2.115876   1.093081   3.214104   2.672180   0.000000
     6  H    2.121778   1.093456   2.918265   3.591457   1.777103
     7  H    2.116541   1.092758   3.230671   2.619333   1.758286
     8  O    2.600123   3.723423   2.680085   1.457376   3.941128
     9  H    2.130560   3.494897   1.831735   1.877136   3.870617
                    6          7          8          9
     6  H    0.000000
     7  H    1.778444   0.000000
     8  O    4.644236   3.907486   0.000000
     9  H    4.252140   3.855081   0.994828   0.000000
 Symmetry turned off by external request.
 Stoichiometry    C2H4NO2(1-)
 Framework group  C1[X(C2H4NO2)]
 Deg. of freedom    21
 Full point group                 C1      NOp   1
 Rotational constants (GHZ):      8.9391904      3.9371153      2.7801398
 Leave Link  202 at Thu Apr 27 11:33:55 2023, MaxMem=   33554432 cpu:       0.2
 (Enter /local/share/g09/l301.exe)
 Standard basis: 6-31G(d,p) (6D, 7F)
 Ernie: Thresh=  0.10000D-02 Tol=  0.10000D-05 Strict=F.
 Integral buffers will be    131072 words long.
 Raffenetti 2 integral format.
 Two-electron integral symmetry is turned off.
    95 basis functions,   168 primitive gaussians,    95 cartesian basis functions
    20 alpha electrons       20 beta electrons
       nuclear repulsion energy       161.8874841770 Hartrees.
 IExCor= 4134 DFT=T Ex+Corr=M06L ExCW=0 ScaHFX=  0.000000
 ScaDFX=  1.000000  1.000000  1.000000  1.000000 ScalE2=  1.000000  1.000000
 IRadAn=      5 IRanWt=     -1 IRanGd=            0 ICorTp=0
 NAtoms=    9 NActive=    9 NUniq=    9 SFac= 1.00D+00 NAtFMM=   50 NAOKFM=F Big=F
 ------------------------------------------------------------------------------
 Polarizable Continuum Model (PCM)
 =================================
 Model                : PCM.
 Atomic radii         : SMD-Coulomb.
 Polarization charges : Total charges.
 Charge compensation  : None.
 Solution method      : Matrix inversion.
 Cavity type          : VdW (van der Waals Surface) (Alpha=1.000).
 Cavity algorithm     : GePol (No added spheres)
                        Default sphere list used, NSphG=    9.
                        Lebedev-Laikov grids with approx.  5.0 points / Ang**2.
                        Smoothing algorithm: Karplus/York (Gamma=1.0000).
                        Polarization charges: spherical gaussians, with
                                              point-specific exponents (IZeta= 3).
                        Self-potential: point-specific (ISelfS= 7).
                        Self-field    : sphere-specific E.n sum rule (ISelfD= 2).
 1st derivatives      : Analytical E(r).r(x)/FMM algorithm (CHGder, D1EAlg=3).
                        Cavity 1st derivative terms included.
 2nd derivatives      : Analytical E(r).r(xy)/FMM algorithm (CHGder, D2EAlg=3).
                        Cavity 2nd derivative terms included.
 Solvent              : Water, Eps=  78.355300 Eps(inf)=   1.777849
 ------------------------------------------------------------------------------
 Spheres list:
 ISph  on   Nord    Re0     Alpha      Xe            Ye            Ze
    1   C      1    1.850   1.000     -0.724536      0.345311     -0.001871
    2   C      2    1.850   1.000     -1.832319     -0.619246      0.001843
    3   N      3    1.890   1.000     -0.353260      1.487628     -0.002219
    4   O      4    1.520   1.000      0.696242     -0.938696     -0.001034
    5   H      5    1.200   1.000     -1.800384     -1.235378      0.904166
    6   H      6    1.200   1.000     -2.797287     -0.106619     -0.039328
    7   H      7    1.200   1.000     -1.754908     -1.296195     -0.852480
    8   O      8    1.520   1.000      1.846335     -0.043587      0.002190
    9   H      9    1.200   1.000      1.352470      0.819997      0.000499
 ------------------------------------------------------------------------------
 GePol: Number of generator spheres                  =       9
 GePol: Total number of spheres                      =       9
 GePol: Number of exposed spheres                    =       9 (100.00%)
 GePol: Number of points                             =     795
 GePol: Average weight of points                     =       0.13
 GePol: Minimum weight of points                     =   0.53D-09
 GePol: Maximum weight of points                     =    0.21991
 GePol: Number of points with low weight             =      26
 GePol: Fraction of low-weight points (<1% of avg)   =       3.27%
 GePol: Cavity surface area                          =    103.502 Ang**2
 GePol: Cavity volume                                =     78.223 Ang**3
 ------------------------------------------------------------------------------
 Atomic radii for non-electrostatic terms: SMD-CDS.
 ------------------------------------------------------------------------------
 PCM non-electrostatic energy =         0.0041345309 Hartrees.
 Nuclear repulsion after PCM non-electrostatic terms =      161.8916187079 Hartrees.
 Leave Link  301 at Thu Apr 27 11:33:56 2023, MaxMem=   33554432 cpu:       0.5
 (Enter /local/share/g09/linda-exe/l302.exel)
 NPDir=0 NMtPBC=     1 NCelOv=     1 NCel=       1 NClECP=     1 NCelD=      1
         NCelK=      1 NCelE2=     1 NClLst=     1 CellRange=     0.0.
 One-electron integrals computed using PRISM.
 NBasis=    95 RedAO= T  NBF=    95
 NBsUse=    95 1.00D-06 NBFU=    95
[truncated: 4,199,170 more chars]
