# Supplementary material for: The reaction of acetonitrile with hydrogen peroxide in alkaline medium: a DFT mechanistic study of green production of amides
Source: Royal Society of Chemistry journal article supplement (doi:10.1039/d3cp02024j), 2023-01-01
Supplement: d3cp02024j4.log [file d3cp02024j4.log]

 Entering Gaussian System, Link 0=/local/share/g09/g09
 Initial command:
 /local/share/g09/l1.exe /local/scratch/carlotto/g09run11805/Gau-11868.inp -scrdir=/local/scratch/carlotto/g09run11805/
 Entering Link 1 = /local/share/g09/l1.exe PID=     11869.
  
 Copyright (c) 1988,1990,1992,1993,1995,1998,2003,2009,2010,
            Gaussian, Inc.  All Rights Reserved.
  
 This is part of the Gaussian(R) 09 program.  It is based on
 the Gaussian(R) 03 system (copyright 2003, Gaussian, Inc.),
 the Gaussian(R) 98 system (copyright 1998, Gaussian, Inc.),
 the Gaussian(R) 94 system (copyright 1995, Gaussian, Inc.),
 the Gaussian 92(TM) system (copyright 1992, Gaussian, Inc.),
 the Gaussian 90(TM) system (copyright 1990, Gaussian, Inc.),
 the Gaussian 88(TM) system (copyright 1988, Gaussian, Inc.),
 the Gaussian 86(TM) system (copyright 1986, Carnegie Mellon
 University), and the Gaussian 82(TM) system (copyright 1983,
 Carnegie Mellon University). Gaussian is a federally registered
 trademark of Gaussian, Inc.
  
 This software contains proprietary and confidential information,
 including trade secrets, belonging to Gaussian, Inc.
  
 This software is provided under written license and may be
 used, copied, transmitted, or stored only in accord with that
 written license.
  
 The following legend is applicable only to US Government
 contracts under FAR:
  
                    RESTRICTED RIGHTS LEGEND
  
 Use, reproduction and disclosure by the US Government is
 subject to restrictions as set forth in subparagraphs (a)
 and (c) of the Commercial Computer Software - Restricted
 Rights clause in FAR 52.227-19.
  
 Gaussian, Inc.
 340 Quinnipiac St., Bldg. 40, Wallingford CT 06492
  
  
 ---------------------------------------------------------------
 Warning -- This program may not be used in any manner that
 competes with the business of Gaussian, Inc. or will provide
 assistance to any competitor of Gaussian, Inc.  The licensee
 of this program is prohibited from giving any competitor of
 Gaussian, Inc. access to this program.  By using this program,
 the user acknowledges that Gaussian, Inc. is engaged in the
 business of creating and licensing software in the field of
 computational chemistry and represents and warrants to the
 licensee that it is not a competitor of Gaussian, Inc. and that
 it will not use this program in any manner prohibited above.
 ---------------------------------------------------------------
  

 Cite this work as:
 Gaussian 09, Revision B.01,
 M. J. Frisch, G. W. Trucks, H. B. Schlegel, G. E. Scuseria, 
 M. A. Robb, J. R. Cheeseman, G. Scalmani, V. Barone, B. Mennucci, 
 G. A. Petersson, H. Nakatsuji, M. Caricato, X. Li, H. P. Hratchian, 
 A. F. Izmaylov, J. Bloino, G. Zheng, J. L. Sonnenberg, M. Hada, 
 M. Ehara, K. Toyota, R. Fukuda, J. Hasegawa, M. Ishida, T. Nakajima, 
 Y. Honda, O. Kitao, H. Nakai, T. Vreven, J. A. Montgomery, Jr., 
 J. E. Peralta, F. Ogliaro, M. Bearpark, J. J. Heyd, E. Brothers, 
 K. N. Kudin, V. N. Staroverov, T. Keith, R. Kobayashi, J. Normand, 
 K. Raghavachari, A. Rendell, J. C. Burant, S. S. Iyengar, J. Tomasi, 
 M. Cossi, N. Rega, J. M. Millam, M. Klene, J. E. Knox, J. B. Cross, 
 V. Bakken, C. Adamo, J. Jaramillo, R. Gomperts, R. E. Stratmann, 
 O. Yazyev, A. J. Austin, R. Cammi, C. Pomelli, J. W. Ochterski, 
 R. L. Martin, K. Morokuma, V. G. Zakrzewski, G. A. Voth, 
 P. Salvador, J. J. Dannenberg, S. Dapprich, A. D. Daniels, 
 O. Farkas, J. B. Foresman, J. V. Ortiz, J. Cioslowski, 
 and D. J. Fox, Gaussian, Inc., Wallingford CT, 2010.
 
 ******************************************
 Gaussian 09:  EM64L-G09RevB.01 12-Aug-2010
                27-May-2023 
 ******************************************
 %NProcLinda=4
 Will use up to    4 processors via Linda.
 %NProcShared=4
 Will use up to    4 processors via shared memory.
 %Chk=acn_prot.chk
 ----------------------------------------------------------------------
 #p test rM06L/6-31G(d,p) density=Current int(ultrafine,acc2e=11) GFInp
  opt freq(NoRaman) popul(Full,NBORead) scf(MaxCycle=200) scrf(SMD,solv
 ent=water,)
 ----------------------------------------------------------------------
 1/14=-1,18=20,19=15,26=3,38=1/1,3;
 2/9=110,12=2,17=6,18=5,40=1/2;
 3/5=1,6=6,7=101,11=2,16=1,24=10,25=1,30=1,70=32201,71=1,72=1,74=-53,75=-5,116=1/1,2,3;
 4//1;
 5/5=2,7=200,38=5,53=1,87=11/2;
 6/7=3,22=-1,28=1,40=1/1,7;
 7/87=11/1,2,3,16;
 1/14=-1,18=20,19=15/3(2);
 2/9=110/2;
 99//99;
 2/9=110/2;
 3/5=1,6=6,7=101,11=2,16=1,25=1,30=1,70=32205,71=1,72=1,74=-53,75=-5,116=1/1,2,3;
 4/5=5,16=3/1;
 5/5=2,7=200,38=5,53=1,87=11/2;
 7/87=11/1,2,3,16;
 1/14=-1,18=20,19=15/3(-5);
 2/9=110/2;
 6/7=3,19=2,22=-1,28=1,40=1/1,7;
 99/9=1/99;
 Leave Link    1 at Sat May 27 21:30:51 2023, MaxMem=          0 cpu:       0.4
 (Enter /local/share/g09/l101.exe)
 ---
 TS1
 ---
 Symbolic Z-matrix:
 Charge = -1 Multiplicity = 1
 C                     1.73555  -1.40491  -1.45394 
 C                     2.27448  -0.50833  -0.40099 
 N                     2.13368  -0.50261   0.86643 
 O                     3.06834   0.44875  -0.97243 
 O                     3.60613   1.35      0.03078 
 O                    -0.21744   1.22971  -1.19347 
 O                    -0.97845   0.23423  -0.43905 
 C                    -2.29486   0.54179  -0.36149 
 N                    -2.85212   1.57931  -0.8688 
 C                    -3.02598  -0.51197   0.40063 
 H                     2.54807  -1.90091  -1.99013 
 H                     1.0869   -2.15669  -1.00467 
 H                     1.15822  -0.81614  -2.1707 
 H                     2.65278   0.26714   1.27752 
 H                     4.13614   1.95217  -0.55315 
 H                    -4.07299  -0.23402   0.52193 
 H                    -2.97621  -1.47419  -0.11783 
 H                    -2.58266  -0.6604    1.38942 
 H                    -2.06754   2.06928  -1.31934 
 
 NAtoms=     19 NQM=     19 NQMF=      0 NMic=      0 NMicF=      0 NTot=     19.
 Add atom     13 valence  3 ND=      0 dihedral       7      6     13      1
                    Isotopes and Nuclear Properties:
 (Nuclear quadrupole moments (NQMom) in fm**2, nuclear magnetic moments (NMagM)
  in nuclear magnetons)

  Atom         1           2           3           4           5           6           7           8           9          10
 IAtWgt=          12          12          14          16          16          16          16          12          14          12
 AtmWgt=  12.0000000  12.0000000  14.0030740  15.9949146  15.9949146  15.9949146  15.9949146  12.0000000  14.0030740  12.0000000
 NucSpn=           0           0           2           0           0           0           0           0           2           0
 AtZEff=   0.0000000   0.0000000   0.0000000   0.0000000   0.0000000   0.0000000   0.0000000   0.0000000   0.0000000   0.0000000
 NQMom=    0.0000000   0.0000000   2.0440000   0.0000000   0.0000000   0.0000000   0.0000000   0.0000000   2.0440000   0.0000000
 NMagM=    0.0000000   0.0000000   0.4037610   0.0000000   0.0000000   0.0000000   0.0000000   0.0000000   0.4037610   0.0000000

  Atom        11          12          13          14          15          16          17          18          19
 IAtWgt=           1           1           1           1           1           1           1           1           1
 AtmWgt=   1.0078250   1.0078250   1.0078250   1.0078250   1.0078250   1.0078250   1.0078250   1.0078250   1.0078250
 NucSpn=           1           1           1           1           1           1           1           1           1
 AtZEff=   0.0000000   0.0000000   0.0000000   0.0000000   0.0000000   0.0000000   0.0000000   0.0000000   0.0000000
 NQMom=    0.0000000   0.0000000   0.0000000   0.0000000   0.0000000   0.0000000   0.0000000   0.0000000   0.0000000
 NMagM=    2.7928460   2.7928460   2.7928460   2.7928460   2.7928460   2.7928460   2.7928460   2.7928460   2.7928460
 Leave Link  101 at Sat May 27 21:30:52 2023, MaxMem=   33554432 cpu:       0.7
 (Enter /local/share/g09/l103.exe)

 GradGradGradGradGradGradGradGradGradGradGradGradGradGradGradGradGradGrad
 Berny optimization.
 Initialization pass.
                           ----------------------------
                           !    Initial Parameters    !
                           ! (Angstroms and Degrees)  !
 --------------------------                            --------------------------
 ! Name  Definition              Value          Derivative Info.                !
 --------------------------------------------------------------------------------
 ! R1    R(1,2)                  1.4843         estimate D2E/DX2                !
 ! R2    R(1,6)                  3.2899         estimate D2E/DX2                !
 ! R3    R(1,7)                  3.3291         estimate D2E/DX2                !
 ! R4    R(1,11)                 1.0926         estimate D2E/DX2                !
 ! R5    R(1,12)                 1.0898         estimate D2E/DX2                !
 ! R6    R(1,13)                 1.0926         estimate D2E/DX2                !
 ! R7    R(2,3)                  1.2752         estimate D2E/DX2                !
 ! R8    R(2,4)                  1.3685         estimate D2E/DX2                !
 ! R9    R(2,6)                  3.1398         estimate D2E/DX2                !
 ! R10   R(2,7)                  3.3368         estimate D2E/DX2                !
 ! R11   R(3,14)                 1.0154         estimate D2E/DX2                !
 ! R12   R(4,5)                  1.4519         estimate D2E/DX2                !
 ! R13   R(4,6)                  3.3845         estimate D2E/DX2                !
 ! R14   R(5,15)                 0.9922         estimate D2E/DX2                !
 ! R15   R(6,7)                  1.4626         estimate D2E/DX2                !
 ! R16   R(6,13)                 2.652          estimate D2E/DX2                !
 ! R17   R(7,8)                  1.3541         estimate D2E/DX2                !
 ! R18   R(7,12)                 3.2097         estimate D2E/DX2                !
 ! R19   R(7,13)                 2.944          estimate D2E/DX2                !
 ! R20   R(8,9)                  1.2823         estimate D2E/DX2                !
 ! R21   R(8,10)                 1.4919         estimate D2E/DX2                !
 ! R22   R(9,19)                 1.0289         estimate D2E/DX2                !
 ! R23   R(10,16)                1.09           estimate D2E/DX2                !
 ! R24   R(10,17)                1.0941         estimate D2E/DX2                !
 ! R25   R(10,18)                1.0937         estimate D2E/DX2                !
 ! A1    A(2,1,11)             110.6317         estimate D2E/DX2                !
 ! A2    A(2,1,12)             109.8984         estimate D2E/DX2                !
 ! A3    A(2,1,13)             109.3753         estimate D2E/DX2                !
 ! A4    A(6,1,11)             147.553          estimate D2E/DX2                !
 ! A5    A(6,1,12)              99.582          estimate D2E/DX2                !
 ! A6    A(7,1,11)             168.356          estimate D2E/DX2                !
 ! A7    A(11,1,12)            109.376          estimate D2E/DX2                !
 ! A8    A(11,1,13)            108.4            estimate D2E/DX2                !
 ! A9    A(12,1,13)            109.1268         estimate D2E/DX2                !
 ! A10   A(1,2,3)              131.889          estimate D2E/DX2                !
 ! A11   A(1,2,4)              109.6859         estimate D2E/DX2                !
 ! A12   A(3,2,4)              118.4197         estimate D2E/DX2                !
 ! A13   A(3,2,6)               99.2499         estimate D2E/DX2                !
 ! A14   A(3,2,7)               84.4164         estimate D2E/DX2                !
 ! A15   A(4,2,7)              113.8983         estimate D2E/DX2                !
 ! A16   A(2,3,14)             110.4473         estimate D2E/DX2                !
 ! A17   A(2,4,5)              111.1297         estimate D2E/DX2                !
 ! A18   A(5,4,6)              105.1588         estimate D2E/DX2                !
 ! A19   A(4,5,15)              99.6687         estimate D2E/DX2                !
 ! A20   A(1,6,4)               40.8932         estimate D2E/DX2                !
 ! A21   A(2,6,13)              41.7792         estimate D2E/DX2                !
 ! A22   A(4,6,7)              108.324          estimate D2E/DX2                !
 ! A23   A(4,6,13)              48.8878         estimate D2E/DX2                !
 ! A24   A(1,7,8)              157.1998         estimate D2E/DX2                !
 ! A25   A(2,7,12)              37.716          estimate D2E/DX2                !
 ! A26   A(2,7,13)              38.7206         estimate D2E/DX2                !
 ! A27   A(6,7,8)              112.3823         estimate D2E/DX2                !
 ! A28   A(6,7,12)              94.6629         estimate D2E/DX2                !
 ! A29   A(8,7,12)             143.5964         estimate D2E/DX2                !
 ! A30   A(8,7,13)             145.115          estimate D2E/DX2                !
 ! A31   A(12,7,13)             33.2346         estimate D2E/DX2                !
 ! A32   A(7,8,9)              125.7034         estimate D2E/DX2                !
 ! A33   A(7,8,10)             110.1975         estimate D2E/DX2                !
 ! A34   A(9,8,10)             124.0981         estimate D2E/DX2                !
 ! A35   A(8,9,19)             103.1297         estimate D2E/DX2                !
 ! A36   A(8,10,16)            110.3315         estimate D2E/DX2                !
 ! A37   A(8,10,17)            110.9041         estimate D2E/DX2                !
 ! A38   A(8,10,18)            111.0415         estimate D2E/DX2                !
 ! A39   A(16,10,17)           108.7033         estimate D2E/DX2                !
 ! A40   A(16,10,18)           108.8639         estimate D2E/DX2                !
 ! A41   A(17,10,18)           106.8939         estimate D2E/DX2                !
 ! D1    D(11,1,2,3)          -118.8944         estimate D2E/DX2                !
 ! D2    D(11,1,2,4)            60.2289         estimate D2E/DX2                !
 ! D3    D(12,1,2,3)             1.9889         estimate D2E/DX2                !
 ! D4    D(12,1,2,4)          -178.8877         estimate D2E/DX2                !
 ! D5    D(13,1,2,3)           121.7692         estimate D2E/DX2                !
 ! D6    D(13,1,2,4)           -59.1075         estimate D2E/DX2                !
 ! D7    D(11,1,6,4)           -63.4939         estimate D2E/DX2                !
 ! D8    D(12,1,6,4)           143.2988         estimate D2E/DX2                !
 ! D9    D(11,1,7,8)            51.5052         estimate D2E/DX2                !
 ! D10   D(1,2,3,14)           180.0            estimate D2E/DX2                !
 ! D11   D(4,2,3,14)             0.9385         estimate D2E/DX2                !
 ! D12   D(6,2,3,14)           -91.9913         estimate D2E/DX2                !
 ! D13   D(7,2,3,14)          -113.2613         estimate D2E/DX2                !
 ! D14   D(1,2,4,5)            179.6274         estimate D2E/DX2                !
 ! D15   D(3,2,4,5)             -1.1147         estimate D2E/DX2                !
 ! D16   D(7,2,4,5)             95.7069         estimate D2E/DX2                !
 ! D17   D(3,2,6,13)          -146.2601         estimate D2E/DX2                !
 ! D18   D(3,2,7,12)          -106.4651         estimate D2E/DX2                !
 ! D19   D(3,2,7,13)          -161.5083         estimate D2E/DX2                !
 ! D20   D(4,2,7,12)           134.8678         estimate D2E/DX2                !
 ! D21   D(4,2,7,13)            79.8246         estimate D2E/DX2                !
 ! D22   D(3,2,8,9)            121.2758         estimate D2E/DX2                !
 ! D23   D(3,2,8,10)           -56.3429         estimate D2E/DX2                !
 ! D24   D(4,2,8,9)              3.0667         estimate D2E/DX2                !
 ! D25   D(4,2,8,10)          -174.552          estimate D2E/DX2                !
 ! D26   D(2,4,5,15)          -180.0            estimate D2E/DX2                !
 ! D27   D(6,4,5,15)          -108.1373         estimate D2E/DX2                !
 ! D28   D(5,4,6,1)           -146.946          estimate D2E/DX2                !
 ! D29   D(5,4,6,7)           -101.1126         estimate D2E/DX2                !
 ! D30   D(5,4,6,13)          -168.7768         estimate D2E/DX2                !
 ! D31   D(4,6,7,8)            173.8731         estimate D2E/DX2                !
 ! D32   D(4,6,7,12)           -31.0451         estimate D2E/DX2                !
 ! D33   D(7,6,13,1)           -63.2844         estimate D2E/DX2                !
 ! D34   D(1,7,8,9)           -107.3925         estimate D2E/DX2                !
 ! D35   D(1,7,8,10)            72.2624         estimate D2E/DX2                !
 ! D36   D(6,7,8,9)             -0.3994         estimate D2E/DX2                !
 ! D37   D(6,7,8,10)           179.2555         estimate D2E/DX2                !
 ! D38   D(12,7,8,9)          -135.3608         estimate D2E/DX2                !
 ! D39   D(12,7,8,10)           44.294          estimate D2E/DX2                !
 ! D40   D(13,7,8,9)           -76.6356         estimate D2E/DX2                !
 ! D41   D(13,7,8,10)          103.0193         estimate D2E/DX2                !
 ! D42   D(7,8,9,19)             0.1701         estimate D2E/DX2                !
 ! D43   D(10,8,9,19)         -179.4387         estimate D2E/DX2                !
 ! D44   D(7,8,10,16)          176.2233         estimate D2E/DX2                !
 ! D45   D(7,8,10,17)          -63.273          estimate D2E/DX2                !
 ! D46   D(7,8,10,18)           55.4275         estimate D2E/DX2                !
 ! D47   D(9,8,10,16)           -4.1152         estimate D2E/DX2                !
 ! D48   D(9,8,10,17)          116.3885         estimate D2E/DX2                !
 ! D49   D(9,8,10,18)         -124.911          estimate D2E/DX2                !
 --------------------------------------------------------------------------------
 Trust Radius=3.00D-01 FncErr=1.00D-07 GrdErr=1.00D-06
 Number of steps in this run=    114 maximum allowed number of steps=    114.
 GradGradGradGradGradGradGradGradGradGradGradGradGradGradGradGradGradGrad

 Leave Link  103 at Sat May 27 21:30:52 2023, MaxMem=   33554432 cpu:       0.1
 (Enter /local/share/g09/l202.exe)
                          Input orientation:                          
 ---------------------------------------------------------------------
 Center     Atomic      Atomic             Coordinates (Angstroms)
 Number     Number       Type             X           Y           Z
 ---------------------------------------------------------------------
      1          6           0        1.735552   -1.404907   -1.453936
      2          6           0        2.274484   -0.508332   -0.400986
      3          7           0        2.133684   -0.502612    0.866430
      4          8           0        3.068343    0.448751   -0.972429
      5          8           0        3.606127    1.350003    0.030777
      6          8           0       -0.217444    1.229706   -1.193471
      7          8           0       -0.978450    0.234233   -0.439047
      8          6           0       -2.294860    0.541788   -0.361486
      9          7           0       -2.852120    1.579313   -0.868796
     10          6           0       -3.025978   -0.511969    0.400631
     11          1           0        2.548067   -1.900911   -1.990133
     12          1           0        1.086900   -2.156693   -1.004672
     13          1           0        1.158221   -0.816142   -2.170701
     14          1           0        2.652778    0.267140    1.277523
     15          1           0        4.136139    1.952173   -0.553148
     16          1           0       -4.072992   -0.234018    0.521929
     17          1           0       -2.976205   -1.474193   -0.117831
     18          1           0       -2.582664   -0.660398    1.389424
     19          1           0       -2.067543    2.069279   -1.319337
 ---------------------------------------------------------------------
                    Distance matrix (angstroms):
                    1          2          3          4          5
     1  C    0.000000
     2  C    1.484250   0.000000
     3  N    2.521258   1.275226   0.000000
     4  O    2.333287   1.368491   2.271581   0.000000
     5  O    3.645950   2.326607   2.509699   1.451857   0.000000
     6  O    3.289866   3.139827   3.573782   3.384545   4.016584
     7  O    3.329052   3.336829   3.454358   4.087426   4.741732
     8  C    4.607308   4.688626   4.712807   5.398690   5.968981
     9  N    5.504061   5.555104   5.674827   6.028332   6.524628
    10  C    5.187381   5.360737   5.180653   6.320524   6.898445
    11  H    1.092569   2.130613   3.207321   2.612914   3.971399
    12  H    1.089848   2.119407   2.707908   3.273453   4.440223
    13  H    1.092569   2.114871   3.205307   2.585416   3.940931
    14  H    3.331353   1.887288   1.015369   2.295204   1.906788
    15  H    4.224242   3.089174   3.471455   1.891101   0.992215
    16  H    6.246135   6.420083   6.222029   7.327888   7.856158
    17  H    4.898023   5.346288   5.293742   6.400360   7.164165
    18  H    5.223598   5.178859   4.747879   6.224343   6.647463
    19  H    5.152826   5.132314   5.389110   5.396645   5.876283
                    6          7          8          9         10
     6  O    0.000000
     7  O    1.462618   0.000000
     8  C    2.341172   1.354083   0.000000
     9  N    2.677528   2.346181   1.282326   0.000000
    10  C    3.669122   2.335433   1.491898   2.452577   0.000000
    11  H    4.252468   4.404660   5.663322   6.521608   6.222129
    12  H    3.633821   3.209693   4.373990   5.430661   4.647124
    13  H    2.651967   2.944024   4.128075   4.849329   4.920548
    14  H    3.907751   4.016654   5.219282   6.052469   5.798640
    15  H    4.459334   5.396606   6.586628   7.005314   7.633977
    16  H    4.466580   3.273977   2.131678   2.590910   1.090050
    17  H    4.009842   2.648193   2.141910   3.146942   1.094146
    18  H    3.979712   2.591751   2.143308   3.191938   1.093741
    19  H    2.035581   2.308339   1.817245   1.028890   3.246495
                   11         12         13         14         15
    11  H    0.000000
    12  H    1.780889   0.000000
    13  H    1.772287   1.778142   0.000000
    14  H    3.922880   3.679043   3.911195   0.000000
    15  H    4.408305   5.136586   4.375847   2.896731   0.000000
    16  H    7.275123   5.714164   5.912251   6.786609   8.563005
    17  H    5.848520   4.214394   4.662701   6.055139   7.906638
    18  H    6.267749   4.629935   5.166524   5.318148   7.466018
    19  H    6.125050   5.282837   4.410899   5.680917   6.251914
                   16         17         18         19
    16  H    0.000000
    17  H    1.774900   0.000000
    18  H    1.776352   1.757542   0.000000
    19  H    3.566127   3.850387   3.879932   0.000000
 Stoichiometry    C4H9N2O4(1-)
 Framework group  C1[X(C4H9N2O4)]
 Deg. of freedom    51
 Full point group                 C1      NOp   1
 Largest Abelian subgroup         C1      NOp   1
 Largest concise Abelian subgroup C1      NOp   1
                         Standard orientation:                         
 ---------------------------------------------------------------------
 Center     Atomic      Atomic             Coordinates (Angstroms)
 Number     Number       Type             X           Y           Z
 ---------------------------------------------------------------------
      1          6           0       -1.429957    1.412767   -1.225913
      2          6           0       -1.914210    0.675315   -0.032322
      3          7           0       -1.754676    0.878148    1.216520
      4          8           0       -2.674401   -0.392004   -0.426922
      5          8           0       -3.158038   -1.141984    0.718292
      6          8           0        0.638384   -1.065558   -0.591017
      7          8           0        1.366791    0.067585   -0.021226
      8          6           0        2.696230   -0.170432    0.076143
      9          7           0        3.290167   -1.252520   -0.271255
     10          6           0        3.392382    1.020226    0.644884
     11          1           0       -2.270888    1.783511   -1.816753
     12          1           0       -0.807771    2.252214   -0.916101
     13          1           0       -0.838389    0.740578   -1.851946
     14          1           0       -2.234015    0.163865    1.755973
     15          1           0       -3.670134   -1.850645    0.249201
     16          1           0        4.452072    0.807579    0.786471
     17          1           0        3.293571    1.884296   -0.019024
     18          1           0        2.957669    1.307032    1.606673
     19          1           0        2.520895   -1.839403   -0.621118
 ---------------------------------------------------------------------
 Rotational constants (GHZ):      2.3621233      0.5341745      0.5011577
 Leave Link  202 at Sat May 27 21:30:53 2023, MaxMem=   33554432 cpu:       0.2
 (Enter /local/share/g09/l301.exe)
 Standard basis: 6-31G(d,p) (6D, 7F)
 Ernie: Thresh=  0.10000D-02 Tol=  0.10000D-05 Strict=F.
 AO basis set in the form of general basis input (Overlap normalization):
      1 0
 S   6 1.00       0.000000000000
      0.3047524880D+04  0.1834737132D-02
      0.4573695180D+03  0.1403732281D-01
      0.1039486850D+03  0.6884262226D-01
      0.2921015530D+02  0.2321844432D+00
      0.9286662960D+01  0.4679413484D+00
      0.3163926960D+01  0.3623119853D+00
 SP   3 1.00       0.000000000000
      0.7868272350D+01 -0.1193324198D+00  0.6899906659D-01
      0.1881288540D+01 -0.1608541517D+00  0.3164239610D+00
      0.5442492580D+00  0.1143456438D+01  0.7443082909D+00
 SP   1 1.00       0.000000000000
      0.1687144782D+00  0.1000000000D+01  0.1000000000D+01
 D   1 1.00       0.000000000000
      0.8000000000D+00  0.1000000000D+01
 ****
      2 0
 S   6 1.00       0.000000000000
      0.3047524880D+04  0.1834737132D-02
      0.4573695180D+03  0.1403732281D-01
      0.1039486850D+03  0.6884262226D-01
      0.2921015530D+02  0.2321844432D+00
      0.9286662960D+01  0.4679413484D+00
      0.3163926960D+01  0.3623119853D+00
 SP   3 1.00       0.000000000000
      0.7868272350D+01 -0.1193324198D+00  0.6899906659D-01
      0.1881288540D+01 -0.1608541517D+00  0.3164239610D+00
      0.5442492580D+00  0.1143456438D+01  0.7443082909D+00
 SP   1 1.00       0.000000000000
      0.1687144782D+00  0.1000000000D+01  0.1000000000D+01
 D   1 1.00       0.000000000000
      0.8000000000D+00  0.1000000000D+01
 ****
      3 0
 S   6 1.00       0.000000000000
      0.4173511460D+04  0.1834772160D-02
      0.6274579110D+03  0.1399462700D-01
      0.1429020930D+03  0.6858655181D-01
      0.4023432930D+02  0.2322408730D+00
      0.1282021290D+02  0.4690699481D+00
      0.4390437010D+01  0.3604551991D+00
 SP   3 1.00       0.000000000000
      0.1162636186D+02 -0.1149611817D+00  0.6757974388D-01
      0.2716279807D+01 -0.1691174786D+00  0.3239072959D+00
      0.7722183966D+00  0.1145851947D+01  0.7408951398D+00
 SP   1 1.00       0.000000000000
      0.2120314975D+00  0.1000000000D+01  0.1000000000D+01
 D   1 1.00       0.000000000000
      0.8000000000D+00  0.1000000000D+01
 ****
      4 0
 S   6 1.00       0.000000000000
      0.5484671660D+04  0.1831074430D-02
      0.8252349460D+03  0.1395017220D-01
      0.1880469580D+03  0.6844507810D-01
      0.5296450000D+02  0.2327143360D+00
      0.1689757040D+02  0.4701928980D+00
      0.5799635340D+01  0.3585208530D+00
 SP   3 1.00       0.000000000000
      0.1553961625D+02 -0.1107775495D+00  0.7087426823D-01
      0.3599933586D+01 -0.1480262627D+00  0.3397528391D+00
      0.1013761750D+01  0.1130767015D+01  0.7271585773D+00
 SP   1 1.00       0.000000000000
      0.2700058226D+00  0.1000000000D+01  0.1000000000D+01
 D   1 1.00       0.000000000000
      0.8000000000D+00  0.1000000000D+01
 ****
      5 0
 S   6 1.00       0.000000000000
      0.5484671660D+04  0.1831074430D-02
      0.8252349460D+03  0.1395017220D-01
      0.1880469580D+03  0.6844507810D-01
      0.5296450000D+02  0.2327143360D+00
      0.1689757040D+02  0.4701928980D+00
      0.5799635340D+01  0.3585208530D+00
 SP   3 1.00       0.000000000000
      0.1553961625D+02 -0.1107775495D+00  0.7087426823D-01
      0.3599933586D+01 -0.1480262627D+00  0.3397528391D+00
      0.1013761750D+01  0.1130767015D+01  0.7271585773D+00
 SP   1 1.00       0.000000000000
      0.2700058226D+00  0.1000000000D+01  0.1000000000D+01
 D   1 1.00       0.000000000000
      0.8000000000D+00  0.1000000000D+01
 ****
      6 0
 S   6 1.00       0.000000000000
      0.5484671660D+04  0.1831074430D-02
      0.8252349460D+03  0.1395017220D-01
      0.1880469580D+03  0.6844507810D-01
      0.5296450000D+02  0.2327143360D+00
      0.1689757040D+02  0.4701928980D+00
      0.5799635340D+01  0.3585208530D+00
 SP   3 1.00       0.000000000000
      0.1553961625D+02 -0.1107775495D+00  0.7087426823D-01
      0.3599933586D+01 -0.1480262627D+00  0.3397528391D+00
      0.1013761750D+01  0.1130767015D+01  0.7271585773D+00
 SP   1 1.00       0.000000000000
      0.2700058226D+00  0.1000000000D+01  0.1000000000D+01
 D   1 1.00       0.000000000000
      0.8000000000D+00  0.1000000000D+01
 ****
      7 0
 S   6 1.00       0.000000000000
      0.5484671660D+04  0.1831074430D-02
      0.8252349460D+03  0.1395017220D-01
      0.1880469580D+03  0.6844507810D-01
      0.5296450000D+02  0.2327143360D+00
      0.1689757040D+02  0.4701928980D+00
      0.5799635340D+01  0.3585208530D+00
 SP   3 1.00       0.000000000000
      0.1553961625D+02 -0.1107775495D+00  0.7087426823D-01
      0.3599933586D+01 -0.1480262627D+00  0.3397528391D+00
      0.1013761750D+01  0.1130767015D+01  0.7271585773D+00
 SP   1 1.00       0.000000000000
      0.2700058226D+00  0.1000000000D+01  0.1000000000D+01
 D   1 1.00       0.000000000000
      0.8000000000D+00  0.1000000000D+01
 ****
      8 0
 S   6 1.00       0.000000000000
      0.3047524880D+04  0.1834737132D-02
      0.4573695180D+03  0.1403732281D-01
      0.1039486850D+03  0.6884262226D-01
      0.2921015530D+02  0.2321844432D+00
      0.9286662960D+01  0.4679413484D+00
      0.3163926960D+01  0.3623119853D+00
 SP   3 1.00       0.000000000000
      0.7868272350D+01 -0.1193324198D+00  0.6899906659D-01
      0.1881288540D+01 -0.1608541517D+00  0.3164239610D+00
      0.5442492580D+00  0.1143456438D+01  0.7443082909D+00
 SP   1 1.00       0.000000000000
      0.1687144782D+00  0.1000000000D+01  0.1000000000D+01
 D   1 1.00       0.000000000000
      0.8000000000D+00  0.1000000000D+01
 ****
      9 0
 S   6 1.00       0.000000000000
      0.4173511460D+04  0.1834772160D-02
      0.6274579110D+03  0.1399462700D-01
      0.1429020930D+03  0.6858655181D-01
      0.4023432930D+02  0.2322408730D+00
      0.1282021290D+02  0.4690699481D+00
      0.4390437010D+01  0.3604551991D+00
 SP   3 1.00       0.000000000000
      0.1162636186D+02 -0.1149611817D+00  0.6757974388D-01
      0.2716279807D+01 -0.1691174786D+00  0.3239072959D+00
      0.7722183966D+00  0.1145851947D+01  0.7408951398D+00
 SP   1 1.00       0.000000000000
      0.2120314975D+00  0.1000000000D+01  0.1000000000D+01
 D   1 1.00       0.000000000000
      0.8000000000D+00  0.1000000000D+01
 ****
     10 0
 S   6 1.00       0.000000000000
      0.3047524880D+04  0.1834737132D-02
      0.4573695180D+03  0.1403732281D-01
      0.1039486850D+03  0.6884262226D-01
      0.2921015530D+02  0.2321844432D+00
      0.9286662960D+01  0.4679413484D+00
      0.3163926960D+01  0.3623119853D+00
 SP   3 1.00       0.000000000000
      0.7868272350D+01 -0.1193324198D+00  0.6899906659D-01
      0.1881288540D+01 -0.1608541517D+00  0.3164239610D+00
      0.5442492580D+00  0.1143456438D+01  0.7443082909D+00
 SP   1 1.00       0.000000000000
      0.1687144782D+00  0.1000000000D+01  0.1000000000D+01
 D   1 1.00       0.000000000000
      0.8000000000D+00  0.1000000000D+01
 ****
     11 0
 S   3 1.00       0.000000000000
      0.1873113696D+02  0.3349460434D-01
      0.2825394365D+01  0.2347269535D+00
      0.6401216923D+00  0.8137573261D+00
 S   1 1.00       0.000000000000
      0.1612777588D+00  0.1000000000D+01
 P   1 1.00       0.000000000000
      0.1100000000D+01  0.1000000000D+01
 ****
     12 0
 S   3 1.00       0.000000000000
      0.1873113696D+02  0.3349460434D-01
      0.2825394365D+01  0.2347269535D+00
      0.6401216923D+00  0.8137573261D+00
 S   1 1.00       0.000000000000
      0.1612777588D+00  0.1000000000D+01
 P   1 1.00       0.000000000000
      0.1100000000D+01  0.1000000000D+01
 ****
     13 0
 S   3 1.00       0.000000000000
      0.1873113696D+02  0.3349460434D-01
      0.2825394365D+01  0.2347269535D+00
      0.6401216923D+00  0.8137573261D+00
 S   1 1.00       0.000000000000
      0.1612777588D+00  0.1000000000D+01
 P   1 1.00       0.000000000000
      0.1100000000D+01  0.1000000000D+01
 ****
     14 0
 S   3 1.00       0.000000000000
      0.1873113696D+02  0.3349460434D-01
      0.2825394365D+01  0.2347269535D+00
      0.6401216923D+00  0.8137573261D+00
 S   1 1.00       0.000000000000
      0.1612777588D+00  0.1000000000D+01
 P   1 1.00       0.000000000000
      0.1100000000D+01  0.1000000000D+01
 ****
     15 0
 S   3 1.00       0.000000000000
      0.1873113696D+02  0.3349460434D-01
      0.2825394365D+01  0.2347269535D+00
      0.6401216923D+00  0.8137573261D+00
 S   1 1.00       0.000000000000
      0.1612777588D+00  0.1000000000D+01
 P   1 1.00       0.000000000000
      0.1100000000D+01  0.1000000000D+01
 ****
     16 0
 S   3 1.00       0.000000000000
      0.1873113696D+02  0.3349460434D-01
      0.2825394365D+01  0.2347269535D+00
      0.6401216923D+00  0.8137573261D+00
 S   1 1.00       0.000000000000
      0.1612777588D+00  0.1000000000D+01
 P   1 1.00       0.000000000000
      0.1100000000D+01  0.1000000000D+01
 ****
     17 0
 S   3 1.00       0.000000000000
      0.1873113696D+02  0.3349460434D-01
      0.2825394365D+01  0.2347269535D+00
      0.6401216923D+00  0.8137573261D+00
 S   1 1.00       0.000000000000
      0.1612777588D+00  0.1000000000D+01
 P   1 1.00       0.000000000000
      0.1100000000D+01  0.1000000000D+01
 ****
     18 0
 S   3 1.00       0.000000000000
      0.1873113696D+02  0.3349460434D-01
      0.2825394365D+01  0.2347269535D+00
      0.6401216923D+00  0.8137573261D+00
 S   1 1.00       0.000000000000
      0.1612777588D+00  0.1000000000D+01
 P   1 1.00       0.000000000000
      0.1100000000D+01  0.1000000000D+01
 ****
     19 0
 S   3 1.00       0.000000000000
      0.1873113696D+02  0.3349460434D-01
      0.2825394365D+01  0.2347269535D+00
      0.6401216923D+00  0.8137573261D+00
 S   1 1.00       0.000000000000
      0.1612777588D+00  0.1000000000D+01
 P   1 1.00       0.000000000000
      0.1100000000D+01  0.1000000000D+01
 ****

 There are   195 symmetry adapted basis functions of A   symmetry.
 Integral buffers will be    131072 words long.
 Raffenetti 2 integral format.
 Two-electron integral symmetry is turned on.
   195 basis functions,   343 primitive gaussians,   195 cartesian basis functions
    40 alpha electrons       40 beta electrons
       nuclear repulsion energy       530.0597173881 Hartrees.
 IExCor= 4134 DFT=T Ex+Corr=M06L ExCW=0 ScaHFX=  0.000000
 ScaDFX=  1.000000  1.000000  1.000000  1.000000 ScalE2=  1.000000  1.000000
 IRadAn=      5 IRanWt=     -1 IRanGd=            0 ICorTp=0
 NAtoms=   19 NActive=   19 NUniq=   19 SFac= 1.00D+00 NAtFMM=   50 NAOKFM=F Big=F
 ------------------------------------------------------------------------------
 Polarizable Continuum Model (PCM)
 =================================
 Model                : PCM.
 Atomic radii         : SMD-Coulomb.
 Polarization charges : Total charges.
 Charge compensation  : None.
 Solution method      : Matrix inversion.
 Cavity type          : VdW (van der Waals Surface) (Alpha=1.000).
 Cavity algorithm     : GePol (No added spheres)
                        Default sphere list used, NSphG=   19.
                        Lebedev-Laikov grids with approx.  5.0 points / Ang**2.
                        Smoothing algorithm: Karplus/York (Gamma=1.0000).
                        Polarization charges: spherical gaussians, with
                                              point-specific exponents (IZeta= 3).
                        Self-potential: point-specific (ISelfS= 7).
                        Self-field    : sphere-specific E.n sum rule (ISelfD= 2).
 1st derivatives      : Analytical E(r).r(x)/FMM algorithm (CHGder, D1EAlg=3).
                        Cavity 1st derivative terms included.
 Solvent              : Water, Eps=  78.355300 Eps(inf)=   1.777849
 ------------------------------------------------------------------------------
 Spheres list:
 ISph  on   Nord    Re0     Alpha      Xe            Ye            Ze
    1   C      1    1.850   1.000     -1.429957      1.412767     -1.225913
    2   C      2    1.850   1.000     -1.914210      0.675315     -0.032322
    3   N      3    1.890   1.000     -1.754676      0.878148      1.216520
    4   O      4    1.520   1.000     -2.674401     -0.392004     -0.426922
    5   O      5    1.520   1.000     -3.158038     -1.141984      0.718292
    6   O      6    1.520   1.000      0.638384     -1.065558     -0.591017
    7   O      7    1.520   1.000      1.366791      0.067585     -0.021226
    8   C      8    1.850   1.000      2.696230     -0.170432      0.076143
    9   N      9    1.890   1.000      3.290167     -1.252520     -0.271255
   10   C     10    1.850   1.000      3.392382      1.020226      0.644884
   11   H     11    1.200   1.000     -2.270888      1.783511     -1.816753
   12   H     12    1.200   1.000     -0.807771      2.252214     -0.916101
   13   H     13    1.200   1.000     -0.838389      0.740578     -1.851946
   14   H     14    1.200   1.000     -2.234015      0.163865      1.755973
   15   H     15    1.200   1.000     -3.670134     -1.850645      0.249201
   16   H     16    1.200   1.000      4.452072      0.807579      0.786471
   17   H     17    1.200   1.000      3.293571      1.884296     -0.019024
   18   H     18    1.200   1.000      2.957669      1.307032      1.606673
   19   H     19    1.200   1.000      2.520895     -1.839403     -0.621118
 ------------------------------------------------------------------------------
 GePol: Number of generator spheres                  =      19
 GePol: Total number of spheres                      =      19
 GePol: Number of exposed spheres                    =      19 (100.00%)
 GePol: Number of points                             =    1609
 GePol: Average weight of points                     =       0.12
 GePol: Minimum weight of points                     =   0.42D-11
 GePol: Maximum weight of points                     =    0.21991
 GePol: Number of points with low weight             =      83
 GePol: Fraction of low-weight points (<1% of avg)   =       5.16%
 GePol: Cavity surface area                          =    199.796 Ang**2
 GePol: Cavity volume                                =    153.209 Ang**3
 ------------------------------------------------------------------------------
 Atomic radii for non-electrostatic terms: SMD-CDS.
 ------------------------------------------------------------------------------
 PCM non-electrostatic energy =         0.0040956827 Hartrees.
 Nuclear repulsion after PCM non-electrostatic terms =      530.0638130708 Hartrees.
 Leave Link  301 at Sat May 27 21:30:53 2023, MaxMem=   33554432 cpu:       0.6
 (Enter /local/share/g09/linda-exe/l302.exel)
 NPDir=0 NMtPBC=     1 NCelOv=     1 NCel=       1 NClECP=     1 NCelD=      1
         NCelK=      1 NCelE2=     1 NClLst=     1 CellRange=     0.0.
 One-electron integrals computed using PRISM.
 NBasis=   195 RedAO= T  NBF=   195
 NBsUse=   195 1.00D-06 NBFU=   195
 Precomputing XC quadrature grid using
 IXCGrd= 2 IRadAn=           5 IRanWt=          -1 IRanGd=           0 AccXCQ= 0.00D+00.
 NRdTot=    1585 NPtTot=      426630 NUsed=      437985 NTot=      438017
 NSgBfM=   194   194   194   194   194 NAtAll=    19    19.
 Leave Link  302 at Sat May 27 21:30:58 2023, MaxMem=   33554432 cpu:       3.6
 (Enter /local/share/g09/l303.exe)
 DipDrv:  MaxL=1.
 Leave Link  303 at Sat May 27 21:30:58 2023, MaxMem=   33554432 cpu:       0.5
 (Enter /local/share/g09/linda-exe/l401.exel)
 Harris functional with IExCor= 1009 diagonalized for initial guess.
 ExpMin= 1.61D-01 ExpMax= 5.48D+03 ExpMxC= 8.25D+02 IAcc=3 IRadAn=         5 AccDes= 0.00D+00
 HarFok:  IExCor= 1009 AccDes= 0.00D+00 IRadAn=         5 IDoV= 1
 ScaDFX=  1.000000  1.000000  1.000000  1.000000
 FoFCou: FMM=F IPFlag=           0 FMFlag=      100000 FMFlg1=           0
         NFxFlg=           0 DoJE=T BraDBF=F KetDBF=T FulRan=T
         Omega=  0.000000  0.000000  1.000000  0.000000  0.000000 ICntrl=     500 IOpCl=  0
         NMat0=    1 NMatS0=    1 NMatT0=    0 NMatD0=    1 NMtDS0=    0 NMtDT0=    0
         I1Cent=           4 NGrid=           0.
 Petite list used in FoFCou.
 Harris En= -567.742410320736    
 Initial guess orbital symmetries:
       Occupied  (A) (A) (A) (A) (A) (A) (A) (A) (A) (A) (A) (A)
                 (A) (A) (A) (A) (A) (A) (A) (A) (A) (A) (A) (A)
                 (A) (A) (A) (A) (A) (A) (A) (A) (A) (A) (A) (A)
                 (A) (A) (A) (A)
       Virtual   (A) (A) (A) (A) (A) (A) (A) (A) (A) (A) (A) (A)
                 (A) (A) (A) (A) (A) (A) (A) (A) (A) (A) (A) (A)
                 (A) (A) (A) (A) (A) (A) (A) (A) (A) (A) (A) (A)
                 (A) (A) (A) (A) (A) (A) (A) (A) (A) (A) (A) (A)
                 (A) (A) (A) (A) (A) (A) (A) (A) (A) (A) (A) (A)
                 (A) (A) (A) (A) (A) (A) (A) (A) (A) (A) (A) (A)
                 (A) (A) (A) (A) (A) (A) (A) (A) (A) (A) (A) (A)
                 (A) (A) (A) (A) (A) (A) (A) (A) (A) (A) (A) (A)
                 (A) (A) (A) (A) (A) (A) (A) (A) (A) (A) (A) (A)
                 (A) (A) (A) (A) (A) (A) (A) (A) (A) (A) (A) (A)
                 (A) (A) (A) (A) (A) (A) (A) (A) (A) (A) (A) (A)
                 (A) (A) (A) (A) (A) (A) (A) (A) (A) (A) (A) (A)
                 (A) (A) (A) (A) (A) (A) (A) (A) (A) (A) (A)
 The electronic state of the initial guess is 1-A.
 Leave Link  401 at Sat May 27 21:31:05 2023, MaxMem=   33554432 cpu:       6.5
 (Enter /local/share/g09/linda-exe/l502.exel)
 Closed shell SCF:
 Requested convergence on RMS density matrix=1.00D-08 within 200 cycles.
 Requested convergence on MAX density matrix=1.00D-06.
 Requested convergence on             energy=1.00D-06.
 No special actions if energy rises.
 Using DIIS extrapolation, IDIIS=  1040.
 Integral symmetry usage will be decided dynamically.
       437801 words used for storage of precomputed grid.
 IEnd=      596638 IEndB=      596638 NGot=    33554432 MDV=    33036415
 LenX=    33036415 LenY=    32997949
 Fock matrices will be formed incrementally for  20 cycles.

 Cycle   1  Pass 1  IDiag  1:
 FoFCou: FMM=F IPFlag=           0 FMFlag=      100000 FMFlg1=           0
         NFxFlg=           0 DoJE=T BraDBF=F KetDBF=F FulRan=T
         Omega=  0.000000  0.000000  1.000000  0.000000  0.000000 ICntrl=     500 IOpCl=  0
         NMat0=    1 NMatS0=    1 NMatT0=    0 NMatD0=    1 NMtDS0=    0 NMtDT0=    0
         I1Cent=           0 NGrid=           0.
 Symmetry not used in FoFCou.
 E= -567.838026558399    
 DIIS: error= 2.13D-02 at cycle   1 NSaved=   1.
 NSaved= 1 IEnMin= 1 EnMin= -567.838026558399     IErMin= 1 ErrMin= 2.13D-02
 ErrMax= 2.13D-02 EMaxC= 1.00D-01 BMatC= 3.52D-01 BMatP= 3.52D-01
 IDIUse=3 WtCom= 7.87D-01 WtEn= 2.13D-01
 Coeff-Com:  0.100D+01
 Coeff-En:   0.100D+01
 Coeff:      0.100D+01
 Gap=     0.108 Goal=   None    Shift=    0.000
 GapD=    0.108 DampG=1.000 DampE=0.500 DampFc=0.5000 IDamp=-1.
 Damping current iteration by 5.00D-01
 RMSDP=6.28D-03 MaxDP=1.99D-01              OVMax= 3.52D-01

 Cycle   2  Pass 1  IDiag  1:
 RMSU=  2.21D-03    CP:  9.86D-01
 E= -567.899390977678     Delta-E=       -0.061364419279 Rises=F Damp=T
 DIIS: error= 1.33D-02 at cycle   2 NSaved=   2.
 NSaved= 2 IEnMin= 2 EnMin= -567.899390977678     IErMin= 2 ErrMin= 1.33D-02
 ErrMax= 1.33D-02 EMaxC= 1.00D-01 BMatC= 7.21D-02 BMatP= 3.52D-01
 IDIUse=3 WtCom= 8.67D-01 WtEn= 1.33D-01
 Coeff-Com:  0.235D+00 0.765D+00
 Coeff-En:   0.393D+00 0.607D+00
 Coeff:      0.256D+00 0.744D+00
 Gap=     0.125 Goal=   None    Shift=    0.000
 RMSDP=2.09D-03 MaxDP=6.53D-02 DE=-6.14D-02 OVMax= 2.65D-01

 Cycle   3  Pass 1  IDiag  1:
 RMSU=  1.31D-03    CP:  9.84D-01  6.94D-01
 E= -568.070696373708     Delta-E=       -0.171305396030 Rises=F Damp=F
 DIIS: error= 1.48D-02 at cycle   3 NSaved=   3.
 NSaved= 3 IEnMin= 3 EnMin= -568.070696373708     IErMin= 2 ErrMin= 1.33D-02
 ErrMax= 1.48D-02 EMaxC= 1.00D-01 BMatC= 6.08D-02 BMatP= 7.21D-02
 IDIUse=3 WtCom= 8.52D-01 WtEn= 1.48D-01
 Coeff-Com:  0.495D-01 0.470D+00 0.481D+00
 Coeff-En:   0.000D+00 0.000D+00 0.100D+01
 Coeff:      0.421D-01 0.400D+00 0.558D+00
 Gap=     0.119 Goal=   None    Shift=    0.000
 RMSDP=1.50D-03 MaxDP=5.63D-02 DE=-1.71D-01 OVMax= 8.59D-02

 Cycle   4  Pass 1  IDiag  1:
 RMSU=  5.11D-04    CP:  9.88D-01  8.38D-01  3.38D-01
 E= -568.108186553327     Delta-E=       -0.037490179619 Rises=F Damp=F
 DIIS: error= 8.45D-03 at cycle   4 NSaved=   4.
 NSaved= 4 IEnMin= 4 EnMin= -568.108186553327     IErMin= 4 ErrMin= 8.45D-03
 ErrMax= 8.45D-03 EMaxC= 1.00D-01 BMatC= 1.94D-02 BMatP= 6.08D-02
 IDIUse=3 WtCom= 9.16D-01 WtEn= 8.45D-02
 Coeff-Com:  0.184D-02 0.534D-01 0.364D+00 0.580D+00
 Coeff-En:   0.000D+00 0.000D+00 0.282D+00 0.718D+00
 Coeff:      0.169D-02 0.489D-01 0.357D+00 0.592D+00
 Gap=     0.114 Goal=   None    Shift=    0.000
 RMSDP=5.66D-04 MaxDP=2.45D-02 DE=-3.75D-02 OVMax= 2.72D-02

 Cycle   5  Pass 1  IDiag  1:
 RMSU=  1.54D-04    CP:  9.87D-01  7.90D-01  5.54D-01  5.87D-01
 E= -568.123347687592     Delta-E=       -0.015161134265 Rises=F Damp=F
 DIIS: error= 1.77D-03 at cycle   5 NSaved=   5.
 NSaved= 5 IEnMin= 5 EnMin= -568.123347687592     IErMin= 5 ErrMin= 1.77D-03
 ErrMax= 1.77D-03 EMaxC= 1.00D-01 BMatC= 1.24D-03 BMatP= 1.94D-02
 IDIUse=3 WtCom= 9.82D-01 WtEn= 1.77D-02
 Coeff-Com: -0.142D-02 0.101D-01 0.203D+00 0.376D+00 0.412D+00
 Coeff-En:   0.000D+00 0.000D+00 0.000D+00 0.000D+00 0.100D+01
 Coeff:     -0.139D-02 0.990D-02 0.199D+00 0.370D+00 0.423D+00
 Gap=     0.117 Goal=   None    Shift=    0.000
 RMSDP=1.47D-04 MaxDP=6.11D-03 DE=-1.52D-02 OVMax= 8.03D-03

 Cycle   6  Pass 1  IDiag  1:
 RMSU=  3.94D-05    CP:  9.87D-01  7.90D-01  5.59D-01  6.42D-01  4.05D-01
 E= -568.124288173570     Delta-E=       -0.000940485979 Rises=F Damp=F
 DIIS: error= 3.69D-04 at cycle   6 NSaved=   6.
 NSaved= 6 IEnMin= 6 EnMin= -568.124288173570     IErMin= 6 ErrMin= 3.69D-04
 ErrMax= 3.69D-04 EMaxC= 1.00D-01 BMatC= 5.16D-05 BMatP= 1.24D-03
 IDIUse=3 WtCom= 9.96D-01 WtEn= 3.69D-03
 Coeff-Com: -0.121D-02 0.104D-02 0.690D-01 0.133D+00 0.225D+00 0.573D+00
 Coeff-En:   0.000D+00 0.000D+00 0.000D+00 0.000D+00 0.000D+00 0.100D+01
 Coeff:     -0.121D-02 0.104D-02 0.688D-01 0.133D+00 0.224D+00 0.574D+00
 Gap=     0.117 Goal=   None    Shift=    0.000
 RMSDP=3.29D-05 MaxDP=1.52D-03 DE=-9.40D-04 OVMax= 2.01D-03

 Cycle   7  Pass 1  IDiag  1:
 RMSU=  1.55D-05    CP:  9.87D-01  7.91D-01  5.59D-01  6.41D-01  4.77D-01
                    CP:  6.66D-01
 E= -568.124325584454     Delta-E=       -0.000037410883 Rises=F Damp=F
 DIIS: error= 1.17D-04 at cycle   7 NSaved=   7.
 NSaved= 7 IEnMin= 7 EnMin= -568.124325584454     IErMin= 7 ErrMin= 1.17D-04
 ErrMax= 1.17D-04 EMaxC= 1.00D-01 BMatC= 5.73D-06 BMatP= 5.16D-05
 IDIUse=3 WtCom= 9.99D-01 WtEn= 1.17D-03
 Coeff-Com: -0.682D-03 0.132D-03 0.219D-01 0.424D-01 0.935D-01 0.333D+00
 Coeff-Com:  0.509D+00
 Coeff-En:   0.000D+00 0.000D+00 0.000D+00 0.000D+00 0.000D+00 0.418D-01
 Coeff-En:   0.958D+00
 Coeff:     -0.681D-03 0.132D-03 0.219D-01 0.424D-01 0.934D-01 0.333D+00
 Coeff:      0.510D+00
 Gap=     0.117 Goal=   None    Shift=    0.000
 RMSDP=1.24D-05 MaxDP=4.57D-04 DE=-3.74D-05 OVMax= 7.91D-04

 Cycle   8  Pass 1  IDiag  1:
 RMSU=  5.06D-06    CP:  9.87D-01  7.91D-01  5.59D-01  6.40D-01  4.74D-01
                    CP:  7.14D-01  5.59D-01
 E= -568.124329809713     Delta-E=       -0.000004225259 Rises=F Damp=F
 DIIS: error= 4.35D-05 at cycle   8 NSaved=   8.
 NSaved= 8 IEnMin= 8 EnMin= -568.124329809713     IErMin= 8 ErrMin= 4.35D-05
 ErrMax= 4.35D-05 EMaxC= 1.00D-01 BMatC= 1.01D-06 BMatP= 5.73D-06
 IDIUse=1 WtCom= 1.00D+00 WtEn= 0.00D+00
 Coeff-Com: -0.334D-03 0.381D-04 0.492D-02 0.946D-02 0.306D-01 0.139D+00
 Coeff-Com:  0.332D+00 0.484D+00
 Coeff:     -0.334D-03 0.381D-04 0.492D-02 0.946D-02 0.306D-01 0.139D+00
 Coeff:      0.332D+00 0.484D+00
 Gap=     0.117 Goal=   None    Shift=    0.000
 RMSDP=4.99D-06 MaxDP=1.78D-04 DE=-4.23D-06 OVMax= 2.77D-04

 Cycle   9  Pass 1  IDiag  1:
 RMSU=  1.96D-06    CP:  9.87D-01  7.91D-01  5.59D-01  6.40D-01  4.77D-01
                    CP:  7.11D-01  6.10D-01  4.53D-01
 E= -568.124330536092     Delta-E=       -0.000000726379 Rises=F Damp=F
 DIIS: error= 2.01D-05 at cycle   9 NSaved=   9.
 NSaved= 9 IEnMin= 9 EnMin= -568.124330536092     IErMin= 9 ErrMin= 2.01D-05
 ErrMax= 2.01D-05 EMaxC= 1.00D-01 BMatC= 1.63D-07 BMatP= 1.01D-06
 IDIUse=1 WtCom= 1.00D+00 WtEn= 0.00D+00
 Coeff-Com: -0.132D-03 0.679D-04-0.321D-03-0.706D-03 0.483D-02 0.353D-01
 Coeff-Com:  0.135D+00 0.325D+00 0.501D+00
 Coeff:     -0.132D-03 0.679D-04-0.321D-03-0.706D-03 0.483D-02 0.353D-01
 Coeff:      0.135D+00 0.325D+00 0.501D+00
 Gap=     0.117 Goal=   None    Shift=    0.000
 RMSDP=1.75D-06 MaxDP=7.56D-05 DE=-7.26D-07 OVMax= 8.15D-05

 Cycle  10  Pass 1  IDiag  1:
 RMSU=  6.30D-07    CP:  9.87D-01  7.91D-01  5.59D-01  6.40D-01  4.77D-01
                    CP:  7.16D-01  6.29D-01  5.48D-01  5.61D-01
 E= -568.124330654063     Delta-E=       -0.000000117971 Rises=F Damp=F
 DIIS: error= 4.53D-06 at cycle  10 NSaved=  10.
 NSaved=10 IEnMin=10 EnMin= -568.124330654063     IErMin=10 ErrMin= 4.53D-06
 ErrMax= 4.53D-06 EMaxC= 1.00D-01 BMatC= 1.32D-08 BMatP= 1.63D-07
 IDIUse=1 WtCom= 1.00D+00 WtEn= 0.00D+00
 Coeff-Com: -0.618D-04 0.614D-04-0.541D-03-0.108D-02 0.741D-03 0.110D-01
 Coeff-Com:  0.578D-01 0.164D+00 0.305D+00 0.462D+00
 Coeff:     -0.618D-04 0.614D-04-0.541D-03-0.108D-02 0.741D-03 0.110D-01
 Coeff:      0.578D-01 0.164D+00 0.305D+00 0.462D+00
 Gap=     0.117 Goal=   None    Shift=    0.000
 RMSDP=5.59D-07 MaxDP=1.76D-05 DE=-1.18D-07 OVMax= 3.41D-05

 Cycle  11  Pass 1  IDiag  1:
 RMSU=  1.87D-07    CP:  9.87D-01  7.91D-01  5.59D-01  6.40D-01  4.77D-01
                    CP:  7.17D-01  6.31D-01  5.67D-01  6.00D-01  5.04D-01
 E= -568.124330664553     Delta-E=       -0.000000010490 Rises=F Damp=F
 DIIS: error= 1.32D-06 at cycle  11 NSaved=  11.
 NSaved=11 IEnMin=11 EnMin= -568.124330664553     IErMin=11 ErrMin= 1.32D-06
 ErrMax= 1.32D-06 EMaxC= 1.00D-01 BMatC= 5.11D-10 BMatP= 1.32D-08
 IDIUse=1 WtCom= 1.00D+00 WtEn= 0.00D+00
 Coeff-Com: -0.143D-04 0.208D-04-0.182D-03-0.313D-03-0.161D-03 0.472D-03
 Coeff-Com:  0.808D-02 0.300D-01 0.644D-01 0.191D+00 0.707D+00
 Coeff:     -0.143D-04 0.208D-04-0.182D-03-0.313D-03-0.161D-03 0.472D-03
 Coeff:      0.808D-02 0.300D-01 0.644D-01 0.191D+00 0.707D+00
 Gap=     0.117 Goal=   None    Shift=    0.000
 RMSDP=1.33D-07 MaxDP=4.37D-06 DE=-1.05D-08 OVMax= 9.23D-06

 Cycle  12  Pass 1  IDiag  1:
 RMSU=  5.52D-08    CP:  9.87D-01  7.91D-01  5.59D-01  6.40D-01  4.77D-01
                    CP:  7.17D-01  6.32D-01  5.67D-01  6.06D-01  5.92D-01
                    CP:  8.07D-01
 E= -568.124330664929     Delta-E=       -0.000000000377 Rises=F Damp=F
 DIIS: error= 3.34D-07 at cycle  12 NSaved=  12.
 NSaved=12 IEnMin=12 EnMin= -568.124330664929     IErMin=12 ErrMin= 3.34D-07
 ErrMax= 3.34D-07 EMaxC= 1.00D-01 BMatC= 7.30D-11 BMatP= 5.11D-10
 IDIUse=1 WtCom= 1.00D+00 WtEn= 0.00D+00
 Coeff-Com: -0.472D-05 0.959D-05-0.732D-04-0.117D-03-0.143D-03-0.433D-03
 Coeff-Com:  0.109D-02 0.706D-02 0.177D-01 0.793D-01 0.398D+00 0.497D+00
 Coeff:     -0.472D-05 0.959D-05-0.732D-04-0.117D-03-0.143D-03-0.433D-03
 Coeff:      0.109D-02 0.706D-02 0.177D-01 0.793D-01 0.398D+00 0.497D+00
 Gap=     0.117 Goal=   None    Shift=    0.000
 RMSDP=4.94D-08 MaxDP=1.24D-06 DE=-3.77D-10 OVMax= 2.81D-06

 Cycle  13  Pass 1  IDiag  1:
 RMSU=  2.17D-08    CP:  9.87D-01  7.91D-01  5.59D-01  6.40D-01  4.77D-01
                    CP:  7.17D-01  6.32D-01  5.68D-01  6.07D-01  5.86D-01
                    CP:  8.65D-01  5.83D-01
 E= -568.124330664986     Delta-E=       -0.000000000056 Rises=F Damp=F
 DIIS: error= 9.45D-08 at cycle  13 NSaved=  13.
 NSaved=13 IEnMin=13 EnMin= -568.124330664986     IErMin=13 ErrMin= 9.45D-08
 ErrMax= 9.45D-08 EMaxC= 1.00D-01 BMatC= 5.59D-12 BMatP= 7.30D-11
 IDIUse=1 WtCom= 1.00D+00 WtEn= 0.00D+00
 Coeff-Com: -0.114D-06 0.130D-05-0.306D-05-0.859D-06-0.310D-04-0.263D-03
 Coeff-Com: -0.804D-03-0.165D-02-0.236D-02 0.587D-02 0.732D-01 0.244D+00
 Coeff-Com:  0.682D+00
 Coeff:     -0.114D-06 0.130D-05-0.306D-05-0.859D-06-0.310D-04-0.263D-03
 Coeff:     -0.804D-03-0.165D-02-0.236D-02 0.587D-02 0.732D-01 0.244D+00
 Coeff:      0.682D+00
 Gap=     0.117 Goal=   None    Shift=    0.000
 RMSDP=1.48D-08 MaxDP=4.36D-07 DE=-5.62D-11 OVMax= 8.43D-07

 Cycle  14  Pass 1  IDiag  1:
 RMSU=  5.76D-09    CP:  9.87D-01  7.91D-01  5.59D-01  6.40D-01  4.77D-01
                    CP:  7.17D-01  6.32D-01  5.68D-01  6.08D-01  5.92D-01
                    CP:  8.73D-01  6.92D-01  8.33D-01
 E= -568.124330664995     Delta-E=       -0.000000000009 Rises=F Damp=F
 DIIS: error= 4.14D-08 at cycle  14 NSaved=  14.
 NSaved=14 IEnMin=14 EnMin= -568.124330664995     IErMin=14 ErrMin= 4.14D-08
 ErrMax= 4.14D-08 EMaxC= 1.00D-01 BMatC= 5.47D-13 BMatP= 5.59D-12
 IDIUse=1 WtCom= 1.00D+00 WtEn= 0.00D+00
 Coeff-Com:  0.989D-07 0.357D-06 0.146D-05 0.372D-05-0.905D-05-0.108D-03
 Coeff-Com: -0.422D-03-0.107D-02-0.182D-02-0.310D-03 0.215D-01 0.103D+00
 Coeff-Com:  0.351D+00 0.528D+00
 Coeff:      0.989D-07 0.357D-06 0.146D-05 0.372D-05-0.905D-05-0.108D-03
 Coeff:     -0.422D-03-0.107D-02-0.182D-02-0.310D-03 0.215D-01 0.103D+00
 Coeff:      0.351D+00 0.528D+00
 Gap=     0.117 Goal=   None    Shift=    0.000
 RMSDP=4.86D-09 MaxDP=2.21D-07 DE=-9.32D-12 OVMax= 3.35D-07

 Error on total polarization charges =  0.03126
 SCF Done:  E(RM06L) =  -568.124330665     A.U. after   14 cycles
             Convg  =    0.4858D-08             -V/T =  2.0078
 KE= 5.637375181296D+02 PE=-2.407626571833D+03 EE= 7.457009099679D+02
 SMD-CDS (non-electrostatic) energy       (kcal/mol) =       2.57
 (included in total energy above)
 Leave Link  502 at Sat May 27 21:35:00 2023, MaxMem=   33554432 cpu:     233.7
 (Enter /local/share/g09/l601.exe)
 Copying SCF densities to generalized density rwf, IOpCl= 0 IROHF=0.

 **********************************************************************

            Population analysis using the SCF density.

 **********************************************************************

 Orbital symmetries:
       Occupied  (A) (A) (A) (A) (A) (A) (A) (A) (A) (A) (A) (A)
                 (A) (A) (A) (A) (A) (A) (A) (A) (A) (A) (A) (A)
                 (A) (A) (A) (A) (A) (A) (A) (A) (A) (A) (A) (A)
                 (A) (A) (A) (A)
       Virtual   (A) (A) (A) (A) (A) (A) (A) (A) (A) (A) (A) (A)
                 (A) (A) (A) (A) (A) (A) (A) (A) (A) (A) (A) (A)
                 (A) (A) (A) (A) (A) (A) (A) (A) (A) (A) (A) (A)
                 (A) (A) (A) (A) (A) (A) (A) (A) (A) (A) (A) (A)
                 (A) (A) (A) (A) (A) (A) (A) (A) (A) (A) (A) (A)
                 (A) (A) (A) (A) (A) (A) (A) (A) (A) (A) (A) (A)
                 (A) (A) (A) (A) (A) (A) (A) (A) (A) (A) (A) (A)
                 (A) (A) (A) (A) (A) (A) (A) (A) (A) (A) (A) (A)
                 (A) (A) (A) (A) (A) (A) (A) (A) (A) (A) (A) (A)
                 (A) (A) (A) (A) (A) (A) (A) (A) (A) (A) (A) (A)
                 (A) (A) (A) (A) (A) (A) (A) (A) (A) (A) (A) (A)
                 (A) (A) (A) (A) (A) (A) (A) (A) (A) (A) (A) (A)
                 (A) (A) (A) (A) (A) (A) (A) (A) (A) (A) (A)
 The electronic state is 1-A.
 Alpha  occ. eigenvalues --  -19.07011 -19.05812 -19.01803 -18.92128 -14.14983
 Alpha  occ. eigenvalues --  -14.12765 -10.15451 -10.12122 -10.06315 -10.04903
 Alpha  occ. eigenvalues --   -1.11183  -1.03048  -0.92105  -0.82904  -0.82737
 Alpha  occ. eigenvalues --   -0.76552  -0.70344  -0.67329  -0.54004  -0.48969
 Alpha  occ. eigenvalues --   -0.48399  -0.47577  -0.44382  -0.42334  -0.39379
 Alpha  occ. eigenvalues --   -0.38607  -0.38283  -0.36500  -0.36300  -0.34442
 Alpha  occ. eigenvalues --   -0.33353  -0.32835  -0.30753  -0.27609  -0.23588
 Alpha  occ. eigenvalues --   -0.23074  -0.22781  -0.22037  -0.16521  -0.14332
 Alpha virt. eigenvalues --   -0.02643   0.00525   0.03004   0.05704   0.10531
 Alpha virt. eigenvalues --    0.12989   0.13967   0.15266   0.16864   0.17955
 Alpha virt. eigenvalues --    0.18207   0.18762   0.19094   0.21531   0.23756
 Alpha virt. eigenvalues --    0.27097   0.28215   0.39579   0.42847   0.52256
 Alpha virt. eigenvalues --    0.55371   0.55924   0.56292   0.56896   0.59029
 Alpha virt. eigenvalues --    0.59749   0.61279   0.62363   0.62883   0.64525
 Alpha virt. eigenvalues --    0.64909   0.69953   0.72362   0.73366   0.75155
 Alpha virt. eigenvalues --    0.77808   0.78494   0.81040   0.81885   0.83509
 Alpha virt. eigenvalues --    0.84840   0.85194   0.86428   0.86812   0.87375
 Alpha virt. eigenvalues --    0.89152   0.90993   0.91839   0.93578   0.94825
 Alpha virt. eigenvalues --    0.98090   0.99634   1.01556   1.02633   1.05176
 Alpha virt. eigenvalues --    1.05989   1.09668   1.14217   1.17548   1.21863
 Alpha virt. eigenvalues --    1.26358   1.26663   1.28463   1.28943   1.33281
 Alpha virt. eigenvalues --    1.35076   1.37137   1.39911   1.47658   1.48605
 Alpha virt. eigenvalues --    1.49595   1.55038   1.57227   1.58404   1.60013
 Alpha virt. eigenvalues --    1.60929   1.62180   1.62529   1.64098   1.71970
 Alpha virt. eigenvalues --    1.74906   1.77059   1.78145   1.82206   1.83674
 Alpha virt. eigenvalues --    1.89179   1.89945   1.91388   1.93178   1.97350
 Alpha virt. eigenvalues --    2.00711   2.02180   2.03120   2.03373   2.03742
 Alpha virt. eigenvalues --    2.05243   2.06282   2.06988   2.12744   2.14642
 Alpha virt. eigenvalues --    2.22453   2.23037   2.25127   2.27774   2.31901
 Alpha virt. eigenvalues --    2.32559   2.33850   2.38012   2.40756   2.43355
 Alpha virt. eigenvalues --    2.44844   2.48401   2.50921   2.51089   2.58604
 Alpha virt. eigenvalues --    2.59397   2.60572   2.66182   2.68280   2.71872
 Alpha virt. eigenvalues --    2.71934   2.72112   2.76229   2.79918   2.81612
 Alpha virt. eigenvalues --    2.83184   2.87291   2.91517   2.94576   2.95153
 Alpha virt. eigenvalues --    3.02861   3.05598   3.13330   3.19154   3.21713
 Alpha virt. eigenvalues --    3.22796   3.33678   3.33923   3.44013   3.48816
 Alpha virt. eigenvalues --    3.49546   3.50053   3.51405   3.52800   3.55721
 Alpha virt. eigenvalues --    3.69660   3.84988   4.05263   4.07840   4.14123
 Alpha virt. eigenvalues --    4.16150   4.32518   4.35793   4.68641   4.69708
     Molecular Orbital Coefficients:
                           1         2         3         4         5
                           O         O         O         O         O
     Eigenvalues --   -19.07011 -19.05812 -19.01803 -18.92128 -14.14983
   1 1   C  1S          0.00001   0.00000   0.00001   0.00000  -0.00001
   2        2S          0.00013   0.00001   0.00001  -0.00003  -0.00006
   3        2PX        -0.00002   0.00001   0.00005   0.00000  -0.00003
   4        2PY        -0.00002   0.00002  -0.00002  -0.00002  -0.00005
   5        2PZ        -0.00002  -0.00001   0.00002   0.00002   0.00005
   6        3S          0.00003  -0.00044  -0.00011   0.00026   0.00112
   7        3PX         0.00019  -0.00001  -0.00014   0.00005  -0.00037
   8        3PY         0.00025   0.00000   0.00021  -0.00019  -0.00055
   9        3PZ        -0.00002  -0.00019  -0.00016  -0.00020   0.00004
  10        4XX        -0.00002   0.00000   0.00003   0.00001   0.00003
  11        4YY        -0.00005   0.00000   0.00001   0.00002   0.00010
  12        4ZZ        -0.00001   0.00000   0.00003  -0.00001  -0.00007
  13        4XY        -0.00005   0.00000  -0.00002  -0.00002   0.00009
  14        4XZ         0.00003   0.00000   0.00003   0.00000  -0.00005
  15        4YZ         0.00005  -0.00001  -0.00001   0.00000  -0.00006
  16 2   C  1S          0.00001   0.00000   0.00001   0.00002   0.00004
  17        2S          0.00024   0.00008   0.00000   0.00006   0.00021
  18        2PX        -0.00014   0.00000   0.00005   0.00005  -0.00004
  19        2PY        -0.00019   0.00000  -0.00001  -0.00003  -0.00003
  20        2PZ        -0.00006   0.00004   0.00000  -0.00001  -0.00048
  21        3S         -0.00003   0.00002  -0.00026  -0.00057   0.00247
  22        3PX         0.00024   0.00027  -0.00006   0.00006   0.00005
  23        3PY         0.00032   0.00041  -0.00003   0.00045  -0.00004
  24        3PZ         0.00055  -0.00045  -0.00049   0.00007   0.00315
  25        4XX        -0.00004  -0.00003   0.00005   0.00005  -0.00003
  26        4YY        -0.00005  -0.00006   0.00003   0.00003  -0.00004
  27        4ZZ         0.00010  -0.00001   0.00000   0.00004  -0.00089
  28        4XY        -0.00001  -0.00005   0.00001  -0.00004  -0.00002
  29        4XZ        -0.00002   0.00002  -0.00001  -0.00001  -0.00012
  30        4YZ        -0.00004   0.00003   0.00000  -0.00001  -0.00015
  31 3   N  1S          0.00001  -0.00003  -0.00001  -0.00001   0.99399
  32        2S          0.00005  -0.00005  -0.00005  -0.00003   0.03129
  33        2PX         0.00002   0.00001   0.00002   0.00000  -0.00087
  34        2PY         0.00003   0.00001  -0.00002   0.00001  -0.00124
  35        2PZ         0.00005  -0.00003   0.00000   0.00000  -0.00097
  36        3S         -0.00048   0.00080   0.00051   0.00017  -0.00487
  37        3PX        -0.00002  -0.00019  -0.00007  -0.00002   0.00069
  38        3PY        -0.00003  -0.00028  -0.00001  -0.00015   0.00098
  39        3PZ         0.00025   0.00019  -0.00022  -0.00002   0.00186
  40        4XX         0.00000  -0.00005  -0.00001  -0.00001  -0.00493
  41        4YY         0.00001  -0.00005  -0.00001   0.00000  -0.00480
  42        4ZZ        -0.00004  -0.00009   0.00001  -0.00001  -0.00445
  43        4XY         0.00000   0.00000   0.00001   0.00000   0.00018
  44        4XZ        -0.00004  -0.00001   0.00000  -0.00001  -0.00009
  45        4YZ        -0.00006  -0.00001   0.00000   0.00002  -0.00015
  46 4   O  1S          0.99366  -0.00047   0.00000  -0.00001  -0.00001
  47        2S          0.02504  -0.00003  -0.00001  -0.00009  -0.00006
  48        2PX         0.00016  -0.00005  -0.00001   0.00000  -0.00004
  49        2PY         0.00018  -0.00007   0.00001  -0.00001  -0.00006
  50        2PZ         0.00104   0.00014  -0.00001   0.00000   0.00000
  51        3S          0.00531   0.00037   0.00000   0.00055   0.00002
  52        3PX         0.00019  -0.00010   0.00000   0.00015   0.00024
  53        3PY         0.00031  -0.00015  -0.00007   0.00015   0.00036
  54        3PZ        -0.00086   0.00026   0.00008   0.00006  -0.00050
  55        4XX        -0.00567  -0.00003  -0.00001  -0.00003  -0.00005
  56        4YY        -0.00573   0.00002  -0.00003  -0.00004   0.00000
  57        4ZZ        -0.00586   0.00009   0.00000  -0.00005  -0.00009
  58        4XY        -0.00009   0.00008   0.00000   0.00001   0.00008
  59        4XZ         0.00006  -0.00005   0.00000   0.00001  -0.00002
  60        4YZ         0.00010  -0.00009   0.00000   0.00001  -0.00003
  61 5   O  1S          0.00041   0.99365   0.00000  -0.00001  -0.00002
  62        2S         -0.00005   0.02494   0.00000  -0.00002  -0.00008
  63        2PX         0.00006  -0.00021   0.00000  -0.00001  -0.00002
  64        2PY         0.00009  -0.00024   0.00000   0.00000  -0.00003
  65        2PZ        -0.00017  -0.00113   0.00000   0.00000   0.00001
  66        3S          0.00056   0.00567  -0.00004   0.00008   0.00036
  67        3PX         0.00007   0.00001   0.00000   0.00002   0.00008
  68        3PY         0.00011  -0.00001   0.00000   0.00002   0.00014
  69        3PZ        -0.00034   0.00069   0.00003   0.00000  -0.00023
  70        4XX        -0.00006  -0.00572   0.00000  -0.00002  -0.00008
  71        4YY         0.00002  -0.00571   0.00000  -0.00002  -0.00005
  72        4ZZ         0.00013  -0.00589  -0.00001  -0.00001  -0.00002
  73        4XY         0.00012   0.00003   0.00000   0.00000   0.00004
  74        4XZ        -0.00006   0.00013   0.00000   0.00000  -0.00002
  75        4YZ        -0.00010   0.00019   0.00000   0.00000  -0.00003
  76 6   O  1S          0.00000   0.00000   0.00003   0.99368   0.00001
  77        2S         -0.00001  -0.00001  -0.00002   0.02489   0.00002
  78        2PX        -0.00001   0.00000   0.00008   0.00043  -0.00001
  79        2PY         0.00000   0.00000   0.00014   0.00059   0.00001
  80        2PZ         0.00000   0.00000   0.00007   0.00030   0.00001
  81        3S          0.00002   0.00003   0.00018   0.00533  -0.00008
  82        3PX         0.00003   0.00000   0.00022  -0.00019   0.00001
  83        3PY         0.00002   0.00001   0.00020  -0.00031  -0.00002
  84        3PZ         0.00000   0.00001   0.00011  -0.00017  -0.00004
  85        4XX         0.00001  -0.00001   0.00004  -0.00572   0.00002
  86        4YY         0.00001  -0.00001   0.00012  -0.00581   0.00002
  87        4ZZ         0.00000  -0.00001  -0.00002  -0.00572   0.00002
  88        4XY         0.00000   0.00000   0.00016  -0.00014   0.00000
  89        4XZ         0.00000   0.00000   0.00009  -0.00006   0.00000
  90        4YZ         0.00000   0.00000   0.00012  -0.00008  -0.00001
  91 7   O  1S          0.00000   0.00000   0.99370  -0.00006   0.00000
  92        2S          0.00001   0.00000   0.02494   0.00004   0.00000
  93        2PX         0.00000   0.00000   0.00052  -0.00009  -0.00001
  94        2PY         0.00000   0.00000  -0.00079  -0.00014   0.00000
  95        2PZ         0.00000   0.00000  -0.00024  -0.00007   0.00000
  96        3S         -0.00004  -0.00001   0.00511   0.00006   0.00003
  97        3PX         0.00001   0.00001   0.00002   0.00009   0.00005
  98        3PY         0.00001   0.00001   0.00071  -0.00014  -0.00004
  99        3PZ         0.00001   0.00000   0.00028  -0.00005  -0.00002
 100        4XX         0.00000   0.00000  -0.00565   0.00008   0.00002
 101        4YY         0.00000   0.00000  -0.00571   0.00012   0.00001
 102        4ZZ         0.00000   0.00000  -0.00556   0.00001   0.00001
 103        4XY         0.00000   0.00000  -0.00006   0.00005   0.00000
 104        4XZ         0.00000   0.00000  -0.00005   0.00004   0.00000
 105        4YZ        -0.00001   0.00000  -0.00010   0.00007   0.00000
 106 8   C  1S          0.00000   0.00000   0.00001   0.00000   0.00000
 107        2S          0.00000   0.00000   0.00028   0.00007   0.00000
 108        2PX         0.00000   0.00000  -0.00025   0.00005   0.00001
 109        2PY         0.00000   0.00000   0.00004  -0.00001   0.00000
 110        2PZ         0.00000   0.00000  -0.00002   0.00000   0.00000
 111        3S          0.00001   0.00000   0.00008  -0.00013  -0.00005
 112        3PX         0.00000   0.00000   0.00042   0.00024   0.00003
 113        3PY         0.00003   0.00000  -0.00039   0.00010   0.00003
 114        3PZ         0.00001   0.00000  -0.00010   0.00008   0.00002
 115        4XX         0.00000   0.00000  -0.00010  -0.00010  -0.00002
 116        4YY         0.00000   0.00000   0.00007  -0.00004  -0.00001
 117        4ZZ         0.00000   0.00000  -0.00002  -0.00003   0.00000
 118        4XY         0.00000   0.00000   0.00003  -0.00003   0.00000
 119        4XZ         0.00000   0.00000   0.00000  -0.00003   0.00000
 120        4YZ         0.00000   0.00000   0.00006  -0.00001   0.00000
 121 9   N  1S          0.00000   0.00000   0.00001  -0.00001   0.00000
 122        2S          0.00000   0.00000   0.00006  -0.00003   0.00000
 123        2PX         0.00000   0.00000   0.00003   0.00001   0.00000
 124        2PY         0.00000   0.00000  -0.00001   0.00002   0.00000
 125        2PZ         0.00000   0.00000   0.00000   0.00001   0.00000
 126        3S          0.00002   0.00000  -0.00049   0.00038   0.00004
 127        3PX        -0.00001   0.00000   0.00008  -0.00017  -0.00002
 128        3PY         0.00000   0.00000  -0.00020  -0.00013   0.00001
 129        3PZ         0.00000   0.00000  -0.00007  -0.00008   0.00000
 130        4XX         0.00000   0.00000  -0.00004  -0.00002   0.00000
 131        4YY         0.00000   0.00000   0.00002  -0.00005   0.00000
 132        4ZZ         0.00000   0.00000   0.00002  -0.00004   0.00000
 133        4XY         0.00000   0.00000   0.00007   0.00001   0.00000
 134        4XZ         0.00000   0.00000   0.00002   0.00001   0.00000
 135        4YZ         0.00000   0.00000   0.00001   0.00000   0.00000
 136 10  C  1S          0.00000   0.00000   0.00001   0.00000   0.00000
 137        2S          0.00000   0.00000   0.00011  -0.00001   0.00000
 138        2PX         0.00000   0.00000  -0.00002   0.00001   0.00000
 139        2PY         0.00000   0.00000   0.00002   0.00000   0.00000
 140        2PZ         0.00000   0.00000   0.00000   0.00000   0.00000
 141        3S         -0.00003   0.00000   0.00002  -0.00008  -0.00001
 142        3PX         0.00001   0.00000   0.00026  -0.00007   0.00000
 143        3PY         0.00001   0.00000   0.00005   0.00004   0.00001
 144        3PZ         0.00000   0.00000   0.00008   0.00000   0.00000
 145        4XX         0.00000   0.00000  -0.00006   0.00000   0.00000
 146        4YY         0.00000   0.00000  -0.00002   0.00001   0.00000
 147        4ZZ         0.00000   0.00000  -0.00001   0.00000   0.00000
 148        4XY         0.00000   0.00000  -0.00006   0.00001   0.00000
 149        4XZ         0.00000   0.00000  -0.00003   0.00000   0.00000
 150        4YZ         0.00000   0.00000  -0.00002   0.00001   0.00000
 151 11  H  1S          0.00005   0.00000  -0.00004  -0.00002  -0.00001
 152        2S         -0.00003  -0.00001  -0.00019  -0.00003  -0.00010
 153        3PX        -0.00003   0.00000  -0.00002  -0.00001   0.00000
 154        3PY        -0.00002   0.00001   0.00001   0.00001   0.00001
 155        3PZ         0.00000   0.00000  -0.00002   0.00001   0.00003
 156 12  H  1S         -0.00002   0.00002   0.00004   0.00000   0.00000
 157        2S         -0.00023   0.00008  -0.00006   0.00005   0.00011
 158        3PX         0.00001   0.00000   0.00002  -0.00001   0.00002
 159        3PY         0.00001   0.00000  -0.00001   0.00000   0.00002
 160        3PZ        -0.00001   0.00000   0.00002   0.00000   0.00000
 161 13  H  1S          0.00005   0.00000   0.00006   0.00003  -0.00002
 162        2S         -0.00004  -0.00001  -0.00002  -0.00038  -0.00010
 163        3PX        -0.00001   0.00001   0.00001   0.00001   0.00001
 164        3PY        -0.00003   0.00001  -0.00001  -0.00002   0.00000
 165        3PZ         0.00000   0.00000   0.00001  -0.00002   0.00003
 166 14  H  1S         -0.00004  -0.00006  -0.00001  -0.00002  -0.00023
 167        2S         -0.00007  -0.00073   0.00003  -0.00005   0.00034
 168        3PX        -0.00001   0.00003   0.00001   0.00000  -0.00030
 169        3PY        -0.00001   0.00005  -0.00001   0.00000  -0.00045
 170        3PZ         0.00003   0.00007   0.00000   0.00000   0.00030
 171 15  H  1S         -0.00011   0.00017   0.00001   0.00001  -0.00001
 172        2S         -0.00022  -0.00056   0.00000   0.00001   0.00002
 173        3PX        -0.00006  -0.00016   0.00000   0.00000   0.00001
 174        3PY        -0.00009  -0.00022   0.00000   0.00001   0.00001
 175        3PZ         0.00003  -0.00016   0.00000   0.00000   0.00001
 176 16  H  1S          0.00000   0.00000  -0.00002   0.00001   0.00000
 177        2S          0.00000   0.00000  -0.00019   0.00005   0.00000
 178        3PX         0.00000   0.00000   0.00001   0.00000   0.00000
 179        3PY         0.00000   0.00000   0.00001   0.00001   0.00000
 180        3PZ         0.00000   0.00000   0.00000   0.00000   0.00000
 181 17  H  1S          0.00000   0.00000   0.00004   0.00000   0.00000
 182        2S          0.00000   0.00000  -0.00002  -0.00001   0.00000
 183        3PX         0.00000   0.00000  -0.00003   0.00001   0.00000
 184        3PY         0.00000   0.00000   0.00000   0.00000   0.00000
 185        3PZ         0.00000   0.00000  -0.00001   0.00000   0.00000
 186 18  H  1S          0.00000   0.00000   0.00005  -0.00001   0.00000
 187        2S          0.00000   0.00000  -0.00006   0.00000   0.00000
 188        3PX         0.00000   0.00000  -0.00003   0.00001   0.00000
 189        3PY         0.00000   0.00000   0.00000   0.00000   0.00000
 190        3PZ         0.00000   0.00000   0.00000   0.00000   0.00000
 191 19  H  1S          0.00000   0.00000  -0.00001  -0.00003   0.00000
 192        2S         -0.00001   0.00000  -0.00007  -0.00042  -0.00001
 193        3PX         0.00000   0.00000   0.00000   0.00004   0.00000
 194        3PY         0.00000   0.00000  -0.00002  -0.00004   0.00000
 195        3PZ         0.00000   0.00000  -0.00001  -0.00001   0.00000
                           6         7         8         9        10
                           O         O         O         O         O
     Eigenvalues --   -14.12765 -10.15451 -10.12122 -10.06315 -10.04903
   1 1   C  1S          0.00000   0.00092   0.00003   0.99439   0.00001
   2        2S          0.00000  -0.00028   0.00002   0.04044  -0.00001
   3        2PX         0.00000   0.00016   0.00005  -0.00011   0.00000
   4        2PY         0.00000   0.00023  -0.00002  -0.00013   0.00000
   5        2PZ         0.00000  -0.00039   0.00002   0.00010   0.00000
   6        3S          0.00003   0.00593  -0.00017  -0.02123   0.00007
   7        3PX         0.00001  -0.00079  -0.00014   0.00059   0.00003
   8        3PY        -0.00001  -0.00135   0.00025   0.00109   0.00000
   9        3PZ         0.00000   0.00251  -0.00009  -0.00164   0.00000
  10        4XX         0.00000  -0.00033   0.00003  -0.00413  -0.00001
  11        4YY         0.00000  -0.00043   0.00001  -0.00415   0.00000
  12        4ZZ         0.00000  -0.00054   0.00004  -0.00436  -0.00001
  13        4XY         0.00000  -0.00016  -0.00002  -0.00002   0.00000
  14        4XZ         0.00000   0.00018   0.00003   0.00011   0.00000
  15        4YZ         0.00000   0.00026  -0.00001   0.00012   0.00000
  16 2   C  1S          0.00000   0.99410  -0.00003  -0.00120   0.00000
  17        2S          0.00000   0.03955   0.00001  -0.00021   0.00000
  18        2PX         0.00000  -0.00052   0.00006  -0.00012  -0.00001
  19        2PY         0.00000  -0.00084   0.00000  -0.00019   0.00000
  20        2PZ         0.00000  -0.00022   0.00000   0.00036   0.00000
  21        3S         -0.00002  -0.01051  -0.00036   0.00544   0.00000
  22        3PX         0.00000  -0.00193  -0.00018   0.00176   0.00003
  23        3PY         0.00002  -0.00252  -0.00015   0.00258   0.00003
  24        3PZ         0.00003   0.00380  -0.00062  -0.00212   0.00002
  25        4XX         0.00000  -0.00522   0.00006  -0.00027  -0.00001
  26        4YY         0.00000  -0.00490   0.00004  -0.00040  -0.00001
  27        4ZZ         0.00000  -0.00430   0.00000  -0.00072   0.00000
  28        4XY         0.00000   0.00054   0.00002  -0.00019   0.00000
  29        4XZ         0.00000   0.00016  -0.00001   0.00017   0.00000
  30        4YZ         0.00000   0.00020   0.00000   0.00027   0.00000
  31 3   N  1S          0.00000  -0.00020  -0.00001  -0.00001   0.00000
  32        2S          0.00000  -0.00022  -0.00007  -0.00005   0.00000
  33        2PX         0.00000   0.00010   0.00001  -0.00003   0.00000
  34        2PY         0.00000   0.00014  -0.00001  -0.00005   0.00000
  35        2PZ         0.00000   0.00065   0.00000  -0.00003   0.00000
  36        3S         -0.00001  -0.00109   0.00070  -0.00010  -0.00001
  37        3PX         0.00000   0.00096  -0.00003  -0.00033  -0.00001
  38        3PY        -0.00001   0.00128   0.00001  -0.00045  -0.00001
  39        3PZ         0.00001   0.00033  -0.00032   0.00016   0.00001
  40        4XX         0.00000  -0.00001  -0.00003  -0.00005   0.00000
  41        4YY         0.00000  -0.00019  -0.00003   0.00000   0.00000
  42        4ZZ         0.00000  -0.00045   0.00000   0.00008   0.00000
  43        4XY         0.00000  -0.00028   0.00000   0.00008   0.00000
  44        4XZ         0.00000  -0.00011   0.00000   0.00009   0.00000
  45        4YZ         0.00000  -0.00012   0.00000   0.00012   0.00000
  46 4   O  1S          0.00000   0.00005   0.00000  -0.00007   0.00000
  47        2S          0.00000   0.00050   0.00002  -0.00035  -0.00001
  48        2PX         0.00000  -0.00015  -0.00001  -0.00007   0.00000
  49        2PY         0.00000  -0.00020   0.00001  -0.00010   0.00000
  50        2PZ         0.00000   0.00000  -0.00001   0.00007   0.00000
  51        3S          0.00003  -0.00196  -0.00014   0.00125   0.00005
  52        3PX         0.00001  -0.00072  -0.00002   0.00062   0.00001
  53        3PY         0.00001  -0.00107  -0.00012   0.00091   0.00002
  54        3PZ         0.00000  -0.00159   0.00009  -0.00041   0.00000
  55        4XX         0.00000   0.00014   0.00000  -0.00020   0.00000
  56        4YY         0.00000  -0.00036  -0.00002  -0.00011   0.00000
  57        4ZZ         0.00000   0.00006   0.00001  -0.00022  -0.00001
  58        4XY         0.00000  -0.00079  -0.00001   0.00016   0.00000
  59        4XZ         0.00000  -0.00024   0.00000   0.00002   0.00000
  60        4YZ         0.00000  -0.00033   0.00000   0.00002   0.00000
  61 5   O  1S          0.00000  -0.00003   0.00000  -0.00005   0.00000
  62        2S          0.00000  -0.00022   0.00001  -0.00022   0.00000
  63        2PX         0.00000  -0.00001   0.00000  -0.00002   0.00000
  64        2PY         0.00000  -0.00001   0.00000  -0.00002   0.00000
  65        2PZ         0.00000  -0.00002   0.00000   0.00002   0.00000
  66        3S          0.00000   0.00092  -0.00007   0.00109   0.00000
  67        3PX         0.00000   0.00028  -0.00001   0.00023   0.00000
  68        3PY         0.00000   0.00042  -0.00001   0.00035   0.00000
  69        3PZ         0.00000  -0.00036   0.00003  -0.00034   0.00000
  70        4XX         0.00000  -0.00006   0.00001  -0.00016   0.00000
  71        4YY         0.00000   0.00005   0.00001  -0.00013   0.00000
  72        4ZZ         0.00000  -0.00008   0.00000  -0.00008   0.00000
  73        4XY         0.00000   0.00015   0.00000   0.00004   0.00000
  74        4XZ         0.00000  -0.00009   0.00001  -0.00004   0.00000
  75        4YZ         0.00000  -0.00013   0.00000  -0.00006   0.00000
  76 6   O  1S          0.00000  -0.00005  -0.00001   0.00001  -0.00005
  77        2S         -0.00002  -0.00015  -0.00013   0.00006  -0.00022
  78        2PX         0.00000   0.00011   0.00000   0.00000  -0.00003
  79        2PY        -0.00001  -0.00007   0.00001  -0.00001  -0.00002
  80        2PZ        -0.00001  -0.00004   0.00000  -0.00003  -0.00001
  81        3S          0.00016   0.00068   0.00043  -0.00027   0.00107
  82        3PX         0.00000  -0.00023   0.00044   0.00000   0.00033
  83        3PY         0.00019   0.00025   0.00022  -0.00008   0.00034
  84        3PZ         0.00008   0.00013   0.00016   0.00007   0.00019
  85        4XX        -0.00003  -0.00015   0.00013   0.00005  -0.00011
  86        4YY         0.00001  -0.00017  -0.00004   0.00001  -0.00010
  87        4ZZ        -0.00002  -0.00021  -0.00003   0.00003  -0.00016
  88        4XY         0.00003   0.00000   0.00018   0.00000   0.00005
  89        4XZ         0.00001   0.00000   0.00011  -0.00001   0.00004
  90        4YZ         0.00003   0.00003   0.00004   0.00001   0.00005
  91 7   O  1S         -0.00002   0.00001   0.00006   0.00000  -0.00007
  92        2S         -0.00011   0.00009   0.00058   0.00003  -0.00034
  93        2PX        -0.00006   0.00006  -0.00024   0.00005  -0.00010
  94        2PY        -0.00001  -0.00001  -0.00002  -0.00002  -0.00008
  95        2PZ        -0.00002  -0.00002  -0.00004   0.00003  -0.00004
  96        3S          0.00049  -0.00052  -0.00271  -0.00013   0.00120
  97        3PX         0.00044  -0.00026  -0.00199  -0.00029   0.00099
  98        3PY         0.00049   0.00018   0.00119   0.00003   0.00045
  99        3PZ         0.00026   0.00010   0.00018  -0.00011   0.00031
 100        4XX         0.00003  -0.00007  -0.00087  -0.00007   0.00000
 101        4YY        -0.00013   0.00003   0.00030   0.00000  -0.00022
 102        4ZZ        -0.00011   0.00002   0.00061   0.00000  -0.00028
 103        4XY         0.00009   0.00000   0.00028   0.00002  -0.00001
 104        4XZ         0.00006  -0.00002  -0.00015   0.00001   0.00004
 105        4YZ         0.00001   0.00001  -0.00014   0.00002   0.00003
 106 8   C  1S          0.00003   0.00004   0.99409  -0.00001  -0.00139
 107        2S          0.00021   0.00000   0.03958  -0.00001  -0.00026
 108        2PX        -0.00014  -0.00007  -0.00089  -0.00006  -0.00016
 109        2PY         0.00041   0.00002   0.00006   0.00001  -0.00032
 110        2PZ         0.00014   0.00000  -0.00011  -0.00001  -0.00015
 111        3S          0.00252   0.00028  -0.01019   0.00018   0.00506
 112        3PX         0.00106  -0.00028  -0.00319  -0.00017   0.00253
 113        3PY        -0.00284  -0.00018  -0.00265  -0.00001   0.00216
 114        3PZ        -0.00098  -0.00016  -0.00150   0.00004   0.00123
 115        4XX        -0.00022   0.00009  -0.00436   0.00008  -0.00044
 116        4YY        -0.00067   0.00002  -0.00467   0.00002  -0.00063
 117        4ZZ        -0.00009   0.00001  -0.00547   0.00001  -0.00026
 118        4XY         0.00042  -0.00002  -0.00047  -0.00002  -0.00018
 119        4XZ         0.00014   0.00001   0.00001   0.00000  -0.00012
 120        4YZ        -0.00023   0.00001   0.00035   0.00001  -0.00024
 121 9   N  1S          0.99401   0.00001  -0.00020   0.00000  -0.00002
 122        2S          0.03120   0.00003  -0.00024   0.00001  -0.00012
 123        2PX        -0.00172   0.00000   0.00032   0.00000  -0.00005
 124        2PY         0.00065  -0.00001  -0.00056  -0.00001  -0.00002
 125        2PZ         0.00001  -0.00001  -0.00018   0.00000  -0.00001
 126        3S         -0.00504  -0.00028   0.00013  -0.00003  -0.00009
 127        3PX         0.00166   0.00014   0.00148   0.00005  -0.00038
 128        3PY        -0.00152   0.00000   0.00028   0.00002  -0.00005
 129        3PZ        -0.00037   0.00004   0.00032  -0.00002  -0.00009
 130        4XX        -0.00466   0.00000  -0.00044   0.00000   0.00006
 131        4YY        -0.00450   0.00001  -0.00036   0.00000   0.00004
 132        4ZZ        -0.00487   0.00002   0.00008   0.00000  -0.00012
 133        4XY         0.00005   0.00001   0.00020   0.00000  -0.00010
 134        4XZ         0.00007   0.00000  -0.00002   0.00000  -0.00001
 135        4YZ         0.00022   0.00000  -0.00021  -0.00001   0.00007
 136 10  C  1S         -0.00001   0.00000   0.00112  -0.00002   0.99439
 137        2S         -0.00007  -0.00001  -0.00020  -0.00001   0.04033
 138        2PX        -0.00003   0.00000   0.00021   0.00000  -0.00006
 139        2PY        -0.00002   0.00000   0.00039   0.00000   0.00009
 140        2PZ        -0.00001   0.00000   0.00018   0.00000   0.00002
 141        3S          0.00097   0.00021   0.00513   0.00010  -0.02079
 142        3PX        -0.00067   0.00001  -0.00077   0.00003   0.00085
 143        3PY         0.00000  -0.00008  -0.00245   0.00002   0.00133
 144        3PZ        -0.00010   0.00000  -0.00103  -0.00005   0.00068
 145        4XX         0.00011  -0.00001  -0.00043  -0.00001  -0.00414
 146        4YY        -0.00008   0.00000  -0.00052  -0.00001  -0.00434
 147        4ZZ        -0.00004  -0.00001  -0.00030  -0.00001  -0.00417
 148        4XY         0.00007   0.00000  -0.00026  -0.00001  -0.00013
 149        4XZ         0.00005   0.00000  -0.00014   0.00000  -0.00005
 150        4YZ        -0.00001   0.00000  -0.00017   0.00000  -0.00012
 151 11  H  1S          0.00000  -0.00020  -0.00003  -0.00047   0.00000
 152        2S          0.00001   0.00040  -0.00018   0.00316   0.00001
 153        3PX         0.00000   0.00005  -0.00002  -0.00038   0.00000
 154        3PY         0.00000  -0.00006   0.00000   0.00010   0.00000
 155        3PZ         0.00000   0.00007  -0.00003  -0.00018   0.00000
 156 12  H  1S          0.00000  -0.00016   0.00003  -0.00048   0.00000
 157        2S         -0.00001   0.00006  -0.00004   0.00304  -0.00005
 158        3PX         0.00000  -0.00006   0.00002   0.00026   0.00000
 159        3PY         0.00000  -0.00008  -0.00002   0.00033   0.00001
 160        3PZ         0.00000   0.00000   0.00002   0.00016   0.00000
 161 13  H  1S          0.00000  -0.00015   0.00005  -0.00044   0.00000
 162        2S         -0.00001   0.00024   0.00007   0.00330  -0.00002
 163        3PX         0.00000  -0.00008   0.00001   0.00021   0.00000
 164        3PY         0.00000   0.00000   0.00000  -0.00031   0.00000
 165        3PZ         0.00000   0.00008   0.00001  -0.00017   0.00000
 166 14  H  1S          0.00000   0.00046  -0.00001  -0.00001   0.00000
 167        2S          0.00000   0.00049   0.00006  -0.00005  -0.00001
 168        3PX         0.00000   0.00009   0.00001   0.00001   0.00000
 169        3PY         0.00000   0.00014   0.00000   0.00001   0.00000
 170        3PZ         0.00000  -0.00021   0.00000  -0.00002   0.00000
 171 15  H  1S          0.00000  -0.00001   0.00000  -0.00001   0.00000
 172        2S          0.00000  -0.00019   0.00000   0.00005   0.00000
 173        3PX         0.00000  -0.00004   0.00000   0.00001   0.00000
 174        3PY         0.00000  -0.00006   0.00000   0.00002   0.00000
 175        3PZ         0.00000   0.00004   0.00000   0.00002   0.00000
 176 16  H  1S          0.00000  -0.00001  -0.00015  -0.00001  -0.00051
 177        2S          0.00014  -0.00002  -0.00007  -0.00001   0.00305
 178        3PX         0.00003   0.00000  -0.00010   0.00000   0.00043
 179        3PY         0.00002   0.00000  -0.00001   0.00000  -0.00013
 180        3PZ         0.00001   0.00000  -0.00002   0.00000   0.00004
 181 17  H  1S         -0.00001   0.00000  -0.00018   0.00000  -0.00047
 182        2S         -0.00012   0.00000   0.00049  -0.00008   0.00322
 183        3PX         0.00002   0.00000  -0.00003   0.00000  -0.00009
 184        3PY        -0.00002   0.00000  -0.00009   0.00001   0.00030
 185        3PZ        -0.00001   0.00000   0.00005   0.00000  -0.00032
 186 18  H  1S         -0.00002   0.00000  -0.00017   0.00000  -0.00047
 187        2S         -0.00013  -0.00003   0.00044   0.00000   0.00319
 188        3PX         0.00002   0.00000   0.00000   0.00000  -0.00023
 189        3PY        -0.00003   0.00000  -0.00003   0.00000   0.00005
 190        3PZ         0.00000   0.00000  -0.00010   0.00000   0.00038
 191 19  H  1S         -0.00019   0.00001   0.00042   0.00000   0.00001
 192        2S          0.00039   0.00011   0.00052   0.00003   0.00008
 193        3PX        -0.00047   0.00001   0.00015   0.00000  -0.00001
 194        3PY        -0.00034   0.00000   0.00015   0.00000   0.00003
 195        3PZ        -0.00021   0.00000   0.00008   0.00000   0.00001
                          11        12        13        14        15
                           O         O         O         O         O
     Eigenvalues --    -1.11183  -1.03048  -0.92105  -0.82904  -0.82737
   1 1   C  1S         -0.00727  -0.00059   0.02776  -0.01659  -0.00322
   2        2S          0.01589   0.00068  -0.05254   0.03086   0.00632
   3        2PX        -0.00568   0.00027   0.01418   0.00205  -0.00040
   4        2PY        -0.00838  -0.00030   0.02104   0.00178   0.00124
   5        2PZ         0.00748   0.00008  -0.02367   0.02215   0.00570
   6        3S         -0.02058   0.00022  -0.02793   0.01587   0.00261
   7        3PX         0.00016   0.00120   0.00121   0.00823   0.00191
   8        3PY         0.00043  -0.00054   0.00180   0.01229   0.00226
   9        3PZ        -0.01279   0.00136   0.00174   0.00738   0.00072
  10        4XX         0.00105   0.00002  -0.00043  -0.00103  -0.00037
  11        4YY         0.00193  -0.00007  -0.00174  -0.00171  -0.00045
  12        4ZZ         0.00101   0.00000  -0.00332   0.00480   0.00114
  13        4XY         0.00124  -0.00013  -0.00181  -0.00107  -0.00003
  14        4XZ        -0.00119   0.00001   0.00241  -0.00031  -0.00023
  15        4YZ        -0.00173  -0.00004   0.00360  -0.00071  -0.00011
  16 2   C  1S         -0.05440  -0.00070   0.10033  -0.07501  -0.01984
  17        2S          0.10484   0.00034  -0.19877   0.15077   0.04055
  18        2PX        -0.04495   0.00057   0.03988   0.05562   0.01252
  19        2PY        -0.06353   0.00009   0.05528   0.07524   0.01919
  20        2PZ        -0.00651   0.00004  -0.00355   0.17735   0.04775
  21        3S          0.00984   0.00281  -0.05583   0.05383   0.01456
  22        3PX         0.02047  -0.00035  -0.01006  -0.00604   0.00009
  23        3PY         0.03107  -0.00218  -0.01571  -0.00794   0.00110
  24        3PZ        -0.02579  -0.00043   0.00985  -0.02758  -0.00384
  25        4XX         0.00072   0.00000   0.00412  -0.00944  -0.00287
  26        4YY         0.00749  -0.00015  -0.00224  -0.01283  -0.00340
  27        4ZZ        -0.00300  -0.00009  -0.00445   0.01958   0.00533
  28        4XY         0.01116  -0.00006  -0.01080  -0.00587  -0.00132
  29        4XZ         0.00260   0.00000  -0.00497  -0.00249  -0.00051
  30        4YZ         0.00358   0.00003  -0.00652  -0.00406  -0.00104
  31 3   N  1S         -0.01940  -0.00050   0.05956  -0.16594  -0.04413
  32        2S          0.03818   0.00065  -0.12232   0.33928   0.09105
  33        2PX        -0.01031   0.00000   0.01832  -0.04337  -0.01200
  34        2PY        -0.01429  -0.00012   0.02501  -0.06097  -0.01632
  35        2PZ        -0.01932  -0.00032   0.05171  -0.09067  -0.02407
  36        3S          0.04911   0.00122  -0.11357   0.35821   0.09143
  37        3PX        -0.00979   0.00099   0.01121  -0.01945  -0.00617
  38        3PY        -0.01431   0.00032   0.01587  -0.02723  -0.00762
  39        3PZ        -0.00787  -0.00049   0.01663  -0.03981  -0.00830
  40        4XX        -0.00024  -0.00014   0.00217  -0.00676  -0.00157
  41        4YY         0.00039  -0.00025   0.00155  -0.00441  -0.00086
  42        4ZZ         0.00128  -0.00009  -0.00370   0.00402   0.00112
  43        4XY         0.00105  -0.00011  -0.00108   0.00359   0.00108
  44        4XZ         0.00200  -0.00003  -0.00251   0.00109   0.00040
  45        4YZ         0.00284   0.00002  -0.00339   0.00123   0.00031
  46 4   O  1S         -0.16130   0.00045   0.09852   0.09067   0.02253
  47        2S          0.36751  -0.00060  -0.22521  -0.21169  -0.05285
  48        2PX         0.00571   0.00044  -0.08616  -0.01079  -0.00266
  49        2PY         0.00372   0.00041  -0.12465  -0.01597  -0.00328
  50        2PZ         0.09652  -0.00043   0.01670   0.01672   0.00479
  51        3S          0.32101  -0.00296  -0.25427  -0.24101  -0.05791
  52        3PX         0.00762  -0.00041  -0.03912  -0.00708  -0.00160
  53        3PY         0.00875  -0.00072  -0.05590  -0.01069  -0.00089
  54        3PZ         0.04789  -0.00030  -0.00723   0.00801   0.00212
  55        4XX        -0.00055   0.00015  -0.00058   0.00050  -0.00001
  56        4YY         0.00699   0.00012  -0.00295  -0.00027   0.00000
  57        4ZZ         0.01339   0.00008   0.00784   0.00307   0.00074
  58        4XY         0.01114  -0.00007  -0.00478  -0.00103  -0.00017
  59        4XZ        -0.00453   0.00002  -0.00779   0.00164   0.00048
  60        4YZ        -0.00766   0.00004  -0.01145   0.00229   0.00072
  61 5   O  1S         -0.13145   0.00094  -0.15795  -0.05115  -0.01237
  62        2S          0.30279  -0.00201   0.36650   0.11768   0.02818
  63        2PX         0.01419   0.00008  -0.04658  -0.02195  -0.00524
  64        2PY         0.02522   0.00004  -0.06428  -0.03231  -0.00757
  65        2PZ        -0.09296   0.00053  -0.04445   0.02398   0.00634
  66        3S          0.22879  -0.00228   0.35974   0.13367   0.03321
  67        3PX         0.00781  -0.00016  -0.01472  -0.00649  -0.00124
  68        3PY         0.01271  -0.00021  -0.01953  -0.00951  -0.00185
  69        3PZ        -0.02767   0.00026  -0.02461   0.00970   0.00247
  70        4XX        -0.00042   0.00008  -0.00148   0.00033   0.00000
  71        4YY         0.00492   0.00006   0.00064   0.00121   0.00022
  72        4ZZ         0.01436  -0.00002   0.00309  -0.00480  -0.00129
  73        4XY         0.00733  -0.00005   0.00363   0.00186   0.00051
  74        4XZ        -0.00655   0.00003   0.00214   0.00362   0.00087
  75        4YZ        -0.01051   0.00005   0.00266   0.00541   0.00134
  76 6   O  1S         -0.00058  -0.08388   0.00067  -0.02213   0.08446
  77        2S          0.00032   0.18527  -0.00078   0.05007  -0.18950
  78        2PX         0.00010   0.04556   0.00078   0.00237  -0.01232
  79        2PY         0.00017   0.06000  -0.00010   0.00934  -0.03497
  80        2PZ         0.00003   0.03111   0.00007   0.00423  -0.01592
  81        3S          0.00330   0.14618  -0.00340   0.04863  -0.18886
  82        3PX        -0.00091   0.01652   0.00074   0.00195  -0.00514
  83        3PY         0.00081   0.01703  -0.00090   0.00378  -0.01537
  84        3PZ         0.00057   0.00938  -0.00023   0.00207  -0.00694
  85        4XX        -0.00034   0.00440   0.00012  -0.00004   0.00118
  86        4YY        -0.00038   0.00886   0.00016   0.00146  -0.00439
  87        4ZZ        -0.00050  -0.00073   0.00029   0.00012   0.00092
  88        4XY         0.00003   0.01049   0.00011   0.00127  -0.00534
  89        4XZ         0.00000   0.00575   0.00004   0.00052  -0.00246
  90        4YZ         0.00012   0.00768  -0.00007   0.00109  -0.00410
  91 7   O  1S         -0.00037  -0.18648  -0.00130  -0.00588   0.02616
  92        2S          0.00109   0.42429   0.00282   0.01352  -0.06179
  93        2PX        -0.00016   0.05662   0.00175  -0.02362   0.08400
  94        2PY        -0.00018  -0.07517  -0.00035  -0.00844   0.03419
  95        2PZ        -0.00007  -0.02254   0.00010  -0.00677   0.02640
  96        3S          0.00005   0.38762   0.00318   0.01425  -0.05997
  97        3PX         0.00111   0.03639  -0.00069  -0.01040   0.03412
  98        3PY         0.00025  -0.03577  -0.00046  -0.00170   0.00801
  99        3PZ         0.00012  -0.00927  -0.00028  -0.00193   0.00844
 100        4XX         0.00019   0.01125  -0.00028  -0.00153   0.00638
 101        4YY         0.00014   0.00805  -0.00011   0.00154  -0.00665
 102        4ZZ         0.00015  -0.00271  -0.00018   0.00029  -0.00145
 103        4XY        -0.00009   0.00315   0.00012   0.00213  -0.00843
 104        4XZ        -0.00002   0.00414   0.00006   0.00055  -0.00246
 105        4YZ         0.00001   0.00694   0.00006   0.00119  -0.00461
 106 8   C  1S         -0.00013  -0.07666  -0.00106   0.03082  -0.11648
 107        2S          0.00022   0.14581   0.00208  -0.06122   0.23170
 108        2PX        -0.00005  -0.09789  -0.00105  -0.01773   0.07315
 109        2PY         0.00001   0.00298  -0.00006   0.02492  -0.09810
 110        2PZ         0.00000  -0.01312  -0.00018   0.00748  -0.02888
 111        3S         -0.00047   0.03153   0.00151  -0.02386   0.09059
 112        3PX         0.00024   0.03548  -0.00042   0.00074  -0.00289
 113        3PY        -0.00042   0.01686   0.00035  -0.00471   0.02008
 114        3PZ        -0.00009   0.01182   0.00004  -0.00177   0.00746
 115        4XX        -0.00008   0.01854   0.00041   0.00117  -0.00547
 116        4YY        -0.00004  -0.00512   0.00002  -0.00315   0.01245
 117        4ZZ        -0.00002  -0.00806  -0.00011   0.00196  -0.00724
 118        4XY         0.00003  -0.00481  -0.00015   0.00222  -0.00828
 119        4XZ        -0.00001   0.00265   0.00003   0.00064  -0.00259
 120        4YZ        -0.00001   0.00095   0.00004  -0.00238   0.00921
 121 9   N  1S         -0.00002  -0.02576  -0.00058   0.03924  -0.15203
 122        2S          0.00009   0.05265   0.00121  -0.08075   0.31245
 123        2PX        -0.00004  -0.02655  -0.00047   0.02392  -0.09211
 124        2PY         0.00003   0.01934   0.00037  -0.02027   0.07800
 125        2PZ         0.00001   0.00386   0.00008  -0.00460   0.01771
 126        3S         -0.00032   0.04536   0.00110  -0.07970   0.31177
 127        3PX         0.00005  -0.01930  -0.00011   0.00993  -0.03902
 128        3PY         0.00005   0.00240   0.00006  -0.00711   0.02757
 129        3PZ         0.00001  -0.00185   0.00002  -0.00140   0.00537
 130        4XX         0.00001   0.00371   0.00003   0.00002  -0.00022
 131        4YY         0.00003   0.00020  -0.00002  -0.00063   0.00234
 132        4ZZ         0.00001  -0.00102  -0.00001   0.00150  -0.00592
 133        4XY        -0.00002  -0.00413  -0.00003   0.00143  -0.00539
 134        4XZ        -0.00001  -0.00088  -0.00001   0.00027  -0.00101
 135        4YZ         0.00001  -0.00010  -0.00001  -0.00090   0.00355
 136 10  C  1S         -0.00001  -0.01270  -0.00027   0.01080  -0.04104
 137        2S          0.00003   0.02621   0.00047  -0.02032   0.07757
 138        2PX        -0.00004  -0.01393  -0.00020   0.00329  -0.01186
 139        2PY        -0.00003  -0.01276  -0.00023   0.00925  -0.03517
 140        2PZ        -0.00002  -0.00705  -0.00012   0.00416  -0.01567
 141        3S          0.00023  -0.01142   0.00029  -0.01377   0.04982
 142        3PX        -0.00005  -0.00388   0.00004  -0.00192   0.00808
 143        3PY        -0.00011   0.01048   0.00007   0.00115  -0.00420
 144        3PZ        -0.00006   0.00366   0.00005   0.00005  -0.00032
 145        4XX         0.00001   0.00256   0.00001   0.00016  -0.00068
 146        4YY         0.00001   0.00199   0.00002  -0.00141   0.00543
 147        4ZZ         0.00001   0.00083  -0.00001  -0.00008   0.00033
 148        4XY         0.00001   0.00300   0.00003  -0.00064   0.00233
 149        4XZ         0.00001   0.00156   0.00001  -0.00027   0.00098
 150        4YZ         0.00001   0.00125   0.00002  -0.00085   0.00321
 151 11  H  1S          0.00286   0.00025  -0.01169   0.00536   0.00103
 152        2S          0.00019   0.00094   0.00000  -0.00074   0.00022
 153        3PX        -0.00004   0.00004  -0.00032   0.00047   0.00014
 154        3PY        -0.00029  -0.00001   0.00102   0.00017   0.00005
 155        3PZ         0.00051   0.00001  -0.00113  -0.00014   0.00004
 156 12  H  1S          0.00272   0.00002  -0.00982   0.01148   0.00249
 157        2S          0.00140   0.00077   0.00236  -0.00262  -0.00053
 158        3PX         0.00000  -0.00005   0.00053  -0.00084  -0.00022
 159        3PY         0.00002  -0.00008   0.00072  -0.00124  -0.00020
 160        3PZ        -0.00002  -0.00004   0.00002   0.00072   0.00019
 161 13  H  1S          0.00300   0.00088  -0.01191   0.00551  -0.00057
 162        2S         -0.00015   0.00111   0.00018   0.00046  -0.00226
 163        3PX        -0.00026   0.00021   0.00106   0.00010  -0.00023
 164        3PY        -0.00017  -0.00013   0.00006   0.00053   0.00036
 165        3PZ         0.00052   0.00018  -0.00119  -0.00007  -0.00033
 166 14  H  1S          0.01470   0.00022  -0.02872   0.11219   0.03009
 167        2S         -0.00393   0.00040   0.00378   0.00401   0.00029
 168        3PX         0.00037   0.00002  -0.00211   0.00592   0.00156
 169        3PY         0.00063   0.00010  -0.00322   0.00892   0.00232
 170        3PZ        -0.00207  -0.00004   0.00422  -0.01009  -0.00272
 171 15  H  1S          0.07352  -0.00061   0.12223   0.04009   0.00951
 172        2S         -0.00125  -0.00006   0.00068   0.00368   0.00098
 173        3PX         0.00724  -0.00006   0.00919   0.00244   0.00058
 174        3PY         0.01013  -0.00009   0.01268   0.00332   0.00079
 175        3PZ         0.00487  -0.00005   0.00950   0.00341   0.00083
 176 16  H  1S          0.00000   0.00431   0.00008  -0.00545   0.02100
 177        2S         -0.00005   0.00154   0.00000   0.00050  -0.00161
 178        3PX         0.00001  -0.00015  -0.00001   0.00057  -0.00219
 179        3PY         0.00000   0.00005  -0.00001   0.00018  -0.00072
 180        3PZ         0.00000  -0.00004  -0.00001   0.00019  -0.00073
 181 17  H  1S          0.00000   0.00498   0.00012  -0.00460   0.01755
 182        2S          0.00004   0.00074  -0.00008  -0.00019   0.00095
 183        3PX         0.00000  -0.00034   0.00000   0.00005  -0.00018
 184        3PY         0.00000  -0.00086  -0.00001   0.00040  -0.00151
 185        3PZ         0.00000  -0.00005   0.00000  -0.00019   0.00072
 186 18  H  1S          0.00000   0.00522   0.00012  -0.00456   0.01730
 187        2S          0.00006   0.00038  -0.00011   0.00008   0.00074
 188        3PX         0.00000  -0.00030   0.00000  -0.00007   0.00029
 189        3PY         0.00000  -0.00073   0.00000   0.00017  -0.00065
 190        3PZ         0.00000  -0.00066  -0.00001   0.00037  -0.00145
 191 19  H  1S          0.00002   0.01856   0.00038  -0.02432   0.09428
 192        2S          0.00024  -0.00109  -0.00011  -0.00067   0.00156
 193        3PX         0.00000   0.00050   0.00004  -0.00220   0.00849
 194        3PY         0.00001   0.00269   0.00004  -0.00255   0.00982
 195        3PZ         0.00001   0.00116   0.00002  -0.00135   0.00521
                          16        17        18        19        20
                           O         O         O         O         O
     Eigenvalues --    -0.76552  -0.70344  -0.67329  -0.54004  -0.48969
   1 1   C  1S         -0.00291  -0.17790   0.00310   0.07364  -0.02401
   2        2S          0.00537   0.33938  -0.00586  -0.13908   0.04556
   3        2PX         0.00093  -0.01900   0.00098  -0.06441  -0.01171
   4        2PY        -0.00167  -0.02858  -0.00030  -0.09593  -0.01135
   5        2PZ         0.00007   0.03882  -0.00101   0.09560  -0.12159
   6        3S          0.00338   0.32202  -0.00705  -0.17642   0.07950
   7        3PX        -0.00055  -0.00568  -0.00041  -0.01812  -0.00928
   8        3PY         0.00194  -0.00596   0.00086  -0.02821  -0.00958
   9        3PZ         0.00254   0.00788   0.00123   0.02311  -0.04163
  10        4XX         0.00002   0.00018  -0.00002  -0.00107   0.00279
  11        4YY         0.00008   0.00141   0.00003   0.00168   0.00197
  12        4ZZ         0.00015   0.00318   0.00000   0.00401  -0.00834
  13        4XY        -0.00021   0.00177  -0.00012   0.00377  -0.00146
  14        4XZ         0.00006  -0.00206   0.00005  -0.00569   0.00150
  15        4YZ        -0.00012  -0.00323   0.00002  -0.00811   0.00250
  16 2   C  1S         -0.00031  -0.05887   0.00110  -0.09366   0.03991
  17        2S         -0.00071   0.12600  -0.00304   0.20631  -0.08966
  18        2PX         0.00274   0.05808  -0.00001  -0.05797  -0.13336
  19        2PY         0.00075   0.08954  -0.00204  -0.07729  -0.18938
  20        2PZ        -0.00404  -0.17053   0.00267  -0.08043  -0.12045
  21        3S          0.00333   0.08668   0.00019   0.18242  -0.09734
  22        3PX        -0.00104   0.00315  -0.00033  -0.00387  -0.03229
  23        3PY        -0.00552   0.00495  -0.00292  -0.00369  -0.04752
  24        3PZ        -0.00324  -0.01544  -0.00030  -0.01046  -0.00770
  25        4XX         0.00033  -0.00196   0.00012  -0.00300   0.00354
  26        4YY         0.00006  -0.00065   0.00003   0.00013   0.00743
  27        4ZZ        -0.00033   0.00669  -0.00026  -0.00362   0.00010
  28        4XY        -0.00023   0.00128  -0.00015   0.00604   0.00628
  29        4XZ        -0.00019  -0.00483   0.00003   0.00821  -0.00328
  30        4YZ        -0.00001  -0.00757   0.00020   0.01140  -0.00497
  31 3   N  1S          0.00209   0.04958  -0.00059   0.03563   0.00606
  32        2S         -0.00467  -0.10359   0.00126  -0.07475  -0.01640
  33        2PX         0.00122   0.03212  -0.00031   0.01637  -0.09210
  34        2PY         0.00094   0.04722  -0.00098   0.02713  -0.13938
  35        2PZ         0.00057  -0.01785   0.00055  -0.08928   0.23109
  36        3S         -0.00259  -0.12121   0.00142  -0.11990   0.00570
  37        3PX         0.00083   0.01448   0.00000   0.00707  -0.04949
  38        3PY         0.00144   0.02128   0.00017   0.01148  -0.07343
  39        3PZ        -0.00142  -0.00440  -0.00011  -0.03097   0.08994
  40        4XX        -0.00008   0.00096  -0.00003   0.00049   0.00356
  41        4YY        -0.00011  -0.00096   0.00003  -0.00115   0.01073
  42        4ZZ         0.00010   0.00330  -0.00002   0.00556  -0.01493
  43        4XY        -0.00019  -0.00301   0.00000  -0.00213   0.01073
  44        4XZ        -0.00009  -0.00185   0.00001   0.00392  -0.00110
  45        4YZ        -0.00008  -0.00275   0.00003   0.00541  -0.00133
  46 4   O  1S          0.00123   0.03582  -0.00026   0.03134   0.03191
  47        2S         -0.00275  -0.08448   0.00060  -0.07517  -0.07130
  48        2PX         0.00077   0.02582   0.00014   0.18974   0.14496
  49        2PY        -0.00053   0.03862  -0.00126   0.27674   0.20151
  50        2PZ        -0.00117  -0.04913   0.00066  -0.09751   0.07889
  51        3S         -0.00638  -0.10972  -0.00032  -0.10604  -0.12069
  52        3PX         0.00017   0.01037   0.00015   0.10088   0.08091
  53        3PY        -0.00244   0.01594  -0.00157   0.14732   0.11228
  54        3PZ        -0.00069  -0.02641   0.00017  -0.05607   0.04363
  55        4XX         0.00014   0.00290   0.00000   0.00622   0.00013
  56        4YY        -0.00015   0.00472  -0.00022   0.00988  -0.00165
  57        4ZZ        -0.00015  -0.00401  -0.00003  -0.01490   0.00732
  58        4XY        -0.00013   0.00276  -0.00013   0.00679  -0.00189
  59        4XZ        -0.00008  -0.00136   0.00001   0.00827   0.00582
  60        4YZ        -0.00016  -0.00168  -0.00003   0.01276   0.00796
  61 5   O  1S         -0.00088  -0.02919   0.00035  -0.03271  -0.04337
  62        2S          0.00241   0.06953  -0.00071   0.07259   0.09271
  63        2PX        -0.00076  -0.04430   0.00082  -0.14697   0.07615
  64        2PY        -0.00153  -0.06458   0.00080  -0.21760   0.09760
  65        2PZ         0.00023   0.01975  -0.00024   0.14157   0.23425
  66        3S          0.00137   0.08387  -0.00144   0.12391   0.17297
  67        3PX        -0.00069  -0.02206   0.00030  -0.07781   0.04897
  68        3PY        -0.00113  -0.03197   0.00022  -0.11495   0.06357
  69        3PZ         0.00021   0.00563   0.00000   0.06884   0.13725
  70        4XX         0.00011   0.00053   0.00003   0.00266   0.00072
  71        4YY         0.00011  -0.00033   0.00005   0.00304   0.00291
  72        4ZZ         0.00001  -0.00421   0.00009  -0.02002  -0.01944
  73        4XY        -0.00007  -0.00072  -0.00001   0.00221   0.00311
  74        4XZ         0.00011   0.00347  -0.00004   0.00934  -0.00178
  75        4YZ         0.00011   0.00528  -0.00007   0.01461  -0.00136
  76 6   O  1S         -0.16620   0.00434  -0.06777  -0.00048  -0.00671
  77        2S          0.37039  -0.00985   0.15271   0.00125   0.01418
  78        2PX         0.01386  -0.00343  -0.01514  -0.00051  -0.00427
  79        2PY         0.01538   0.00060  -0.01195  -0.00131  -0.01260
  80        2PZ         0.00806  -0.00158  -0.00729   0.00113  -0.00728
  81        3S          0.41011  -0.01015   0.18379   0.00134   0.02471
  82        3PX         0.01127  -0.00137  -0.00826  -0.00007  -0.00220
  83        3PY         0.00673   0.00097  -0.00453  -0.00066  -0.00593
  84        3PZ         0.00440  -0.00131  -0.00308   0.00048  -0.00364
  85        4XX        -0.00149   0.00013  -0.00282   0.00036  -0.00037
  86        4YY         0.00012   0.00039  -0.00205  -0.00008  -0.00159
  87        4ZZ        -0.00390   0.00020  -0.00123   0.00009  -0.00057
  88        4XY         0.00290  -0.00051  -0.00109  -0.00007  -0.00041
  89        4XZ         0.00185  -0.00005  -0.00078  -0.00003  -0.00014
  90        4YZ         0.00289  -0.00029  -0.00073   0.00011  -0.00080
  91 7   O  1S          0.08449   0.00005   0.04751   0.00032   0.00700
  92        2S         -0.19309  -0.00015  -0.11067  -0.00057  -0.01571
  93        2PX        -0.14858   0.00097  -0.02694   0.00340   0.03133
  94        2PY        -0.08703   0.00543   0.00638  -0.00205  -0.00154
  95        2PZ        -0.05716   0.00092  -0.00184   0.00183   0.00220
  96        3S         -0.24232   0.00109  -0.14596  -0.00124  -0.02722
  97        3PX        -0.06954   0.00213  -0.01735   0.00219   0.01697
  98        3PY        -0.03689   0.00237   0.00400  -0.00145  -0.00133
  99        3PZ        -0.02509   0.00075  -0.00098   0.00076   0.00081
 100        4XX        -0.00720   0.00100   0.00084   0.00018   0.00144
 101        4YY         0.01365  -0.00027   0.00304  -0.00002  -0.00018
 102        4ZZ         0.00309   0.00022   0.00155  -0.00012   0.00017
 103        4XY         0.00613  -0.00043   0.00602   0.00002  -0.00059
 104        4XZ         0.00125   0.00010   0.00247  -0.00008   0.00003
 105        4YZ         0.00716  -0.00043   0.00211   0.00003  -0.00027
 106 8   C  1S          0.02170  -0.00161  -0.03306  -0.00084  -0.01296
 107        2S         -0.04387   0.00330   0.07051   0.00187   0.02837
 108        2PX         0.12415   0.00169   0.10166  -0.00189  -0.00462
 109        2PY        -0.13739   0.00394   0.13924   0.00046   0.00861
 110        2PZ        -0.03703   0.00165   0.06955   0.00038   0.00224
 111        3S         -0.03075   0.00080   0.05247   0.00138   0.02701
 112        3PX        -0.01715   0.00143   0.00146   0.00052  -0.00004
 113        3PY         0.01019   0.00064   0.01625   0.00005   0.00295
 114        3PZ         0.00155   0.00012   0.00643   0.00071   0.00078
 115        4XX        -0.01510  -0.00052  -0.00461   0.00016   0.00064
 116        4YY         0.00883   0.00010   0.00732  -0.00009  -0.00084
 117        4ZZ         0.00382  -0.00004   0.00208  -0.00006  -0.00073
 118        4XY         0.00289   0.00010   0.01075   0.00003  -0.00041
 119        4XZ        -0.00183   0.00002   0.00349  -0.00004   0.00012
 120        4YZ         0.00319   0.00008   0.00481   0.00000  -0.00014
 121 9   N  1S         -0.09091   0.00086   0.04315   0.00057   0.00628
 122        2S          0.18651  -0.00191  -0.09115  -0.00123  -0.01334
 123        2PX        -0.05393   0.00124   0.04975  -0.00012   0.00246
 124        2PY         0.01964   0.00084   0.02379   0.00036   0.01597
 125        2PZ        -0.00010   0.00047   0.01665   0.00029   0.00660
 126        3S          0.20803  -0.00156  -0.10241  -0.00158  -0.02050
 127        3PX        -0.01996   0.00006   0.02310  -0.00030   0.00130
 128        3PY         0.01622   0.00017   0.01045   0.00005   0.00703
 129        3PZ         0.00356   0.00018   0.00760  -0.00009   0.00297
 130        4XX        -0.00036  -0.00014  -0.00442   0.00007  -0.00007
 131        4YY        -0.00027   0.00013   0.00418  -0.00001   0.00074
 132        4ZZ        -0.00374   0.00001   0.00233   0.00000   0.00020
 133        4XY        -0.00036  -0.00001   0.00182  -0.00006  -0.00109
 134        4XZ         0.00056  -0.00003  -0.00033  -0.00002  -0.00047
 135        4YZ         0.00189   0.00006   0.00128  -0.00001   0.00006
 136 10  C  1S          0.03361  -0.00384  -0.17974   0.00039   0.00590
 137        2S         -0.06383   0.00735   0.34184  -0.00078  -0.01088
 138        2PX         0.02810  -0.00080  -0.00919  -0.00068  -0.01164
 139        2PY         0.00820  -0.00084  -0.01777  -0.00069  -0.01710
 140        2PZ         0.00724  -0.00050  -0.00882  -0.00016  -0.00861
 141        3S         -0.05592   0.00619   0.33277  -0.00073  -0.01547
 142        3PX         0.01590  -0.00053  -0.00044  -0.00003  -0.00275
 143        3PY        -0.00226  -0.00010  -0.00319   0.00032  -0.00525
 144        3PZ         0.00123   0.00014  -0.00148  -0.00011  -0.00220
 145        4XX        -0.00280   0.00005   0.00045   0.00002   0.00000
 146        4YY         0.00036   0.00009   0.00231   0.00000   0.00072
 147        4ZZ         0.00003   0.00001   0.00040  -0.00001  -0.00016
 148        4XY        -0.00335   0.00011   0.00129   0.00007   0.00103
 149        4XZ        -0.00181   0.00005   0.00062   0.00003   0.00049
 150        4YZ        -0.00053   0.00007   0.00125   0.00001   0.00070
 151 11  H  1S          0.00139   0.10831  -0.00212  -0.07638   0.05739
 152        2S         -0.00020   0.01857  -0.00053  -0.03112   0.02561
 153        3PX         0.00009   0.00666  -0.00011  -0.00621   0.00275
 154        3PY        -0.00009  -0.00381   0.00005  -0.00069  -0.00190
 155        3PZ        -0.00004   0.00590  -0.00016  -0.00052  -0.00010
 156 12  H  1S          0.00136   0.10592  -0.00208  -0.09845  -0.00558
 157        2S         -0.00125   0.01936  -0.00087  -0.04464  -0.00658
 158        3PX        -0.00006  -0.00544   0.00012   0.00315   0.00051
 159        3PY        -0.00013  -0.00745   0.00012   0.00410   0.00088
 160        3PZ        -0.00007  -0.00169   0.00000   0.00385  -0.00408
 161 13  H  1S          0.00398   0.10784  -0.00070  -0.07373   0.05673
 162        2S          0.00601   0.01998   0.00327  -0.03120   0.02685
 163        3PX         0.00021  -0.00553   0.00019   0.00124  -0.00272
 164        3PY        -0.00035   0.00508  -0.00029  -0.00615   0.00200
 165        3PZ         0.00054   0.00625   0.00010  -0.00060   0.00008
 166 14  H  1S         -0.00182  -0.06086   0.00097  -0.07484   0.16724
 167        2S          0.00085  -0.00829   0.00059  -0.02755   0.08388
 168        3PX        -0.00005  -0.00288   0.00006  -0.00303   0.00289
 169        3PY        -0.00009  -0.00434   0.00008  -0.00446   0.00433
 170        3PZ         0.00018   0.00441  -0.00005   0.00187  -0.00233
 171 15  H  1S          0.00114   0.04553  -0.00063   0.11195  -0.08543
 172        2S          0.00007   0.00681  -0.00010   0.03809  -0.03217
 173        3PX         0.00006   0.00248  -0.00003   0.00357  -0.00357
 174        3PY         0.00008   0.00338  -0.00005   0.00463  -0.00519
 175        3PZ         0.00009   0.00343  -0.00004   0.00971   0.00182
 176 16  H  1S         -0.01141   0.00223   0.11566  -0.00057  -0.00975
 177        2S         -0.00259   0.00058   0.02610  -0.00041  -0.00591
 178        3PX         0.00098  -0.00019  -0.00969   0.00004   0.00046
 179        3PY        -0.00074   0.00003   0.00142  -0.00002  -0.00051
 180        3PZ        -0.00006  -0.00004  -0.00149   0.00001  -0.00009
 181 17  H  1S         -0.01992   0.00233   0.11578  -0.00051  -0.00883
 182        2S         -0.00345   0.00088   0.02569  -0.00088  -0.00458
 183        3PX         0.00072   0.00000   0.00075  -0.00002  -0.00034
 184        3PY         0.00220  -0.00020  -0.00805   0.00003   0.00010
 185        3PZ        -0.00070   0.00012   0.00577  -0.00004  -0.00061
 186 18  H  1S         -0.02080   0.00232   0.11524  -0.00033  -0.00895
 187        2S         -0.00325   0.00040   0.02547  -0.00036  -0.00520
 188        3PX         0.00025   0.00006   0.00378  -0.00003  -0.00055
 189        3PY         0.00135  -0.00008  -0.00285  -0.00002  -0.00023
 190        3PZ         0.00217  -0.00019  -0.00870   0.00003   0.00040
 191 19  H  1S          0.07617  -0.00162  -0.05214  -0.00051  -0.01212
 192        2S          0.01772  -0.00076  -0.00599  -0.00027  -0.00437
 193        3PX         0.00539  -0.00008  -0.00392  -0.00008  -0.00097
 194        3PY         0.00602  -0.00009  -0.00383  -0.00002  -0.00028
 195        3PZ         0.00322  -0.00006  -0.00214  -0.00001  -0.00027
                          21        22        23        24        25
                           O         O         O         O         O
     Eigenvalues --    -0.48399  -0.47577  -0.44382  -0.42334  -0.39379
   1 1   C  1S          0.00074   0.00969  -0.00169   0.00069  -0.00107
   2        2S         -0.00005  -0.01632   0.00558  -0.00049   0.00177
   3        2PX        -0.00381   0.00728  -0.02701   0.18382  -0.01985
   4        2PY         0.00286   0.00571   0.01761  -0.13278  -0.00229
   5        2PZ         0.00799   0.09072   0.00078   0.00027   0.01682
   6        3S         -0.00728  -0.03105  -0.00045  -0.00474   0.01355
   7        3PX        -0.00646   0.01308  -0.01883   0.07958  -0.01343
   8        3PY         0.00635   0.01645   0.01335  -0.05743  -0.00237
   9        3PZ         0.00260   0.03145  -0.00332   0.00145   0.00360
  10        4XX        -0.00036  -0.00162   0.00064  -0.00702  -0.00036
  11        4YY        -0.00017  -0.00103  -0.00076   0.00715  -0.00019
  12        4ZZ         0.00092   0.00537   0.00055   0.00025   0.00040
  13        4XY         0.00034   0.00076   0.00062  -0.00257   0.00038
  14        4XZ        -0.00019  -0.00211  -0.00008  -0.00017  -0.00001
  15        4YZ        -0.00009  -0.00323  -0.00008   0.00029  -0.00101
  16 2   C  1S         -0.00208  -0.06558  -0.00186  -0.00047  -0.00037
  17        2S          0.00501   0.14927   0.00626   0.00199  -0.00015
  18        2PX         0.01180   0.01962  -0.02281   0.21437   0.01362
  19        2PY         0.02415   0.02462   0.02237  -0.14550   0.00940
  20        2PZ         0.01235   0.06799   0.00482  -0.00893  -0.02156
  21        3S          0.00655   0.13602   0.00039  -0.00191   0.00771
  22        3PX         0.00261   0.00727  -0.01069   0.09570   0.00629
  23        3PY         0.00354   0.00909   0.00879  -0.06638   0.00017
  24        3PZ        -0.00207   0.01090  -0.00434  -0.00307   0.00237
  25        4XX        -0.00085  -0.00053   0.00002  -0.00913  -0.00100
  26        4YY        -0.00084   0.00292  -0.00044   0.00860   0.00047
  27        4ZZ         0.00066  -0.01148   0.00035   0.00061   0.00066
  28        4XY        -0.00090   0.00440   0.00043  -0.00345  -0.00076
  29        4XZ         0.00037  -0.00467   0.00020  -0.00318   0.00007
  30        4YZ         0.00064  -0.00627  -0.00046   0.00248  -0.00083
  31 3   N  1S         -0.00337   0.06245   0.00018  -0.00068  -0.00080
  32        2S          0.00880  -0.13545   0.00084   0.00146   0.00147
  33        2PX         0.00634   0.03235  -0.01153   0.09853   0.00637
  34        2PY         0.01440   0.05162   0.01075  -0.06789  -0.00137
  35        2PZ        -0.01913  -0.20915  -0.00835   0.00196   0.01537
  36        3S          0.00732  -0.20709   0.00018   0.00329  -0.00242
  37        3PX         0.00064   0.01460  -0.01024   0.05683   0.00743
  38        3PY         0.00888   0.02351   0.00676  -0.03872  -0.00016
  39        3PZ        -0.00699  -0.09491  -0.00434   0.00009   0.00965
  40        4XX        -0.00019  -0.00010   0.00071  -0.00593  -0.00030
  41        4YY        -0.00070  -0.00220  -0.00028   0.00563   0.00015
  42        4ZZ         0.00172   0.01060   0.00088   0.00014  -0.00073
  43        4XY        -0.00087  -0.00278   0.00035  -0.00234  -0.00036
  44        4XZ         0.00025   0.00613   0.00152  -0.00963  -0.00117
  45        4YZ        -0.00042   0.00873  -0.00075   0.00641  -0.00092
  46 4   O  1S         -0.00510   0.05317   0.00049  -0.00016  -0.00006
  47        2S          0.01052  -0.11828  -0.00206   0.00000  -0.00012
  48        2PX        -0.01911   0.02381  -0.02836   0.29839   0.01039
  49        2PY        -0.02561   0.01683   0.01405  -0.21197  -0.01980
  50        2PZ        -0.01861   0.30160   0.00394  -0.01176  -0.00775
  51        3S          0.01995  -0.20617  -0.00025   0.00146   0.00000
  52        3PX        -0.01002   0.01703  -0.01662   0.19266   0.00737
  53        3PY        -0.01546   0.01397   0.00857  -0.13591  -0.01224
  54        3PZ        -0.01071   0.18104   0.00330  -0.00786  -0.00642
  55        4XX        -0.00032  -0.00281  -0.00151   0.01004   0.00025
  56        4YY        -0.00008  -0.00438   0.00054  -0.00953  -0.00023
  57        4ZZ        -0.00200   0.02551  -0.00003  -0.00099  -0.00015
  58        4XY         0.00011  -0.00212  -0.00041   0.00373   0.00000
  59        4XZ        -0.00089   0.00292  -0.00116   0.01284   0.00009
  60        4YZ        -0.00109   0.00260   0.00069  -0.00960  -0.00164
  61 5   O  1S          0.00621  -0.03469   0.00031   0.00018  -0.00138
  62        2S         -0.01360   0.08295  -0.00063  -0.00044   0.00334
  63        2PX        -0.01420   0.19583  -0.01074   0.16487   0.01966
  64        2PY        -0.01905   0.27564   0.01056  -0.11458   0.00170
  65        2PZ        -0.03001   0.06194  -0.00384  -0.00716   0.00370
  66        3S         -0.02450   0.11908  -0.00180  -0.00066   0.00592
  67        3PX        -0.00859   0.11134  -0.00703   0.11057   0.01270
  68        3PY        -0.01163   0.15619   0.00700  -0.07671  -0.00019
  69        3PZ        -0.01761   0.04248  -0.00189  -0.00486   0.00178
  70        4XX        -0.00015  -0.00072  -0.00042   0.00296   0.00003
  71        4YY        -0.00038   0.00041   0.00024  -0.00375  -0.00048
  72        4ZZ         0.00240  -0.00298   0.00019   0.00081   0.00034
  73        4XY        -0.00042   0.00000  -0.00025   0.00181  -0.00027
  74        4XZ         0.00059  -0.01191   0.00073  -0.01050  -0.00093
  75        4YZ         0.00063  -0.01682  -0.00076   0.00717   0.00014
  76 6   O  1S         -0.06025  -0.00181  -0.04095  -0.00466  -0.00092
  77        2S          0.13114   0.00427   0.08359   0.00394   0.00144
  78        2PX        -0.04311  -0.00196  -0.00191  -0.03544  -0.01327
  79        2PY        -0.10815  -0.00263  -0.15659  -0.02110  -0.03222
  80        2PZ        -0.05070  -0.00015  -0.06353  -0.01954   0.07313
  81        3S          0.21458   0.00626   0.16473   0.03353   0.00483
  82        3PX        -0.02316   0.00006   0.00816  -0.02775  -0.00943
  83        3PY        -0.05506  -0.00088  -0.08814  -0.00916  -0.02112
  84        3PZ        -0.02593   0.00060  -0.03442  -0.01052   0.04994
  85        4XX        -0.00290   0.00004   0.00174  -0.00208  -0.00140
  86        4YY        -0.01209   0.00001  -0.01538  -0.00384  -0.00351
  87        4ZZ        -0.00352   0.00012  -0.00485  -0.00266   0.00380
  88        4XY        -0.00426  -0.00014  -0.00543  -0.00312  -0.00241
  89        4XZ        -0.00203  -0.00014  -0.00152  -0.00149   0.00346
  90        4YZ        -0.00577   0.00001  -0.00700  -0.00172   0.00345
  91 7   O  1S          0.06103   0.00196   0.04374   0.00304  -0.00048
  92        2S         -0.14213  -0.00442  -0.09808  -0.00942   0.00069
  93        2PX         0.23626   0.00476   0.31086   0.02769  -0.03759
  94        2PY        -0.00262   0.00018  -0.00238   0.04975  -0.09724
  95        2PZ         0.03339   0.00139   0.04547   0.01514   0.25422
  96        3S         -0.22336  -0.00713  -0.17483  -0.00808   0.00231
  97        3PX         0.12526   0.00351   0.16591   0.01417  -0.02412
  98        3PY        -0.00401   0.00039  -0.00255   0.03174  -0.06279
  99        3PZ         0.01677   0.00034   0.02384   0.00944   0.16512
 100        4XX         0.01382   0.00082   0.01029   0.00249  -0.00349
 101        4YY        -0.00226   0.00000  -0.00038  -0.00312   0.00429
 102        4ZZ        -0.00042   0.00004   0.00043  -0.00006  -0.00155
 103        4XY        -0.00499  -0.00023  -0.00837  -0.00001  -0.00415
 104        4XZ         0.00022   0.00003  -0.00194   0.00021   0.01335
 105        4YZ        -0.00189  -0.00013  -0.00212  -0.00130  -0.00629
 106 8   C  1S         -0.12084  -0.00463   0.01608   0.00130   0.00040
 107        2S          0.26601   0.01025  -0.03521  -0.00305  -0.00070
 108        2PX         0.00038   0.00328  -0.28595  -0.02271  -0.03392
 109        2PY         0.07366   0.00207   0.08078   0.03053  -0.09490
 110        2PZ         0.02955   0.00146  -0.00912   0.00428   0.24287
 111        3S          0.25001   0.00941  -0.04114  -0.00371  -0.00258
 112        3PX         0.00941   0.00210  -0.06872  -0.00763  -0.01682
 113        3PY         0.02357   0.00113   0.01280   0.00510  -0.04429
 114        3PZ         0.01038   0.00109  -0.00491  -0.00181   0.11309
 115        4XX         0.00322  -0.00015   0.00338  -0.00145   0.00136
 116        4YY        -0.00725  -0.00026   0.00468   0.00200  -0.00290
 117        4ZZ        -0.00625  -0.00020  -0.00010   0.00016   0.00168
 118        4XY        -0.00378  -0.00007   0.00220  -0.00158   0.00114
 119        4XZ        -0.00002  -0.00008   0.00162  -0.00059  -0.00513
 120        4YZ        -0.00126  -0.00006   0.00315   0.00065   0.00418
 121 9   N  1S          0.05574   0.00196   0.00271  -0.00449  -0.00068
 122        2S         -0.11878  -0.00425  -0.00655   0.00996   0.00126
 123        2PX         0.03507   0.00234  -0.11338  -0.00710  -0.01491
 124        2PY         0.17207   0.00856  -0.23579  -0.03731  -0.04636
 125        2PZ         0.07433   0.00386  -0.11143  -0.01805   0.11204
 126        3S         -0.18568  -0.00642   0.00777   0.01506   0.00341
 127        3PX         0.01818   0.00089  -0.06700  -0.00322  -0.00859
 128        3PY         0.07568   0.00363  -0.10074  -0.01689  -0.02589
 129        3PZ         0.03323   0.00154  -0.05038  -0.00823   0.06508
 130        4XX        -0.00256  -0.00023   0.01513   0.00071   0.00185
 131        4YY         0.00819   0.00041  -0.01194  -0.00119  -0.00619
 132        4ZZ         0.00194   0.00006  -0.00218  -0.00007   0.00401
 133        4XY        -0.01055  -0.00046   0.00760   0.00198   0.00215
 134        4XZ        -0.00505  -0.00024   0.00592   0.00108  -0.00849
 135        4YZ         0.00125   0.00009  -0.00361  -0.00039   0.00792
 136 10  C  1S          0.05467   0.00205  -0.01121   0.00145  -0.00018
 137        2S         -0.10103  -0.00375   0.02119  -0.00282   0.00037
 138        2PX        -0.10567  -0.00346  -0.08939  -0.03146  -0.04197
 139        2PY        -0.17668  -0.00795   0.12910   0.00762  -0.11466
 140        2PZ        -0.08422  -0.00357   0.03735  -0.00485   0.29132
 141        3S         -0.14448  -0.00594   0.03963  -0.00110   0.00077
 142        3PX        -0.02832  -0.00096  -0.04145  -0.01657  -0.01876
 143        3PY        -0.05687  -0.00223   0.05511   0.00195  -0.05475
 144        3PZ        -0.02508  -0.00093   0.01601  -0.00270   0.13642
 145        4XX        -0.00029  -0.00003   0.00072  -0.00011   0.00335
 146        4YY         0.00758   0.00033  -0.00594  -0.00028  -0.00162
 147        4ZZ        -0.00185  -0.00009   0.00315   0.00040  -0.00175
 148        4XY         0.00979   0.00036   0.00089   0.00082   0.00221
 149        4XZ         0.00460   0.00017  -0.00096   0.00022  -0.00855
 150        4YZ         0.00709   0.00030  -0.00438  -0.00008   0.00344
 151 11  H  1S         -0.00071  -0.03746   0.01695  -0.11293   0.00402
 152        2S         -0.00271  -0.02388   0.00548  -0.07703  -0.00053
 153        3PX        -0.00009  -0.00168   0.00018  -0.00075  -0.00030
 154        3PY         0.00002   0.00178  -0.00011   0.00054  -0.00006
 155        3PZ         0.00007   0.00018   0.00071  -0.00559   0.00055
 156 12  H  1S          0.00057   0.00866   0.00066   0.00109  -0.00464
 157        2S         -0.00313  -0.00399  -0.00204   0.00143  -0.00543
 158        3PX        -0.00015  -0.00044  -0.00069   0.00454  -0.00039
 159        3PY         0.00010  -0.00071   0.00047  -0.00340   0.00025
 160        3PZ         0.00029   0.00235   0.00004  -0.00002   0.00057
 161 13  H  1S         -0.00481  -0.03686  -0.01455   0.10859  -0.01356
 162        2S          0.00349  -0.02412  -0.00702   0.07870  -0.01973
 163        3PX        -0.00020   0.00226  -0.00053  -0.00045  -0.00046
 164        3PY        -0.00025  -0.00099   0.00009   0.00017  -0.00045
 165        3PZ        -0.00007   0.00007  -0.00094   0.00575  -0.00035
 166 14  H  1S         -0.01331  -0.13176  -0.00418   0.00195   0.00670
 167        2S         -0.00765  -0.04872  -0.00253   0.00135   0.00705
 168        3PX        -0.00009  -0.00631  -0.00051   0.00394   0.00038
 169        3PY        -0.00020  -0.00930  -0.00004  -0.00249   0.00026
 170        3PZ         0.00022   0.00060   0.00000  -0.00004   0.00024
 171 15  H  1S          0.01459  -0.16083  -0.00042  -0.00006  -0.00697
 172        2S          0.00617  -0.07285   0.00001   0.00013  -0.00357
 173        3PX         0.00055  -0.00412  -0.00030   0.00479   0.00018
 174        3PY         0.00079  -0.00570   0.00031  -0.00333  -0.00049
 175        3PZ        -0.00008  -0.00497  -0.00007  -0.00021  -0.00029
 176 16  H  1S         -0.08853  -0.00297  -0.05039  -0.02042   0.01231
 177        2S         -0.05227  -0.00172  -0.03355  -0.01196   0.00792
 178        3PX         0.00403   0.00013   0.00204   0.00072  -0.00189
 179        3PY        -0.00527  -0.00024   0.00391   0.00013  -0.00281
 180        3PZ        -0.00105  -0.00006   0.00205   0.00015   0.00721
 181 17  H  1S         -0.08899  -0.00383   0.05893   0.00545  -0.16541
 182        2S         -0.04715  -0.00210   0.03153   0.00489  -0.12046
 183        3PX        -0.00308  -0.00010  -0.00206  -0.00085  -0.00104
 184        3PY         0.00101   0.00003  -0.00069  -0.00028   0.00716
 185        3PZ        -0.00602  -0.00026   0.00304   0.00009   0.00120
 186 18  H  1S         -0.08880  -0.00383   0.06696   0.00452   0.15301
 187        2S         -0.04843  -0.00248   0.03540   0.00372   0.11282
 188        3PX        -0.00505  -0.00019  -0.00065  -0.00075   0.00199
 189        3PY        -0.00245  -0.00011   0.00114   0.00000  -0.00677
 190        3PZ         0.00383   0.00018  -0.00346  -0.00050  -0.00237
 191 19  H  1S         -0.12731  -0.00615   0.15948   0.02327   0.00038
 192        2S         -0.04991  -0.00303   0.09993   0.01548   0.00088
 193        3PX        -0.00950  -0.00042   0.00577   0.00154  -0.00047
 194        3PY        -0.00288  -0.00013   0.00243   0.00009  -0.00159
 195        3PZ        -0.00258  -0.00011   0.00185   0.00018   0.00387
                          26        27        28        29        30
                           O         O         O         O         O
     Eigenvalues --    -0.38607  -0.38283  -0.36500  -0.36300  -0.34442
   1 1   C  1S         -0.00759   0.00289  -0.00070   0.00001  -0.00012
   2        2S          0.00811  -0.00739   0.00322  -0.00077   0.00050
   3        2PX         0.10755   0.03368   0.31221   0.17729   0.00764
   4        2PY         0.17709   0.00231  -0.16126   0.31667  -0.00038
   5        2PZ        -0.27575  -0.01278   0.01490   0.22540   0.00224
   6        3S          0.02033  -0.01485  -0.00436   0.00830  -0.00061
   7        3PX         0.05081   0.02531   0.16717   0.08565   0.00283
   8        3PY         0.08537  -0.00716  -0.08601   0.15485   0.00287
   9        3PZ        -0.12553   0.00801   0.00608   0.11820   0.00247
  10        4XX         0.00416   0.00046  -0.00493  -0.00180  -0.00019
  11        4YY         0.00096  -0.00031   0.00539   0.00446   0.00010
  12        4ZZ        -0.00770  -0.00086  -0.00004  -0.00372   0.00004
  13        4XY        -0.00447  -0.00017   0.00039   0.01379   0.00028
  14        4XZ         0.00741  -0.00066  -0.00793   0.00410  -0.00014
  15        4YZ         0.01008   0.00144   0.00719   0.00301   0.00022
  16 2   C  1S          0.01031   0.00223   0.00203   0.01742   0.00011
  17        2S         -0.02286  -0.01156  -0.00338  -0.03976  -0.00019
  18        2PX        -0.12864  -0.03187   0.01461  -0.01234   0.00006
  19        2PY        -0.20478   0.00046  -0.02015  -0.01361   0.00133
  20        2PZ         0.30205   0.01720   0.00428  -0.01753   0.00082
  21        3S         -0.05269   0.01269  -0.01013  -0.05397  -0.00145
  22        3PX        -0.02980  -0.01470  -0.00421   0.00127  -0.00065
  23        3PY        -0.05168  -0.00782   0.00333   0.00116  -0.00122
  24        3PZ         0.07447   0.01540  -0.00198   0.01551  -0.00207
  25        4XX         0.00044   0.00397   0.01384   0.00369   0.00005
  26        4YY         0.00494  -0.00366  -0.01191   0.01343  -0.00008
  27        4ZZ        -0.00912  -0.00191  -0.00141  -0.01450  -0.00013
  28        4XY         0.00562   0.00184   0.00738   0.00981   0.00026
  29        4XZ         0.00523   0.00021  -0.00659   0.00164  -0.00016
  30        4YZ         0.00786   0.00121   0.00404   0.00102   0.00020
  31 3   N  1S          0.01376   0.00155   0.00117   0.00475  -0.00003
  32        2S         -0.02798  -0.00363  -0.00270  -0.01135   0.00020
  33        2PX        -0.01979  -0.01031  -0.00359  -0.00314  -0.00106
  34        2PY        -0.02977   0.00549  -0.00331  -0.00743   0.00109
  35        2PZ        -0.20786  -0.00641   0.00359   0.06994  -0.00067
  36        3S         -0.05186  -0.01564  -0.00072  -0.02373   0.00126
  37        3PX        -0.01555   0.00064  -0.00669   0.00311  -0.00165
  38        3PY        -0.02388   0.00723  -0.00044   0.00189   0.00143
  39        3PZ        -0.09931   0.00049   0.00021   0.03264  -0.00139
  40        4XX        -0.00078   0.00109   0.00183   0.00028   0.00008
  41        4YY        -0.00064  -0.00158  -0.00135   0.00206  -0.00002
  42        4ZZ         0.00469  -0.00049   0.00005  -0.00111   0.00018
  43        4XY         0.00029  -0.00004   0.00130   0.00174   0.00008
  44        4XZ         0.01117   0.00127  -0.00070  -0.00161   0.00010
  45        4YZ         0.01655   0.00009   0.00074  -0.00244  -0.00008
  46 4   O  1S          0.00279  -0.00019  -0.00247  -0.02554  -0.00045
  47        2S         -0.00050   0.00242   0.00561   0.05934   0.00071
  48        2PX         0.10603  -0.07405  -0.20929   0.07577  -0.00225
  49        2PY         0.11328   0.06736   0.16274   0.05393   0.00152
  50        2PZ         0.12430   0.00697   0.00520  -0.07471  -0.00263
  51        3S         -0.01170  -0.00781   0.01288   0.12095   0.00196
  52        3PX         0.06391  -0.05235  -0.14183   0.05162  -0.00126
  53        3PY         0.06611   0.04070   0.11069   0.03618   0.00045
  54        3PZ         0.08399   0.00164   0.00491  -0.04470  -0.00168
  55        4XX         0.00153  -0.00065  -0.00027  -0.00068  -0.00014
  56        4YY         0.00076   0.00148  -0.00085  -0.00236  -0.00026
  57        4ZZ         0.00161   0.00039  -0.00017  -0.00828  -0.00028
  58        4XY         0.00082  -0.00093   0.00033  -0.00229  -0.00012
  59        4XZ         0.01092  -0.00342  -0.01093   0.00508  -0.00015
  60        4YZ         0.01406   0.00363   0.00920   0.00451   0.00014
  61 5   O  1S          0.02201   0.00070   0.00024  -0.00754  -0.00032
  62        2S         -0.05122  -0.00133  -0.00140   0.01175   0.00063
  63        2PX        -0.09320  -0.06989  -0.22478   0.00399  -0.00259
  64        2PY        -0.15601   0.03587   0.14368  -0.06120   0.00216
  65        2PZ        -0.07217   0.00548   0.01753   0.13495   0.00353
  66        3S         -0.09520  -0.00374   0.00014   0.03919   0.00138
  67        3PX        -0.05419  -0.04840  -0.15737   0.00512  -0.00182
  68        3PY        -0.09354   0.02469   0.10238  -0.03936   0.00160
  69        3PZ        -0.04386   0.00333   0.01171   0.08581   0.00239
  70        4XX         0.00241  -0.00015  -0.00083   0.00019  -0.00005
  71        4YY         0.00527   0.00135   0.00168   0.00016  -0.00003
  72        4ZZ        -0.00239  -0.00057  -0.00162  -0.00806  -0.00019
  73        4XY         0.00558  -0.00015  -0.00068   0.00069  -0.00007
  74        4XZ         0.00230   0.00374   0.01155  -0.00050   0.00013
  75        4YZ         0.00478  -0.00224  -0.00751   0.00285  -0.00011
  76 6   O  1S          0.00143  -0.02389   0.00427  -0.00240  -0.01197
  77        2S         -0.00299   0.04979  -0.00948   0.00505   0.02199
  78        2PX         0.00695  -0.13887   0.01412   0.00813  -0.02685
  79        2PY         0.00145  -0.03978   0.00735  -0.00834  -0.08279
  80        2PZ         0.00420  -0.04001  -0.01271   0.00710  -0.04196
  81        3S         -0.00612   0.10602  -0.01580   0.00944   0.05866
  82        3PX         0.00505  -0.08982   0.01336   0.00550  -0.01662
  83        3PY         0.00068  -0.01836   0.00664  -0.00460  -0.05033
  84        3PZ         0.00285  -0.02313  -0.01059   0.00621  -0.02593
  85        4XX         0.00044  -0.01073   0.00202  -0.00037  -0.00152
  86        4YY         0.00010  -0.00139   0.00073  -0.00055  -0.00543
  87        4ZZ         0.00040  -0.00086   0.00019  -0.00047  -0.00201
  88        4XY         0.00045  -0.00895   0.00071   0.00037  -0.00346
  89        4XZ         0.00048  -0.00559   0.00091   0.00001  -0.00170
  90        4YZ         0.00025  -0.00254  -0.00084   0.00045  -0.00299
  91 7   O  1S          0.00106  -0.02859   0.00894   0.00158  -0.01091
  92        2S         -0.00153   0.05135  -0.01840  -0.00396   0.02581
  93        2PX         0.00399  -0.15597   0.04678   0.00002   0.09537
  94        2PY        -0.01998   0.31968  -0.04701  -0.00430   0.07839
  95        2PZ         0.00688   0.10244  -0.02578   0.00288   0.03558
  96        3S         -0.00535   0.13308  -0.03956  -0.00553   0.04709
  97        3PX         0.00388  -0.09894   0.02736   0.00170   0.05750
  98        3PY        -0.01281   0.20770  -0.02904  -0.00121   0.04854
  99        3PZ         0.00377   0.06699  -0.01738   0.00263   0.02092
 100        4XX        -0.00004  -0.00416   0.00244   0.00008   0.00152
 101        4YY         0.00111  -0.01541   0.00172   0.00092  -0.00624
 102        4ZZ         0.00030  -0.00167   0.00101  -0.00026  -0.00050
 103        4XY        -0.00112   0.01740  -0.00488  -0.00056  -0.00037
 104        4XZ         0.00057   0.00653  -0.00075  -0.00014  -0.00032
 105        4YZ        -0.00023  -0.00409   0.00007  -0.00014  -0.00296
 106 8   C  1S         -0.00066   0.01919  -0.00600  -0.00093   0.01692
 107        2S          0.00139  -0.04478   0.01374   0.00229  -0.03734
 108        2PX        -0.00691   0.13001  -0.03857   0.00098  -0.04599
 109        2PY        -0.01710   0.21836  -0.05216  -0.00068   0.13137
 110        2PZ         0.01050   0.10632  -0.01262  -0.00080   0.04291
 111        3S          0.00051  -0.02959   0.01210  -0.00045  -0.04769
 112        3PX        -0.00155   0.02869  -0.01176   0.00011  -0.01042
 113        3PY        -0.00515   0.05649  -0.01234  -0.00106   0.03388
 114        3PZ         0.00584   0.02687  -0.00273  -0.00050   0.01006
 115        4XX         0.00044  -0.01052   0.00115  -0.00043   0.01451
 116        4YY        -0.00098   0.01421  -0.00302   0.00010  -0.00750
 117        4ZZ         0.00000   0.00354  -0.00017  -0.00010  -0.00054
 118        4XY         0.00050  -0.00999   0.00092   0.00045   0.00598
 119        4XZ         0.00013  -0.00611   0.00188  -0.00020   0.00554
 120        4YZ         0.00008   0.00394  -0.00015  -0.00009  -0.00227
 121 9   N  1S          0.00206  -0.04677   0.01006   0.00112  -0.00237
 122        2S         -0.00451   0.10139  -0.02175  -0.00251   0.00046
 123        2PX        -0.00455   0.09063  -0.02756  -0.00167   0.02414
 124        2PY         0.00467  -0.14667   0.02841   0.00277  -0.17382
 125        2PZ         0.00999  -0.04604   0.01438   0.00067  -0.06788
 126        3S         -0.00700   0.16482  -0.03515  -0.00426   0.02452
 127        3PX        -0.00305   0.05930  -0.01798  -0.00127   0.01898
 128        3PY         0.00218  -0.07601   0.01531   0.00212  -0.08157
 129        3PZ         0.00566  -0.02217   0.00824   0.00068  -0.03073
 130        4XX         0.00057  -0.01106   0.00299   0.00019   0.00053
 131        4YY        -0.00034  -0.00050  -0.00052   0.00012  -0.00280
 132        4ZZ         0.00017   0.00232  -0.00033  -0.00008  -0.00022
 133        4XY        -0.00062   0.01529  -0.00346  -0.00023   0.01095
 134        4XZ        -0.00076   0.00408  -0.00119  -0.00008   0.00485
 135        4YZ         0.00048   0.00140   0.00004   0.00001   0.00073
 136 10  C  1S         -0.00042   0.00845  -0.00051   0.00016  -0.00297
 137        2S          0.00079  -0.01432   0.00077  -0.00007   0.00846
 138        2PX         0.00772  -0.20455   0.02856  -0.00256   0.31608
 139        2PY        -0.00411  -0.10120   0.01574   0.00264  -0.23917
 140        2PZ         0.02480  -0.06302   0.05192  -0.00628  -0.04298
 141        3S          0.00035  -0.02152  -0.00107  -0.00139   0.00998
 142        3PX         0.00419  -0.11456   0.01765  -0.00249   0.15727
 143        3PY        -0.00216  -0.04930   0.00695   0.00041  -0.12239
 144        3PZ         0.01281  -0.03418   0.02867  -0.00337  -0.02237
 145        4XX         0.00037  -0.00263   0.00078  -0.00021   0.01512
 146        4YY        -0.00034   0.00356  -0.00135   0.00025  -0.00546
 147        4ZZ        -0.00008  -0.00005   0.00047   0.00005  -0.01020
 148        4XY        -0.00018   0.00581  -0.00103   0.00009   0.00038
 149        4XZ        -0.00068   0.00132  -0.00120   0.00009   0.00686
 150        4YZ         0.00016   0.00368  -0.00002  -0.00010   0.00179
 151 11  H  1S          0.09024  -0.01446  -0.20243  -0.10264  -0.00496
 152        2S          0.06051   0.00197  -0.14040  -0.07276  -0.00452
 153        3PX         0.00706   0.00024  -0.00194  -0.00046  -0.00003
 154        3PY         0.00244   0.00011   0.00007   0.00997   0.00004
 155        3PZ        -0.00383  -0.00054  -0.00649   0.00237  -0.00015
 156 12  H  1S          0.08572   0.00907   0.04031   0.27803   0.00347
 157        2S          0.05381   0.01479   0.02728   0.20574  -0.00060
 158        3PX        -0.00033   0.00054   0.00643  -0.00555   0.00016
 159        3PY         0.00038  -0.00065  -0.00593  -0.00535  -0.00012
 160        3PZ        -0.00860  -0.00062  -0.00033   0.00085   0.00002
 161 13  H  1S          0.07740   0.01630   0.17312  -0.15336   0.00222
 162        2S          0.05329   0.02513   0.12160  -0.11278   0.00566
 163        3PX        -0.00010   0.00087   0.00174   0.00951  -0.00007
 164        3PY         0.00745   0.00043   0.00293   0.00182   0.00009
 165        3PZ        -0.00411   0.00063   0.00653   0.00022   0.00014
 166 14  H  1S         -0.09580  -0.00372   0.00299   0.03537  -0.00005
 167        2S         -0.08806  -0.00125   0.00210   0.03804   0.00050
 168        3PX        -0.00245  -0.00076  -0.00117   0.00075  -0.00004
 169        3PY        -0.00383   0.00053   0.00076   0.00075  -0.00001
 170        3PZ        -0.00447  -0.00026  -0.00003   0.00083   0.00002
 171 15  H  1S          0.10156   0.00443   0.00331  -0.00483  -0.00086
 172        2S          0.05188   0.00226   0.00243   0.00275  -0.00018
 173        3PX         0.00274  -0.00188  -0.00651  -0.00017  -0.00011
 174        3PY         0.00297   0.00134   0.00451  -0.00220   0.00002
 175        3PZ         0.00370   0.00038   0.00066   0.00318   0.00006
 176 16  H  1S          0.00768  -0.12623   0.02098  -0.00275   0.24767
 177        2S          0.00487  -0.07503   0.01251  -0.00145   0.19939
 178        3PX        -0.00031   0.00294  -0.00056   0.00008  -0.00633
 179        3PY        -0.00001  -0.00426   0.00076   0.00007  -0.00273
 180        3PZ         0.00054  -0.00056   0.00116  -0.00014  -0.00288
 181 17  H  1S         -0.01164  -0.02340  -0.01378   0.00405  -0.13046
 182        2S         -0.00766  -0.01045  -0.00894   0.00543  -0.10188
 183        3PX         0.00020  -0.00563   0.00069  -0.00003   0.00720
 184        3PY         0.00057  -0.00168   0.00111  -0.00017  -0.00013
 185        3PZ         0.00020  -0.00241   0.00080   0.00004  -0.00614
 186 18  H  1S          0.01169  -0.00805   0.02591  -0.00264  -0.15462
 187        2S          0.00755   0.00219   0.01737  -0.00121  -0.12175
 188        3PX         0.00046  -0.00587   0.00141  -0.00010   0.00408
 189        3PY        -0.00035  -0.00271  -0.00002   0.00013  -0.00401
 190        3PZ        -0.00005  -0.00157  -0.00009  -0.00002   0.00711
 191 19  H  1S         -0.00358   0.06363  -0.01101  -0.00061   0.08398
 192        2S         -0.00275   0.05006  -0.01056   0.00084   0.08300
 193        3PX        -0.00045   0.00865  -0.00177  -0.00021   0.00505
 194        3PY         0.00005  -0.00322   0.00080   0.00003  -0.00211
 195        3PZ         0.00023  -0.00005   0.00016   0.00001  -0.00019
                          31        32        33        34        35
                           O         O         O         O         O
     Eigenvalues --    -0.33353  -0.32835  -0.30753  -0.27609  -0.23588
   1 1   C  1S          0.01009  -0.00197   0.00259   0.00013   0.01104
   2        2S         -0.02755   0.00288  -0.00466   0.00066  -0.02366
   3        2PX         0.01440   0.02401  -0.02409   0.11381   0.01382
   4        2PY         0.02038  -0.01485   0.01767  -0.07946   0.02059
   5        2PZ        -0.14271  -0.01656   0.00200  -0.00495  -0.08007
   6        3S         -0.02436   0.02249  -0.02188  -0.00639  -0.05065
   7        3PX        -0.00791   0.00554  -0.01171   0.05947  -0.01123
   8        3PY        -0.01049  -0.01442   0.00729  -0.04032  -0.01402
   9        3PZ        -0.06023  -0.01952   0.01725  -0.00181  -0.06004
  10        4XX         0.00039  -0.00067   0.00040   0.00207   0.00095
  11        4YY        -0.00198   0.00045  -0.00065  -0.00238   0.00130
  12        4ZZ         0.00110  -0.00003  -0.00015   0.00039  -0.00120
  13        4XY        -0.00384  -0.00052   0.00010   0.00154   0.00022
  14        4XZ         0.00299  -0.00017   0.00062  -0.01190   0.00046
  15        4YZ         0.00442   0.00071  -0.00076   0.00853   0.00067
  16 2   C  1S          0.02580   0.00154  -0.00015   0.00122   0.03625
  17        2S         -0.06614  -0.00638  -0.00622  -0.00424  -0.09036
  18        2PX         0.05368   0.01555  -0.00531  -0.24256  -0.03031
  19        2PY         0.07216  -0.00952  -0.00021   0.16616  -0.04140
  20        2PZ         0.17141   0.01069  -0.00241   0.00407  -0.09986
  21        3S         -0.07777   0.00935   0.02266   0.00281  -0.03006
  22        3PX         0.00211   0.01013  -0.00145  -0.13717   0.03498
  23        3PY         0.00137  -0.00609  -0.01826   0.09572   0.04805
  24        3PZ         0.05569   0.01815   0.00829   0.00390   0.07023
  25        4XX        -0.00289   0.00068  -0.00041   0.00205   0.00574
  26        4YY        -0.00739  -0.00185  -0.00019  -0.00228   0.01296
  27        4ZZ         0.00675   0.00047  -0.00123   0.00038  -0.01008
  28        4XY        -0.00574   0.00026  -0.00001   0.00104   0.01203
  29        4XZ         0.01256   0.00088   0.00099  -0.01668   0.01699
  30        4YZ         0.01815   0.00089  -0.00037   0.01175   0.02547
  31 3   N  1S         -0.01308  -0.00024   0.00065  -0.00114  -0.07542
  32        2S          0.03415   0.00102  -0.00077   0.00251   0.16539
  33        2PX         0.06703   0.01792   0.00347  -0.26513   0.26610
  34        2PY         0.10138  -0.00424  -0.00218   0.18826   0.38785
  35        2PZ        -0.18009  -0.01101   0.00510   0.00698   0.17617
  36        3S          0.00994  -0.01384  -0.01384   0.00283   0.26378
  37        3PX         0.05027   0.01684   0.00854  -0.18454   0.20459
  38        3PY         0.07569  -0.00199   0.00473   0.13139   0.29715
  39        3PZ        -0.10397  -0.00086   0.00692   0.00655   0.17839
  40        4XX        -0.00079  -0.00040   0.00015   0.01030  -0.00319
  41        4YY        -0.00506  -0.00013  -0.00021  -0.01003  -0.01629
  42        4ZZ         0.00595  -0.00022  -0.00034  -0.00065  -0.00504
  43        4XY        -0.00638  -0.00087  -0.00045   0.00385  -0.02016
  44        4XZ         0.00228  -0.00080  -0.00013   0.01539  -0.00972
  45        4YZ         0.00327   0.00102  -0.00037  -0.01104  -0.01382
  46 4   O  1S         -0.04834  -0.00208   0.00153   0.00038  -0.00363
  47        2S          0.09899   0.00448  -0.00227  -0.00065   0.01847
  48        2PX        -0.05139  -0.01904  -0.00413  -0.04852   0.11483
  49        2PY        -0.05568   0.00984   0.00525   0.03667   0.14374
  50        2PZ        -0.35023  -0.01434   0.00691   0.00497   0.16567
  51        3S          0.23666   0.00984  -0.01733  -0.00261   0.04427
  52        3PX        -0.03309  -0.01368  -0.00503  -0.02517   0.09421
  53        3PY        -0.03570   0.00742  -0.00195   0.01911   0.11947
  54        3PZ        -0.23217  -0.01176   0.00089   0.00283   0.11543
  55        4XX        -0.00544   0.00043   0.00042  -0.01366   0.00149
  56        4YY        -0.01128  -0.00104   0.00022   0.01395   0.00102
  57        4ZZ        -0.01333  -0.00059   0.00021   0.00001   0.00580
  58        4XY        -0.00946  -0.00027  -0.00053  -0.00593   0.00041
  59        4XZ        -0.00115  -0.00109  -0.00055   0.00242   0.00000
  60        4YZ        -0.00098   0.00061   0.00000  -0.00122  -0.00027
  61 5   O  1S         -0.04688  -0.00197   0.00075  -0.00026  -0.01316
  62        2S          0.09671   0.00412  -0.00086   0.00089   0.04112
  63        2PX         0.06321  -0.02703  -0.01021   0.34272   0.00478
  64        2PY         0.06802   0.02297   0.00641  -0.23824   0.02614
  65        2PZ         0.40229   0.01921  -0.00551  -0.01342  -0.00901
  66        3S          0.22081   0.00954  -0.00529   0.00072   0.04881
  67        3PX         0.03973  -0.01966  -0.00786   0.25145  -0.00963
  68        3PY         0.04198   0.01559   0.00357  -0.17523   0.00157
  69        3PZ         0.26421   0.01199  -0.00380  -0.00988  -0.01569
  70        4XX        -0.00347   0.00008   0.00039  -0.00646   0.00357
  71        4YY        -0.00776  -0.00035   0.00041   0.00593   0.00370
  72        4ZZ        -0.01699  -0.00076   0.00042   0.00073  -0.00072
  73        4XY        -0.00719  -0.00032   0.00002  -0.00217   0.00039
  74        4XZ        -0.00321   0.00113   0.00045  -0.01061  -0.00412
  75        4YZ        -0.00341  -0.00114  -0.00036   0.00752  -0.00609
  76 6   O  1S          0.00010  -0.00081  -0.03829  -0.00204   0.00039
  77        2S         -0.00049   0.00079   0.06838   0.00632  -0.00149
  78        2PX        -0.00102  -0.02872  -0.21588   0.00076   0.00695
  79        2PY         0.00265  -0.06810  -0.19088  -0.00801  -0.00929
  80        2PZ        -0.01087   0.15343  -0.11354  -0.01204   0.00572
  81        3S         -0.00019   0.00533   0.19538   0.00519  -0.00047
  82        3PX        -0.00206  -0.02120  -0.14326   0.00284   0.00747
  83        3PY         0.00099  -0.04846  -0.11757  -0.00682  -0.00668
  84        3PZ        -0.00846   0.11234  -0.07115  -0.01069   0.00394
  85        4XX        -0.00006  -0.00210  -0.01276  -0.00062  -0.00011
  86        4YY        -0.00004  -0.00608  -0.01452   0.00056  -0.00046
  87        4ZZ        -0.00043   0.00668  -0.00673   0.00094  -0.00006
  88        4XY         0.00004  -0.00409  -0.01056  -0.00006  -0.00016
  89        4XZ        -0.00027   0.00551  -0.00609   0.00077   0.00008
  90        4YZ        -0.00053   0.00591  -0.00691  -0.00064   0.00014
  91 7   O  1S         -0.00021  -0.00035  -0.03304  -0.00362   0.00094
  92        2S         -0.00003   0.00101   0.06456   0.00911  -0.00386
  93        2PX         0.00425  -0.05000   0.08502  -0.00618  -0.01788
  94        2PY         0.00872  -0.14306   0.31648   0.00985   0.00686
  95        2PZ        -0.01703   0.37069   0.13280   0.02270   0.01303
  96        3S          0.00236  -0.00039   0.16607   0.01810  -0.00834
  97        3PX         0.00204  -0.03662   0.04244   0.00314  -0.02027
  98        3PY         0.00561  -0.09802   0.21293   0.00513   0.00851
  99        3PZ        -0.01167   0.25380   0.08703   0.01192   0.01382
 100        4XX         0.00000  -0.00263  -0.00241  -0.00091  -0.00126
 101        4YY        -0.00065   0.00804  -0.01994   0.00050  -0.00054
 102        4ZZ         0.00020  -0.00552  -0.00392   0.00065  -0.00067
 103        4XY        -0.00001  -0.00302  -0.00363   0.00009  -0.00004
 104        4XZ        -0.00059   0.01172  -0.00212   0.00219  -0.00067
 105        4YZ         0.00056  -0.01095  -0.00947  -0.00092  -0.00008
 106 8   C  1S         -0.00005  -0.00003   0.01540   0.00292  -0.00324
 107        2S          0.00004  -0.00003  -0.03948  -0.00753   0.00819
 108        2PX        -0.00072  -0.02007  -0.04999   0.00252   0.00995
 109        2PY        -0.00380  -0.04892  -0.22784  -0.01347  -0.00124
 110        2PZ        -0.00736   0.12073  -0.10158   0.02397  -0.01635
 111        3S         -0.00010   0.00122  -0.05146  -0.00991   0.00430
 112        3PX        -0.00048  -0.01603  -0.02454   0.00509  -0.01253
 113        3PY        -0.00105  -0.03361  -0.05404  -0.00773   0.00537
 114        3PZ        -0.00508   0.08571  -0.02695   0.01554  -0.01019
 115        4XX        -0.00014   0.00468   0.00823   0.00023  -0.00164
 116        4YY        -0.00044   0.00566  -0.00630   0.00055   0.00047
 117        4ZZ         0.00039  -0.01023  -0.00544  -0.00129   0.00114
 118        4XY        -0.00079   0.00806  -0.02864  -0.00134   0.00207
 119        4XZ         0.00070  -0.01638  -0.00937  -0.00107  -0.00049
 120        4YZ         0.00022  -0.00647  -0.00582  -0.00147   0.00192
 121 9   N  1S          0.00017   0.00018  -0.01604  -0.00365   0.00811
 122        2S         -0.00015  -0.00037   0.03965   0.00808  -0.01730
 123        2PX        -0.00059  -0.01294   0.01775   0.01205  -0.04015
 124        2PY         0.00613  -0.03446   0.19411  -0.00372   0.01554
 125        2PZ        -0.00156   0.08234   0.07850   0.02812  -0.02593
 126        3S         -0.00184  -0.00002   0.05001   0.01293  -0.03107
 127        3PX         0.00007  -0.00762   0.02131   0.00843  -0.02915
 128        3PY         0.00327  -0.02080   0.11199  -0.00435   0.01693
 129        3PZ        -0.00102   0.05129   0.04651   0.01889  -0.01747
 130        4XX         0.00001   0.00181  -0.00226  -0.00089   0.00278
 131        4YY         0.00016  -0.00288   0.00055  -0.00060   0.00075
 132        4ZZ        -0.00002   0.00120   0.00006   0.00068  -0.00085
 133        4XY        -0.00045   0.00214  -0.01246   0.00042  -0.00114
 134        4XZ         0.00016  -0.00687  -0.00550  -0.00166   0.00142
 135        4YZ        -0.00019   0.00386  -0.00246   0.00099  -0.00057
 136 10  C  1S          0.00024   0.00034   0.02193   0.00103  -0.00105
 137        2S         -0.00074  -0.00077  -0.05229  -0.00260   0.00268
 138        2PX        -0.00027   0.04676   0.16029   0.00362  -0.00048
 139        2PY        -0.00037   0.10318   0.20602   0.01305  -0.01067
 140        2PZ         0.01633  -0.26853   0.10444  -0.01043   0.00043
 141        3S         -0.00018  -0.00086  -0.08791  -0.00471   0.00581
 142        3PX        -0.00079   0.02889   0.06841  -0.00122   0.00350
 143        3PY        -0.00102   0.05913   0.10788   0.00799  -0.00985
 144        3PZ         0.00914  -0.15807   0.05023  -0.00544  -0.00335
 145        4XX         0.00008  -0.00169   0.00329  -0.00013   0.00001
 146        4YY        -0.00045   0.00806  -0.00451   0.00077  -0.00018
 147        4ZZ         0.00034  -0.00638  -0.00003  -0.00074   0.00033
 148        4XY        -0.00020   0.00158  -0.00767  -0.00001  -0.00002
 149        4XZ        -0.00027   0.00334  -0.00248  -0.00016   0.00010
 150        4YZ         0.00047  -0.01138  -0.00388  -0.00115   0.00068
 151 11  H  1S          0.04368  -0.00841   0.01504  -0.09888   0.01673
 152        2S          0.04733  -0.01156   0.02104  -0.09482   0.01394
 153        3PX         0.00231   0.00012   0.00032  -0.00112   0.00155
 154        3PY        -0.00118  -0.00008   0.00003  -0.00122   0.00057
 155        3PZ        -0.00235  -0.00072   0.00060  -0.00178  -0.00132
 156 12  H  1S         -0.02224   0.00000  -0.00164   0.00223  -0.00014
 157        2S         -0.00098   0.00077   0.00801   0.00281   0.04395
 158        3PX         0.00082   0.00047  -0.00054   0.00300   0.00022
 159        3PY         0.00104  -0.00040   0.00027  -0.00219   0.00028
 160        3PZ        -0.00247  -0.00026  -0.00010  -0.00023  -0.00032
 161 13  H  1S          0.04719   0.01888  -0.01703   0.09849   0.01720
 162        2S          0.05361  -0.00949   0.01091   0.10047   0.01431
 163        3PX        -0.00192  -0.00083   0.00007   0.00068  -0.00005
 164        3PY         0.00189   0.00070  -0.00058   0.00177   0.00168
 165        3PZ        -0.00206  -0.00030  -0.00004   0.00174  -0.00120
 166 14  H  1S         -0.09114  -0.00633   0.00160  -0.00173  -0.13550
 167        2S         -0.01756  -0.00075   0.00333  -0.00197  -0.08292
 168        3PX        -0.00288   0.00010   0.00019  -0.00743   0.00303
 169        3PY        -0.00428  -0.00027   0.00024   0.00521   0.00437
 170        3PZ        -0.00030  -0.00016  -0.00003   0.00023   0.00973
 171 15  H  1S         -0.13244  -0.00576   0.00160  -0.00024  -0.01502
 172        2S         -0.06373  -0.00279   0.00095  -0.00069  -0.03669
 173        3PX        -0.00415  -0.00112  -0.00029   0.01071  -0.00021
 174        3PY        -0.00623   0.00033   0.00026  -0.00747   0.00021
 175        3PZ         0.00403   0.00023  -0.00006  -0.00039   0.00134
 176 16  H  1S          0.00108  -0.00754   0.07474  -0.00113   0.00136
 177        2S          0.00105  -0.00709   0.08287   0.00159  -0.00308
 178        3PX        -0.00007   0.00159  -0.00015   0.00012  -0.00009
 179        3PY         0.00001   0.00254   0.00570   0.00021  -0.00003
 180        3PZ         0.00040  -0.00679   0.00191  -0.00033   0.00012
 181 17  H  1S         -0.00757   0.17357   0.03809   0.01248  -0.00635
 182        2S         -0.00540   0.13095   0.04484   0.01312  -0.00668
 183        3PX        -0.00008   0.00291   0.00352   0.00023  -0.00012
 184        3PY         0.00030  -0.00443   0.00299  -0.00011  -0.00002
 185        3PZ         0.00014  -0.00035   0.00430   0.00019  -0.00017
 186 18  H  1S          0.00994  -0.16453   0.03770  -0.00764   0.00091
 187        2S          0.00779  -0.12207   0.04740  -0.00833   0.00794
 188        3PX         0.00026  -0.00344   0.00409  -0.00017  -0.00003
 189        3PY        -0.00012   0.00427   0.00446   0.00035  -0.00026
 190        3PZ        -0.00009   0.00103  -0.00005   0.00001  -0.00008
 191 19  H  1S         -0.00226   0.00065  -0.10423  -0.00732   0.01380
 192        2S         -0.00178   0.00105  -0.08274  -0.00442   0.01214
 193        3PX        -0.00010  -0.00054  -0.00389  -0.00009  -0.00042
 194        3PY         0.00015  -0.00160   0.00178  -0.00049   0.00088
 195        3PZ        -0.00017   0.00391   0.00004   0.00067  -0.00048
                          36        37        38        39        40
                           O         O         O         O         O
     Eigenvalues --    -0.23074  -0.22781  -0.22037  -0.16521  -0.14332
   1 1   C  1S          0.00336  -0.00118  -0.00014  -0.00650  -0.00385
   2        2S         -0.00516   0.00374   0.00006   0.01510   0.00291
   3        2PX        -0.01799   0.01220   0.00190   0.01477   0.01233
   4        2PY         0.01477  -0.00194  -0.00145  -0.03273  -0.01723
   5        2PZ         0.00174  -0.00447   0.00169  -0.00445  -0.01170
   6        3S         -0.04053   0.00942   0.00052   0.05773   0.06701
   7        3PX        -0.00483  -0.00645  -0.01226   0.01036   0.01279
   8        3PY         0.01599   0.00679   0.01030  -0.04348  -0.03315
   9        3PZ         0.01836  -0.01667   0.00329  -0.04809  -0.03777
  10        4XX         0.00003  -0.00060  -0.00095  -0.00005  -0.00025
  11        4YY         0.00026   0.00101   0.00072   0.00076  -0.00057
  12        4ZZ         0.00006   0.00033  -0.00001   0.00107  -0.00042
  13        4XY         0.00003   0.00024  -0.00025   0.00063  -0.00030
  14        4XZ         0.00073  -0.00058  -0.00342  -0.00078  -0.00062
  15        4YZ        -0.00063   0.00064   0.00243   0.00034   0.00051
  16 2   C  1S          0.00222   0.00296  -0.00120   0.00026  -0.00043
  17        2S         -0.00154  -0.00269   0.00108   0.02687  -0.00461
  18        2PX         0.00212  -0.00482  -0.08105   0.01775  -0.00114
  19        2PY        -0.00382   0.00164   0.05695  -0.00682   0.00074
  20        2PZ        -0.00579  -0.00823   0.00611  -0.00268  -0.00233
  21        3S         -0.02672  -0.01618   0.00719  -0.09627   0.04206
  22        3PX        -0.00028   0.00079  -0.03901   0.00251   0.00254
  23        3PY         0.00204   0.01247   0.02414   0.07105  -0.00503
  24        3PZ        -0.02109  -0.00510   0.00239  -0.00022   0.03815
  25        4XX        -0.00188  -0.00246  -0.01739  -0.00016  -0.00057
  26        4YY         0.00403   0.00464   0.01548   0.00071  -0.00089
  27        4ZZ        -0.00086  -0.00013   0.00110   0.00512   0.00073
  28        4XY        -0.00045   0.00009  -0.00732   0.00029   0.00014
  29        4XZ        -0.00036  -0.00232  -0.02176  -0.00031  -0.00054
  30        4YZ         0.00244   0.00456   0.01434  -0.00222   0.00114
  31 3   N  1S         -0.00514  -0.00714   0.00312  -0.00061   0.00019
  32        2S          0.00990   0.01599  -0.00696  -0.00103   0.00438
  33        2PX        -0.00264  -0.01670  -0.28560   0.01601  -0.01047
  34        2PY         0.03513   0.06098   0.17312  -0.02467   0.01386
  35        2PZ         0.01102   0.01358  -0.00359  -0.01075   0.00109
  36        3S          0.04252   0.03488  -0.01537   0.02814  -0.04265
  37        3PX        -0.01149  -0.02239  -0.23669   0.00976  -0.00476
  38        3PY         0.02715   0.04710   0.14634  -0.04007   0.01624
  39        3PZ         0.00110   0.01064  -0.00237  -0.01679   0.01695
  40        4XX         0.00016   0.00104   0.01059  -0.00156   0.00154
  41        4YY        -0.00154  -0.00237  -0.00955   0.00116   0.00044
  42        4ZZ         0.00028   0.00013  -0.00044  -0.00033   0.00018
  43        4XY        -0.00045  -0.00079   0.00497   0.00127  -0.00043
  44        4XZ         0.00001   0.00069   0.01122  -0.00105   0.00013
  45        4YZ        -0.00121  -0.00209  -0.00702   0.00204  -0.00053
  46 4   O  1S         -0.00040  -0.00081   0.00022  -0.00250   0.00059
  47        2S          0.00104   0.00109  -0.00085  -0.00148  -0.00049
  48        2PX         0.06197   0.07496   0.34517   0.02311  -0.00434
  49        2PY        -0.02938  -0.03433  -0.25092  -0.01611   0.00147
  50        2PZ         0.00805   0.01028  -0.01941  -0.00414  -0.00123
  51        3S          0.00478   0.01206  -0.00304   0.06063  -0.00795
  52        3PX         0.04700   0.06007   0.26378   0.03166  -0.00346
  53        3PY        -0.02167  -0.02387  -0.19280   0.01105  -0.00077
  54        3PZ         0.00953   0.00973  -0.01534   0.00716  -0.00690
  55        4XX         0.00213   0.00204   0.01046  -0.00142   0.00038
  56        4YY        -0.00245  -0.00305  -0.01045  -0.00197   0.00035
  57        4ZZ         0.00046  -0.00008  -0.00038  -0.00156  -0.00022
  58        4XY         0.00111   0.00124   0.00437   0.00310  -0.00032
  59        4XZ         0.00046   0.00033   0.00142   0.00143  -0.00048
  60        4YZ        -0.00013  -0.00021  -0.00145   0.00008  -0.00051
  61 5   O  1S         -0.00084  -0.00128   0.00058  -0.00059  -0.00005
  62        2S          0.00253   0.00355  -0.00187  -0.00092   0.00019
  63        2PX        -0.05564  -0.06255  -0.29535  -0.01037   0.00062
  64        2PY         0.04046   0.04633   0.20545   0.00691   0.00108
  65        2PZ         0.00117   0.00230   0.01107  -0.00046  -0.00009
  66        3S          0.00260   0.00521  -0.00186   0.00847   0.00058
  67        3PX        -0.04418  -0.05018  -0.23534  -0.00548   0.00084
  68        3PY         0.03120   0.03544   0.16466   0.00951  -0.00081
  69        3PZ         0.00168   0.00141   0.00888  -0.00093  -0.00183
  70        4XX         0.00161   0.00166   0.00734  -0.00051  -0.00014
  71        4YY        -0.00119  -0.00140  -0.00752  -0.00174  -0.00001
  72        4ZZ        -0.00024  -0.00030  -0.00010  -0.00062   0.00011
  73        4XY         0.00061   0.00059   0.00297   0.00050  -0.00028
  74        4XZ         0.00043   0.00024   0.00159  -0.00009  -0.00004
  75        4YZ        -0.00073  -0.00097  -0.00111   0.00030  -0.00019
  76 6   O  1S         -0.00014  -0.00699   0.00179   0.00169  -0.00061
  77        2S          0.00190   0.02622  -0.00656  -0.00135   0.00031
  78        2PX         0.03142   0.02536  -0.01336   0.49477  -0.08110
  79        2PY         0.08783   0.00626  -0.00934  -0.34277  -0.20304
  80        2PZ        -0.20349   0.03126   0.02255  -0.06202   0.50765
  81        3S         -0.00259   0.00803  -0.00242  -0.00815   0.00457
  82        3PX         0.02288   0.00844  -0.01267   0.39529  -0.07035
  83        3PY         0.06551   0.00865  -0.00946  -0.26907  -0.17239
  84        3PZ        -0.15441   0.02301   0.01403  -0.04867   0.43487
  85        4XX         0.00146   0.00427  -0.00122   0.00802  -0.00151
  86        4YY         0.00537   0.00174  -0.00120  -0.00449  -0.00208
  87        4ZZ        -0.00492   0.00432  -0.00042   0.00108   0.00190
  88        4XY         0.00270   0.00563  -0.00143   0.00264  -0.00181
  89        4XZ        -0.00229   0.00289   0.00028   0.00213   0.00315
  90        4YZ        -0.00550   0.00094   0.00061  -0.00260   0.00201
  91 7   O  1S          0.00018   0.00089  -0.00283  -0.02535   0.00027
  92        2S         -0.00015   0.00544   0.00680   0.05382  -0.00105
  93        2PX         0.04453   0.18910  -0.05161  -0.08892   0.04283
  94        2PY         0.07479  -0.16664   0.02012   0.11711   0.11525
  95        2PZ        -0.21923  -0.01142   0.04256   0.02949  -0.28422
  96        3S          0.00414   0.02998   0.00804   0.13629   0.00065
  97        3PX         0.03805   0.15591  -0.02951  -0.04987   0.03433
  98        3PY         0.06190  -0.11918   0.00878   0.09401   0.09060
  99        3PZ        -0.17870  -0.00285   0.02939   0.02632  -0.22192
 100        4XX        -0.00066   0.00311  -0.00021  -0.02273   0.00474
 101        4YY        -0.00386   0.00510   0.00087   0.00797   0.00438
 102        4ZZ         0.00527   0.00033  -0.00007   0.00080  -0.00959
 103        4XY        -0.00245  -0.00204   0.00128  -0.00137   0.00845
 104        4XZ         0.00355  -0.00073   0.00095  -0.00476  -0.01746
 105        4YZ         0.00487   0.00118  -0.00112   0.00338  -0.00450
 106 8   C  1S          0.00212   0.03178  -0.00488   0.02520  -0.00023
 107        2S         -0.00552  -0.07911   0.01216  -0.06555   0.00109
 108        2PX        -0.04164  -0.08504   0.02770   0.12789   0.00664
 109        2PY        -0.09066   0.09018  -0.00589  -0.01124   0.02348
 110        2PZ         0.24632  -0.00518  -0.02754   0.01458  -0.05998
 111        3S          0.00133  -0.01344  -0.00909  -0.11910   0.00022
 112        3PX        -0.00948   0.08590  -0.00547   0.01176   0.00984
 113        3PY        -0.06170  -0.04678   0.01469  -0.04245   0.01399
 114        3PZ         0.13673  -0.02189  -0.01024  -0.01386  -0.04544
 115        4XX        -0.00295   0.02767  -0.00574   0.00196  -0.00436
 116        4YY         0.01408  -0.01645   0.00110  -0.00079   0.00866
 117        4ZZ        -0.01083  -0.00390   0.00213  -0.00083  -0.00412
 118        4XY        -0.00531  -0.01742   0.00408  -0.00407  -0.00532
 119        4XZ         0.01872  -0.00436  -0.00263  -0.00093   0.01751
 120        4YZ        -0.01991  -0.00672   0.00405  -0.00107  -0.01116
 121 9   N  1S         -0.00591  -0.07853   0.01437   0.00461  -0.00009
 122        2S          0.01310   0.16872  -0.03073  -0.00702   0.00065
 123        2PX        -0.02305   0.47069  -0.08284   0.07535  -0.02460
 124        2PY        -0.16261  -0.05206   0.03266   0.06856  -0.06390
 125        2PZ         0.39215   0.00042  -0.05413   0.04329   0.15913
 126        3S          0.01779   0.28260  -0.05225  -0.07839  -0.00276
 127        3PX        -0.01768   0.36637  -0.06650   0.08236  -0.02463
 128        3PY        -0.13103  -0.08648   0.03415   0.08709  -0.06700
 129        3PZ         0.30159  -0.01854  -0.03985   0.05083   0.16215
 130        4XX         0.00248  -0.03279   0.00557  -0.00302   0.00182
 131        4YY        -0.01070   0.00007   0.00161   0.00417  -0.00100
 132        4ZZ         0.00641   0.00555  -0.00182   0.00231  -0.00063
 133        4XY         0.00608   0.00870  -0.00237   0.00084   0.00234
 134        4XZ        -0.01956  -0.00105   0.00282  -0.00067  -0.00640
 135        4YZ         0.01378  -0.00402  -0.00097   0.00123   0.00149
 136 10  C  1S          0.00085   0.01243  -0.00271   0.00098  -0.00003
 137        2S         -0.00175  -0.02524   0.00487  -0.00766  -0.00038
 138        2PX         0.00835  -0.00043  -0.00237  -0.01433  -0.00373
 139        2PY         0.03339   0.07919  -0.01841  -0.00083  -0.00787
 140        2PZ        -0.06719   0.03794  -0.00015  -0.00341   0.02279
 141        3S         -0.00456  -0.07260   0.01761   0.03343   0.00253
 142        3PX        -0.00676  -0.02996   0.00309  -0.03471  -0.01037
 143        3PY         0.01332   0.06044  -0.01137  -0.02821  -0.00291
 144        3PZ        -0.01335   0.01793  -0.00268  -0.01934   0.01962
 145        4XX        -0.00043   0.00072  -0.00021  -0.00340  -0.00056
 146        4YY         0.00750  -0.00163  -0.00060   0.00271  -0.00193
 147        4ZZ        -0.00701   0.00160   0.00056  -0.00031   0.00240
 148        4XY         0.00204  -0.00090  -0.00003  -0.00235  -0.00161
 149        4XZ         0.00029  -0.00074   0.00001  -0.00155   0.00281
 150        4YZ        -0.00982   0.00002   0.00123   0.00112   0.00218
 151 11  H  1S          0.01148  -0.00700  -0.01188  -0.01204  -0.00551
 152        2S          0.01770  -0.02383  -0.03676  -0.03052  -0.01356
 153        3PX         0.00032   0.00004   0.00049  -0.00034  -0.00004
 154        3PY         0.00017   0.00033   0.00079  -0.00024  -0.00018
 155        3PZ         0.00024  -0.00054  -0.00043  -0.00042  -0.00022
 156 12  H  1S         -0.00134   0.00494   0.00014  -0.00526  -0.00355
 157        2S          0.00175  -0.00130  -0.00072   0.01093   0.00850
 158        3PX        -0.00040   0.00005  -0.00018   0.00071   0.00039
 159        3PY         0.00052  -0.00004   0.00014  -0.00084  -0.00066
 160        3PZ        -0.00004   0.00003  -0.00008   0.00037   0.00003
 161 13  H  1S         -0.01155   0.00813   0.01083   0.01180   0.00624
 162        2S          0.03067  -0.00002   0.03837  -0.06746  -0.07570
 163        3PX         0.00045  -0.00046  -0.00069  -0.00144  -0.00082
 164        3PY        -0.00066   0.00014  -0.00082   0.00230   0.00140
 165        3PZ         0.00047  -0.00005   0.00060  -0.00188  -0.00107
 166 14  H  1S         -0.00737  -0.01244   0.00507   0.00175  -0.00210
 167        2S         -0.00666  -0.00866   0.00389  -0.00679   0.00167
 168        3PX        -0.00054  -0.00123  -0.01020   0.00035  -0.00045
 169        3PY         0.00056   0.00121   0.00674  -0.00086   0.00049
 170        3PZ         0.00076   0.00093  -0.00025  -0.00045   0.00005
 171 15  H  1S         -0.00060  -0.00154   0.00042   0.00037  -0.00081
 172        2S         -0.00213  -0.00310   0.00155   0.00127   0.00010
 173        3PX        -0.00164  -0.00186  -0.00872  -0.00012  -0.00006
 174        3PY         0.00122   0.00137   0.00607   0.00045   0.00003
 175        3PZ         0.00015   0.00022   0.00025   0.00011  -0.00001
 176 16  H  1S         -0.00601  -0.00959   0.00126  -0.01804   0.00228
 177        2S          0.00068   0.03950  -0.00859  -0.00769   0.00815
 178        3PX         0.00041   0.00052  -0.00013  -0.00026  -0.00029
 179        3PY         0.00043  -0.00022  -0.00002  -0.00118  -0.00046
 180        3PZ        -0.00185   0.00012   0.00015  -0.00049   0.00114
 181 17  H  1S          0.07062   0.01387  -0.01028   0.00436  -0.01995
 182        2S          0.09722   0.01002  -0.01413   0.01685  -0.00955
 183        3PX         0.00071   0.00066  -0.00018  -0.00060  -0.00130
 184        3PY        -0.00095   0.00111  -0.00012   0.00021  -0.00039
 185        3PZ         0.00018   0.00174  -0.00034   0.00038  -0.00041
 186 18  H  1S         -0.06238   0.02943   0.00219   0.00610   0.01751
 187        2S         -0.09233   0.03107   0.00362   0.02286  -0.00032
 188        3PX        -0.00075   0.00128  -0.00021  -0.00056   0.00146
 189        3PY         0.00132   0.00157  -0.00046   0.00044   0.00050
 190        3PZ         0.00022  -0.00042   0.00008  -0.00040   0.00053
 191 19  H  1S         -0.01035  -0.14361   0.02768  -0.00966  -0.00016
 192        2S         -0.00869  -0.10808   0.02084   0.13359  -0.00170
 193        3PX        -0.00125   0.00485  -0.00065  -0.00619  -0.00102
 194        3PY        -0.00499  -0.00648   0.00190  -0.00023  -0.00284
 195        3PZ         0.01093  -0.00326  -0.00088  -0.00086   0.00717
                          41        42        43        44        45
                           V         V         V         V         V
     Eigenvalues --    -0.02643   0.00525   0.03004   0.05704   0.10531
   1 1   C  1S         -0.02438   0.00004   0.00153   0.00218   0.03977
   2        2S          0.05768  -0.00087  -0.00443  -0.00036  -0.07890
   3        2PX        -0.03041   0.02221  -0.00620  -0.00062   0.00343
   4        2PY        -0.04640  -0.01410  -0.00353   0.01410   0.00173
   5        2PZ         0.06070  -0.00256  -0.00006   0.00755  -0.00164
   6        3S          0.18303   0.00773  -0.02103  -0.04388  -0.44368
   7        3PX         0.02305   0.12397   0.01368  -0.02045  -0.02456
   8        3PY         0.02252  -0.08915  -0.01380   0.06758  -0.04543
   9        3PZ         0.08891  -0.01155   0.01039   0.03645   0.09820
  10        4XX        -0.00095  -0.01125   0.00045  -0.00018  -0.00010
  11        4YY        -0.00743   0.01248  -0.00100   0.00033  -0.00117
  12        4ZZ         0.00925  -0.00120  -0.00020   0.00059   0.00408
  13        4XY        -0.01184  -0.00572   0.00000   0.00006  -0.00169
  14        4XZ         0.00051   0.02769  -0.00083   0.00057   0.00029
  15        4YZ        -0.00024  -0.01947   0.00051  -0.00019  -0.00006
  16 2   C  1S          0.01014  -0.00158   0.00038  -0.00120  -0.00894
  17        2S         -0.01901   0.00676   0.00058  -0.00454  -0.01784
  18        2PX         0.06912   0.43981  -0.01270   0.00568   0.01339
  19        2PY         0.07867  -0.30916   0.00957  -0.00196   0.01608
  20        2PZ         0.03075  -0.01191   0.00057   0.00078  -0.00681
  21        3S         -0.05455   0.00032  -0.01161   0.02718   0.24042
  22        3PX         0.07157   0.42075  -0.02381  -0.00445  -0.04417
  23        3PY         0.08272  -0.28789   0.00702  -0.05175  -0.06019
  24        3PZ         0.10044  -0.01227  -0.00833  -0.03650   0.15143
  25        4XX         0.00519   0.00424   0.00021   0.00037   0.00317
  26        4YY         0.01035  -0.00577   0.00048   0.00050   0.00427
  27        4ZZ        -0.01734   0.00136  -0.00020  -0.00230  -0.01245
  28        4XY         0.00621   0.00262  -0.00011   0.00125   0.00234
  29        4XZ        -0.01605  -0.01918   0.00132   0.00045   0.00488
  30        4YZ        -0.02101   0.01347  -0.00062   0.00018   0.00787
  31 3   N  1S          0.01561  -0.00075  -0.00051  -0.00003   0.03654
  32        2S         -0.02494   0.00132   0.00216  -0.00020  -0.07316
  33        2PX         0.00258  -0.31660   0.01532   0.00240   0.06638
  34        2PY         0.01805   0.21830  -0.00804   0.00399   0.10094
  35        2PZ         0.04477   0.00600   0.00040   0.00264  -0.04009
  36        3S         -0.19277   0.01098   0.00976   0.01704  -0.51112
  37        3PX         0.00984  -0.39390   0.01247  -0.00327   0.15101
  38        3PY         0.03218   0.26647  -0.00990   0.01701   0.21992
  39        3PZ         0.05337   0.00723  -0.00399  -0.00943  -0.04262
  40        4XX         0.00202   0.00892  -0.00009  -0.00012   0.00462
  41        4YY         0.00141  -0.00904   0.00099  -0.00018   0.00372
  42        4ZZ         0.00852   0.00016   0.00087   0.00108   0.00333
  43        4XY        -0.00036   0.00424   0.00003  -0.00050  -0.00156
  44        4XZ        -0.00298  -0.01434   0.00028  -0.00010  -0.00430
  45        4YZ        -0.00395   0.01007  -0.00044  -0.00027  -0.00589
  46 4   O  1S         -0.07008   0.00130  -0.00008   0.00166   0.02257
  47        2S          0.17327  -0.00413   0.00052  -0.00367  -0.06374
  48        2PX        -0.14221  -0.18256   0.00499  -0.01202   0.03351
  49        2PY        -0.21600   0.13269  -0.00501   0.00945   0.04974
  50        2PZ         0.42173  -0.00567   0.00205   0.00167  -0.02996
  51        3S          0.51276  -0.00488  -0.00184  -0.03384  -0.19661
  52        3PX        -0.12295  -0.18398   0.00493  -0.01424   0.01220
  53        3PY        -0.19107   0.13650  -0.00783  -0.01121   0.02155
  54        3PZ         0.45596  -0.00475   0.00349  -0.00326  -0.10632
  55        4XX        -0.00272   0.01422  -0.00037   0.00006  -0.00041
  56        4YY        -0.01215  -0.01415   0.00032  -0.00153  -0.00377
  57        4ZZ        -0.00321  -0.00020   0.00021  -0.00054   0.00188
  58        4XY        -0.01131   0.00644  -0.00036  -0.00163  -0.00470
  59        4XZ         0.01624  -0.00021   0.00006  -0.00064   0.00188
  60        4YZ         0.02381  -0.00076  -0.00005   0.00009   0.00253
  61 5   O  1S          0.06879  -0.00175   0.00028   0.00103   0.06510
  62        2S         -0.17602   0.00395  -0.00052  -0.00132  -0.12982
  63        2PX        -0.15905   0.06280  -0.00256   0.00313   0.18821
  64        2PY        -0.25180  -0.03670   0.00055   0.00305   0.26593
  65        2PZ         0.41132  -0.00995   0.00187   0.00069   0.04482
  66        3S         -0.48161   0.01341  -0.00323  -0.01388  -0.69312
  67        3PX        -0.16586   0.04557  -0.00178   0.00407   0.25432
  68        3PY        -0.26253  -0.02318  -0.00041   0.00365   0.35790
  69        3PZ         0.44941  -0.01093   0.00296   0.00294   0.09720
  70        4XX         0.00289  -0.00476   0.00018   0.00041   0.02315
  71        4YY         0.01069   0.00424  -0.00009   0.00093   0.02633
  72        4ZZ         0.00283  -0.00052  -0.00005  -0.00001   0.01322
  73        4XY         0.01032  -0.00238   0.00003  -0.00032   0.00609
  74        4XZ        -0.01137   0.00382  -0.00014   0.00046   0.00787
  75        4YZ        -0.01667  -0.00189   0.00002  -0.00027   0.01167
  76 6   O  1S         -0.00015   0.00161  -0.00027   0.05722   0.00293
  77        2S         -0.00006  -0.00544   0.00083  -0.16531  -0.01707
  78        2PX         0.00066   0.03071  -0.01122  -0.28557   0.02354
  79        2PY        -0.00153  -0.00804  -0.03319  -0.39428  -0.00184
  80        2PZ         0.00062  -0.01707   0.08630  -0.19928   0.00927
  81        3S          0.00188  -0.00022   0.00121  -0.34328   0.00254
  82        3PX         0.00151   0.02492  -0.00942  -0.34147   0.00608
  83        3PY        -0.00001  -0.00040  -0.02853  -0.45767  -0.00246
  84        3PZ         0.00160  -0.01330   0.07477  -0.23379   0.00729
  85        4XX        -0.00046   0.00226   0.00038  -0.00994  -0.00229
  86        4YY         0.00003   0.00019   0.00312  -0.00083  -0.00482
  87        4ZZ        -0.00012  -0.00154  -0.00338  -0.00877  -0.00302
  88        4XY        -0.00008  -0.00150   0.00131   0.00643  -0.00144
  89        4XZ        -0.00013  -0.00108  -0.00133   0.00300   0.00011
  90        4YZ        -0.00004   0.00060  -0.00351   0.00577  -0.00127
  91 7   O  1S          0.00034   0.00107   0.00041  -0.07556   0.00494
  92        2S         -0.00024  -0.00165  -0.00090   0.17910  -0.01710
  93        2PX         0.00090   0.00300   0.03384  -0.15797   0.00336
  94        2PY         0.00176   0.00458   0.09634  -0.35025  -0.00493
  95        2PZ         0.00036   0.00018  -0.23215  -0.16789   0.00290
  96        3S         -0.00304  -0.00350  -0.00455   0.58462  -0.04110
  97        3PX         0.00105   0.00653   0.03338  -0.14487  -0.02617
  98        3PY         0.00133   0.00757   0.09872  -0.42639   0.01136
  99        3PZ         0.00016  -0.00437  -0.23810  -0.19605   0.00277
 100        4XX         0.00073   0.00192  -0.00330  -0.01257  -0.00339
 101        4YY        -0.00009   0.00083   0.00009  -0.01110  -0.00069
 102        4ZZ         0.00027   0.00017   0.00331  -0.00315  -0.00124
 103        4XY        -0.00017  -0.00171  -0.00524  -0.02758  -0.00054
 104        4XZ        -0.00006   0.00076   0.01327  -0.01359  -0.00013
 105        4YZ        -0.00004   0.00026  -0.00122  -0.01022  -0.00032
 106 8   C  1S         -0.00022   0.00008  -0.00098   0.01404  -0.00263
 107        2S          0.00059   0.00072   0.00060  -0.02247  -0.00073
 108        2PX        -0.00090  -0.00340  -0.06921   0.09952  -0.00874
 109        2PY         0.00066  -0.00566  -0.18994  -0.03869   0.00139
 110        2PZ        -0.00123   0.01620   0.47892  -0.00032  -0.00263
 111        3S          0.00270  -0.00116   0.01397  -0.07997   0.05453
 112        3PX         0.00054   0.00560  -0.06850   0.15823  -0.04246
 113        3PY         0.00073  -0.01604  -0.18465  -0.07777  -0.02067
 114        3PZ         0.00051   0.01518   0.47367  -0.01070  -0.01954
 115        4XX        -0.00016  -0.00028  -0.00130   0.01042   0.00163
 116        4YY         0.00014  -0.00054  -0.01342  -0.01220  -0.00131
 117        4ZZ        -0.00003   0.00059   0.01428   0.00214   0.00007
 118        4XY        -0.00010  -0.00002  -0.00437   0.02732  -0.00012
 119        4XZ        -0.00003  -0.00038   0.00244   0.01249  -0.00015
 120        4YZ        -0.00003   0.00061   0.01542  -0.00226  -0.00085
 121 9   N  1S         -0.00003   0.00091   0.00002   0.01756   0.00348
 122        2S          0.00015  -0.00162  -0.00004  -0.02241  -0.00625
 123        2PX         0.00041   0.00911   0.05144   0.02635   0.01012
 124        2PY        -0.00022   0.00783   0.13724  -0.03059   0.00044
 125        2PZ         0.00107  -0.00962  -0.34335  -0.00787   0.00265
 126        3S         -0.00032  -0.01749  -0.00051  -0.24826  -0.05033
 127        3PX         0.00036   0.01121   0.06376   0.06296   0.03509
 128        3PY        -0.00048   0.00957   0.17170  -0.04035   0.00275
 129        3PZ         0.00076  -0.01347  -0.43096  -0.00563   0.00884
 130        4XX         0.00003  -0.00001  -0.00145   0.00049  -0.00037
 131        4YY         0.00001  -0.00020  -0.01084   0.01118   0.00024
 132        4ZZ         0.00000   0.00056   0.01227   0.00499   0.00090
 133        4XY         0.00000  -0.00015  -0.00426   0.00056   0.00035
 134        4XZ        -0.00002   0.00025   0.00364  -0.00050  -0.00015
 135        4YZ        -0.00007   0.00034   0.01287   0.00350  -0.00042
 136 10  C  1S         -0.00023  -0.00002   0.00067  -0.03216   0.00772
 137        2S          0.00013  -0.00122  -0.00175   0.07324  -0.01318
 138        2PX        -0.00018  -0.00029  -0.00386  -0.00600  -0.00155
 139        2PY         0.00141   0.00135  -0.01397  -0.06870  -0.00603
 140        2PZ        -0.00032   0.00158   0.04311  -0.02365  -0.00123
 141        3S          0.00453   0.00832  -0.00607   0.28772  -0.09766
 142        3PX         0.00243  -0.00639  -0.01992   0.13980  -0.00959
 143        3PY         0.00414   0.00260  -0.06420  -0.10639  -0.03765
 144        3PZ        -0.00162   0.00584   0.17509  -0.00546  -0.01147
 145        4XX         0.00001  -0.00004   0.00091  -0.01626   0.00024
 146        4YY        -0.00008   0.00049   0.01992   0.00880   0.00006
 147        4ZZ         0.00001  -0.00075  -0.02097   0.00767   0.00046
 148        4XY        -0.00001   0.00029   0.00851  -0.00405  -0.00008
 149        4XZ         0.00005  -0.00027  -0.00692  -0.00658   0.00001
 150        4YZ        -0.00003  -0.00076  -0.02513   0.00017   0.00005
 151 11  H  1S          0.02807   0.11165   0.00113  -0.00058   0.01979
 152        2S          0.02604   0.32293   0.01872  -0.00760   0.26220
 153        3PX         0.00005   0.00167   0.00001  -0.00017  -0.00174
 154        3PY         0.00057   0.00246  -0.00034   0.00026   0.00060
 155        3PZ         0.00080  -0.00502   0.00043  -0.00017  -0.00161
 156 12  H  1S         -0.06976  -0.00119  -0.00356   0.00181   0.00292
 157        2S         -0.22580  -0.00353   0.01813  -0.04098   0.21161
 158        3PX        -0.00146  -0.00014   0.00011  -0.00006   0.00091
 159        3PY        -0.00228   0.00007  -0.00002   0.00040   0.00097
 160        3PZ         0.00388   0.00000   0.00000  -0.00011   0.00201
 161 13  H  1S          0.02555  -0.11050   0.00050   0.00257   0.01906
 162        2S          0.01647  -0.33963   0.00485   0.09609   0.25279
 163        3PX         0.00060  -0.00129   0.00022  -0.00071   0.00099
 164        3PY         0.00035  -0.00264   0.00021  -0.00010  -0.00121
 165        3PZ         0.00088   0.00482  -0.00026   0.00057  -0.00160
 166 14  H  1S          0.02088  -0.00236  -0.00056  -0.00047   0.05432
 167        2S          0.12328  -0.00863  -0.00197   0.00796   0.50131
 168        3PX        -0.00051  -0.01336   0.00062   0.00025  -0.00518
 169        3PY        -0.00016   0.00911  -0.00055   0.00000  -0.00742
 170        3PZ         0.00152   0.00023   0.00022   0.00022   0.00221
 171 15  H  1S          0.03427  -0.00118   0.00009   0.00246   0.21845
 172        2S          0.17246  -0.00501   0.00115   0.01631   1.19987
 173        3PX        -0.00655   0.00204  -0.00008  -0.00006  -0.01121
 174        3PY        -0.01013  -0.00103   0.00003  -0.00007  -0.01519
 175        3PZ         0.01294  -0.00030   0.00007  -0.00016  -0.01652
 176 16  H  1S         -0.00025  -0.00042  -0.00878  -0.08025   0.00374
 177        2S         -0.00219   0.00156  -0.03009  -0.39990   0.05035
 178        3PX         0.00005  -0.00001  -0.00027  -0.00365   0.00036
 179        3PY         0.00001  -0.00005  -0.00018  -0.00432  -0.00023
 180        3PZ         0.00002  -0.00005   0.00008  -0.00214   0.00002
 181 17  H  1S          0.00017   0.00361   0.11294   0.02838   0.00191
 182        2S         -0.00750   0.00763   0.37860   0.01808   0.06449
 183        3PX        -0.00001   0.00013   0.00214   0.00148  -0.00025
 184        3PY         0.00006   0.00022   0.00535  -0.00100   0.00007
 185        3PZ        -0.00003   0.00010   0.00240  -0.00083  -0.00037
 186 18  H  1S          0.00029  -0.00329  -0.10492   0.03402   0.00291
 187        2S         -0.00003  -0.01696  -0.34697   0.02280   0.05784
 188        3PX        -0.00001  -0.00007  -0.00163   0.00201  -0.00030
 189        3PY         0.00001  -0.00007  -0.00481  -0.00099  -0.00007
 190        3PZ        -0.00003   0.00004  -0.00201   0.00084   0.00032
 191 19  H  1S         -0.00027  -0.00003  -0.00004   0.02093   0.00224
 192        2S          0.00017   0.01686   0.00009   0.19002   0.04217
 193        3PX        -0.00003  -0.00054   0.00195   0.00149  -0.00020
 194        3PY        -0.00001   0.00026   0.00506  -0.00131  -0.00017
 195        3PZ         0.00005  -0.00062  -0.01276  -0.00026   0.00000
                          46        47        48        49        50
                           V         V         V         V         V
     Eigenvalues --     0.12989   0.13967   0.15266   0.16864   0.17955
   1 1   C  1S         -0.09767   0.08445   0.02884  -0.00295  -0.00775
   2        2S          0.16736  -0.15064  -0.05711   0.00654   0.01135
   3        2PX         0.02997   0.05634  -0.19505   0.02278  -0.20313
   4        2PY         0.04184   0.03848  -0.28964  -0.00216   0.23098
   5        2PZ        -0.11581   0.12705  -0.01420  -0.01205   0.13966
   6        3S          1.43422  -1.22982  -0.41693   0.03945   0.10931
   7        3PX         0.08272   0.13892  -0.56349   0.07066  -0.60982
   8        3PY         0.14047   0.12757  -0.83621  -0.01558   0.69128
   9        3PZ        -0.36137   0.36528   0.01542  -0.04094   0.46092
  10        4XX        -0.00603   0.00314   0.00715   0.00000  -0.00558
  11        4YY        -0.00094  -0.00443   0.01720  -0.00208   0.01264
  12        4ZZ        -0.00350   0.00856  -0.02006   0.00210  -0.00875
  13        4XY         0.00736  -0.01221   0.02004  -0.00039  -0.00982
  14        4XZ        -0.00256   0.00098   0.00724   0.00017  -0.00641
  15        4YZ        -0.00306   0.00097   0.00978  -0.00111   0.00745
  16 2   C  1S          0.00941  -0.01095   0.01361   0.00014   0.00909
  17        2S          0.02864  -0.01718  -0.02723   0.00390  -0.03700
  18        2PX        -0.01001   0.05049  -0.11965   0.00602   0.04454
  19        2PY        -0.01463   0.06454  -0.17149   0.02172  -0.14438
  20        2PZ        -0.01348   0.02064  -0.02544   0.00176   0.00506
  21        3S         -0.26223   0.27823  -0.31040  -0.00594  -0.12658
  22        3PX         0.00555   0.05300  -0.21886   0.01663   0.05446
  23        3PY        -0.00298   0.11285  -0.30903   0.05924  -0.41941
  24        3PZ        -0.12075   0.03273   0.19099  -0.00642   0.01279
  25        4XX        -0.00404   0.00749  -0.00959   0.00110  -0.00975
  26        4YY        -0.00139   0.00756  -0.01897   0.00029   0.00893
  27        4ZZ         0.01385  -0.02387   0.03268  -0.00143   0.00032
  28        4XY         0.00312   0.00227  -0.01406   0.00175  -0.00635
  29        4XZ        -0.00067   0.00321  -0.00743   0.00065  -0.00204
  30        4YZ        -0.00275   0.00640  -0.01210   0.00159  -0.01351
  31 3   N  1S         -0.02095   0.03105  -0.04006   0.00448  -0.03661
  32        2S          0.04054  -0.06065   0.07370  -0.00796   0.06232
  33        2PX         0.01926   0.01011  -0.04172   0.00608  -0.07523
  34        2PY         0.01713   0.00629  -0.06263   0.00564  -0.03511
  35        2PZ        -0.01715   0.00692   0.02395  -0.00996   0.09077
  36        3S          0.30940  -0.39256   0.44175  -0.05725   0.52868
  37        3PX        -0.04182   0.05199  -0.04531   0.01374  -0.19672
  38        3PY        -0.05190   0.06631  -0.07212   0.00617  -0.07962
  39        3PZ        -0.07479   0.03344   0.04582  -0.01668   0.11902
  40        4XX        -0.00234   0.00248  -0.00241   0.00062  -0.00693
  41        4YY        -0.00091   0.00237  -0.00250   0.00025  -0.00207
  42        4ZZ        -0.00107   0.00919  -0.02291   0.00213  -0.01135
  43        4XY         0.00140  -0.00087   0.00118   0.00028  -0.00084
  44        4XZ         0.00312  -0.00616   0.00974  -0.00094   0.00310
  45        4YZ         0.00423  -0.00843   0.01493  -0.00177   0.01302
  46 4   O  1S          0.00095  -0.00616   0.01997  -0.00302   0.01129
  47        2S         -0.00019   0.01053  -0.05486   0.00490  -0.01503
  48        2PX         0.01361   0.03019  -0.10342   0.01271  -0.07802
  49        2PY         0.01997   0.03607  -0.15651   0.01025   0.02786
  50        2PZ        -0.04252   0.01030   0.08058  -0.00185  -0.02177
  51        3S          0.00271   0.05870  -0.17908   0.04301  -0.19176
  52        3PX         0.02480   0.02570  -0.11544   0.01899  -0.09182
  53        3PY         0.03901   0.03033  -0.16848   0.01784  -0.01085
  54        3PZ        -0.01137  -0.00232   0.01956   0.00714  -0.06896
  55        4XX        -0.00035  -0.00103  -0.00038  -0.00146   0.01041
  56        4YY         0.00286  -0.00422   0.00078  -0.00041  -0.00453
  57        4ZZ         0.00313  -0.00365   0.00068  -0.00082   0.00370
  58        4XY         0.00507  -0.00502   0.00195   0.00020  -0.00084
  59        4XZ         0.00207  -0.00162   0.00171  -0.00022   0.00136
  60        4YZ         0.00246  -0.00236   0.00196  -0.00049   0.00538
  61 5   O  1S          0.01142  -0.00836   0.00800  -0.00027  -0.00355
  62        2S         -0.01826   0.01329  -0.01923   0.00000   0.01663
  63        2PX         0.06502  -0.04229   0.00247  -0.00371   0.04458
  64        2PY         0.09195  -0.05816  -0.00091  -0.00385   0.04816
  65        2PZ         0.02902  -0.05955   0.11835  -0.01161   0.06206
  66        3S         -0.16112   0.12522  -0.09669   0.00809  -0.02427
  67        3PX         0.09380  -0.06562   0.02034  -0.00669   0.07731
  68        3PY         0.13215  -0.09056   0.02410  -0.00834   0.09734
  69        3PZ         0.04476  -0.07340   0.12992  -0.01128   0.05249
  70        4XX         0.00596  -0.00393   0.00054  -0.00041   0.00380
  71        4YY         0.00664  -0.00472   0.00202  -0.00055   0.00627
  72        4ZZ         0.00148  -0.00129   0.00179  -0.00007  -0.00267
  73        4XY         0.00157  -0.00110   0.00151  -0.00007   0.00083
  74        4XZ         0.00172   0.00110  -0.00754   0.00058  -0.00140
  75        4YZ         0.00275   0.00175  -0.01091   0.00113  -0.00726
  76 6   O  1S         -0.01524  -0.00077  -0.00222   0.01058   0.01754
  77        2S          0.06060  -0.01606   0.00579  -0.02940  -0.07316
  78        2PX        -0.00870   0.07020   0.00947  -0.03483   0.00830
  79        2PY         0.01758  -0.03301  -0.01354  -0.13098   0.03427
  80        2PZ        -0.03336   0.03603  -0.01174  -0.06484   0.06641
  81        3S          0.04656   0.04378   0.01349  -0.07594  -0.04866
  82        3PX         0.02844   0.06126   0.01228  -0.04166  -0.04721
  83        3PY         0.01947  -0.01612  -0.01142  -0.14714   0.01509
  84        3PZ        -0.01112   0.02491  -0.00849  -0.06986   0.02449
  85        4XX         0.00573  -0.00503   0.00160  -0.00166  -0.01039
  86        4YY         0.00837  -0.00875  -0.00079   0.00318  -0.01144
  87        4ZZ         0.00461  -0.00492  -0.00031  -0.00197  -0.00700
  88        4XY         0.00421  -0.00362   0.00221   0.00721  -0.01020
  89        4XZ        -0.00210   0.00252   0.00148   0.00320  -0.00045
  90        4YZ         0.00324  -0.00346   0.00140   0.00518  -0.00562
  91 7   O  1S         -0.01420   0.00348  -0.00115   0.00011  -0.00025
  92        2S          0.04766  -0.01277  -0.00091  -0.01004  -0.01316
  93        2PX         0.00879   0.01022  -0.00787  -0.15225   0.01643
  94        2PY         0.04869   0.02344  -0.02058  -0.13099   0.01435
  95        2PZ         0.00135   0.02669   0.01057  -0.06327   0.00172
  96        3S          0.13921  -0.01697   0.02065   0.04214   0.06539
  97        3PX         0.11247   0.00302   0.00066  -0.12970   0.02965
  98        3PY        -0.01483   0.01754  -0.00259  -0.10412  -0.02045
  99        3PZ         0.00471   0.01040   0.01150  -0.05381  -0.01675
 100        4XX         0.01254   0.00257  -0.00191  -0.00066  -0.00337
 101        4YY         0.00240   0.00011   0.00050  -0.00050  -0.00091
 102        4ZZ         0.00068  -0.00491  -0.00402  -0.00484  -0.00241
 103        4XY         0.00242  -0.00281  -0.00190  -0.00412   0.00586
 104        4XZ         0.00141   0.00211  -0.00063  -0.00193   0.00376
 105        4YZ         0.00484  -0.00097  -0.00013   0.00032   0.00014
 106 8   C  1S          0.01499   0.00494   0.00603   0.01986  -0.00401
 107        2S          0.02130   0.03219   0.00625  -0.01609   0.00827
 108        2PX         0.01172  -0.03162  -0.01420  -0.12319   0.04017
 109        2PY        -0.00095   0.00536   0.00010  -0.02505   0.01106
 110        2PZ         0.01226  -0.00561  -0.01990  -0.03532   0.03253
 111        3S         -0.36344  -0.18431  -0.15123  -0.44436   0.10948
 112        3PX         0.10873  -0.07203  -0.03329  -0.15342   0.14167
 113        3PY         0.09203   0.03215  -0.01692  -0.28548  -0.01514
 114        3PZ         0.07642  -0.00289  -0.05166  -0.15438   0.05642
 115        4XX        -0.00554  -0.00009  -0.00095  -0.02612   0.00464
 116        4YY         0.01282   0.01145   0.00466   0.02862  -0.00088
 117        4ZZ        -0.00215  -0.00267  -0.00003   0.00208  -0.00371
 118        4XY        -0.00175  -0.00047   0.00176   0.00151  -0.00866
 119        4XZ         0.00049  -0.00079   0.00099  -0.00152  -0.00400
 120        4YZ         0.00791   0.00713   0.00353   0.01503  -0.00184
 121 9   N  1S         -0.03021  -0.02294  -0.01325  -0.02887   0.03474
 122        2S          0.05848   0.04811   0.02601   0.05684  -0.05613
 123        2PX        -0.04142   0.00301  -0.01542  -0.08020   0.08049
 124        2PY        -0.00136   0.00104  -0.01451  -0.01232   0.11487
 125        2PZ        -0.01184   0.00072  -0.00055  -0.02133   0.04679
 126        3S          0.40371   0.28102   0.16479   0.29337  -0.53760
 127        3PX        -0.19534  -0.07524  -0.06013  -0.07898   0.23541
 128        3PY         0.00530   0.01962  -0.01842  -0.02762   0.17534
 129        3PZ        -0.03854   0.00061   0.00174  -0.01865   0.08680
 130        4XX         0.00124   0.00002   0.00015   0.00563   0.00061
 131        4YY        -0.00333  -0.00260  -0.00217  -0.01691   0.00887
 132        4ZZ        -0.00557  -0.00275  -0.00246  -0.00587   0.00807
 133        4XY        -0.00455  -0.00537  -0.00287  -0.00608   0.00638
 134        4XZ        -0.00062  -0.00206  -0.00037   0.00026   0.00084
 135        4YZ         0.00098  -0.00132  -0.00099  -0.00651   0.00264
 136 10  C  1S         -0.08898  -0.09931  -0.03338   0.00676   0.00049
 137        2S          0.14564   0.16185   0.05674  -0.01837  -0.00565
 138        2PX         0.01685   0.01636  -0.00675  -0.40144  -0.08036
 139        2PY         0.10311   0.13307   0.01739   0.04119   0.12494
 140        2PZ         0.03193   0.05248   0.03774  -0.01984  -0.00691
 141        3S          1.29457   1.51816   0.50254  -0.08855   0.04857
 142        3PX         0.04445   0.03495  -0.06750  -1.19933  -0.23778
 143        3PY         0.36785   0.38154   0.04116   0.06370   0.36175
 144        3PZ         0.11381   0.14537   0.10636  -0.07919  -0.02587
 145        4XX         0.00113   0.00186   0.00166   0.02620   0.00244
 146        4YY        -0.00247  -0.00368  -0.00211  -0.01299   0.00322
 147        4ZZ        -0.00762  -0.00840  -0.00219  -0.01007  -0.00648
 148        4XY         0.00305   0.00406   0.00046  -0.00887  -0.00075
 149        4XZ         0.00272   0.00426   0.00248   0.00707   0.00039
 150        4YZ         0.00192   0.00388   0.00091  -0.00587   0.00516
 151 11  H  1S         -0.06544   0.07286  -0.03199   0.00595  -0.05981
 152        2S         -0.80151   0.86302  -0.07555   0.03613  -0.66043
 153        3PX         0.00905  -0.00767  -0.00724   0.00061   0.00122
 154        3PY        -0.00196   0.00587  -0.01342   0.00015   0.00675
 155        3PZ         0.00049  -0.00163   0.00177  -0.00094   0.01201
 156 12  H  1S         -0.02335  -0.02655   0.18668  -0.01131  -0.01948
 157        2S         -0.61835   0.05844   1.54700  -0.04984  -0.42080
 158        3PX        -0.00239   0.00115   0.00801   0.00035  -0.01340
 159        3PY        -0.00253   0.00013   0.00998  -0.00133   0.00635
 160        3PZ        -0.00736   0.00638   0.00534  -0.00036   0.00079
 161 13  H  1S         -0.06027   0.07491  -0.03768  -0.00754   0.10607
 162        2S         -0.79530   0.78675  -0.15548  -0.09958   1.25746
 163        3PX        -0.00460   0.00738  -0.01017   0.00015   0.00217
 164        3PY         0.00746  -0.00396  -0.01045   0.00158  -0.00878
 165        3PZ         0.00084  -0.00165   0.00232  -0.00019  -0.00261
 166 14  H  1S         -0.03533   0.06218  -0.09388   0.01287  -0.08936
 167        2S         -0.15393   0.33267  -0.59566   0.08466  -0.71503
 168        3PX        -0.00051  -0.00049   0.00305  -0.00044   0.00231
 169        3PY        -0.00154  -0.00111   0.00468  -0.00066   0.00548
 170        3PZ        -0.00130   0.00469  -0.00997   0.00099  -0.00658
 171 15  H  1S          0.05662  -0.03111  -0.00454  -0.00033   0.01184
 172        2S          0.36653  -0.27267   0.14958  -0.02271   0.19715
 173        3PX        -0.00313   0.00236  -0.00130   0.00020  -0.00143
 174        3PY        -0.00420   0.00318  -0.00188   0.00028  -0.00194
 175        3PZ        -0.00418   0.00184   0.00228  -0.00005   0.00039
 176 16  H  1S         -0.02045  -0.01701   0.00398   0.17592   0.02186
 177        2S         -0.49507  -0.52993  -0.12137   1.67205   0.37789
 178        3PX        -0.00400  -0.00449  -0.00201   0.01192   0.00293
 179        3PY         0.00532   0.00702   0.00164  -0.00451   0.00062
 180        3PZ         0.00083   0.00165   0.00149   0.00303  -0.00094
 181 17  H  1S         -0.04683  -0.06358  -0.02044  -0.03402  -0.02992
 182        2S         -0.77649  -0.86160  -0.15786  -0.27278  -0.42281
 183        3PX         0.00191   0.00152  -0.00053  -0.01609  -0.00173
 184        3PY        -0.00233  -0.00354  -0.00159  -0.00228   0.00070
 185        3PZ         0.00667   0.00865   0.00274   0.00195   0.00539
 186 18  H  1S         -0.05185  -0.06246  -0.02857  -0.06317  -0.01331
 187        2S         -0.73148  -0.87116  -0.36515  -0.56600  -0.21573
 188        3PX         0.00393   0.00487   0.00175  -0.01213  -0.00124
 189        3PY         0.00163   0.00227  -0.00008  -0.00055   0.00525
 190        3PZ        -0.00598  -0.00763  -0.00273  -0.00933  -0.00357
 191 19  H  1S         -0.03759  -0.04256  -0.02372  -0.05381   0.07263
 192        2S         -0.33250  -0.21755  -0.18230  -0.46172   0.75923
 193        3PX         0.00067  -0.00031   0.00061   0.00112  -0.00426
 194        3PY         0.00228   0.00220   0.00148   0.00862  -0.00412
 195        3PZ         0.00061   0.00108   0.00077   0.00314  -0.00231
                          51        52        53        54        55
                           V         V         V         V         V
     Eigenvalues --     0.18207   0.18762   0.19094   0.21531   0.23756
   1 1   C  1S         -0.00836  -0.00567   0.00112   0.06170  -0.01653
   2        2S          0.01141   0.01875   0.00018  -0.04890   0.00689
   3        2PX         0.30137   0.06085   0.10946   0.05417  -0.04513
   4        2PY        -0.06869   0.04725  -0.13079   0.12697   0.01554
   5        2PZ         0.17805   0.07151  -0.11899  -0.18159  -0.03605
   6        3S          0.11905   0.04249  -0.00790  -1.08151   0.36148
   7        3PX         0.90735   0.17983   0.35128   0.45231  -0.04239
   8        3PY        -0.20517   0.14513  -0.36468   0.78459  -0.07851
   9        3PZ         0.58280   0.19072  -0.34164  -0.81122   0.05953
  10        4XX         0.01725   0.00336   0.00328  -0.00189   0.00056
  11        4YY        -0.00857  -0.00132  -0.00613   0.00643  -0.00271
  12        4ZZ        -0.01141  -0.00111   0.00172   0.00208  -0.00526
  13        4XY        -0.00580  -0.00564   0.00940   0.00861   0.00056
  14        4XZ         0.00621  -0.00062   0.00223  -0.02253   0.00111
  15        4YZ        -0.00431  -0.00130  -0.00616  -0.03071   0.00098
  16 2   C  1S          0.00773   0.00222  -0.01928  -0.15817   0.00212
  17        2S         -0.04252  -0.01309   0.02670   0.23940  -0.02520
  18        2PX        -0.16282  -0.01874  -0.07060  -0.09479  -0.04505
  19        2PY        -0.02726  -0.01188   0.06372  -0.14420  -0.01856
  20        2PZ         0.00346  -0.00146  -0.01881  -0.20999   0.01391
  21        3S         -0.09703  -0.01266   0.33898   2.76808   0.00508
  22        3PX        -0.45176  -0.06442  -0.08778  -0.16954  -0.02606
  23        3PY        -0.17426  -0.05540   0.12771  -0.22627  -0.07950
  24        3PZ         0.00608  -0.04131  -0.05113  -0.62659   0.21648
  25        4XX         0.00960   0.00158   0.00502   0.01063  -0.00220
  26        4YY        -0.01032   0.00072  -0.00872  -0.00838  -0.00430
  27        4ZZ        -0.00059  -0.00280   0.00003  -0.00684   0.00071
  28        4XY         0.00104   0.00091  -0.00057  -0.03346  -0.00286
  29        4XZ        -0.01457  -0.00369   0.00114  -0.00431  -0.00004
  30        4YZ        -0.01056  -0.00440   0.00725  -0.00625  -0.00003
  31 3   N  1S         -0.04933  -0.01765   0.02110   0.02869   0.00450
  32        2S          0.08424   0.02855  -0.03461  -0.07128  -0.01001
  33        2PX        -0.01925  -0.01598   0.05343   0.03147  -0.01891
  34        2PY        -0.10963  -0.03134   0.02680   0.04475   0.01083
  35        2PZ         0.12915   0.05122  -0.03784   0.17508  -0.00229
  36        3S          0.71746   0.27846  -0.32255  -0.32772  -0.15874
  37        3PX        -0.04545  -0.05951   0.13143   0.07350   0.04078
  38        3PY        -0.27989  -0.10432   0.07529   0.09645   0.04629
  39        3PZ         0.17990   0.06457  -0.03376   0.42274   0.04808
  40        4XX        -0.00360  -0.00220   0.00528   0.00477   0.00207
  41        4YY        -0.00843  -0.00236   0.00060  -0.00672  -0.00235
  42        4ZZ        -0.01531  -0.00407   0.00520  -0.00640  -0.00532
  43        4XY         0.00083   0.00055  -0.00221  -0.01818  -0.00184
  44        4XZ         0.01320   0.00297   0.00097   0.00547   0.00169
  45        4YZ         0.01083   0.00383  -0.00645   0.00924   0.00090
  46 4   O  1S          0.01514   0.00294   0.00325   0.06419   0.00274
  47        2S         -0.01664   0.00026  -0.00575  -0.11447  -0.00131
  48        2PX         0.04327   0.00882   0.01507  -0.19280  -0.00176
  49        2PY        -0.06261   0.00339  -0.05320  -0.26590  -0.00770
  50        2PZ        -0.04101  -0.02027   0.00979  -0.05870  -0.01005
  51        3S         -0.26889  -0.06710  -0.04121  -0.90694  -0.03713
  52        3PX         0.00132  -0.00142  -0.00776  -0.38777  -0.00975
  53        3PY        -0.10510  -0.00801  -0.07692  -0.54535  -0.00251
  54        3PZ        -0.09982  -0.03081   0.02232  -0.09591  -0.03782
  55        4XX         0.00102   0.00183  -0.00265   0.02688   0.00168
  56        4YY         0.00969   0.00155   0.00724   0.02642   0.00419
  57        4ZZ         0.00522   0.00219  -0.00103  -0.00342   0.00101
  58        4XY        -0.00699  -0.00182  -0.00101   0.00197   0.00036
  59        4XZ         0.00542   0.00171  -0.00137   0.00279  -0.00038
  60        4YZ         0.00550   0.00240  -0.00266   0.00536   0.00059
  61 5   O  1S         -0.00535  -0.00274   0.00309   0.00026   0.00005
  62        2S          0.02536   0.01161  -0.01171  -0.00139  -0.00099
  63        2PX         0.04886   0.02217  -0.02747  -0.00517  -0.00292
  64        2PY         0.08084   0.03176  -0.02866  -0.00990  -0.00248
  65        2PZ         0.08577   0.02651  -0.02361   0.06380  -0.00347
  66        3S         -0.03389  -0.00746  -0.00009  -0.03690   0.01010
  67        3PX         0.09670   0.04117  -0.04870  -0.01896  -0.00645
  68        3PY         0.14786   0.05926  -0.06288  -0.03132  -0.00910
  69        3PZ         0.07297   0.02251  -0.01593   0.07418  -0.01414
  70        4XX         0.00702   0.00257  -0.00188  -0.00180   0.00032
  71        4YY         0.00713   0.00303  -0.00420  -0.00965  -0.00031
  72        4ZZ        -0.00300  -0.00172   0.00266   0.00785   0.00076
  73        4XY         0.00184   0.00076  -0.00186  -0.01222  -0.00008
  74        4XZ        -0.00763  -0.00173   0.00038  -0.00151   0.00007
  75        4YZ        -0.00572  -0.00192   0.00345  -0.00275   0.00040
  76 6   O  1S         -0.00004  -0.00120   0.01415   0.00141   0.00903
  77        2S          0.00019   0.00149  -0.03258  -0.02101  -0.03612
  78        2PX        -0.01174   0.01964  -0.10313   0.04963   0.04654
  79        2PY        -0.00692  -0.00211   0.11780  -0.01715  -0.09336
  80        2PZ        -0.00412  -0.00315  -0.00665  -0.01473  -0.03587
  81        3S         -0.00548   0.01023  -0.10381   0.02579  -0.07073
  82        3PX        -0.01436   0.01927  -0.13906   0.02162   0.02262
  83        3PY        -0.00106   0.00401   0.07592  -0.00936  -0.11128
  84        3PZ        -0.00329  -0.00824  -0.00809  -0.00168  -0.04270
  85        4XX        -0.00064  -0.00081  -0.00240  -0.00087  -0.00963
  86        4YY         0.00205  -0.00328   0.00387  -0.00894  -0.00095
  87        4ZZ        -0.00215   0.00222  -0.00004  -0.00741  -0.00313
  88        4XY        -0.00085  -0.00149  -0.00857  -0.00147  -0.00197
  89        4XZ         0.00021  -0.00004  -0.00738  -0.00226  -0.00279
  90        4YZ        -0.00062   0.00173   0.00191   0.00005   0.00054
  91 7   O  1S          0.00253   0.00381  -0.00632   0.00312   0.06070
  92        2S         -0.00775  -0.00303  -0.00747  -0.00387  -0.11096
  93        2PX        -0.00191  -0.02816   0.03763  -0.00709  -0.33778
  94        2PY        -0.00040  -0.02389  -0.02192   0.01180   0.02086
  95        2PZ        -0.02487   0.11743   0.01254  -0.00258  -0.04926
  96        3S         -0.02315  -0.06754   0.18677  -0.07122  -0.87212
  97        3PX        -0.02597  -0.04910   0.05806  -0.04095  -0.68046
  98        3PY         0.00748  -0.02823  -0.05574   0.01665   0.03639
  99        3PZ        -0.03165   0.10676   0.00436  -0.00014  -0.08804
 100        4XX        -0.00091   0.00434  -0.00178  -0.00262   0.01576
 101        4YY        -0.00138   0.00237  -0.00768   0.00082   0.00166
 102        4ZZ         0.00005  -0.00046  -0.00886   0.00197   0.01961
 103        4XY        -0.00284   0.00373   0.00583  -0.00007  -0.00584
 104        4XZ         0.00337  -0.00787   0.00150  -0.00137  -0.00345
 105        4YZ        -0.00089  -0.00268   0.00233   0.00091  -0.01041
 106 8   C  1S         -0.00445  -0.00872  -0.01691   0.00235  -0.15775
 107        2S          0.00803   0.00258   0.04709  -0.01108   0.20916
 108        2PX        -0.01749   0.01590   0.09077  -0.02248  -0.15569
 109        2PY        -0.01341   0.07386   0.04992  -0.01093   0.14187
 110        2PZ         0.03871  -0.16997   0.00563  -0.00065   0.04036
 111        3S          0.08104   0.17956   0.37019  -0.04099   2.90423
 112        3PX        -0.02358   0.03210   0.41462  -0.12444  -0.26108
 113        3PY        -0.04122   0.19336   0.09378  -0.03006   0.45609
 114        3PZ         0.10144  -0.38472   0.03893  -0.02568   0.15959
 115        4XX         0.00198  -0.00598   0.01355  -0.00025  -0.03210
 116        4YY         0.00174  -0.00760  -0.00720   0.00088   0.00306
 117        4ZZ        -0.00194   0.01085  -0.00090  -0.00002   0.02409
 118        4XY         0.00187  -0.00599  -0.01397   0.00082   0.01096
 119        4XZ        -0.00353   0.01060  -0.00052   0.00047  -0.00657
 120        4YZ        -0.00196   0.00524  -0.00409   0.00056  -0.01155
 121 9   N  1S          0.00388  -0.00185   0.06549  -0.00722   0.02772
 122        2S         -0.00781   0.00408  -0.10838   0.01181  -0.06595
 123        2PX         0.00869  -0.00486   0.13981  -0.00846   0.09263
 124        2PY         0.00641  -0.04303   0.17830  -0.01818  -0.17460
 125        2PZ        -0.01323   0.05495   0.10026  -0.00992  -0.05878
 126        3S         -0.05405   0.02144  -1.00720   0.11349  -0.37420
 127        3PX         0.03284  -0.03113   0.38206  -0.01836   0.20407
 128        3PY         0.01367  -0.10855   0.23137  -0.01039  -0.46127
 129        3PZ        -0.03855   0.14555   0.17334  -0.00992  -0.16210
 130        4XX         0.00030  -0.00239  -0.00075  -0.00025  -0.01038
 131        4YY        -0.00073   0.00239   0.01909  -0.00296  -0.00862
 132        4ZZ         0.00077  -0.00065   0.01378  -0.00110   0.01031
 133        4XY         0.00089  -0.00325   0.01177  -0.00203  -0.01082
 134        4XZ        -0.00150   0.00543   0.00397  -0.00095  -0.00911
 135        4YZ         0.00040  -0.00519   0.00468  -0.00103  -0.01271
 136 10  C  1S          0.00565   0.00397   0.00442  -0.00404   0.05704
 137        2S         -0.00962  -0.00383  -0.00125   0.00341  -0.03360
 138        2PX         0.00399  -0.03140  -0.08712   0.00617   0.06589
 139        2PY         0.04283  -0.15433   0.16302  -0.01421   0.17640
 140        2PZ        -0.10277   0.39486   0.11089  -0.01168   0.04810
 141        3S         -0.08178  -0.07421  -0.04007   0.08028  -1.05307
 142        3PX         0.03779  -0.07083  -0.26616   0.02064   0.66925
 143        3PY         0.13232  -0.44693   0.55464  -0.09026   0.91136
 144        3PZ        -0.30761   1.19079   0.35356  -0.04794   0.38632
 145        4XX         0.00188  -0.00805  -0.00216   0.00061   0.00174
 146        4YY        -0.00128   0.00443   0.01065  -0.00201   0.00633
 147        4ZZ        -0.00025   0.00353  -0.00800   0.00045  -0.00050
 148        4XY         0.00105  -0.00225   0.00015  -0.00031   0.03349
 149        4XZ        -0.00434   0.01788   0.00528  -0.00067   0.01414
 150        4YZ         0.00218  -0.00872   0.00835  -0.00154   0.01150
 151 11  H  1S          0.11167   0.02074   0.02149  -0.05216   0.00195
 152        2S          1.32812   0.22421   0.27162  -0.09853  -0.14749
 153        3PX        -0.01026  -0.00169   0.00071   0.00701   0.00311
 154        3PY         0.00258   0.00340  -0.00510   0.00674  -0.00186
 155        3PZ        -0.00057   0.00163  -0.00690  -0.00369   0.00237
 156 12  H  1S         -0.03972  -0.03569   0.02687  -0.01948  -0.00935
 157        2S         -0.68092  -0.36772   0.25952  -0.16310  -0.03298
 158        3PX         0.00811  -0.00140   0.00867   0.00364  -0.00037
 159        3PY        -0.01170  -0.00370  -0.00204   0.00794  -0.00012
 160        3PZ        -0.00065  -0.00083  -0.00317  -0.02112   0.00008
 161 13  H  1S         -0.03905   0.01134  -0.07827  -0.04102  -0.02001
 162        2S         -0.44417   0.10647  -0.80151   0.05714  -0.08422
 163        3PX         0.00937   0.00378  -0.00240   0.00411  -0.00025
 164        3PY         0.00208   0.00035   0.00503   0.00753   0.00075
 165        3PZ         0.01258   0.00227   0.00310  -0.00493   0.00079
 166 14  H  1S         -0.12154  -0.04114   0.03546  -0.07426  -0.00270
 167        2S         -0.99808  -0.36818   0.39340  -0.06990   0.03085
 168        3PX         0.00548   0.00149  -0.00034   0.00398  -0.00062
 169        3PY         0.00599   0.00202  -0.00261   0.00569   0.00130
 170        3PZ        -0.00884  -0.00242   0.00380   0.00446  -0.00140
 171 15  H  1S          0.01663   0.00845  -0.01347  -0.05782  -0.00275
 172        2S          0.27827   0.10713  -0.11733  -0.06514  -0.02104
 173        3PX        -0.00200  -0.00075   0.00091   0.00295  -0.00014
 174        3PY        -0.00274  -0.00104   0.00144   0.00453   0.00000
 175        3PZ         0.00032   0.00006  -0.00076  -0.00428  -0.00037
 176 16  H  1S          0.00414  -0.01541   0.00631   0.00146  -0.01328
 177        2S          0.08200  -0.18696   0.38152  -0.04876  -0.04154
 178        3PX         0.00193  -0.00478   0.00149  -0.00015   0.00612
 179        3PY         0.00146  -0.00549   0.00017   0.00015   0.02025
 180        3PZ        -0.00457   0.01871   0.00350  -0.00036   0.00754
 181 17  H  1S         -0.02616   0.11384  -0.01752   0.00169  -0.05691
 182        2S         -0.34824   1.42658  -0.25582   0.01189  -0.17072
 183        3PX         0.00166  -0.00673  -0.00205  -0.00009   0.00649
 184        3PY        -0.00200   0.00963   0.00473  -0.00102   0.00242
 185        3PZ         0.00017  -0.00263   0.00905  -0.00092   0.00507
 186 18  H  1S          0.02964  -0.10046  -0.04701   0.00313  -0.04963
 187        2S          0.35873  -1.23773  -0.66633   0.05210  -0.01831
 188        3PX        -0.00293   0.01079   0.00364  -0.00066   0.00739
 189        3PY         0.00223  -0.00870   0.00726  -0.00111   0.00554
 190        3PZ         0.00089  -0.00204  -0.00534   0.00013   0.00108
 191 19  H  1S          0.00307  -0.01341   0.13374  -0.01831  -0.09887
 192        2S          0.04736  -0.07391   1.35707  -0.13841  -0.20081
 193        3PX        -0.00002   0.00038  -0.00584   0.00033   0.00424
 194        3PY        -0.00026  -0.00003  -0.01023   0.00184  -0.00049
 195        3PZ        -0.00016   0.00067  -0.00519   0.00068   0.00036
                          56        57        58        59        60
                           V         V         V         V         V
     Eigenvalues --     0.27097   0.28215   0.39579   0.42847   0.52256
   1 1   C  1S         -0.07075   0.03233  -0.01164  -0.00307   0.00251
   2        2S          0.03480  -0.00916  -0.10090   0.01882   0.04864
   3        2PX         0.01143  -0.05634   0.00761  -0.04939   0.27534
   4        2PY         0.04425  -0.01421   0.03042   0.01365  -0.22806
   5        2PZ         0.01415  -0.07924  -0.22011  -0.00916   0.19240
   6        3S          1.74389  -0.90766   1.26824  -0.08183  -0.12763
   7        3PX        -0.20043   0.19970  -0.72031   0.18702  -0.65762
   8        3PY        -0.44567   0.19516  -1.04803   0.08266   0.23343
   9        3PZ         1.04363  -0.80499   0.01126   0.00552  -0.31013
  10        4XX         0.00975  -0.00675  -0.01944   0.00595  -0.02465
  11        4YY         0.00072  -0.00915  -0.03939  -0.00131   0.03004
  12        4ZZ        -0.03357   0.02396   0.04068  -0.00554   0.01162
  13        4XY        -0.00687   0.00545  -0.02774   0.00399  -0.00856
  14        4XZ         0.01077  -0.00675   0.01045   0.00137  -0.02043
  15        4YZ         0.01613  -0.01403   0.01412  -0.00639   0.03250
  16 2   C  1S          0.01136  -0.00256  -0.04528   0.00695  -0.00115
  17        2S         -0.10230   0.02123  -0.05303  -0.03185   0.22956
  18        2PX        -0.23206   0.11556   0.09867  -0.06065   0.42199
  19        2PY        -0.27657   0.26955   0.14250   0.03732  -0.41174
  20        2PZ         0.16998  -0.11753   0.26328  -0.04173   0.11946
  21        3S         -0.15110   0.14282   1.81191  -0.16316   0.04845
  22        3PX        -0.70149   0.58808   0.47172  -0.02614  -0.14108
  23        3PY        -1.04511   0.81640   0.58549  -0.10320   0.66239
  24        3PZ         1.19947  -0.65463   3.36995  -0.37187   0.35161
  25        4XX         0.00108  -0.00404   0.01311  -0.00237  -0.00753
  26        4YY        -0.00783  -0.00090   0.00540  -0.00518   0.02388
  27        4ZZ        -0.00580   0.00208  -0.04235   0.00375   0.03507
  28        4XY        -0.01198   0.00849  -0.01162   0.00264  -0.00076
  29        4XZ        -0.00428   0.00370  -0.00528   0.00043  -0.00124
  30        4YZ        -0.00406   0.00607  -0.00619   0.00403  -0.03250
  31 3   N  1S          0.03970  -0.02759   0.09291  -0.01205   0.01622
  32        2S         -0.05601   0.03751  -0.15489   0.01566  -0.00779
  33        2PX         0.05270  -0.08189  -0.13020  -0.01966   0.15367
  34        2PY         0.10288  -0.08396  -0.18684   0.02628  -0.09810
  35        2PZ        -0.04876   0.04293   0.28486  -0.03202  -0.01413
  36        3S         -1.07740   0.66139  -2.83733   0.33640  -0.42195
  37        3PX         0.41135  -0.29137   0.08339   0.00537  -0.08341
  38        3PY         0.56809  -0.44394   0.07832  -0.02349   0.01793
  39        3PZ         0.14644  -0.02769   1.85391  -0.21454   0.37159
  40        4XX         0.01241  -0.00660   0.01043   0.00058  -0.01381
  41        4YY        -0.00093  -0.00288   0.00132  -0.00363   0.01325
  42        4ZZ        -0.00982   0.00125  -0.01370  -0.00357   0.01007
  43        4XY        -0.01613   0.01159  -0.01283   0.00144  -0.00449
  44        4XZ         0.01188  -0.00695  -0.00563   0.00249  -0.01715
  45        4YZ         0.01490  -0.01554  -0.00692  -0.00337   0.03569
  46 4   O  1S          0.03960  -0.03429  -0.01780   0.00111  -0.00493
  47        2S         -0.07010   0.07194   0.00573   0.01387  -0.02218
  48        2PX        -0.05842   0.06331   0.05439  -0.00009   0.03411
  49        2PY        -0.08499   0.08212   0.07565   0.00260  -0.06081
  50        2PZ        -0.06344   0.04107  -0.09903   0.01217  -0.05015
  51        3S         -0.61631   0.51149   0.49649  -0.08460   0.31250
  52        3PX        -0.17139   0.15794   0.22782  -0.03072   0.10991
  53        3PY        -0.23542   0.22510   0.33381  -0.03364   0.08113
  54        3PZ        -0.28287   0.18847  -0.37548   0.03694   0.01637
  55        4XX         0.01302  -0.01026  -0.00691   0.00206   0.00372
  56        4YY         0.01093  -0.00265  -0.01403   0.00670  -0.01734
  57        4ZZ         0.00291  -0.00033  -0.01750   0.00506  -0.00156
  58        4XY        -0.00750   0.00373  -0.01214  -0.00141   0.02678
  59        4XZ         0.00133  -0.00327   0.00616  -0.00342   0.02293
  60        4YZ         0.00357  -0.00296   0.00894  -0.00131   0.00010
  61 5   O  1S          0.00573  -0.00548  -0.01211   0.00115  -0.00260
  62        2S         -0.02718   0.02618   0.05374  -0.00516   0.03023
  63        2PX        -0.03853   0.02891   0.02339  -0.00546   0.05469
  64        2PY        -0.04926   0.04297   0.03554  -0.00119  -0.00267
  65        2PZ        -0.04930   0.03644   0.04217  -0.00406   0.00287
  66        3S          0.02947  -0.00787   0.13226  -0.01114  -0.02505
  67        3PX        -0.09228   0.07244   0.03705  -0.00084  -0.02064
  68        3PY        -0.12768   0.10089   0.06138  -0.00523   0.01702
  69        3PZ        -0.10007   0.06172  -0.14431   0.01509  -0.01551
  70        4XX        -0.00052   0.00231   0.01536  -0.00069  -0.00071
  71        4YY        -0.00551   0.00600   0.01829  -0.00164   0.00819
  72        4ZZ         0.00361  -0.00246  -0.00004  -0.00065   0.01164
  73        4XY        -0.00616   0.00600   0.00532   0.00020  -0.00381
  74        4XZ         0.00428  -0.00387  -0.00454   0.00029  -0.00126
  75        4YZ         0.00626  -0.00501  -0.00580   0.00026   0.00347
  76 6   O  1S          0.00922   0.01178  -0.00177   0.01588   0.00037
  77        2S         -0.06807  -0.02508  -0.01204  -0.11417   0.23888
  78        2PX         0.02755  -0.05128   0.00507  -0.02097  -0.17688
  79        2PY         0.01696   0.04111  -0.00891  -0.00127   0.08239
  80        2PZ        -0.00190   0.00658  -0.04876  -0.00058  -0.00120
  81        3S          0.02345  -0.08434   0.03062  -0.07876  -0.38830
  82        3PX        -0.04965  -0.06847   0.00082  -0.04444   0.06112
  83        3PY         0.04883   0.04609   0.00012  -0.15228  -0.04957
  84        3PZ         0.01173   0.00709   0.00422  -0.06904  -0.01266
  85        4XX        -0.01125   0.00006  -0.00316  -0.02574   0.05928
  86        4YY        -0.01793   0.00546  -0.00662  -0.02687   0.10435
  87        4ZZ        -0.01471   0.00757  -0.00859  -0.03064   0.08774
  88        4XY        -0.00624  -0.00467   0.00024  -0.01058   0.01653
  89        4XZ        -0.00431  -0.00327  -0.00640  -0.00301   0.00013
  90        4YZ        -0.00338  -0.00196   0.00451  -0.00091   0.01432
  91 7   O  1S          0.03195   0.04789  -0.00270   0.03517   0.00967
  92        2S         -0.07317  -0.09974  -0.01927  -0.02954   0.09096
  93        2PX        -0.04300  -0.13090   0.07686  -0.08269  -0.28558
  94        2PY         0.04676   0.06597  -0.05439  -0.13612   0.09703
  95        2PZ         0.00501   0.00698  -0.03592  -0.06706  -0.03274
  96        3S         -0.44842  -0.65712   0.06986  -0.98895  -0.17484
  97        3PX        -0.23659  -0.35875  -0.01085  -0.55660   0.09868
  98        3PY         0.19849   0.25618  -0.02230  -0.31842  -0.14312
  99        3PZ         0.05172   0.04557  -0.00168  -0.20974  -0.02531
 100        4XX        -0.00634   0.00444  -0.01011   0.00401   0.09033
 101        4YY         0.00059   0.00389  -0.01342   0.01705   0.03903
 102        4ZZ         0.00561   0.01228  -0.01370   0.01573   0.03608
 103        4XY        -0.00641  -0.00774  -0.00509   0.00745   0.00926
 104        4XZ        -0.00525  -0.00480  -0.00576   0.00269   0.00779
 105        4YZ        -0.00263  -0.00658   0.00334   0.00271   0.00843
 106 8   C  1S          0.01706  -0.00192   0.01304   0.04080  -0.01627
 107        2S         -0.06784  -0.05362   0.00908  -0.03199   0.12490
 108        2PX        -0.23144  -0.32706   0.01222  -0.23082  -0.20756
 109        2PY        -0.16888  -0.22507   0.04658   0.27503  -0.04906
 110        2PZ        -0.10532  -0.13355   0.02021   0.07734  -0.06618
 111        3S         -0.34590  -0.04273  -0.28193  -1.75824  -0.30120
 112        3PX        -0.80281  -1.00006  -0.03493  -2.10822  -0.02713
 113        3PY        -0.83362  -1.07952   0.25396   2.77054   0.48443
 114        3PZ        -0.45285  -0.56712   0.10075   0.80189   0.20084
 115        4XX        -0.00333  -0.01760   0.01905   0.01021  -0.07123
 116        4YY        -0.00324  -0.00419   0.00079   0.00968   0.02314
 117        4ZZ         0.00489   0.01111  -0.00463  -0.01258   0.01967
 118        4XY         0.00540   0.01143  -0.00335  -0.01276   0.00843
 119        4XZ         0.00190  -0.00133   0.00552  -0.00162  -0.00881
 120        4YZ        -0.00267  -0.00681   0.00283   0.01035   0.00333
 121 9   N  1S          0.01881   0.03614  -0.01241  -0.10076  -0.00423
 122        2S         -0.03337  -0.07207   0.02958   0.17194  -0.01804
 123        2PX         0.07819   0.12194  -0.00084   0.16001   0.06275
 124        2PY         0.01901   0.01421   0.02526   0.23671   0.07582
 125        2PZ         0.02082   0.02360   0.00954   0.12542   0.03617
 126        3S         -0.43710  -0.74930   0.28291   2.96593   0.33916
 127        3PX         0.43533   0.63607  -0.10919  -0.59181  -0.07280
 128        3PY         0.02864  -0.04344   0.16171   1.73604   0.15756
 129        3PZ         0.07654   0.07198   0.04669   0.60851   0.05342
 130        4XX         0.00200   0.00159   0.00144   0.01410   0.00847
 131        4YY        -0.01017  -0.01469   0.00383   0.00832  -0.00774
 132        4ZZ         0.00488   0.00751  -0.00085  -0.01025  -0.00772
 133        4XY        -0.00932  -0.01418   0.00384  -0.00603  -0.01677
 134        4XZ        -0.00495  -0.00816   0.00214   0.00163  -0.00379
 135        4YZ        -0.01066  -0.01533   0.00365   0.00851  -0.00391
 136 10  C  1S         -0.05125  -0.06004   0.00153   0.00601  -0.00004
 137        2S          0.02616   0.03146   0.01169   0.05390   0.01733
 138        2PX         0.02936   0.05353  -0.00095   0.00988   0.02276
 139        2PY        -0.04239  -0.01366  -0.01953  -0.11105  -0.03164
 140        2PZ         0.00062  -0.00367  -0.00578  -0.03421  -0.02241
 141        3S          1.21848   1.45552  -0.10283  -0.67927  -0.22688
 142        3PX        -0.25023  -0.28636   0.07300   1.24881   0.13519
 143        3PY        -0.83766  -0.94569   0.05597  -0.19132  -0.00984
 144        3PZ        -0.33650  -0.42616   0.03143   0.09606   0.04048
 145        4XX         0.00179   0.00324   0.00269   0.04821   0.02179
 146        4YY        -0.02009  -0.02733   0.00314  -0.03410  -0.02323
 147        4ZZ         0.00358   0.00525  -0.00213  -0.00408   0.00204
 148        4XY        -0.01304  -0.01339   0.00160   0.02934   0.00477
 149        4XZ        -0.00610  -0.00761   0.00156   0.01964   0.00572
 150        4YZ        -0.01632  -0.01910   0.00189  -0.01047  -0.01489
 151 11  H  1S          0.03183  -0.00523   0.03319   0.02614  -0.23883
 152        2S         -0.01994  -0.11951  -0.37662   0.03569  -0.15417
 153        3PX        -0.00159   0.00763   0.01177   0.00288  -0.02398
 154        3PY        -0.00398   0.00031  -0.00162  -0.00162   0.00915
 155        3PZ         0.01221  -0.00807  -0.01214   0.00219  -0.00189
 156 12  H  1S          0.01471  -0.04362  -0.08194  -0.01340   0.04275
 157        2S         -0.37403   0.24396   0.63302  -0.09030   0.14269
 158        3PX        -0.00383   0.00320  -0.00694   0.00320  -0.01880
 159        3PY        -0.00669   0.00270  -0.01155  -0.00011   0.00839
 160        3PZ         0.00428  -0.00412   0.02097  -0.00370   0.00948
 161 13  H  1S          0.00605  -0.05412   0.03389  -0.04864   0.23348
 162        2S         -0.10148  -0.16091  -0.38773  -0.01599   0.10763
 163        3PX        -0.00030   0.00062  -0.00408   0.00220  -0.01365
 164        3PY        -0.00430   0.00532   0.01142  -0.00031   0.01075
 165        3PZ         0.01219  -0.00723  -0.01289   0.00407  -0.01619
 166 14  H  1S         -0.03223   0.03041  -0.02989   0.00825  -0.06937
 167        2S          0.65645  -0.56431  -0.79196   0.05676   0.03526
 168        3PX         0.00059  -0.00109   0.00758  -0.00156   0.00259
 169        3PY         0.00204   0.00031   0.01178  -0.00046   0.00240
 170        3PZ        -0.00385   0.00075  -0.00741  -0.00078   0.00577
 171 15  H  1S         -0.02844   0.02373   0.01073   0.00006  -0.00593
 172        2S         -0.25480   0.19518   0.03424  -0.00160   0.02889
 173        3PX         0.00163  -0.00216  -0.00557   0.00012   0.00191
 174        3PY         0.00276  -0.00298  -0.00789   0.00071  -0.00293
 175        3PZ        -0.00477   0.00407   0.00380  -0.00013  -0.00191
 176 16  H  1S          0.01858   0.02707   0.00146   0.08883   0.06189
 177        2S         -0.27217  -0.32948  -0.02524  -0.74848  -0.15070
 178        3PX        -0.00508  -0.00627   0.00035   0.01234   0.00176
 179        3PY        -0.00616  -0.00556   0.00122   0.02409   0.00105
 180        3PZ        -0.00277  -0.00406   0.00055   0.00977   0.00115
 181 17  H  1S          0.02912   0.01988  -0.00626  -0.03882   0.00962
 182        2S          0.04824  -0.01862   0.01161   0.32107   0.06934
 183        3PX        -0.00300  -0.00268  -0.00001  -0.00297  -0.00084
 184        3PY        -0.00731  -0.01080   0.00110  -0.00978  -0.00326
 185        3PZ        -0.00491  -0.00504   0.00060  -0.01173  -0.00552
 186 18  H  1S          0.01903   0.02617  -0.01126  -0.04868  -0.01549
 187        2S          0.01425   0.03316   0.01338   0.40067   0.08425
 188        3PX        -0.00312  -0.00349  -0.00012  -0.00738  -0.00305
 189        3PY        -0.00936  -0.01070   0.00050  -0.01859  -0.00708
 190        3PZ        -0.00293  -0.00337  -0.00024   0.00004   0.00234
 191 19  H  1S         -0.02933  -0.04283   0.01885   0.04934  -0.03210
 192        2S          0.23764   0.38563   0.02355   0.59408   0.25418
 193        3PX        -0.00137  -0.00159  -0.00046  -0.01304  -0.00377
 194        3PY         0.00412   0.00397  -0.00152  -0.00433  -0.00511
 195        3PZ         0.00155   0.00144  -0.00073  -0.00323  -0.00264
                          61        62        63        64        65
                           V         V         V         V         V
     Eigenvalues --     0.55371   0.55924   0.56292   0.56896   0.59029
   1 1   C  1S          0.00969   0.00106  -0.00113   0.00201   0.01091
   2        2S         -0.20448   0.00188   0.05296  -0.02598  -0.12143
   3        2PX         0.30565   0.04140   0.14413  -0.01684   0.10084
   4        2PY         0.11575   0.05530   0.20114   0.06097   0.17163
   5        2PZ        -0.60630   0.10696   0.25449  -0.04601  -0.06988
   6        3S          0.45521   0.02913   0.05359   0.03240   0.11238
   7        3PX        -0.30039  -0.14722  -0.35085   0.03844  -0.34699
   8        3PY         0.15595  -0.14324  -0.47854  -0.09056  -0.43067
   9        3PZ         1.07524  -0.22297  -0.54486   0.08637  -0.00148
  10        4XX        -0.02806  -0.00476  -0.01322   0.00191  -0.00873
  11        4YY         0.00783   0.00268   0.00780  -0.00375  -0.00024
  12        4ZZ        -0.01290   0.00395   0.01357  -0.00056   0.00189
  13        4XY         0.00499   0.01441   0.04893  -0.00134   0.01715
  14        4XZ        -0.02928   0.00567   0.01861   0.00058   0.01083
  15        4YZ        -0.01066   0.00568   0.01485  -0.00374   0.00797
  16 2   C  1S         -0.01938   0.00170   0.00159  -0.00313  -0.01511
  17        2S         -0.50399  -0.02927  -0.15755   0.00811   0.20131
  18        2PX         0.38297   0.01485   0.25938  -0.07461  -0.22820
  19        2PY         0.13582   0.14210   0.50342   0.00728  -0.05245
  20        2PZ        -0.31108   0.08774   0.37322  -0.05275  -0.08199
  21        3S         -0.17033   0.32356   1.25200  -0.17610  -0.66847
  22        3PX        -0.90408   0.03140  -0.31866   0.07348   0.56017
  23        3PY        -0.94213  -0.13432  -0.64250  -0.00120   0.39385
  24        3PZ        -0.33549   0.13992   0.28271  -0.00008   0.26941
  25        4XX        -0.00026   0.00128   0.01205   0.00198   0.00687
  26        4YY        -0.00475   0.00647   0.03107  -0.00422  -0.01230
  27        4ZZ        -0.12376   0.00277  -0.01306  -0.00850  -0.01126
  28        4XY        -0.02479   0.00950   0.03681  -0.00570  -0.02442
  29        4XZ         0.05283  -0.00241   0.00295   0.00177   0.00455
  30        4YZ         0.06871   0.00004   0.00647   0.00561   0.01303
  31 3   N  1S         -0.02369   0.00647   0.02557  -0.00294   0.00131
  32        2S         -0.00935   0.01554   0.04959   0.00099   0.00170
  33        2PX         0.07125  -0.01974   0.01075  -0.01057  -0.01833
  34        2PY        -0.04398   0.01879   0.03480   0.01288   0.02038
  35        2PZ         0.11361  -0.01507  -0.02425   0.01211   0.02632
  36        3S          0.70195  -0.24292  -0.73563   0.07314  -0.05711
  37        3PX         0.02556   0.02433   0.08730  -0.01002  -0.10926
  38        3PY         0.12738   0.02562   0.12998  -0.01943  -0.10796
  39        3PZ        -0.77754   0.20955   0.70831  -0.10047  -0.05870
  40        4XX        -0.00369   0.00281   0.00705   0.00215   0.00220
  41        4YY         0.01178  -0.00338  -0.01401   0.00221   0.00717
  42        4ZZ        -0.00393   0.01189   0.06169  -0.00189   0.00822
  43        4XY        -0.00246  -0.00785  -0.03047   0.00409   0.01069
  44        4XZ        -0.04691   0.00455   0.00374   0.00089   0.00372
  45        4YZ        -0.04325  -0.00075  -0.00339  -0.00551  -0.01048
  46 4   O  1S          0.01730  -0.00046   0.00183   0.00073  -0.00301
  47        2S         -0.01983  -0.01561  -0.04762  -0.00953  -0.05195
  48        2PX         0.05133   0.00511   0.06753  -0.01873  -0.08108
  49        2PY         0.02856   0.02898   0.11863  -0.01013  -0.07327
  50        2PZ         0.18315   0.05880   0.22837  -0.00092   0.01564
  51        3S         -0.73090  -0.05006  -0.41696   0.04906   0.49991
  52        3PX        -0.15872  -0.00981  -0.08080   0.00304   0.09613
  53        3PY        -0.25685   0.00162  -0.10009   0.01079   0.17322
  54        3PZ        -0.16025  -0.06334  -0.24268   0.01296   0.06176
  55        4XX         0.02395  -0.01127  -0.03153  -0.00165  -0.01766
  56        4YY        -0.02708  -0.01923  -0.08231   0.00579   0.01830
  57        4ZZ        -0.02184  -0.00137   0.00032  -0.00507  -0.01944
  58        4XY        -0.06012  -0.01993  -0.09161   0.00635   0.04253
  59        4XZ        -0.01561  -0.00489  -0.01912  -0.00162  -0.00054
  60        4YZ        -0.03273  -0.00488  -0.02247   0.00146   0.00368
  61 5   O  1S          0.00619   0.00092   0.00442   0.00005  -0.00073
  62        2S         -0.10106  -0.00773  -0.03626  -0.00204   0.03428
  63        2PX        -0.04116  -0.01335  -0.03104  -0.00591  -0.00035
  64        2PY        -0.09006  -0.00021  -0.02439   0.00168   0.03414
  65        2PZ         0.00278   0.00958   0.03243  -0.00205   0.00596
  66        3S          0.12926   0.01817   0.05952   0.00067  -0.04529
  67        3PX         0.00279   0.00370  -0.00760   0.00496   0.01346
  68        3PY         0.02430  -0.00585  -0.01930   0.00034  -0.00651
  69        3PZ         0.01288  -0.02440  -0.08025   0.00967   0.01766
  70        4XX        -0.01950   0.00270   0.00815  -0.00141   0.00371
  71        4YY        -0.01050   0.00193   0.01152  -0.00279  -0.00067
  72        4ZZ        -0.03470  -0.00359  -0.02067   0.00155   0.02739
  73        4XY         0.00509   0.00252   0.00708  -0.00013   0.00064
  74        4XZ        -0.00858  -0.00395  -0.01575   0.00088  -0.00103
  75        4YZ        -0.00935  -0.00670  -0.02262   0.00022  -0.00500
  76 6   O  1S         -0.00030   0.00053   0.00061  -0.00436  -0.00939
  77        2S         -0.05742  -0.02485  -0.07317   0.01974   0.03261
  78        2PX         0.05743   0.03721   0.09104   0.04123   0.03921
  79        2PY         0.00618   0.02315   0.01608   0.00360   0.01272
  80        2PZ        -0.00074  -0.04511   0.00583   0.01336   0.01571
  81        3S          0.09404   0.03053   0.11766   0.01788   0.01994
  82        3PX        -0.04846  -0.02584  -0.06497  -0.00103   0.03948
  83        3PY         0.00243  -0.01571  -0.00611   0.03823   0.00295
  84        3PZ         0.00335   0.01469  -0.00614   0.01343   0.00037
  85        4XX        -0.01788  -0.00741  -0.01987  -0.00119  -0.00826
  86        4YY        -0.02608  -0.01010  -0.02894   0.00405   0.00188
  87        4ZZ        -0.02299  -0.00923  -0.02922  -0.00008  -0.00691
  88        4XY        -0.00160  -0.00496  -0.00776  -0.00295  -0.02975
  89        4XZ        -0.00095   0.00254  -0.00692  -0.00040  -0.01166
  90        4YZ        -0.00204  -0.00288   0.00018   0.00166  -0.00193
  91 7   O  1S          0.00134   0.00012   0.00051  -0.01494  -0.00229
  92        2S          0.02469   0.01310   0.03626  -0.04176   0.06590
  93        2PX        -0.02417   0.00760  -0.08844   0.02442  -0.09497
  94        2PY         0.03579   0.04844   0.08526   0.01697   0.24971
  95        2PZ        -0.00118  -0.06559   0.01274   0.02252   0.06494
  96        3S         -0.09776  -0.03123  -0.01304   0.53290   0.27510
  97        3PX        -0.00201   0.00460   0.09208   0.19087   0.10666
  98        3PY        -0.02010  -0.01305  -0.08288  -0.00564  -0.12396
  99        3PZ        -0.00156  -0.04859   0.01461   0.01996  -0.02065
 100        4XX         0.00590   0.00998   0.03111  -0.02173   0.12352
 101        4YY         0.01187  -0.00486   0.02117  -0.00491   0.00128
 102        4ZZ         0.01242   0.01218   0.01137  -0.04751  -0.01752
 103        4XY         0.00514   0.00914   0.00229  -0.02468  -0.03194
 104        4XZ        -0.00007  -0.02612   0.00886  -0.00343   0.00937
 105        4YZ         0.00288   0.01879   0.00334   0.01667   0.00787
 106 8   C  1S         -0.00089   0.00102  -0.00299   0.02974   0.01795
 107        2S         -0.02243  -0.00745   0.04501   0.33753   0.18569
 108        2PX         0.00270   0.09504  -0.07705  -0.00089  -0.55011
 109        2PY         0.02775   0.22551  -0.07112  -0.40979   0.13295
 110        2PZ        -0.01957  -0.61812   0.15426  -0.14460  -0.04313
 111        3S          0.01300   0.04720  -0.09722   0.49449  -0.54505
 112        3PX        -0.09650  -0.08037   0.08352   0.89956   0.58687
 113        3PY         0.00973  -0.14921   0.09952   0.05545   0.12588
 114        3PZ         0.01144   0.52099  -0.10825   0.13334   0.15989
 115        4XX        -0.00786  -0.00578  -0.02676   0.03619  -0.02952
 116        4YY         0.00004  -0.01228   0.01851   0.10592   0.06860
 117        4ZZ         0.00091   0.01684   0.00037  -0.00690   0.00114
 118        4XY        -0.00272  -0.00861   0.00669   0.04628   0.03142
 119        4XZ        -0.00146   0.01109  -0.00397   0.03002   0.01064
 120        4YZ         0.00036   0.01735   0.00125   0.07019   0.04430
 121 9   N  1S         -0.00229  -0.00038  -0.00244   0.01665  -0.01671
 122        2S          0.00737   0.01177   0.00417   0.07751  -0.00996
 123        2PX         0.00192   0.03619  -0.00078   0.03371  -0.00341
 124        2PY         0.00060   0.08777  -0.01716   0.15605   0.01694
 125        2PZ        -0.00916  -0.19183   0.05636   0.06543   0.01151
 126        3S          0.03693  -0.00182   0.03649  -0.71369   0.24326
 127        3PX         0.00119  -0.02067  -0.01363   0.14179  -0.16319
 128        3PY         0.03247  -0.05614   0.02440  -0.68221   0.28507
 129        3PZ         0.01862   0.08249  -0.02302  -0.24953   0.08109
 130        4XX         0.00032  -0.00516   0.00548   0.01204   0.03398
 131        4YY        -0.00051   0.02120  -0.01022   0.00808  -0.05476
 132        4ZZ         0.00147  -0.00883   0.00209   0.00438  -0.01723
 133        4XY        -0.00080  -0.01036  -0.00650  -0.06301   0.00805
 134        4XZ         0.00053   0.02847  -0.01152  -0.02546   0.01062
 135        4YZ        -0.00312  -0.02475   0.00247  -0.00889  -0.02003
 136 10  C  1S          0.00060  -0.00046  -0.00035  -0.01454  -0.00984
 137        2S         -0.00977   0.00765   0.01005   0.24618   0.09514
 138        2PX        -0.01275   0.05832  -0.05405  -0.02333  -0.48276
 139        2PY         0.01189   0.15059  -0.09182  -0.71536  -0.16246
 140        2PZ        -0.01866  -0.43770   0.09742  -0.27448  -0.12067
 141        3S          0.02529  -0.04274  -0.02982  -0.52963  -0.11771
 142        3PX         0.05419  -0.10204   0.09932  -0.32635   0.89202
 143        3PY        -0.05200  -0.28920   0.12667   1.26347   0.08361
 144        3PZ         0.03066   0.82029  -0.19977   0.43220   0.14162
 145        4XX        -0.00146  -0.01811   0.00871   0.04552  -0.03725
 146        4YY        -0.00087   0.02412  -0.01007   0.00177   0.00322
 147        4ZZ         0.00119  -0.00611   0.00485  -0.00848   0.04868
 148        4XY         0.00260  -0.00648   0.00458  -0.03042   0.01788
 149        4XZ         0.00223   0.04440  -0.01181   0.00340  -0.02031
 150        4YZ        -0.00298  -0.04234   0.00794  -0.00399  -0.01707
 151 11  H  1S         -0.10064  -0.04558  -0.15201   0.03893   0.03356
 152        2S          0.09689  -0.05715  -0.11745   0.02880  -0.05097
 153        3PX         0.00418  -0.00349  -0.01035   0.00357   0.00180
 154        3PY        -0.00123  -0.00502  -0.02350   0.00076  -0.00150
 155        3PZ         0.01623  -0.00636  -0.01185  -0.00042  -0.01559
 156 12  H  1S          0.02405   0.09367   0.29906  -0.00947   0.12711
 157        2S         -0.19504   0.07546   0.22214   0.00330   0.12068
 158        3PX        -0.00577  -0.00163  -0.00349   0.00023  -0.00346
 159        3PY         0.01234  -0.00215  -0.00697  -0.00281  -0.00636
 160        3PZ        -0.02315  -0.00387  -0.02298   0.00078   0.01148
 161 13  H  1S          0.12970  -0.04984  -0.19748  -0.00338   0.00049
 162        2S          0.20590  -0.03853  -0.11579  -0.00809  -0.01519
 163        3PX        -0.01770  -0.00469  -0.01934   0.00324  -0.00349
 164        3PY         0.01635  -0.00759  -0.01998  -0.00123  -0.00493
 165        3PZ         0.01456  -0.00316  -0.00547  -0.00052  -0.00946
 166 14  H  1S          0.21876  -0.04152  -0.14286   0.02969   0.06365
 167        2S         -0.19732  -0.00424  -0.03086  -0.01196  -0.04079
 168        3PX        -0.00670   0.00171   0.00573  -0.00084   0.00086
 169        3PY        -0.01034   0.00197   0.00628  -0.00172  -0.00207
 170        3PZ        -0.01001   0.00196   0.01106  -0.00007   0.00962
 171 15  H  1S          0.01217   0.00163   0.00933  -0.00277  -0.02435
 172        2S         -0.08291  -0.01304  -0.06822   0.00609   0.06889
 173        3PX         0.00411  -0.00160  -0.00408   0.00037  -0.00102
 174        3PY         0.00331  -0.00110  -0.00491   0.00118   0.00095
 175        3PZ         0.00690   0.00188   0.00697  -0.00010  -0.00068
 176 16  H  1S         -0.00712  -0.01772   0.00394   0.16424  -0.33587
 177        2S         -0.03109  -0.01154  -0.03052   0.20551  -0.21205
 178        3PX         0.00142  -0.00420   0.00339  -0.00784   0.01657
 179        3PY         0.00029  -0.01038   0.00171  -0.00548  -0.02271
 180        3PZ         0.00168   0.02622  -0.00725  -0.00218  -0.00676
 181 17  H  1S          0.02123   0.32430  -0.08142  -0.12368   0.11997
 182        2S          0.01758   0.12957  -0.02836  -0.17968   0.01406
 183        3PX         0.00079  -0.00117   0.00142  -0.01744   0.02588
 184        3PY        -0.00071  -0.00321   0.00185   0.01770   0.00083
 185        3PZ        -0.00012   0.02501  -0.00944  -0.00989  -0.00949
 186 18  H  1S         -0.00677  -0.30288   0.08634  -0.14019   0.14727
 187        2S          0.00950  -0.11614   0.04756  -0.19762   0.04392
 188        3PX         0.00021  -0.00633   0.00172  -0.02136   0.02086
 189        3PY        -0.00208  -0.01584   0.00299   0.01089  -0.00817
 190        3PZ         0.00148   0.02116  -0.00376   0.01306   0.01238
 191 19  H  1S         -0.00742  -0.01639  -0.03461  -0.27933   0.04194
 192        2S          0.00300   0.01378   0.04339   0.34829   0.07806
 193        3PX         0.00020  -0.00006   0.00001   0.00775  -0.01054
 194        3PY         0.00208   0.00052   0.00340   0.00007   0.01325
 195        3PZ         0.00097  -0.00145   0.00210   0.00065   0.00430
                          66        67        68        69        70
                           V         V         V         V         V
     Eigenvalues --     0.59749   0.61279   0.62363   0.62883   0.64525
   1 1   C  1S         -0.01528  -0.01604   0.00276  -0.00429   0.00218
   2        2S          0.17521   0.04068   0.00211   0.02164  -0.02377
   3        2PX        -0.29075   0.08776   0.16411  -0.48332  -0.04094
   4        2PY        -0.59979  -0.01825  -0.23492   0.24791  -0.02509
   5        2PZ         0.01847   0.47901  -0.03223   0.04006  -0.00098
   6        3S         -0.35052   1.07991  -0.13905   0.12188   0.12478
   7        3PX         0.76758  -0.60411  -0.47719   1.27266   0.02527
   8        3PY         1.49797  -0.47037   0.72679  -0.68027   0.04173
   9        3PZ         0.25387  -0.80175   0.13092   0.02349   0.07536
  10        4XX         0.01936  -0.03668  -0.01831   0.04337   0.00185
  11        4YY         0.00534  -0.00479   0.02357  -0.04433  -0.00409
  12        4ZZ        -0.02314   0.05526  -0.00543   0.00032   0.00470
  13        4XY        -0.05730   0.03059  -0.02951   0.00948  -0.00747
  14        4XZ        -0.02138  -0.01362  -0.01732   0.01503   0.00419
  15        4YZ        -0.01241  -0.01046   0.00818  -0.02338  -0.00517
  16 2   C  1S          0.02532   0.04170  -0.00158   0.00556  -0.00158
  17        2S         -0.43352  -0.52166  -0.03079  -0.18075  -0.05046
  18        2PX         0.15561  -0.07207  -0.28037   0.37507  -0.09248
  19        2PY         0.21233  -0.01403   0.21848  -0.14254   0.09513
  20        2PZ         0.19011  -0.58474   0.04530  -0.03983  -0.03267
  21        3S          1.35829   0.88376   0.08764   0.38321   0.02562
  22        3PX        -0.69917   0.22830   0.48419  -0.99781   0.05866
  23        3PY        -1.08736   0.04572  -0.57127   0.20506  -0.22502
  24        3PZ        -0.96887   2.47955  -0.35765   0.13610   0.11310
  25        4XX        -0.01596  -0.04518  -0.00553   0.00956   0.00637
  26        4YY         0.01900  -0.02164   0.01204  -0.00667   0.00442
  27        4ZZ         0.01173   0.06057  -0.01127  -0.00818  -0.01593
  28        4XY         0.04490   0.02249   0.00177   0.01655   0.00431
  29        4XZ        -0.01362  -0.02941  -0.00878   0.01013  -0.00617
  30        4YZ        -0.02274  -0.04414   0.00526  -0.01407  -0.00095
  31 3   N  1S         -0.00428  -0.01257  -0.00120  -0.00169   0.00011
  32        2S         -0.01425  -0.06473   0.01163  -0.00746  -0.01822
  33        2PX         0.02268  -0.05679  -0.07610   0.17050   0.00191
  34        2PY         0.00460  -0.01261   0.08603  -0.07269   0.05235
  35        2PZ        -0.00982  -0.08989   0.02902   0.01059   0.04666
  36        3S          0.39215  -1.33460   0.18991  -0.07424  -0.00159
  37        3PX         0.10689   0.13533  -0.05960   0.08228  -0.01159
  38        3PY         0.21221   0.18499   0.03657   0.02175   0.00215
  39        3PZ        -0.03745   0.28638  -0.10416  -0.00895  -0.06780
  40        4XX        -0.00551   0.02694  -0.00561   0.01732   0.00269
  41        4YY        -0.00845   0.02760   0.00965  -0.00699   0.00454
  42        4ZZ        -0.00922  -0.18198   0.01425  -0.01434  -0.00351
  43        4XY        -0.01409  -0.00440  -0.00022   0.00387   0.00472
  44        4XZ         0.00522   0.00438   0.01603  -0.01995   0.00405
  45        4YZ         0.00876   0.00838  -0.01243   0.01143  -0.00743
  46 4   O  1S          0.00604  -0.00271   0.00147   0.00348   0.00128
  47        2S          0.15231  -0.03677   0.01823   0.00041  -0.00759
  48        2PX         0.11824  -0.02464  -0.07494   0.14494  -0.02224
  49        2PY         0.19316  -0.01780   0.09010  -0.04015   0.03106
  50        2PZ        -0.12197   0.01429  -0.03273  -0.00294  -0.01838
  51        3S         -1.10406   0.13039  -0.15530  -0.26913  -0.06958
  52        3PX        -0.27073   0.16435  -0.09190  -0.01556  -0.01687
  53        3PY        -0.38082   0.27826  -0.06271  -0.10908  -0.01974
  54        3PZ        -0.02247  -0.50421   0.04788  -0.10089  -0.04175
  55        4XX         0.04462  -0.01173  -0.00080   0.01173  -0.00306
  56        4YY        -0.00658  -0.01880   0.00953  -0.02522  -0.00366
  57        4ZZ         0.05292  -0.03565   0.00628  -0.00006  -0.00364
  58        4XY        -0.08193  -0.01192  -0.01227  -0.02600  -0.01049
  59        4XZ         0.00342   0.01268   0.00240  -0.00524   0.00133
  60        4YZ         0.00326   0.01602   0.00137   0.00705   0.00852
  61 5   O  1S          0.00037  -0.00339   0.00001   0.00014  -0.00048
  62        2S         -0.05777  -0.19809  -0.00384  -0.06020  -0.03595
  63        2PX        -0.03282  -0.10174  -0.07992   0.08072  -0.03711
  64        2PY        -0.03019  -0.11557   0.05143  -0.11411  -0.00971
  65        2PZ        -0.02408   0.03284  -0.00996  -0.00327  -0.00058
  66        3S          0.05529   0.55317  -0.01949   0.11698   0.07517
  67        3PX        -0.00164   0.12878   0.05169  -0.05937   0.03248
  68        3PY        -0.01268   0.17145  -0.04775   0.08699   0.01643
  69        3PZ        -0.00030  -0.22914   0.02719  -0.02638  -0.01274
  70        4XX        -0.00036  -0.05140   0.00945  -0.02506  -0.00669
  71        4YY        -0.00488  -0.03504  -0.01186   0.00403  -0.00867
  72        4ZZ        -0.05763  -0.06889  -0.00828  -0.02966  -0.01738
  73        4XY        -0.00207   0.03332   0.00021  -0.00076   0.00443
  74        4XZ         0.01154   0.00203   0.00756  -0.00286   0.00486
  75        4YZ         0.01937   0.00101   0.00225   0.00876   0.00459
  76 6   O  1S         -0.00225  -0.00168  -0.00249  -0.00605   0.00239
  77        2S         -0.07094   0.01259  -0.05593   0.07961   0.17889
  78        2PX         0.06295  -0.00215   0.10819  -0.04959   0.18117
  79        2PY         0.02870   0.03069  -0.02133  -0.06668  -0.05063
  80        2PZ        -0.00608  -0.09238  -0.06701   0.06261   0.08339
  81        3S          0.10760  -0.00605   0.20838  -0.01558  -0.40258
  82        3PX        -0.03166   0.00484  -0.01551   0.08300  -0.13107
  83        3PY        -0.01646  -0.01250   0.05079   0.07260  -0.12336
  84        3PZ         0.01134   0.05318   0.06182  -0.00836  -0.11453
  85        4XX        -0.01982   0.00327  -0.01868   0.00971   0.02901
  86        4YY        -0.04328   0.00017   0.00014   0.04477   0.07276
  87        4ZZ        -0.02917   0.00359  -0.03341   0.01604   0.05116
  88        4XY        -0.01292   0.00323  -0.00004  -0.00135  -0.01132
  89        4XZ        -0.00973  -0.01179  -0.00320   0.01288  -0.02071
  90        4YZ        -0.00871   0.00428   0.02458   0.00940   0.01203
  91 7   O  1S         -0.00119  -0.00094  -0.00919  -0.00775  -0.00169
  92        2S          0.04702  -0.01069  -0.10890  -0.09699   0.02368
  93        2PX         0.02987   0.03423  -0.21826  -0.11963  -0.10043
  94        2PY         0.11501   0.02226  -0.02015  -0.08194  -0.02647
  95        2PZ         0.07282  -0.07445  -0.09600   0.08115   0.06898
  96        3S         -0.14842   0.03697   1.14391   0.84738   0.28515
  97        3PX        -0.06886  -0.03027   0.52352   0.29713  -0.03316
  98        3PY        -0.04502   0.00094   0.08983   0.13688  -0.43612
  99        3PZ        -0.05142   0.05553   0.13431   0.00036  -0.11483
 100        4XX         0.01202  -0.00133   0.07862   0.04073   0.06918
 101        4YY         0.01444  -0.01250  -0.05310  -0.04769   0.00890
 102        4ZZ         0.01121  -0.00530  -0.07737  -0.07011  -0.01315
 103        4XY        -0.01081  -0.00073   0.00456  -0.01588   0.00342
 104        4XZ        -0.00096  -0.01087   0.01899   0.02859   0.02951
 105        4YZ         0.00011   0.00584   0.01977  -0.00267   0.02322
 106 8   C  1S          0.01470   0.00314  -0.01333  -0.00090  -0.02891
 107        2S         -0.03146   0.00531   0.30285   0.20574   0.60807
 108        2PX        -0.08005  -0.02215  -0.39612  -0.36407  -0.18634
 109        2PY        -0.01967   0.00721   0.34213   0.21520  -0.43091
 110        2PZ        -0.02859  -0.00231   0.02764   0.03407   0.16386
 111        3S          0.17068   0.00883  -0.99486  -0.61076  -1.13535
 112        3PX        -0.14891   0.02911   1.66664   1.21858   0.31123
 113        3PY         0.21752  -0.03866  -1.45424  -0.87688   1.79318
 114        3PZ         0.06620   0.01953  -0.22406  -0.21531  -0.01961
 115        4XX         0.00785   0.00704  -0.05543  -0.01756  -0.01064
 116        4YY         0.02692   0.00426   0.02439   0.02502   0.00367
 117        4ZZ        -0.00944  -0.00157   0.02163   0.00819   0.03580
 118        4XY         0.01875   0.00020  -0.00919   0.00631  -0.04770
 119        4XZ         0.00928   0.00703  -0.01284  -0.00802  -0.01786
 120        4YZ         0.02446   0.00230  -0.00016   0.01217  -0.03433
 121 9   N  1S         -0.00531  -0.00007  -0.00262  -0.00209   0.00611
 122        2S          0.00406  -0.00183   0.00211  -0.01520   0.05303
 123        2PX         0.00005  -0.00534  -0.03310  -0.02985  -0.04641
 124        2PY         0.00243   0.00140   0.01247   0.01955   0.02054
 125        2PZ        -0.00172  -0.00022  -0.03103  -0.01294   0.12262
 126        3S          0.15252  -0.01991  -0.86903  -0.55153   0.79233
 127        3PX         0.00416   0.00812  -0.06307  -0.04699  -0.31963
 128        3PY         0.07438   0.00451  -0.12017  -0.06022  -0.01903
 129        3PZ         0.03392  -0.00790  -0.05826  -0.00167   0.01480
 130        4XX         0.00906   0.00167   0.01569   0.01445  -0.00916
 131        4YY        -0.01583  -0.00323  -0.04110  -0.04123   0.06648
 132        4ZZ        -0.00438  -0.00206   0.00064  -0.00319   0.00742
 133        4XY        -0.00525   0.00312   0.02213   0.01865  -0.03468
 134        4XZ         0.00031  -0.00133   0.00922   0.01496  -0.00808
 135        4YZ        -0.00785  -0.00109  -0.02231  -0.01506   0.05672
 136 10  C  1S         -0.00816  -0.00135   0.01056   0.00201   0.01980
 137        2S          0.08607   0.01209  -0.13825  -0.04511  -0.06648
 138        2PX        -0.29837  -0.03385   0.48028   0.23278   0.07199
 139        2PY        -0.11022  -0.03473  -0.10254  -0.06603   0.47528
 140        2PZ        -0.10948   0.04217   0.10003  -0.08075  -0.14904
 141        3S         -0.11775   0.00411   0.56957   0.30814  -0.84283
 142        3PX         0.64394   0.05116  -1.58515  -0.88407   0.20316
 143        3PY         0.06159   0.06342   0.37258   0.21474  -0.85413
 144        3PZ         0.16413  -0.09550  -0.25263   0.14895   0.64886
 145        4XX        -0.02139  -0.00110   0.02971   0.00388  -0.00104
 146        4YY         0.00202   0.00164   0.02503   0.02163  -0.03559
 147        4ZZ         0.02775   0.00084  -0.04828  -0.01876   0.02599
 148        4XY         0.00843   0.00145  -0.01734  -0.01363  -0.01042
 149        4XZ        -0.00899  -0.00564   0.01044   0.01081   0.02087
 150        4YZ        -0.01025   0.00165   0.03183   0.01565  -0.04646
 151 11  H  1S          0.00643  -0.22082  -0.05848   0.18652   0.05468
 152        2S          0.07567  -0.27930  -0.17052   0.39133  -0.02473
 153        3PX        -0.00270   0.00601  -0.00575   0.01464   0.00146
 154        3PY         0.01619   0.00499   0.02588  -0.03095   0.00349
 155        3PZ         0.03292  -0.03777  -0.00605   0.02641  -0.00353
 156 12  H  1S         -0.29702  -0.05706  -0.06226  -0.05516  -0.01805
 157        2S         -0.44878   0.28686  -0.06405  -0.05986  -0.00968
 158        3PX         0.01784  -0.02125  -0.01247   0.02870   0.00373
 159        3PY         0.03627  -0.02068   0.01721  -0.01589   0.00196
 160        3PZ        -0.01305   0.01254  -0.00044  -0.00600   0.00214
 161 13  H  1S          0.10906  -0.13707   0.18072  -0.20920   0.00506
 162        2S          0.17437  -0.18076   0.22055  -0.35131   0.01115
 163        3PX         0.00540  -0.00791  -0.01333   0.03496   0.00197
 164        3PY         0.00480   0.00953  -0.00547  -0.00056  -0.00361
 165        3PZ         0.03974  -0.03439   0.02129  -0.02033   0.00314
 166 14  H  1S         -0.10631   0.01298   0.00553  -0.00393   0.02364
 167        2S          0.07923  -0.22969   0.01643  -0.04671  -0.05639
 168        3PX         0.00023  -0.01399   0.00434  -0.01055  -0.00271
 169        3PY        -0.00160  -0.01960  -0.00485  -0.00237  -0.00729
 170        3PZ        -0.01616  -0.06356   0.00183  -0.00953  -0.00328
 171 15  H  1S          0.05603   0.12637   0.00133   0.03484   0.02567
 172        2S         -0.13823  -0.19417  -0.01001  -0.07282  -0.04144
 173        3PX        -0.00016  -0.00241  -0.00297   0.00674  -0.00028
 174        3PY         0.00076  -0.00198   0.00516  -0.00325   0.00166
 175        3PZ        -0.00140   0.00991  -0.00085   0.00128   0.00052
 176 16  H  1S         -0.17725  -0.02119   0.21060   0.04282   0.09737
 177        2S         -0.15397   0.00262   0.49824   0.30076  -0.17590
 178        3PX         0.01235   0.00054  -0.03385  -0.02194   0.01297
 179        3PY        -0.00426  -0.00039  -0.02317  -0.02189  -0.00416
 180        3PZ         0.00117  -0.00284  -0.01687  -0.00727   0.02209
 181 17  H  1S          0.05004  -0.01620  -0.07072   0.00142   0.27140
 182        2S          0.02269  -0.03658  -0.20906  -0.07240   0.41939
 183        3PX         0.01042   0.00256  -0.00843  -0.00363  -0.01106
 184        3PY        -0.00599   0.00338   0.04067   0.01811  -0.03976
 185        3PZ        -0.00596  -0.00185   0.01623   0.01482  -0.00716
 186 18  H  1S          0.04823   0.01857  -0.04896  -0.04832   0.04472
 187        2S          0.01926   0.02234  -0.19400  -0.21070  -0.00041
 188        3PX         0.00838   0.00095  -0.00862   0.00048   0.00688
 189        3PY        -0.00936  -0.00048   0.04213   0.02872  -0.01423
 190        3PZ         0.00569  -0.00357   0.00457   0.01289   0.02216
 191 19  H  1S         -0.02744   0.00754   0.08389   0.08888  -0.08065
 192        2S          0.03700  -0.00275  -0.10604  -0.06182   0.34327
 193        3PX        -0.00338  -0.00058  -0.00222  -0.00393   0.03118
 194        3PY         0.00931   0.00001   0.00514   0.00479  -0.03857
 195        3PZ         0.00338   0.00166   0.00306  -0.00131  -0.01909
                          71        72        73        74        75
                           V         V         V         V         V
     Eigenvalues --     0.64909   0.69953   0.72362   0.73366   0.75155
   1 1   C  1S          0.00381  -0.00634  -0.00024  -0.01379   0.00212
   2        2S         -0.04264   0.04891  -0.01163   0.04769  -0.05181
   3        2PX        -0.14117   0.04452  -0.00717  -0.00770  -0.24125
   4        2PY         0.04833   0.04416   0.01237   0.04129   0.18093
   5        2PZ        -0.01733  -0.15116   0.01389   0.19095  -0.03088
   6        3S          0.01343  -0.14463   0.00348  -0.14342   0.01069
   7        3PX         0.34266   0.12495   0.02003  -0.03907   0.59601
   8        3PY        -0.06293   0.18977  -0.01015  -0.14305  -0.22671
   9        3PZ         0.09404   0.18613  -0.03046  -0.50990   0.12576
  10        4XX         0.01248   0.00070  -0.00006  -0.01279   0.00527
  11        4YY        -0.01040   0.01750  -0.00096  -0.03554   0.00508
  12        4ZZ        -0.00565  -0.04408  -0.00049   0.03715  -0.01967
  13        4XY        -0.00797   0.01653  -0.00324  -0.03298  -0.00034
  14        4XZ         0.00095  -0.02135  -0.00422   0.00827  -0.08102
  15        4YZ        -0.00188  -0.01941   0.00490   0.02345   0.04915
  16 2   C  1S         -0.00290   0.04178  -0.00135  -0.00193  -0.00093
  17        2S         -0.01999  -0.25836   0.00558  -0.06626  -0.03329
  18        2PX         0.03498   0.03537   0.01309  -0.05516   0.19465
  19        2PY         0.00963  -0.03607  -0.00792  -0.09203  -0.06146
  20        2PZ         0.01798  -0.18353   0.02065   0.13371   0.02811
  21        3S         -0.00291   0.81449  -0.03896   0.19520   0.05975
  22        3PX        -0.19598  -0.16502  -0.03866   0.12938  -0.61562
  23        3PY        -0.06321  -0.12429   0.03061   0.24850   0.11535
  24        3PZ        -0.18037   0.10606  -0.08062  -0.22524  -0.25841
  25        4XX         0.00667  -0.05611   0.00115   0.01898  -0.03045
  26        4YY         0.00334  -0.06585   0.00576   0.05503   0.02797
  27        4ZZ        -0.01471   0.15789  -0.00793  -0.07165   0.00105
  28        4XY         0.00214  -0.01530  -0.00088   0.04810  -0.01897
  29        4XZ         0.00265   0.03444  -0.00315  -0.01715  -0.00066
  30        4YZ         0.00146   0.03933  -0.00003  -0.02166   0.01585
  31 3   N  1S         -0.00094  -0.01143  -0.00020   0.00688  -0.00281
  32        2S          0.00203   0.03446  -0.00192   0.06225   0.00870
  33        2PX         0.01812  -0.36251  -0.04984  -0.02763  -0.62357
  34        2PY         0.02413  -0.55371   0.05530   0.07132   0.43496
  35        2PZ         0.03020  -0.49935   0.02121   0.24625  -0.02378
  36        3S          0.13452  -0.39331   0.06421  -0.06716   0.16463
  37        3PX         0.01829   0.43145   0.06130   0.05084   0.81113
  38        3PY        -0.02763   0.62912  -0.07094  -0.05842  -0.54492
  39        3PZ        -0.08982   0.57228  -0.04632  -0.32307  -0.02510
  40        4XX         0.00297  -0.00490  -0.00099   0.01849   0.00113
  41        4YY        -0.00165  -0.04099  -0.00103   0.02945  -0.01144
  42        4ZZ         0.01094  -0.13556   0.00694   0.04786   0.00746
  43        4XY         0.00318  -0.05456   0.00114   0.01939  -0.00482
  44        4XZ        -0.00256   0.00821   0.00117   0.00678   0.00745
  45        4YZ        -0.00205   0.02260  -0.00069   0.00689  -0.00892
  46 4   O  1S          0.00176   0.00006   0.00006  -0.00064   0.00403
  47        2S         -0.00004   0.04413  -0.01202  -0.32496   0.01492
  48        2PX         0.02122   0.04793   0.00535   0.15166   0.11436
  49        2PY         0.00810   0.04166   0.00059   0.19487  -0.08123
  50        2PZ        -0.01087   0.14596   0.00339   0.05513   0.04031
  51        3S         -0.09856  -0.16730   0.01763   0.66407  -0.21932
  52        3PX        -0.03157  -0.05728  -0.00512  -0.22003  -0.10769
  53        3PY        -0.06254  -0.08551  -0.00873  -0.29976   0.01444
  54        3PZ         0.01462   0.01002   0.00699   0.05615  -0.04076
  55        4XX         0.00308   0.02193  -0.00282  -0.09219   0.01828
  56        4YY        -0.00385   0.02837  -0.00521  -0.09072  -0.01077
  57        4ZZ         0.00101  -0.01696  -0.00215  -0.09712   0.00497
  58        4XY        -0.00780   0.00909  -0.00085   0.00178  -0.01195
  59        4XZ        -0.00171  -0.04858   0.00278  -0.00781   0.02501
  60        4YZ         0.00232  -0.07035  -0.00050  -0.01523  -0.02097
  61 5   O  1S          0.00017   0.00129  -0.00023  -0.01702   0.00216
  62        2S         -0.00988   0.14083  -0.00177  -0.02071  -0.00415
  63        2PX         0.00653   0.05666  -0.01277  -0.15559  -0.07751
  64        2PY        -0.01551   0.06051   0.00304  -0.18289   0.07583
  65        2PZ        -0.00741  -0.05152  -0.00616  -0.40178   0.05664
  66        3S          0.00109  -0.36994  -0.00222  -0.23167   0.02961
  67        3PX        -0.00958  -0.12829   0.01292   0.08795   0.10480
  68        3PY         0.00497  -0.16836  -0.00361   0.07561  -0.08210
  69        3PZ         0.01708   0.08077   0.01116   0.54774  -0.07137
  70        4XX        -0.00323   0.03683   0.00013  -0.03230   0.01566
  71        4YY        -0.00133   0.00268  -0.00309  -0.12950   0.00106
  72        4ZZ        -0.00739   0.05769  -0.00157  -0.06192   0.00483
  73        4XY        -0.00244  -0.06219  -0.00124  -0.15769   0.02011
  74        4XZ         0.00138  -0.04107   0.00000  -0.06231   0.01017
  75        4YZ         0.00325  -0.05686  -0.00109  -0.08281   0.00147
  76 6   O  1S          0.00093   0.00022   0.00728  -0.00059  -0.00659
  77        2S          0.12601  -0.03985   0.11662   0.05140   0.22740
  78        2PX         0.11806   0.08345   0.06306  -0.03150  -0.13934
  79        2PY         0.01979  -0.01465  -0.07379   0.01908  -0.06490
  80        2PZ        -0.09190   0.01915  -0.02333  -0.04010  -0.11425
  81        3S         -0.26943   0.03729  -0.22919  -0.07297  -0.27099
  82        3PX        -0.08204  -0.05008  -0.07229   0.02359   0.19174
  83        3PY        -0.09860  -0.02916   0.06246  -0.00966   0.10745
  84        3PZ         0.01668  -0.03011   0.01468   0.03183   0.11564
  85        4XX         0.01542  -0.01773   0.02625   0.01939   0.07073
  86        4YY         0.05530  -0.01416   0.06611   0.01604   0.08039
  87        4ZZ         0.03889  -0.01545   0.05360   0.01387   0.06323
  88        4XY        -0.01265  -0.00831   0.02625   0.00398   0.01363
  89        4XZ         0.01190  -0.00363   0.00513  -0.00164  -0.00078
  90        4YZ         0.00087  -0.00220   0.01222   0.00358   0.01211
  91 7   O  1S         -0.00084  -0.00342   0.00712   0.00018  -0.00089
  92        2S          0.00011  -0.06162   0.08010   0.00233  -0.06639
  93        2PX        -0.02191   0.04434   0.02197   0.00247   0.07072
  94        2PY         0.03153  -0.02543  -0.14599  -0.00171  -0.07535
  95        2PZ        -0.12648  -0.01490  -0.06762  -0.01318  -0.08865
  96        3S          0.13927   0.27873  -0.45948  -0.02710   0.11903
  97        3PX        -0.02677  -0.04067  -0.14607  -0.01645  -0.09709
  98        3PY        -0.19237  -0.02672   0.13418   0.01192   0.13420
  99        3PZ        -0.20172   0.00180   0.04702   0.01370   0.12179
 100        4XX         0.03372  -0.00630   0.01064  -0.00323  -0.03128
 101        4YY         0.00633  -0.02564   0.00728   0.00176  -0.04230
 102        4ZZ        -0.02327  -0.03358   0.04289   0.00073  -0.03151
 103        4XY         0.00825  -0.00150   0.05439  -0.00326  -0.03311
 104        4XZ        -0.00094   0.00427   0.01570  -0.00421  -0.01813
 105        4YZ         0.00507   0.00632  -0.00588   0.00185  -0.00375
 106 8   C  1S         -0.01642   0.00239   0.04822  -0.00136  -0.00164
 107        2S          0.38905   0.15473  -0.40127  -0.03103   0.02080
 108        2PX         0.01290  -0.07810  -0.11002   0.00109  -0.09052
 109        2PY        -0.01650  -0.00192   0.21385  -0.02222  -0.09209
 110        2PZ        -0.59031  -0.00801   0.07495   0.00820  -0.01720
 111        3S         -0.72444  -0.27261   1.28782   0.05969   0.05860
 112        3PX        -0.15713   0.21918  -0.22454  -0.02513   0.17811
 113        3PY         0.59579   0.01983  -0.27335   0.05412   0.17926
 114        3PZ         1.47970   0.02639  -0.15481  -0.01740   0.02437
 115        4XX         0.00716   0.01906  -0.05186   0.00121   0.03656
 116        4YY        -0.00381   0.00921   0.13195  -0.00609  -0.01874
 117        4ZZ         0.02304   0.00261  -0.03651  -0.00096  -0.00223
 118        4XY        -0.01808  -0.00900  -0.10534   0.00643   0.01718
 119        4XZ        -0.03348   0.00165  -0.03923   0.00372   0.02265
 120        4YZ        -0.00730   0.00400   0.07272  -0.00381  -0.00652
 121 9   N  1S          0.00472   0.00044  -0.01066   0.00052   0.00550
 122        2S          0.01749   0.02063  -0.07352  -0.00818  -0.03894
 123        2PX        -0.01509  -0.05168  -0.75038   0.03704   0.08948
 124        2PY         0.09489   0.00528   0.43873  -0.01409  -0.04747
 125        2PZ        -0.14762   0.00373   0.09924   0.00218   0.07082
 126        3S          0.57727  -0.03245  -0.32406   0.03278   0.07804
 127        3PX        -0.14309   0.00509   0.94074  -0.03899  -0.12246
 128        3PY         0.06603  -0.02105  -0.53748   0.02462   0.06146
 129        3PZ        -0.11246  -0.01238  -0.10871   0.00835  -0.05876
 130        4XX        -0.00873  -0.00045  -0.07818   0.00269   0.01114
 131        4YY         0.07044   0.00419  -0.16307   0.00256   0.01185
 132        4ZZ        -0.03249  -0.00114  -0.01783  -0.00002  -0.01022
 133        4XY        -0.01495  -0.00120   0.02279   0.00143   0.01391
 134        4XZ        -0.01174  -0.00011  -0.00620   0.00079   0.00886
 135        4YZ         0.00269   0.00268  -0.07647   0.00330   0.01858
 136 10  C  1S          0.01148   0.00241  -0.01254  -0.00223  -0.00676
 137        2S         -0.03629  -0.00224   0.11236   0.01141   0.03505
 138        2PX        -0.08930   0.02593  -0.00245  -0.01775  -0.02859
 139        2PY         0.03880   0.01275   0.09021   0.00235  -0.02403
 140        2PZ         0.55572   0.02198   0.03789  -0.02011  -0.00493
 141        3S         -0.50601  -0.04476  -0.17639  -0.02338  -0.13191
 142        3PX         0.51272  -0.09261   0.36187   0.04641   0.05841
 143        3PY         0.15482  -0.01294  -0.10284   0.00051   0.10747
 144        3PZ        -1.42052  -0.02636   0.02500   0.05188   0.08813
 145        4XX         0.02452  -0.00433   0.02606  -0.00194  -0.01229
 146        4YY        -0.03826   0.00703  -0.04107  -0.00162   0.00788
 147        4ZZ         0.00807   0.00034  -0.00480   0.00192  -0.00218
 148        4XY         0.01187  -0.00261   0.04360  -0.00043  -0.00840
 149        4XZ        -0.05322  -0.00083   0.02080  -0.00021  -0.00014
 150        4YZ         0.00211  -0.00226  -0.01479   0.00074  -0.00900
 151 11  H  1S          0.07321  -0.11641  -0.01758  -0.02924  -0.28676
 152        2S          0.10166   0.19387   0.00824  -0.17722   0.61933
 153        3PX         0.00182   0.01155  -0.00128   0.00099   0.00565
 154        3PY        -0.00359   0.00653  -0.00046  -0.00313  -0.01240
 155        3PZ         0.00946   0.01491   0.00304  -0.00547   0.05149
 156 12  H  1S         -0.01254  -0.08419  -0.00479  -0.15399  -0.00202
 157        2S         -0.05672  -0.18852   0.00776   0.33181  -0.11782
 158        3PX         0.00868  -0.00597  -0.00156  -0.01442  -0.00916
 159        3PY         0.00124  -0.00311   0.00009  -0.01983   0.01330
 160        3PZ        -0.00022  -0.01156  -0.00025   0.01122  -0.00866
 161 13  H  1S          0.01518  -0.07957   0.02864   0.01575   0.31393
 162        2S         -0.08524   0.16798  -0.05427  -0.27522  -0.52502
 163        3PX         0.01172   0.00233   0.00165   0.00011   0.02001
 164        3PY        -0.00520   0.01355  -0.00164  -0.00048  -0.00519
 165        3PZ        -0.00311   0.01269  -0.00259  -0.01351  -0.03719
 166 14  H  1S          0.01017  -0.19657   0.00615   0.10688  -0.02197
 167        2S         -0.00730   0.42932  -0.00267  -0.05857   0.02950
 168        3PX        -0.00247   0.03472  -0.00074   0.00504  -0.00337
 169        3PY        -0.00116   0.05316  -0.00004   0.00821   0.00263
 170        3PZ         0.00183  -0.04291   0.00212   0.00391   0.00314
 171 15  H  1S          0.00104  -0.30551  -0.00767  -0.71401   0.07084
 172        2S         -0.01027   0.31413   0.01006   0.83521  -0.09691
 173        3PX         0.00190   0.01446   0.00111   0.09214  -0.01231
 174        3PY         0.00129   0.01927   0.00224   0.13005  -0.00990
 175        3PZ        -0.00030   0.01102   0.00056   0.05005  -0.00641
 176 16  H  1S          0.06007  -0.00791  -0.11749  -0.01473  -0.06926
 177        2S         -0.12075   0.06250  -0.25574  -0.01249   0.04043
 178        3PX         0.01619  -0.00275  -0.01007   0.00039  -0.00471
 179        3PY         0.01287  -0.00494   0.01002   0.00086  -0.00387
 180        3PZ        -0.02893  -0.00084   0.00173   0.00074   0.00287
 181 17  H  1S         -0.10217   0.04013  -0.11387  -0.01531   0.01458
 182        2S         -0.25671  -0.02635   0.18838   0.02527  -0.05198
 183        3PX         0.02412   0.00113   0.01510  -0.00014  -0.00149
 184        3PY         0.02397   0.00474  -0.01658  -0.00365  -0.00028
 185        3PZ        -0.02104   0.00006   0.00429   0.00083   0.00249
 186 18  H  1S          0.28045   0.01200  -0.15144  -0.00645  -0.06375
 187        2S          0.50907   0.00346   0.25029  -0.01714  -0.00099
 188        3PX        -0.01307   0.00220   0.01792   0.00074   0.00358
 189        3PY        -0.03099   0.00195  -0.01482  -0.00038  -0.00250
 190        3PZ        -0.03784   0.00104  -0.00952   0.00000  -0.00474
 191 19  H  1S         -0.05211  -0.00435  -0.14418   0.01533   0.11037
 192        2S          0.23318   0.04767   0.22826  -0.01725  -0.07370
 193        3PX         0.01943   0.00807   0.03033  -0.00302  -0.00854
 194        3PY        -0.02958  -0.00215   0.05455  -0.00294  -0.01851
 195        3PZ         0.00489   0.00030   0.02687  -0.00143  -0.00755
                          76        77        78        79        80
                           V         V         V         V         V
     Eigenvalues --     0.77808   0.78494   0.81040   0.81885   0.83509
   1 1   C  1S          0.05728   0.00353   0.00801  -0.01448   0.00129
   2        2S         -0.24474   0.02010  -0.01367   0.02296   0.17881
   3        2PX         0.01548   0.02992   0.07622   0.01001   0.27462
   4        2PY         0.10571   0.05566   0.07133   0.03486  -0.25479
   5        2PZ         0.00482  -0.00485   0.04501  -0.00893  -0.09176
   6        3S          1.33834   0.09041   0.33137  -0.44360   0.00785
   7        3PX        -0.29569  -0.08684  -0.15641  -0.01078  -0.48344
   8        3PY        -0.59985  -0.14123  -0.02175   0.09100   0.15807
   9        3PZ         0.80294   0.12405   0.26802  -0.30088   0.37264
  10        4XX         0.03049   0.00180   0.01331  -0.02699   0.03973
  11        4YY         0.00738   0.00018  -0.00338   0.01259  -0.03593
  12        4ZZ         0.04930   0.01025   0.00539  -0.01676   0.03432
  13        4XY        -0.02358  -0.00761  -0.06050   0.01222   0.04550
  14        4XZ        -0.00937  -0.01295  -0.00759  -0.00960   0.08219
  15        4YZ        -0.04532  -0.00564  -0.04133   0.02723  -0.07731
  16 2   C  1S          0.00920   0.00347   0.02050  -0.01868   0.00856
  17        2S          0.46941   0.07594   0.28540  -0.31270   0.27045
  18        2PX         0.19402   0.02630  -0.10605  -0.04474   0.23241
  19        2PY         0.41622   0.04609   0.09422   0.01611  -0.09067
  20        2PZ        -0.44422  -0.05890  -0.06242   0.11565  -0.08365
  21        3S         -1.20772  -0.20209  -0.37502   0.34840  -0.60632
  22        3PX        -0.69551  -0.11125  -0.10977   0.36117  -0.55877
  23        3PY        -1.14492  -0.14108  -0.63521   0.22133   0.17936
  24        3PZ         1.43543   0.20918   0.23019  -0.60674   0.57955
  25        4XX         0.02622  -0.00001   0.02680  -0.01783   0.01525
  26        4YY         0.00775   0.00689   0.05875  -0.05138   0.00850
  27        4ZZ         0.06083   0.01132   0.03329  -0.04330   0.02788
  28        4XY        -0.01072  -0.00061   0.07190  -0.06221   0.02468
  29        4XZ         0.01316   0.00181   0.00953   0.00116  -0.05313
  30        4YZ         0.03019   0.00347   0.01466  -0.02468   0.02139
  31 3   N  1S         -0.00868  -0.00109   0.00744  -0.01029   0.00512
  32        2S          0.07952   0.01148  -0.08751   0.09908  -0.04623
  33        2PX        -0.06440  -0.07034   0.08850   0.13118  -0.28753
  34        2PY        -0.07008   0.02174  -0.10954  -0.08782   0.21846
  35        2PZ        -0.05662  -0.02351  -0.19112   0.17057   0.00099
  36        3S         -0.48291  -0.07146   0.17479   0.04299  -0.09340
  37        3PX         0.21960   0.10219  -0.05348  -0.27883   0.52804
  38        3PY         0.30561   0.00403   0.31512   0.01609  -0.29827
  39        3PZ         0.15941   0.03911   0.19353  -0.30844   0.09223
  40        4XX         0.02364   0.00104  -0.03431   0.02534  -0.01629
  41        4YY        -0.00389   0.00065   0.00000  -0.00261   0.00969
  42        4ZZ        -0.03652  -0.00573  -0.01938   0.02938  -0.01175
  43        4XY        -0.03757  -0.00521   0.04182  -0.04094   0.01536
  44        4XZ         0.02031   0.00449  -0.02325   0.01766   0.02287
  45        4YZ         0.02186   0.00241  -0.03594   0.04417  -0.01906
  46 4   O  1S          0.00312   0.00088   0.01125  -0.00694  -0.00304
  47        2S          0.16246   0.01039  -0.18184   0.11115  -0.00499
  48        2PX        -0.03041  -0.01011   0.03634  -0.09396  -0.01239
  49        2PY         0.02680   0.00499   0.18278  -0.12214   0.02764
  50        2PZ        -0.22808  -0.00849   0.25996  -0.16164  -0.03558
  51        3S         -0.35635  -0.03711  -0.17753   0.09885   0.09569
  52        3PX        -0.02915   0.00044  -0.10911   0.07087   0.12642
  53        3PY        -0.08857  -0.00767  -0.19618   0.11090   0.00276
  54        3PZ         0.19071  -0.00285  -0.54145   0.45080  -0.07008
  55        4XX         0.06266   0.00480  -0.05320   0.02964  -0.00415
  56        4YY         0.07095   0.00443  -0.06904   0.04252  -0.00724
  57        4ZZ         0.05564   0.00352  -0.10898   0.08935  -0.01073
  58        4XY         0.00481   0.00025  -0.02874   0.00971   0.01018
  59        4XZ        -0.04230  -0.00158   0.03104  -0.03614   0.01094
  60        4YZ        -0.05125  -0.00721   0.06512  -0.05385   0.01585
  61 5   O  1S          0.00820   0.00121  -0.00986   0.01045  -0.00335
  62        2S         -0.18860  -0.01886   0.13531  -0.15071  -0.00624
  63        2PX        -0.01777  -0.03051  -0.12606   0.14028  -0.15521
  64        2PY         0.03948   0.02747  -0.13174   0.13023   0.03121
  65        2PZ        -0.23505  -0.00902   0.32998  -0.25674  -0.00095
  66        3S          0.11253   0.01742  -0.06955   0.12928   0.02860
  67        3PX        -0.15949   0.01435   0.26470  -0.27386   0.18205
  68        3PY        -0.28830  -0.05173   0.35423  -0.32010  -0.00303
  69        3PZ         0.27499   0.00733  -0.42855   0.34862  -0.02407
  70        4XX        -0.03751  -0.00170   0.03463  -0.03876  -0.00421
  71        4YY        -0.06208  -0.00541   0.03202  -0.02527  -0.00818
  72        4ZZ        -0.08745  -0.00665   0.05491  -0.05070  -0.01148
  73        4XY        -0.03573  -0.00039  -0.00543   0.01865  -0.00886
  74        4XZ         0.00114   0.00187   0.00440  -0.00031   0.00325
  75        4YZ         0.00318   0.00040   0.00526   0.00372  -0.00372
  76 6   O  1S         -0.00157   0.00034  -0.00426  -0.00605   0.00791
  77        2S          0.11911   0.04817   0.23672   0.02431  -0.20390
  78        2PX        -0.09936  -0.01049  -0.06165   0.11174   0.04493
  79        2PY         0.00620   0.01878  -0.07403  -0.05832   0.22622
  80        2PZ        -0.04328  -0.06030  -0.02153  -0.02445   0.28822
  81        3S         -0.11146  -0.07808  -0.25877   0.02225   0.10977
  82        3PX         0.09113   0.00602   0.15155  -0.00265  -0.15578
  83        3PY         0.07215  -0.02521   0.11922   0.02814  -0.40461
  84        3PZ         0.06191   0.07779   0.05642   0.02774  -0.34988
  85        4XX         0.04429   0.01307   0.08375   0.00057  -0.10822
  86        4YY         0.04311   0.01831   0.08775   0.01275  -0.06711
  87        4ZZ         0.03723   0.01704   0.06358  -0.00744  -0.04292
  88        4XY         0.02045   0.00089   0.02102   0.00044  -0.00626
  89        4XZ         0.00319   0.00706   0.01251   0.00127   0.00322
  90        4YZ         0.00867  -0.00002   0.01924   0.01223  -0.01788
  91 7   O  1S          0.00227   0.00079  -0.00238  -0.00456  -0.00668
  92        2S          0.11913   0.02206  -0.01597  -0.17744  -0.12512
  93        2PX        -0.11840  -0.02933  -0.08024   0.04718  -0.02991
  94        2PY         0.05757  -0.04824  -0.08608  -0.13968   0.01529
  95        2PZ        -0.02914   0.12620  -0.01886  -0.04791   0.04349
  96        3S         -0.27778  -0.07897   0.09885   0.43582   0.43742
  97        3PX         0.18418  -0.00481   0.16831  -0.02955  -0.09353
  98        3PY         0.00310   0.00544   0.04302  -0.03609  -0.32522
  99        3PZ         0.05583  -0.05396  -0.00336  -0.02598  -0.16928
 100        4XX         0.03381   0.00061  -0.01179  -0.05879  -0.03400
 101        4YY         0.03803   0.02331   0.00205  -0.04724  -0.00426
 102        4ZZ         0.05013  -0.00365  -0.00698  -0.06183  -0.03438
 103        4XY         0.00198  -0.00033  -0.02502  -0.02688   0.04364
 104        4XZ        -0.00473   0.01409  -0.01007  -0.01162   0.02278
 105        4YZ        -0.00050  -0.02380  -0.00202   0.00279   0.02405
 106 8   C  1S         -0.00655   0.00010  -0.01669  -0.01629  -0.00816
 107        2S         -0.15880  -0.07455  -0.45797  -0.45332  -0.01640
 108        2PX         0.03486  -0.04649  -0.18308  -0.28781  -0.07587
 109        2PY        -0.01061  -0.09913  -0.27896  -0.39453  -0.13044
 110        2PZ        -0.01233   0.20820  -0.17305  -0.20239  -0.09907
 111        3S          0.27434   0.19459   0.95481   0.95286  -0.27096
 112        3PX        -0.01163   0.08382   0.64116   0.82798   0.05494
 113        3PY        -0.00589   0.38147   0.87024   1.36310   0.78097
 114        3PZ         0.04059  -0.57415   0.53503   0.67422   0.39745
 115        4XX        -0.04717   0.00334  -0.05386  -0.02148  -0.02317
 116        4YY        -0.00083  -0.00494  -0.04638  -0.06804  -0.02824
 117        4ZZ         0.00352  -0.00927  -0.00800  -0.01392   0.01294
 118        4XY         0.00303   0.01360   0.03376   0.04404   0.03865
 119        4XZ        -0.00155  -0.04676   0.00424   0.01582   0.00981
 120        4YZ        -0.00511   0.00678  -0.01972  -0.02500   0.00042
 121 9   N  1S          0.00060  -0.00138   0.00405   0.00262  -0.00704
 122        2S         -0.05299   0.00089  -0.09089  -0.01355   0.10430
 123        2PX         0.04694   0.11190   0.10392   0.03256  -0.15142
 124        2PY        -0.00903   0.33506  -0.07081  -0.15937  -0.21390
 125        2PZ         0.10294  -0.76450   0.04076  -0.04398  -0.13697
 126        3S          0.04778   0.03793   0.24584   0.27745   0.24054
 127        3PX        -0.04596  -0.16457  -0.30184  -0.29703   0.08360
 128        3PY        -0.01509  -0.42186   0.11036   0.31911   0.54555
 129        3PZ        -0.13524   1.00621  -0.08666   0.06290   0.25511
 130        4XX        -0.00251  -0.00426   0.00317   0.01074   0.01538
 131        4YY        -0.01293   0.00391   0.00582   0.03068   0.02378
 132        4ZZ        -0.00286  -0.00270  -0.01021  -0.00234   0.00681
 133        4XY         0.00527  -0.00111   0.01040  -0.00606  -0.05652
 134        4XZ        -0.00004   0.01139   0.00718   0.00095  -0.01863
 135        4YZ        -0.00228  -0.01234   0.01366   0.01941  -0.00714
 136 10  C  1S         -0.00319  -0.00220  -0.03604  -0.04629  -0.01571
 137        2S          0.00618   0.02860   0.13818   0.17471   0.10350
 138        2PX        -0.05914   0.03433  -0.07861   0.03547   0.19812
 139        2PY         0.01188   0.11447   0.04753   0.01977  -0.06289
 140        2PZ         0.01737  -0.27938  -0.00283  -0.00330   0.07981
 141        3S         -0.04264  -0.14849  -0.87223  -1.18791  -0.54811
 142        3PX         0.14600   0.00486   0.39348   0.26000  -0.19277
 143        3PY         0.01562  -0.21366   0.46104   0.68898   0.37345
 144        3PZ        -0.01231   0.63979   0.21946   0.33108  -0.06012
 145        4XX         0.01791   0.00763   0.01012  -0.02550  -0.05479
 146        4YY        -0.01105  -0.06257  -0.04187  -0.03387   0.02610
 147        4ZZ        -0.01260   0.05181  -0.02935  -0.02288   0.00495
 148        4XY         0.00327  -0.01184  -0.02021  -0.03293  -0.00072
 149        4XZ         0.00947  -0.01413  -0.00219  -0.01437  -0.01819
 150        4YZ        -0.01028   0.07161  -0.00900  -0.00814  -0.00607
 151 11  H  1S          0.49897   0.01406   0.23239  -0.23251   0.32109
 152        2S         -0.19176   0.03111  -0.23539   0.13469  -0.52396
 153        3PX        -0.02836  -0.00065  -0.00531   0.01086  -0.02159
 154        3PY         0.02851   0.00514   0.03538  -0.01008  -0.01211
 155        3PZ        -0.02795   0.00048  -0.00380   0.00689  -0.03197
 156 12  H  1S          0.25925  -0.03331  -0.24943   0.01040   0.05730
 157        2S          0.11410   0.12577   0.31475  -0.02281   0.00736
 158        3PX         0.02465  -0.00433  -0.00623  -0.01732   0.03532
 159        3PY         0.02003  -0.00291  -0.00900  -0.00078  -0.01752
 160        3PZ        -0.00063  -0.00365  -0.01239  -0.00131  -0.00244
 161 13  H  1S          0.38540   0.05817   0.12851  -0.07064  -0.43905
 162        2S         -0.12000  -0.02128  -0.01098  -0.05046   0.99873
 163        3PX         0.03967   0.00444   0.02539  -0.01945  -0.01480
 164        3PY        -0.02068   0.00208  -0.00479  -0.00632   0.04843
 165        3PZ        -0.02565  -0.00531   0.01211   0.00371   0.01790
 166 14  H  1S         -0.25649  -0.03747   0.21406  -0.20919   0.04439
 167        2S          0.13252   0.02859  -0.23966   0.33611  -0.14039
 168        3PX         0.00851   0.00266  -0.01339   0.01518   0.00316
 169        3PY         0.00888   0.00076  -0.02490   0.02917  -0.01934
 170        3PZ        -0.04035  -0.00491   0.01072  -0.01234  -0.00383
 171 15  H  1S         -0.11411   0.00148   0.02102   0.06125  -0.03370
 172        2S         -0.03717  -0.02361   0.06651  -0.18754   0.07653
 173        3PX         0.00470  -0.00147   0.01583  -0.02190   0.01046
 174        3PY         0.00637  -0.00117   0.02333  -0.03162   0.01094
 175        3PZ         0.01472  -0.00009  -0.01979   0.00839   0.00681
 176 16  H  1S          0.04820  -0.01084  -0.14824  -0.32204  -0.30012
 177        2S         -0.15125  -0.06013  -0.11633   0.16895   0.50717
 178        3PX         0.00588   0.00288  -0.01581  -0.03954  -0.04117
 179        3PY         0.00299   0.00622   0.00045  -0.00425  -0.00109
 180        3PZ         0.00435  -0.01147  -0.00541  -0.01057  -0.01040
 181 17  H  1S         -0.02497  -0.34111  -0.31591  -0.35290  -0.03037
 182        2S          0.01519   0.68185   0.15831   0.09576  -0.21015
 183        3PX        -0.00324  -0.00449  -0.00600  -0.00600   0.00700
 184        3PY        -0.00254  -0.05443  -0.02867  -0.03155   0.00452
 185        3PZ         0.00237  -0.00292   0.02161   0.02358   0.00330
 186 18  H  1S         -0.08942   0.30440  -0.29790  -0.32531  -0.09043
 187        2S          0.12431  -0.59606   0.15025   0.02849  -0.00362
 188        3PX        -0.00115   0.00111   0.00137   0.00484   0.00722
 189        3PY        -0.00696   0.03323  -0.01070  -0.00823  -0.00268
 190        3PZ        -0.00924   0.02775  -0.03533  -0.03561  -0.00699
 191 19  H  1S          0.01086  -0.00310   0.12100   0.10898  -0.09735
 192        2S         -0.08361   0.00720  -0.02998   0.20766   0.49466
 193        3PX        -0.01144   0.00073  -0.00058   0.02483   0.03971
 194        3PY        -0.00330   0.00135  -0.02377  -0.01983   0.02927
 195        3PZ        -0.00171  -0.00714  -0.00990  -0.00437   0.01525
                          81        82        83        84        85
                           V         V         V         V         V
     Eigenvalues --     0.84840   0.85194   0.86428   0.86812   0.87375
   1 1   C  1S          0.02206   0.00219   0.00347  -0.00449   0.00182
   2        2S         -0.15943   0.15072   0.02358   0.07207   0.06080
   3        2PX        -0.36263   0.09552  -0.14188  -0.24129  -0.18418
   4        2PY        -0.15624   0.41263  -0.01546   0.13385   0.22574
   5        2PZ        -0.08229   0.16627  -0.03312  -0.06574   0.06982
   6        3S          0.69117  -0.31488  -0.06856   0.00507  -0.24831
   7        3PX         0.40124  -0.18595   0.28860   0.54618   0.47084
   8        3PY         0.04465  -0.70353  -0.08328  -0.40278  -0.48180
   9        3PZ         0.29445  -0.18101   0.00819   0.21095  -0.18791
  10        4XX        -0.03367   0.00034   0.00520  -0.00425   0.00798
  11        4YY         0.07070  -0.01873   0.00428   0.00006  -0.02072
  12        4ZZ        -0.00831   0.04037  -0.00019   0.00963   0.02135
  13        4XY         0.08060  -0.11394   0.02807   0.03019  -0.02838
  14        4XZ        -0.03841  -0.08221  -0.00835  -0.05428  -0.05058
  15        4YZ         0.08086  -0.00752   0.02644   0.03179   0.03497
  16 2   C  1S          0.00669   0.00398   0.00001   0.00326  -0.00210
  17        2S          0.13374   0.22304  -0.05087   0.07901   0.01126
  18        2PX        -0.03728  -0.00631   0.02716   0.06686   0.01355
  19        2PY         0.06961   0.05508  -0.06108  -0.00932  -0.08103
  20        2PZ        -0.13058  -0.03957  -0.02997  -0.01201   0.00338
  21        3S          0.27974  -0.54668   0.32287  -0.27869   0.01684
  22        3PX         0.27781  -0.10505  -0.02355  -0.20261  -0.14887
  23        3PY        -0.01747  -0.36171   0.25352   0.05420   0.15352
  24        3PZ         1.05659  -0.25311   0.24246   0.20961  -0.19564
  25        4XX        -0.01844   0.00783  -0.01155  -0.00995  -0.00566
  26        4YY         0.00392   0.04152  -0.00638   0.01344   0.01837
  27        4ZZ         0.05962  -0.01838   0.01425   0.00934  -0.01662
  28        4XY         0.00088   0.03001  -0.00637  -0.00697   0.01057
  29        4XZ         0.05617   0.01262   0.01614   0.04620   0.01971
  30        4YZ         0.01964  -0.02072   0.00497  -0.04064  -0.02225
  31 3   N  1S          0.01265  -0.00792   0.00446   0.00195   0.00050
  32        2S         -0.11010   0.15628  -0.04619  -0.02945   0.03750
  33        2PX         0.22318   0.03280  -0.01360   0.18220  -0.04276
  34        2PY         0.09674  -0.08230   0.07038  -0.12388  -0.04959
  35        2PZ        -0.19678   0.03989  -0.06882  -0.00020   0.03488
  36        3S         -0.40360   0.03332  -0.13368  -0.00056  -0.00871
  37        3PX        -0.36134  -0.02374   0.01770  -0.20434   0.10436
  38        3PY        -0.13386   0.20320  -0.14592   0.16823   0.08404
  39        3PZ         0.74685  -0.29653   0.24225   0.03843  -0.17247
  40        4XX         0.00074   0.02170  -0.00164  -0.03058   0.00352
  41        4YY        -0.00053  -0.00084   0.00535   0.02338   0.00571
  42        4ZZ        -0.03810   0.04364  -0.01957  -0.00473   0.00987
  43        4XY         0.02341  -0.00479   0.00607  -0.00316   0.00619
  44        4XZ        -0.05359   0.00519  -0.01360  -0.01741  -0.00492
  45        4YZ        -0.04359   0.03072  -0.01760   0.01446   0.00808
  46 4   O  1S          0.00102   0.00441  -0.00032  -0.00163  -0.00036
  47        2S          0.10688  -0.05905   0.06391  -0.00106  -0.01049
  48        2PX         0.10996   0.09627  -0.02102  -0.30051  -0.02582
  49        2PY        -0.01814  -0.01539   0.00553   0.18731   0.03891
  50        2PZ        -0.04669   0.04811  -0.04339  -0.00426  -0.00221
  51        3S         -0.13090  -0.01291  -0.05284   0.04362   0.02814
  52        3PX        -0.01051  -0.21394   0.06637   0.29806  -0.00341
  53        3PY         0.19425  -0.15449   0.02806  -0.10394  -0.12478
  54        3PZ        -0.20683   0.04843   0.00368  -0.03539   0.06161
  55        4XX         0.03772  -0.01729   0.02005  -0.01880  -0.00711
  56        4YY         0.04177  -0.02119   0.02579   0.01333   0.00168
  57        4ZZ        -0.01260  -0.00663   0.00657   0.00171  -0.00819
  58        4XY         0.01442  -0.00174   0.00661  -0.00438   0.00402
  59        4XZ         0.02192   0.00135   0.00484  -0.00057   0.00428
  60        4YZ         0.02140  -0.00914   0.00214   0.00541  -0.00069
  61 5   O  1S         -0.00911   0.00604  -0.00170  -0.00155   0.00165
  62        2S          0.20572  -0.07400   0.09126  -0.02688   0.00904
  63        2PX         0.06968   0.19304  -0.08117  -0.62023  -0.06079
  64        2PY        -0.27484  -0.03109   0.01024   0.40400   0.09753
  65        2PZ         0.07669   0.02565   0.01993  -0.00376   0.02778
  66        3S         -0.28521   0.07017  -0.15073   0.06394  -0.03936
  67        3PX         0.01681  -0.24741   0.10936   0.65708   0.05365
  68        3PY         0.41278  -0.04274   0.02228  -0.40875  -0.11928
  69        3PZ        -0.16861   0.03652  -0.03392  -0.01619   0.01030
  70        4XX         0.05890  -0.01565   0.02249  -0.02992  -0.00511
  71        4YY         0.03185  -0.01284   0.02239   0.01282   0.00716
  72        4ZZ         0.04711  -0.00784   0.02286  -0.01337   0.01089
  73        4XY        -0.03629   0.01721  -0.00975  -0.01033   0.00347
  74        4XZ        -0.02757   0.02038  -0.00725  -0.00161   0.01035
  75        4YZ        -0.03083   0.03318  -0.01068  -0.00470   0.01557
  76 6   O  1S          0.00294   0.00717   0.00344   0.00181   0.00727
  77        2S         -0.14935  -0.17176  -0.12281   0.06147  -0.22795
  78        2PX         0.08412   0.05104   0.09699  -0.06314   0.14718
  79        2PY         0.10814   0.25586   0.12987   0.01357   0.32274
  80        2PZ        -0.06497  -0.05730   0.02736   0.01903   0.02831
  81        3S          0.12330   0.09689   0.11381  -0.12565   0.20593
  82        3PX        -0.11300  -0.15987  -0.16587   0.03132  -0.30370
  83        3PY        -0.19477  -0.35283  -0.19020  -0.02949  -0.43154
  84        3PZ         0.00791  -0.01871  -0.07141  -0.00838  -0.10076
  85        4XX        -0.06119  -0.06376  -0.04943   0.01812  -0.08450
  86        4YY        -0.04547  -0.05661  -0.04132   0.02552  -0.07407
  87        4ZZ        -0.04446  -0.05059  -0.03527   0.01713  -0.07332
  88        4XY        -0.01310  -0.00529  -0.00808   0.00385  -0.00672
  89        4XZ        -0.02066  -0.01848  -0.00641   0.00438  -0.01396
  90        4YZ        -0.00257  -0.00071  -0.00458  -0.00059  -0.00594
  91 7   O  1S          0.00236   0.00415  -0.00887   0.00608  -0.01562
  92        2S         -0.12646  -0.08651   0.02916  -0.01453   0.05229
  93        2PX         0.08576   0.03261   0.02374  -0.03684   0.00672
  94        2PY        -0.02691   0.00297   0.08715  -0.05887   0.11117
  95        2PZ        -0.04561  -0.03743  -0.02601   0.08613   0.04795
  96        3S          0.13425   0.02323   0.24410  -0.15983   0.42950
  97        3PX        -0.21862  -0.21564   0.02846  -0.03316   0.06638
  98        3PY        -0.14374  -0.13254  -0.16873   0.05506  -0.30073
  99        3PZ        -0.01283  -0.07601  -0.08605  -0.13495  -0.08598
 100        4XX        -0.03553  -0.02730   0.02063  -0.01075   0.03287
 101        4YY        -0.02907   0.00528   0.01523   0.01196   0.03556
 102        4ZZ        -0.02866  -0.02347  -0.00053   0.00447   0.00177
 103        4XY         0.01119   0.02815   0.02673   0.00009   0.04207
 104        4XZ        -0.00010   0.00504   0.01099   0.00808   0.02877
 105        4YZ         0.00753   0.01948   0.00737  -0.00388   0.03331
 106 8   C  1S         -0.00037   0.00708  -0.00461   0.00214  -0.00745
 107        2S         -0.01396   0.29315  -0.23688   0.10039  -0.26317
 108        2PX        -0.03886   0.08622  -0.03680   0.07228  -0.07674
 109        2PY        -0.12212   0.03195   0.08539   0.01755  -0.01246
 110        2PZ         0.04292   0.00274  -0.19007  -0.01770   0.11897
 111        3S         -0.06876  -0.94183   0.50163  -0.32305   0.37053
 112        3PX        -0.12230  -0.72114   0.45620  -0.44993   0.66289
 113        3PY         0.62717   0.22703  -0.06453   0.02847   0.17181
 114        3PZ         0.00572   0.03912   0.48286   0.07633  -0.10843
 115        4XX         0.01769   0.03030  -0.03822   0.01102  -0.07152
 116        4YY        -0.02734   0.01931   0.03617   0.00160  -0.02796
 117        4ZZ         0.00483  -0.00582  -0.04791   0.00275   0.02967
 118        4XY         0.01668   0.03623  -0.00431   0.01503  -0.01579
 119        4XZ         0.01423   0.02190  -0.01932   0.00537  -0.01657
 120        4YZ         0.00215  -0.00941  -0.06787   0.00437   0.01096
 121 9   N  1S         -0.00413  -0.00772  -0.00790  -0.00052  -0.01270
 122        2S          0.08661   0.12357   0.08168   0.00035   0.13381
 123        2PX        -0.09742  -0.17780  -0.06166  -0.03331  -0.03990
 124        2PY        -0.08273  -0.18717  -0.19047  -0.00925  -0.14452
 125        2PZ        -0.14558   0.02696   0.27568   0.02809  -0.22558
 126        3S          0.15570   0.25708  -0.31780   0.21249  -0.45168
 127        3PX         0.07950   0.30442  -0.05394   0.12234  -0.16993
 128        3PY         0.29033   0.58614   0.18178   0.16704   0.04866
 129        3PZ         0.30742   0.09668  -0.53340   0.00790   0.28267
 130        4XX         0.01098   0.02130  -0.02236   0.01257  -0.03671
 131        4YY         0.02335   0.01083  -0.02149   0.00003   0.01223
 132        4ZZ         0.00297   0.00648   0.06475  -0.01267   0.05860
 133        4XY        -0.02886  -0.05343  -0.02064  -0.00868  -0.04339
 134        4XZ        -0.01103  -0.02165  -0.02784   0.00273  -0.04062
 135        4YZ        -0.00216   0.00777  -0.00355   0.00922  -0.06172
 136 10  C  1S         -0.00787   0.00001   0.00200   0.00028   0.00190
 137        2S          0.02920   0.11391  -0.07271   0.02977  -0.06257
 138        2PX         0.19705   0.31455  -0.05896   0.16361  -0.34964
 139        2PY        -0.10031  -0.02439   0.25781  -0.07576   0.07328
 140        2PZ         0.07768  -0.12016  -0.52077   0.01522   0.26209
 141        3S         -0.26658  -0.04836  -0.12861   0.06302  -0.16820
 142        3PX        -0.21434  -0.45644   0.03461  -0.20378   0.51069
 143        3PY         0.28287  -0.17632  -0.19977   0.01316   0.13963
 144        3PZ        -0.00595   0.16326   0.97948  -0.11280  -0.34140
 145        4XX        -0.06613  -0.08245   0.07873  -0.04849   0.07309
 146        4YY         0.02715   0.02760  -0.10846   0.01822   0.02359
 147        4ZZ         0.02046   0.07353   0.01724   0.03690  -0.10689
 148        4XY         0.00172   0.03961  -0.04228   0.03021  -0.05435
 149        4XZ        -0.00350  -0.03687  -0.06374  -0.01547   0.07183
 150        4YZ        -0.02422   0.03416   0.12870  -0.00776  -0.05093
 151 11  H  1S         -0.24042   0.00122  -0.08883  -0.25520  -0.11862
 152        2S          0.66222   0.07287   0.30490   0.75537   0.45437
 153        3PX         0.01383   0.00315   0.00582   0.02371   0.01075
 154        3PY        -0.01771   0.03576  -0.01611  -0.01850  -0.00682
 155        3PZ         0.00261   0.01811   0.00655   0.01804   0.01986
 156 12  H  1S          0.58837  -0.49139   0.14566   0.02958  -0.11777
 157        2S         -0.94256   1.15553  -0.22671  -0.09239   0.30333
 158        3PX         0.01439  -0.04707   0.00990   0.00460  -0.00771
 159        3PY         0.06569  -0.03127   0.00761   0.00151  -0.01228
 160        3PZ         0.02402  -0.02149   0.00927  -0.00288   0.00285
 161 13  H  1S          0.29279   0.40643   0.03327   0.07734   0.24186
 162        2S         -0.33747  -0.72964  -0.12326  -0.37459  -0.68020
 163        3PX        -0.01709   0.03880  -0.00180   0.00513   0.02180
 164        3PY        -0.02639  -0.01108  -0.00074   0.00024  -0.00865
 165        3PZ        -0.03527  -0.01518  -0.01226  -0.02095  -0.02462
 166 14  H  1S          0.15917  -0.09700   0.06339   0.01120   0.03555
 167        2S         -0.68953   0.35790  -0.21583  -0.05872   0.15666
 168        3PX        -0.04043   0.00310  -0.00657   0.01487   0.00621
 169        3PY        -0.03452   0.02491  -0.01392  -0.01707   0.00840
 170        3PZ         0.03380  -0.00930   0.01106  -0.00362  -0.00447
 171 15  H  1S         -0.24931   0.14597  -0.07423  -0.01102   0.05931
 172        2S          0.48834  -0.30017   0.16322   0.03129  -0.10095
 173        3PX         0.02508  -0.01557   0.00756   0.01657  -0.00246
 174        3PY         0.04054  -0.01572   0.00713  -0.00639  -0.00871
 175        3PZ         0.02797  -0.02832   0.01017   0.00650  -0.01338
 176 16  H  1S         -0.27908  -0.40392   0.29506  -0.23596   0.45797
 177        2S          0.50026   0.78098  -0.49462   0.44077  -0.84241
 178        3PX        -0.03635  -0.03946   0.03171  -0.02150   0.03495
 179        3PY        -0.00021   0.01725  -0.00352   0.01311  -0.03436
 180        3PZ         0.00354  -0.01131  -0.03935  -0.00308   0.02413
 181 17  H  1S          0.11539   0.01473  -0.61977   0.10162   0.08971
 182        2S         -0.34187   0.12706   1.31344  -0.18842  -0.31030
 183        3PX         0.00122   0.03003   0.00127   0.01779  -0.04550
 184        3PY         0.00603  -0.00552  -0.05093   0.00566   0.01857
 185        3PZ        -0.01312  -0.00626   0.03977  -0.01298   0.01530
 186 18  H  1S         -0.04780   0.26089   0.41857   0.09999  -0.47991
 187        2S         -0.05496  -0.50014  -1.06826  -0.12381   0.94052
 188        3PX         0.01291   0.00949  -0.04864   0.00671   0.00618
 189        3PY        -0.00648   0.00026   0.03469  -0.01064   0.00650
 190        3PZ         0.00544   0.03700   0.02134   0.01708  -0.05344
 191 19  H  1S         -0.04335  -0.10728  -0.19901   0.03465  -0.36885
 192        2S          0.32684   0.45559   0.20067   0.04720   0.45775
 193        3PX         0.02511   0.02630   0.02600  -0.00383   0.04681
 194        3PY         0.01472   0.03456   0.01198   0.00637   0.02592
 195        3PZ         0.01247   0.01812   0.00109   0.00099   0.02467
                          86        87        88        89        90
                           V         V         V         V         V
     Eigenvalues --     0.89152   0.90993   0.91839   0.93578   0.94825
   1 1   C  1S          0.01819   0.00297  -0.01165   0.00501  -0.00334
   2        2S         -0.70412  -0.13143   0.16423   0.35855  -0.32244
   3        2PX         0.05956  -0.19642   0.11886   0.19316  -0.02270
   4        2PY        -0.09401  -0.16365   0.17457   0.06842  -0.05283
   5        2PZ         0.32685  -0.11806   0.05213  -0.10600   0.11470
   6        3S          0.58983   0.60813  -0.31565  -0.89792   0.93709
   7        3PX         0.20837   0.31548  -0.20378  -0.60429   0.13986
   8        3PY         0.47128   0.28267  -0.29069  -0.41083   0.26429
   9        3PZ        -1.26846   0.40707  -0.00895   0.05088  -0.04096
  10        4XX         0.06768  -0.04901   0.01773   0.00646  -0.00418
  11        4YY        -0.05007   0.00801  -0.00097  -0.00716   0.00534
  12        4ZZ        -0.09166   0.04476  -0.02275   0.04336  -0.03577
  13        4XY        -0.06764   0.06707  -0.04475  -0.02527   0.00340
  14        4XZ         0.08933   0.01086  -0.03196  -0.00801   0.00155
  15        4YZ         0.03724   0.03044  -0.04088  -0.01846  -0.00075
  16 2   C  1S         -0.02714   0.01151  -0.00545   0.01792  -0.00958
  17        2S         -0.76486   0.32140  -0.02799  -0.01222   0.10952
  18        2PX        -0.00036  -0.08187   0.04084   0.04746   0.02071
  19        2PY        -0.26458   0.01923   0.08511  -0.05124   0.04900
  20        2PZ         0.09730  -0.02959   0.07757  -0.26031   0.15765
  21        3S          2.20861  -1.30214   0.08184   0.56537  -0.56222
  22        3PX         0.11145  -0.04539  -0.10201   0.33016  -0.24417
  23        3PY         0.77145  -0.28055  -0.17129   0.48644  -0.41637
  24        3PZ        -0.99782  -0.14425   0.05197   0.92893  -0.45615
  25        4XX        -0.00217   0.02386  -0.01357  -0.00050  -0.00095
  26        4YY        -0.05035   0.05962  -0.03438   0.00613  -0.00185
  27        4ZZ        -0.06713  -0.02427   0.02669   0.02337  -0.00640
  28        4XY        -0.03788   0.05374  -0.03396   0.01240  -0.00328
  29        4XZ         0.02315  -0.02222  -0.01072   0.04439  -0.02028
  30        4YZ         0.06229  -0.03363  -0.00920   0.04768  -0.02934
  31 3   N  1S         -0.00665  -0.00754   0.01026  -0.01721   0.00996
  32        2S          0.09904   0.13189  -0.24873   0.35136  -0.18998
  33        2PX        -0.00903  -0.19153   0.04353   0.22938  -0.06370
  34        2PY         0.02096  -0.26839   0.12737   0.24724  -0.15898
  35        2PZ        -0.03921   0.32895  -0.21085  -0.10348   0.04660
  36        3S         -0.18256  -0.06457   0.55495  -1.17076   0.70547
  37        3PX        -0.03700   0.30582  -0.02664  -0.53721   0.23182
  38        3PY        -0.25963   0.50123  -0.12157  -0.67976   0.44376
  39        3PZ        -0.00768  -0.88702   0.45585   0.60599  -0.31250
  40        4XX         0.03321   0.01209  -0.04806   0.09184  -0.06206
  41        4YY         0.00559  -0.01771  -0.00007   0.01745  -0.00751
  42        4ZZ         0.00477   0.03238  -0.03875   0.03121  -0.00510
  43        4XY        -0.06088  -0.02940   0.07563  -0.12744   0.08034
  44        4XZ        -0.01269   0.04098  -0.01816  -0.00697  -0.00209
  45        4YZ        -0.02906   0.05885  -0.03390   0.01075  -0.00166
  46 4   O  1S          0.00815  -0.01417   0.00852   0.00139   0.00047
  47        2S          0.04362  -0.27792   0.16284   0.07040  -0.06424
  48        2PX        -0.01662   0.12549  -0.13757   0.14377  -0.07345
  49        2PY         0.06392   0.17425  -0.20164   0.10622  -0.08128
  50        2PZ         0.07125   0.17390  -0.15249   0.04728   0.00158
  51        3S         -0.26025   0.63776  -0.42988   0.12170  -0.05969
  52        3PX        -0.09424  -0.14922   0.20066  -0.17841   0.07932
  53        3PY        -0.30040  -0.19281   0.28606  -0.10709   0.10074
  54        3PZ         0.12224  -0.21486   0.15728  -0.10282   0.00940
  55        4XX         0.03330  -0.10296   0.05856   0.01634  -0.01899
  56        4YY         0.03253  -0.10096   0.05045   0.03271  -0.02607
  57        4ZZ         0.00023  -0.10775   0.08342   0.00557  -0.00161
  58        4XY        -0.01513   0.01155  -0.01216   0.01911  -0.01163
  59        4XZ        -0.02833   0.02505  -0.01468   0.00791  -0.00564
  60        4YZ        -0.02595   0.03712  -0.02322   0.00119  -0.00583
  61 5   O  1S          0.00741  -0.00235  -0.00225   0.00951  -0.00640
  62        2S          0.17800  -0.24582   0.06978   0.19138  -0.15952
  63        2PX        -0.06421   0.11432  -0.02768  -0.08210  -0.00214
  64        2PY         0.19037   0.02384  -0.09925   0.05689   0.00386
  65        2PZ         0.10637   0.05834  -0.11341   0.11421  -0.08394
  66        3S         -0.37310   0.46312  -0.10116  -0.43358   0.35924
  67        3PX         0.03100  -0.17045   0.09186   0.03737   0.04345
  68        3PY        -0.26577  -0.08140   0.20238  -0.17676   0.05852
  69        3PZ        -0.04516  -0.07128   0.11600  -0.15620   0.10646
  70        4XX         0.04466  -0.07198   0.02296   0.06397  -0.05500
  71        4YY         0.06347  -0.08784   0.03073   0.06056  -0.04232
  72        4ZZ         0.07944  -0.04191  -0.01603   0.07510  -0.05862
  73        4XY        -0.00269  -0.00206   0.01627  -0.02755   0.01843
  74        4XZ         0.00165   0.03787  -0.03041   0.00266  -0.00215
  75        4YZ         0.00042   0.05306  -0.04221   0.00032  -0.00245
  76 6   O  1S          0.00076   0.01054   0.00877  -0.00466  -0.00478
  77        2S          0.01820   0.14972   0.13696  -0.07732  -0.01906
  78        2PX         0.09219  -0.01026   0.06946   0.05917  -0.05454
  79        2PY         0.08892  -0.00228  -0.05406  -0.07117   0.09161
  80        2PZ        -0.25804   0.09610   0.04817  -0.02357  -0.04432
  81        3S         -0.06449  -0.37724  -0.31288   0.14226   0.05668
  82        3PX        -0.13807  -0.04107  -0.10610   0.01671   0.09083
  83        3PY        -0.10021  -0.09187  -0.00995   0.04313  -0.09628
  84        3PZ         0.21322  -0.14030  -0.07277   0.03663   0.04247
  85        4XX         0.00851   0.04493   0.05203  -0.04649  -0.03005
  86        4YY         0.00149   0.06192   0.05351  -0.02226  -0.00060
  87        4ZZ        -0.00505   0.05749   0.04778  -0.01569  -0.01098
  88        4XY         0.00280   0.00352   0.00549  -0.00920   0.01147
  89        4XZ        -0.01482   0.00514   0.00588  -0.00873  -0.00295
  90        4YZ         0.00733   0.00175   0.00525  -0.00390   0.00691
  91 7   O  1S          0.00425   0.00442   0.00581  -0.00041   0.00088
  92        2S          0.04615   0.05092   0.06760  -0.20268  -0.16126
  93        2PX         0.02251  -0.01135  -0.00507   0.13519  -0.01963
  94        2PY         0.06827  -0.02014  -0.05117  -0.13423  -0.07070
  95        2PZ        -0.14102   0.01974   0.04195   0.00321  -0.07010
  96        3S         -0.19436  -0.14053  -0.16882   0.24563  -0.02537
  97        3PX        -0.13535  -0.15824  -0.14312  -0.20685  -0.04561
  98        3PY        -0.15907  -0.17268  -0.10805   0.14211   0.05811
  99        3PZ         0.10868  -0.11864  -0.13997  -0.02367   0.06739
 100        4XX         0.00660   0.00871   0.00986  -0.06069  -0.05867
 101        4YY         0.01907   0.02982   0.03573  -0.07948  -0.04639
 102        4ZZ         0.02727   0.04223   0.04621  -0.05832  -0.04071
 103        4XY         0.02091   0.03555   0.03050  -0.01670   0.00150
 104        4XZ        -0.01074   0.01200   0.00894  -0.00859  -0.00639
 105        4YZ         0.00791  -0.00106  -0.00582  -0.01920  -0.00081
 106 8   C  1S         -0.00648  -0.01811  -0.02058  -0.00713  -0.01328
 107        2S         -0.23612  -0.60739  -0.73016  -0.09790   0.18180
 108        2PX        -0.04351  -0.10828  -0.15559  -0.10308   0.05118
 109        2PY        -0.05378  -0.02332  -0.00166  -0.10234  -0.24273
 110        2PZ         0.07596  -0.05125  -0.03905  -0.05907  -0.06376
 111        3S          0.61080   1.62175   2.02581   0.40953  -0.80178
 112        3PX         0.08204   0.47301   0.70733   0.07279  -0.90539
 113        3PY         0.39752   0.61139   0.57081   0.33969   0.68306
 114        3PZ        -0.09663   0.38147   0.40906   0.16888   0.04651
 115        4XX        -0.01125  -0.04697  -0.04939   0.03208   0.00337
 116        4YY        -0.01964  -0.05192  -0.06634  -0.02892  -0.00593
 117        4ZZ        -0.00424   0.00234   0.00625  -0.00548   0.00400
 118        4XY        -0.01105  -0.03654  -0.05492  -0.00356   0.06388
 119        4XZ        -0.00142  -0.02717  -0.03375   0.00618   0.02713
 120        4YZ        -0.02300  -0.03755  -0.04110  -0.00813   0.00142
 121 9   N  1S         -0.00558  -0.01289  -0.01586   0.00681   0.01855
 122        2S          0.06228   0.08028   0.09299  -0.06412  -0.20222
 123        2PX         0.02115   0.03061   0.08892  -0.12185  -0.31073
 124        2PY         0.00505   0.04899   0.10823  -0.05256  -0.25051
 125        2PZ        -0.00893   0.02936   0.05482  -0.03900  -0.15155
 126        3S         -0.07071  -0.17555  -0.31419   0.10867   0.80976
 127        3PX        -0.10433  -0.28455  -0.44433   0.19633   0.77557
 128        3PY         0.00081  -0.13719  -0.31837   0.16089   0.89929
 129        3PZ         0.06188  -0.11960  -0.20526   0.09047   0.50348
 130        4XX        -0.00698  -0.03958  -0.05764  -0.00376   0.05087
 131        4YY         0.00622  -0.00138   0.00090   0.00124  -0.01233
 132        4ZZ         0.02782   0.06450   0.08414  -0.02363  -0.11294
 133        4XY        -0.00386  -0.00125   0.01068   0.01865  -0.01040
 134        4XZ        -0.01509  -0.01902  -0.02251   0.01196   0.02708
 135        4YZ        -0.01373  -0.03650  -0.04798   0.01653   0.05604
 136 10  C  1S          0.00102   0.01095   0.01414   0.00770   0.00176
 137        2S         -0.07272  -0.40436  -0.47921  -0.56383  -0.73953
 138        2PX         0.14985   0.13749   0.11186  -0.18321  -0.20636
 139        2PY        -0.08867  -0.20924  -0.26088  -0.15692  -0.18172
 140        2PZ        -0.03426  -0.05208   0.00024  -0.06585  -0.16510
 141        3S         -0.13227   0.14950   0.20189   1.17582   2.05112
 142        3PX        -0.20190  -0.06683  -0.02507   0.47928   0.70691
 143        3PY         0.30634   0.90376   1.09854   0.47850   0.20748
 144        3PZ         0.23795   0.28503   0.19969   0.20315   0.37428
 145        4XX        -0.04609  -0.05098  -0.06312   0.00702   0.01928
 146        4YY        -0.01167  -0.05183  -0.05086  -0.02726  -0.03445
 147        4ZZ         0.04130   0.05466   0.06239  -0.02834  -0.04929
 148        4XY        -0.00634  -0.02810  -0.03007  -0.05511  -0.04814
 149        4XZ        -0.00789  -0.04713  -0.04655  -0.01126  -0.00016
 150        4YZ        -0.02130  -0.05337  -0.08515  -0.02573   0.00874
 151 11  H  1S          0.56076  -0.13213  -0.02918   0.00508   0.08002
 152        2S         -1.31812   0.33311   0.00387   0.00659  -0.28357
 153        3PX        -0.07273   0.01965   0.00157   0.00731  -0.01621
 154        3PY         0.00106  -0.01585   0.01749   0.00299   0.00961
 155        3PZ        -0.00335  -0.01849   0.01686  -0.00425  -0.00089
 156 12  H  1S          0.17161   0.27607  -0.33279  -0.13126   0.04604
 157        2S         -0.40306  -0.77167   0.66721   0.78629  -0.41255
 158        3PX         0.02985   0.01538  -0.01852  -0.01866   0.00706
 159        3PY        -0.00883   0.03009  -0.02214  -0.01594   0.01263
 160        3PZ         0.03262   0.02252  -0.03095   0.00550  -0.01063
 161 13  H  1S          0.17547  -0.03101  -0.01504  -0.04260   0.06445
 162        2S         -0.66492   0.10353  -0.02405   0.32806  -0.22161
 163        3PX         0.03325  -0.02300   0.01705  -0.00840   0.00898
 164        3PY        -0.03496  -0.00011   0.00357   0.02394  -0.01381
 165        3PZ         0.00845  -0.02157   0.01722   0.00141   0.00013
 166 14  H  1S         -0.04275  -0.23217   0.32162  -0.55094   0.33364
 167        2S          0.20669   0.98297  -0.82630   0.18353  -0.17387
 168        3PX         0.02401   0.04138  -0.04274   0.02124  -0.01689
 169        3PY         0.02008   0.06648  -0.06250   0.02790  -0.02142
 170        3PZ         0.02683  -0.04956   0.01442   0.04064  -0.02191
 171 15  H  1S         -0.01705   0.19362  -0.08348  -0.14282   0.09599
 172        2S         -0.03654  -0.51326   0.35733   0.09138  -0.08659
 173        3PX        -0.00650  -0.00643   0.00113   0.00992  -0.00475
 174        3PY        -0.01931  -0.00088   0.00163   0.00827  -0.00758
 175        3PZ        -0.02135  -0.06023   0.05903  -0.01933   0.01257
 176 16  H  1S         -0.12885  -0.01693  -0.00914   0.27507   0.30155
 177        2S          0.32858   0.13162   0.13080  -0.82010  -1.22378
 178        3PX        -0.01945  -0.00624  -0.00353   0.03429   0.04147
 179        3PY        -0.00185  -0.01246  -0.01787  -0.02683  -0.01673
 180        3PZ         0.00535  -0.01045  -0.00708  -0.00105   0.00366
 181 17  H  1S          0.10887   0.23909   0.37336   0.19184   0.11186
 182        2S         -0.22944  -0.70050  -1.01206  -0.57551  -0.41796
 183        3PX        -0.00403  -0.00183  -0.00163  -0.01536  -0.01711
 184        3PY        -0.00422   0.00652   0.01256   0.02149   0.02369
 185        3PZ        -0.02041  -0.04264  -0.05364  -0.01662  -0.01337
 186 18  H  1S          0.09268   0.29450   0.29621   0.13416   0.15380
 187        2S         -0.34652  -0.75184  -0.71900  -0.43665  -0.63964
 188        3PX         0.00239  -0.02133  -0.01853  -0.02159  -0.02546
 189        3PY        -0.00671  -0.01792  -0.02690   0.00381   0.01299
 190        3PZ         0.01907   0.03357   0.03598   0.01605   0.02599
 191 19  H  1S         -0.09008  -0.20532  -0.26743   0.17423   0.46943
 192        2S          0.14352   0.14579   0.08802   0.03068   0.26487
 193        3PX         0.01267   0.02370   0.02643   0.01015   0.00086
 194        3PY        -0.00429  -0.00896  -0.02212  -0.00270   0.03330
 195        3PZ         0.00669  -0.00269  -0.00578   0.00093   0.01483
                          91        92        93        94        95
                           V         V         V         V         V
     Eigenvalues --     0.98090   0.99634   1.01556   1.02633   1.05176
   1 1   C  1S         -0.00817  -0.00258  -0.00231   0.00596  -0.02382
   2        2S         -0.42473  -0.08307   0.30255   0.09361  -0.74828
   3        2PX         0.07910  -0.10434   0.04330  -0.01091   0.08928
   4        2PY        -0.08301   0.08540  -0.07840   0.05771  -0.13057
   5        2PZ         0.04137  -0.03718  -0.13705   0.14508   0.07060
   6        3S          1.04898  -0.15014  -0.42754  -0.53121   2.51134
   7        3PX        -0.24664   0.46835  -0.08639  -0.06550  -0.28294
   8        3PY         0.36533  -0.18125  -0.09798  -0.29537   0.10371
   9        3PZ        -0.09242  -0.13619   0.54176  -0.76306   0.10624
  10        4XX        -0.03008   0.00667   0.02376  -0.01057  -0.03819
  11        4YY         0.03051  -0.00592  -0.01078  -0.00466  -0.01401
  12        4ZZ        -0.05445  -0.01526   0.01013   0.02263  -0.03732
  13        4XY        -0.01743  -0.01265   0.04429  -0.03755   0.01151
  14        4XZ         0.00976  -0.02258   0.00177   0.00350  -0.02486
  15        4YZ        -0.00987   0.03211  -0.03140   0.06956   0.00776
  16 2   C  1S         -0.00255  -0.00684   0.01500  -0.00203   0.00981
  17        2S         -0.10362  -0.33303   0.30013  -0.40298   0.26043
  18        2PX        -0.07450  -0.04048   0.11501  -0.12835   0.06164
  19        2PY         0.10338  -0.00653  -0.06093  -0.13008  -0.01427
  20        2PZ         0.04042  -0.01179  -0.03634  -0.08079  -0.01052
  21        3S         -0.13861   0.30078  -0.07415   2.46096  -0.95094
  22        3PX         0.35907  -0.14674  -0.46157   0.33109  -0.04454
  23        3PY        -0.20236   0.51879   0.11175   0.46549   0.02428
  24        3PZ        -0.05986  -0.25604   0.68566   0.51454   0.84916
  25        4XX         0.00470  -0.01592  -0.02173  -0.00634  -0.03366
  26        4YY        -0.02115   0.00152   0.02523   0.02827   0.01344
  27        4ZZ        -0.00169  -0.03277   0.05959   0.00736   0.03434
  28        4XY        -0.02850  -0.05750   0.03580   0.01803   0.00255
  29        4XZ        -0.00151  -0.02442  -0.00022   0.06960   0.01134
  30        4YZ        -0.00031   0.01579   0.03785   0.08489  -0.00700
  31 3   N  1S         -0.00734  -0.01191   0.01034   0.01207  -0.00142
  32        2S         -0.06503  -0.00778   0.04254  -0.02747  -0.03038
  33        2PX         0.08134  -0.10590   0.06341   0.04175   0.00696
  34        2PY        -0.01349   0.10917   0.07546   0.16487   0.06512
  35        2PZ        -0.01037   0.05274  -0.14818  -0.32602  -0.06227
  36        3S          0.25253   0.03659  -0.28947  -0.61688  -0.07940
  37        3PX        -0.25920   0.13930   0.04950  -0.18910  -0.04835
  38        3PY        -0.01481  -0.37722  -0.17266  -0.41754  -0.17214
  39        3PZ         0.03208  -0.18341   0.60220   1.14374   0.34529
  40        4XX        -0.00891   0.02374  -0.02165   0.01564  -0.02738
  41        4YY        -0.01873  -0.01471   0.02689   0.02869   0.00175
  42        4ZZ        -0.01250  -0.02386   0.02281  -0.03529   0.00714
  43        4XY        -0.02016  -0.07179   0.04531   0.00670   0.00785
  44        4XZ        -0.00156   0.04813  -0.00458  -0.06089   0.00718
  45        4YZ         0.01934  -0.00594  -0.04971  -0.09432   0.00835
  46 4   O  1S          0.00168   0.00309  -0.00690  -0.00745  -0.00306
  47        2S         -0.05226   0.08498  -0.13821  -0.19124  -0.14024
  48        2PX         0.07604  -0.55938  -0.25490   0.11742  -0.10429
  49        2PY        -0.14492   0.28852   0.32524   0.28137  -0.04382
  50        2PZ         0.07669   0.01222   0.04785  -0.02456   0.18805
  51        3S          0.04855  -0.15990   0.39318   0.50641   0.44864
  52        3PX        -0.09626   0.90631   0.35722  -0.41034   0.28543
  53        3PY         0.34629  -0.34315  -0.56800  -0.76416   0.24218
  54        3PZ        -0.14967  -0.03269  -0.06152   0.27234  -0.41631
  55        4XX        -0.01198   0.02685  -0.05820  -0.03481  -0.07254
  56        4YY        -0.02610   0.02786  -0.03679  -0.03433  -0.05891
  57        4ZZ         0.00974   0.03124  -0.03836  -0.09586   0.01620
  58        4XY        -0.01081  -0.01266   0.01105  -0.00181   0.02732
  59        4XZ         0.00366  -0.02890  -0.02672  -0.01668   0.00611
  60        4YZ        -0.01198   0.01832   0.01443  -0.03338  -0.01230
  61 5   O  1S         -0.00098   0.00892  -0.01117  -0.01244  -0.00512
  62        2S         -0.04070   0.27978  -0.36108  -0.44719  -0.18349
  63        2PX        -0.08971   0.22517   0.19419   0.25682   0.02353
  64        2PY        -0.01094  -0.27920   0.06629   0.28203  -0.04054
  65        2PZ        -0.02618   0.07006  -0.11790  -0.07840  -0.12155
  66        3S          0.13692  -0.55879   0.74499   0.82622   0.50511
  67        3PX         0.17076  -0.38380  -0.37356  -0.51398   0.01441
  68        3PY         0.04015   0.45984  -0.10761  -0.61419   0.14893
  69        3PZ        -0.05489  -0.19112   0.27250   0.44402   0.05694
  70        4XX        -0.00689   0.11837  -0.10260  -0.11829  -0.04924
  71        4YY        -0.00018   0.05655  -0.10881  -0.14131  -0.03956
  72        4ZZ        -0.01707   0.08971  -0.11711  -0.14732  -0.05443
  73        4XY         0.00718   0.00609   0.01554   0.00431   0.03849
  74        4XZ        -0.00772  -0.05704  -0.00499   0.03918  -0.02420
  75        4YZ        -0.03038  -0.00929   0.04581   0.06549  -0.02483
  76 6   O  1S          0.00981   0.00270   0.00111  -0.00100   0.00060
  77        2S          0.28809   0.17624   0.12454  -0.03288  -0.10062
  78        2PX        -0.31782  -0.11602  -0.02788  -0.00830   0.06493
  79        2PY        -0.24408   0.03695   0.02272  -0.15999   0.22600
  80        2PZ         0.13625   0.10546  -0.47478   0.38353  -0.10643
  81        3S         -0.47177  -0.27057  -0.15839   0.06460   0.02403
  82        3PX         0.36465   0.04126   0.09592  -0.01812  -0.10381
  83        3PY         0.46892   0.00345   0.07854   0.18824  -0.53583
  84        3PZ        -0.05240  -0.07343   0.56204  -0.41864   0.16228
  85        4XX         0.10108   0.06065   0.03381   0.00290  -0.06170
  86        4YY         0.13579   0.06086   0.05801  -0.02104  -0.01091
  87        4ZZ         0.10203   0.03614   0.04912  -0.01616  -0.04834
  88        4XY        -0.02225   0.02419  -0.00870  -0.00032   0.00190
  89        4XZ        -0.00914   0.01338   0.00309  -0.00888  -0.02290
  90        4YZ         0.02254   0.01144  -0.01269   0.01675  -0.03087
  91 7   O  1S          0.00185   0.00311  -0.00289   0.00292  -0.00741
  92        2S         -0.03011   0.15361  -0.15898   0.06377  -0.23555
  93        2PX         0.08704  -0.20016   0.15002  -0.07160   0.15259
  94        2PY        -0.21601  -0.00916  -0.06697  -0.02900  -0.30234
  95        2PZ         0.05213   0.15940  -0.25302   0.18062   0.56337
  96        3S         -0.05107  -0.37584   0.34926  -0.21187   0.63736
  97        3PX         0.01547   0.27834  -0.07410   0.08929  -0.40906
  98        3PY         0.43296  -0.00203   0.22431   0.00615   0.36060
  99        3PZ         0.04786  -0.21283   0.35279  -0.19686  -0.92099
 100        4XX        -0.00165   0.03440  -0.04299   0.01994  -0.06854
 101        4YY        -0.03776   0.07608  -0.06405   0.01919  -0.05583
 102        4ZZ        -0.02652   0.04936  -0.06479   0.03046  -0.09766
 103        4XY        -0.05373   0.01650  -0.04288   0.00556   0.00208
 104        4XZ        -0.01622   0.01567  -0.01862   0.00075   0.01477
 105        4YZ        -0.00908   0.01350  -0.02360   0.01393  -0.01851
 106 8   C  1S          0.01494  -0.00758   0.01082  -0.00337   0.00993
 107        2S          0.27332   0.02967   0.12484  -0.02072  -0.00281
 108        2PX         0.03004   0.12225  -0.08070   0.06257  -0.10735
 109        2PY         0.13184  -0.02856   0.04961   0.00128   0.10503
 110        2PZ        -0.00090  -0.04400   0.11286  -0.08131  -0.07911
 111        3S         -1.39855  -0.59125  -0.42976  -0.07281   0.81605
 112        3PX        -0.39279  -0.55726   0.25771  -0.26011   0.36543
 113        3PY         0.05887   0.18412  -0.09285   0.01244  -0.62610
 114        3PZ         0.11768   0.18661  -0.32099   0.23266   0.42603
 115        4XX         0.02006  -0.05782   0.04007  -0.02020   0.07403
 116        4YY        -0.00973   0.00286   0.00975  -0.01535   0.00791
 117        4ZZ         0.01793   0.02170  -0.02286   0.02205  -0.02280
 118        4XY         0.05621   0.03524   0.01713  -0.00064  -0.05656
 119        4XZ         0.03004   0.00548   0.00307   0.00867   0.03002
 120        4YZ         0.01738   0.00568  -0.01395   0.01729  -0.01253
 121 9   N  1S         -0.02247  -0.00046  -0.00966   0.00202   0.00380
 122        2S          0.27794  -0.04940   0.11539  -0.03172   0.01336
 123        2PX        -0.16957  -0.07018  -0.01277  -0.01258   0.06757
 124        2PY        -0.36367  -0.12636  -0.07458  -0.01497   0.14709
 125        2PZ        -0.18601  -0.04969  -0.01293  -0.02937   0.14877
 126        3S         -0.23777   0.37429  -0.29020   0.14440  -0.36601
 127        3PX         0.15206   0.21629  -0.10691   0.08923  -0.13889
 128        3PY         0.96201   0.49089   0.10697   0.12971  -0.55345
 129        3PZ         0.39758   0.16561   0.07248   0.03903  -0.54045
 130        4XX        -0.04344   0.01524  -0.03090   0.00626  -0.00823
 131        4YY         0.02397  -0.01597   0.01772  -0.00637  -0.02179
 132        4ZZ         0.08448  -0.02144   0.03943  -0.00895   0.04018
 133        4XY        -0.11778  -0.03427  -0.01862  -0.00869   0.04393
 134        4XZ        -0.06293  -0.00201  -0.04069   0.01874   0.01048
 135        4YZ        -0.05596   0.00571  -0.02843   0.00885   0.03722
 136 10  C  1S          0.01072  -0.00142   0.00506  -0.00168   0.00258
 137        2S         -0.01538  -0.10770  -0.00858  -0.02938   0.15756
 138        2PX        -0.08510   0.01016  -0.06116   0.00633  -0.05111
 139        2PY         0.10212  -0.03742   0.05854  -0.03065   0.02953
 140        2PZ         0.02337   0.00361  -0.03058   0.02316   0.04505
 141        3S          0.25287   0.40924   0.11339   0.11395  -0.45348
 142        3PX         0.23756   0.13167   0.03093   0.05863  -0.04212
 143        3PY        -0.35668  -0.02815  -0.20887   0.06419   0.10249
 144        3PZ        -0.15226  -0.10749   0.17171  -0.16487  -0.32577
 145        4XX         0.01519   0.00451  -0.01216   0.01213   0.00708
 146        4YY         0.03827  -0.00285   0.01323   0.00078   0.03222
 147        4ZZ        -0.02722  -0.00992   0.01341  -0.01778  -0.02507
 148        4XY         0.00684   0.02173  -0.01833   0.01799  -0.01154
 149        4XZ        -0.01157  -0.00543   0.03037  -0.03010  -0.01615
 150        4YZ         0.02885  -0.00436   0.01570  -0.00673  -0.01621
 151 11  H  1S          0.05942  -0.07917  -0.00807  -0.00900   0.04829
 152        2S         -0.52562   0.31786   0.28138  -0.08104  -0.65273
 153        3PX        -0.00960   0.00246   0.00346  -0.00280  -0.02015
 154        3PY         0.02749  -0.00477  -0.01127  -0.01245   0.02411
 155        3PZ        -0.00542   0.01631   0.00451  -0.00940  -0.01135
 156 12  H  1S         -0.00162  -0.05140   0.01990   0.09528  -0.01500
 157        2S         -0.33133  -0.03270   0.04773   0.34243  -0.52527
 158        3PX        -0.01303   0.00812   0.02075  -0.01789  -0.00456
 159        3PY         0.02255  -0.01275  -0.01262  -0.00355   0.02308
 160        3PZ        -0.00381   0.01029  -0.00921   0.02453   0.00557
 161 13  H  1S          0.03560   0.03012  -0.27194   0.20322   0.05428
 162        2S         -0.10126  -0.37520   0.74259  -0.59338  -0.37487
 163        3PX         0.00006   0.00301  -0.01032  -0.01064   0.00275
 164        3PY        -0.01864  -0.00401   0.03759  -0.01856   0.01451
 165        3PZ         0.01573  -0.00087  -0.00499  -0.01032  -0.01816
 166 14  H  1S         -0.11850  -0.28231   0.21683   0.31755  -0.06094
 167        2S         -0.04973   0.38390  -0.68619  -1.11036  -0.34394
 168        3PX        -0.00156   0.02378  -0.02710  -0.03136  -0.01242
 169        3PY        -0.00103   0.02828  -0.03988  -0.05035  -0.02123
 170        3PZ        -0.00389   0.00292   0.01714   0.04692  -0.00459
 171 15  H  1S         -0.02114  -0.11841   0.09629   0.07922   0.05497
 172        2S          0.08437   0.34344  -0.45167  -0.79058  -0.05675
 173        3PX         0.00162  -0.00340  -0.01195  -0.03040  -0.00513
 174        3PY         0.00275   0.01495  -0.01606  -0.03187  -0.00204
 175        3PZ         0.01881   0.02410  -0.02661  -0.06965   0.02131
 176 16  H  1S          0.04614  -0.01715   0.01689  -0.00636   0.05319
 177        2S         -0.26842  -0.13356  -0.09997  -0.02673   0.10891
 178        3PX         0.01537   0.00270   0.00446   0.00302   0.00590
 179        3PY        -0.00875   0.01220  -0.02003   0.01211  -0.00576
 180        3PZ        -0.01334  -0.00527   0.01773  -0.01811  -0.02031
 181 17  H  1S         -0.01241   0.01024   0.04508  -0.02014  -0.01851
 182        2S          0.16136  -0.11272   0.12405  -0.09105  -0.05290
 183        3PX         0.01346   0.00865  -0.00830   0.01348   0.00683
 184        3PY         0.01124   0.00567  -0.00180   0.00565   0.00797
 185        3PZ         0.01301  -0.00438   0.00353  -0.00029   0.01795
 186 18  H  1S          0.03091   0.01455   0.00167   0.01803  -0.01765
 187        2S          0.15053  -0.00729  -0.03831   0.03746   0.30767
 188        3PX        -0.00217  -0.00621   0.01947  -0.01497  -0.00641
 189        3PY         0.00898  -0.00766   0.01126  -0.00688   0.00127
 190        3PZ        -0.00466   0.00501   0.00680  -0.00495  -0.01250
 191 19  H  1S         -0.63211   0.01695  -0.28009   0.06201   0.08099
 192        2S          1.43913   0.30925   0.42166   0.02766  -0.61790
 193        3PX         0.09525   0.00631   0.03477  -0.00086  -0.02463
 194        3PY         0.06118   0.02508  -0.00157   0.01021  -0.02373
 195        3PZ         0.02913   0.00568   0.02297  -0.01347  -0.02029
                          96        97        98        99       100
                           V         V         V         V         V
     Eigenvalues --     1.05989   1.09668   1.14217   1.17548   1.21863
   1 1   C  1S         -0.00069  -0.01979   0.00287  -0.02405  -0.03396
   2        2S         -0.35259  -0.30794   0.07189  -0.35217  -0.74275
   3        2PX         0.01996  -0.18668  -0.06046   0.03306   0.01963
   4        2PY         0.00307  -0.06298  -0.02619   0.07074   0.06244
   5        2PZ         0.11794  -0.22456  -0.04328  -0.11006  -0.08749
   6        3S          1.01171   0.89946  -0.33057   0.45581   1.65052
   7        3PX         0.12635   0.23900   0.09449  -0.14182   0.05360
   8        3PY        -0.04603   0.12436   0.15491   0.02807  -0.23959
   9        3PZ        -0.21458   0.60195   0.06366   0.05406  -0.16536
  10        4XX         0.00497  -0.00389  -0.01207  -0.06829   0.08047
  11        4YY         0.00446   0.01197   0.03068   0.03600  -0.19283
  12        4ZZ        -0.03504  -0.04705  -0.00533  -0.03561  -0.00113
  13        4XY        -0.01965  -0.01467  -0.00257  -0.00584   0.03177
  14        4XZ        -0.05436   0.00976   0.02885   0.06359  -0.04531
  15        4YZ         0.00423  -0.05411  -0.00605   0.00530   0.05315
  16 2   C  1S         -0.00315   0.01595  -0.00336   0.00485   0.01540
  17        2S          0.14703   0.04491  -0.15502  -0.15911   0.15426
  18        2PX         0.12665  -0.16863  -0.08105  -0.09994  -0.01324
  19        2PY        -0.00979   0.01231   0.03291   0.07951  -0.17037
  20        2PZ         0.04203  -0.08124  -0.01109   0.09861   0.06446
  21        3S         -0.55814  -0.72137   0.24211  -0.09675   0.16441
  22        3PX        -0.28244   0.58375   0.23651   0.59561   0.26247
  23        3PY         0.09632   0.32158   0.01615   0.36605   0.70015
  24        3PZ        -0.16609   0.76950  -0.05107  -0.07083   0.38447
  25        4XX        -0.02459   0.03386   0.02282   0.01200  -0.08292
  26        4YY         0.00948  -0.03129  -0.01984  -0.07286   0.04136
  27        4ZZ         0.00426   0.03365  -0.00869   0.03234   0.04701
  28        4XY        -0.00223   0.00465  -0.01766  -0.02957   0.05055
  29        4XZ        -0.00114  -0.01042  -0.01171  -0.00278   0.10711
  30        4YZ        -0.03058   0.01760   0.02189   0.07012  -0.03536
  31 3   N  1S         -0.00853  -0.02465  -0.00321   0.00502   0.00042
  32        2S         -0.05465  -0.32464  -0.06606   0.17746   0.19884
  33        2PX         0.05904   0.14952   0.03272   0.05556  -0.04847
  34        2PY        -0.01467   0.18748   0.02981   0.00983   0.03726
  35        2PZ         0.03583  -0.18760  -0.02133  -0.10412  -0.16133
  36        3S          0.42606   0.73243   0.10621  -0.28816  -0.38673
  37        3PX        -0.04036  -0.62738  -0.13306  -0.24764  -0.14525
  38        3PY        -0.05389  -0.75830  -0.09769  -0.17069  -0.38616
  39        3PZ        -0.13037   0.67069   0.03467   0.39764   0.90629
  40        4XX        -0.02789  -0.02014   0.00979   0.02808  -0.02193
  41        4YY        -0.02057  -0.08665  -0.02068   0.00937   0.04916
  42        4ZZ         0.00296  -0.07491  -0.01857   0.06071   0.05259
  43        4XY         0.00017  -0.05289  -0.02467   0.02057   0.04367
  44        4XZ         0.01277  -0.01520  -0.01079   0.00208   0.00940
  45        4YZ         0.02735  -0.00947  -0.01719   0.00287   0.06610
  46 4   O  1S          0.00271  -0.01072  -0.00506  -0.01061   0.01130
  47        2S         -0.01660  -0.28791  -0.08629  -0.13453   0.23278
  48        2PX        -0.24440   0.04515   0.05419  -0.00622  -0.02379
  49        2PY         0.09432  -0.15072  -0.04525  -0.06220  -0.01324
  50        2PZ         0.09131   0.36520   0.01586  -0.28810   0.02528
  51        3S         -0.01568   1.07802   0.24769   0.17549  -0.48261
  52        3PX         0.42514   0.04804  -0.09345   0.26023   0.16772
  53        3PY        -0.08047   0.45152   0.09234   0.53745   0.17111
  54        3PZ        -0.18712  -0.61666   0.02578   0.31632  -0.32913
  55        4XX        -0.03341  -0.15608  -0.01549   0.06663   0.04452
  56        4YY        -0.00451  -0.13897  -0.03954   0.01056   0.10518
  57        4ZZ         0.03400   0.06576  -0.01753  -0.22608   0.01192
  58        4XY        -0.00136   0.03811  -0.01131  -0.06418   0.07920
  59        4XZ        -0.00286  -0.00193  -0.00731  -0.02259   0.03950
  60        4YZ         0.00891  -0.00018  -0.00250   0.01444  -0.00617
  61 5   O  1S          0.00021   0.00243   0.00162  -0.05237  -0.02658
  62        2S         -0.02927  -0.10745   0.03513  -0.84110  -0.58200
  63        2PX        -0.01854   0.02593   0.03006  -0.06332  -0.18063
  64        2PY        -0.09418   0.09396   0.06271  -0.09394  -0.27747
  65        2PZ        -0.05234  -0.27037   0.00091   0.31430  -0.07198
  66        3S          0.09945   0.40144  -0.06380   1.94137   1.33892
  67        3PX         0.03449   0.04958  -0.06508   0.03728   0.49982
  68        3PY         0.25544  -0.05368  -0.15575   0.04913   0.76088
  69        3PZ         0.00976   0.30432   0.00546  -0.74967  -0.01453
  70        4XX        -0.00800  -0.03733   0.01548  -0.17732  -0.17921
  71        4YY        -0.00270   0.04507   0.02754  -0.29811  -0.24138
  72        4ZZ        -0.00550  -0.04323  -0.00352  -0.31067  -0.09999
  73        4XY         0.02006   0.10625   0.00876  -0.19114  -0.05597
  74        4XZ        -0.03285  -0.03164   0.00119   0.03808   0.04273
  75        4YZ         0.00256  -0.07684  -0.02202   0.04555   0.07734
  76 6   O  1S          0.00014   0.01108  -0.01938   0.01580  -0.01985
  77        2S         -0.08513   0.20525  -0.35640   0.30897  -0.44738
  78        2PX        -0.00075  -0.12257  -0.19717  -0.19972   0.15349
  79        2PY        -0.01185   0.19607   0.30371   0.31234  -0.26929
  80        2PZ         0.48813   0.01004   0.05622   0.03349  -0.03784
  81        3S          0.01753  -0.52822   1.17056  -0.76009   1.04614
  82        3PX         0.02322   0.04553   0.46027   0.19807  -0.14835
  83        3PY        -0.15533  -0.36061  -0.06446  -0.63343   0.63307
  84        3PZ        -0.77223  -0.13218   0.08817  -0.15949   0.14934
  85        4XX        -0.05670   0.04038  -0.05115   0.05261  -0.08631
  86        4YY        -0.05049   0.07054  -0.09448   0.13830  -0.18156
  87        4ZZ        -0.00002   0.06567  -0.14570   0.07835  -0.11635
  88        4XY        -0.00865  -0.00303   0.08215  -0.00893  -0.00271
  89        4XZ        -0.01028   0.01102   0.05695   0.01040   0.00026
  90        4YZ         0.03079   0.01207   0.04603   0.02713  -0.02780
  91 7   O  1S         -0.00812   0.00406  -0.00466   0.00339  -0.00058
  92        2S         -0.32456   0.28038  -0.10189   0.09272   0.06622
  93        2PX         0.34486  -0.07949  -0.22656   0.09331  -0.16276
  94        2PY         0.00444   0.28265  -0.33896   0.03442   0.10438
  95        2PZ        -0.42559  -0.14932  -0.19184  -0.04361  -0.04511
  96        3S          0.82419  -0.55528   0.72575  -0.14828  -0.13502
  97        3PX        -0.70135  -0.12094   0.91555  -0.52441   0.69884
  98        3PY        -0.11377  -0.59441   0.87393  -0.23275   0.04467
  99        3PZ         0.63875   0.09821   0.51748  -0.08763   0.22850
 100        4XX        -0.09263   0.07967  -0.02441   0.03224   0.02331
 101        4YY        -0.11871   0.09113   0.08717   0.04842   0.00233
 102        4ZZ        -0.09115   0.09590  -0.12983   0.01471   0.01961
 103        4XY        -0.01258   0.05355  -0.01959   0.02998  -0.01200
 104        4XZ        -0.00994   0.02925   0.01765   0.02751   0.00341
 105        4YZ         0.04134   0.00704   0.11651   0.01032  -0.00125
 106 8   C  1S          0.01180  -0.01329   0.02125  -0.00516   0.00570
 107        2S          0.02944  -0.18209   0.37036  -0.12611   0.11730
 108        2PX        -0.15569   0.05694   0.00512  -0.04039   0.08662
 109        2PY         0.07402  -0.07753   0.01826  -0.00550  -0.04110
 110        2PZ         0.04731   0.02487   0.02155   0.00466   0.01096
 111        3S          0.79496   0.64006  -2.25479   1.09398  -1.35763
 112        3PX         0.55726  -0.20379   0.54242  -0.00305  -0.02685
 113        3PY        -0.39356   0.60099  -1.22402   0.26297  -0.25533
 114        3PZ        -0.47568  -0.02266  -0.46424   0.05391  -0.18458
 115        4XX         0.10788  -0.04332  -0.03457   0.02410  -0.04681
 116        4YY        -0.02600   0.00629   0.05404   0.00601   0.01222
 117        4ZZ        -0.01085   0.00594  -0.01146  -0.01038  -0.00051
 118        4XY        -0.03602   0.00882   0.01140  -0.00261   0.00390
 119        4XZ        -0.01764  -0.03632  -0.00071  -0.02050  -0.01814
 120        4YZ         0.02496  -0.01395   0.04689  -0.02256   0.02832
 121 9   N  1S          0.00288   0.00462  -0.02040   0.00393  -0.00377
 122        2S          0.00566  -0.01147  -0.34005   0.01458  -0.03777
 123        2PX         0.09060  -0.04500   0.18731  -0.02211   0.02882
 124        2PY         0.19596  -0.02096   0.15865   0.03337  -0.01958
 125        2PZ         0.00616  -0.02696   0.08764   0.01320  -0.01119
 126        3S         -0.42111   0.17251   0.77076  -0.08250   0.20732
 127        3PX        -0.21879   0.14348  -0.67504   0.06464  -0.08501
 128        3PY        -0.74024   0.09317  -0.67817  -0.18329   0.10312
 129        3PZ        -0.07619   0.14006  -0.34994  -0.06123   0.07146
 130        4XX        -0.02303   0.03785  -0.06955   0.02017  -0.00063
 131        4YY         0.02565  -0.00225  -0.04196  -0.00798   0.01598
 132        4ZZ         0.00004  -0.02807  -0.06199   0.00033  -0.03466
 133        4XY         0.04963  -0.00007  -0.01897   0.01552  -0.02109
 134        4XZ         0.03053   0.00170  -0.00978  -0.00309   0.00184
 135        4YZ        -0.02554  -0.01176  -0.00245  -0.00784   0.00165
 136 10  C  1S          0.00456   0.00696  -0.05580   0.01513  -0.03245
 137        2S          0.14175   0.15886  -1.00619   0.25603  -0.50819
 138        2PX        -0.06094   0.10621  -0.13012   0.02965   0.01944
 139        2PY         0.02876  -0.02788   0.10597  -0.00847   0.02145
 140        2PZ        -0.02137  -0.00151  -0.00106   0.00573   0.00132
 141        3S         -0.34339  -0.74821   3.41005  -0.98331   1.66267
 142        3PX        -0.12578  -0.10860   0.02449  -0.02088  -0.10366
 143        3PY        -0.04479   0.19845  -0.67722   0.20874  -0.27430
 144        3PZ         0.17830   0.17535  -0.17058   0.09295  -0.06287
 145        4XX        -0.00115  -0.00265  -0.02500  -0.00793  -0.00255
 146        4YY         0.00851  -0.01953  -0.08744  -0.00241  -0.04206
 147        4ZZ         0.01238   0.03130  -0.02497   0.03773  -0.02699
 148        4XY        -0.02393  -0.01335   0.09428  -0.02416   0.03255
 149        4XZ        -0.01419   0.02154   0.01474   0.02032   0.00577
 150        4YZ         0.02636  -0.00175  -0.00750  -0.00098   0.00120
 151 11  H  1S          0.08512  -0.11243  -0.01352  -0.13925  -0.10856
 152        2S         -0.27279   0.21909   0.11429  -0.09663  -0.29022
 153        3PX        -0.02336   0.03800   0.01483   0.01953  -0.02620
 154        3PY         0.02091   0.03727   0.00736   0.00431  -0.04791
 155        3PZ         0.00855   0.01378  -0.00145  -0.00715   0.00712
 156 12  H  1S         -0.01622  -0.17506   0.03203  -0.12341  -0.15626
 157        2S         -0.12811  -0.36870  -0.13636  -0.11421  -0.15176
 158        3PX         0.00162   0.01725  -0.00202  -0.02410   0.04613
 159        3PY         0.01682   0.00624  -0.00021  -0.00786  -0.03712
 160        3PZ        -0.02063   0.02114   0.01006   0.02939   0.03171
 161 13  H  1S          0.22299  -0.14873  -0.04583  -0.20715  -0.05599
 162        2S         -0.67881   0.21877   0.20485   0.20077  -0.62135
 163        3PX         0.02297   0.02686  -0.00809  -0.03373   0.03916
 164        3PY        -0.00773   0.01497  -0.01034  -0.02167   0.04607
 165        3PZ        -0.00133   0.02025   0.00526   0.00240  -0.01568
 166 14  H  1S         -0.06671  -0.25842  -0.01940  -0.09993  -0.18427
 167        2S         -0.02822  -0.89261  -0.05463  -0.13495  -0.69258
 168        3PX        -0.01107  -0.02469   0.00451  -0.00376  -0.04155
 169        3PY        -0.00218  -0.03127   0.00551   0.00429  -0.05470
 170        3PZ        -0.01208   0.02748   0.01703  -0.00414  -0.06386
 171 15  H  1S          0.03806   0.07418  -0.03522  -0.24041   0.16556
 172        2S          0.09685  -0.09667  -0.04988  -0.29623   0.08922
 173        3PX         0.00810  -0.01576  -0.00972   0.00479   0.03977
 174        3PY         0.00588  -0.02418  -0.01246   0.01133   0.06511
 175        3PZ         0.01658   0.04364   0.00572  -0.03532  -0.03424
 176 16  H  1S          0.06306   0.03480  -0.28007   0.08715  -0.15507
 177        2S          0.08391   0.21498  -0.61394   0.18260  -0.21522
 178        3PX         0.00486  -0.01482   0.02422  -0.00509  -0.00110
 179        3PY        -0.01500   0.00842   0.01179   0.00049   0.00729
 180        3PZ         0.00157   0.01774   0.00655   0.01495   0.00140
 181 17  H  1S         -0.01351   0.01504  -0.15360   0.04956  -0.11260
 182        2S          0.21928   0.06054  -0.25541   0.06914  -0.13634
 183        3PX        -0.00212  -0.02626   0.05995  -0.02169   0.01109
 184        3PY        -0.00256  -0.01111  -0.00336  -0.00841  -0.00135
 185        3PZ         0.00478  -0.01133  -0.01298  -0.00655  -0.00492
 186 18  H  1S          0.03566  -0.00503  -0.14072   0.03676  -0.11134
 187        2S         -0.07826  -0.03641  -0.34433   0.06410  -0.19867
 188        3PX         0.00547  -0.00295   0.03875   0.00338   0.00301
 189        3PY         0.01746  -0.00287  -0.01929   0.00077  -0.00677
 190        3PZ        -0.00839   0.00133   0.02279   0.00002   0.00482
 191 19  H  1S          0.06492   0.12735  -0.22097   0.09904  -0.08682
 192        2S         -0.60303  -0.01188  -0.99649  -0.25226   0.11544
 193        3PX        -0.01945  -0.01611  -0.07443  -0.02358   0.00159
 194        3PY        -0.02658   0.01020   0.00374   0.00241   0.00738
 195        3PZ        -0.02074   0.01070  -0.00579   0.00365   0.00545
                         101       102       103       104       105
                           V         V         V         V         V
     Eigenvalues --     1.26358   1.26663   1.28463   1.28943   1.33281
   1 1   C  1S          0.00397  -0.00278  -0.01237  -0.01898   0.00037
   2        2S         -0.00615  -0.04915  -0.21877  -0.37021   0.01523
   3        2PX        -0.03841   0.04167  -0.09828  -0.09347   0.01771
   4        2PY         0.11700  -0.06482  -0.03729  -0.05241  -0.01802
   5        2PZ        -0.02927  -0.04332  -0.01007   0.03346   0.00751
   6        3S         -0.61459   0.15490   1.28422   1.92943  -0.01343
   7        3PX         0.22001  -0.13849   0.11469   0.09854  -0.10725
   8        3PY        -0.10033   0.14563  -0.20925  -0.28951   0.09329
   9        3PZ        -0.33802   0.12120   0.37051   0.34215   0.00778
  10        4XX        -0.32204   0.13684  -0.13395  -0.17745  -0.03917
  11        4YY         0.32236  -0.16282   0.05657   0.04573   0.05869
  12        4ZZ        -0.01943   0.02020   0.06970   0.11146  -0.01663
  13        4XY        -0.14459   0.07241  -0.01405  -0.01251  -0.01734
  14        4XZ         0.14062  -0.04312   0.03579   0.02642   0.06184
  15        4YZ        -0.05465   0.03640  -0.02349  -0.00453  -0.05203
  16 2   C  1S         -0.00195   0.00394   0.00770   0.00986  -0.00039
  17        2S         -0.08183   0.05039   0.20552   0.25066   0.02230
  18        2PX         0.04919  -0.03842   0.10047   0.12979   0.03335
  19        2PY        -0.13759   0.01605  -0.02857  -0.03952  -0.01834
  20        2PZ         0.05368  -0.02268  -0.06909  -0.10288   0.00663
  21        3S          1.05794  -0.19001  -1.04018  -1.33846  -0.13505
  22        3PX        -0.14273   0.19396  -0.18122  -0.25922  -0.06543
  23        3PY         0.41023  -0.01610   0.14031   0.12965   0.01876
  24        3PZ        -0.58416   0.11327   1.09101   1.33382  -0.05521
  25        4XX         0.11472  -0.04811   0.00017  -0.02240   0.39877
  26        4YY        -0.10621   0.04677  -0.06438  -0.04361  -0.39452
  27        4ZZ         0.00901   0.00116   0.03421   0.02924  -0.00595
  28        4XY         0.07735  -0.01350   0.04849   0.05762   0.16365
  29        4XZ        -0.26782   0.12875  -0.11108  -0.12092   0.16741
  30        4YZ         0.21540  -0.08878   0.03515   0.02465  -0.12870
  31 3   N  1S         -0.00615  -0.00152   0.01273   0.01407  -0.00230
  32        2S         -0.01634   0.02647   0.22592   0.25386  -0.06194
  33        2PX         0.01454   0.00104   0.02385   0.01345  -0.08880
  34        2PY        -0.04443   0.02498   0.02879   0.04357   0.06610
  35        2PZ        -0.06056  -0.02855  -0.00748  -0.01462   0.01967
  36        3S          0.32936  -0.03509  -0.98217  -1.13550   0.18452
  37        3PX         0.02997  -0.11687   0.16414   0.22557   0.06451
  38        3PY        -0.26210  -0.02181   0.05900   0.08052  -0.06630
  39        3PZ         0.34353   0.08246   0.06805   0.03017  -0.07897
  40        4XX         0.06081  -0.02374   0.03452   0.03015   0.15073
  41        4YY        -0.06623   0.02179   0.01136   0.02816  -0.17106
  42        4ZZ        -0.01688   0.00819   0.05948   0.06150  -0.00543
  43        4XY         0.02628  -0.01001   0.04945   0.05539   0.06925
  44        4XZ         0.16909  -0.07251   0.05055   0.06193  -0.22422
  45        4YZ        -0.07582   0.05244  -0.05267  -0.06159   0.15157
  46 4   O  1S          0.01258  -0.00537  -0.01399  -0.01821   0.00195
  47        2S          0.31979  -0.04127  -0.32582  -0.41576   0.02993
  48        2PX         0.06468   0.04719  -0.10464  -0.11548  -0.01083
  49        2PY         0.08981  -0.04618  -0.13255  -0.15202   0.00726
  50        2PZ         0.01193  -0.00927   0.01508   0.00889   0.01007
  51        3S         -0.72858   0.19718   0.82084   1.06728  -0.08265
  52        3PX        -0.22302  -0.07039   0.46322   0.51393   0.14857
  53        3PY        -0.46278   0.12369   0.54890   0.61226  -0.06197
  54        3PZ         0.02847   0.01525  -0.21007  -0.20175  -0.04108
  55        4XX         0.05826  -0.00519  -0.10976  -0.13468  -0.37572
  56        4YY         0.12745  -0.02741  -0.11522  -0.15837   0.39264
  57        4ZZ         0.06193  -0.01780  -0.04718  -0.05208   0.00662
  58        4XY         0.06930   0.00625  -0.05791  -0.06579  -0.15074
  59        4XZ        -0.10420   0.04831  -0.03084  -0.01957  -0.00748
  60        4YZ         0.07163  -0.02584   0.04181   0.04212   0.01863
  61 5   O  1S          0.01128  -0.00018  -0.01827  -0.01807  -0.00339
  62        2S          0.03248  -0.01030  -0.16993  -0.13928  -0.04253
  63        2PX        -0.15488   0.00065   0.05566   0.08115   0.00576
  64        2PY        -0.14273  -0.01140   0.10203   0.13652   0.00936
  65        2PZ        -0.16434  -0.00731   0.12920   0.15399   0.01523
  66        3S         -0.25263   0.01486   0.60333   0.55154   0.13268
  67        3PX         0.39894   0.01560  -0.19007  -0.26902  -0.09127
  68        3PY         0.45251   0.00699  -0.27396  -0.38424   0.04551
  69        3PZ         0.48622   0.01346  -0.50794  -0.57133  -0.05666
  70        4XX        -0.11985   0.01609  -0.00771   0.01553   0.02088
  71        4YY         0.01382  -0.01561   0.03791   0.06526  -0.05913
  72        4ZZ         0.13373  -0.00965  -0.17865  -0.20383   0.00311
  73        4XY        -0.00367   0.00945  -0.04250  -0.03667   0.01542
  74        4XZ         0.07166   0.00950  -0.06489  -0.07813  -0.19928
  75        4YZ         0.07434  -0.00560  -0.06759  -0.08656   0.13433
  76 6   O  1S          0.00997   0.03611  -0.00529  -0.00159  -0.00040
  77        2S          0.17623   0.66272  -0.12709  -0.09497  -0.00525
  78        2PX         0.18709   0.44029   0.12683   0.25669   0.01869
  79        2PY         0.02488   0.10925  -0.10255  -0.21132  -0.01809
  80        2PZ         0.01011   0.08055  -0.07156   0.05462  -0.01010
  81        3S         -0.37190  -1.39331   0.25380   0.18556   0.01471
  82        3PX        -0.31822  -0.77664  -0.20298  -0.42592  -0.03061
  83        3PY        -0.06805  -0.29524   0.19938   0.37319   0.03440
  84        3PZ        -0.03766  -0.19244   0.10799  -0.05637   0.01903
  85        4XX         0.09512   0.32191  -0.01999   0.01642   0.00315
  86        4YY         0.05038   0.19757  -0.06435  -0.08263  -0.01383
  87        4ZZ         0.02065   0.10786  -0.02886  -0.00500   0.00477
  88        4XY         0.04009   0.11307   0.03124   0.03016   0.00485
  89        4XZ         0.03221   0.08749  -0.03343   0.03690   0.00384
  90        4YZ         0.01934   0.06842  -0.03197  -0.02128  -0.00183
  91 7   O  1S         -0.00234  -0.00564  -0.00782  -0.00924  -0.00058
  92        2S         -0.03722  -0.05059  -0.10000  -0.14302   0.00180
  93        2PX        -0.00808  -0.01957  -0.05775  -0.07854  -0.00953
  94        2PY        -0.08155  -0.22159   0.06725   0.01255  -0.00563
  95        2PZ        -0.01803  -0.09723  -0.03282  -0.01514   0.01883
  96        3S          0.13499   0.29948   0.27555   0.39335   0.00098
  97        3PX         0.01479  -0.03991   0.26508   0.40078   0.02413
  98        3PY         0.05100   0.07426  -0.12209   0.01353   0.01705
  99        3PZ        -0.00444   0.03436   0.14617   0.02853  -0.01858
 100        4XX        -0.03289  -0.07763  -0.03404  -0.07679  -0.00259
 101        4YY         0.04567   0.13943  -0.10409   0.02602   0.00485
 102        4ZZ        -0.02823  -0.05725   0.04717  -0.06239  -0.00783
 103        4XY        -0.00533  -0.01352  -0.00525  -0.02406   0.00957
 104        4XZ        -0.00211  -0.00029  -0.04067   0.03641  -0.02028
 105        4YZ         0.03557   0.12459   0.06042  -0.04908   0.00069
 106 8   C  1S         -0.00221  -0.00884  -0.00068   0.00428   0.00101
 107        2S          0.03373   0.06639   0.00675   0.10831   0.02190
 108        2PX         0.05500   0.15158   0.02200   0.09131   0.00030
 109        2PY         0.02809   0.07042  -0.03228   0.05321   0.00489
 110        2PZ         0.02228   0.06545   0.09118  -0.03634  -0.00301
 111        3S         -0.52012  -1.31936  -0.46947  -1.21851  -0.13827
 112        3PX        -0.33569  -0.95618   0.10785  -0.23470  -0.03875
 113        3PY         0.08863   0.44923   0.13419  -0.27772  -0.04047
 114        3PZ        -0.01530  -0.02029  -0.29205   0.07257   0.00474
 115        4XX        -0.01516  -0.04632  -0.04053  -0.00953  -0.00359
 116        4YY        -0.00457  -0.03655  -0.20370   0.15467   0.01268
 117        4ZZ         0.01719   0.07598   0.22446  -0.16668  -0.00678
 118        4XY         0.03198   0.09300  -0.07105   0.09226  -0.00711
 119        4XZ         0.01199   0.02563   0.06046  -0.07269   0.02677
 120        4YZ        -0.00563   0.00894   0.24870  -0.17017  -0.01355
 121 9   N  1S         -0.00845  -0.02600  -0.00317  -0.00551  -0.00060
 122        2S         -0.19899  -0.59929  -0.02782  -0.08729  -0.00674
 123        2PX         0.03438   0.09184   0.00874   0.03324   0.00498
 124        2PY        -0.05781  -0.17556  -0.01910  -0.03392  -0.00219
 125        2PZ        -0.01702  -0.05160   0.02846  -0.03741  -0.00691
 126        3S          0.58500   1.80426   0.13167   0.29644   0.02778
 127        3PX        -0.07402  -0.23646  -0.08634  -0.03257  -0.00342
 128        3PY         0.35677   1.04419   0.04483   0.36791   0.03346
 129        3PZ         0.12956   0.40739   0.18845   0.03490   0.00374
 130        4XX        -0.04036  -0.12359  -0.04645   0.00375  -0.00145
 131        4YY        -0.04582  -0.12834   0.08023  -0.05895  -0.01536
 132        4ZZ        -0.00501  -0.02345  -0.05038   0.01447   0.01265
 133        4XY         0.00111  -0.00148  -0.03362   0.02498  -0.00359
 134        4XZ        -0.00637  -0.00789   0.12775  -0.09973  -0.00255
 135        4YZ        -0.01944  -0.07908  -0.09943   0.05847   0.01688
 136 10  C  1S          0.00919   0.03229  -0.00294  -0.01105  -0.00262
 137        2S          0.15568   0.53474  -0.04066  -0.15211  -0.03766
 138        2PX        -0.03859  -0.09631   0.01282  -0.03662  -0.00218
 139        2PY        -0.02301  -0.06314   0.03158  -0.02992   0.00021
 140        2PZ        -0.02125  -0.06769  -0.09502   0.05375   0.00414
 141        3S         -0.19347  -0.91110   0.16829   0.80203   0.14718
 142        3PX         0.10399   0.30777  -0.04389   0.01604  -0.00188
 143        3PY        -0.11812  -0.28456  -0.13776  -0.20925  -0.02925
 144        3PZ        -0.01129   0.02909   0.23019  -0.23209  -0.03526
 145        4XX         0.01438   0.05668   0.12100  -0.08499  -0.00222
 146        4YY         0.00784   0.02696   0.11763  -0.08849   0.00049
 147        4ZZ         0.01164   0.02330  -0.23901   0.16507  -0.00249
 148        4XY         0.02979   0.09921   0.13509  -0.08673  -0.00045
 149        4XZ         0.00535  -0.01517  -0.32873   0.26457   0.00654
 150        4YZ         0.00147  -0.00465  -0.09086   0.09605   0.00077
 151 11  H  1S         -0.04652   0.00689  -0.03649  -0.03281  -0.02413
 152        2S          0.08195  -0.08498   0.07265  -0.03413  -0.09465
 153        3PX         0.06976  -0.03203   0.04742   0.05330   0.01021
 154        3PY         0.08015  -0.04674   0.03784   0.03962   0.02927
 155        3PZ        -0.02535   0.00796  -0.03816  -0.05872   0.00564
 156 12  H  1S          0.05161   0.02006  -0.08354  -0.09479   0.00002
 157        2S          0.08570  -0.13593  -0.19666  -0.25479  -0.00386
 158        3PX        -0.11044   0.04900  -0.02626  -0.03773  -0.03436
 159        3PY         0.07707  -0.03970   0.01700   0.02423   0.02786
 160        3PZ        -0.00216   0.01184   0.04717   0.06011  -0.00694
 161 13  H  1S          0.03836  -0.07325   0.01644   0.07250   0.03251
 162        2S         -0.20723   0.22365  -0.18832  -0.46225   0.09944
 163        3PX        -0.08143   0.02551  -0.00690  -0.01414  -0.01690
 164        3PY        -0.12519   0.05471   0.00031   0.00365  -0.02205
 165        3PZ         0.04160  -0.02679  -0.02062  -0.03192   0.00443
 166 14  H  1S         -0.05375  -0.02754   0.01779   0.02476  -0.00131
 167        2S         -0.47504  -0.05253   0.32590   0.43122  -0.00414
 168        3PX        -0.00121  -0.01827   0.03448   0.04773  -0.11696
 169        3PY        -0.06647   0.01022   0.02602   0.02928   0.07928
 170        3PZ        -0.04919   0.00107   0.03389   0.04152   0.00264
 171 15  H  1S          0.26605   0.00685  -0.21372  -0.25862  -0.02465
 172        2S          0.21870   0.00114  -0.17875  -0.21540  -0.02281
 173        3PX         0.06653  -0.00951  -0.01718  -0.02604   0.01343
 174        3PY         0.03969   0.00669  -0.05896  -0.07225  -0.01116
 175        3PZ        -0.04693   0.00385   0.05374   0.06801  -0.00373
 176 16  H  1S          0.02849   0.10441  -0.02383  -0.06194  -0.01082
 177        2S         -0.02285  -0.01262  -0.03213  -0.12658  -0.02121
 178        3PX         0.00595   0.01849   0.02385  -0.01882   0.00000
 179        3PY         0.01466   0.04995   0.03145  -0.02923  -0.00025
 180        3PZ         0.00437   0.00295  -0.13465   0.10467  -0.00018
 181 17  H  1S          0.04222   0.13104  -0.04875  -0.00121  -0.00987
 182        2S          0.09396   0.32780   0.15061  -0.08885  -0.01995
 183        3PX         0.01349   0.04653   0.11854  -0.08034   0.00001
 184        3PY         0.00033   0.00214   0.04518  -0.02631   0.00026
 185        3PZ        -0.00421  -0.01114   0.05771  -0.03985  -0.00029
 186 18  H  1S          0.04220   0.14117   0.02773  -0.05838  -0.00731
 187        2S          0.08112   0.23644  -0.15476   0.06569   0.00440
 188        3PX         0.00595   0.00336  -0.12689   0.10799   0.00173
 189        3PY        -0.00810  -0.02917  -0.02973   0.02959   0.00124
 190        3PZ         0.00738   0.01741  -0.03696   0.03343   0.00042
 191 19  H  1S         -0.01633  -0.04762  -0.03477  -0.06402  -0.00982
 192        2S          0.15482   0.43304   0.12069   0.30150   0.02945
 193        3PX         0.01824   0.04812   0.01626   0.03175   0.00371
 194        3PY        -0.01194  -0.03297  -0.01145  -0.01166   0.00152
 195        3PZ        -0.00181  -0.00331   0.00691  -0.00270  -0.00639
                         106       107       108       109       110
                           V         V         V         V         V
     Eigenvalues --     1.35076   1.37137   1.39911   1.47658   1.48605
   1 1   C  1S         -0.01789  -0.01081  -0.00483  -0.03215  -0.09417
   2        2S         -0.05474  -0.13925  -0.03491  -0.46626  -1.32284
   3        2PX        -0.00903   0.03849   0.00756   0.08429   0.06115
   4        2PY        -0.00361   0.00033  -0.00837   0.01140   0.11569
   5        2PZ         0.10805   0.03343   0.03834  -0.02618  -0.06508
   6        3S          0.50464   0.51765   0.47217   1.49635   4.49456
   7        3PX         0.06424  -0.10108  -0.06296  -0.30700  -0.40410
   8        3PY        -0.04951  -0.03741  -0.13721  -0.10995  -0.67801
   9        3PZ         0.14599   0.02663   0.08020   0.27068   0.85386
  10        4XX         0.09569  -0.03374  -0.00262   0.07114  -0.09292
  11        4YY         0.12698   0.00570   0.03293  -0.11666  -0.01489
  12        4ZZ        -0.23028   0.00605  -0.03628  -0.00985  -0.04530
  13        4XY         0.00137  -0.00121  -0.00140   0.04287  -0.01008
  14        4XZ        -0.09433  -0.00018  -0.03117  -0.07978   0.00190
  15        4YZ        -0.09929   0.01110  -0.03300   0.02919  -0.07242
  16 2   C  1S          0.00050   0.00260   0.00075   0.01091   0.03101
  17        2S          0.31859   0.01389   0.10930   0.10714   0.31937
  18        2PX         0.08019   0.00747   0.06668  -0.00044   0.12296
  19        2PY         0.01296   0.02235  -0.01424   0.08472   0.13172
  20        2PZ         0.10875  -0.00791  -0.00256  -0.03720  -0.10338
  21        3S         -2.51632  -0.20467  -0.22138  -0.86909  -2.23742
  22        3PX        -0.39547  -0.14617  -0.26168  -0.24059  -0.97444
  23        3PY        -0.34230  -0.24375  -0.16703  -0.49585  -1.37728
  24        3PZ        -1.05200  -0.00942   0.39707   0.10089   0.76744
  25        4XX         0.00315   0.02467  -0.02013   0.04236  -0.01306
  26        4YY         0.04015  -0.00041  -0.00450  -0.02367   0.05927
  27        4ZZ        -0.04740  -0.01673   0.01604  -0.01388  -0.03245
  28        4XY        -0.00834   0.00653   0.01516   0.04852   0.08579
  29        4XZ        -0.02138   0.02308  -0.02772   0.00549  -0.04577
  30        4YZ         0.02828  -0.00971   0.00452  -0.02823  -0.01783
  31 3   N  1S         -0.04848  -0.00146   0.00615  -0.00387  -0.00292
  32        2S         -1.09233  -0.05291   0.02631  -0.02996  -0.01413
  33        2PX         0.04339  -0.01794   0.00227  -0.02238   0.06008
  34        2PY         0.05710   0.00771  -0.00065   0.03886   0.03323
  35        2PZ         0.27553   0.00712   0.05629  -0.01263  -0.01852
  36        3S          3.42972   0.16563  -0.31390   0.24443   0.17566
  37        3PX        -0.23503   0.05002   0.12699   0.10806   0.17576
  38        3PY        -0.38478   0.05411   0.12027   0.04927   0.33793
  39        3PZ        -1.31444  -0.11513  -0.07401  -0.19789  -0.41617
  40        4XX        -0.10005   0.00019  -0.00325   0.10963  -0.05230
  41        4YY        -0.17765   0.00052   0.01283  -0.09982   0.10447
  42        4ZZ        -0.19317  -0.01720   0.00537  -0.02216  -0.05329
  43        4XY        -0.14427  -0.00066   0.01384   0.09721   0.09567
  44        4XZ         0.01596  -0.01499   0.02630  -0.06364   0.08545
  45        4YZ        -0.03939   0.01350  -0.01959   0.08026   0.03458
  46 4   O  1S          0.03363   0.00197   0.00935  -0.00583  -0.00309
  47        2S          0.51115   0.04081   0.10147  -0.04183   0.05443
  48        2PX         0.05510   0.02814  -0.02510   0.05740   0.16147
  49        2PY         0.07034   0.03460   0.02216   0.09537   0.23577
  50        2PZ         0.09004  -0.02553   0.03177  -0.11045  -0.24727
  51        3S         -1.34208  -0.10676  -0.33565   0.19296   0.01132
  52        3PX         0.14197  -0.10974   0.09135  -0.12546  -0.57172
  53        3PY         0.19888  -0.15259   0.01547  -0.38294  -0.76805
  54        3PZ        -0.38409   0.10259  -0.18434   0.36949   0.73456
  55        4XX         0.10541  -0.01044  -0.00488   0.05026  -0.06822
  56        4YY         0.16136   0.04264   0.03378  -0.10384   0.06307
  57        4ZZ         0.16388   0.00506   0.06352   0.02028   0.04701
  58        4XY         0.15826   0.00510   0.01503   0.06836   0.06932
  59        4XZ        -0.01269   0.01118  -0.00111  -0.35899   0.17445
  60        4YZ         0.00981  -0.01574   0.00791   0.26428  -0.07783
  61 5   O  1S         -0.04354   0.00689  -0.00710   0.01569   0.03381
  62        2S         -0.55687   0.10171  -0.05871   0.22562   0.51311
  63        2PX         0.09470   0.01840   0.02735   0.04683   0.08719
  64        2PY         0.13434   0.01914   0.03856   0.03442   0.14198
  65        2PZ         0.20821   0.00007   0.04160   0.01804   0.06682
  66        3S          1.70486  -0.29091   0.24912  -0.71067  -1.56145
  67        3PX        -0.17355  -0.06376  -0.06890  -0.20348  -0.41557
  68        3PY        -0.23032  -0.07847  -0.06709  -0.21913  -0.65920
  69        3PZ        -0.76934   0.08229  -0.19386   0.18610   0.32470
  70        4XX        -0.15564   0.02991  -0.00815  -0.39961   0.27451
  71        4YY        -0.16722   0.00527  -0.00096   0.51743  -0.02433
  72        4ZZ        -0.13186   0.04917  -0.04127   0.05573   0.14066
  73        4XY        -0.10966   0.02094  -0.01474  -0.13868   0.19914
  74        4XZ        -0.00954  -0.00678  -0.03801   0.08765  -0.03751
  75        4YZ        -0.03260   0.01379  -0.01135  -0.03710   0.00692
  76 6   O  1S         -0.00018  -0.00092  -0.02653   0.00851   0.01446
  77        2S         -0.05386  -0.01617  -0.40943   0.15452   0.24801
  78        2PX         0.13050  -0.00582  -0.06186   0.02695   0.06614
  79        2PY        -0.07057   0.00239  -0.08258   0.00635   0.02366
  80        2PZ        -0.03488  -0.01264  -0.03186   0.01973   0.01242
  81        3S          0.06582   0.03578   1.03984  -0.37123  -0.62417
  82        3PX        -0.23531   0.00970   0.39389  -0.09635  -0.21161
  83        3PY         0.11155  -0.03595   0.25540  -0.07061  -0.14068
  84        3PZ         0.04916   0.10191   0.14425  -0.06072  -0.11108
  85        4XX         0.00257  -0.00261  -0.21855   0.06380   0.09776
  86        4YY        -0.04876   0.11774  -0.03048   0.05709   0.05932
  87        4ZZ         0.00368  -0.12959  -0.11725   0.00335   0.04131
  88        4XY         0.03333   0.02917  -0.12129  -0.00912  -0.01666
  89        4XZ         0.02417  -0.02767  -0.07059   0.00184   0.04413
  90        4YZ        -0.03484  -0.13224   0.03431   0.02560   0.06209
  91 7   O  1S         -0.01191   0.00253   0.04556   0.00840   0.00745
  92        2S         -0.17735   0.03295   0.82582   0.15879   0.18294
  93        2PX        -0.05424   0.02139   0.30366   0.07343   0.10175
  94        2PY         0.00987  -0.01169  -0.02277   0.00706   0.05148
  95        2PZ         0.01060   0.01959   0.04242   0.01672  -0.02332
  96        3S          0.49407  -0.10348  -2.28769  -0.41601  -0.42943
  97        3PX         0.21216  -0.03989  -0.62980  -0.30302  -0.42112
  98        3PY        -0.02975   0.08627   0.14208   0.00726  -0.10424
  99        3PZ        -0.00448  -0.16927  -0.03792  -0.04191   0.00702
 100        4XX        -0.09048  -0.08370   0.40096   0.06694   0.07921
 101        4YY        -0.03701  -0.00902   0.14042   0.04307   0.07873
 102        4ZZ        -0.03401   0.11874   0.10641   0.01028  -0.02670
 103        4XY        -0.00247  -0.16525   0.01089   0.00390   0.02713
 104        4XZ        -0.01018   0.39568   0.04055   0.01345  -0.01855
 105        4YZ        -0.01455  -0.01137   0.02416   0.03270   0.02517
 106 8   C  1S          0.00218   0.00051  -0.00318   0.00688   0.01063
 107        2S          0.05267   0.00683   0.11961   0.03872   0.06386
 108        2PX         0.01170  -0.00625  -0.00831   0.02068   0.03707
 109        2PY         0.02463   0.00171  -0.14957   0.03215   0.04621
 110        2PZ         0.01343  -0.01183  -0.06516   0.01465   0.04366
 111        3S         -0.57737   0.06004  -0.61066   0.18594   0.06355
 112        3PX         0.03486  -0.02170  -0.79688  -0.35120  -0.51260
 113        3PY        -0.08743  -0.02004   1.49136  -0.60551  -0.79864
 114        3PZ        -0.03132   0.02102   0.49504  -0.28500  -0.46947
 115        4XX        -0.00642   0.12615   0.03221   0.01997   0.01430
 116        4YY         0.00375  -0.12030  -0.03118   0.00269   0.00707
 117        4ZZ        -0.00299  -0.00140   0.03159  -0.00862  -0.00169
 118        4XY         0.00948   0.16206  -0.02162  -0.01479  -0.02898
 119        4XZ         0.00778  -0.46997   0.00409   0.00633   0.04852
 120        4YZ         0.00363   0.16641  -0.04809   0.01134   0.01660
 121 9   N  1S         -0.00313   0.00036  -0.03795   0.01258   0.01567
 122        2S         -0.01631  -0.00584  -0.91278   0.18747   0.24213
 123        2PX         0.01315  -0.01827   0.04908   0.00733   0.01706
 124        2PY         0.00170  -0.05001  -0.21566   0.00763   0.01673
 125        2PZ         0.00436   0.11077  -0.08571   0.00313   0.00013
 126        3S          0.08963  -0.00398   3.05990  -0.75814  -0.95434
 127        3PX        -0.05370   0.01913  -0.58863   0.27170   0.34778
 128        3PY         0.10603   0.01980   0.81140  -0.13323  -0.15410
 129        3PZ         0.03053  -0.05742   0.24105  -0.01202   0.02441
 130        4XX        -0.01332   0.01716  -0.18658   0.07642   0.10479
 131        4YY         0.00099   0.20658  -0.17333   0.00753  -0.00688
 132        4ZZ         0.00045  -0.22501  -0.01489  -0.00494   0.00251
 133        4XY         0.00436   0.07085  -0.01717  -0.01774  -0.03736
 134        4XZ        -0.00171  -0.04753  -0.03506   0.01412   0.03904
 135        4YZ         0.00370  -0.24913  -0.07018   0.00862   0.01905
 136 10  C  1S         -0.00291  -0.00056   0.00043  -0.02165  -0.03271
 137        2S         -0.04424  -0.00059   0.10093  -0.29764  -0.45828
 138        2PX        -0.02117   0.01549   0.10079   0.02160   0.03494
 139        2PY         0.00384   0.00750  -0.06282   0.00961   0.02164
 140        2PZ        -0.00532  -0.03223  -0.00515   0.00949   0.00956
 141        3S          0.26393   0.00134  -0.65757   1.10740   1.67803
 142        3PX         0.01521  -0.07090   0.00533  -0.19469  -0.28726
 143        3PY        -0.11685  -0.03321   0.27989  -0.16872  -0.28640
 144        3PZ        -0.03105   0.15420   0.08735  -0.11002  -0.13614
 145        4XX        -0.00144  -0.01001   0.08769  -0.02143  -0.02724
 146        4YY         0.02494  -0.04536  -0.21771  -0.00978   0.00022
 147        4ZZ        -0.02180   0.05336   0.12679  -0.00784  -0.03051
 148        4XY        -0.01014  -0.00852   0.18864   0.00955   0.01952
 149        4XZ        -0.00057   0.00826   0.03322  -0.00068  -0.01245
 150        4YZ         0.01585   0.04530  -0.12691  -0.00060  -0.00558
 151 11  H  1S         -0.05169  -0.01249  -0.00167  -0.12685  -0.34233
 152        2S          0.02042  -0.13340  -0.04011  -0.22244  -0.42498
 153        3PX        -0.04709  -0.00375  -0.00580  -0.06003  -0.01160
 154        3PY         0.03484  -0.00122   0.01342  -0.04399  -0.02580
 155        3PZ         0.08571  -0.00574   0.00993   0.04081   0.01200
 156 12  H  1S         -0.06600  -0.01895  -0.01206  -0.08151  -0.24829
 157        2S         -0.01670  -0.02260   0.03033  -0.09559  -0.29804
 158        3PX         0.01551  -0.01578  -0.00203   0.01780   0.00123
 159        3PY         0.03605   0.00928   0.01644  -0.00726   0.01733
 160        3PZ        -0.14990  -0.00737  -0.03203  -0.02764  -0.06953
 161 13  H  1S         -0.02893  -0.01812   0.00809  -0.11054  -0.36087
 162        2S         -0.12279  -0.08039  -0.09276  -0.08518  -0.40613
 163        3PX         0.05004  -0.02057   0.01329   0.00111  -0.02370
 164        3PY        -0.03707  -0.00677  -0.00088   0.04048  -0.05778
 165        3PZ         0.08734  -0.00374   0.01156  -0.02877   0.02881
 166 14  H  1S         -0.13728   0.01752   0.04052   0.00420   0.03422
 167        2S         -0.11429   0.04110   0.14547   0.13112   0.37721
 168        3PX         0.01737  -0.00388   0.01406  -0.08937   0.02921
 169        3PY        -0.00186   0.00018   0.00221   0.05443  -0.03137
 170        3PZ         0.02071  -0.00268   0.00552  -0.01055  -0.02897
 171 15  H  1S         -0.36439   0.00359  -0.07769  -0.01292  -0.08171
 172        2S         -0.32714   0.00280  -0.06341  -0.01647  -0.08038
 173        3PX        -0.00146  -0.00483  -0.00037   0.19611  -0.09110
 174        3PY        -0.01984   0.00576  -0.01657  -0.14105   0.04922
 175        3PZ        -0.04978  -0.00901   0.00781  -0.01011  -0.00540
 176 16  H  1S         -0.02431   0.00581   0.04381  -0.04865  -0.07786
 177        2S         -0.06074   0.03000   0.15402  -0.05409  -0.09160
 178        3PX        -0.00086  -0.00585   0.01316   0.00148   0.00240
 179        3PY        -0.01627  -0.00423   0.17843   0.01020   0.01371
 180        3PZ        -0.00627   0.03427   0.05743   0.00178  -0.00225
 181 17  H  1S         -0.00270   0.01978  -0.03016  -0.08444  -0.12784
 182        2S          0.01306   0.09683  -0.03100  -0.11670  -0.15725
 183        3PX         0.00503  -0.02199   0.00317  -0.00777  -0.00626
 184        3PY         0.01047  -0.00154  -0.07785  -0.00479  -0.00379
 185        3PZ         0.01174   0.00114  -0.10145  -0.00269   0.00038
 186 18  H  1S         -0.00537  -0.03207  -0.03284  -0.07886  -0.11721
 187        2S          0.01067  -0.12155  -0.02376  -0.11025  -0.17280
 188        3PX         0.00468   0.01500  -0.03722  -0.00618  -0.01544
 189        3PY         0.01242  -0.00978  -0.13691  -0.00132  -0.00085
 190        3PZ        -0.00031   0.00934   0.02488  -0.00359  -0.00663
 191 19  H  1S         -0.03771   0.00594  -0.06008   0.03284   0.03472
 192        2S          0.13020  -0.01576  -0.37390   0.09407   0.15642
 193        3PX         0.02224  -0.02155  -0.05462  -0.01168  -0.01209
 194        3PY        -0.01380  -0.04794   0.02466   0.01989   0.03121
 195        3PZ        -0.00094   0.12453  -0.00637   0.00248  -0.00714
                         111       112       113       114       115
                           V         V         V         V         V
     Eigenvalues --     1.49595   1.55038   1.57227   1.58404   1.60013
   1 1   C  1S          0.05041   0.01131  -0.00488   0.00625   0.03466
   2        2S          0.74012   0.07917   0.01051   0.03167   0.16443
   3        2PX         0.00238   0.03784  -0.00490  -0.00015   0.08260
   4        2PY        -0.06257   0.04357  -0.00870   0.02807   0.07786
   5        2PZ         0.04164  -0.03244   0.00852  -0.04160  -0.11464
   6        3S         -2.30932  -1.08531   0.25556  -0.62327  -2.63196
   7        3PX         0.09590   0.15141  -0.11090   0.17461   0.45234
   8        3PY         0.26562   0.24058  -0.09967   0.16297   0.71608
   9        3PZ        -0.39587  -0.23821   0.10934  -0.06885  -0.60105
  10        4XX         0.02485  -0.02751   0.03684  -0.07429  -0.04816
  11        4YY         0.06594  -0.00208   0.00405   0.02583  -0.08022
  12        4ZZ        -0.01668   0.03931  -0.04438   0.05319   0.15130
  13        4XY         0.00468   0.00775  -0.00279  -0.00766   0.06384
  14        4XZ        -0.01064   0.02019  -0.00355   0.04846   0.00473
  15        4YZ        -0.01144   0.04532  -0.01659   0.00833   0.07668
  16 2   C  1S         -0.01541  -0.00066   0.00153   0.00040  -0.00611
  17        2S         -0.07069  -0.03391   0.01540   0.00644   0.00558
  18        2PX         0.00151  -0.01704  -0.00525  -0.00124   0.03874
  19        2PY        -0.08931   0.02830   0.01782   0.01478  -0.08473
  20        2PZ         0.03960   0.03493  -0.01586   0.02970   0.10137
  21        3S          1.05216  -1.07344   0.23151  -0.80344  -2.49075
  22        3PX         0.36995   0.38205  -0.08073   0.27708   0.76838
  23        3PY         0.67800   0.53555  -0.15144   0.23467   1.44406
  24        3PZ        -0.19966  -1.72925   0.57511  -1.12856  -4.29060
  25        4XX        -0.03404   0.01281   0.02511  -0.07290  -0.03654
  26        4YY        -0.02438   0.02347  -0.03555   0.09337   0.06791
  27        4ZZ         0.03863  -0.04013   0.01688  -0.02854  -0.08410
  28        4XY        -0.03785  -0.01299  -0.00969  -0.02519   0.10092
  29        4XZ        -0.00315   0.00391  -0.00642   0.06994  -0.13316
  30        4YZ         0.00307  -0.02809   0.03777  -0.08166  -0.06255
  31 3   N  1S          0.00465  -0.03410   0.01037  -0.02289  -0.08348
  32        2S          0.04693  -0.42728   0.12758  -0.29112  -1.02373
  33        2PX        -0.00567  -0.00095   0.01630  -0.03522   0.03425
  34        2PY        -0.02685  -0.00245  -0.01359   0.03942  -0.00880
  35        2PZ         0.03726  -0.03669   0.01435  -0.02233  -0.07807
  36        3S         -0.29907   2.27706  -0.69267   1.54255   5.51762
  37        3PX        -0.05912  -0.30635   0.08204  -0.27199  -0.69417
  38        3PY        -0.09548  -0.42014   0.12233  -0.23435  -1.08278
  39        3PZ         0.18832  -0.56175   0.18131  -0.38718  -1.40445
  40        4XX        -0.01431  -0.01198   0.09018  -0.41820   0.12547
  41        4YY        -0.01035  -0.08016  -0.07429   0.36720  -0.33212
  42        4ZZ         0.03485  -0.07405   0.03044  -0.05809  -0.18058
  43        4XY        -0.05463  -0.04509   0.04196  -0.20784  -0.01560
  44        4XZ        -0.00174  -0.02257  -0.02794   0.07559   0.05709
  45        4YZ        -0.04055   0.03405  -0.00337  -0.01249   0.01815
  46 4   O  1S          0.00301  -0.03236   0.00372  -0.01718  -0.05597
  47        2S          0.02716  -0.45396   0.06625  -0.24634  -0.84052
  48        2PX        -0.06614  -0.00554  -0.00392   0.03955  -0.03596
  49        2PY        -0.10060   0.00754   0.00735  -0.03356  -0.00433
  50        2PZ         0.12126  -0.13171   0.01710  -0.06757  -0.23768
  51        3S         -0.11693   1.40022  -0.18161   0.75495   2.56480
  52        3PX         0.25806  -0.01190   0.00576  -0.08456   0.07377
  53        3PY         0.38849  -0.05268  -0.01242   0.07487   0.00816
  54        3PZ        -0.40668   0.72225  -0.11370   0.39242   1.32469
  55        4XX         0.00469  -0.02301   0.05141  -0.16298  -0.09629
  56        4YY        -0.00128  -0.12242  -0.01224   0.09127  -0.25869
  57        4ZZ         0.00992  -0.19707   0.00897  -0.11201  -0.26714
  58        4XY        -0.04255  -0.07873   0.02512  -0.10415  -0.13080
  59        4XZ         0.03931  -0.01350  -0.02735   0.09446   0.08238
  60        4YZ        -0.02526   0.00280   0.00486  -0.06842   0.01046
  61 5   O  1S         -0.01916   0.01504   0.00085   0.00599   0.01254
  62        2S         -0.26705   0.13356   0.01586   0.04667   0.04708
  63        2PX        -0.04236  -0.03122  -0.00307   0.01381  -0.07984
  64        2PY        -0.05234  -0.04327   0.00770  -0.03404  -0.06849
  65        2PZ        -0.01945  -0.02131  -0.00719  -0.00144   0.00134
  66        3S          0.83523  -0.62287  -0.01134  -0.25591  -0.59494
  67        3PX         0.20012   0.00243   0.03254  -0.13746   0.05594
  68        3PY         0.28807  -0.03105  -0.02063   0.06105  -0.02445
  69        3PZ        -0.22401   0.36741  -0.01721   0.16855   0.48972
  70        4XX         0.00207   0.01955   0.06429  -0.23515   0.06395
  71        4YY        -0.10921   0.01941  -0.05887   0.21110  -0.02407
  72        4ZZ        -0.10076   0.06751   0.00880   0.06182  -0.00457
  73        4XY        -0.04548   0.04141   0.01844  -0.06059   0.08754
  74        4XZ        -0.02334   0.06578   0.08565  -0.33197   0.05846
  75        4YZ         0.00371   0.02656  -0.06678   0.27958   0.06283
  76 6   O  1S          0.03998   0.02861   0.01078   0.00116  -0.01226
  77        2S          0.59501   0.31353   0.14820   0.01368  -0.24195
  78        2PX         0.23768  -0.03506  -0.02396   0.00195   0.10470
  79        2PY        -0.00128  -0.02131   0.01047   0.01332  -0.05210
  80        2PZ         0.02696  -0.03304  -0.01111  -0.02552  -0.06783
  81        3S         -1.56617  -1.39602  -0.55389  -0.05121   0.74367
  82        3PX        -0.62601  -0.33831  -0.11561  -0.01397   0.00314
  83        3PY        -0.30242  -0.61142  -0.27251  -0.04392   0.36399
  84        3PZ        -0.19521  -0.29455  -0.03584   0.03607   0.24031
  85        4XX         0.25127   0.00675   0.08237   0.00923  -0.07492
  86        4YY         0.21070   0.01977   0.20880   0.04701  -0.04178
  87        4ZZ         0.04276   0.19806  -0.18832  -0.04572  -0.03735
  88        4XY        -0.01933  -0.04839   0.12923   0.01218  -0.03961
  89        4XZ         0.03540   0.06175  -0.19171  -0.00512   0.08854
  90        4YZ         0.09053   0.00293  -0.20801  -0.04847  -0.05441
  91 7   O  1S          0.02541  -0.05569  -0.01882  -0.00139   0.02436
  92        2S          0.46015  -0.78211  -0.25345  -0.02330   0.30637
  93        2PX         0.28473   0.10193   0.02748   0.00799   0.02628
  94        2PY         0.05945   0.38638   0.14099   0.01669  -0.15697
  95        2PZ         0.09009   0.16831   0.04190  -0.01427  -0.06951
  96        3S         -1.18185   2.33658   0.78377   0.07036  -0.97197
  97        3PX        -1.06244  -0.26006  -0.10219  -0.01691   0.03364
  98        3PY        -0.13375  -1.45702  -0.54825  -0.05308   0.66435
  99        3PZ        -0.26172  -0.64410  -0.14392   0.01660   0.26323
 100        4XX         0.22868  -0.21747  -0.11346  -0.01549   0.10765
 101        4YY         0.15361  -0.21088  -0.34312  -0.04336   0.13934
 102        4ZZ        -0.00968  -0.18592   0.25858   0.04330  -0.00520
 103        4XY         0.00029   0.02216  -0.11097  -0.02820  -0.02030
 104        4XZ         0.04787  -0.05554   0.08699   0.03472   0.07853
 105        4YZ         0.08652  -0.21508   0.26593   0.04199  -0.02253
 106 8   C  1S          0.02819   0.02689   0.00947   0.00081  -0.00646
 107        2S          0.17841   0.35561   0.11597   0.00732  -0.06312
 108        2PX         0.12592   0.07217   0.02990   0.00305  -0.02501
 109        2PY         0.13900   0.05263   0.03822   0.00430  -0.00703
 110        2PZ         0.07307   0.05065  -0.02752  -0.00358  -0.00651
 111        3S          0.01786  -4.19937  -1.41741  -0.09400   1.46028
 112        3PX        -1.44838  -0.68874  -0.25502  -0.00979   0.20787
 113        3PY        -2.13998   1.87540   0.61696   0.04040  -1.10908
 114        3PZ        -1.02224   0.60940   0.29925   0.01569  -0.42189
 115        4XX         0.06886   0.08563   0.01080  -0.00273  -0.02096
 116        4YY         0.00023  -0.04754  -0.07699  -0.02495  -0.01094
 117        4ZZ        -0.03511  -0.04821   0.06409   0.02693   0.03315
 118        4XY        -0.02266   0.07617  -0.00597  -0.00740  -0.05327
 119        4XZ         0.00179   0.03188   0.07771   0.01529  -0.03783
 120        4YZ         0.04418  -0.01958   0.06768   0.02869   0.03371
 121 9   N  1S          0.03848  -0.07011  -0.02346  -0.00153   0.03117
 122        2S          0.57557  -0.90420  -0.28813  -0.01708   0.36530
 123        2PX         0.03990   0.02107   0.00294  -0.00217  -0.00605
 124        2PY         0.01806   0.03565   0.01505  -0.00200  -0.05593
 125        2PZ         0.02047   0.01492   0.02408   0.01300   0.00830
 126        3S         -2.32629   4.35516   1.45546   0.09156  -1.95194
 127        3PX         0.89886  -1.10023  -0.37765  -0.02812   0.51232
 128        3PY        -0.26815   1.13930   0.34840   0.01047  -0.43811
 129        3PZ         0.00489   0.28164   0.16067   0.03005  -0.07614
 130        4XX         0.26862  -0.19082  -0.14804  -0.03892   0.01521
 131        4YY         0.02277  -0.09761  -0.16291  -0.03816   0.03563
 132        4ZZ        -0.05084  -0.08150   0.19538   0.07043   0.09389
 133        4XY        -0.04461   0.05637  -0.16635  -0.06545  -0.07580
 134        4XZ         0.02101  -0.10371   0.33074   0.13808   0.19594
 135        4YZ         0.00001  -0.08318   0.10036   0.03237   0.05295
 136 10  C  1S         -0.08588  -0.04813  -0.01710  -0.00132   0.00843
 137        2S         -1.18662  -0.73218  -0.28471  -0.02451   0.19846
 138        2PX         0.08116   0.10618   0.03213   0.00133  -0.04607
 139        2PY         0.03511   0.06523   0.00361  -0.00270  -0.04825
 140        2PZ         0.02996   0.01892   0.07343   0.01678  -0.01314
 141        3S          4.42187   1.70250   0.64274   0.05296  -0.14532
 142        3PX        -0.74100  -0.02582   0.02874   0.00356  -0.13993
 143        3PY        -0.71878  -0.37228  -0.02908   0.01574   0.07653
 144        3PZ        -0.43196  -0.06666  -0.27528  -0.06144  -0.03517
 145        4XX        -0.07562   0.01609  -0.04619  -0.01131   0.00973
 146        4YY        -0.03194   0.02048  -0.05596  -0.01561  -0.05698
 147        4ZZ        -0.03760  -0.10259   0.07896   0.02491   0.06109
 148        4XY         0.05379   0.00550  -0.06749  -0.01296   0.04224
 149        4XZ        -0.00647  -0.01881   0.12595   0.03196   0.01920
 150        4YZ        -0.00512   0.01130   0.08231   0.01534  -0.03349
 151 11  H  1S          0.20291   0.05842  -0.03533   0.04089   0.16349
 152        2S          0.17669   0.02739   0.00711   0.06571   0.03857
 153        3PX         0.00733  -0.00538  -0.00925   0.03918  -0.03108
 154        3PY         0.02944  -0.01211   0.00008   0.01584  -0.05199
 155        3PZ        -0.00385  -0.00776   0.02204  -0.04768  -0.00794
 156 12  H  1S          0.15531  -0.00392  -0.01708  -0.00755   0.05149
 157        2S          0.21542   0.05087   0.04585  -0.02330  -0.03119
 158        3PX        -0.01070  -0.01479   0.00804  -0.01261  -0.00703
 159        3PY         0.01075  -0.00212  -0.00345  -0.00083  -0.00670
 160        3PZ        -0.00064   0.01756  -0.00816   0.02380   0.02179
 161 13  H  1S          0.16030   0.03844  -0.04315   0.00422   0.17155
 162        2S          0.31560   0.04564   0.09543   0.04498   0.02250
 163        3PX         0.01134  -0.02823   0.00952  -0.02238  -0.02287
 164        3PY         0.01325  -0.00810   0.00840  -0.04376   0.01342
 165        3PZ        -0.00707  -0.00609  -0.00413   0.02552  -0.03734
 166 14  H  1S          0.00680  -0.13652   0.03998  -0.08682  -0.34423
 167        2S         -0.10995  -0.17555   0.03157  -0.11677  -0.37150
 168        3PX         0.01793  -0.02541  -0.03755   0.18143  -0.10438
 169        3PY         0.00085   0.00063   0.03352  -0.14216   0.03606
 170        3PZ         0.01977  -0.00269   0.00475  -0.01105  -0.00035
 171 15  H  1S          0.01555   0.08694   0.00431   0.02844   0.08493
 172        2S          0.01585   0.07386   0.00344   0.02688   0.07784
 173        3PX        -0.01435  -0.00423  -0.05456   0.21300  -0.02196
 174        3PY         0.00908   0.02218   0.03867  -0.13879   0.03604
 175        3PZ         0.01350  -0.01565   0.00166  -0.02096  -0.01079
 176 16  H  1S         -0.19592  -0.18753  -0.06518  -0.00286   0.05980
 177        2S         -0.24198  -0.22956  -0.08079  -0.00490   0.08289
 178        3PX         0.00721  -0.00981  -0.00887  -0.00126   0.00655
 179        3PY         0.04787   0.03698   0.00693   0.00140   0.01631
 180        3PZ         0.00882   0.00083   0.03073   0.00851   0.01185
 181 17  H  1S         -0.32100  -0.15650  -0.08048  -0.01051   0.02120
 182        2S         -0.45776  -0.16437  -0.17401  -0.03564   0.00846
 183        3PX        -0.02491  -0.02920  -0.08730  -0.01974   0.01416
 184        3PY        -0.01616   0.00376  -0.05602  -0.01647  -0.01934
 185        3PZ        -0.00676   0.00974  -0.07153  -0.01964  -0.02225
 186 18  H  1S         -0.31491  -0.17242  -0.03439  -0.00040   0.01792
 187        2S         -0.42652  -0.21236   0.00217   0.01860   0.06140
 188        3PX        -0.03016  -0.06861   0.05933   0.01906   0.02854
 189        3PY        -0.01655  -0.04069   0.06407   0.01821  -0.00211
 190        3PZ        -0.01112  -0.01255   0.00194   0.00259   0.01308
 191 19  H  1S          0.07988  -0.30720  -0.10511  -0.00717   0.11722
 192        2S          0.44941  -0.10457  -0.02894  -0.00397   0.10922
 193        3PX        -0.02789   0.02023   0.03814   0.01167   0.01854
 194        3PY         0.05209  -0.04781   0.08180   0.03307   0.04224
 195        3PZ         0.03280   0.04504  -0.21868  -0.08111  -0.09807
                         116       117       118       119       120
                           V         V         V         V         V
     Eigenvalues --     1.60929   1.62180   1.62529   1.64098   1.71970
   1 1   C  1S         -0.01795   0.00572   0.01013   0.00529  -0.07154
   2        2S         -0.05212   0.02958   0.02622   0.02957  -0.32514
   3        2PX        -0.09463   0.01980   0.00443   0.00734  -0.11764
   4        2PY        -0.14174   0.04261   0.03780   0.01550  -0.17441
   5        2PZ         0.04226   0.02039  -0.06360  -0.01968   0.27506
   6        3S          1.39425  -0.29144  -0.82603  -0.33983   3.49050
   7        3PX         0.20416  -0.03806   0.23360   0.05133  -0.43618
   8        3PY         0.21755  -0.17150   0.25594   0.07323  -0.47525
   9        3PZ         0.87893  -0.31883  -0.08778  -0.08384   0.78533
  10        4XX        -0.17107   0.02015  -0.05128  -0.00142   0.13832
  11        4YY        -0.16077   0.10086  -0.03516  -0.01713   0.03622
  12        4ZZ         0.33738  -0.12331   0.09399   0.02053  -0.20855
  13        4XY        -0.00143  -0.01407   0.01937   0.00099   0.08771
  14        4XZ         0.10459  -0.02356   0.04804   0.00153   0.05304
  15        4YZ         0.13025  -0.05439   0.00505   0.00187   0.11094
  16 2   C  1S          0.00316  -0.00220  -0.00154  -0.00140   0.01885
  17        2S          0.10432  -0.05921   0.03097  -0.01313   0.59462
  18        2PX         0.15084  -0.05035   0.06009  -0.00203   0.13202
  19        2PY         0.21644  -0.09070  -0.01451  -0.02594   0.13461
  20        2PZ         0.08870  -0.03925   0.05469   0.00833  -0.16244
  21        3S         -0.71757   0.70139  -1.20221  -0.08277  -2.16787
  22        3PX        -0.96846   0.17470   0.16168   0.07404  -0.57277
  23        3PY        -1.36316   0.39176   0.45361   0.14368  -1.09817
  24        3PZ         0.80076   0.15638  -1.61744  -0.43235   2.75579
  25        4XX         0.04463   0.10525   0.11838   0.01021   0.02616
  26        4YY        -0.02776  -0.10876  -0.11856  -0.00073  -0.13101
  27        4ZZ        -0.02484   0.01269  -0.02869  -0.01241   0.04182
  28        4XY        -0.04101   0.04781   0.10239   0.02801   0.00467
  29        4XZ         0.02431   0.10924   0.03616  -0.01437   0.18227
  30        4YZ        -0.01431  -0.06135  -0.10873  -0.01736   0.40985
  31 3   N  1S          0.01086   0.00623  -0.03238  -0.00687   0.01414
  32        2S         -0.12010   0.16597  -0.42383  -0.07052   0.00451
  33        2PX         0.06708  -0.08795  -0.01733  -0.00559  -0.01936
  34        2PY         0.11270  -0.00814   0.05439  -0.00204  -0.08270
  35        2PZ         0.08792  -0.02193  -0.01789  -0.01357   0.17297
  36        3S         -0.12308  -0.61241   2.21511   0.44734  -1.17292
  37        3PX         0.20455   0.02361  -0.31459  -0.05756   0.23806
  38        3PY         0.29453   0.03146  -0.38524  -0.08666   0.47241
  39        3PZ        -0.20189   0.23582  -0.59513  -0.11229   0.11216
  40        4XX         0.01660  -0.24953  -0.29020  -0.01200  -0.05692
  41        4YY         0.08978   0.23376   0.22391   0.00291  -0.17245
  42        4ZZ        -0.10603   0.06210  -0.08705  -0.01585   0.18549
  43        4XY         0.02275  -0.11186  -0.14110  -0.00487  -0.20111
  44        4XZ         0.06037  -0.10614  -0.00251   0.00914  -0.10214
  45        4YZ         0.14913  -0.00255   0.07380  -0.00006  -0.32791
  46 4   O  1S          0.02671  -0.00025  -0.02135  -0.00121  -0.01341
  47        2S          0.32399   0.01106  -0.32333  -0.02754  -0.43451
  48        2PX        -0.07299   0.02657  -0.00405  -0.00034  -0.07179
  49        2PY        -0.10214   0.02995  -0.01603  -0.00233  -0.13218
  50        2PZ         0.21606  -0.03577  -0.08244  -0.01385  -0.05386
  51        3S         -1.24977   0.03393   0.97388   0.07465   1.11684
  52        3PX         0.23730  -0.00048   0.12412   0.00067   0.12082
  53        3PY         0.30582  -0.17071  -0.00917  -0.01160   0.24598
  54        3PZ        -0.65779   0.02909   0.49733   0.07182  -0.00531
  55        4XX         0.14986  -0.09713  -0.13005  -0.02324   0.00540
  56        4YY         0.22407  -0.00188   0.01026  -0.00975   0.10696
  57        4ZZ        -0.11227   0.10160  -0.11490   0.01371  -0.37100
  58        4XY         0.11306  -0.03826  -0.07017  -0.00998  -0.02411
  59        4XZ        -0.23001  -0.17119  -0.25362  -0.00327  -0.12080
  60        4YZ        -0.19292   0.24436   0.15949   0.02789  -0.09943
  61 5   O  1S         -0.00401  -0.00178   0.00553  -0.00168   0.03214
  62        2S          0.07709  -0.05408   0.04065  -0.02516   0.27779
  63        2PX         0.11447  -0.00671   0.01752  -0.00405  -0.03364
  64        2PY         0.14988  -0.06717  -0.02785  -0.00786  -0.04318
  65        2PZ         0.07974  -0.03151   0.01644   0.00245  -0.07920
  66        3S          0.23010   0.05997  -0.25793   0.04480  -0.91402
  67        3PX        -0.18972   0.10445  -0.00719   0.01573  -0.02587
  68        3PY        -0.27776   0.11077  -0.07935   0.01554  -0.06183
  69        3PZ        -0.36195   0.04822   0.16162   0.00444   0.31735
  70        4XX        -0.11621   0.11483   0.07124   0.01279   0.01532
  71        4YY        -0.21001   0.01610  -0.08331  -0.00251   0.02374
  72        4ZZ         0.39344  -0.17499   0.04258  -0.03182   0.22631
  73        4XY        -0.06663   0.02525   0.04775   0.00429   0.07200
  74        4XZ         0.09643   0.24115   0.28388   0.01553   0.01308
  75        4YZ        -0.06880  -0.18599  -0.15975  -0.01022   0.03684
  76 6   O  1S          0.00119  -0.00094  -0.00362  -0.00398  -0.00215
  77        2S          0.05278  -0.03101  -0.07391  -0.02000  -0.04307
  78        2PX        -0.00550   0.00380   0.03968   0.10266   0.05664
  79        2PY         0.00510   0.00596  -0.03160  -0.05999  -0.04921
  80        2PZ         0.00151  -0.02045  -0.00203  -0.01439   0.01786
  81        3S         -0.10030   0.06228   0.22692   0.20145   0.14832
  82        3PX         0.01580  -0.00413  -0.01551  -0.02817  -0.07381
  83        3PY        -0.00923   0.02032   0.12355   0.12330   0.14651
  84        3PZ        -0.02944  -0.00158   0.08160   0.05237  -0.00339
  85        4XX        -0.01222  -0.03687   0.01370  -0.23350  -0.05493
  86        4YY        -0.03153  -0.11705   0.08460   0.24106  -0.05274
  87        4ZZ         0.07837   0.13395  -0.14395  -0.03707   0.07865
  88        4XY        -0.04935  -0.07857   0.07089  -0.12049   0.05043
  89        4XZ         0.06182   0.15501  -0.12720  -0.05800  -0.04460
  90        4YZ         0.06412   0.09191  -0.11903   0.13508   0.01744
  91 7   O  1S          0.00250  -0.00123   0.00913   0.01375   0.00215
  92        2S          0.05145  -0.03343   0.11148   0.23753   0.09621
  93        2PX         0.03952  -0.00922   0.02371   0.03048   0.01925
  94        2PY        -0.00001   0.00837  -0.05804  -0.15135  -0.03814
  95        2PZ        -0.03031  -0.00988  -0.01372  -0.05762  -0.02011
  96        3S         -0.12901   0.09777  -0.35900  -0.92557  -0.18699
  97        3PX        -0.11706   0.06119  -0.04073   0.00436   0.04511
  98        3PY         0.02394   0.03647   0.19704   0.20797   0.16843
  99        3PZ         0.01692  -0.06352   0.16338   0.08118   0.08333
 100        4XX         0.01613  -0.04141   0.07513   0.18925   0.03030
 101        4YY         0.09552   0.21396  -0.16794  -0.14198   0.01081
 102        4ZZ        -0.07800  -0.19142   0.18180   0.11616   0.00961
 103        4XY         0.00523  -0.01332  -0.00886   0.32937   0.04926
 104        4XZ         0.04319   0.10341  -0.09287   0.15583   0.01110
 105        4YZ        -0.10812  -0.24871   0.24923  -0.10380  -0.00699
 106 8   C  1S          0.00152  -0.00068  -0.00122  -0.00028   0.00042
 107        2S          0.01638  -0.01242  -0.00889   0.06058   0.02640
 108        2PX        -0.00587  -0.00858  -0.00463   0.19407   0.01483
 109        2PY         0.00719   0.00385   0.00116  -0.11975   0.00298
 110        2PZ         0.00358  -0.00005   0.00296  -0.01972   0.00221
 111        3S          0.10896   0.08232   0.46325  -0.95002   0.18026
 112        3PX        -0.05487   0.11626   0.02844  -1.17057   0.04742
 113        3PY        -0.13973  -0.08314  -0.42008   1.02118  -0.51787
 114        3PZ        -0.07685   0.02222  -0.21038   0.23218  -0.18950
 115        4XX         0.01414   0.02223  -0.03069  -0.05052  -0.03640
 116        4YY        -0.02377  -0.04801   0.04665   0.01493   0.02615
 117        4ZZ         0.01395   0.02447  -0.01624   0.02601   0.01450
 118        4XY         0.00509   0.03126  -0.05314  -0.00626  -0.02454
 119        4XZ        -0.03172  -0.10824   0.09705  -0.02360  -0.03004
 120        4YZ         0.02772   0.06837  -0.05972  -0.01056   0.00144
 121 9   N  1S          0.00319   0.00191   0.01091  -0.02172   0.01115
 122        2S          0.03930   0.03309   0.12514  -0.47965   0.09377
 123        2PX        -0.00053  -0.01917   0.00970   0.17419   0.03040
 124        2PY        -0.00978  -0.02386   0.00407  -0.03463  -0.03260
 125        2PZ         0.02262   0.05766  -0.05956   0.01449  -0.00884
 126        3S         -0.19072  -0.15982  -0.68535   2.05265  -0.64637
 127        3PX         0.05659   0.02675   0.18970  -0.45782   0.15324
 128        3PY        -0.05116  -0.04438  -0.13926   0.46434  -0.10349
 129        3PZ         0.01186   0.00406  -0.03968   0.12542  -0.01949
 130        4XX        -0.01975  -0.09243   0.09588   0.12948   0.04555
 131        4YY        -0.01309   0.00846   0.02357  -0.24035  -0.00019
 132        4ZZ         0.04982   0.09489  -0.07065  -0.03528  -0.00635
 133        4XY        -0.07061  -0.12048   0.11597  -0.20032  -0.01783
 134        4XZ         0.15134   0.32141  -0.27245  -0.03114   0.00096
 135        4YZ         0.00145   0.00042   0.02293  -0.14122  -0.01256
 136 10  C  1S         -0.00374   0.00219   0.00004   0.00021  -0.00343
 137        2S         -0.04907   0.03269   0.03386   0.02250  -0.00878
 138        2PX         0.00321  -0.00604  -0.00854  -0.08289  -0.01475
 139        2PY        -0.00074  -0.00659  -0.01415   0.02428  -0.01693
 140        2PZ         0.00714   0.01177  -0.01998  -0.00169  -0.00876
 141        3S          0.19000  -0.08945   0.08775  -0.05394   0.28136
 142        3PX        -0.05040  -0.02042  -0.08644   0.75790  -0.11375
 143        3PY        -0.01564   0.05209  -0.01489  -0.40815  -0.05322
 144        3PZ        -0.03379  -0.04365   0.03545  -0.04605  -0.03799
 145        4XX        -0.00699   0.00114   0.01159  -0.12596   0.00646
 146        4YY        -0.00925  -0.02577  -0.01345   0.28956  -0.02322
 147        4ZZ         0.01069   0.02720   0.00282  -0.14954   0.01729
 148        4XY         0.00419   0.01159   0.02560  -0.29782   0.01816
 149        4XZ         0.00505   0.02150  -0.01298  -0.05988   0.00335
 150        4YZ        -0.00191  -0.00141  -0.02315   0.15658  -0.00896
 151 11  H  1S          0.00592   0.00569   0.02135   0.01071  -0.25551
 152        2S          0.12652  -0.03191   0.09166   0.01510  -0.11536
 153        3PX         0.08050  -0.01318   0.01015  -0.00301  -0.04033
 154        3PY         0.01462   0.01780  -0.00713  -0.00753  -0.02436
 155        3PZ        -0.09917   0.01686  -0.01852   0.00079   0.07101
 156 12  H  1S         -0.14765   0.05879  -0.00572   0.01260  -0.32621
 157        2S         -0.32162   0.11567  -0.04695   0.01371  -0.13822
 158        3PX        -0.02552  -0.01115  -0.00422   0.00381  -0.02552
 159        3PY        -0.03115   0.02506  -0.00355   0.00023  -0.05771
 160        3PZ         0.18465  -0.06762   0.02848   0.00178   0.02813
 161 13  H  1S         -0.00737   0.02671   0.07757   0.02911  -0.15945
 162        2S          0.11859  -0.14920   0.00460  -0.01301  -0.12700
 163        3PX        -0.02570  -0.01067  -0.00990   0.00129   0.04064
 164        3PY         0.08018  -0.04352  -0.00297   0.00043   0.06185
 165        3PZ        -0.09516   0.04299  -0.01637  -0.00059  -0.01217
 166 14  H  1S          0.17528  -0.01587  -0.11827  -0.03186   0.00664
 167        2S          0.10054   0.01230  -0.13065  -0.01836  -0.01672
 168        3PX        -0.02167   0.14627   0.14325   0.00804   0.08644
 169        3PY        -0.05704  -0.06753  -0.12449  -0.00826   0.04925
 170        3PZ        -0.06388   0.02407  -0.01415  -0.00068   0.06832
 171 15  H  1S         -0.12968   0.03760   0.01283  -0.00168   0.11357
 172        2S         -0.07099   0.01584   0.01821  -0.00182   0.13121
 173        3PX        -0.02800  -0.11967  -0.12936  -0.01122  -0.00447
 174        3PY         0.04795   0.06897   0.10334   0.00568   0.00755
 175        3PZ        -0.12627   0.05515  -0.01891   0.00609   0.00597
 176 16  H  1S         -0.00090   0.01861   0.00957  -0.13358  -0.00195
[truncated: 11,099,183 more chars]
