# Supplementary material for: The reaction of acetonitrile with hydrogen peroxide in alkaline medium: a DFT mechanistic study of green production of amides
Source: Royal Society of Chemistry journal article supplement (doi:10.1039/d3cp02024j), 2023-01-01
Supplement: d3cp02024j5.log [file d3cp02024j5.log]

 Entering Gaussian System, Link 0=/local/share/g09/g09
 Initial command:
 /local/share/g09/l1.exe /local/scratch/carlotto/g09run32603/Gau-32666.inp -scrdir=/local/scratch/carlotto/g09run32603/
 Entering Link 1 = /local/share/g09/l1.exe PID=     32667.
  
 Copyright (c) 1988,1990,1992,1993,1995,1998,2003,2009,2010,
            Gaussian, Inc.  All Rights Reserved.
  
 This is part of the Gaussian(R) 09 program.  It is based on
 the Gaussian(R) 03 system (copyright 2003, Gaussian, Inc.),
 the Gaussian(R) 98 system (copyright 1998, Gaussian, Inc.),
 the Gaussian(R) 94 system (copyright 1995, Gaussian, Inc.),
 the Gaussian 92(TM) system (copyright 1992, Gaussian, Inc.),
 the Gaussian 90(TM) system (copyright 1990, Gaussian, Inc.),
 the Gaussian 88(TM) system (copyright 1988, Gaussian, Inc.),
 the Gaussian 86(TM) system (copyright 1986, Carnegie Mellon
 University), and the Gaussian 82(TM) system (copyright 1983,
 Carnegie Mellon University). Gaussian is a federally registered
 trademark of Gaussian, Inc.
  
 This software contains proprietary and confidential information,
 including trade secrets, belonging to Gaussian, Inc.
  
 This software is provided under written license and may be
 used, copied, transmitted, or stored only in accord with that
 written license.
  
 The following legend is applicable only to US Government
 contracts under FAR:
  
                    RESTRICTED RIGHTS LEGEND
  
 Use, reproduction and disclosure by the US Government is
 subject to restrictions as set forth in subparagraphs (a)
 and (c) of the Commercial Computer Software - Restricted
 Rights clause in FAR 52.227-19.
  
 Gaussian, Inc.
 340 Quinnipiac St., Bldg. 40, Wallingford CT 06492
  
  
 ---------------------------------------------------------------
 Warning -- This program may not be used in any manner that
 competes with the business of Gaussian, Inc. or will provide
 assistance to any competitor of Gaussian, Inc.  The licensee
 of this program is prohibited from giving any competitor of
 Gaussian, Inc. access to this program.  By using this program,
 the user acknowledges that Gaussian, Inc. is engaged in the
 business of creating and licensing software in the field of
 computational chemistry and represents and warrants to the
 licensee that it is not a competitor of Gaussian, Inc. and that
 it will not use this program in any manner prohibited above.
 ---------------------------------------------------------------
  

 Cite this work as:
 Gaussian 09, Revision B.01,
 M. J. Frisch, G. W. Trucks, H. B. Schlegel, G. E. Scuseria, 
 M. A. Robb, J. R. Cheeseman, G. Scalmani, V. Barone, B. Mennucci, 
 G. A. Petersson, H. Nakatsuji, M. Caricato, X. Li, H. P. Hratchian, 
 A. F. Izmaylov, J. Bloino, G. Zheng, J. L. Sonnenberg, M. Hada, 
 M. Ehara, K. Toyota, R. Fukuda, J. Hasegawa, M. Ishida, T. Nakajima, 
 Y. Honda, O. Kitao, H. Nakai, T. Vreven, J. A. Montgomery, Jr., 
 J. E. Peralta, F. Ogliaro, M. Bearpark, J. J. Heyd, E. Brothers, 
 K. N. Kudin, V. N. Staroverov, T. Keith, R. Kobayashi, J. Normand, 
 K. Raghavachari, A. Rendell, J. C. Burant, S. S. Iyengar, J. Tomasi, 
 M. Cossi, N. Rega, J. M. Millam, M. Klene, J. E. Knox, J. B. Cross, 
 V. Bakken, C. Adamo, J. Jaramillo, R. Gomperts, R. E. Stratmann, 
 O. Yazyev, A. J. Austin, R. Cammi, C. Pomelli, J. W. Ochterski, 
 R. L. Martin, K. Morokuma, V. G. Zakrzewski, G. A. Voth, 
 P. Salvador, J. J. Dannenberg, S. Dapprich, A. D. Daniels, 
 O. Farkas, J. B. Foresman, J. V. Ortiz, J. Cioslowski, 
 and D. J. Fox, Gaussian, Inc., Wallingford CT, 2010.
 
 ******************************************
 Gaussian 09:  EM64L-G09RevB.01 12-Aug-2010
                 2-May-2023 
 ******************************************
 %NProcLinda=4
 Will use up to    4 processors via Linda.
 %NProcShared=4
 Will use up to    4 processors via shared memory.
 %Chk=acn_prot.chk
 ----------------------------------------------------------------------
 #p test uM06L/6-31G(d,p) density=Current int(ultrafine,acc2e=11) GFInp
  opt=modredundant freq(NoRaman) popul(Full,NBORead) scf(MaxCycle=200) 
 scrf(SMD,solvent=water)
 ----------------------------------------------------------------------
 1/14=-1,18=120,19=15,26=3,38=1/1,3;
 2/9=110,12=2,17=6,18=5,40=1/2;
 3/5=1,6=6,7=101,11=2,16=1,24=10,25=1,30=1,70=32201,71=1,72=1,74=-53,75=-5,116=2/1,2,3;
 4//1;
 5/5=2,7=200,38=5,53=1,87=11/2;
 6/7=3,22=-1,28=1,40=1/1,7;
 7/87=11/1,2,3,16;
 1/14=-1,18=20,19=15/3(2);
 2/9=110/2;
 99//99;
 2/9=110/2;
 3/5=1,6=6,7=101,11=2,16=1,25=1,30=1,70=32205,71=1,72=1,74=-53,75=-5,116=2/1,2,3;
 4/5=5,16=3/1;
 5/5=2,7=200,38=5,53=1,87=11/2;
 7/87=11/1,2,3,16;
 1/14=-1,18=20,19=15/3(-5);
 2/9=110/2;
 6/7=3,19=2,22=-1,28=1,40=1/1,7;
 99/9=1/99;
 Leave Link    1 at Tue May  2 09:23:09 2023, MaxMem=          0 cpu:       0.4
 (Enter /local/share/g09/l101.exe)
 ---
 TS1
 ---
 Symbolic Z-matrix:
 Charge = -1 Multiplicity = 1
 C                     0.        0.        0. 
 C                     0.        0.        1.52684 
 O                     1.24814   0.        2.11553 
 N                    -1.13091   0.0001    2.20634 
 H                    -1.00002   0.00047  -0.44601 
 H                     0.54241   0.87513  -0.37598 
 H                     0.54155  -0.87568  -0.37595 
 H                     1.91451  -0.00008   1.44266 
 
 NAtoms=      8 NQM=      8 NQMF=      0 NMic=      0 NMicF=      0 NTot=      8.
 The following ModRedundant input section has been read:
 D       1       2       3       8 S  18 20.000                                
                    Isotopes and Nuclear Properties:
 (Nuclear quadrupole moments (NQMom) in fm**2, nuclear magnetic moments (NMagM)
  in nuclear magnetons)

  Atom         1           2           3           4           5           6           7           8
 IAtWgt=          12          12          16          14           1           1           1           1
 AtmWgt=  12.0000000  12.0000000  15.9949146  14.0030740   1.0078250   1.0078250   1.0078250   1.0078250
 NucSpn=           0           0           0           2           1           1           1           1
 AtZEff=   0.0000000   0.0000000   0.0000000   0.0000000   0.0000000   0.0000000   0.0000000   0.0000000
 NQMom=    0.0000000   0.0000000   0.0000000   2.0440000   0.0000000   0.0000000   0.0000000   0.0000000
 NMagM=    0.0000000   0.0000000   0.0000000   0.4037610   2.7928460   2.7928460   2.7928460   2.7928460
 Leave Link  101 at Tue May  2 09:23:10 2023, MaxMem=   33554432 cpu:       0.7
 (Enter /local/share/g09/l103.exe)

 GradGradGradGradGradGradGradGradGradGradGradGradGradGradGradGradGradGrad
 Berny optimization.
 Initialization pass.
                           ----------------------------
                           !    Initial Parameters    !
                           ! (Angstroms and Degrees)  !
 --------------------------                            --------------------------
 ! Name  Definition              Value          Derivative Info.                !
 --------------------------------------------------------------------------------
 ! R1    R(1,2)                  1.5268         estimate D2E/DX2                !
 ! R2    R(1,5)                  1.095          estimate D2E/DX2                !
 ! R3    R(1,6)                  1.0961         estimate D2E/DX2                !
 ! R4    R(1,7)                  1.0961         estimate D2E/DX2                !
 ! R5    R(2,3)                  1.38           estimate D2E/DX2                !
 ! R6    R(2,4)                  1.3193         estimate D2E/DX2                !
 ! R7    R(3,8)                  0.947          estimate D2E/DX2                !
 ! A1    A(2,1,5)              114.037          estimate D2E/DX2                !
 ! A2    A(2,1,6)              110.061          estimate D2E/DX2                !
 ! A3    A(2,1,7)              110.059          estimate D2E/DX2                !
 ! A4    A(5,1,6)              108.1726         estimate D2E/DX2                !
 ! A5    A(5,1,7)              108.1715         estimate D2E/DX2                !
 ! A6    A(6,1,7)              106.0041         estimate D2E/DX2                !
 ! A7    A(1,2,3)              115.251          estimate D2E/DX2                !
 ! A8    A(1,2,4)              120.999          estimate D2E/DX2                !
 ! A9    A(3,2,4)              123.75           estimate D2E/DX2                !
 ! A10   A(2,3,8)              109.4712         estimate D2E/DX2                !
 ! D1    D(5,1,2,3)           -179.9731         estimate D2E/DX2                !
 ! D2    D(5,1,2,4)              0.022          estimate D2E/DX2                !
 ! D3    D(6,1,2,3)            -58.2091         estimate D2E/DX2                !
 ! D4    D(6,1,2,4)            121.786          estimate D2E/DX2                !
 ! D5    D(7,1,2,3)             58.2658         estimate D2E/DX2                !
 ! D6    D(7,1,2,4)           -121.739          estimate D2E/DX2                !
 ! D7    D(1,2,3,8)             -0.005          Scan                            !
 ! D8    D(4,2,3,8)           -180.0            estimate D2E/DX2                !
 --------------------------------------------------------------------------------
 Trust Radius=3.00D-01 FncErr=1.00D-07 GrdErr=1.00D-06
 Number of optimizations in scan=  19
 Number of steps in this run=     35 maximum allowed number of steps=    100.
 GradGradGradGradGradGradGradGradGradGradGradGradGradGradGradGradGradGrad

 Leave Link  103 at Tue May  2 09:23:10 2023, MaxMem=   33554432 cpu:       0.0
 (Enter /local/share/g09/l202.exe)
                          Input orientation:                          
 ---------------------------------------------------------------------
 Center     Atomic      Atomic             Coordinates (Angstroms)
 Number     Number       Type             X           Y           Z
 ---------------------------------------------------------------------
      1          6           0        0.000000    0.000000    0.000000
      2          6           0        0.000000    0.000000    1.526844
      3          8           0        1.248138    0.000000    2.115531
      4          7           0       -1.130913    0.000096    2.206338
      5          1           0       -1.000017    0.000469   -0.446010
      6          1           0        0.542412    0.875133   -0.375984
      7          1           0        0.541553   -0.875681   -0.375949
      8          1           0        1.914514   -0.000078    1.442662
 ---------------------------------------------------------------------
                    Distance matrix (angstroms):
                    1          2          3          4          5
     1  C    0.000000
     2  C    1.526844   0.000000
     3  O    2.456282   1.380000   0.000000
     4  N    2.479293   1.319347   2.380783   0.000000
     5  H    1.094970   2.211829   3.408180   2.655576   0.000000
     6  H    1.096099   2.163521   2.733414   3.199077   1.774550
     7  H    1.096100   2.163497   2.733780   3.198802   1.774538
     8  H    2.397215   1.916364   0.947000   3.139718   3.472978
                    6          7          8
     6  H    0.000000
     7  H    1.750814   0.000000
     8  H    2.440519   2.441116   0.000000
 Stoichiometry    C2H4NO(1-)
 Framework group  C1[X(C2H4NO)]
 Deg. of freedom    18
 Full point group                 C1      NOp   1
 Largest Abelian subgroup         C1      NOp   1
 Largest concise Abelian subgroup C1      NOp   1
                         Standard orientation:                         
 ---------------------------------------------------------------------
 Center     Atomic      Atomic             Coordinates (Angstroms)
 Number     Number       Type             X           Y           Z
 ---------------------------------------------------------------------
      1          6           0       -1.342484   -0.175703   -0.000010
      2          6           0        0.145124    0.168210    0.000026
      3          8           0        0.999819   -0.915255   -0.000011
      4          7           0        0.552425    1.423113   -0.000007
      5          1           0       -2.002281    0.698155   -0.000449
      6          1           0       -1.586618   -0.788824   -0.875174
      7          1           0       -1.586802   -0.788059    0.875640
      8          1           0        0.494338   -1.716067    0.000023
 ---------------------------------------------------------------------
 Rotational constants (GHZ):     10.4072152      9.5847828      5.1465130
 Leave Link  202 at Tue May  2 09:23:10 2023, MaxMem=   33554432 cpu:       0.2
 (Enter /local/share/g09/l301.exe)
 Standard basis: 6-31G(d,p) (6D, 7F)
 Ernie: Thresh=  0.10000D-02 Tol=  0.10000D-05 Strict=F.
 AO basis set in the form of general basis input (Overlap normalization):
      1 0
 S   6 1.00       0.000000000000
      0.3047524880D+04  0.1834737132D-02
      0.4573695180D+03  0.1403732281D-01
      0.1039486850D+03  0.6884262226D-01
      0.2921015530D+02  0.2321844432D+00
      0.9286662960D+01  0.4679413484D+00
      0.3163926960D+01  0.3623119853D+00
 SP   3 1.00       0.000000000000
      0.7868272350D+01 -0.1193324198D+00  0.6899906659D-01
      0.1881288540D+01 -0.1608541517D+00  0.3164239610D+00
      0.5442492580D+00  0.1143456438D+01  0.7443082909D+00
 SP   1 1.00       0.000000000000
      0.1687144782D+00  0.1000000000D+01  0.1000000000D+01
 D   1 1.00       0.000000000000
      0.8000000000D+00  0.1000000000D+01
 ****
      2 0
 S   6 1.00       0.000000000000
      0.3047524880D+04  0.1834737132D-02
      0.4573695180D+03  0.1403732281D-01
      0.1039486850D+03  0.6884262226D-01
      0.2921015530D+02  0.2321844432D+00
      0.9286662960D+01  0.4679413484D+00
      0.3163926960D+01  0.3623119853D+00
 SP   3 1.00       0.000000000000
      0.7868272350D+01 -0.1193324198D+00  0.6899906659D-01
      0.1881288540D+01 -0.1608541517D+00  0.3164239610D+00
      0.5442492580D+00  0.1143456438D+01  0.7443082909D+00
 SP   1 1.00       0.000000000000
      0.1687144782D+00  0.1000000000D+01  0.1000000000D+01
 D   1 1.00       0.000000000000
      0.8000000000D+00  0.1000000000D+01
 ****
      3 0
 S   6 1.00       0.000000000000
      0.5484671660D+04  0.1831074430D-02
      0.8252349460D+03  0.1395017220D-01
      0.1880469580D+03  0.6844507810D-01
      0.5296450000D+02  0.2327143360D+00
      0.1689757040D+02  0.4701928980D+00
      0.5799635340D+01  0.3585208530D+00
 SP   3 1.00       0.000000000000
      0.1553961625D+02 -0.1107775495D+00  0.7087426823D-01
      0.3599933586D+01 -0.1480262627D+00  0.3397528391D+00
      0.1013761750D+01  0.1130767015D+01  0.7271585773D+00
 SP   1 1.00       0.000000000000
      0.2700058226D+00  0.1000000000D+01  0.1000000000D+01
 D   1 1.00       0.000000000000
      0.8000000000D+00  0.1000000000D+01
 ****
      4 0
 S   6 1.00       0.000000000000
      0.4173511460D+04  0.1834772160D-02
      0.6274579110D+03  0.1399462700D-01
      0.1429020930D+03  0.6858655181D-01
      0.4023432930D+02  0.2322408730D+00
      0.1282021290D+02  0.4690699481D+00
      0.4390437010D+01  0.3604551991D+00
 SP   3 1.00       0.000000000000
      0.1162636186D+02 -0.1149611817D+00  0.6757974388D-01
      0.2716279807D+01 -0.1691174786D+00  0.3239072959D+00
      0.7722183966D+00  0.1145851947D+01  0.7408951398D+00
 SP   1 1.00       0.000000000000
      0.2120314975D+00  0.1000000000D+01  0.1000000000D+01
 D   1 1.00       0.000000000000
      0.8000000000D+00  0.1000000000D+01
 ****
      5 0
 S   3 1.00       0.000000000000
      0.1873113696D+02  0.3349460434D-01
      0.2825394365D+01  0.2347269535D+00
      0.6401216923D+00  0.8137573261D+00
 S   1 1.00       0.000000000000
      0.1612777588D+00  0.1000000000D+01
 P   1 1.00       0.000000000000
      0.1100000000D+01  0.1000000000D+01
 ****
      6 0
 S   3 1.00       0.000000000000
      0.1873113696D+02  0.3349460434D-01
      0.2825394365D+01  0.2347269535D+00
      0.6401216923D+00  0.8137573261D+00
 S   1 1.00       0.000000000000
      0.1612777588D+00  0.1000000000D+01
 P   1 1.00       0.000000000000
      0.1100000000D+01  0.1000000000D+01
 ****
      7 0
 S   3 1.00       0.000000000000
      0.1873113696D+02  0.3349460434D-01
      0.2825394365D+01  0.2347269535D+00
      0.6401216923D+00  0.8137573261D+00
 S   1 1.00       0.000000000000
      0.1612777588D+00  0.1000000000D+01
 P   1 1.00       0.000000000000
      0.1100000000D+01  0.1000000000D+01
 ****
      8 0
 S   3 1.00       0.000000000000
      0.1873113696D+02  0.3349460434D-01
      0.2825394365D+01  0.2347269535D+00
      0.6401216923D+00  0.8137573261D+00
 S   1 1.00       0.000000000000
      0.1612777588D+00  0.1000000000D+01
 P   1 1.00       0.000000000000
      0.1100000000D+01  0.1000000000D+01
 ****

 There are    80 symmetry adapted basis functions of A   symmetry.
 Integral buffers will be    131072 words long.
 Raffenetti 2 integral format.
 Two-electron integral symmetry is turned on.
    80 basis functions,   140 primitive gaussians,    80 cartesian basis functions
    16 alpha electrons       16 beta electrons
       nuclear repulsion energy       110.7115220323 Hartrees.
 IExCor= 4134 DFT=T Ex+Corr=M06L ExCW=0 ScaHFX=  0.000000
 ScaDFX=  1.000000  1.000000  1.000000  1.000000 ScalE2=  1.000000  1.000000
 IRadAn=      5 IRanWt=     -1 IRanGd=            0 ICorTp=0
 NAtoms=    8 NActive=    8 NUniq=    8 SFac= 1.00D+00 NAtFMM=   50 NAOKFM=F Big=F
 ------------------------------------------------------------------------------
 Polarizable Continuum Model (PCM)
 =================================
 Model                : PCM.
 Atomic radii         : SMD-Coulomb.
 Polarization charges : Total charges.
 Charge compensation  : None.
 Solution method      : Matrix inversion.
 Cavity type          : VdW (van der Waals Surface) (Alpha=1.000).
 Cavity algorithm     : GePol (No added spheres)
                        Default sphere list used, NSphG=    8.
                        Lebedev-Laikov grids with approx.  5.0 points / Ang**2.
                        Smoothing algorithm: Karplus/York (Gamma=1.0000).
                        Polarization charges: spherical gaussians, with
                                              point-specific exponents (IZeta= 3).
                        Self-potential: point-specific (ISelfS= 7).
                        Self-field    : sphere-specific E.n sum rule (ISelfD= 2).
 1st derivatives      : Analytical E(r).r(x)/FMM algorithm (CHGder, D1EAlg=3).
                        Cavity 1st derivative terms included.
 Solvent              : Water, Eps=  78.355300 Eps(inf)=   1.777849
 ------------------------------------------------------------------------------
 Spheres list:
 ISph  on   Nord    Re0     Alpha      Xe            Ye            Ze
    1   C      1    1.850   1.000     -1.342484     -0.175703     -0.000010
    2   C      2    1.850   1.000      0.145124      0.168210      0.000026
    3   O      3    1.520   1.000      0.999819     -0.915255     -0.000011
    4   N      4    1.890   1.000      0.552425      1.423113     -0.000007
    5   H      5    1.200   1.000     -2.002281      0.698155     -0.000449
    6   H      6    1.200   1.000     -1.586618     -0.788824     -0.875174
    7   H      7    1.200   1.000     -1.586802     -0.788059      0.875640
    8   H      8    1.200   1.000      0.494338     -1.716067      0.000023
 ------------------------------------------------------------------------------
 GePol: Number of generator spheres                  =       8
 GePol: Total number of spheres                      =       8
 GePol: Number of exposed spheres                    =       8 (100.00%)
 GePol: Number of points                             =     734
 GePol: Average weight of points                     =       0.13
 GePol: Minimum weight of points                     =   0.16D-08
 GePol: Maximum weight of points                     =    0.21991
 GePol: Number of points with low weight             =      15
 GePol: Fraction of low-weight points (<1% of avg)   =       2.04%
 GePol: Cavity surface area                          =     92.893 Ang**2
 GePol: Cavity volume                                =     68.811 Ang**3
 ------------------------------------------------------------------------------
 Atomic radii for non-electrostatic terms: SMD-CDS.
 ------------------------------------------------------------------------------
 PCM non-electrostatic energy =         0.0014370029 Hartrees.
 Nuclear repulsion after PCM non-electrostatic terms =      110.7129590352 Hartrees.
 Leave Link  301 at Tue May  2 09:23:11 2023, MaxMem=   33554432 cpu:       0.5
 (Enter /local/share/g09/linda-exe/l302.exel)
 NPDir=0 NMtPBC=     1 NCelOv=     1 NCel=       1 NClECP=     1 NCelD=      1
         NCelK=      1 NCelE2=     1 NClLst=     1 CellRange=     0.0.
 One-electron integrals computed using PRISM.
 NBasis=    80 RedAO= T  NBF=    80
 NBsUse=    80 1.00D-06 NBFU=    80
 Precomputing XC quadrature grid using
 IXCGrd= 2 IRadAn=           5 IRanWt=          -1 IRanGd=           0 AccXCQ= 0.00D+00.
 NRdTot=     650 NPtTot=      173334 NUsed=      178001 NTot=      178033
 NSgBfM=    80    80    80    80    80 NAtAll=     8     8.
 Leave Link  302 at Tue May  2 09:23:13 2023, MaxMem=   33554432 cpu:       1.9
 (Enter /local/share/g09/l303.exe)
 DipDrv:  MaxL=1.
 Leave Link  303 at Tue May  2 09:23:14 2023, MaxMem=   33554432 cpu:       0.5
 (Enter /local/share/g09/linda-exe/l401.exel)
 Harris functional with IExCor= 1009 diagonalized for initial guess.
 ExpMin= 1.61D-01 ExpMax= 5.48D+03 ExpMxC= 8.25D+02 IAcc=3 IRadAn=         5 AccDes= 0.00D+00
 HarFok:  IExCor= 1009 AccDes= 0.00D+00 IRadAn=         5 IDoV= 1
 ScaDFX=  1.000000  1.000000  1.000000  1.000000
 FoFCou: FMM=F IPFlag=           0 FMFlag=      100000 FMFlg1=           0
         NFxFlg=           0 DoJE=T BraDBF=F KetDBF=T FulRan=T
         Omega=  0.000000  0.000000  1.000000  0.000000  0.000000 ICntrl=     500 IOpCl=  0
         NMat0=    1 NMatS0=    1 NMatT0=    0 NMatD0=    1 NMtDS0=    0 NMtDT0=    0
         I1Cent=           4 NGrid=           0.
 Petite list used in FoFCou.
 Harris En= -208.571044807887    
 Initial guess orbital symmetries:
 Alpha Orbitals:
       Occupied  (A) (A) (A) (A) (A) (A) (A) (A) (A) (A) (A) (A)
                 (A) (A) (A) (A)
       Virtual   (A) (A) (A) (A) (A) (A) (A) (A) (A) (A) (A) (A)
                 (A) (A) (A) (A) (A) (A) (A) (A) (A) (A) (A) (A)
                 (A) (A) (A) (A) (A) (A) (A) (A) (A) (A) (A) (A)
                 (A) (A) (A) (A) (A) (A) (A) (A) (A) (A) (A) (A)
                 (A) (A) (A) (A) (A) (A) (A) (A) (A) (A) (A) (A)
                 (A) (A) (A) (A)
 Beta  Orbitals:
       Occupied  (A) (A) (A) (A) (A) (A) (A) (A) (A) (A) (A) (A)
                 (A) (A) (A) (A)
       Virtual   (A) (A) (A) (A) (A) (A) (A) (A) (A) (A) (A) (A)
                 (A) (A) (A) (A) (A) (A) (A) (A) (A) (A) (A) (A)
                 (A) (A) (A) (A) (A) (A) (A) (A) (A) (A) (A) (A)
                 (A) (A) (A) (A) (A) (A) (A) (A) (A) (A) (A) (A)
                 (A) (A) (A) (A) (A) (A) (A) (A) (A) (A) (A) (A)
                 (A) (A) (A) (A)
 The electronic state of the initial guess is 1-A.
 Initial guess <Sx>= 0.0000 <Sy>= 0.0000 <Sz>= 0.0000 <S**2>= 0.0000 S= 0.0000
 Leave Link  401 at Tue May  2 09:23:19 2023, MaxMem=   33554432 cpu:       4.4
 (Enter /local/share/g09/linda-exe/l502.exel)
 UHF open shell SCF:
 Requested convergence on RMS density matrix=1.00D-08 within 200 cycles.
 Requested convergence on MAX density matrix=1.00D-06.
 Requested convergence on             energy=1.00D-06.
 No special actions if energy rises.
 Using DIIS extrapolation, IDIIS=  1040.
 Integral symmetry usage will be decided dynamically.
       177916 words used for storage of precomputed grid.
 Keep J ints in memory in canonical form, NReq=9047291.
 IEnd=      240322 IEndB=      240322 NGot=    33554432 MDV=    28110543
 LenX=    28110543 LenY=    28103702
 Symmetry not used in FoFDir.
 MinBra= 0 MaxBra= 2 Meth= 1.
 IRaf=       0 NMat=   1 IRICut=       1 DoRegI=T DoRafI=F ISym2E= 0 JSym2E=0.

 Cycle   1  Pass 1  IDiag  1:
 E= -208.423685662562    
 DIIS: error= 4.36D-02 at cycle   1 NSaved=   1.
 NSaved= 1 IEnMin= 1 EnMin= -208.423685662562     IErMin= 1 ErrMin= 4.36D-02
 ErrMax= 4.36D-02 EMaxC= 1.00D-01 BMatC= 8.85D-01 BMatP= 8.85D-01
 IDIUse=3 WtCom= 5.64D-01 WtEn= 4.36D-01
 Coeff-Com:  0.100D+01
 Coeff-En:   0.100D+01
 Coeff:      0.100D+01
 Gap=     0.045 Goal=   None    Shift=    0.000
 Gap=     0.045 Goal=   None    Shift=    0.000
 GapD=    0.045 DampG=0.250 DampE=0.500 DampFc=0.2500 IDamp=-1.
 Damping current iteration by 2.50D-01
 RMSDP=1.82D-02 MaxDP=3.33D-01              OVMax= 4.03D-01

 Cycle   2  Pass 1  IDiag  1:
 E= -208.494030517109     Delta-E=       -0.070344854547 Rises=F Damp=T
 DIIS: error= 2.10D-02 at cycle   2 NSaved=   2.
 NSaved= 2 IEnMin= 2 EnMin= -208.494030517109     IErMin= 2 ErrMin= 2.10D-02
 ErrMax= 2.10D-02 EMaxC= 1.00D-01 BMatC= 1.82D-01 BMatP= 8.85D-01
 IDIUse=3 WtCom= 7.90D-01 WtEn= 2.10D-01
 Coeff-Com: -0.512D+00 0.151D+01
 Coeff-En:   0.000D+00 0.100D+01
 Coeff:     -0.404D+00 0.140D+01
 Gap=     0.167 Goal=   None    Shift=    0.000
 Gap=     0.167 Goal=   None    Shift=    0.000
 RMSDP=4.82D-03 MaxDP=6.45D-02 DE=-7.03D-02 OVMax= 3.53D-01

 Cycle   3  Pass 1  IDiag  1:
 E= -208.584987549735     Delta-E=       -0.090957032626 Rises=F Damp=F
 DIIS: error= 1.98D-02 at cycle   3 NSaved=   3.
 NSaved= 3 IEnMin= 3 EnMin= -208.584987549735     IErMin= 3 ErrMin= 1.98D-02
 ErrMax= 1.98D-02 EMaxC= 1.00D-01 BMatC= 1.57D-01 BMatP= 1.82D-01
 IDIUse=3 WtCom= 8.02D-01 WtEn= 1.98D-01
 Coeff-Com: -0.355D+00 0.929D+00 0.426D+00
 Coeff-En:   0.000D+00 0.000D+00 0.100D+01
 Coeff:     -0.284D+00 0.745D+00 0.539D+00
 Gap=     0.138 Goal=   None    Shift=    0.000
 Gap=     0.138 Goal=   None    Shift=    0.000
 RMSDP=3.49D-03 MaxDP=6.12D-02 DE=-9.10D-02 OVMax= 1.41D-01

 Cycle   4  Pass 1  IDiag  1:
 E= -208.609655441775     Delta-E=       -0.024667892040 Rises=F Damp=F
 DIIS: error= 1.29D-02 at cycle   4 NSaved=   4.
 NSaved= 4 IEnMin= 4 EnMin= -208.609655441775     IErMin= 4 ErrMin= 1.29D-02
 ErrMax= 1.29D-02 EMaxC= 1.00D-01 BMatC= 5.69D-02 BMatP= 1.57D-01
 IDIUse=3 WtCom= 8.71D-01 WtEn= 1.29D-01
 Coeff-Com:  0.325D-01-0.162D-01 0.363D+00 0.621D+00
 Coeff-En:   0.000D+00 0.000D+00 0.305D+00 0.695D+00
 Coeff:      0.283D-01-0.141D-01 0.355D+00 0.631D+00
 Gap=     0.148 Goal=   None    Shift=    0.000
 Gap=     0.148 Goal=   None    Shift=    0.000
 RMSDP=1.36D-03 MaxDP=2.34D-02 DE=-2.47D-02 OVMax= 5.63D-02

 Cycle   5  Pass 1  IDiag  1:
 E= -208.622298772098     Delta-E=       -0.012643330323 Rises=F Damp=F
 DIIS: error= 1.34D-03 at cycle   5 NSaved=   5.
 NSaved= 5 IEnMin= 5 EnMin= -208.622298772098     IErMin= 5 ErrMin= 1.34D-03
 ErrMax= 1.34D-03 EMaxC= 1.00D-01 BMatC= 5.59D-04 BMatP= 5.69D-02
 IDIUse=3 WtCom= 9.87D-01 WtEn= 1.34D-02
 Coeff-Com:  0.139D-01-0.164D-01 0.149D+00 0.289D+00 0.565D+00
 Coeff-En:   0.000D+00 0.000D+00 0.000D+00 0.000D+00 0.100D+01
 Coeff:      0.137D-01-0.162D-01 0.147D+00 0.285D+00 0.571D+00
 Gap=     0.149 Goal=   None    Shift=    0.000
 Gap=     0.149 Goal=   None    Shift=    0.000
 RMSDP=1.68D-04 MaxDP=2.80D-03 DE=-1.26D-02 OVMax= 3.79D-03

 Cycle   6  Pass 1  IDiag  1:
 E= -208.622400638427     Delta-E=       -0.000101866329 Rises=F Damp=F
 DIIS: error= 4.60D-04 at cycle   6 NSaved=   6.
 NSaved= 6 IEnMin= 6 EnMin= -208.622400638427     IErMin= 6 ErrMin= 4.60D-04
 ErrMax= 4.60D-04 EMaxC= 1.00D-01 BMatC= 8.01D-05 BMatP= 5.59D-04
 IDIUse=3 WtCom= 9.95D-01 WtEn= 4.60D-03
 Coeff-Com: -0.186D-02 0.140D-02 0.193D-01 0.411D-01 0.314D+00 0.626D+00
 Coeff-En:   0.000D+00 0.000D+00 0.000D+00 0.000D+00 0.988D-01 0.901D+00
 Coeff:     -0.185D-02 0.139D-02 0.192D-01 0.409D-01 0.313D+00 0.627D+00
 Gap=     0.149 Goal=   None    Shift=    0.000
 Gap=     0.149 Goal=   None    Shift=    0.000
 RMSDP=4.74D-05 MaxDP=9.67D-04 DE=-1.02D-04 OVMax= 1.07D-03

 Cycle   7  Pass 1  IDiag  1:
 E= -208.622416035822     Delta-E=       -0.000015397395 Rises=F Damp=F
 DIIS: error= 5.12D-05 at cycle   7 NSaved=   7.
 NSaved= 7 IEnMin= 7 EnMin= -208.622416035822     IErMin= 7 ErrMin= 5.12D-05
 ErrMax= 5.12D-05 EMaxC= 1.00D-01 BMatC= 1.37D-06 BMatP= 8.01D-05
 IDIUse=1 WtCom= 1.00D+00 WtEn= 0.00D+00
 Coeff-Com: -0.172D-02 0.194D-02-0.195D-02-0.237D-02 0.696D-01 0.197D+00
 Coeff-Com:  0.738D+00
 Coeff:     -0.172D-02 0.194D-02-0.195D-02-0.237D-02 0.696D-01 0.197D+00
 Coeff:      0.738D+00
 Gap=     0.149 Goal=   None    Shift=    0.000
 Gap=     0.149 Goal=   None    Shift=    0.000
 RMSDP=1.03D-05 MaxDP=1.55D-04 DE=-1.54D-05 OVMax= 1.70D-04

 Cycle   8  Pass 1  IDiag  1:
 E= -208.622416301217     Delta-E=       -0.000000265395 Rises=F Damp=F
 DIIS: error= 2.25D-05 at cycle   8 NSaved=   8.
 NSaved= 8 IEnMin= 8 EnMin= -208.622416301217     IErMin= 8 ErrMin= 2.25D-05
 ErrMax= 2.25D-05 EMaxC= 1.00D-01 BMatC= 3.08D-07 BMatP= 1.37D-06
 IDIUse=1 WtCom= 1.00D+00 WtEn= 0.00D+00
 Coeff-Com: -0.628D-03 0.690D-03-0.243D-02-0.390D-02 0.899D-02 0.444D-01
 Coeff-Com:  0.368D+00 0.585D+00
 Coeff:     -0.628D-03 0.690D-03-0.243D-02-0.390D-02 0.899D-02 0.444D-01
 Coeff:      0.368D+00 0.585D+00
 Gap=     0.149 Goal=   None    Shift=    0.000
 Gap=     0.149 Goal=   None    Shift=    0.000
 RMSDP=4.35D-06 MaxDP=7.56D-05 DE=-2.65D-07 OVMax= 6.76D-05

 Cycle   9  Pass 1  IDiag  1:
 E= -208.622416377960     Delta-E=       -0.000000076743 Rises=F Damp=F
 DIIS: error= 2.86D-06 at cycle   9 NSaved=   9.
 NSaved= 9 IEnMin= 9 EnMin= -208.622416377960     IErMin= 9 ErrMin= 2.86D-06
 ErrMax= 2.86D-06 EMaxC= 1.00D-01 BMatC= 5.54D-09 BMatP= 3.08D-07
 IDIUse=1 WtCom= 1.00D+00 WtEn= 0.00D+00
 Coeff-Com: -0.315D-04 0.577D-04-0.499D-03-0.776D-03-0.335D-02-0.630D-02
 Coeff-Com:  0.277D-01 0.124D+00 0.859D+00
 Coeff:     -0.315D-04 0.577D-04-0.499D-03-0.776D-03-0.335D-02-0.630D-02
 Coeff:      0.277D-01 0.124D+00 0.859D+00
 Gap=     0.149 Goal=   None    Shift=    0.000
 Gap=     0.149 Goal=   None    Shift=    0.000
 RMSDP=7.79D-07 MaxDP=1.13D-05 DE=-7.67D-08 OVMax= 1.06D-05

 Cycle  10  Pass 1  IDiag  1:
 E= -208.622416379388     Delta-E=       -0.000000001428 Rises=F Damp=F
 DIIS: error= 5.52D-07 at cycle  10 NSaved=  10.
 NSaved=10 IEnMin=10 EnMin= -208.622416379388     IErMin=10 ErrMin= 5.52D-07
 ErrMax= 5.52D-07 EMaxC= 1.00D-01 BMatC= 1.17D-10 BMatP= 5.54D-09
 IDIUse=1 WtCom= 1.00D+00 WtEn= 0.00D+00
 Coeff-Com:  0.198D-04-0.219D-04-0.166D-05 0.639D-05-0.523D-03-0.199D-02
 Coeff-Com: -0.679D-02-0.425D-02 0.978D-01 0.916D+00
 Coeff:      0.198D-04-0.219D-04-0.166D-05 0.639D-05-0.523D-03-0.199D-02
 Coeff:     -0.679D-02-0.425D-02 0.978D-01 0.916D+00
 Gap=     0.149 Goal=   None    Shift=    0.000
 Gap=     0.149 Goal=   None    Shift=    0.000
 RMSDP=1.25D-07 MaxDP=2.12D-06 DE=-1.43D-09 OVMax= 1.71D-06

 Cycle  11  Pass 1  IDiag  1:
 E= -208.622416379417     Delta-E=       -0.000000000029 Rises=F Damp=F
 DIIS: error= 1.32D-07 at cycle  11 NSaved=  11.
 NSaved=11 IEnMin=11 EnMin= -208.622416379417     IErMin=11 ErrMin= 1.32D-07
 ErrMax= 1.32D-07 EMaxC= 1.00D-01 BMatC= 5.07D-12 BMatP= 1.17D-10
 IDIUse=1 WtCom= 1.00D+00 WtEn= 0.00D+00
 Coeff-Com:  0.373D-05-0.438D-05 0.113D-04 0.184D-04 0.260D-04-0.161D-03
 Coeff-Com: -0.165D-02-0.410D-02-0.808D-02 0.186D+00 0.828D+00
 Coeff:      0.373D-05-0.438D-05 0.113D-04 0.184D-04 0.260D-04-0.161D-03
 Coeff:     -0.165D-02-0.410D-02-0.808D-02 0.186D+00 0.828D+00
 Gap=     0.149 Goal=   None    Shift=    0.000
 Gap=     0.149 Goal=   None    Shift=    0.000
 RMSDP=2.38D-08 MaxDP=5.77D-07 DE=-2.90D-11 OVMax= 4.11D-07

 Cycle  12  Pass 1  IDiag  1:
 E= -208.622416379420     Delta-E=       -0.000000000002 Rises=F Damp=F
 DIIS: error= 1.77D-08 at cycle  12 NSaved=  12.
 NSaved=12 IEnMin=12 EnMin= -208.622416379420     IErMin=12 ErrMin= 1.77D-08
 ErrMax= 1.77D-08 EMaxC= 1.00D-01 BMatC= 8.74D-14 BMatP= 5.07D-12
 IDIUse=1 WtCom= 1.00D+00 WtEn= 0.00D+00
 Coeff-Com: -0.159D-06 0.875D-07 0.483D-06 0.123D-05 0.111D-04 0.317D-04
 Coeff-Com:  0.849D-04-0.875D-04-0.235D-02-0.163D-01 0.234D-01 0.995D+00
 Coeff:     -0.159D-06 0.875D-07 0.483D-06 0.123D-05 0.111D-04 0.317D-04
 Coeff:      0.849D-04-0.875D-04-0.235D-02-0.163D-01 0.234D-01 0.995D+00
 Gap=     0.149 Goal=   None    Shift=    0.000
 Gap=     0.149 Goal=   None    Shift=    0.000
 RMSDP=6.36D-09 MaxDP=1.71D-07 DE=-2.44D-12 OVMax= 7.76D-08

 Error on total polarization charges =  0.02541
 SCF Done:  E(UM06L) =  -208.622416379     A.U. after   12 cycles
             Convg  =    0.6362D-08             -V/T =  2.0080
 <Sx>= 0.0000 <Sy>= 0.0000 <Sz>= 0.0000 <S**2>= 0.0000 S= 0.0000
 <L.S>= 0.000000000000E+00
 KE= 2.069625052052D+02 PE=-7.174433784782D+02 EE= 1.911454978584D+02
 SMD-CDS (non-electrostatic) energy       (kcal/mol) =       0.90
 (included in total energy above)
 Annihilation of the first spin contaminant:
 S**2 before annihilation     0.0000,   after     0.0000
 Leave Link  502 at Tue May  2 09:24:46 2023, MaxMem=   33554432 cpu:      85.9
 (Enter /local/share/g09/l601.exe)
 Copying SCF densities to generalized density rwf, IOpCl= 1 IROHF=0.

 **********************************************************************

            Population analysis using the SCF density.

 **********************************************************************

 Orbital symmetries:
 Alpha Orbitals:
       Occupied  (A) (A) (A) (A) (A) (A) (A) (A) (A) (A) (A) (A)
                 (A) (A) (A) (A)
       Virtual   (A) (A) (A) (A) (A) (A) (A) (A) (A) (A) (A) (A)
                 (A) (A) (A) (A) (A) (A) (A) (A) (A) (A) (A) (A)
                 (A) (A) (A) (A) (A) (A) (A) (A) (A) (A) (A) (A)
                 (A) (A) (A) (A) (A) (A) (A) (A) (A) (A) (A) (A)
                 (A) (A) (A) (A) (A) (A) (A) (A) (A) (A) (A) (A)
                 (A) (A) (A) (A)
 Beta  Orbitals:
       Occupied  (A) (A) (A) (A) (A) (A) (A) (A) (A) (A) (A) (A)
                 (A) (A) (A) (A)
       Virtual   (A) (A) (A) (A) (A) (A) (A) (A) (A) (A) (A) (A)
                 (A) (A) (A) (A) (A) (A) (A) (A) (A) (A) (A) (A)
                 (A) (A) (A) (A) (A) (A) (A) (A) (A) (A) (A) (A)
                 (A) (A) (A) (A) (A) (A) (A) (A) (A) (A) (A) (A)
                 (A) (A) (A) (A) (A) (A) (A) (A) (A) (A) (A) (A)
                 (A) (A) (A) (A)
 The electronic state is 1-A.
 Alpha  occ. eigenvalues --  -18.96578 -14.03594 -10.06980 -10.02914  -0.98595
 Alpha  occ. eigenvalues --   -0.70897  -0.62972  -0.48955  -0.40902  -0.36055
 Alpha  occ. eigenvalues --   -0.34502  -0.29162  -0.28938  -0.20725  -0.14959
 Alpha  occ. eigenvalues --   -0.07351
 Alpha virt. eigenvalues --    0.07514   0.11586   0.16487   0.18251   0.19136
 Alpha virt. eigenvalues --    0.23372   0.34369   0.41487   0.58129   0.58931
 Alpha virt. eigenvalues --    0.63377   0.65037   0.67183   0.69827   0.76366
 Alpha virt. eigenvalues --    0.81571   0.83092   0.83319   0.86363   0.89507
 Alpha virt. eigenvalues --    0.90982   0.93637   0.98905   1.03645   1.13402
 Alpha virt. eigenvalues --    1.31807   1.34285   1.39924   1.43823   1.44955
 Alpha virt. eigenvalues --    1.61028   1.73089   1.78588   1.79266   1.84487
 Alpha virt. eigenvalues --    1.91781   1.91810   2.03640   2.03960   2.06018
 Alpha virt. eigenvalues --    2.09924   2.24622   2.25249   2.36178   2.45963
 Alpha virt. eigenvalues --    2.51858   2.54843   2.60068   2.64129   2.76764
 Alpha virt. eigenvalues --    2.78197   2.85463   2.88713   2.94653   3.07649
 Alpha virt. eigenvalues --    3.20680   3.31541   3.52689   3.53946   3.61524
 Alpha virt. eigenvalues --    3.93394   4.14579   4.34823   4.69493
  Beta  occ. eigenvalues --  -18.96578 -14.03594 -10.06980 -10.02914  -0.98595
  Beta  occ. eigenvalues --   -0.70897  -0.62972  -0.48955  -0.40902  -0.36055
  Beta  occ. eigenvalues --   -0.34502  -0.29162  -0.28938  -0.20725  -0.14959
  Beta  occ. eigenvalues --   -0.07351
  Beta virt. eigenvalues --    0.07514   0.11586   0.16487   0.18251   0.19136
  Beta virt. eigenvalues --    0.23372   0.34369   0.41487   0.58129   0.58931
  Beta virt. eigenvalues --    0.63377   0.65037   0.67183   0.69827   0.76366
  Beta virt. eigenvalues --    0.81571   0.83092   0.83319   0.86363   0.89507
  Beta virt. eigenvalues --    0.90982   0.93637   0.98905   1.03645   1.13402
  Beta virt. eigenvalues --    1.31807   1.34285   1.39924   1.43823   1.44955
  Beta virt. eigenvalues --    1.61028   1.73089   1.78588   1.79266   1.84487
  Beta virt. eigenvalues --    1.91781   1.91810   2.03640   2.03960   2.06018
  Beta virt. eigenvalues --    2.09924   2.24622   2.25249   2.36178   2.45963
  Beta virt. eigenvalues --    2.51858   2.54843   2.60068   2.64129   2.76764
  Beta virt. eigenvalues --    2.78197   2.85463   2.88713   2.94653   3.07649
  Beta virt. eigenvalues --    3.20680   3.31541   3.52689   3.53946   3.61524
  Beta virt. eigenvalues --    3.93394   4.14579   4.34823   4.69493
     Alpha Molecular Orbital Coefficients:
                           1         2         3         4         5
                           O         O         O         O         O
     Eigenvalues --   -18.96578 -14.03594 -10.06980 -10.02914  -0.98595
   1 1   C  1S          0.00000  -0.00003   0.00144   0.99440  -0.01289
   2        2S          0.00008  -0.00009  -0.00019   0.04004   0.02468
   3        2PX        -0.00004  -0.00003  -0.00040  -0.00039   0.01893
   4        2PY         0.00002  -0.00001  -0.00010  -0.00022  -0.00242
   5        2PZ         0.00000   0.00000   0.00000   0.00000   0.00000
   6        3S         -0.00042   0.00072   0.00536  -0.02021  -0.00387
   7        3PX        -0.00016   0.00050   0.00267  -0.00140  -0.00103
   8        3PY        -0.00010  -0.00051   0.00118  -0.00002  -0.01171
   9        3PZ         0.00000   0.00000   0.00000   0.00000   0.00000
  10        4XX        -0.00009   0.00002  -0.00079  -0.00443   0.00548
  11        4YY        -0.00002  -0.00008  -0.00026  -0.00408  -0.00033
  12        4ZZ        -0.00001  -0.00008  -0.00026  -0.00410  -0.00004
  13        4XY         0.00004  -0.00011  -0.00006  -0.00018  -0.00079
  14        4XZ         0.00000   0.00000   0.00000   0.00000   0.00000
  15        4YZ         0.00000   0.00000   0.00000   0.00000   0.00000
  16 2   C  1S          0.00000   0.00001   0.99420  -0.00170  -0.07060
  17        2S          0.00024   0.00024   0.03872  -0.00025   0.12903
  18        2PX         0.00022  -0.00017   0.00046   0.00025   0.05744
  19        2PY        -0.00020  -0.00036  -0.00145   0.00007  -0.08530
  20        2PZ         0.00000   0.00000   0.00000   0.00000   0.00000
  21        3S         -0.00043   0.00193  -0.01101   0.00429   0.03439
  22        3PX        -0.00069   0.00081   0.00436  -0.00364  -0.03057
  23        3PY        -0.00029   0.00250  -0.00024  -0.00030   0.01076
  24        3PZ         0.00000   0.00000   0.00000   0.00000   0.00000
  25        4XX         0.00002  -0.00010  -0.00475  -0.00077   0.00096
  26        4YY        -0.00003  -0.00084  -0.00403  -0.00028   0.01468
  27        4ZZ        -0.00004  -0.00007  -0.00526  -0.00019  -0.00845
  28        4XY        -0.00001  -0.00026  -0.00028  -0.00008  -0.01470
  29        4XZ         0.00000   0.00000   0.00000   0.00000   0.00000
  30        4YZ         0.00000   0.00000   0.00000   0.00000   0.00000
  31 3   O  1S          0.99367  -0.00005   0.00004  -0.00007  -0.20622
  32        2S          0.02493  -0.00021   0.00046  -0.00036   0.46111
  33        2PX        -0.00099   0.00005   0.00023   0.00007  -0.10298
  34        2PY        -0.00036  -0.00003  -0.00015  -0.00007  -0.00241
  35        2PZ         0.00000   0.00000   0.00000   0.00000   0.00001
  36        3S          0.00582   0.00103  -0.00186   0.00130   0.43824
  37        3PX         0.00027  -0.00054   0.00099  -0.00018  -0.04369
  38        3PY        -0.00008  -0.00002  -0.00192   0.00078   0.01505
  39        3PZ         0.00000   0.00000   0.00000   0.00000   0.00000
  40        4XX        -0.00563   0.00002  -0.00026  -0.00013   0.00591
  41        4YY        -0.00546  -0.00020  -0.00057  -0.00011   0.00433
  42        4ZZ        -0.00563  -0.00021   0.00057  -0.00034  -0.00413
  43        4XY         0.00026  -0.00005   0.00082  -0.00010  -0.00584
  44        4XZ         0.00000   0.00000   0.00000   0.00000   0.00000
  45        4YZ         0.00000   0.00000   0.00000   0.00000   0.00000
  46 4   N  1S         -0.00001   0.99402  -0.00017  -0.00005  -0.01293
  47        2S         -0.00002   0.03059  -0.00040  -0.00022   0.02634
  48        2PX         0.00000  -0.00038   0.00018   0.00005  -0.00098
  49        2PY         0.00000  -0.00141   0.00052   0.00003  -0.01930
  50        2PZ         0.00000   0.00000   0.00000   0.00000   0.00000
  51        3S          0.00057  -0.00359   0.00151   0.00078   0.02020
  52        3PX        -0.00002   0.00057  -0.00083   0.00029   0.00795
  53        3PY        -0.00021   0.00185   0.00020  -0.00050  -0.00912
  54        3PZ         0.00000   0.00000   0.00000   0.00000   0.00000
  55        4XX        -0.00003  -0.00492  -0.00009  -0.00010  -0.00188
  56        4YY        -0.00006  -0.00464  -0.00058   0.00005   0.00403
  57        4ZZ        -0.00002  -0.00503  -0.00003  -0.00023  -0.00007
  58        4XY         0.00003   0.00013   0.00001  -0.00003  -0.00159
  59        4XZ         0.00000   0.00000   0.00000   0.00000   0.00000
  60        4YZ         0.00000   0.00000   0.00000   0.00000   0.00000
  61 5   H  1S          0.00004  -0.00001  -0.00018  -0.00058   0.00403
  62        2S          0.00004   0.00026  -0.00011   0.00295   0.00369
  63        3PX         0.00001  -0.00003   0.00001  -0.00024   0.00016
  64        3PY        -0.00002   0.00000  -0.00008   0.00043  -0.00008
  65        3PZ         0.00000   0.00000   0.00000   0.00000   0.00000
  66 6   H  1S          0.00000  -0.00002  -0.00021  -0.00048   0.00553
  67        2S          0.00001  -0.00013   0.00048   0.00316   0.00056
  68        3PX         0.00000   0.00000   0.00005  -0.00004   0.00085
  69        3PY         0.00000   0.00003   0.00003  -0.00027   0.00040
  70        3PZ         0.00000   0.00000   0.00008  -0.00040   0.00039
  71 7   H  1S          0.00000  -0.00002  -0.00021  -0.00048   0.00553
  72        2S          0.00001  -0.00013   0.00048   0.00316   0.00056
  73        3PX         0.00000   0.00000   0.00005  -0.00004   0.00084
  74        3PY         0.00000   0.00003   0.00003  -0.00027   0.00040
  75        3PZ         0.00000   0.00000  -0.00008   0.00040  -0.00039
  76 8   H  1S         -0.00011  -0.00009   0.00008   0.00002   0.14299
  77        2S         -0.00067   0.00000   0.00001   0.00042   0.00542
  78        3PX        -0.00026   0.00003  -0.00020  -0.00002   0.01093
  79        3PY        -0.00044   0.00000   0.00022   0.00008   0.02132
  80        3PZ         0.00000   0.00000   0.00000   0.00000   0.00000
                           6         7         8         9        10
                           O         O         O         O         O
     Eigenvalues --    -0.70897  -0.62972  -0.48955  -0.40902  -0.36055
   1 1   C  1S         -0.09936  -0.16359   0.01609   0.02866   0.00000
   2        2S          0.18939   0.31042  -0.02785  -0.05495   0.00000
   3        2PX         0.04362  -0.02075   0.07164   0.29959   0.00000
   4        2PY         0.01880  -0.02943  -0.02679  -0.00357   0.00005
   5        2PZ         0.00000   0.00001   0.00000   0.00001   0.37474
   6        3S          0.14866   0.31252  -0.05524  -0.06571   0.00000
   7        3PX        -0.00146  -0.00223   0.01408   0.13852   0.00000
   8        3PY         0.00617  -0.01703  -0.01581  -0.01503   0.00001
   9        3PZ         0.00000   0.00001   0.00000   0.00001   0.17509
  10        4XX         0.00737  -0.00003   0.00698   0.01331   0.00000
  11        4YY        -0.00009  -0.00018  -0.00392  -0.00604  -0.00001
  12        4ZZ        -0.00075   0.00111   0.00003  -0.00420   0.00001
  13        4XY         0.00342  -0.00300  -0.00115   0.00454   0.00000
  14        4XZ         0.00000   0.00000   0.00000   0.00000  -0.00022
  15        4YZ         0.00000   0.00000   0.00000   0.00000  -0.01384
  16 2   C  1S         -0.13289   0.02628  -0.07148  -0.07357   0.00000
  17        2S          0.26241  -0.05101   0.15279   0.16052   0.00001
  18        2PX        -0.02430  -0.15112   0.09642  -0.22301  -0.00002
  19        2PY         0.11650  -0.13410  -0.23537  -0.08037   0.00001
  20        2PZ         0.00000   0.00000   0.00000   0.00001   0.19748
  21        3S          0.15543  -0.03719   0.13591   0.12704   0.00002
  22        3PX        -0.01619  -0.01048  -0.00959  -0.07605   0.00000
  23        3PY        -0.01432  -0.02101  -0.04578  -0.03805   0.00001
  24        3PZ         0.00000   0.00000   0.00000   0.00000   0.09780
  25        4XX         0.00361   0.01231   0.00851  -0.00745   0.00000
  26        4YY         0.00516  -0.00768  -0.00697   0.00611   0.00000
  27        4ZZ        -0.00736   0.00238  -0.00647  -0.00036   0.00000
  28        4XY         0.01136   0.00177  -0.01905   0.01137   0.00000
  29        4XZ         0.00000   0.00000   0.00000   0.00000  -0.00502
  30        4YZ         0.00000   0.00000   0.00000   0.00000  -0.00776
  31 3   O  1S          0.05022   0.00850   0.01070   0.05897   0.00000
  32        2S         -0.11265  -0.01955  -0.01883  -0.13504   0.00001
  33        2PX        -0.00664  -0.03447  -0.06309  -0.27731   0.00004
  34        2PY         0.10268  -0.06004   0.45343  -0.16790  -0.00001
  35        2PZ         0.00000   0.00000   0.00000   0.00001   0.19671
  36        3S         -0.14319  -0.02866  -0.03280  -0.22600   0.00002
  37        3PX        -0.00078  -0.01853  -0.03522  -0.18487   0.00003
  38        3PY         0.04423  -0.03167   0.24246  -0.09098   0.00000
  39        3PZ         0.00000   0.00000   0.00000   0.00001   0.13828
  40        4XX         0.00297   0.00470   0.00725   0.02168   0.00000
  41        4YY         0.00377  -0.00415  -0.00199  -0.00299   0.00000
  42        4ZZ         0.00107  -0.00031   0.00235  -0.00294   0.00000
  43        4XY        -0.00639   0.00273  -0.02211   0.00461   0.00000
  44        4XZ         0.00000   0.00000   0.00000   0.00000  -0.01189
  45        4YZ         0.00000   0.00000   0.00000   0.00000   0.00298
  46 4   N  1S         -0.13193   0.10767   0.08688   0.02479   0.00001
  47        2S          0.26698  -0.22045  -0.17864  -0.05228  -0.00001
  48        2PX        -0.04375   0.00825   0.03391  -0.05122  -0.00001
  49        2PY        -0.11343   0.07991   0.00127   0.00217   0.00000
  50        2PZ         0.00000   0.00000   0.00000   0.00000   0.06521
  51        3S          0.27552  -0.23422  -0.22994  -0.05990  -0.00003
  52        3PX        -0.01420  -0.00183   0.01966  -0.03237   0.00000
  53        3PY        -0.03899   0.02466  -0.00979  -0.00963   0.00000
  54        3PZ         0.00000   0.00000   0.00000   0.00000   0.03510
  55        4XX        -0.00469   0.00608   0.00154   0.00293   0.00000
  56        4YY         0.00615  -0.00473   0.00778  -0.00108   0.00000
  57        4ZZ        -0.00484   0.00358   0.00247   0.00076   0.00000
  58        4XY         0.00625  -0.00040  -0.00345   0.00639   0.00000
  59        4XZ         0.00000   0.00000   0.00000   0.00000  -0.00262
  60        4YZ         0.00000   0.00000   0.00000   0.00000  -0.00743
  61 5   H  1S          0.05834   0.10746  -0.04508  -0.13352  -0.00007
  62        2S          0.01205   0.03546  -0.02827  -0.08205  -0.00005
  63        3PX         0.00426   0.00413  -0.00132   0.00156   0.00000
  64        3PY        -0.00334  -0.00784   0.00196   0.00745   0.00001
  65        3PZ         0.00000   0.00000   0.00000   0.00000   0.00983
  66 6   H  1S          0.05507   0.12116  -0.01526  -0.06506  -0.19868
  67        2S          0.01183   0.03725  -0.00997  -0.04430  -0.17247
  68        3PX         0.00162   0.00219   0.00151   0.00635  -0.00420
  69        3PY         0.00292   0.00533  -0.00076  -0.00268  -0.00724
  70        3PZ         0.00386   0.00821  -0.00099  -0.00377  -0.00085
  71 7   H  1S          0.05508   0.12116  -0.01527  -0.06509   0.19875
  72        2S          0.01183   0.03724  -0.00996  -0.04432   0.17251
  73        3PX         0.00162   0.00219   0.00151   0.00635   0.00420
  74        3PY         0.00292   0.00532  -0.00076  -0.00267   0.00724
  75        3PZ        -0.00387  -0.00821   0.00099   0.00378  -0.00086
  76 8   H  1S         -0.07207   0.03219  -0.21272   0.12647   0.00000
  77        2S         -0.01711   0.00670  -0.09227   0.05757   0.00000
  78        3PX        -0.00620  -0.00005  -0.01531  -0.00155   0.00000
  79        3PY        -0.00719   0.00231  -0.00767   0.00688   0.00000
  80        3PZ         0.00000   0.00000   0.00000   0.00000   0.00689
                          11        12        13        14        15
                           O         O         O         O         O
     Eigenvalues --    -0.34502  -0.29162  -0.28938  -0.20725  -0.14959
   1 1   C  1S         -0.00610  -0.01697  -0.00004  -0.01861   0.00000
   2        2S          0.01948   0.03830   0.00009   0.03575   0.00000
   3        2PX         0.03810   0.24933   0.00056   0.13115   0.00000
   4        2PY         0.40893  -0.10901  -0.00025   0.04956   0.00001
   5        2PZ        -0.00005   0.00046  -0.20852   0.00000  -0.04819
   6        3S          0.01550   0.08488   0.00020   0.11699  -0.00002
   7        3PX         0.00329   0.12529   0.00028   0.13531  -0.00001
   8        3PY         0.21552  -0.01903  -0.00006   0.01029   0.00006
   9        3PZ        -0.00003   0.00025  -0.12103   0.00001   0.02032
  10        4XX         0.01100   0.00207   0.00000   0.00452   0.00000
  11        4YY         0.00118  -0.00300   0.00000  -0.00358   0.00000
  12        4ZZ        -0.01169   0.00334   0.00000  -0.00268   0.00000
  13        4XY        -0.00769   0.01302   0.00003  -0.00556   0.00000
  14        4XZ         0.00000  -0.00002   0.01043   0.00000   0.01221
  15        4YZ        -0.00001  -0.00002   0.01022   0.00000   0.00925
  16 2   C  1S         -0.02933  -0.01953  -0.00005   0.05962   0.00000
  17        2S          0.06738   0.04261   0.00011  -0.13977   0.00000
  18        2PX        -0.12942  -0.20546  -0.00046  -0.17581  -0.00001
  19        2PY         0.03245   0.10988   0.00025  -0.26022  -0.00001
  20        2PZ        -0.00003  -0.00043   0.19112   0.00000   0.31422
  21        3S          0.07120   0.08412   0.00020  -0.12366   0.00001
  22        3PX        -0.03237  -0.01755  -0.00004   0.00402   0.00000
  23        3PY        -0.02312   0.01600   0.00004  -0.00744  -0.00002
  24        3PZ        -0.00001  -0.00030   0.13242  -0.00001   0.22564
  25        4XX         0.00941   0.01415   0.00003   0.01021   0.00000
  26        4YY        -0.01125  -0.01934  -0.00004   0.01004   0.00000
  27        4ZZ         0.00049   0.00383   0.00001  -0.00251   0.00000
  28        4XY        -0.01221   0.01093   0.00002  -0.00374   0.00000
  29        4XZ         0.00000  -0.00004   0.01770   0.00000   0.00074
  30        4YZ         0.00000   0.00002  -0.01043   0.00000   0.03026
  31 3   O  1S         -0.01725  -0.04268  -0.00009  -0.02263   0.00000
  32        2S          0.04188   0.08430   0.00018   0.04942   0.00001
  33        2PX         0.09043   0.47167   0.00108   0.06062  -0.00001
  34        2PY         0.00011  -0.03549  -0.00008   0.09445   0.00001
  35        2PZ        -0.00003  -0.00115   0.50202   0.00002  -0.30927
  36        3S          0.05811   0.18305   0.00041   0.12594   0.00001
  37        3PX         0.06895   0.34709   0.00080   0.03679  -0.00001
  38        3PY        -0.00669  -0.03887  -0.00008   0.05011   0.00000
  39        3PZ        -0.00002  -0.00085   0.37351   0.00002  -0.27846
  40        4XX        -0.00503  -0.02502  -0.00006   0.00200   0.00000
  41        4YY        -0.00025  -0.00236  -0.00001  -0.01347   0.00000
  42        4ZZ         0.00156   0.00043   0.00000  -0.00026   0.00000
  43        4XY        -0.00202  -0.00294  -0.00001  -0.00429   0.00000
  44        4XZ         0.00000   0.00005  -0.02150   0.00000   0.00739
  45        4YZ         0.00000  -0.00001   0.00298   0.00000   0.01042
  46 4   N  1S          0.05138   0.03509   0.00008  -0.08971   0.00000
  47        2S         -0.10908  -0.06983  -0.00016   0.17057   0.00000
  48        2PX        -0.07012  -0.06843  -0.00016   0.08528   0.00000
  49        2PY        -0.02392  -0.04798  -0.00011   0.43163   0.00003
  50        2PZ        -0.00001  -0.00019   0.08418  -0.00002   0.40387
  51        3S         -0.15756  -0.15005  -0.00035   0.38464   0.00002
  52        3PX        -0.04921  -0.04208  -0.00010   0.06089  -0.00001
  53        3PY        -0.02155  -0.02347  -0.00006   0.33491   0.00002
  54        3PZ        -0.00001  -0.00010   0.04724  -0.00002   0.33588
  55        4XX         0.00677   0.00698   0.00002  -0.00392   0.00000
  56        4YY         0.00263   0.00238   0.00001  -0.03611   0.00000
  57        4ZZ        -0.00003   0.00082   0.00000  -0.00182   0.00000
  58        4XY         0.00671   0.00799   0.00002  -0.00660   0.00000
  59        4XZ         0.00000   0.00000  -0.00085   0.00000  -0.00858
  60        4YZ         0.00000   0.00002  -0.00838   0.00000  -0.02406
  61 5   H  1S          0.21409  -0.16598  -0.00031   0.00374   0.00003
  62        2S          0.16469  -0.18141  -0.00034   0.04514   0.00002
  63        3PX         0.00841   0.00150   0.00001   0.00343   0.00000
  64        3PY        -0.00026   0.00525   0.00001   0.00181   0.00000
  65        3PZ         0.00000   0.00001  -0.00571   0.00000  -0.00160
  66 6   H  1S         -0.15330   0.02601   0.12909  -0.03324   0.06237
  67        2S         -0.12899   0.02167   0.10973  -0.05057   0.13023
  68        3PX        -0.00144   0.00554  -0.00016   0.00282  -0.00044
  69        3PY         0.00480  -0.00235   0.00385   0.00138   0.00097
  70        3PZ        -0.00792   0.00111   0.00024  -0.00142   0.00044
  71 7   H  1S         -0.15316   0.02649  -0.12903  -0.03322  -0.06240
  72        2S         -0.12886   0.02207  -0.10972  -0.05054  -0.13023
  73        3PX        -0.00144   0.00554   0.00018   0.00282   0.00044
  74        3PY         0.00481  -0.00233  -0.00385   0.00138  -0.00097
  75        3PZ         0.00791  -0.00110   0.00024   0.00142   0.00044
  76 8   H  1S         -0.02924  -0.10213  -0.00023  -0.07512  -0.00001
  77        2S         -0.02603  -0.04759  -0.00010  -0.07198  -0.00001
  78        3PX         0.00388   0.00747   0.00002  -0.00250   0.00000
  79        3PY        -0.00140  -0.00859  -0.00002   0.00092   0.00000
  80        3PZ         0.00000  -0.00004   0.01555   0.00000  -0.01077
                          16        17        18        19        20
                           O         V         V         V         V
     Eigenvalues --    -0.07351   0.07514   0.11586   0.16487   0.18251
   1 1   C  1S         -0.03354  -0.00002  -0.10129  -0.06915   0.08659
   2        2S          0.06826   0.00003   0.15472   0.07815  -0.12642
   3        2PX         0.11993  -0.00001  -0.13217  -0.03573   0.15929
   4        2PY         0.07907   0.00001  -0.04260  -0.31853  -0.27102
   5        2PZ        -0.00001  -0.06945  -0.00001   0.00011  -0.00093
   6        3S          0.27900   0.00023   1.41661   1.26026  -1.43795
   7        3PX         0.09980  -0.00009  -0.48250   0.09002   0.22990
   8        3PY         0.06753   0.00007  -0.08463  -1.02418  -0.71360
   9        3PZ        -0.00005  -0.24683  -0.00001   0.00039  -0.00286
  10        4XX         0.00376   0.00000   0.00002   0.00622   0.01198
  11        4YY        -0.00422  -0.00001  -0.01076   0.00744   0.00156
  12        4ZZ        -0.00035   0.00001  -0.00373  -0.02217  -0.00321
  13        4XY        -0.00964   0.00000   0.01183  -0.01607  -0.00398
  14        4XZ         0.00000  -0.02994   0.00001   0.00000   0.00003
  15        4YZ         0.00000  -0.01413   0.00001  -0.00002  -0.00004
  16 2   C  1S         -0.01037   0.00001   0.01346  -0.00085  -0.02575
  17        2S          0.02115  -0.00002   0.01201   0.05356   0.03304
  18        2PX         0.02317  -0.00001  -0.06701   0.07643  -0.08522
  19        2PY        -0.06776   0.00002   0.05489  -0.06607  -0.05851
  20        2PZ         0.00001  -0.46998   0.00011  -0.00008   0.00042
  21        3S          0.06498  -0.00008  -0.22987  -0.22929   0.33772
  22        3PX         0.14706  -0.00002  -0.20311   0.13894  -0.26795
  23        3PY        -0.10465  -0.00003  -0.10113   0.11177  -0.16515
  24        3PZ         0.00002  -0.49458   0.00013  -0.00016   0.00097
  25        4XX         0.02354   0.00000   0.00559  -0.00045  -0.01437
  26        4YY        -0.02176   0.00000   0.00636   0.01008   0.01100
  27        4ZZ         0.00139   0.00000  -0.00548  -0.00222  -0.00071
  28        4XY         0.03575   0.00000  -0.00279   0.01825   0.02256
  29        4XZ         0.00000   0.01912   0.00000   0.00000   0.00003
  30        4YZ         0.00000   0.02250   0.00000   0.00000  -0.00002
  31 3   O  1S          0.03036  -0.00001  -0.06226   0.03729  -0.03677
  32        2S         -0.06623   0.00003   0.12195  -0.09681   0.04671
  33        2PX         0.08078  -0.00004  -0.15160   0.11910  -0.00023
  34        2PY        -0.11061  -0.00002  -0.14763   0.08091  -0.22188
  35        2PZ        -0.00001   0.17830  -0.00003  -0.00001  -0.00027
  36        3S         -0.25403   0.00011   0.68716  -0.31975   0.50877
  37        3PX         0.11197  -0.00005  -0.22823   0.13820  -0.05564
  38        3PY        -0.10803  -0.00004  -0.20536   0.15185  -0.32005
  39        3PZ        -0.00002   0.20668  -0.00004   0.00002  -0.00026
  40        4XX         0.00054   0.00000  -0.00861   0.00383  -0.00648
  41        4YY         0.00970   0.00000  -0.01897   0.01029  -0.02881
  42        4ZZ         0.00163   0.00000  -0.01755  -0.00418  -0.01635
  43        4XY         0.00471   0.00000  -0.00170  -0.00189  -0.00772
  44        4XZ         0.00000   0.00880   0.00000   0.00000  -0.00002
  45        4YZ         0.00000  -0.01655   0.00000   0.00000   0.00002
  46 4   N  1S          0.00146   0.00000  -0.01725  -0.00686  -0.00763
  47        2S         -0.00938   0.00001   0.03868   0.02038   0.01021
  48        2PX         0.52494   0.00000   0.02041  -0.10316   0.05588
  49        2PY        -0.12219   0.00000  -0.05251  -0.00991  -0.07520
  50        2PZ         0.00001   0.41083  -0.00009   0.00008  -0.00015
  51        3S          0.01844   0.00004   0.22516   0.00205   0.12358
  52        3PX         0.47788   0.00000   0.02781  -0.14447   0.05187
  53        3PY        -0.11774  -0.00002  -0.16347  -0.00668  -0.11111
  54        3PZ         0.00001   0.53045  -0.00012   0.00010  -0.00041
  55        4XX        -0.01130   0.00000  -0.00166  -0.00045  -0.00307
  56        4YY         0.00668   0.00000   0.00756   0.00194  -0.00296
  57        4ZZ        -0.00122   0.00000  -0.00125  -0.00066  -0.00125
  58        4XY        -0.01954   0.00000   0.00609  -0.00347  -0.00147
  59        4XZ         0.00000   0.00374   0.00000   0.00000   0.00001
  60        4YZ         0.00000   0.00459   0.00000   0.00000  -0.00001
  61 5   H  1S          0.03640  -0.00008  -0.08701   0.11085   0.10102
  62        2S         -0.03577  -0.00043  -0.84978   0.70765   1.60406
  63        3PX        -0.00041   0.00000   0.00105  -0.00689  -0.01132
  64        3PY        -0.00063   0.00000  -0.00825  -0.00184   0.00800
  65        3PZ         0.00000  -0.00063   0.00000   0.00000  -0.00005
  66 6   H  1S         -0.03728  -0.10107  -0.01235  -0.09456  -0.00173
  67        2S         -0.09853  -0.41463  -0.69919  -1.21184   0.08528
  68        3PX         0.00461   0.00612  -0.00710   0.00392   0.00049
  69        3PY         0.00170   0.00262   0.00657  -0.00633  -0.00534
  70        3PZ        -0.00205  -0.00031   0.00485   0.01276   0.00011
  71 7   H  1S         -0.03724   0.10113  -0.01240  -0.09451  -0.00129
  72        2S         -0.09842   0.41473  -0.69933  -1.21156   0.09204
  73        3PX         0.00461  -0.00612  -0.00709   0.00392   0.00050
  74        3PY         0.00170  -0.00261   0.00656  -0.00634  -0.00540
  75        3PZ         0.00205  -0.00031  -0.00486  -0.01275  -0.00010
  76 8   H  1S          0.04420  -0.00002  -0.10173   0.07385  -0.13272
  77        2S          0.09384  -0.00016  -0.92834   0.57613  -0.96985
  78        3PX         0.00235   0.00000   0.01101  -0.00705   0.00539
  79        3PY        -0.00301   0.00000   0.01269  -0.01044   0.01360
  80        3PZ         0.00000   0.00736   0.00000   0.00000   0.00000
                          21        22        23        24        25
                           V         V         V         V         V
     Eigenvalues --     0.19136   0.23372   0.34369   0.41487   0.58129
   1 1   C  1S          0.00019   0.06372  -0.04653  -0.00282   0.00000
   2        2S         -0.00028  -0.04913  -0.00940  -0.02854   0.00004
   3        2PX         0.00046  -0.27837  -0.05472   0.00729   0.00016
   4        2PY        -0.00049  -0.01681  -0.05317  -0.12798  -0.00002
   5        2PZ         0.43910   0.00015   0.00011   0.00004  -0.55580
   6        3S         -0.00321  -0.99838   1.28200   0.37791   0.00001
   7        3PX         0.00076  -1.49790   1.17940   0.41930  -0.00013
   8        3PY        -0.00126  -0.00501   0.67403  -0.98276   0.00000
   9        3PZ         1.32032   0.00033   0.00016   0.00003   1.12478
  10        4XX         0.00002   0.04743  -0.03776  -0.01837   0.00001
  11        4YY         0.00002  -0.02478  -0.00921   0.00746   0.00009
  12        4ZZ        -0.00002  -0.01040   0.02200   0.00349  -0.00007
  13        4XY        -0.00001   0.00560  -0.02554   0.05842  -0.00002
  14        4XZ        -0.01279   0.00000   0.00000   0.00000  -0.00103
  15        4YZ         0.01558   0.00001   0.00001   0.00001   0.07951
  16 2   C  1S         -0.00001  -0.15796  -0.03301  -0.04692  -0.00001
  17        2S          0.00004   0.20821  -0.01268  -0.01137   0.00028
  18        2PX        -0.00025  -0.11451   0.53924  -0.03935   0.00020
  19        2PY        -0.00004  -0.23285  -0.16242   0.32366  -0.00018
  20        2PZ        -0.19770  -0.00008  -0.00002  -0.00001  -0.61046
  21        3S         -0.00011   2.64619   0.27073   1.87648  -0.00050
  22        3PX        -0.00065  -0.53675   1.95425   0.52953  -0.00026
  23        3PY        -0.00033  -0.49396  -0.25668   3.09645   0.00043
  24        3PZ        -0.45488  -0.00020  -0.00005  -0.00004   0.37711
  25        4XX        -0.00001  -0.01903  -0.02825   0.00909   0.00004
  26        4YY         0.00003  -0.00393  -0.01707  -0.01505  -0.00001
  27        4ZZ        -0.00001   0.01939   0.02248   0.00663   0.00001
  28        4XY         0.00005   0.00642   0.00717  -0.01418   0.00003
  29        4XZ        -0.01243  -0.00001   0.00000   0.00000  -0.02685
  30        4YZ         0.00670   0.00000   0.00000   0.00000  -0.00105
  31 3   O  1S         -0.00012   0.05844   0.05738  -0.02652   0.00000
  32        2S          0.00017  -0.11827  -0.10880   0.00606  -0.00001
  33        2PX        -0.00006   0.15134   0.03275  -0.10835   0.00007
  34        2PY        -0.00044  -0.17376  -0.31171   0.04121  -0.00011
  35        2PZ         0.11876   0.00004   0.00002  -0.00001  -0.06002
  36        3S          0.00156  -0.72600  -0.77886   0.77595   0.00032
  37        3PX        -0.00028   0.39965   0.13962  -0.48266  -0.00013
  38        3PY        -0.00060  -0.34783  -0.83254   0.10750   0.00012
  39        3PZ         0.12575   0.00003  -0.00001   0.00003  -0.01584
  40        4XX        -0.00001  -0.00279  -0.00111  -0.02305   0.00000
  41        4YY        -0.00007   0.00769   0.02735   0.00924   0.00004
  42        4ZZ        -0.00005   0.01622   0.01365  -0.02096  -0.00003
  43        4XY        -0.00001  -0.01562   0.00248   0.02000  -0.00005
  44        4XZ         0.00645   0.00000   0.00000   0.00000   0.00682
  45        4YZ        -0.00900   0.00000   0.00000   0.00000  -0.03148
  46 4   N  1S         -0.00003   0.02961   0.03683   0.12201   0.00000
  47        2S          0.00003  -0.05824  -0.10133  -0.24087  -0.00004
  48        2PX         0.00020  -0.00626  -0.10901   0.10774   0.00007
  49        2PY        -0.00025   0.16578   0.10344   0.10539   0.00001
  50        2PZ         0.08195   0.00002   0.00000   0.00002  -0.15996
  51        3S          0.00051  -0.32666  -0.47661  -2.88132   0.00000
  52        3PX         0.00017   0.12716  -0.45157   0.66587  -0.00001
  53        3PY        -0.00045   0.34797   0.51679   1.59958  -0.00002
  54        3PZ         0.19997   0.00007   0.00001  -0.00006   0.07098
  55        4XX         0.00000  -0.00744  -0.01251   0.00494  -0.00002
  56        4YY        -0.00001  -0.00640  -0.00913  -0.04519   0.00001
  57        4ZZ        -0.00001   0.01200   0.00233   0.00238  -0.00002
  58        4XY         0.00000  -0.00163  -0.01693  -0.01114  -0.00002
  59        4XZ        -0.00404   0.00000   0.00000   0.00000  -0.00433
  60        4YZ         0.00562   0.00000   0.00000   0.00000   0.03684
  61 5   H  1S          0.00023  -0.03684   0.02514  -0.13813   0.00012
  62        2S          0.00408  -0.51590  -0.16178   0.80265   0.00009
  63        3PX        -0.00003  -0.02008   0.00673   0.01931   0.00000
  64        3PY         0.00003  -0.01308   0.00371   0.00555   0.00001
  65        3PZ         0.02022   0.00001   0.00001  -0.00001   0.03354
  66 6   H  1S          0.08735  -0.05392   0.07822   0.03266   0.37127
  67        2S          1.40865  -0.04202   0.14935  -0.37519   0.16545
  68        3PX         0.00116  -0.01151   0.01190  -0.01694  -0.00278
  69        3PY        -0.01144   0.00204   0.00975  -0.00405  -0.00181
  70        3PZ        -0.00143   0.00200  -0.00239   0.00702   0.02899
  71 7   H  1S         -0.08733  -0.05396   0.07821   0.03261  -0.37137
  72        2S         -1.40834  -0.04306   0.14871  -0.37473  -0.16559
  73        3PX        -0.00116  -0.01150   0.01190  -0.01692   0.00277
  74        3PY         0.01141   0.00204   0.00975  -0.00404   0.00180
  75        3PZ        -0.00144  -0.00201   0.00238  -0.00702   0.02900
  76 8   H  1S         -0.00031  -0.02098  -0.03411   0.08937  -0.00003
  77        2S         -0.00243   0.10563  -0.63757   0.10730   0.00008
  78        3PX         0.00000   0.01216   0.00582   0.00323   0.00002
  79        3PY         0.00003  -0.00442  -0.00464  -0.01554  -0.00001
  80        3PZ         0.00028   0.00000   0.00000   0.00000   0.01161
                          26        27        28        29        30
                           V         V         V         V         V
     Eigenvalues --     0.58931   0.63377   0.65037   0.67183   0.69827
   1 1   C  1S          0.02080   0.01835  -0.00936   0.00000  -0.01009
   2        2S         -0.24977  -0.14173   0.08246  -0.00002  -0.07963
   3        2PX        -0.71506  -0.59413   0.21378   0.00009   0.01827
   4        2PY        -0.31528   0.38269   0.46474   0.00032   0.39585
   5        2PZ        -0.00008   0.00007   0.00030  -0.54289   0.00002
   6        3S          0.47036  -0.04885   0.17760   0.00048   1.03350
   7        3PX         1.02108   1.25632  -0.07013   0.00026   0.61263
   8        3PY         0.74040  -1.38388  -0.90964  -0.00061  -1.19946
   9        3PZ         0.00021  -0.00014  -0.00075   1.51012  -0.00005
  10        4XX         0.00685  -0.01700   0.02017   0.00003   0.04329
  11        4YY        -0.03123   0.05593   0.04261   0.00009   0.01724
  12        4ZZ        -0.02332  -0.05092  -0.04462  -0.00011  -0.05287
  13        4XY         0.00472  -0.01898  -0.03995  -0.00005   0.02974
  14        4XZ         0.00000   0.00002   0.00005  -0.02992   0.00001
  15        4YZ         0.00003  -0.00008  -0.00009   0.04933  -0.00004
  16 2   C  1S         -0.00615  -0.03806   0.00503   0.00000   0.03595
  17        2S         -0.48380   0.53647  -0.28876  -0.00010  -0.33015
  18        2PX        -0.58194   0.20183  -0.17213  -0.00022  -0.35899
  19        2PY         0.15439  -0.04904   0.57651   0.00041  -0.79818
  20        2PZ        -0.00026  -0.00004  -0.00071   0.77193  -0.00003
  21        3S          0.01912  -1.02284   1.28438   0.00054  -0.17950
  22        3PX         0.99562  -0.70250   0.82744   0.00100   0.96561
  23        3PY        -0.76086   1.65869  -0.32292  -0.00010   2.17494
  24        3PZ         0.00023   0.00011   0.00109  -1.43208   0.00008
  25        4XX        -0.15371  -0.06127   0.01975   0.00000  -0.03070
  26        4YY         0.02780  -0.00316   0.01266   0.00003   0.04827
  27        4ZZ         0.01154   0.06013  -0.02844  -0.00002  -0.04427
  28        4XY        -0.06390   0.03562  -0.00734   0.00001   0.05485
  29        4XZ        -0.00002   0.00000  -0.00001   0.00195   0.00001
  30        4YZ         0.00000  -0.00001  -0.00002   0.01398  -0.00001
  31 3   O  1S         -0.00162  -0.02740  -0.00455  -0.00001  -0.00876
  32        2S         -0.01625   0.06815   0.00186  -0.00003  -0.14167
  33        2PX        -0.11212   0.30640  -0.10579  -0.00006  -0.02835
  34        2PY         0.09680  -0.12569  -0.04995  -0.00012  -0.13113
  35        2PZ         0.00000  -0.00004  -0.00018   0.22560  -0.00006
  36        3S         -0.46687   1.00088  -0.36461  -0.00018   0.75252
  37        3PX         0.14153  -0.47265   0.06730  -0.00003  -0.29586
  38        3PY        -0.21422   0.37844  -0.17912  -0.00012   0.06985
  39        3PZ        -0.00004   0.00004  -0.00004   0.05589   0.00005
  40        4XX         0.01209   0.06603  -0.02257  -0.00002   0.00555
  41        4YY        -0.12789   0.03933  -0.07767  -0.00009  -0.05497
  42        4ZZ         0.04295  -0.02486   0.03388   0.00002  -0.07850
  43        4XY         0.04724  -0.08114   0.07726   0.00005  -0.02100
  44        4XZ         0.00001   0.00000   0.00002  -0.02922  -0.00001
  45        4YZ        -0.00002   0.00000  -0.00002   0.01141   0.00000
  46 4   N  1S         -0.00348   0.02314   0.02872   0.00003  -0.02428
  47        2S         -0.10952  -0.00180  -0.04535  -0.00015  -0.10941
  48        2PX         0.04582   0.11079  -0.29047  -0.00019  -0.18693
  49        2PY        -0.06892  -0.04382   0.01997  -0.00004  -0.17959
  50        2PZ        -0.00005   0.00008  -0.00011   0.15656   0.00005
  51        3S          0.38659  -0.74320  -0.47805  -0.00029  -0.86729
  52        3PX        -0.15351   0.35038   0.08053   0.00000   0.00192
  53        3PY        -0.12084   0.34166   0.60841   0.00055   0.07870
  54        3PZ         0.00002  -0.00010  -0.00016   0.17839  -0.00008
  55        4XX         0.01267  -0.00789  -0.02425  -0.00004  -0.02071
  56        4YY        -0.07594   0.02969   0.01619  -0.00003  -0.17252
  57        4ZZ        -0.01127   0.00170  -0.00656  -0.00003   0.00359
  58        4XY         0.03844   0.01229   0.01131   0.00000  -0.07857
  59        4XZ         0.00000   0.00001   0.00002  -0.03140   0.00001
  60        4YZ         0.00002   0.00000   0.00003  -0.03036   0.00001
  61 5   H  1S          0.06255   0.37463   0.36156   0.00041  -0.01045
  62        2S         -0.07799   0.66313   0.10034   0.00028   0.52136
  63        3PX        -0.01559   0.04296  -0.01290   0.00000   0.03899
  64        3PY        -0.01434  -0.01326  -0.02018   0.00000  -0.00938
  65        3PZ         0.00002  -0.00001  -0.00002   0.03640  -0.00001
  66 6   H  1S          0.06006  -0.02208  -0.18341   0.16812  -0.08423
  67        2S          0.19109  -0.16011  -0.12102   0.39555  -0.26290
  68        3PX         0.00533  -0.00592   0.01544   0.04159  -0.03595
  69        3PY         0.01245  -0.03527  -0.02826   0.00916  -0.02897
  70        3PZ         0.01344   0.00500  -0.00302   0.02840   0.00462
  71 7   H  1S          0.05981  -0.02188  -0.18311  -0.16844  -0.08413
  72        2S          0.19092  -0.15960  -0.12055  -0.39589  -0.26249
  73        3PX         0.00533  -0.00589   0.01551  -0.04160  -0.03591
  74        3PY         0.01244  -0.03526  -0.02825  -0.00922  -0.02897
  75        3PZ        -0.01343  -0.00500   0.00300   0.02840  -0.00462
  76 8   H  1S         -0.09084  -0.12595   0.01324  -0.00005   0.01845
  77        2S         -0.13958   0.03985  -0.41475  -0.00035  -0.00847
  78        3PX        -0.02377  -0.00552  -0.02905  -0.00002   0.01290
  79        3PY         0.03719   0.00176   0.04293   0.00005   0.00960
  80        3PZ         0.00000   0.00000   0.00000   0.00594   0.00000
                          31        32        33        34        35
                           V         V         V         V         V
     Eigenvalues --     0.76366   0.81571   0.83092   0.83319   0.86363
   1 1   C  1S         -0.01715  -0.05387   0.00258   0.00005   0.00844
   2        2S          0.22422   0.16933  -0.09542  -0.00094  -0.05957
   3        2PX         0.07892  -0.07746   0.00889   0.00012  -0.14216
   4        2PY        -0.10339   0.12182  -0.23665  -0.00224   0.60899
   5        2PZ         0.00003   0.00018  -0.00468   0.47698  -0.00044
   6        3S         -0.72479  -0.70037   0.30379   0.00281   0.55625
   7        3PX        -0.54249  -0.59508   0.01983   0.00014   0.50906
   8        3PY         0.20879  -0.49788   0.81670   0.00809  -0.72943
   9        3PZ        -0.00012  -0.00020   0.00832  -0.85265   0.00082
  10        4XX        -0.01386  -0.04617   0.05431   0.00052  -0.00923
  11        4YY        -0.00214  -0.01788  -0.07862  -0.00067  -0.08980
  12        4ZZ         0.00584  -0.03393   0.00835   0.00003   0.11710
  13        4XY        -0.05784   0.00749  -0.06914  -0.00069   0.11590
  14        4XZ         0.00000   0.00003  -0.00074   0.07616  -0.00010
  15        4YZ        -0.00002   0.00006  -0.00131   0.13677   0.00007
  16 2   C  1S          0.04447  -0.02184   0.01316   0.00014   0.01471
  17        2S         -0.26150  -0.94762   0.09984   0.00120   0.26820
  18        2PX         0.23582   0.28668  -0.12478  -0.00122  -0.17376
  19        2PY        -0.06282   0.11249  -0.07336  -0.00077   0.09297
  20        2PZ        -0.00001   0.00003   0.00049  -0.05410  -0.00011
  21        3S          1.55933   1.74519  -0.38725  -0.00392  -0.42877
  22        3PX        -0.47027  -0.72629   0.33229   0.00309   0.97145
  23        3PY         0.24881  -0.30921  -0.41297  -0.00416  -0.74776
  24        3PZ         0.00001  -0.00004  -0.00291   0.31012   0.00013
  25        4XX        -0.02915  -0.04787  -0.00130   0.00000   0.06250
  26        4YY         0.18285  -0.17176   0.03882   0.00046   0.05601
  27        4ZZ        -0.06446  -0.00650  -0.01497  -0.00016  -0.01540
  28        4XY         0.06269   0.04397   0.09524   0.00089  -0.00181
  29        4XZ         0.00000  -0.00003   0.00046  -0.04772   0.00004
  30        4YZ        -0.00001   0.00000  -0.00023   0.02399   0.00002
  31 3   O  1S         -0.01136  -0.00110   0.02226   0.00022   0.01382
  32        2S          0.09927   0.09292   0.07719   0.00069  -0.23587
  33        2PX        -0.17526   0.30141   0.53777   0.00510  -0.02036
  34        2PY         0.04878  -0.02527   0.13668   0.00143   0.14034
  35        2PZ         0.00002  -0.00004   0.00129  -0.13047  -0.00022
  36        3S         -0.25489  -0.23618  -0.22706  -0.00218  -0.01837
  37        3PX         0.22402  -0.23551  -0.48095  -0.00449   0.18590
  38        3PY        -0.19850   0.05258  -0.04855  -0.00060  -0.39994
  39        3PZ        -0.00002   0.00006  -0.00090   0.08895   0.00018
  40        4XX         0.01683   0.03272   0.08906   0.00084  -0.02297
  41        4YY        -0.09947   0.04057   0.19509   0.00189  -0.08775
  42        4ZZ         0.06675   0.06356  -0.02839  -0.00030  -0.06466
  43        4XY        -0.09742   0.04822   0.14592   0.00141   0.06255
  44        4XZ         0.00001  -0.00001   0.00011  -0.01179  -0.00001
  45        4YZ         0.00001  -0.00002   0.00027  -0.02873  -0.00001
  46 4   N  1S          0.01380  -0.00702  -0.00705  -0.00007  -0.00397
  47        2S         -0.14604  -0.05111  -0.19248  -0.00180   0.05366
  48        2PX        -0.06514   0.41182  -0.29964  -0.00321   0.31580
  49        2PY        -0.73693   0.02660  -0.39065  -0.00386  -0.31869
  50        2PZ        -0.00005   0.00026  -0.00706   0.72848   0.00027
  51        3S         -0.32837   0.05436   0.60101   0.00591   0.27926
  52        3PX         0.31203  -0.40629   0.18896   0.00219  -0.66219
  53        3PY         1.07981  -0.13722   0.30550   0.00301   0.37487
  54        3PZ         0.00003  -0.00023   0.00794  -0.82355  -0.00034
  55        4XX        -0.06004  -0.02964  -0.05384  -0.00051  -0.01461
  56        4YY        -0.12784   0.00579  -0.09380  -0.00092   0.03112
  57        4ZZ        -0.03410   0.02236  -0.05989  -0.00058  -0.02207
  58        4XY        -0.03393  -0.02863  -0.00692  -0.00005  -0.01986
  59        4XZ         0.00000   0.00000  -0.00004   0.00374   0.00000
  60        4YZ         0.00000   0.00000   0.00012  -0.01233  -0.00001
  61 5   H  1S         -0.05299  -0.39529   0.07435   0.00089  -0.56872
  62        2S         -0.26880   0.29583  -0.55838  -0.00583   1.20850
  63        3PX         0.00158   0.03593  -0.03969  -0.00041   0.03598
  64        3PY        -0.00098  -0.04283   0.00282   0.00006  -0.05575
  65        3PZ         0.00000   0.00005  -0.00031   0.03212   0.00003
  66 6   H  1S         -0.13162  -0.40858  -0.01859   0.49841   0.36813
  67        2S          0.16157   0.00179   0.33100  -0.98071  -0.61611
  68        3PX         0.01699   0.00942  -0.00281  -0.03119  -0.03055
  69        3PY         0.01499   0.01367   0.03416  -0.04653   0.01264
  70        3PZ         0.01327   0.03490  -0.01234  -0.02730  -0.06125
  71 7   H  1S         -0.13152  -0.40908  -0.00876  -0.49834   0.36842
  72        2S          0.16144   0.00267   0.31127   0.98715  -0.61700
  73        3PX         0.01699   0.00945  -0.00343   0.03115  -0.03057
  74        3PY         0.01497   0.01369   0.03324   0.04718   0.01266
  75        3PZ        -0.01328  -0.03493   0.01286  -0.02705   0.06125
  76 8   H  1S         -0.48888   0.07709   0.57938   0.00562   0.16113
  77        2S          0.54624  -0.28444  -0.67607  -0.00645  -0.51904
  78        3PX         0.04138  -0.05191  -0.08186  -0.00077  -0.05424
  79        3PY         0.06443  -0.00639  -0.14060  -0.00138  -0.02379
  80        3PZ         0.00000   0.00001  -0.00014   0.01453   0.00001
                          36        37        38        39        40
                           V         V         V         V         V
     Eigenvalues --     0.89507   0.90982   0.93637   0.98905   1.03645
   1 1   C  1S         -0.00001   0.02157   0.01995  -0.00001  -0.00845
   2        2S          0.00020  -0.20335  -1.07121  -0.00025   0.25058
   3        2PX         0.00007   0.24556   0.34435   0.00008  -0.17776
   4        2PY        -0.00051  -0.25330   0.17241  -0.00016   0.00468
   5        2PZ        -0.56568   0.00030  -0.00020  -0.06276  -0.00018
   6        3S         -0.00046   1.41706   1.63801   0.00093  -1.32902
   7        3PX        -0.00019   0.12900  -1.36002  -0.00007   0.17831
   8        3PY         0.00093   0.61256  -0.62941   0.00073  -0.55145
   9        3PZ         0.96272  -0.00066   0.00046   0.49785   0.00080
  10        4XX         0.00004   0.07676  -0.18645   0.00002  -0.03820
  11        4YY        -0.00008   0.09537   0.01747   0.00001   0.08944
  12        4ZZ         0.00005  -0.12126   0.05477  -0.00005  -0.07977
  13        4XY        -0.00003  -0.04041  -0.04638  -0.00003  -0.00609
  14        4XZ        -0.04388   0.00006  -0.00002  -0.07377   0.00004
  15        4YZ        -0.16146  -0.00010  -0.00003   0.01897  -0.00014
  16 2   C  1S         -0.00001   0.01269  -0.02989   0.00000   0.00349
  17        2S         -0.00003   0.25467  -0.80139   0.00015  -0.12628
  18        2PX         0.00002  -0.30974   0.28914  -0.00012   0.29296
  19        2PY         0.00001  -0.03022  -0.02581   0.00011  -0.11841
  20        2PZ        -0.23859   0.00001  -0.00002   0.24849   0.00015
  21        3S         -0.00013  -0.59415   2.16236  -0.00111   0.98157
  22        3PX        -0.00019   1.61613  -1.11997   0.00032  -0.87932
  23        3PY         0.00010   0.13094   0.04336  -0.00040   0.31107
  24        3PZ         0.50495   0.00010  -0.00006  -0.92870  -0.00069
  25        4XX        -0.00001   0.07747  -0.11639  -0.00002   0.01028
  26        4YY        -0.00004  -0.00285  -0.03833  -0.00004   0.08084
  27        4ZZ         0.00001   0.00057   0.01492   0.00002  -0.03321
  28        4XY         0.00002   0.05530  -0.04215   0.00005  -0.09658
  29        4XZ         0.05067  -0.00001   0.00000   0.01604  -0.00004
  30        4YZ         0.05534   0.00000   0.00001   0.00210  -0.00001
  31 3   O  1S         -0.00001   0.00291   0.00042   0.00000  -0.00869
  32        2S          0.00016   0.03026  -0.05886   0.00030  -0.69317
  33        2PX        -0.00004  -0.04637   0.08916   0.00014  -0.30963
  34        2PY        -0.00016   0.06345   0.16905  -0.00032   0.50820
  35        2PZ        -0.14121  -0.00003  -0.00006  -0.91053  -0.00044
  36        3S         -0.00017  -0.31031   0.10740  -0.00072   1.78044
  37        3PX        -0.00004  -0.11741   0.01726  -0.00023   0.49759
  38        3PY         0.00028  -0.23951  -0.26364   0.00056  -0.84604
  39        3PZ         0.06428   0.00001   0.00007   1.23170   0.00068
  40        4XX         0.00002  -0.00064  -0.00622   0.00008  -0.15654
  41        4YY         0.00003   0.01305  -0.02326   0.00003  -0.10328
  42        4ZZ         0.00005   0.01269   0.01216   0.00013  -0.31117
  43        4XY        -0.00004   0.02357   0.00687  -0.00005   0.08697
  44        4XZ         0.00177   0.00001  -0.00001   0.02457   0.00001
  45        4YZ        -0.01162   0.00000  -0.00002  -0.04730  -0.00006
  46 4   N  1S          0.00000   0.00501  -0.00154   0.00000   0.00113
  47        2S         -0.00006   0.00690  -0.04455  -0.00016   0.09779
  48        2PX         0.00000   0.70808  -0.00316  -0.00007  -0.00728
  49        2PY         0.00019  -0.18785  -0.00918   0.00005  -0.01096
  50        2PZ         0.65105   0.00004   0.00006  -0.14439  -0.00008
  51        3S          0.00005  -0.29379  -0.20721   0.00067  -0.39120
  52        3PX         0.00007  -1.14353   0.26839  -0.00008   0.31988
  53        3PY        -0.00024   0.44096   0.00034  -0.00022   0.06859
  54        3PZ        -0.90307  -0.00008  -0.00007   0.41780   0.00028
  55        4XX         0.00001  -0.02178  -0.01025  -0.00002   0.02044
  56        4YY         0.00000   0.01823  -0.04963  -0.00001  -0.01501
  57        4ZZ         0.00000   0.00632   0.04051  -0.00006   0.03034
  58        4XY         0.00000  -0.04543   0.02218   0.00000   0.03169
  59        4XZ        -0.02010   0.00000  -0.00001   0.02191   0.00000
  60        4YZ        -0.03344   0.00000   0.00000   0.01367   0.00002
  61 5   H  1S          0.00012   0.62896   0.34865  -0.00004   0.15797
  62        2S         -0.00041  -1.19580  -0.88473  -0.00046   0.35474
  63        3PX         0.00000  -0.03212  -0.00050  -0.00001   0.03050
  64        3PY        -0.00001   0.05554   0.05968   0.00003   0.00061
  65        3PZ        -0.04293  -0.00003  -0.00004   0.04161  -0.00001
  66 6   H  1S         -0.48386  -0.04401   0.41573   0.01932  -0.24875
  67        2S          1.15751   0.23850  -1.21663   0.21030   0.35411
  68        3PX        -0.00187  -0.01073   0.02092   0.03526   0.00669
  69        3PY         0.04581  -0.04259  -0.02947  -0.00665  -0.02722
  70        3PZ         0.03706   0.02058  -0.05980   0.00007   0.04133
  71 7   H  1S          0.48342  -0.04407   0.41596  -0.01933  -0.24858
  72        2S         -1.15663   0.23905  -1.21733  -0.21028   0.35314
  73        3PX         0.00188  -0.01072   0.02092  -0.03529   0.00675
  74        3PY        -0.04578  -0.04261  -0.02944   0.00665  -0.02730
  75        3PZ         0.03703  -0.02057   0.05985   0.00005  -0.04129
  76 8   H  1S         -0.00012   0.04745  -0.04954  -0.00022   0.43744
  77        2S          0.00028  -0.09618  -0.10608   0.00064  -1.35202
  78        3PX         0.00003   0.01407  -0.03373   0.00004  -0.08565
  79        3PY         0.00004  -0.02501  -0.02252   0.00006  -0.09847
  80        3PZ        -0.00471  -0.00001   0.00002   0.01437   0.00001
                          41        42        43        44        45
                           V         V         V         V         V
     Eigenvalues --     1.13402   1.31807   1.34285   1.39924   1.43823
   1 1   C  1S          0.06525   0.00008   0.04178   0.05249  -0.00012
   2        2S          1.12599   0.00082   0.44777   0.65382  -0.00164
   3        2PX        -0.00021  -0.00020  -0.08903  -0.03999  -0.00011
   4        2PY         0.09863  -0.00004  -0.02137   0.10632   0.00006
   5        2PZ        -0.00014  -0.09279   0.00011   0.00005   0.04242
   6        3S         -2.74047  -0.00433  -2.29444  -2.78222   0.00608
   7        3PX         0.19143  -0.00108  -0.55882  -0.75472   0.00164
   8        3PY        -0.32769  -0.00111  -0.62398  -0.21219  -0.00033
   9        3PZ         0.00051   0.25994  -0.00021  -0.00024  -0.22318
  10        4XX         0.04802  -0.00016  -0.07861   0.11956  -0.00001
  11        4YY         0.05208  -0.00041  -0.01355  -0.27194  -0.00011
  12        4ZZ         0.10823   0.00063   0.12381   0.22696  -0.00008
  13        4XY         0.00147   0.00004  -0.01346  -0.19593  -0.00003
  14        4XZ        -0.00003   0.53387  -0.00111  -0.00019  -0.03039
  15        4YZ         0.00001  -0.17844   0.00038   0.00033   0.06814
  16 2   C  1S         -0.01049  -0.00006  -0.03283  -0.02238   0.00005
  17        2S         -0.46157  -0.00123  -0.65635  -0.13436   0.00033
  18        2PX        -0.17219   0.00013   0.08399   0.16145  -0.00022
  19        2PY        -0.09314  -0.00043  -0.21722   0.01683  -0.00004
  20        2PZ         0.00006   0.12215  -0.00020  -0.00001  -0.00322
  21        3S          3.27167   0.00819   4.33231   0.07880  -0.00040
  22        3PX         1.15601  -0.00165  -0.90894  -1.70840   0.00347
  23        3PY         0.76411   0.00269   1.61760  -2.03712   0.00203
  24        3PZ        -0.00035  -0.39140   0.00052   0.00011   0.12405
  25        4XX         0.02200  -0.00024  -0.14525   0.02686   0.00000
  26        4YY        -0.01386   0.00003   0.04434  -0.08493   0.00013
  27        4ZZ         0.03763   0.00013   0.06288   0.06573  -0.00008
  28        4XY        -0.06334   0.00020   0.09340  -0.01529   0.00003
  29        4XZ         0.00001  -0.42936   0.00088   0.00002  -0.16143
  30        4YZ         0.00001  -0.12333   0.00027   0.00029   0.57808
  31 3   O  1S          0.02665   0.00010   0.03905   0.03993   0.00001
  32        2S          0.50121   0.00118   0.43191   0.64000   0.00032
  33        2PX         0.19982  -0.00050  -0.21923  -0.29949   0.00000
  34        2PY         0.46173  -0.00067  -0.31609   0.01741   0.00025
  35        2PZ        -0.00012  -0.06012   0.00008   0.00001   0.04815
  36        3S         -1.44003  -0.00341  -1.25651  -1.72940  -0.00069
  37        3PX        -0.37964   0.00158   0.69587   1.01665  -0.00042
  38        3PY        -1.47556   0.00193   0.93758   0.28033  -0.00110
  39        3PZ         0.00022   0.17305  -0.00027  -0.00001   0.02140
  40        4XX        -0.00192   0.00048   0.21066   0.27091   0.00001
  41        4YY         0.23713   0.00032   0.09834   0.26197   0.00021
  42        4ZZ         0.27506   0.00024   0.07178  -0.00497   0.00003
  43        4XY        -0.02029   0.00012   0.07450   0.01831  -0.00009
  44        4XZ         0.00002  -0.01694   0.00004   0.00010   0.27842
  45        4YZ        -0.00002  -0.21768   0.00041  -0.00012  -0.37085
  46 4   N  1S          0.02651   0.00009   0.05095  -0.04282   0.00005
  47        2S          0.45376   0.00210   1.14370  -0.92053   0.00087
  48        2PX        -0.03371   0.00002  -0.01166   0.15271  -0.00009
  49        2PY         0.02637  -0.00057  -0.29092   0.14690  -0.00006
  50        2PZ        -0.00003  -0.00831  -0.00001  -0.00006  -0.12662
  51        3S         -2.31044  -0.00704  -3.88486   3.22140  -0.00350
  52        3PX         0.07936   0.00108   0.65738  -0.36978  -0.00001
  53        3PY         0.78637   0.00291   1.57809  -1.25248   0.00140
  54        3PZ         0.00009   0.21889  -0.00038  -0.00002  -0.06477
  55        4XX         0.03650   0.00022   0.11998  -0.18026   0.00012
  56        4YY         0.03270   0.00040   0.20283  -0.22138   0.00023
  57        4ZZ         0.19975   0.00045   0.23811  -0.02514   0.00006
  58        4XY         0.00824   0.00000   0.03172  -0.01850  -0.00005
  59        4XZ         0.00001  -0.03692   0.00007  -0.00006  -0.19286
  60        4YZ         0.00001   0.17096  -0.00035  -0.00015  -0.30813
  61 5   H  1S          0.17039   0.00036   0.19990   0.20775  -0.00035
  62        2S          0.85736   0.00077   0.38516   0.25170  -0.00020
  63        3PX        -0.00382  -0.00003   0.01807  -0.15911   0.00000
  64        3PY        -0.00898  -0.00012   0.01869  -0.13287  -0.00001
  65        3PZ         0.00002  -0.18977   0.00038   0.00013  -0.00568
  66 6   H  1S          0.21677  -0.03631   0.13568   0.16788  -0.03494
  67        2S          0.41320   0.13475  -0.01566   0.12370  -0.11535
  68        3PX         0.01381  -0.15927   0.02154   0.09095   0.02126
  69        3PY         0.00111   0.07105   0.00501   0.08243   0.00345
  70        3PZ        -0.00325   0.00670   0.00000  -0.08958  -0.00844
  71 7   H  1S          0.21682   0.03689   0.13549   0.16791   0.03403
  72        2S          0.41269  -0.13493  -0.01531   0.12401   0.11411
  73        3PX         0.01380   0.15943   0.02096   0.09070  -0.02124
  74        3PY         0.00112  -0.07087   0.00533   0.08253  -0.00348
  75        3PZ         0.00327   0.00694   0.00001   0.08947  -0.00846
  76 8   H  1S         -0.33679   0.00106   0.54381   0.28714  -0.00024
  77        2S         -0.29675   0.00171   0.72231   0.29729  -0.00031
  78        3PX         0.03920   0.00010   0.04307  -0.01327   0.00007
  79        3PY        -0.14387   0.00011   0.04620   0.03794  -0.00008
  80        3PZ         0.00000   0.07983  -0.00015   0.00004   0.10266
                          46        47        48        49        50
                           V         V         V         V         V
     Eigenvalues --     1.44955   1.61028   1.73089   1.78588   1.79266
   1 1   C  1S         -0.10057   0.00001   0.01652   0.00010  -0.05379
   2        2S         -1.47219   0.00004  -0.01460   0.00000  -0.03140
   3        2PX        -0.14389   0.00000  -0.12197  -0.00061   0.30005
   4        2PY         0.08099   0.00002   0.06340  -0.00016   0.06667
   5        2PZ        -0.00011  -0.04007  -0.00001  -0.04162  -0.00005
   6        3S          5.13543  -0.00022  -0.70392  -0.00349   1.90139
   7        3PX         1.26386  -0.00006  -0.06535  -0.00090   0.57764
   8        3PY        -0.21228  -0.00012  -0.54594   0.00080  -0.45584
   9        3PZ         0.00057   0.26321  -0.00004   0.52564   0.00095
  10        4XX         0.03068   0.00000   0.15099   0.00047  -0.21061
  11        4YY        -0.24551  -0.00012  -0.18261  -0.00012  -0.10593
  12        4ZZ         0.03396   0.00012   0.06009  -0.00025   0.26530
  13        4XY        -0.10631   0.00005  -0.15394   0.00083  -0.39661
  14        4XZ        -0.00006   0.23604  -0.00005   0.25366   0.00054
  15        4YZ         0.00008  -0.02929   0.00014  -0.17300  -0.00012
  16 2   C  1S          0.03542   0.00000   0.00073  -0.00001   0.00879
  17        2S          0.23653  -0.00004  -0.19559  -0.00114   0.61705
  18        2PX        -0.15277   0.00004   0.06717   0.00054  -0.25644
  19        2PY        -0.03025   0.00000  -0.05656   0.00014  -0.08110
  20        2PZ        -0.00002   0.03200   0.00000   0.00448   0.00000
  21        3S         -0.09330   0.00005  -0.15125   0.00230  -1.38162
  22        3PX         2.93223  -0.00023  -1.20307  -0.00281   1.42640
  23        3PY         0.82066   0.00008   0.53885  -0.00360   2.12746
  24        3PZ        -0.00015  -0.30459   0.00004  -0.42838  -0.00078
  25        4XX         0.02066   0.00002   0.17324   0.00097  -0.48875
  26        4YY         0.08791  -0.00002  -0.13908  -0.00054   0.26281
  27        4ZZ        -0.05274   0.00000  -0.06129  -0.00037   0.19643
  28        4XY        -0.01763   0.00002  -0.14381   0.00005   0.00517
  29        4XZ         0.00020   0.05860  -0.00002   0.49007   0.00091
  30        4YZ        -0.00049   0.11516   0.00000   0.10094   0.00017
  31 3   O  1S          0.04315   0.00000  -0.02962   0.00004  -0.02579
  32        2S          0.81470  -0.00007  -0.62589   0.00074  -0.46852
  33        2PX        -0.16670   0.00002   0.00332  -0.00023   0.12497
  34        2PY         0.28519  -0.00002  -0.23688   0.00006  -0.02299
  35        2PZ        -0.00003  -0.02859  -0.00001  -0.04222  -0.00008
  36        3S         -2.13162   0.00021   1.76818  -0.00242   1.57797
  37        3PX         0.19446  -0.00004  -0.22516   0.00123  -0.73164
  38        3PY        -1.10407   0.00007   0.73312  -0.00016   0.11026
  39        3PZ        -0.00004   0.27525   0.00002   0.05062   0.00011
  40        4XX         0.16410   0.00005  -0.74486  -0.00001  -0.03503
  41        4YY         0.42185  -0.00005   0.13269   0.00045  -0.28591
  42        4ZZ         0.06690  -0.00004   0.16312   0.00001   0.04551
  43        4XY        -0.05902   0.00003   0.01981   0.00009  -0.04436
  44        4XZ        -0.00024   0.59054   0.00005  -0.19973  -0.00039
  45        4YZ         0.00040   0.41974   0.00003  -0.03164  -0.00004
  46 4   N  1S          0.03311   0.00000  -0.00321  -0.00004   0.02432
  47        2S          0.51177  -0.00003   0.15078  -0.00024   0.12994
  48        2PX        -0.02817   0.00000   0.02570  -0.00034   0.16954
  49        2PY        -0.01071   0.00001  -0.20849  -0.00022   0.11975
  50        2PZ         0.00013  -0.01652   0.00001  -0.09976  -0.00018
  51        3S         -2.10369   0.00003  -0.16076   0.00274  -1.55538
  52        3PX        -0.20798   0.00004   0.20619   0.00030  -0.11569
  53        3PY         0.89911  -0.00003   0.06146  -0.00089   0.48362
  54        3PZ         0.00000   0.06748  -0.00002   0.18207   0.00030
  55        4XX         0.05549   0.00000   0.38282   0.00016  -0.07228
  56        4YY         0.14850  -0.00001  -0.11097   0.00019  -0.10129
  57        4ZZ         0.03875   0.00001  -0.17971  -0.00041   0.21786
  58        4XY        -0.05235  -0.00001   0.13698  -0.00069   0.34705
  59        4XZ         0.00019   0.00607  -0.00004   0.40450   0.00085
  60        4YZ         0.00025  -0.03924   0.00002  -0.43275  -0.00081
  61 5   H  1S         -0.29719   0.00005   0.07842   0.00043  -0.16402
  62        2S         -0.19776   0.00011   0.23691  -0.00013   0.11101
  63        3PX        -0.07845  -0.00005  -0.16459  -0.00022   0.04147
  64        3PY        -0.07210  -0.00006  -0.13181  -0.00004  -0.04008
  65        3PZ         0.00009  -0.04722   0.00004  -0.06318  -0.00011
  66 6   H  1S         -0.38939   0.04523   0.03555   0.14059  -0.25907
  67        2S         -0.58665   0.04291  -0.10026   0.14292  -0.06146
  68        3PX         0.05897  -0.11785   0.08587  -0.26739   0.07806
  69        3PY         0.02925   0.01637   0.00206  -0.01120   0.08558
  70        3PZ        -0.03413   0.03297  -0.04381   0.05187  -0.04328
  71 7   H  1S         -0.38946  -0.04517   0.03563  -0.13969  -0.25952
  72        2S         -0.58707  -0.04306  -0.10013  -0.14271  -0.06178
  73        3PX         0.05893   0.11787   0.08569   0.26716   0.07901
  74        3PY         0.02933  -0.01631   0.00210   0.01097   0.08570
  75        3PZ         0.03412   0.03305   0.04377   0.05183   0.04345
  76 8   H  1S         -0.07253  -0.00003   0.01027  -0.00001  -0.01806
  77        2S         -0.16534   0.00004  -0.05667   0.00017  -0.10646
  78        3PX         0.07149  -0.00004   0.19256  -0.00004   0.00752
  79        3PY        -0.07360   0.00001  -0.09129   0.00010  -0.04711
  80        3PZ        -0.00012  -0.37812  -0.00002   0.14166   0.00026
                          51        52        53        54        55
                           V         V         V         V         V
     Eigenvalues --     1.84487   1.91781   1.91810   2.03640   2.03960
   1 1   C  1S          0.00542  -0.00528  -0.00001  -0.02467  -0.00601
   2        2S         -0.19152  -0.35915  -0.00140  -0.15588  -0.09476
   3        2PX        -0.15370  -0.10503  -0.00043   0.02064  -0.00246
   4        2PY        -0.04225  -0.01556  -0.00007   0.08863  -0.03819
   5        2PZ         0.00000   0.00006  -0.02001   0.00003   0.00008
   6        3S          0.24108   0.29026   0.00085   1.11712   0.58903
   7        3PX         0.77273  -0.32061  -0.00140   0.70385   0.48774
   8        3PY        -0.94478   0.54013   0.00209  -0.60999   0.28075
   9        3PZ        -0.00003   0.00109  -0.26048  -0.00010  -0.00042
  10        4XX         0.35571  -0.13952  -0.00049  -0.13429   0.39049
  11        4YY        -0.42612   0.21834   0.00106  -0.35095  -0.07222
  12        4ZZ         0.11887  -0.03952  -0.00041   0.46454  -0.27613
  13        4XY        -0.11192   0.13436   0.00044   0.49388   0.05872
  14        4XZ        -0.00015   0.00020  -0.05559  -0.00013   0.00030
  15        4YZ         0.00032  -0.00097   0.18392   0.00092   0.00041
  16 2   C  1S          0.01952   0.03144   0.00012   0.02051  -0.00846
  17        2S          0.01199   0.39232   0.00140   0.16326  -0.36697
  18        2PX         0.16026  -0.06867  -0.00023  -0.01737   0.13087
  19        2PY        -0.09363   0.03596   0.00015  -0.06365   0.09118
  20        2PZ         0.00000  -0.00019   0.04758  -0.00002  -0.00007
  21        3S         -0.23597  -2.17838  -0.00808  -0.51237   0.49324
  22        3PX        -0.68363  -0.89901  -0.00381   0.87611   0.90260
  23        3PY         3.36098  -2.25766  -0.00874   0.72575   0.22901
  24        3PZ         0.00007  -0.00131   0.34909   0.00004   0.00002
  25        4XX         0.09087   0.04016   0.00020   0.11595   0.12007
  26        4YY        -0.11453  -0.33575  -0.00131  -0.13307   0.27518
  27        4ZZ         0.05608   0.35471   0.00135   0.01486  -0.51225
  28        4XY         0.50888  -0.03116  -0.00006  -0.34603  -0.09374
  29        4XZ        -0.00007   0.00097  -0.24185  -0.00007  -0.00006
  30        4YZ        -0.00004   0.00035  -0.08669   0.00005   0.00003
  31 3   O  1S         -0.07853   0.00734   0.00002   0.00981   0.01139
  32        2S         -0.68966   0.10828   0.00042  -0.20419  -0.11532
  33        2PX        -0.05041  -0.17812  -0.00072   0.10574   0.13933
  34        2PY         0.14431  -0.03771  -0.00014  -0.06717  -0.12759
  35        2PZ        -0.00001  -0.00029   0.07923  -0.00002  -0.00004
  36        3S          3.20257  -0.41893  -0.00156   0.37591  -0.18368
  37        3PX        -0.81258   0.49741   0.00197  -0.22445  -0.21723
  38        3PY         0.28822   0.46893   0.00188  -0.24232  -0.22025
  39        3PZ         0.00005   0.00059  -0.16190   0.00004   0.00007
  40        4XX        -0.22072  -0.36364  -0.00141   0.04568   0.09468
  41        4YY        -0.40032   0.25499   0.00102  -0.05957   0.16427
  42        4ZZ         0.10092   0.20372   0.00073  -0.01494  -0.28794
  43        4XY         0.10036   0.05781   0.00024  -0.10217  -0.01898
  44        4XZ        -0.00003  -0.00105   0.28780  -0.00013  -0.00020
  45        4YZ         0.00004   0.00089  -0.23250   0.00008   0.00010
  46 4   N  1S          0.03334  -0.04050  -0.00016   0.00709   0.00462
  47        2S          0.35170  -0.36885  -0.00140   0.20463   0.14192
  48        2PX        -0.11209  -0.11050  -0.00045   0.01054   0.08517
  49        2PY         0.14676  -0.21160  -0.00081  -0.17539   0.08389
  50        2PZ         0.00003  -0.00027   0.06913   0.00002  -0.00002
  51        3S         -2.51775   2.91277   0.01122  -0.73908  -0.75026
  52        3PX         0.75084  -0.22087  -0.00076  -0.10561  -0.13402
  53        3PY         0.63470  -0.98245  -0.00380   0.35294   0.32000
  54        3PZ        -0.00008   0.00066  -0.16192  -0.00005   0.00003
  55        4XX        -0.29461  -0.55838  -0.00219   0.01977  -0.34660
  56        4YY         0.22109  -0.11595  -0.00042  -0.04971  -0.13998
  57        4ZZ         0.19205   0.59056   0.00227   0.15221   0.42440
  58        4XY        -0.16114   0.03357   0.00013   0.03596   0.51447
  59        4XZ        -0.00007  -0.00324   0.84106   0.00008  -0.00010
  60        4YZ         0.00013  -0.00001  -0.00242   0.00004  -0.00008
  61 5   H  1S          0.21649  -0.16037  -0.00070   0.55118  -0.04980
  62        2S          0.37940  -0.26546  -0.00107  -0.01975  -0.01424
  63        3PX        -0.09940   0.13441   0.00059  -0.18979  -0.11789
  64        3PY        -0.03350   0.09054   0.00040   0.17563  -0.07418
  65        3PZ         0.00000  -0.00025   0.06483   0.00031   0.00031
  66 6   H  1S         -0.03003  -0.04471  -0.16139  -0.35110   0.12742
  67        2S         -0.09564  -0.03660   0.01427  -0.00215   0.00171
  68        3PX        -0.08125   0.04607   0.14525  -0.02848  -0.09522
  69        3PY         0.04816  -0.03687   0.01333   0.19523  -0.02822
  70        3PZ        -0.06178   0.03537   0.00433   0.02036  -0.03120
  71 7   H  1S         -0.02991  -0.04616   0.16121  -0.35041   0.12816
  72        2S         -0.09539  -0.03664  -0.01461  -0.00220   0.00157
  73        3PX        -0.08143   0.04726  -0.14496  -0.02842  -0.09500
  74        3PY         0.04835  -0.03686  -0.01368   0.19466  -0.02854
  75        3PZ         0.06177  -0.03545   0.00402  -0.02051   0.03146
  76 8   H  1S         -0.23708   0.13810   0.00052  -0.04811  -0.22093
  77        2S         -0.07562   0.07430   0.00032  -0.23611  -0.01717
  78        3PX        -0.08527   0.13224   0.00054  -0.19308  -0.00844
  79        3PY         0.04087  -0.04697  -0.00019   0.09944   0.02294
  80        3PZ         0.00000   0.00013  -0.03620   0.00001   0.00002
                          56        57        58        59        60
                           V         V         V         V         V
     Eigenvalues --     2.06018   2.09924   2.24622   2.25249   2.36178
   1 1   C  1S          0.00002   0.00002  -0.00004  -0.02531  -0.07961
   2        2S          0.00017   0.00011  -0.00027  -0.15547  -0.36810
   3        2PX        -0.00004  -0.00007   0.00014   0.09582   0.21813
   4        2PY        -0.00003   0.00002  -0.00009  -0.13361   0.03965
   5        2PZ         0.06011   0.11848   0.03703   0.00001   0.00005
   6        3S         -0.00125  -0.00107   0.00173   1.07231   2.84559
   7        3PX        -0.00074  -0.00067   0.00060   0.33178   1.44734
   8        3PY        -0.00001  -0.00013   0.00063   0.71083   0.46048
   9        3PZ        -0.30058  -0.51930  -0.47610   0.00030  -0.00003
  10        4XX        -0.00014  -0.00028   0.00017   0.04930   0.53292
  11        4YY         0.00049   0.00065   0.00011   0.13818  -0.21791
  12        4ZZ        -0.00036  -0.00038  -0.00028  -0.19884  -0.30741
  13        4XY        -0.00040  -0.00016   0.00011   0.10327   0.14839
  14        4XZ         0.12332   0.22266  -0.23229   0.00024   0.00008
  15        4YZ         0.31879   0.58522  -0.00098  -0.00018  -0.00005
  16 2   C  1S         -0.00001  -0.00001   0.00003   0.02201   0.09370
  17        2S          0.00009   0.00011   0.00044   0.29745   0.40780
  18        2PX        -0.00004  -0.00011   0.00010   0.05989   0.32310
  19        2PY        -0.00007  -0.00002  -0.00009  -0.14588   0.06839
  20        2PZ        -0.04354  -0.07375   0.18008  -0.00015  -0.00005
  21        3S          0.00030   0.00021  -0.00113  -0.34467  -2.21193
  22        3PX        -0.00131  -0.00109   0.00126   0.94657   2.10504
  23        3PY        -0.00017  -0.00063   0.00006   0.19158  -0.44328
  24        3PZ         0.05099   0.07019   0.50194  -0.00033   0.00000
  25        4XX        -0.00014   0.00001  -0.00004   0.04487  -0.35134
  26        4YY        -0.00007  -0.00019  -0.00009  -0.15009  -0.11984
  27        4ZZ         0.00028   0.00025   0.00013   0.11699   0.69784
  28        4XY         0.00033   0.00004  -0.00032  -0.36300  -0.02661
  29        4XZ        -0.03544  -0.06640   0.39805  -0.00034  -0.00018
  30        4YZ         0.02007   0.04341  -0.01677   0.00000  -0.00002
  31 3   O  1S         -0.00002  -0.00001   0.00003   0.02951   0.00593
  32        2S          0.00021   0.00012   0.00016   0.11805   0.49766
  33        2PX        -0.00017  -0.00012   0.00005   0.07036  -0.10891
  34        2PY         0.00010   0.00005  -0.00006  -0.05816   0.12967
  35        2PZ        -0.01282  -0.03808   0.08569  -0.00007   0.00001
  36        3S          0.00001  -0.00009  -0.00066  -0.58502  -1.18499
  37        3PX         0.00027   0.00031   0.00001   0.01816   0.22923
  38        3PY         0.00039   0.00023  -0.00021  -0.25644  -0.46271
  39        3PZ         0.02527   0.07245  -0.35937   0.00026   0.00003
  40        4XX        -0.00012  -0.00012   0.00021   0.20981   0.05502
  41        4YY        -0.00012   0.00000  -0.00031  -0.32803  -0.09417
  42        4ZZ         0.00028   0.00013   0.00030   0.29320   0.17131
  43        4XY         0.00010   0.00005  -0.00013  -0.10534  -0.06277
  44        4XZ        -0.10844  -0.18894   0.38755  -0.00027  -0.00010
  45        4YZ         0.06613   0.12763  -0.40387   0.00029   0.00005
  46 4   N  1S          0.00000  -0.00001   0.00001   0.00823  -0.00099
  47        2S         -0.00015  -0.00011   0.00017   0.30899   0.10781
  48        2PX        -0.00007  -0.00007  -0.00003  -0.07695  -0.01157
  49        2PY         0.00008  -0.00008  -0.00014  -0.17860  -0.10560
  50        2PZ        -0.00437  -0.01635   0.03661   0.00000   0.00000
  51        3S          0.00055   0.00080  -0.00029  -0.66772   0.19486
  52        3PX         0.00028   0.00014  -0.00014   0.03953  -0.48041
  53        3PY        -0.00032  -0.00029   0.00019   0.32761   0.13085
  54        3PZ         0.00375   0.02358  -0.26491   0.00016   0.00005
  55        4XX         0.00016   0.00007  -0.00002  -0.09989   0.40730
  56        4YY         0.00016   0.00010  -0.00001   0.07141  -0.38113
  57        4ZZ        -0.00036  -0.00013   0.00014   0.14970   0.00235
  58        4XY        -0.00035  -0.00038  -0.00002  -0.10458   0.29288
  59        4XZ        -0.04465  -0.06690  -0.03101   0.00003  -0.00003
  60        4YZ        -0.04294  -0.06762   0.58944  -0.00046  -0.00015
  61 5   H  1S         -0.00034  -0.00017  -0.00017  -0.18215  -0.09712
  62        2S          0.00009   0.00001  -0.00035  -0.25376  -0.05247
  63        3PX         0.00014   0.00011  -0.00050  -0.42316  -0.01264
  64        3PY         0.00017  -0.00010  -0.00036  -0.45464   0.01391
  65        3PZ         0.61660  -0.08744   0.22237  -0.00010   0.00007
  66 6   H  1S         -0.23855  -0.43234  -0.04142   0.03867  -0.04028
  67        2S          0.01470   0.05299  -0.16776   0.09608  -0.09225
  68        3PX        -0.16944  -0.00345  -0.33165   0.27799  -0.32531
  69        3PY         0.43455  -0.19567  -0.11647  -0.22932  -0.05674
  70        3PZ        -0.10935   0.42707   0.18858  -0.00260  -0.00062
  71 7   H  1S          0.23890   0.43244   0.04144   0.03851  -0.04026
  72        2S         -0.01475  -0.05294   0.16789   0.09570  -0.09226
  73        3PX         0.16963   0.00366   0.33214   0.27709  -0.32529
  74        3PY        -0.43490   0.19590   0.11622  -0.22964  -0.05664
  75        3PZ        -0.10893   0.42689   0.18854   0.00232   0.00079
  76 8   H  1S          0.00017   0.00015   0.00024   0.23120   0.17053
  77        2S          0.00026   0.00004   0.00000  -0.03821  -0.13059
  78        3PX         0.00012   0.00006  -0.00022  -0.25999  -0.11940
  79        3PY        -0.00010  -0.00002   0.00002   0.04885   0.02876
  80        3PZ         0.00222   0.00982   0.13433  -0.00009  -0.00007
                          61        62        63        64        65
                           V         V         V         V         V
     Eigenvalues --     2.45963   2.51858   2.54843   2.60068   2.64129
   1 1   C  1S         -0.00653  -0.00002   0.02308   0.00000  -0.00669
   2        2S         -0.01727  -0.00004  -0.05237   0.00003   0.12650
   3        2PX        -0.03291   0.00006  -0.12402   0.00003   0.08403
   4        2PY         0.13883   0.00009  -0.12681  -0.00012  -0.12631
   5        2PZ        -0.00005   0.08674   0.00005  -0.08231   0.00003
   6        3S         -0.38276   0.00061  -0.60127  -0.00010  -0.26870
   7        3PX        -0.05341   0.00030  -0.40365  -0.00006   0.46163
   8        3PY         0.08915   0.00042  -0.56933   0.00016  -0.45393
   9        3PZ         0.00008   0.53964   0.00040  -0.03553   0.00002
  10        4XX         0.15387   0.00008   0.08238   0.00002  -0.01911
  11        4YY        -0.04230   0.00018   0.02713  -0.00006  -0.03351
  12        4ZZ        -0.04606  -0.00024  -0.11654   0.00003   0.05524
  13        4XY         0.25575   0.00021  -0.34168  -0.00010  -0.29332
  14        4XZ        -0.00005   0.29716   0.00024  -0.16176   0.00006
  15        4YZ         0.00009   0.33288   0.00001   0.00045  -0.00001
  16 2   C  1S         -0.00938   0.00004  -0.03756   0.00000   0.05164
  17        2S         -0.28332  -0.00004  -0.12074   0.00001  -0.32680
  18        2PX         0.11515   0.00009  -0.04473  -0.00005  -0.24091
  19        2PY         0.13751   0.00000   0.02862   0.00020   0.65591
  20        2PZ         0.00000   0.02884   0.00001   0.05835   0.00000
  21        3S         -0.49961  -0.00115   1.86310   0.00004  -0.59774
  22        3PX        -0.69018   0.00024  -0.23185  -0.00005  -0.74841
  23        3PY        -1.32394  -0.00033   0.20435   0.00002   1.76989
  24        3PZ        -0.00003   0.03186  -0.00005  -0.00204   0.00003
  25        4XX        -0.29775  -0.00028   0.37615   0.00002  -0.11385
  26        4YY         0.40366   0.00006  -0.18261   0.00001   0.03801
  27        4ZZ        -0.17713   0.00037  -0.30314   0.00000   0.36931
  28        4XY         0.02768   0.00016  -0.17682   0.00001  -0.10988
  29        4XZ        -0.00007   0.56613   0.00035  -0.27333   0.00011
  30        4YZ         0.00001   0.20214   0.00006   0.88165  -0.00015
  31 3   O  1S          0.03062  -0.00002   0.02097   0.00000  -0.03610
  32        2S          0.34869  -0.00005   0.32347  -0.00010  -0.86630
  33        2PX        -0.15013   0.00000  -0.10222   0.00002   0.07269
  34        2PY        -0.19826   0.00015  -0.17077  -0.00006  -0.16653
  35        2PZ         0.00000   0.00064   0.00001  -0.02338   0.00001
  36        3S         -0.97999   0.00028  -0.79992   0.00020   2.63733
  37        3PX         0.55372  -0.00015   0.43891  -0.00010  -0.88741
  38        3PY         0.71688  -0.00001  -0.04541   0.00014   0.99118
  39        3PZ         0.00002  -0.16045  -0.00014   0.19499  -0.00001
  40        4XX         0.03508   0.00004  -0.08821   0.00001   0.13944
  41        4YY        -0.25386   0.00002  -0.05139   0.00005   0.16849
  42        4ZZ         0.49713  -0.00024   0.32277  -0.00006  -0.50912
  43        4XY        -0.40051   0.00019  -0.39951  -0.00009  -0.40722
  44        4XZ        -0.00002   0.18522   0.00020  -0.38485   0.00004
  45        4YZ         0.00007   0.02879   0.00005   0.47818  -0.00008
  46 4   N  1S         -0.00714  -0.00002   0.01121   0.00001   0.01467
  47        2S         -0.52191  -0.00007   0.25514   0.00008   0.44290
  48        2PX         0.07174  -0.00002  -0.02609  -0.00001  -0.02413
  49        2PY         0.19131   0.00001  -0.07761  -0.00001  -0.06502
  50        2PZ        -0.00001   0.00657  -0.00001  -0.04864   0.00001
  51        3S          1.69313   0.00063  -0.92047  -0.00021  -1.49776
  52        3PX        -0.14823  -0.00011   0.16184   0.00007   0.63878
  53        3PY        -0.73218  -0.00025   0.42589   0.00014   0.58565
  54        3PZ         0.00004  -0.15353  -0.00005  -0.16641  -0.00001
  55        4XX        -0.16644   0.00001   0.02460   0.00005  -0.13558
  56        4YY         0.16396   0.00003  -0.07133  -0.00009  -0.09246
  57        4ZZ        -0.04371  -0.00014   0.10896   0.00008   0.21557
  58        4XY        -0.10190   0.00008  -0.04572  -0.00009  -0.59711
  59        4XZ         0.00003   0.01623  -0.00002   0.32808  -0.00004
  60        4YZ        -0.00004   0.39096   0.00017   0.55949  -0.00005
  61 5   H  1S          0.08596  -0.00001  -0.05390  -0.00002   0.01279
  62        2S         -0.06893  -0.00006   0.31919  -0.00003   0.38984
  63        3PX        -0.11998  -0.00004   0.48591   0.00008  -0.10566
  64        3PY         0.10163  -0.00020   0.16244  -0.00009  -0.19774
  65        3PZ        -0.00014  -0.47840  -0.00019  -0.04506   0.00014
  66 6   H  1S          0.00092  -0.05814   0.03691   0.01326  -0.00004
  67        2S          0.02667   0.34057  -0.20282  -0.07184  -0.02167
  68        3PX        -0.03617   0.26191  -0.01024  -0.15738  -0.33359
  69        3PY        -0.00659   0.27743   0.19067  -0.04897   0.03323
  70        3PZ         0.04051  -0.15372  -0.17015  -0.05391  -0.04991
  71 7   H  1S          0.00098   0.05809   0.03693  -0.01322  -0.00002
  72        2S          0.02650  -0.34054  -0.20309   0.07190  -0.02152
  73        3PX        -0.03618  -0.26203  -0.01051   0.15736  -0.33359
  74        3PY        -0.00661  -0.27765   0.19065   0.04866   0.03327
  75        3PZ        -0.04049  -0.15359   0.16985  -0.05399   0.04977
  76 8   H  1S          0.79391  -0.00017   0.43287  -0.00002  -0.15536
  77        2S         -0.08384  -0.00002  -0.10234   0.00005   0.07970
  78        3PX         0.25830   0.00036  -0.53274  -0.00003   0.16700
  79        3PY        -0.52215  -0.00002  -0.00033  -0.00002  -0.14377
  80        3PZ        -0.00004   0.32243   0.00026   0.07241  -0.00001
                          66        67        68        69        70
                           V         V         V         V         V
     Eigenvalues --     2.76764   2.78197   2.85463   2.88713   2.94653
   1 1   C  1S          0.00000   0.01006   0.04587   0.00242   0.00001
   2        2S          0.00003   0.04623  -0.28969   0.19047  -0.00009
   3        2PX         0.00001   0.03022  -0.10779   0.01655  -0.00003
   4        2PY         0.00001   0.02584   0.05165  -0.06474   0.00000
   5        2PZ        -0.03686   0.00003  -0.00003   0.00010   0.00230
   6        3S         -0.00001  -0.64386  -0.32984  -0.41742  -0.00007
   7        3PX         0.00010   0.09936   0.12855  -0.49332   0.00009
   8        3PY         0.00004   0.22608   0.37355   0.55128  -0.00022
   9        3PZ        -0.24620   0.00000   0.00013  -0.00034  -0.29639
  10        4XX        -0.00010  -0.34633  -0.39949   0.04410  -0.00015
  11        4YY        -0.00009   0.28005   0.06593  -0.52741  -0.00036
  12        4ZZ         0.00018   0.04273   0.49937   0.35733   0.00057
  13        4XY         0.00005  -0.10157  -0.26714  -0.01332   0.00021
  14        4XZ         0.07170   0.00001  -0.00003   0.00003   0.71584
  15        4YZ        -0.14741  -0.00013   0.00032   0.00036  -0.41074
  16 2   C  1S          0.00000  -0.00064  -0.06260   0.03783  -0.00001
  17        2S          0.00006  -0.29056   0.52617  -0.54476   0.00005
  18        2PX         0.00000  -0.22220   0.14096  -0.41960   0.00007
  19        2PY        -0.00005  -0.60364   0.25832   0.18444  -0.00008
  20        2PZ        -0.04988   0.00002  -0.00003   0.00000  -0.03518
  21        3S         -0.00018  -1.38724   1.67900  -1.37079   0.00029
  22        3PX         0.00007  -0.68591   0.57075  -0.77193   0.00005
  23        3PY        -0.00013  -1.57663  -0.14968  -0.43797  -0.00001
  24        3PZ         0.13616   0.00004  -0.00004   0.00015   0.16475
  25        4XX        -0.00001  -0.03134   0.27191   0.05217   0.00012
  26        4YY         0.00002  -0.25250   0.21840  -0.41403   0.00002
  27        4ZZ        -0.00004   0.13945  -0.60508   0.37114  -0.00017
  28        4XY        -0.00002  -0.20220   0.28967   0.38501  -0.00005
  29        4XZ        -0.18063   0.00004   0.00008   0.00008   0.26634
  30        4YZ        -0.14651   0.00013  -0.00011  -0.00012   0.27809
  31 3   O  1S          0.00001  -0.01181   0.01157  -0.04125   0.00002
  32        2S          0.00003   0.23609   0.46721  -0.38845   0.00004
  33        2PX         0.00001  -0.07612  -0.07422  -0.06428   0.00002
  34        2PY         0.00001  -0.00955  -0.00797  -0.08077   0.00002
  35        2PZ        -0.00322   0.00001   0.00000   0.00001   0.01762
  36        3S         -0.00014  -0.44046  -1.26409   1.41428  -0.00035
  37        3PX         0.00003   0.55136   0.39723  -0.45433   0.00007
  38        3PY        -0.00004   0.06358  -0.47386   0.76855  -0.00012
  39        3PZ        -0.32751   0.00000  -0.00003  -0.00003   0.00433
  40        4XX         0.00004  -0.47098  -0.04828  -0.03318   0.00014
  41        4YY         0.00000   0.24824  -0.09546   0.39460  -0.00015
  42        4ZZ         0.00000   0.08637   0.21309  -0.42598   0.00016
  43        4XY         0.00008  -0.10484   0.11197  -0.62016   0.00011
  44        4XZ         0.44561  -0.00003   0.00004   0.00003  -0.11821
  45        4YZ         0.63459  -0.00001  -0.00010  -0.00005  -0.13119
  46 4   N  1S          0.00000  -0.04908   0.04644  -0.02407   0.00001
  47        2S         -0.00008  -0.52429   0.18261  -0.25030  -0.00003
  48        2PX         0.00001  -0.04658   0.03860  -0.04745   0.00000
  49        2PY         0.00001  -0.15349   0.18269  -0.08205   0.00001
  50        2PZ         0.02303   0.00000   0.00001   0.00002  -0.02076
  51        3S          0.00020   2.68157  -1.26850   1.35108  -0.00008
  52        3PX        -0.00006  -0.33604   0.07076  -0.13550  -0.00002
  53        3PY        -0.00009  -1.33763   0.77629  -0.66779   0.00002
  54        3PZ        -0.00161   0.00001  -0.00001  -0.00001  -0.11491
  55        4XX         0.00000  -0.38144   0.32814  -0.05255   0.00003
  56        4YY         0.00003   0.82024  -0.65616   0.25577   0.00002
  57        4ZZ         0.00000  -0.42032   0.40497  -0.18169   0.00002
  58        4XY         0.00002   0.32855  -0.12276   0.28623   0.00003
  59        4XZ        -0.01887   0.00002  -0.00003  -0.00005   0.02701
  60        4YZ        -0.13614   0.00005   0.00000  -0.00005   0.24828
  61 5   H  1S          0.00000  -0.00433  -0.04586   0.04264   0.00001
  62        2S         -0.00004   0.08429  -0.01814  -0.41050   0.00009
  63        3PX        -0.00012  -0.27200  -0.15721   0.22100  -0.00001
  64        3PY         0.00008  -0.25116  -0.16226   0.11206   0.00028
  65        3PZ         0.25388   0.00005  -0.00014   0.00002   0.64380
  66 6   H  1S         -0.01321   0.03263   0.02052   0.03732  -0.00505
  67        2S         -0.11330   0.12335   0.20707   0.15504  -0.13568
  68        3PX         0.05008  -0.36177  -0.27073   0.15837   0.41469
  69        3PY        -0.11558   0.09702  -0.18949  -0.43300  -0.23327
  70        3PZ         0.03208   0.08640   0.37223   0.23853   0.05177
  71 7   H  1S          0.01320   0.03261   0.02052   0.03723   0.00504
  72        2S          0.11344   0.12331   0.20675   0.15514   0.13566
  73        3PX        -0.05021  -0.36172  -0.27063   0.15834  -0.41489
  74        3PY         0.11552   0.09693  -0.18997  -0.43326   0.23326
  75        3PZ         0.03185  -0.08650  -0.37218  -0.23802   0.05135
  76 8   H  1S          0.00001   0.16845   0.10458  -0.04220   0.00006
  77        2S          0.00000  -0.05618  -0.07299   0.05064  -0.00006
  78        3PX         0.00007  -0.32833  -0.15707  -0.25176   0.00016
  79        3PY         0.00001   0.19277  -0.05821  -0.04736  -0.00006
  80        3PZ         0.99888  -0.00005  -0.00003   0.00001  -0.17096
                          71        72        73        74        75
                           V         V         V         V         V
     Eigenvalues --     3.07649   3.20680   3.31541   3.52689   3.53946
   1 1   C  1S          0.04178   0.05295  -0.09681   0.00000  -0.00201
   2        2S         -0.28810  -0.50835   0.64324   0.00002  -0.00336
   3        2PX        -0.04835   0.10632  -0.48770   0.00005  -0.19582
   4        2PY         0.04127  -0.06765  -0.14694  -0.00002   0.81916
   5        2PZ         0.00004  -0.00002   0.00002  -0.86971   0.00000
   6        3S          0.01732   0.09970   1.05104   0.00016   0.16806
   7        3PX         0.21189   0.35037  -0.27452   0.00010  -0.09600
   8        3PY        -0.25523   0.04553  -0.05864  -0.00001   0.68228
   9        3PZ         0.00002   0.00010   0.00003  -0.65103  -0.00005
  10        4XX        -0.28359   0.16466  -0.63438   0.00012   0.42356
  11        4YY         0.53727  -0.18380   0.21017   0.00090   0.29642
  12        4ZZ        -0.15677   0.25458   0.25650  -0.00108  -0.74570
  13        4XY         0.17456  -0.12611  -0.29617  -0.00025  -0.87779
  14        4XZ        -0.00005  -0.00014  -0.00004   0.44066   0.00029
  15        4YZ        -0.00041   0.00031   0.00000   1.07263  -0.00108
  16 2   C  1S          0.03100   0.02955   0.00279   0.00003   0.02383
  17        2S         -0.27062  -0.22907  -0.09251   0.00000  -0.03992
  18        2PX        -0.27184   0.02415  -0.13390  -0.00001  -0.02471
  19        2PY         0.25704  -0.44206  -0.18379  -0.00002  -0.00915
  20        2PZ         0.00002   0.00000  -0.00001   0.00439   0.00000
  21        3S         -0.64711  -0.86481  -0.02904  -0.00072  -0.43030
  22        3PX         0.01276   0.45232   0.19072  -0.00002   0.08632
  23        3PY         0.86316  -0.75634  -0.21201   0.00025   0.10739
  24        3PZ        -0.00001  -0.00003   0.00002   0.08162   0.00002
  25        4XX         0.37645   0.64894   0.51147  -0.00002   0.08095
  26        4YY        -0.47198  -0.64118  -0.31457  -0.00002  -0.10231
  27        4ZZ         0.25657   0.15769   0.00122   0.00021   0.16411
  28        4XY         0.80826  -0.56951  -0.03385  -0.00001  -0.11821
  29        4XZ        -0.00007  -0.00003   0.00001   0.04702  -0.00002
  30        4YZ         0.00006  -0.00004   0.00001  -0.08157   0.00011
  31 3   O  1S         -0.04874   0.02934  -0.02949  -0.00009  -0.00772
  32        2S         -0.25295   0.07335   0.12161  -0.00002  -0.09242
  33        2PX        -0.15999   0.03086  -0.06678  -0.00009  -0.00258
  34        2PY        -0.01634   0.00102  -0.08479  -0.00016  -0.04938
  35        2PZ         0.00001   0.00000   0.00001   0.00618  -0.00001
  36        3S          1.51336  -0.58582   0.11341   0.00124   0.37485
  37        3PX        -0.69094  -0.11345  -0.14839  -0.00033  -0.21254
  38        3PY         0.40674  -0.39813  -0.29011  -0.00014  -0.04308
  39        3PZ         0.00006   0.00000  -0.00001  -0.03885   0.00004
  40        4XX         0.27379   0.65294   0.16614  -0.00020   0.09704
  41        4YY         0.08281  -0.60257  -0.21411   0.00002  -0.01576
  42        4ZZ        -0.35129   0.11778  -0.13191  -0.00039  -0.08412
  43        4XY        -0.38049   0.29091   0.19980   0.00022   0.05140
  44        4XZ        -0.00007  -0.00001  -0.00001   0.01969  -0.00005
  45        4YZ         0.00007  -0.00002  -0.00003  -0.04796   0.00003
  46 4   N  1S         -0.01530  -0.01064   0.01405  -0.00003  -0.03732
  47        2S          0.15916  -0.12317  -0.06920   0.00007   0.19241
  48        2PX        -0.06395  -0.11534  -0.04524  -0.00001  -0.02176
  49        2PY         0.00833  -0.30748  -0.11629  -0.00003  -0.06403
  50        2PZ         0.00000   0.00001   0.00001  -0.00237   0.00000
  51        3S         -0.41660   1.05352   0.16176   0.00021   0.12744
  52        3PX        -0.04481  -0.32873  -0.15789   0.00000   0.02992
  53        3PY         0.18682  -0.55543  -0.08310  -0.00008  -0.02430
  54        3PZ        -0.00001   0.00005  -0.00002   0.01656  -0.00004
  55        4XX         0.19436  -0.08542   0.08298  -0.00009  -0.16531
  56        4YY        -0.29877   0.51361   0.14546  -0.00003  -0.03296
  57        4ZZ        -0.06619  -0.13695   0.02354  -0.00011  -0.12935
  58        4XY         0.37737   0.38363   0.21307   0.00000  -0.00791
  59        4XZ         0.00001  -0.00003   0.00000  -0.04118   0.00003
  60        4YZ         0.00002  -0.00007   0.00000  -0.02624   0.00004
  61 5   H  1S          0.06456   0.11550  -0.33088  -0.00028  -0.73655
  62        2S          0.13927   0.25638  -0.36873  -0.00027  -0.62442
  63        3PX        -0.21509   0.34617  -0.41562  -0.00028  -0.65811
  64        3PY        -0.28875  -0.22484   0.53437   0.00038   0.90856
  65        3PZ         0.00016   0.00002  -0.00030   0.03763  -0.00047
  66 6   H  1S         -0.00419   0.02946  -0.33662  -0.64900   0.37798
  67        2S          0.07644   0.09514  -0.36034  -0.51669   0.32119
  68        3PX         0.09124  -0.10148  -0.18782  -0.22088   0.14080
  69        3PY         0.35483   0.02714  -0.38132  -0.58714   0.27127
  70        3PZ        -0.05747   0.23578  -0.54066  -0.78424   0.50534
  71 7   H  1S         -0.00423   0.02953  -0.33664   0.64932   0.37740
  72        2S          0.07648   0.09509  -0.36037   0.51702   0.32080
  73        3PX         0.09111  -0.10117  -0.18788   0.22123   0.14075
  74        3PY         0.35484   0.02694  -0.38087   0.58671   0.27032
  75        3PZ         0.05728  -0.23588   0.54097  -0.78516  -0.50487
  76 8   H  1S         -0.18838  -0.05295  -0.25514  -0.00046  -0.14860
  77        2S         -0.14160  -0.20984  -0.15352  -0.00019  -0.01927
  78        3PX        -0.00474   0.51361   0.03403  -0.00026  -0.06590
  79        3PY        -0.36034  -0.33589  -0.33125  -0.00034  -0.08621
  80        3PZ         0.00001  -0.00001  -0.00001  -0.01305   0.00002
                          76        77        78        79        80
                           V         V         V         V         V
     Eigenvalues --     3.61524   3.93394   4.14579   4.34823   4.69493
   1 1   C  1S          0.00406  -0.01499   0.00451  -0.25631  -0.41788
   2        2S          0.00060   0.36776   0.15828   1.47858   2.31803
   3        2PX         0.15993   0.02083   0.00824   0.16500   0.03643
   4        2PY        -0.01885  -0.04560   0.01636   0.06861   0.01889
   5        2PZ         0.00028   0.00003   0.00003  -0.00002  -0.00001
   6        3S          0.01826  -0.82904  -0.47943   0.81425   2.63620
   7        3PX         0.27463  -0.60784   0.05266   0.00362   0.39899
   8        3PY        -0.18479   0.20931  -0.56812  -0.23424   0.15557
   9        3PZ         0.00027  -0.00019  -0.00008   0.00010   0.00006
  10        4XX         0.13329  -0.19331   0.02559  -0.77725  -1.79787
  11        4YY        -0.16801  -0.14774  -0.10057  -1.10698  -1.76106
  12        4ZZ        -0.00345   0.02005  -0.05919  -1.15858  -1.74508
  13        4XY         0.13409   0.08189  -0.10716   0.04473   0.04491
  14        4XZ        -0.00014  -0.00004   0.00000   0.00002  -0.00002
  15        4YZ        -0.00027   0.00009  -0.00008  -0.00001   0.00001
  16 2   C  1S          0.01567  -0.09656   0.00548  -0.37999   0.24821
  17        2S          0.12492   0.61109  -0.25944   2.43521  -1.54984
  18        2PX         0.15062   0.05171  -0.04035  -0.14499   0.02233
  19        2PY        -0.10306   0.17024   0.03338  -0.03511  -0.01605
  20        2PZ        -0.00001   0.00000   0.00000   0.00001  -0.00002
  21        3S         -0.55340  -1.69411  -0.56657   0.90875  -0.97447
  22        3PX         0.09347  -1.35019  -1.09217  -0.21403   0.91221
  23        3PY         0.52631  -1.93092   2.36220   0.62760  -0.28718
  24        3PZ        -0.00004   0.00008   0.00004  -0.00003   0.00002
  25        4XX        -0.15542  -0.25872   0.13754  -1.48624   1.26429
  26        4YY         0.27162  -0.31554   0.00429  -1.90105   1.20896
  27        4ZZ         0.08718  -0.31836   0.11899  -1.40690   0.87260
  28        4XY        -0.25494   0.04099  -0.02357   0.05257   0.03045
  29        4XZ         0.00000  -0.00001  -0.00001   0.00002   0.00000
  30        4YZ         0.00003  -0.00001   0.00000   0.00000   0.00000
  31 3   O  1S         -0.19615  -0.09147  -0.51834  -0.01108   0.05145
  32        2S          0.07250   0.05113  -0.51085  -0.14852   0.22564
  33        2PX        -0.23015   0.06162   0.35751  -0.09380   0.01128
  34        2PY        -0.51369   0.13165   0.13485   0.03214  -0.00085
  35        2PZ         0.00001   0.00000  -0.00002   0.00000   0.00000
  36        3S          2.66524   0.46015   5.97245   0.55145  -1.00442
  37        3PX        -0.68147   0.29939  -0.88674  -0.32697   0.29953
  38        3PY        -0.95432   0.58038   1.19136   0.25811  -0.41434
  39        3PZ         0.00006  -0.00003   0.00004   0.00003  -0.00003
  40        4XX        -0.54283  -0.37431  -1.65416   0.16702   0.04337
  41        4YY         0.10047  -0.48955  -1.99640   0.18175  -0.03231
  42        4ZZ        -0.90841  -0.20425  -1.72802  -0.13052   0.28163
  43        4XY         0.98309  -0.28896  -0.51809  -0.17639   0.16125
  44        4XZ        -0.00004   0.00002   0.00000  -0.00002   0.00001
  45        4YZ        -0.00005   0.00002   0.00003   0.00001  -0.00001
  46 4   N  1S         -0.05728  -0.45740   0.14832   0.09685  -0.01411
  47        2S          0.20081   0.89414  -0.08817  -0.10522   0.07679
  48        2PX         0.02954   0.04103  -0.03256  -0.10879   0.03532
  49        2PY         0.02937   0.12782  -0.09094  -0.26917   0.14618
  50        2PZ         0.00000   0.00000   0.00000   0.00001   0.00000
  51        3S          0.05525   4.63064  -2.14388  -1.10483   0.12383
  52        3PX         0.09790  -0.33252   0.57671   0.17226  -0.12309
  53        3PY        -0.01699  -1.40971   0.56890   0.16406   0.14379
  54        3PZ        -0.00001   0.00003  -0.00004   0.00000  -0.00001
  55        4XX        -0.25911  -1.47762   0.37070   0.30562  -0.05331
  56        4YY        -0.12760  -1.27659   0.42733   0.57570  -0.30305
  57        4ZZ        -0.19723  -1.47096   0.52142   0.27835   0.01513
  58        4XY        -0.14480   0.06106  -0.09524   0.09998  -0.03911
  59        4XZ         0.00002   0.00000   0.00001   0.00000   0.00000
  60        4YZ         0.00001  -0.00001   0.00000  -0.00001   0.00001
  61 5   H  1S          0.15167   0.09935   0.05904   0.15519   0.18564
  62        2S          0.17898  -0.22723   0.19547  -0.09587  -0.31573
  63        3PX         0.12909   0.05602  -0.03730   0.07254   0.16384
  64        3PY        -0.14486  -0.01896  -0.00196  -0.13012  -0.25063
  65        3PZ         0.00010   0.00002   0.00006   0.00006   0.00012
  66 6   H  1S         -0.00867   0.00955   0.02734   0.17300   0.15831
  67        2S          0.09542   0.00273   0.02470  -0.26197  -0.30277
  68        3PX         0.05300  -0.01761   0.07174   0.01028   0.03491
  69        3PY         0.03220  -0.06824   0.07052   0.11853   0.14286
  70        3PZ         0.04435  -0.02224   0.01486   0.13575   0.22530
  71 7   H  1S         -0.00906   0.00957   0.02730   0.17302   0.15830
  72        2S          0.09506   0.00286   0.02491  -0.26204  -0.30284
  73        3PX         0.05282  -0.01755   0.07169   0.01029   0.03496
  74        3PY         0.03186  -0.06816   0.07048   0.11839   0.14266
  75        3PZ        -0.04390   0.02229  -0.01484  -0.13585  -0.22540
  76 8   H  1S         -1.44275   0.50724   0.66560  -0.11934   0.05886
  77        2S         -0.84874   0.02019  -0.19928  -0.03859  -0.05119
  78        3PX        -0.69741   0.29151   0.45706   0.03755  -0.00684
  79        3PY        -1.10180   0.24485   0.52030  -0.14009   0.02421
  80        3PZ         0.00005  -0.00002  -0.00003  -0.00001   0.00000
     Beta Molecular Orbital Coefficients:
                           1         2         3         4         5
                           O         O         O         O         O
     Eigenvalues --   -18.96578 -14.03594 -10.06980 -10.02914  -0.98595
   1 1   C  1S          0.00000  -0.00003   0.00144   0.99440  -0.01289
   2        2S          0.00008  -0.00009  -0.00019   0.04004   0.02468
   3        2PX        -0.00004  -0.00003  -0.00040  -0.00039   0.01893
   4        2PY         0.00002  -0.00001  -0.00010  -0.00022  -0.00242
   5        2PZ         0.00000   0.00000   0.00000   0.00000   0.00000
   6        3S         -0.00042   0.00072   0.00536  -0.02021  -0.00387
   7        3PX        -0.00016   0.00050   0.00267  -0.00140  -0.00103
   8        3PY        -0.00010  -0.00051   0.00118  -0.00002  -0.01171
   9        3PZ         0.00000   0.00000   0.00000   0.00000   0.00000
  10        4XX        -0.00009   0.00002  -0.00079  -0.00443   0.00548
  11        4YY        -0.00002  -0.00008  -0.00026  -0.00408  -0.00033
  12        4ZZ        -0.00001  -0.00008  -0.00026  -0.00410  -0.00004
  13        4XY         0.00004  -0.00011  -0.00006  -0.00018  -0.00079
  14        4XZ         0.00000   0.00000   0.00000   0.00000   0.00000
  15        4YZ         0.00000   0.00000   0.00000   0.00000   0.00000
  16 2   C  1S          0.00000   0.00001   0.99420  -0.00170  -0.07060
  17        2S          0.00024   0.00024   0.03872  -0.00025   0.12903
  18        2PX         0.00022  -0.00017   0.00046   0.00025   0.05744
  19        2PY        -0.00020  -0.00036  -0.00145   0.00007  -0.08530
  20        2PZ         0.00000   0.00000   0.00000   0.00000   0.00000
  21        3S         -0.00043   0.00193  -0.01101   0.00429   0.03439
  22        3PX        -0.00069   0.00081   0.00436  -0.00364  -0.03057
  23        3PY        -0.00029   0.00250  -0.00024  -0.00030   0.01076
  24        3PZ         0.00000   0.00000   0.00000   0.00000   0.00000
  25        4XX         0.00002  -0.00010  -0.00475  -0.00077   0.00096
  26        4YY        -0.00003  -0.00084  -0.00403  -0.00028   0.01468
  27        4ZZ        -0.00004  -0.00007  -0.00526  -0.00019  -0.00845
  28        4XY        -0.00001  -0.00026  -0.00028  -0.00008  -0.01470
  29        4XZ         0.00000   0.00000   0.00000   0.00000   0.00000
  30        4YZ         0.00000   0.00000   0.00000   0.00000   0.00000
  31 3   O  1S          0.99367  -0.00005   0.00004  -0.00007  -0.20622
  32        2S          0.02493  -0.00021   0.00046  -0.00036   0.46111
  33        2PX        -0.00099   0.00005   0.00023   0.00007  -0.10298
  34        2PY        -0.00036  -0.00003  -0.00015  -0.00007  -0.00241
  35        2PZ         0.00000   0.00000   0.00000   0.00000   0.00001
  36        3S          0.00582   0.00103  -0.00186   0.00130   0.43824
  37        3PX         0.00027  -0.00054   0.00099  -0.00018  -0.04369
  38        3PY        -0.00008  -0.00002  -0.00192   0.00078   0.01505
  39        3PZ         0.00000   0.00000   0.00000   0.00000   0.00000
  40        4XX        -0.00563   0.00002  -0.00026  -0.00013   0.00591
  41        4YY        -0.00546  -0.00020  -0.00057  -0.00011   0.00433
  42        4ZZ        -0.00563  -0.00021   0.00057  -0.00034  -0.00413
  43        4XY         0.00026  -0.00005   0.00082  -0.00010  -0.00584
  44        4XZ         0.00000   0.00000   0.00000   0.00000   0.00000
  45        4YZ         0.00000   0.00000   0.00000   0.00000   0.00000
  46 4   N  1S         -0.00001   0.99402  -0.00017  -0.00005  -0.01293
  47        2S         -0.00002   0.03059  -0.00040  -0.00022   0.02634
  48        2PX         0.00000  -0.00038   0.00018   0.00005  -0.00098
  49        2PY         0.00000  -0.00141   0.00052   0.00003  -0.01930
  50        2PZ         0.00000   0.00000   0.00000   0.00000   0.00000
  51        3S          0.00057  -0.00359   0.00151   0.00078   0.02020
  52        3PX        -0.00002   0.00057  -0.00083   0.00029   0.00795
  53        3PY        -0.00021   0.00185   0.00020  -0.00050  -0.00912
  54        3PZ         0.00000   0.00000   0.00000   0.00000   0.00000
  55        4XX        -0.00003  -0.00492  -0.00009  -0.00010  -0.00188
  56        4YY        -0.00006  -0.00464  -0.00058   0.00005   0.00403
  57        4ZZ        -0.00002  -0.00503  -0.00003  -0.00023  -0.00007
  58        4XY         0.00003   0.00013   0.00001  -0.00003  -0.00159
  59        4XZ         0.00000   0.00000   0.00000   0.00000   0.00000
  60        4YZ         0.00000   0.00000   0.00000   0.00000   0.00000
  61 5   H  1S          0.00004  -0.00001  -0.00018  -0.00058   0.00403
  62        2S          0.00004   0.00026  -0.00011   0.00295   0.00369
  63        3PX         0.00001  -0.00003   0.00001  -0.00024   0.00016
  64        3PY        -0.00002   0.00000  -0.00008   0.00043  -0.00008
  65        3PZ         0.00000   0.00000   0.00000   0.00000   0.00000
  66 6   H  1S          0.00000  -0.00002  -0.00021  -0.00048   0.00553
  67        2S          0.00001  -0.00013   0.00048   0.00316   0.00056
  68        3PX         0.00000   0.00000   0.00005  -0.00004   0.00085
  69        3PY         0.00000   0.00003   0.00003  -0.00027   0.00040
  70        3PZ         0.00000   0.00000   0.00008  -0.00040   0.00039
  71 7   H  1S          0.00000  -0.00002  -0.00021  -0.00048   0.00553
  72        2S          0.00001  -0.00013   0.00048   0.00316   0.00056
  73        3PX         0.00000   0.00000   0.00005  -0.00004   0.00084
  74        3PY         0.00000   0.00003   0.00003  -0.00027   0.00040
  75        3PZ         0.00000   0.00000  -0.00008   0.00040  -0.00039
  76 8   H  1S         -0.00011  -0.00009   0.00008   0.00002   0.14299
  77        2S         -0.00067   0.00000   0.00001   0.00042   0.00542
  78        3PX        -0.00026   0.00003  -0.00020  -0.00002   0.01093
  79        3PY        -0.00044   0.00000   0.00022   0.00008   0.02132
  80        3PZ         0.00000   0.00000   0.00000   0.00000   0.00000
                           6         7         8         9        10
                           O         O         O         O         O
     Eigenvalues --    -0.70897  -0.62972  -0.48955  -0.40902  -0.36055
   1 1   C  1S         -0.09936  -0.16359   0.01609   0.02866   0.00000
   2        2S          0.18939   0.31042  -0.02785  -0.05495   0.00000
   3        2PX         0.04362  -0.02075   0.07164   0.29959   0.00000
   4        2PY         0.01880  -0.02943  -0.02679  -0.00357   0.00005
   5        2PZ         0.00000   0.00001   0.00000   0.00001   0.37474
   6        3S          0.14866   0.31252  -0.05524  -0.06571   0.00000
   7        3PX        -0.00146  -0.00223   0.01408   0.13852   0.00000
   8        3PY         0.00617  -0.01703  -0.01581  -0.01503   0.00001
   9        3PZ         0.00000   0.00001   0.00000   0.00001   0.17509
  10        4XX         0.00737  -0.00003   0.00698   0.01331   0.00000
  11        4YY        -0.00009  -0.00018  -0.00392  -0.00604  -0.00001
  12        4ZZ        -0.00075   0.00111   0.00003  -0.00420   0.00001
  13        4XY         0.00342  -0.00300  -0.00115   0.00454   0.00000
  14        4XZ         0.00000   0.00000   0.00000   0.00000  -0.00022
  15        4YZ         0.00000   0.00000   0.00000   0.00000  -0.01384
  16 2   C  1S         -0.13289   0.02628  -0.07148  -0.07357   0.00000
  17        2S          0.26241  -0.05101   0.15279   0.16052   0.00001
  18        2PX        -0.02430  -0.15112   0.09642  -0.22301  -0.00002
  19        2PY         0.11650  -0.13410  -0.23537  -0.08037   0.00001
  20        2PZ         0.00000   0.00000   0.00000   0.00001   0.19748
  21        3S          0.15543  -0.03719   0.13591   0.12704   0.00002
  22        3PX        -0.01619  -0.01048  -0.00959  -0.07605   0.00000
  23        3PY        -0.01432  -0.02101  -0.04578  -0.03805   0.00001
  24        3PZ         0.00000   0.00000   0.00000   0.00000   0.09780
  25        4XX         0.00361   0.01231   0.00851  -0.00745   0.00000
  26        4YY         0.00516  -0.00768  -0.00697   0.00611   0.00000
  27        4ZZ        -0.00736   0.00238  -0.00647  -0.00036   0.00000
  28        4XY         0.01136   0.00177  -0.01905   0.01137   0.00000
  29        4XZ         0.00000   0.00000   0.00000   0.00000  -0.00502
  30        4YZ         0.00000   0.00000   0.00000   0.00000  -0.00776
  31 3   O  1S          0.05022   0.00850   0.01070   0.05897   0.00000
  32        2S         -0.11265  -0.01955  -0.01883  -0.13504   0.00001
  33        2PX        -0.00664  -0.03447  -0.06309  -0.27731   0.00004
  34        2PY         0.10268  -0.06004   0.45343  -0.16790  -0.00001
  35        2PZ         0.00000   0.00000   0.00000   0.00001   0.19671
  36        3S         -0.14319  -0.02866  -0.03280  -0.22600   0.00002
  37        3PX        -0.00078  -0.01853  -0.03522  -0.18487   0.00003
  38        3PY         0.04423  -0.03167   0.24246  -0.09098   0.00000
  39        3PZ         0.00000   0.00000   0.00000   0.00001   0.13828
  40        4XX         0.00297   0.00470   0.00725   0.02168   0.00000
  41        4YY         0.00377  -0.00415  -0.00199  -0.00299   0.00000
  42        4ZZ         0.00107  -0.00031   0.00235  -0.00294   0.00000
  43        4XY        -0.00639   0.00273  -0.02211   0.00461   0.00000
  44        4XZ         0.00000   0.00000   0.00000   0.00000  -0.01189
  45        4YZ         0.00000   0.00000   0.00000   0.00000   0.00298
  46 4   N  1S         -0.13193   0.10767   0.08688   0.02479   0.00001
  47        2S          0.26698  -0.22045  -0.17864  -0.05228  -0.00001
  48        2PX        -0.04375   0.00825   0.03391  -0.05122  -0.00001
  49        2PY        -0.11343   0.07991   0.00127   0.00217   0.00000
  50        2PZ         0.00000   0.00000   0.00000   0.00000   0.06521
  51        3S          0.27552  -0.23422  -0.22994  -0.05990  -0.00003
  52        3PX        -0.01420  -0.00183   0.01966  -0.03237   0.00000
  53        3PY        -0.03899   0.02466  -0.00979  -0.00963   0.00000
  54        3PZ         0.00000   0.00000   0.00000   0.00000   0.03510
  55        4XX        -0.00469   0.00608   0.00154   0.00293   0.00000
  56        4YY         0.00615  -0.00473   0.00778  -0.00108   0.00000
  57        4ZZ        -0.00484   0.00358   0.00247   0.00076   0.00000
  58        4XY         0.00625  -0.00040  -0.00345   0.00639   0.00000
  59        4XZ         0.00000   0.00000   0.00000   0.00000  -0.00262
  60        4YZ         0.00000   0.00000   0.00000   0.00000  -0.00743
  61 5   H  1S          0.05834   0.10746  -0.04508  -0.13352  -0.00007
  62        2S          0.01205   0.03546  -0.02827  -0.08205  -0.00005
  63        3PX         0.00426   0.00413  -0.00132   0.00156   0.00000
  64        3PY        -0.00334  -0.00784   0.00196   0.00745   0.00001
  65        3PZ         0.00000   0.00000   0.00000   0.00000   0.00983
  66 6   H  1S          0.05507   0.12116  -0.01526  -0.06506  -0.19868
  67        2S          0.01183   0.03725  -0.00997  -0.04430  -0.17247
  68        3PX         0.00162   0.00219   0.00151   0.00635  -0.00420
  69        3PY         0.00292   0.00533  -0.00076  -0.00268  -0.00724
  70        3PZ         0.00386   0.00821  -0.00099  -0.00377  -0.00085
  71 7   H  1S          0.05508   0.12116  -0.01527  -0.06509   0.19875
  72        2S          0.01183   0.03724  -0.00996  -0.04432   0.17251
  73        3PX         0.00162   0.00219   0.00151   0.00635   0.00420
  74        3PY         0.00292   0.00532  -0.00076  -0.00267   0.00724
  75        3PZ        -0.00387  -0.00821   0.00099   0.00378  -0.00086
  76 8   H  1S         -0.07207   0.03219  -0.21272   0.12647   0.00000
  77        2S         -0.01711   0.00670  -0.09227   0.05757   0.00000
  78        3PX        -0.00620  -0.00005  -0.01531  -0.00155   0.00000
  79        3PY        -0.00719   0.00231  -0.00767   0.00688   0.00000
  80        3PZ         0.00000   0.00000   0.00000   0.00000   0.00689
                          11        12        13        14        15
                           O         O         O         O         O
     Eigenvalues --    -0.34502  -0.29162  -0.28938  -0.20725  -0.14959
   1 1   C  1S         -0.00610  -0.01697  -0.00004  -0.01861   0.00000
   2        2S          0.01948   0.03830   0.00009   0.03575   0.00000
   3        2PX         0.03810   0.24933   0.00056   0.13115   0.00000
   4        2PY         0.40893  -0.10901  -0.00025   0.04956   0.00001
   5        2PZ        -0.00005   0.00046  -0.20852   0.00000  -0.04819
   6        3S          0.01550   0.08488   0.00020   0.11699  -0.00002
   7        3PX         0.00329   0.12529   0.00028   0.13531  -0.00001
   8        3PY         0.21552  -0.01903  -0.00006   0.01029   0.00006
   9        3PZ        -0.00003   0.00025  -0.12103   0.00001   0.02032
  10        4XX         0.01100   0.00207   0.00000   0.00452   0.00000
  11        4YY         0.00118  -0.00300   0.00000  -0.00358   0.00000
  12        4ZZ        -0.01169   0.00334   0.00000  -0.00268   0.00000
  13        4XY        -0.00769   0.01302   0.00003  -0.00556   0.00000
  14        4XZ         0.00000  -0.00002   0.01043   0.00000   0.01221
  15        4YZ        -0.00001  -0.00002   0.01022   0.00000   0.00925
  16 2   C  1S         -0.02933  -0.01953  -0.00005   0.05962   0.00000
  17        2S          0.06738   0.04261   0.00011  -0.13977   0.00000
  18        2PX        -0.12942  -0.20546  -0.00046  -0.17581  -0.00001
  19        2PY         0.03245   0.10988   0.00025  -0.26022  -0.00001
  20        2PZ        -0.00003  -0.00043   0.19112   0.00000   0.31422
  21        3S          0.07120   0.08412   0.00020  -0.12366   0.00001
  22        3PX        -0.03237  -0.01755  -0.00004   0.00402   0.00000
  23        3PY        -0.02312   0.01600   0.00004  -0.00744  -0.00002
  24        3PZ        -0.00001  -0.00030   0.13242  -0.00001   0.22564
  25        4XX         0.00941   0.01415   0.00003   0.01021   0.00000
  26        4YY        -0.01125  -0.01934  -0.00004   0.01004   0.00000
  27        4ZZ         0.00049   0.00383   0.00001  -0.00251   0.00000
  28        4XY        -0.01221   0.01093   0.00002  -0.00374   0.00000
  29        4XZ         0.00000  -0.00004   0.01770   0.00000   0.00074
  30        4YZ         0.00000   0.00002  -0.01043   0.00000   0.03026
  31 3   O  1S         -0.01725  -0.04268  -0.00009  -0.02263   0.00000
  32        2S          0.04188   0.08430   0.00018   0.04942   0.00001
  33        2PX         0.09043   0.47167   0.00108   0.06062  -0.00001
  34        2PY         0.00011  -0.03549  -0.00008   0.09445   0.00001
  35        2PZ        -0.00003  -0.00115   0.50202   0.00002  -0.30927
  36        3S          0.05811   0.18305   0.00041   0.12594   0.00001
  37        3PX         0.06895   0.34709   0.00080   0.03679  -0.00001
  38        3PY        -0.00669  -0.03887  -0.00008   0.05011   0.00000
  39        3PZ        -0.00002  -0.00085   0.37351   0.00002  -0.27846
  40        4XX        -0.00503  -0.02502  -0.00006   0.00200   0.00000
  41        4YY        -0.00025  -0.00236  -0.00001  -0.01347   0.00000
  42        4ZZ         0.00156   0.00043   0.00000  -0.00026   0.00000
  43        4XY        -0.00202  -0.00294  -0.00001  -0.00429   0.00000
  44        4XZ         0.00000   0.00005  -0.02150   0.00000   0.00739
  45        4YZ         0.00000  -0.00001   0.00298   0.00000   0.01042
  46 4   N  1S          0.05138   0.03509   0.00008  -0.08971   0.00000
  47        2S         -0.10908  -0.06983  -0.00016   0.17057   0.00000
  48        2PX        -0.07012  -0.06843  -0.00016   0.08528   0.00000
  49        2PY        -0.02392  -0.04798  -0.00011   0.43163   0.00003
  50        2PZ        -0.00001  -0.00019   0.08418  -0.00002   0.40387
  51        3S         -0.15756  -0.15005  -0.00035   0.38464   0.00002
  52        3PX        -0.04921  -0.04208  -0.00010   0.06089  -0.00001
  53        3PY        -0.02155  -0.02347  -0.00006   0.33491   0.00002
  54        3PZ        -0.00001  -0.00010   0.04724  -0.00002   0.33588
  55        4XX         0.00677   0.00698   0.00002  -0.00392   0.00000
  56        4YY         0.00263   0.00238   0.00001  -0.03611   0.00000
  57        4ZZ        -0.00003   0.00082   0.00000  -0.00182   0.00000
  58        4XY         0.00671   0.00799   0.00002  -0.00660   0.00000
  59        4XZ         0.00000   0.00000  -0.00085   0.00000  -0.00858
  60        4YZ         0.00000   0.00002  -0.00838   0.00000  -0.02406
  61 5   H  1S          0.21409  -0.16598  -0.00031   0.00374   0.00003
  62        2S          0.16469  -0.18141  -0.00034   0.04514   0.00002
  63        3PX         0.00841   0.00150   0.00001   0.00343   0.00000
  64        3PY        -0.00026   0.00525   0.00001   0.00181   0.00000
  65        3PZ         0.00000   0.00001  -0.00571   0.00000  -0.00160
  66 6   H  1S         -0.15330   0.02601   0.12909  -0.03324   0.06237
  67        2S         -0.12899   0.02167   0.10973  -0.05057   0.13023
  68        3PX        -0.00144   0.00554  -0.00016   0.00282  -0.00044
  69        3PY         0.00480  -0.00235   0.00385   0.00138   0.00097
  70        3PZ        -0.00792   0.00111   0.00024  -0.00142   0.00044
  71 7   H  1S         -0.15316   0.02649  -0.12903  -0.03322  -0.06240
  72        2S         -0.12886   0.02207  -0.10972  -0.05054  -0.13023
  73        3PX        -0.00144   0.00554   0.00018   0.00282   0.00044
  74        3PY         0.00481  -0.00233  -0.00385   0.00138  -0.00097
  75        3PZ         0.00791  -0.00110   0.00024   0.00142   0.00044
  76 8   H  1S         -0.02924  -0.10213  -0.00023  -0.07512  -0.00001
  77        2S         -0.02603  -0.04759  -0.00010  -0.07198  -0.00001
  78        3PX         0.00388   0.00747   0.00002  -0.00250   0.00000
  79        3PY        -0.00140  -0.00859  -0.00002   0.00092   0.00000
  80        3PZ         0.00000  -0.00004   0.01555   0.00000  -0.01077
                          16        17        18        19        20
                           O         V         V         V         V
     Eigenvalues --    -0.07351   0.07514   0.11586   0.16487   0.18251
   1 1   C  1S         -0.03354  -0.00002  -0.10129  -0.06915   0.08659
   2        2S          0.06826   0.00003   0.15472   0.07815  -0.12642
   3        2PX         0.11993  -0.00001  -0.13217  -0.03573   0.15929
   4        2PY         0.07907   0.00001  -0.04260  -0.31853  -0.27102
   5        2PZ        -0.00001  -0.06945  -0.00001   0.00011  -0.00093
   6        3S          0.27900   0.00023   1.41661   1.26026  -1.43795
   7        3PX         0.09980  -0.00009  -0.48250   0.09002   0.22990
   8        3PY         0.06753   0.00007  -0.08463  -1.02418  -0.71360
   9        3PZ        -0.00005  -0.24683  -0.00001   0.00039  -0.00286
  10        4XX         0.00376   0.00000   0.00002   0.00622   0.01198
  11        4YY        -0.00422  -0.00001  -0.01076   0.00744   0.00156
  12        4ZZ        -0.00035   0.00001  -0.00373  -0.02217  -0.00321
  13        4XY        -0.00964   0.00000   0.01183  -0.01607  -0.00398
  14        4XZ         0.00000  -0.02994   0.00001   0.00000   0.00003
  15        4YZ         0.00000  -0.01413   0.00001  -0.00002  -0.00004
  16 2   C  1S         -0.01037   0.00001   0.01346  -0.00085  -0.02575
  17        2S          0.02115  -0.00002   0.01201   0.05356   0.03304
  18        2PX         0.02317  -0.00001  -0.06701   0.07643  -0.08522
  19        2PY        -0.06776   0.00002   0.05489  -0.06607  -0.05851
  20        2PZ         0.00001  -0.46998   0.00011  -0.00008   0.00042
  21        3S          0.06498  -0.00008  -0.22987  -0.22929   0.33772
  22        3PX         0.14706  -0.00002  -0.20311   0.13894  -0.26795
  23        3PY        -0.10465  -0.00003  -0.10113   0.11177  -0.16515
  24        3PZ         0.00002  -0.49458   0.00013  -0.00016   0.00097
  25        4XX         0.02354   0.00000   0.00559  -0.00045  -0.01437
  26        4YY        -0.02176   0.00000   0.00636   0.01008   0.01100
  27        4ZZ         0.00139   0.00000  -0.00548  -0.00222  -0.00071
  28        4XY         0.03575   0.00000  -0.00279   0.01825   0.02256
  29        4XZ         0.00000   0.01912   0.00000   0.00000   0.00003
  30        4YZ         0.00000   0.02250   0.00000   0.00000  -0.00002
  31 3   O  1S          0.03036  -0.00001  -0.06226   0.03729  -0.03677
  32        2S         -0.06623   0.00003   0.12195  -0.09681   0.04671
  33        2PX         0.08078  -0.00004  -0.15160   0.11910  -0.00023
  34        2PY        -0.11061  -0.00002  -0.14763   0.08091  -0.22188
  35        2PZ        -0.00001   0.17830  -0.00003  -0.00001  -0.00027
  36        3S         -0.25403   0.00011   0.68716  -0.31975   0.50877
  37        3PX         0.11197  -0.00005  -0.22823   0.13820  -0.05564
  38        3PY        -0.10803  -0.00004  -0.20536   0.15185  -0.32005
  39        3PZ        -0.00002   0.20668  -0.00004   0.00002  -0.00026
  40        4XX         0.00054   0.00000  -0.00861   0.00383  -0.00648
  41        4YY         0.00970   0.00000  -0.01897   0.01029  -0.02881
  42        4ZZ         0.00163   0.00000  -0.01755  -0.00418  -0.01635
  43        4XY         0.00471   0.00000  -0.00170  -0.00189  -0.00772
  44        4XZ         0.00000   0.00880   0.00000   0.00000  -0.00002
  45        4YZ         0.00000  -0.01655   0.00000   0.00000   0.00002
  46 4   N  1S          0.00146   0.00000  -0.01725  -0.00686  -0.00763
  47        2S         -0.00938   0.00001   0.03868   0.02038   0.01021
  48        2PX         0.52494   0.00000   0.02041  -0.10316   0.05588
  49        2PY        -0.12219   0.00000  -0.05251  -0.00991  -0.07520
  50        2PZ         0.00001   0.41083  -0.00009   0.00008  -0.00015
  51        3S          0.01844   0.00004   0.22516   0.00205   0.12358
  52        3PX         0.47788   0.00000   0.02781  -0.14447   0.05187
  53        3PY        -0.11774  -0.00002  -0.16347  -0.00668  -0.11111
  54        3PZ         0.00001   0.53045  -0.00012   0.00010  -0.00041
  55        4XX        -0.01130   0.00000  -0.00166  -0.00045  -0.00307
  56        4YY         0.00668   0.00000   0.00756   0.00194  -0.00296
  57        4ZZ        -0.00122   0.00000  -0.00125  -0.00066  -0.00125
  58        4XY        -0.01954   0.00000   0.00609  -0.00347  -0.00147
  59        4XZ         0.00000   0.00374   0.00000   0.00000   0.00001
  60        4YZ         0.00000   0.00459   0.00000   0.00000  -0.00001
  61 5   H  1S          0.03640  -0.00008  -0.08701   0.11085   0.10102
  62        2S         -0.03577  -0.00043  -0.84978   0.70765   1.60406
  63        3PX        -0.00041   0.00000   0.00105  -0.00689  -0.01132
  64        3PY        -0.00063   0.00000  -0.00825  -0.00184   0.00800
  65        3PZ         0.00000  -0.00063   0.00000   0.00000  -0.00005
  66 6   H  1S         -0.03728  -0.10107  -0.01235  -0.09456  -0.00173
  67        2S         -0.09853  -0.41463  -0.69919  -1.21184   0.08528
  68        3PX         0.00461   0.00612  -0.00710   0.00392   0.00049
  69        3PY         0.00170   0.00262   0.00657  -0.00633  -0.00534
  70        3PZ        -0.00205  -0.00031   0.00485   0.01276   0.00011
  71 7   H  1S         -0.03724   0.10113  -0.01240  -0.09451  -0.00129
  72        2S         -0.09842   0.41473  -0.69933  -1.21156   0.09204
  73        3PX         0.00461  -0.00612  -0.00709   0.00392   0.00050
  74        3PY         0.00170  -0.00261   0.00656  -0.00634  -0.00540
  75        3PZ         0.00205  -0.00031  -0.00486  -0.01275  -0.00010
  76 8   H  1S          0.04420  -0.00002  -0.10173   0.07385  -0.13272
  77        2S          0.09384  -0.00016  -0.92834   0.57613  -0.96985
  78        3PX         0.00235   0.00000   0.01101  -0.00705   0.00539
  79        3PY        -0.00301   0.00000   0.01269  -0.01044   0.01360
  80        3PZ         0.00000   0.00736   0.00000   0.00000   0.00000
                          21        22        23        24        25
                           V         V         V         V         V
     Eigenvalues --     0.19136   0.23372   0.34369   0.41487   0.58129
   1 1   C  1S          0.00019   0.06372  -0.04653  -0.00282   0.00000
   2        2S         -0.00028  -0.04913  -0.00940  -0.02854   0.00004
   3        2PX         0.00046  -0.27837  -0.05472   0.00729   0.00016
   4        2PY        -0.00049  -0.01681  -0.05317  -0.12798  -0.00002
   5        2PZ         0.43910   0.00015   0.00011   0.00004  -0.55580
   6        3S         -0.00321  -0.99838   1.28200   0.37791   0.00001
   7        3PX         0.00076  -1.49790   1.17940   0.41930  -0.00013
   8        3PY        -0.00126  -0.00501   0.67403  -0.98276   0.00000
   9        3PZ         1.32032   0.00033   0.00016   0.00003   1.12478
  10        4XX         0.00002   0.04743  -0.03776  -0.01837   0.00001
  11        4YY         0.00002  -0.02478  -0.00921   0.00746   0.00009
  12        4ZZ        -0.00002  -0.01040   0.02200   0.00349  -0.00007
  13        4XY        -0.00001   0.00560  -0.02554   0.05842  -0.00002
  14        4XZ        -0.01279   0.00000   0.00000   0.00000  -0.00103
  15        4YZ         0.01558   0.00001   0.00001   0.00001   0.07951
  16 2   C  1S         -0.00001  -0.15796  -0.03301  -0.04692  -0.00001
  17        2S          0.00004   0.20821  -0.01268  -0.01137   0.00028
  18        2PX        -0.00025  -0.11451   0.53924  -0.03935   0.00020
  19        2PY        -0.00004  -0.23285  -0.16242   0.32366  -0.00018
  20        2PZ        -0.19770  -0.00008  -0.00002  -0.00001  -0.61046
  21        3S         -0.00011   2.64619   0.27073   1.87648  -0.00050
  22        3PX        -0.00065  -0.53675   1.95425   0.52953  -0.00026
  23        3PY        -0.00033  -0.49396  -0.25668   3.09645   0.00043
  24        3PZ        -0.45488  -0.00020  -0.00005  -0.00004   0.37711
  25        4XX        -0.00001  -0.01903  -0.02825   0.00909   0.00004
  26        4YY         0.00003  -0.00393  -0.01707  -0.01505  -0.00001
  27        4ZZ        -0.00001   0.01939   0.02248   0.00663   0.00001
  28        4XY         0.00005   0.00642   0.00717  -0.01418   0.00003
  29        4XZ        -0.01243  -0.00001   0.00000   0.00000  -0.02685
  30        4YZ         0.00670   0.00000   0.00000   0.00000  -0.00105
  31 3   O  1S         -0.00012   0.05844   0.05738  -0.02652   0.00000
  32        2S          0.00017  -0.11827  -0.10880   0.00606  -0.00001
  33        2PX        -0.00006   0.15134   0.03275  -0.10835   0.00007
  34        2PY        -0.00044  -0.17376  -0.31171   0.04121  -0.00011
  35        2PZ         0.11876   0.00004   0.00002  -0.00001  -0.06002
  36        3S          0.00156  -0.72600  -0.77886   0.77595   0.00032
  37        3PX        -0.00028   0.39965   0.13962  -0.48266  -0.00013
  38        3PY        -0.00060  -0.34783  -0.83254   0.10750   0.00012
  39        3PZ         0.12575   0.00003  -0.00001   0.00003  -0.01584
  40        4XX        -0.00001  -0.00279  -0.00111  -0.02305   0.00000
  41        4YY        -0.00007   0.00769   0.02735   0.00924   0.00004
  42        4ZZ        -0.00005   0.01622   0.01365  -0.02096  -0.00003
  43        4XY        -0.00001  -0.01562   0.00248   0.02000  -0.00005
  44        4XZ         0.00645   0.00000   0.00000   0.00000   0.00682
  45        4YZ        -0.00900   0.00000   0.00000   0.00000  -0.03148
  46 4   N  1S         -0.00003   0.02961   0.03683   0.12201   0.00000
  47        2S          0.00003  -0.05824  -0.10133  -0.24087  -0.00004
  48        2PX         0.00020  -0.00626  -0.10901   0.10774   0.00007
  49        2PY        -0.00025   0.16578   0.10344   0.10539   0.00001
  50        2PZ         0.08195   0.00002   0.00000   0.00002  -0.15996
  51        3S          0.00051  -0.32666  -0.47661  -2.88132   0.00000
  52        3PX         0.00017   0.12716  -0.45157   0.66587  -0.00001
  53        3PY        -0.00045   0.34797   0.51679   1.59958  -0.00002
  54        3PZ         0.19997   0.00007   0.00001  -0.00006   0.07098
  55        4XX         0.00000  -0.00744  -0.01251   0.00494  -0.00002
  56        4YY        -0.00001  -0.00640  -0.00913  -0.04519   0.00001
  57        4ZZ        -0.00001   0.01200   0.00233   0.00238  -0.00002
  58        4XY         0.00000  -0.00163  -0.01693  -0.01114  -0.00002
  59        4XZ        -0.00404   0.00000   0.00000   0.00000  -0.00433
  60        4YZ         0.00562   0.00000   0.00000   0.00000   0.03684
  61 5   H  1S          0.00023  -0.03684   0.02514  -0.13813   0.00012
  62        2S          0.00408  -0.51590  -0.16178   0.80265   0.00009
  63        3PX        -0.00003  -0.02008   0.00673   0.01931   0.00000
  64        3PY         0.00003  -0.01308   0.00371   0.00555   0.00001
  65        3PZ         0.02022   0.00001   0.00001  -0.00001   0.03354
  66 6   H  1S          0.08735  -0.05392   0.07822   0.03266   0.37127
  67        2S          1.40865  -0.04202   0.14935  -0.37519   0.16545
  68        3PX         0.00116  -0.01151   0.01190  -0.01694  -0.00278
  69        3PY        -0.01144   0.00204   0.00975  -0.00405  -0.00181
  70        3PZ        -0.00143   0.00200  -0.00239   0.00702   0.02899
  71 7   H  1S         -0.08733  -0.05396   0.07821   0.03261  -0.37137
  72        2S         -1.40834  -0.04306   0.14871  -0.37473  -0.16559
  73        3PX        -0.00116  -0.01150   0.01190  -0.01692   0.00277
  74        3PY         0.01141   0.00204   0.00975  -0.00404   0.00180
  75        3PZ        -0.00144  -0.00201   0.00238  -0.00702   0.02900
  76 8   H  1S         -0.00031  -0.02098  -0.03411   0.08937  -0.00003
  77        2S         -0.00243   0.10563  -0.63757   0.10730   0.00008
  78        3PX         0.00000   0.01216   0.00582   0.00323   0.00002
  79        3PY         0.00003  -0.00442  -0.00464  -0.01554  -0.00001
  80        3PZ         0.00028   0.00000   0.00000   0.00000   0.01161
                          26        27        28        29        30
                           V         V         V         V         V
     Eigenvalues --     0.58931   0.63377   0.65037   0.67183   0.69827
   1 1   C  1S          0.02080   0.01835  -0.00936   0.00000  -0.01009
   2        2S         -0.24977  -0.14173   0.08246  -0.00002  -0.07963
   3        2PX        -0.71506  -0.59413   0.21378   0.00009   0.01827
   4        2PY        -0.31528   0.38269   0.46474   0.00032   0.39585
   5        2PZ        -0.00008   0.00007   0.00030  -0.54289   0.00002
   6        3S          0.47036  -0.04885   0.17760   0.00048   1.03350
   7        3PX         1.02108   1.25632  -0.07013   0.00026   0.61263
   8        3PY         0.74040  -1.38388  -0.90964  -0.00061  -1.19946
   9        3PZ         0.00021  -0.00014  -0.00075   1.51012  -0.00005
  10        4XX         0.00685  -0.01700   0.02017   0.00003   0.04329
  11        4YY        -0.03123   0.05593   0.04261   0.00009   0.01724
  12        4ZZ        -0.02332  -0.05092  -0.04462  -0.00011  -0.05287
  13        4XY         0.00472  -0.01898  -0.03995  -0.00005   0.02974
  14        4XZ         0.00000   0.00002   0.00005  -0.02992   0.00001
  15        4YZ         0.00003  -0.00008  -0.00009   0.04933  -0.00004
  16 2   C  1S         -0.00615  -0.03806   0.00503   0.00000   0.03595
  17        2S         -0.48380   0.53647  -0.28876  -0.00010  -0.33015
  18        2PX        -0.58194   0.20183  -0.17213  -0.00022  -0.35899
  19        2PY         0.15439  -0.04904   0.57651   0.00041  -0.79818
  20        2PZ        -0.00026  -0.00004  -0.00071   0.77193  -0.00003
  21        3S          0.01912  -1.02284   1.28438   0.00054  -0.17950
  22        3PX         0.99562  -0.70250   0.82744   0.00100   0.96561
  23        3PY        -0.76086   1.65869  -0.32292  -0.00010   2.17494
  24        3PZ         0.00023   0.00011   0.00109  -1.43208   0.00008
  25        4XX        -0.15371  -0.06127   0.01975   0.00000  -0.03070
  26        4YY         0.02780  -0.00316   0.01266   0.00003   0.04827
  27        4ZZ         0.01154   0.06013  -0.02844  -0.00002  -0.04427
  28        4XY        -0.06390   0.03562  -0.00734   0.00001   0.05485
  29        4XZ        -0.00002   0.00000  -0.00001   0.00195   0.00001
  30        4YZ         0.00000  -0.00001  -0.00002   0.01398  -0.00001
  31 3   O  1S         -0.00162  -0.02740  -0.00455  -0.00001  -0.00876
  32        2S         -0.01625   0.06815   0.00186  -0.00003  -0.14167
  33        2PX        -0.11212   0.30640  -0.10579  -0.00006  -0.02835
  34        2PY         0.09680  -0.12569  -0.04995  -0.00012  -0.13113
  35        2PZ         0.00000  -0.00004  -0.00018   0.22560  -0.00006
  36        3S         -0.46687   1.00088  -0.36461  -0.00018   0.75252
  37        3PX         0.14153  -0.47265   0.06730  -0.00003  -0.29586
  38        3PY        -0.21422   0.37844  -0.17912  -0.00012   0.06985
  39        3PZ        -0.00004   0.00004  -0.00004   0.05589   0.00005
  40        4XX         0.01209   0.06603  -0.02257  -0.00002   0.00555
  41        4YY        -0.12789   0.03933  -0.07767  -0.00009  -0.05497
  42        4ZZ         0.04295  -0.02486   0.03388   0.00002  -0.07850
  43        4XY         0.04724  -0.08114   0.07726   0.00005  -0.02100
  44        4XZ         0.00001   0.00000   0.00002  -0.02922  -0.00001
  45        4YZ        -0.00002   0.00000  -0.00002   0.01141   0.00000
  46 4   N  1S         -0.00348   0.02314   0.02872   0.00003  -0.02428
  47        2S         -0.10952  -0.00180  -0.04535  -0.00015  -0.10941
  48        2PX         0.04582   0.11079  -0.29047  -0.00019  -0.18693
  49        2PY        -0.06892  -0.04382   0.01997  -0.00004  -0.17959
  50        2PZ        -0.00005   0.00008  -0.00011   0.15656   0.00005
  51        3S          0.38659  -0.74320  -0.47805  -0.00029  -0.86729
  52        3PX        -0.15351   0.35038   0.08053   0.00000   0.00192
  53        3PY        -0.12084   0.34166   0.60841   0.00055   0.07870
  54        3PZ         0.00002  -0.00010  -0.00016   0.17839  -0.00008
  55        4XX         0.01267  -0.00789  -0.02425  -0.00004  -0.02071
  56        4YY        -0.07594   0.02969   0.01619  -0.00003  -0.17252
  57        4ZZ        -0.01127   0.00170  -0.00656  -0.00003   0.00359
  58        4XY         0.03844   0.01229   0.01131   0.00000  -0.07857
  59        4XZ         0.00000   0.00001   0.00002  -0.03140   0.00001
  60        4YZ         0.00002   0.00000   0.00003  -0.03036   0.00001
  61 5   H  1S          0.06255   0.37463   0.36156   0.00041  -0.01045
  62        2S         -0.07799   0.66313   0.10034   0.00028   0.52136
  63        3PX        -0.01559   0.04296  -0.01290   0.00000   0.03899
  64        3PY        -0.01434  -0.01326  -0.02018   0.00000  -0.00938
  65        3PZ         0.00002  -0.00001  -0.00002   0.03640  -0.00001
  66 6   H  1S          0.06006  -0.02208  -0.18341   0.16812  -0.08423
  67        2S          0.19109  -0.16011  -0.12102   0.39555  -0.26290
  68        3PX         0.00533  -0.00592   0.01544   0.04159  -0.03595
  69        3PY         0.01245  -0.03527  -0.02826   0.00916  -0.02897
  70        3PZ         0.01344   0.00500  -0.00302   0.02840   0.00462
  71 7   H  1S          0.05981  -0.02188  -0.18311  -0.16844  -0.08413
  72        2S          0.19092  -0.15960  -0.12055  -0.39589  -0.26249
  73        3PX         0.00533  -0.00589   0.01551  -0.04160  -0.03591
  74        3PY         0.01244  -0.03526  -0.02825  -0.00922  -0.02897
  75        3PZ        -0.01343  -0.00500   0.00300   0.02840  -0.00462
  76 8   H  1S         -0.09084  -0.12595   0.01324  -0.00005   0.01845
  77        2S         -0.13958   0.03985  -0.41475  -0.00035  -0.00847
  78        3PX        -0.02377  -0.00552  -0.02905  -0.00002   0.01290
  79        3PY         0.03719   0.00176   0.04293   0.00005   0.00960
  80        3PZ         0.00000   0.00000   0.00000   0.00594   0.00000
                          31        32        33        34        35
                           V         V         V         V         V
     Eigenvalues --     0.76366   0.81571   0.83092   0.83319   0.86363
   1 1   C  1S         -0.01715  -0.05387   0.00258   0.00005   0.00844
   2        2S          0.22422   0.16933  -0.09542  -0.00094  -0.05957
   3        2PX         0.07892  -0.07746   0.00889   0.00012  -0.14216
   4        2PY        -0.10339   0.12182  -0.23665  -0.00224   0.60899
   5        2PZ         0.00003   0.00018  -0.00468   0.47698  -0.00044
   6        3S         -0.72479  -0.70037   0.30379   0.00281   0.55625
   7        3PX        -0.54249  -0.59508   0.01983   0.00014   0.50906
   8        3PY         0.20879  -0.49788   0.81670   0.00809  -0.72943
   9        3PZ        -0.00012  -0.00020   0.00832  -0.85265   0.00082
  10        4XX        -0.01386  -0.04617   0.05431   0.00052  -0.00923
  11        4YY        -0.00214  -0.01788  -0.07862  -0.00067  -0.08980
  12        4ZZ         0.00584  -0.03393   0.00835   0.00003   0.11710
  13        4XY        -0.05784   0.00749  -0.06914  -0.00069   0.11590
  14        4XZ         0.00000   0.00003  -0.00074   0.07616  -0.00010
  15        4YZ        -0.00002   0.00006  -0.00131   0.13677   0.00007
  16 2   C  1S          0.04447  -0.02184   0.01316   0.00014   0.01471
  17        2S         -0.26150  -0.94762   0.09984   0.00120   0.26820
  18        2PX         0.23582   0.28668  -0.12478  -0.00122  -0.17376
  19        2PY        -0.06282   0.11249  -0.07336  -0.00077   0.09297
  20        2PZ        -0.00001   0.00003   0.00049  -0.05410  -0.00011
  21        3S          1.55933   1.74519  -0.38725  -0.00392  -0.42877
  22        3PX        -0.47027  -0.72629   0.33229   0.00309   0.97145
  23        3PY         0.24881  -0.30921  -0.41297  -0.00416  -0.74776
  24        3PZ         0.00001  -0.00004  -0.00291   0.31012   0.00013
  25        4XX        -0.02915  -0.04787  -0.00130   0.00000   0.06250
  26        4YY         0.18285  -0.17176   0.03882   0.00046   0.05601
  27        4ZZ        -0.06446  -0.00650  -0.01497  -0.00016  -0.01540
  28        4XY         0.06269   0.04397   0.09524   0.00089  -0.00181
  29        4XZ         0.00000  -0.00003   0.00046  -0.04772   0.00004
  30        4YZ        -0.00001   0.00000  -0.00023   0.02399   0.00002
  31 3   O  1S         -0.01136  -0.00110   0.02226   0.00022   0.01382
  32        2S          0.09927   0.09292   0.07719   0.00069  -0.23587
  33        2PX        -0.17526   0.30141   0.53777   0.00510  -0.02036
  34        2PY         0.04878  -0.02527   0.13668   0.00143   0.14034
  35        2PZ         0.00002  -0.00004   0.00129  -0.13047  -0.00022
  36        3S         -0.25489  -0.23618  -0.22706  -0.00218  -0.01837
  37        3PX         0.22402  -0.23551  -0.48095  -0.00449   0.18590
  38        3PY        -0.19850   0.05258  -0.04855  -0.00060  -0.39994
  39        3PZ        -0.00002   0.00006  -0.00090   0.08895   0.00018
  40        4XX         0.01683   0.03272   0.08906   0.00084  -0.02297
  41        4YY        -0.09947   0.04057   0.19509   0.00189  -0.08775
  42        4ZZ         0.06675   0.06356  -0.02839  -0.00030  -0.06466
  43        4XY        -0.09742   0.04822   0.14592   0.00141   0.06255
  44        4XZ         0.00001  -0.00001   0.00011  -0.01179  -0.00001
  45        4YZ         0.00001  -0.00002   0.00027  -0.02873  -0.00001
  46 4   N  1S          0.01380  -0.00702  -0.00705  -0.00007  -0.00397
  47        2S         -0.14604  -0.05111  -0.19248  -0.00180   0.05366
  48        2PX        -0.06514   0.41182  -0.29964  -0.00321   0.31580
  49        2PY        -0.73693   0.02660  -0.39065  -0.00386  -0.31869
  50        2PZ        -0.00005   0.00026  -0.00706   0.72848   0.00027
  51        3S         -0.32837   0.05436   0.60101   0.00591   0.27926
  52        3PX         0.31203  -0.40629   0.18896   0.00219  -0.66219
  53        3PY         1.07981  -0.13722   0.30550   0.00301   0.37487
  54        3PZ         0.00003  -0.00023   0.00794  -0.82355  -0.00034
  55        4XX        -0.06004  -0.02964  -0.05384  -0.00051  -0.01461
  56        4YY        -0.12784   0.00579  -0.09380  -0.00092   0.03112
  57        4ZZ        -0.03410   0.02236  -0.05989  -0.00058  -0.02207
  58        4XY        -0.03393  -0.02863  -0.00692  -0.00005  -0.01986
  59        4XZ         0.00000   0.00000  -0.00004   0.00374   0.00000
  60        4YZ         0.00000   0.00000   0.00012  -0.01233  -0.00001
  61 5   H  1S         -0.05299  -0.39529   0.07435   0.00089  -0.56872
  62        2S         -0.26880   0.29583  -0.55838  -0.00583   1.20850
  63        3PX         0.00158   0.03593  -0.03969  -0.00041   0.03598
  64        3PY        -0.00098  -0.04283   0.00282   0.00006  -0.05575
  65        3PZ         0.00000   0.00005  -0.00031   0.03212   0.00003
  66 6   H  1S         -0.13162  -0.40858  -0.01859   0.49841   0.36813
  67        2S          0.16157   0.00179   0.33100  -0.98071  -0.61611
  68        3PX         0.01699   0.00942  -0.00281  -0.03119  -0.03055
  69        3PY         0.01499   0.01367   0.03416  -0.04653   0.01264
  70        3PZ         0.01327   0.03490  -0.01234  -0.02730  -0.06125
  71 7   H  1S         -0.13152  -0.40908  -0.00876  -0.49834   0.36842
  72        2S          0.16144   0.00267   0.31127   0.98715  -0.61700
  73        3PX         0.01699   0.00945  -0.00343   0.03115  -0.03057
  74        3PY         0.01497   0.01369   0.03324   0.04718   0.01266
  75        3PZ        -0.01328  -0.03493   0.01286  -0.02705   0.06125
  76 8   H  1S         -0.48888   0.07709   0.57938   0.00562   0.16113
  77        2S          0.54624  -0.28444  -0.67607  -0.00645  -0.51904
  78        3PX         0.04138  -0.05191  -0.08186  -0.00077  -0.05424
  79        3PY         0.06443  -0.00639  -0.14060  -0.00138  -0.02379
  80        3PZ         0.00000   0.00001  -0.00014   0.01453   0.00001
                          36        37        38        39        40
                           V         V         V         V         V
     Eigenvalues --     0.89507   0.90982   0.93637   0.98905   1.03645
   1 1   C  1S         -0.00001   0.02157   0.01995  -0.00001  -0.00845
   2        2S          0.00020  -0.20335  -1.07121  -0.00025   0.25058
   3        2PX         0.00007   0.24556   0.34435   0.00008  -0.17776
   4        2PY        -0.00051  -0.25330   0.17241  -0.00016   0.00468
   5        2PZ        -0.56568   0.00030  -0.00020  -0.06276  -0.00018
   6        3S         -0.00046   1.41706   1.63801   0.00093  -1.32902
   7        3PX        -0.00019   0.12900  -1.36002  -0.00007   0.17831
   8        3PY         0.00093   0.61256  -0.62941   0.00073  -0.55145
   9        3PZ         0.96272  -0.00066   0.00046   0.49785   0.00080
  10        4XX         0.00004   0.07676  -0.18645   0.00002  -0.03820
  11        4YY        -0.00008   0.09537   0.01747   0.00001   0.08944
  12        4ZZ         0.00005  -0.12126   0.05477  -0.00005  -0.07977
  13        4XY        -0.00003  -0.04041  -0.04638  -0.00003  -0.00609
  14        4XZ        -0.04388   0.00006  -0.00002  -0.07377   0.00004
  15        4YZ        -0.16146  -0.00010  -0.00003   0.01897  -0.00014
  16 2   C  1S         -0.00001   0.01269  -0.02989   0.00000   0.00349
  17        2S         -0.00003   0.25467  -0.80139   0.00015  -0.12628
  18        2PX         0.00002  -0.30974   0.28914  -0.00012   0.29296
  19        2PY         0.00001  -0.03022  -0.02581   0.00011  -0.11841
  20        2PZ        -0.23859   0.00001  -0.00002   0.24849   0.00015
  21        3S         -0.00013  -0.59415   2.16236  -0.00111   0.98157
  22        3PX        -0.00019   1.61613  -1.11997   0.00032  -0.87932
  23        3PY         0.00010   0.13094   0.04336  -0.00040   0.31107
  24        3PZ         0.50495   0.00010  -0.00006  -0.92870  -0.00069
  25        4XX        -0.00001   0.07747  -0.11639  -0.00002   0.01028
  26        4YY        -0.00004  -0.00285  -0.03833  -0.00004   0.08084
  27        4ZZ         0.00001   0.00057   0.01492   0.00002  -0.03321
  28        4XY         0.00002   0.05530  -0.04215   0.00005  -0.09658
  29        4XZ         0.05067  -0.00001   0.00000   0.01604  -0.00004
  30        4YZ         0.05534   0.00000   0.00001   0.00210  -0.00001
  31 3   O  1S         -0.00001   0.00291   0.00042   0.00000  -0.00869
  32        2S          0.00016   0.03026  -0.05886   0.00030  -0.69317
  33        2PX        -0.00004  -0.04637   0.08916   0.00014  -0.30963
  34        2PY        -0.00016   0.06345   0.16905  -0.00032   0.50820
  35        2PZ        -0.14121  -0.00003  -0.00006  -0.91053  -0.00044
  36        3S         -0.00017  -0.31031   0.10740  -0.00072   1.78044
  37        3PX        -0.00004  -0.11741   0.01726  -0.00023   0.49759
  38        3PY         0.00028  -0.23951  -0.26364   0.00056  -0.84604
  39        3PZ         0.06428   0.00001   0.00007   1.23170   0.00068
  40        4XX         0.00002  -0.00064  -0.00622   0.00008  -0.15654
  41        4YY         0.00003   0.01305  -0.02326   0.00003  -0.10328
  42        4ZZ         0.00005   0.01269   0.01216   0.00013  -0.31117
  43        4XY        -0.00004   0.02357   0.00687  -0.00005   0.08697
  44        4XZ         0.00177   0.00001  -0.00001   0.02457   0.00001
  45        4YZ        -0.01162   0.00000  -0.00002  -0.04730  -0.00006
  46 4   N  1S          0.00000   0.00501  -0.00154   0.00000   0.00113
  47        2S         -0.00006   0.00690  -0.04455  -0.00016   0.09779
  48        2PX         0.00000   0.70808  -0.00316  -0.00007  -0.00728
  49        2PY         0.00019  -0.18785  -0.00918   0.00005  -0.01096
  50        2PZ         0.65105   0.00004   0.00006  -0.14439  -0.00008
  51        3S          0.00005  -0.29379  -0.20721   0.00067  -0.39120
  52        3PX         0.00007  -1.14353   0.26839  -0.00008   0.31988
  53        3PY        -0.00024   0.44096   0.00034  -0.00022   0.06859
  54        3PZ        -0.90307  -0.00008  -0.00007   0.41780   0.00028
  55        4XX         0.00001  -0.02178  -0.01025  -0.00002   0.02044
  56        4YY         0.00000   0.01823  -0.04963  -0.00001  -0.01501
  57        4ZZ         0.00000   0.00632   0.04051  -0.00006   0.03034
  58        4XY         0.00000  -0.04543   0.02218   0.00000   0.03169
  59        4XZ        -0.02010   0.00000  -0.00001   0.02191   0.00000
  60        4YZ        -0.03344   0.00000   0.00000   0.01367   0.00002
  61 5   H  1S          0.00012   0.62896   0.34865  -0.00004   0.15797
  62        2S         -0.00041  -1.19580  -0.88473  -0.00046   0.35474
  63        3PX         0.00000  -0.03212  -0.00050  -0.00001   0.03050
  64        3PY        -0.00001   0.05554   0.05968   0.00003   0.00061
  65        3PZ        -0.04293  -0.00003  -0.00004   0.04161  -0.00001
  66 6   H  1S         -0.48386  -0.04401   0.41573   0.01932  -0.24875
  67        2S          1.15751   0.23850  -1.21663   0.21030   0.35411
  68        3PX        -0.00187  -0.01073   0.02092   0.03526   0.00669
  69        3PY         0.04581  -0.04259  -0.02947  -0.00665  -0.02722
  70        3PZ         0.03706   0.02058  -0.05980   0.00007   0.04133
  71 7   H  1S          0.48342  -0.04407   0.41596  -0.01933  -0.24858
  72        2S         -1.15663   0.23905  -1.21733  -0.21028   0.35314
  73        3PX         0.00188  -0.01072   0.02092  -0.03529   0.00675
  74        3PY        -0.04578  -0.04261  -0.02944   0.00665  -0.02730
  75        3PZ         0.03703  -0.02057   0.05985   0.00005  -0.04129
  76 8   H  1S         -0.00012   0.04745  -0.04954  -0.00022   0.43744
  77        2S          0.00028  -0.09618  -0.10608   0.00064  -1.35202
  78        3PX         0.00003   0.01407  -0.03373   0.00004  -0.08565
  79        3PY         0.00004  -0.02501  -0.02252   0.00006  -0.09847
  80        3PZ        -0.00471  -0.00001   0.00002   0.01437   0.00001
                          41        42        43        44        45
                           V         V         V         V         V
     Eigenvalues --     1.13402   1.31807   1.34285   1.39924   1.43823
   1 1   C  1S          0.06525   0.00008   0.04178   0.05249  -0.00012
   2        2S          1.12599   0.00082   0.44777   0.65382  -0.00164
   3        2PX        -0.00021  -0.00020  -0.08903  -0.03999  -0.00011
   4        2PY         0.09863  -0.00004  -0.02137   0.10632   0.00006
   5        2PZ        -0.00014  -0.09279   0.00011   0.00005   0.04242
   6        3S         -2.74047  -0.00433  -2.29444  -2.78222   0.00608
   7        3PX         0.19143  -0.00108  -0.55882  -0.75472   0.00164
   8        3PY        -0.32769  -0.00111  -0.62398  -0.21219  -0.00033
   9        3PZ         0.00051   0.25994  -0.00021  -0.00024  -0.22318
  10        4XX         0.04802  -0.00016  -0.07861   0.11956  -0.00001
  11        4YY         0.05208  -0.00041  -0.01355  -0.27194  -0.00011
  12        4ZZ         0.10823   0.00063   0.12381   0.22696  -0.00008
  13        4XY         0.00147   0.00004  -0.01346  -0.19593  -0.00003
  14        4XZ        -0.00003   0.53387  -0.00111  -0.00019  -0.03039
  15        4YZ         0.00001  -0.17844   0.00038   0.00033   0.06814
  16 2   C  1S         -0.01049  -0.00006  -0.03283  -0.02238   0.00005
  17        2S         -0.46157  -0.00123  -0.65635  -0.13436   0.00033
  18        2PX        -0.17219   0.00013   0.08399   0.16145  -0.00022
  19        2PY        -0.09314  -0.00043  -0.21722   0.01683  -0.00004
  20        2PZ         0.00006   0.12215  -0.00020  -0.00001  -0.00322
  21        3S          3.27167   0.00819   4.33231   0.07880  -0.00040
  22        3PX         1.15601  -0.00165  -0.90894  -1.70840   0.00347
  23        3PY         0.76411   0.00269   1.61760  -2.03712   0.00203
  24        3PZ        -0.00035  -0.39140   0.00052   0.00011   0.12405
  25        4XX         0.02200  -0.00024  -0.14525   0.02686   0.00000
  26        4YY        -0.01386   0.00003   0.04434  -0.08493   0.00013
  27        4ZZ         0.03763   0.00013   0.06288   0.06573  -0.00008
  28        4XY        -0.06334   0.00020   0.09340  -0.01529   0.00003
  29        4XZ         0.00001  -0.42936   0.00088   0.00002  -0.16143
  30        4YZ         0.00001  -0.12333   0.00027   0.00029   0.57808
  31 3   O  1S          0.02665   0.00010   0.03905   0.03993   0.00001
  32        2S          0.50121   0.00118   0.43191   0.64000   0.00032
  33        2PX         0.19982  -0.00050  -0.21923  -0.29949   0.00000
  34        2PY         0.46173  -0.00067  -0.31609   0.01741   0.00025
  35        2PZ        -0.00012  -0.06012   0.00008   0.00001   0.04815
  36        3S         -1.44003  -0.00341  -1.25651  -1.72940  -0.00069
  37        3PX        -0.37964   0.00158   0.69587   1.01665  -0.00042
  38        3PY        -1.47556   0.00193   0.93758   0.28033  -0.00110
  39        3PZ         0.00022   0.17305  -0.00027  -0.00001   0.02140
  40        4XX        -0.00192   0.00048   0.21066   0.27091   0.00001
  41        4YY         0.23713   0.00032   0.09834   0.26197   0.00021
  42        4ZZ         0.27506   0.00024   0.07178  -0.00497   0.00003
  43        4XY        -0.02029   0.00012   0.07450   0.01831  -0.00009
  44        4XZ         0.00002  -0.01694   0.00004   0.00010   0.27842
  45        4YZ        -0.00002  -0.21768   0.00041  -0.00012  -0.37085
  46 4   N  1S          0.02651   0.00009   0.05095  -0.04282   0.00005
  47        2S          0.45376   0.00210   1.14370  -0.92053   0.00087
  48        2PX        -0.03371   0.00002  -0.01166   0.15271  -0.00009
  49        2PY         0.02637  -0.00057  -0.29092   0.14690  -0.00006
  50        2PZ        -0.00003  -0.00831  -0.00001  -0.00006  -0.12662
  51        3S         -2.31044  -0.00704  -3.88486   3.22140  -0.00350
  52        3PX         0.07936   0.00108   0.65738  -0.36978  -0.00001
  53        3PY         0.78637   0.00291   1.57809  -1.25248   0.00140
  54        3PZ         0.00009   0.21889  -0.00038  -0.00002  -0.06477
  55        4XX         0.03650   0.00022   0.11998  -0.18026   0.00012
  56        4YY         0.03270   0.00040   0.20283  -0.22138   0.00023
  57        4ZZ         0.19975   0.00045   0.23811  -0.02514   0.00006
  58        4XY         0.00824   0.00000   0.03172  -0.01850  -0.00005
  59        4XZ         0.00001  -0.03692   0.00007  -0.00006  -0.19286
  60        4YZ         0.00001   0.17096  -0.00035  -0.00015  -0.30813
  61 5   H  1S          0.17039   0.00036   0.19990   0.20775  -0.00035
  62        2S          0.85736   0.00077   0.38516   0.25170  -0.00020
  63        3PX        -0.00382  -0.00003   0.01807  -0.15911   0.00000
  64        3PY        -0.00898  -0.00012   0.01869  -0.13287  -0.00001
  65        3PZ         0.00002  -0.18977   0.00038   0.00013  -0.00568
  66 6   H  1S          0.21677  -0.03631   0.13568   0.16788  -0.03494
  67        2S          0.41320   0.13475  -0.01566   0.12370  -0.11535
  68        3PX         0.01381  -0.15927   0.02154   0.09095   0.02126
  69        3PY         0.00111   0.07105   0.00501   0.08243   0.00345
  70        3PZ        -0.00325   0.00670   0.00000  -0.08958  -0.00844
  71 7   H  1S          0.21682   0.03689   0.13549   0.16791   0.03403
  72        2S          0.41269  -0.13493  -0.01531   0.12401   0.11411
  73        3PX         0.01380   0.15943   0.02096   0.09070  -0.02124
  74        3PY         0.00112  -0.07087   0.00533   0.08253  -0.00348
  75        3PZ         0.00327   0.00694   0.00001   0.08947  -0.00846
  76 8   H  1S         -0.33679   0.00106   0.54381   0.28714  -0.00024
  77        2S         -0.29675   0.00171   0.72231   0.29729  -0.00031
  78        3PX         0.03920   0.00010   0.04307  -0.01327   0.00007
  79        3PY        -0.14387   0.00011   0.04620   0.03794  -0.00008
  80        3PZ         0.00000   0.07983  -0.00015   0.00004   0.10266
                          46        47        48        49        50
                           V         V         V         V         V
     Eigenvalues --     1.44955   1.61028   1.73089   1.78588   1.79266
   1 1   C  1S         -0.10057   0.00001   0.01652   0.00010  -0.05379
   2        2S         -1.47219   0.00004  -0.01460   0.00000  -0.03140
   3        2PX        -0.14389   0.00000  -0.12197  -0.00061   0.30005
   4        2PY         0.08099   0.00002   0.06340  -0.00016   0.06667
   5        2PZ        -0.00011  -0.04007  -0.00001  -0.04162  -0.00005
   6        3S          5.13543  -0.00022  -0.70392  -0.00349   1.90139
   7        3PX         1.26386  -0.00006  -0.06535  -0.00090   0.57764
   8        3PY        -0.21228  -0.00012  -0.54594   0.00080  -0.45584
   9        3PZ         0.00057   0.26321  -0.00004   0.52564   0.00095
  10        4XX         0.03068   0.00000   0.15099   0.00047  -0.21061
  11        4YY        -0.24551  -0.00012  -0.18261  -0.00012  -0.10593
  12        4ZZ         0.03396   0.00012   0.06009  -0.00025   0.26530
  13        4XY        -0.10631   0.00005  -0.15394   0.00083  -0.39661
  14        4XZ        -0.00006   0.23604  -0.00005   0.25366   0.00054
  15        4YZ         0.00008  -0.02929   0.00014  -0.17300  -0.00012
  16 2   C  1S          0.03542   0.00000   0.00073  -0.00001   0.00879
  17        2S          0.23653  -0.00004  -0.19559  -0.00114   0.61705
  18        2PX        -0.15277   0.00004   0.06717   0.00054  -0.25644
  19        2PY        -0.03025   0.00000  -0.05656   0.00014  -0.08110
  20        2PZ        -0.00002   0.03200   0.00000   0.00448   0.00000
  21        3S         -0.09330   0.00005  -0.15125   0.00230  -1.38162
  22        3PX         2.93223  -0.00023  -1.20307  -0.00281   1.42640
  23        3PY         0.82066   0.00008   0.53885  -0.00360   2.12746
  24        3PZ        -0.00015  -0.30459   0.00004  -0.42838  -0.00078
  25        4XX         0.02066   0.00002   0.17324   0.00097  -0.48875
  26        4YY         0.08791  -0.00002  -0.13908  -0.00054   0.26281
  27        4ZZ        -0.05274   0.00000  -0.06129  -0.00037   0.19643
  28        4XY        -0.01763   0.00002  -0.14381   0.00005   0.00517
  29        4XZ         0.00020   0.05860  -0.00002   0.49007   0.00091
  30        4YZ        -0.00049   0.11516   0.00000   0.10094   0.00017
  31 3   O  1S          0.04315   0.00000  -0.02962   0.00004  -0.02579
  32        2S          0.81470  -0.00007  -0.62589   0.00074  -0.46852
  33        2PX        -0.16670   0.00002   0.00332  -0.00023   0.12497
  34        2PY         0.28519  -0.00002  -0.23688   0.00006  -0.02299
  35        2PZ        -0.00003  -0.02859  -0.00001  -0.04222  -0.00008
  36        3S         -2.13162   0.00021   1.76818  -0.00242   1.57797
  37        3PX         0.19446  -0.00004  -0.22516   0.00123  -0.73164
  38        3PY        -1.10407   0.00007   0.73312  -0.00016   0.11026
  39        3PZ        -0.00004   0.27525   0.00002   0.05062   0.00011
  40        4XX         0.16410   0.00005  -0.74486  -0.00001  -0.03503
  41        4YY         0.42185  -0.00005   0.13269   0.00045  -0.28591
  42        4ZZ         0.06690  -0.00004   0.16312   0.00001   0.04551
  43        4XY        -0.05902   0.00003   0.01981   0.00009  -0.04436
  44        4XZ        -0.00024   0.59054   0.00005  -0.19973  -0.00039
  45        4YZ         0.00040   0.41974   0.00003  -0.03164  -0.00004
  46 4   N  1S          0.03311   0.00000  -0.00321  -0.00004   0.02432
  47        2S          0.51177  -0.00003   0.15078  -0.00024   0.12994
  48        2PX        -0.02817   0.00000   0.02570  -0.00034   0.16954
  49        2PY        -0.01071   0.00001  -0.20849  -0.00022   0.11975
  50        2PZ         0.00013  -0.01652   0.00001  -0.09976  -0.00018
  51        3S         -2.10369   0.00003  -0.16076   0.00274  -1.55538
  52        3PX        -0.20798   0.00004   0.20619   0.00030  -0.11569
  53        3PY         0.89911  -0.00003   0.06146  -0.00089   0.48362
  54        3PZ         0.00000   0.06748  -0.00002   0.18207   0.00030
  55        4XX         0.05549   0.00000   0.38282   0.00016  -0.07228
  56        4YY         0.14850  -0.00001  -0.11097   0.00019  -0.10129
  57        4ZZ         0.03875   0.00001  -0.17971  -0.00041   0.21786
  58        4XY        -0.05235  -0.00001   0.13698  -0.00069   0.34705
  59        4XZ         0.00019   0.00607  -0.00004   0.40450   0.00085
  60        4YZ         0.00025  -0.03924   0.00002  -0.43275  -0.00081
  61 5   H  1S         -0.29719   0.00005   0.07842   0.00043  -0.16402
  62        2S         -0.19776   0.00011   0.23691  -0.00013   0.11101
  63        3PX        -0.07845  -0.00005  -0.16459  -0.00022   0.04147
  64        3PY        -0.07210  -0.00006  -0.13181  -0.00004  -0.04008
  65        3PZ         0.00009  -0.04722   0.00004  -0.06318  -0.00011
  66 6   H  1S         -0.38939   0.04523   0.03555   0.14059  -0.25907
  67        2S         -0.58665   0.04291  -0.10026   0.14292  -0.06146
  68        3PX         0.05897  -0.11785   0.08587  -0.26739   0.07806
  69        3PY         0.02925   0.01637   0.00206  -0.01120   0.08558
  70        3PZ        -0.03413   0.03297  -0.04381   0.05187  -0.04328
  71 7   H  1S         -0.38946  -0.04517   0.03563  -0.13969  -0.25952
  72        2S         -0.58707  -0.04306  -0.10013  -0.14271  -0.06178
  73        3PX         0.05893   0.11787   0.08569   0.26716   0.07901
  74        3PY         0.02933  -0.01631   0.00210   0.01097   0.08570
  75        3PZ         0.03412   0.03305   0.04377   0.05183   0.04345
  76 8   H  1S         -0.07253  -0.00003   0.01027  -0.00001  -0.01806
  77        2S         -0.16534   0.00004  -0.05667   0.00017  -0.10646
  78        3PX         0.07149  -0.00004   0.19256  -0.00004   0.00752
  79        3PY        -0.07360   0.00001  -0.09129   0.00010  -0.04711
  80        3PZ        -0.00012  -0.37812  -0.00002   0.14166   0.00026
                          51        52        53        54        55
                           V         V         V         V         V
     Eigenvalues --     1.84487   1.91781   1.91810   2.03640   2.03960
   1 1   C  1S          0.00542  -0.00528  -0.00001  -0.02467  -0.00601
   2        2S         -0.19152  -0.35915  -0.00140  -0.15588  -0.09476
   3        2PX        -0.15370  -0.10503  -0.00043   0.02064  -0.00246
   4        2PY        -0.04225  -0.01556  -0.00007   0.08863  -0.03819
   5        2PZ         0.00000   0.00006  -0.02001   0.00003   0.00008
   6        3S          0.24108   0.29026   0.00085   1.11712   0.58903
   7        3PX         0.77273  -0.32061  -0.00140   0.70385   0.48774
   8        3PY        -0.94478   0.54013   0.00209  -0.60999   0.28075
   9        3PZ        -0.00003   0.00109  -0.26048  -0.00010  -0.00042
  10        4XX         0.35571  -0.13952  -0.00049  -0.13429   0.39049
  11        4YY        -0.42612   0.21834   0.00106  -0.35095  -0.07222
  12        4ZZ         0.11887  -0.03952  -0.00041   0.46454  -0.27613
  13        4XY        -0.11192   0.13436   0.00044   0.49388   0.05872
  14        4XZ        -0.00015   0.00020  -0.05559  -0.00013   0.00030
  15        4YZ         0.00032  -0.00097   0.18392   0.00092   0.00041
  16 2   C  1S          0.01952   0.03144   0.00012   0.02051  -0.00846
  17        2S          0.01199   0.39232   0.00140   0.16326  -0.36697
  18        2PX         0.16026  -0.06867  -0.00023  -0.01737   0.13087
  19        2PY        -0.09363   0.03596   0.00015  -0.06365   0.09118
  20        2PZ         0.00000  -0.00019   0.04758  -0.00002  -0.00007
  21        3S         -0.23597  -2.17838  -0.00808  -0.51237   0.49324
  22        3PX        -0.68363  -0.89901  -0.00381   0.87611   0.90260
  23        3PY         3.36098  -2.25766  -0.00874   0.72575   0.22901
  24        3PZ         0.00007  -0.00131   0.34909   0.00004   0.00002
  25        4XX         0.09087   0.04016   0.00020   0.11595   0.12007
  26        4YY        -0.11453  -0.33575  -0.00131  -0.13307   0.27518
  27        4ZZ         0.05608   0.35471   0.00135   0.01486  -0.51225
  28        4XY         0.50888  -0.03116  -0.00006  -0.34603  -0.09374
  29        4XZ        -0.00007   0.00097  -0.24185  -0.00007  -0.00006
  30        4YZ        -0.00004   0.00035  -0.08669   0.00005   0.00003
  31 3   O  1S         -0.07853   0.00734   0.00002   0.00981   0.01139
  32        2S         -0.68966   0.10828   0.00042  -0.20419  -0.11532
  33        2PX        -0.05041  -0.17812  -0.00072   0.10574   0.13933
  34        2PY         0.14431  -0.03771  -0.00014  -0.06717  -0.12759
  35        2PZ        -0.00001  -0.00029   0.07923  -0.00002  -0.00004
  36        3S          3.20257  -0.41893  -0.00156   0.37591  -0.18368
  37        3PX        -0.81258   0.49741   0.00197  -0.22445  -0.21723
  38        3PY         0.28822   0.46893   0.00188  -0.24232  -0.22025
  39        3PZ         0.00005   0.00059  -0.16190   0.00004   0.00007
  40        4XX        -0.22072  -0.36364  -0.00141   0.04568   0.09468
  41        4YY        -0.40032   0.25499   0.00102  -0.05957   0.16427
  42        4ZZ         0.10092   0.20372   0.00073  -0.01494  -0.28794
  43        4XY         0.10036   0.05781   0.00024  -0.10217  -0.01898
  44        4XZ        -0.00003  -0.00105   0.28780  -0.00013  -0.00020
  45        4YZ         0.00004   0.00089  -0.23250   0.00008   0.00010
  46 4   N  1S          0.03334  -0.04050  -0.00016   0.00709   0.00462
  47        2S          0.35170  -0.36885  -0.00140   0.20463   0.14192
  48        2PX        -0.11209  -0.11050  -0.00045   0.01054   0.08517
  49        2PY         0.14676  -0.21160  -0.00081  -0.17539   0.08389
  50        2PZ         0.00003  -0.00027   0.06913   0.00002  -0.00002
  51        3S         -2.51775   2.91277   0.01122  -0.73908  -0.75026
  52        3PX         0.75084  -0.22087  -0.00076  -0.10561  -0.13402
  53        3PY         0.63470  -0.98245  -0.00380   0.35294   0.32000
  54        3PZ        -0.00008   0.00066  -0.16192  -0.00005   0.00003
  55        4XX        -0.29461  -0.55838  -0.00219   0.01977  -0.34660
  56        4YY         0.22109  -0.11595  -0.00042  -0.04971  -0.13998
  57        4ZZ         0.19205   0.59056   0.00227   0.15221   0.42440
  58        4XY        -0.16114   0.03357   0.00013   0.03596   0.51447
  59        4XZ        -0.00007  -0.00324   0.84106   0.00008  -0.00010
  60        4YZ         0.00013  -0.00001  -0.00242   0.00004  -0.00008
  61 5   H  1S          0.21649  -0.16037  -0.00070   0.55118  -0.04980
  62        2S          0.37940  -0.26546  -0.00107  -0.01975  -0.01424
  63        3PX        -0.09940   0.13441   0.00059  -0.18979  -0.11789
  64        3PY        -0.03350   0.09054   0.00040   0.17563  -0.07418
  65        3PZ         0.00000  -0.00025   0.06483   0.00031   0.00031
  66 6   H  1S         -0.03003  -0.04471  -0.16139  -0.35110   0.12742
  67        2S         -0.09564  -0.03660   0.01427  -0.00215   0.00171
  68        3PX        -0.08125   0.04607   0.14525  -0.02848  -0.09522
  69        3PY         0.04816  -0.03687   0.01333   0.19523  -0.02822
  70        3PZ        -0.06178   0.03537   0.00433   0.02036  -0.03120
  71 7   H  1S         -0.02991  -0.04616   0.16121  -0.35041   0.12816
  72        2S         -0.09539  -0.03664  -0.01461  -0.00220   0.00157
  73        3PX        -0.08143   0.04726  -0.14496  -0.02842  -0.09500
  74        3PY         0.04835  -0.03686  -0.01368   0.19466  -0.02854
  75        3PZ         0.06177  -0.03545   0.00402  -0.02051   0.03146
  76 8   H  1S         -0.23708   0.13810   0.00052  -0.04811  -0.22093
  77        2S         -0.07562   0.07430   0.00032  -0.23611  -0.01717
  78        3PX        -0.08527   0.13224   0.00054  -0.19308  -0.00844
  79        3PY         0.04087  -0.04697  -0.00019   0.09944   0.02294
  80        3PZ         0.00000   0.00013  -0.03620   0.00001   0.00002
                          56        57        58        59        60
                           V         V         V         V         V
     Eigenvalues --     2.06018   2.09924   2.24622   2.25249   2.36178
   1 1   C  1S          0.00002   0.00002  -0.00004  -0.02531  -0.07961
   2        2S          0.00017   0.00011  -0.00027  -0.15547  -0.36810
   3        2PX        -0.00004  -0.00007   0.00014   0.09582   0.21813
   4        2PY        -0.00003   0.00002  -0.00009  -0.13361   0.03965
   5        2PZ         0.06011   0.11848   0.03703   0.00001   0.00005
   6        3S         -0.00125  -0.00107   0.00173   1.07231   2.84559
   7        3PX        -0.00074  -0.00067   0.00060   0.33178   1.44734
   8        3PY        -0.00001  -0.00013   0.00063   0.71083   0.46048
   9        3PZ        -0.30058  -0.51930  -0.47610   0.00030  -0.00003
  10        4XX        -0.00014  -0.00028   0.00017   0.04930   0.53292
  11        4YY         0.00049   0.00065   0.00011   0.13818  -0.21791
  12        4ZZ        -0.00036  -0.00038  -0.00028  -0.19884  -0.30741
  13        4XY        -0.00040  -0.00016   0.00011   0.10327   0.14839
  14        4XZ         0.12332   0.22266  -0.23229   0.00024   0.00008
  15        4YZ         0.31879   0.58522  -0.00098  -0.00018  -0.00005
  16 2   C  1S         -0.00001  -0.00001   0.00003   0.02201   0.09370
  17        2S          0.00009   0.00011   0.00044   0.29745   0.40780
  18        2PX        -0.00004  -0.00011   0.00010   0.05989   0.32310
  19        2PY        -0.00007  -0.00002  -0.00009  -0.14588   0.06839
  20        2PZ        -0.04354  -0.07375   0.18008  -0.00015  -0.00005
  21        3S          0.00030   0.00021  -0.00113  -0.34467  -2.21193
  22        3PX        -0.00131  -0.00109   0.00126   0.94657   2.10504
  23        3PY        -0.00017  -0.00063   0.00006   0.19158  -0.44328
  24        3PZ         0.05099   0.07019   0.50194  -0.00033   0.00000
  25        4XX        -0.00014   0.00001  -0.00004   0.04487  -0.35134
  26        4YY        -0.00007  -0.00019  -0.00009  -0.15009  -0.11984
  27        4ZZ         0.00028   0.00025   0.00013   0.11699   0.69784
  28        4XY         0.00033   0.00004  -0.00032  -0.36300  -0.02661
  29        4XZ        -0.03544  -0.06640   0.39805  -0.00034  -0.00018
  30        4YZ         0.02007   0.04341  -0.01677   0.00000  -0.00002
  31 3   O  1S         -0.00002  -0.00001   0.00003   0.02951   0.00593
  32        2S          0.00021   0.00012   0.00016   0.11805   0.49766
  33        2PX        -0.00017  -0.00012   0.00005   0.07036  -0.10891
  34        2PY         0.00010   0.00005  -0.00006  -0.05816   0.12967
  35        2PZ        -0.01282  -0.03808   0.08569  -0.00007   0.00001
  36        3S          0.00001  -0.00009  -0.00066  -0.58502  -1.18499
  37        3PX         0.00027   0.00031   0.00001   0.01816   0.22923
  38        3PY         0.00039   0.00023  -0.00021  -0.25644  -0.46271
  39        3PZ         0.02527   0.07245  -0.35937   0.00026   0.00003
  40        4XX        -0.00012  -0.00012   0.00021   0.20981   0.05502
  41        4YY        -0.00012   0.00000  -0.00031  -0.32803  -0.09417
  42        4ZZ         0.00028   0.00013   0.00030   0.29320   0.17131
  43        4XY         0.00010   0.00005  -0.00013  -0.10534  -0.06277
  44        4XZ        -0.10844  -0.18894   0.38755  -0.00027  -0.00010
  45        4YZ         0.06613   0.12763  -0.40387   0.00029   0.00005
  46 4   N  1S          0.00000  -0.00001   0.00001   0.00823  -0.00099
  47        2S         -0.00015  -0.00011   0.00017   0.30899   0.10781
  48        2PX        -0.00007  -0.00007  -0.00003  -0.07695  -0.01157
  49        2PY         0.00008  -0.00008  -0.00014  -0.17860  -0.10560
  50        2PZ        -0.00437  -0.01635   0.03661   0.00000   0.00000
  51        3S          0.00055   0.00080  -0.00029  -0.66772   0.19486
  52        3PX         0.00028   0.00014  -0.00014   0.03953  -0.48041
  53        3PY        -0.00032  -0.00029   0.00019   0.32761   0.13085
  54        3PZ         0.00375   0.02358  -0.26491   0.00016   0.00005
  55        4XX         0.00016   0.00007  -0.00002  -0.09989   0.40730
  56        4YY         0.00016   0.00010  -0.00001   0.07141  -0.38113
  57        4ZZ        -0.00036  -0.00013   0.00014   0.14970   0.00235
  58        4XY        -0.00035  -0.00038  -0.00002  -0.10458   0.29288
  59        4XZ        -0.04465  -0.06690  -0.03101   0.00003  -0.00003
  60        4YZ        -0.04294  -0.06762   0.58944  -0.00046  -0.00015
  61 5   H  1S         -0.00034  -0.00017  -0.00017  -0.18215  -0.09712
  62        2S          0.00009   0.00001  -0.00035  -0.25376  -0.05247
  63        3PX         0.00014   0.00011  -0.00050  -0.42316  -0.01264
  64        3PY         0.00017  -0.00010  -0.00036  -0.45464   0.01391
  65        3PZ         0.61660  -0.08744   0.22237  -0.00010   0.00007
  66 6   H  1S         -0.23855  -0.43234  -0.04142   0.03867  -0.04028
  67        2S          0.01470   0.05299  -0.16776   0.09608  -0.09225
  68        3PX        -0.16944  -0.00345  -0.33165   0.27799  -0.32531
  69        3PY         0.43455  -0.19567  -0.11647  -0.22932  -0.05674
  70        3PZ        -0.10935   0.42707   0.18858  -0.00260  -0.00062
  71 7   H  1S          0.23890   0.43244   0.04144   0.03851  -0.04026
  72        2S         -0.01475  -0.05294   0.16789   0.09570  -0.09226
  73        3PX         0.16963   0.00366   0.33214   0.27709  -0.32529
  74        3PY        -0.43490   0.19590   0.11622  -0.22964  -0.05664
  75        3PZ        -0.10893   0.42689   0.18854   0.00232   0.00079
  76 8   H  1S          0.00017   0.00015   0.00024   0.23120   0.17053
  77        2S          0.00026   0.00004   0.00000  -0.03821  -0.13059
  78        3PX         0.00012   0.00006  -0.00022  -0.25999  -0.11940
  79        3PY        -0.00010  -0.00002   0.00002   0.04885   0.02876
  80        3PZ         0.00222   0.00982   0.13433  -0.00009  -0.00007
                          61        62        63        64        65
                           V         V         V         V         V
     Eigenvalues --     2.45963   2.51858   2.54843   2.60068   2.64129
   1 1   C  1S         -0.00653  -0.00002   0.02308   0.00000  -0.00669
   2        2S         -0.01727  -0.00004  -0.05237   0.00003   0.12650
   3        2PX        -0.03291   0.00006  -0.12402   0.00003   0.08403
   4        2PY         0.13883   0.00009  -0.12681  -0.00012  -0.12631
   5        2PZ        -0.00005   0.08674   0.00005  -0.08231   0.00003
   6        3S         -0.38276   0.00061  -0.60127  -0.00010  -0.26870
   7        3PX        -0.05341   0.00030  -0.40365  -0.00006   0.46163
   8        3PY         0.08915   0.00042  -0.56933   0.00016  -0.45393
   9        3PZ         0.00008   0.53964   0.00040  -0.03553   0.00002
  10        4XX         0.15387   0.00008   0.08238   0.00002  -0.01911
  11        4YY        -0.04230   0.00018   0.02713  -0.00006  -0.03351
  12        4ZZ        -0.04606  -0.00024  -0.11654   0.00003   0.05524
  13        4XY         0.25575   0.00021  -0.34168  -0.00010  -0.29332
  14        4XZ        -0.00005   0.29716   0.00024  -0.16176   0.00006
  15        4YZ         0.00009   0.33288   0.00001   0.00045  -0.00001
  16 2   C  1S         -0.00938   0.00004  -0.03756   0.00000   0.05164
  17        2S         -0.28332  -0.00004  -0.12074   0.00001  -0.32680
  18        2PX         0.11515   0.00009  -0.04473  -0.00005  -0.24091
  19        2PY         0.13751   0.00000   0.02862   0.00020   0.65591
  20        2PZ         0.00000   0.02884   0.00001   0.05835   0.00000
  21        3S         -0.49961  -0.00115   1.86310   0.00004  -0.59774
  22        3PX        -0.69018   0.00024  -0.23185  -0.00005  -0.74841
  23        3PY        -1.32394  -0.00033   0.20435   0.00002   1.76989
  24        3PZ        -0.00003   0.03186  -0.00005  -0.00204   0.00003
  25        4XX        -0.29775  -0.00028   0.37615   0.00002  -0.11385
  26        4YY         0.40366   0.00006  -0.18261   0.00001   0.03801
  27        4ZZ        -0.17713   0.00037  -0.30314   0.00000   0.36931
  28        4XY         0.02768   0.00016  -0.17682   0.00001  -0.10988
  29        4XZ        -0.00007   0.56613   0.00035  -0.27333   0.00011
  30        4YZ         0.00001   0.20214   0.00006   0.88165  -0.00015
  31 3   O  1S          0.03062  -0.00002   0.02097   0.00000  -0.03610
  32        2S          0.34869  -0.00005   0.32347  -0.00010  -0.86630
  33        2PX        -0.15013   0.00000  -0.10222   0.00002   0.07269
  34        2PY        -0.19826   0.00015  -0.17077  -0.00006  -0.16653
  35        2PZ         0.00000   0.00064   0.00001  -0.02338   0.00001
  36        3S         -0.97999   0.00028  -0.79992   0.00020   2.63733
  37        3PX         0.55372  -0.00015   0.43891  -0.00010  -0.88741
  38        3PY         0.71688  -0.00001  -0.04541   0.00014   0.99118
  39        3PZ         0.00002  -0.16045  -0.00014   0.19499  -0.00001
  40        4XX         0.03508   0.00004  -0.08821   0.00001   0.13944
  41        4YY        -0.25386   0.00002  -0.05139   0.00005   0.16849
  42        4ZZ         0.49713  -0.00024   0.32277  -0.00006  -0.50912
  43        4XY        -0.40051   0.00019  -0.39951  -0.00009  -0.40722
  44        4XZ        -0.00002   0.18522   0.00020  -0.38485   0.00004
  45        4YZ         0.00007   0.02879   0.00005   0.47818  -0.00008
  46 4   N  1S         -0.00714  -0.00002   0.01121   0.00001   0.01467
  47        2S         -0.52191  -0.00007   0.25514   0.00008   0.44290
  48        2PX         0.07174  -0.00002  -0.02609  -0.00001  -0.02413
  49        2PY         0.19131   0.00001  -0.07761  -0.00001  -0.06502
  50        2PZ        -0.00001   0.00657  -0.00001  -0.04864   0.00001
  51        3S          1.69313   0.00063  -0.92047  -0.00021  -1.49776
  52        3PX        -0.14823  -0.00011   0.16184   0.00007   0.63878
  53        3PY        -0.73218  -0.00025   0.42589   0.00014   0.58565
  54        3PZ         0.00004  -0.15353  -0.00005  -0.16641  -0.00001
  55        4XX        -0.16644   0.00001   0.02460   0.00005  -0.13558
  56        4YY         0.16396   0.00003  -0.07133  -0.00009  -0.09246
  57        4ZZ        -0.04371  -0.00014   0.10896   0.00008   0.21557
  58        4XY        -0.10190   0.00008  -0.04572  -0.00009  -0.59711
  59        4XZ         0.00003   0.01623  -0.00002   0.32808  -0.00004
  60        4YZ        -0.00004   0.39096   0.00017   0.55949  -0.00005
  61 5   H  1S          0.08596  -0.00001  -0.05390  -0.00002   0.01279
  62        2S         -0.06893  -0.00006   0.31919  -0.00003   0.38984
  63        3PX        -0.11998  -0.00004   0.48591   0.00008  -0.10566
  64        3PY         0.10163  -0.00020   0.16244  -0.00009  -0.19774
  65        3PZ        -0.00014  -0.47840  -0.00019  -0.04506   0.00014
  66 6   H  1S          0.00092  -0.05814   0.03691   0.01326  -0.00004
  67        2S          0.02667   0.34057  -0.20282  -0.07184  -0.02167
  68        3PX        -0.03617   0.26191  -0.01024  -0.15738  -0.33359
  69        3PY        -0.00659   0.27743   0.19067  -0.04897   0.03323
  70        3PZ         0.04051  -0.15372  -0.17015  -0.05391  -0.04991
  71 7   H  1S          0.00098   0.05809   0.03693  -0.01322  -0.00002
  72        2S          0.02650  -0.34054  -0.20309   0.07190  -0.02152
  73        3PX        -0.03618  -0.26203  -0.01051   0.15736  -0.33359
  74        3PY        -0.00661  -0.27765   0.19065   0.04866   0.03327
  75        3PZ        -0.04049  -0.15359   0.16985  -0.05399   0.04977
  76 8   H  1S          0.79391  -0.00017   0.43287  -0.00002  -0.15536
  77        2S         -0.08384  -0.00002  -0.10234   0.00005   0.07970
  78        3PX         0.25830   0.00036  -0.53274  -0.00003   0.16700
  79        3PY        -0.52215  -0.00002  -0.00033  -0.00002  -0.14377
  80        3PZ        -0.00004   0.32243   0.00026   0.07241  -0.00001
                          66        67        68        69        70
                           V         V         V         V         V
     Eigenvalues --     2.76764   2.78197   2.85463   2.88713   2.94653
   1 1   C  1S          0.00000   0.01006   0.04587   0.00242   0.00001
   2        2S          0.00003   0.04623  -0.28969   0.19047  -0.00009
   3        2PX         0.00001   0.03022  -0.10779   0.01655  -0.00003
   4        2PY         0.00001   0.02584   0.05165  -0.06474   0.00000
   5        2PZ        -0.03686   0.00003  -0.00003   0.00010   0.00230
   6        3S         -0.00001  -0.64386  -0.32984  -0.41742  -0.00007
   7        3PX         0.00010   0.09936   0.12855  -0.49332   0.00009
   8        3PY         0.00004   0.22608   0.37355   0.55128  -0.00022
   9        3PZ        -0.24620   0.00000   0.00013  -0.00034  -0.29639
  10        4XX        -0.00010  -0.34633  -0.39949   0.04410  -0.00015
  11        4YY        -0.00009   0.28005   0.06593  -0.52741  -0.00036
  12        4ZZ         0.00018   0.04273   0.49937   0.35733   0.00057
  13        4XY         0.00005  -0.10157  -0.26714  -0.01332   0.00021
  14        4XZ         0.07170   0.00001  -0.00003   0.00003   0.71584
  15        4YZ        -0.14741  -0.00013   0.00032   0.00036  -0.41074
  16 2   C  1S          0.00000  -0.00064  -0.06260   0.03783  -0.00001
  17        2S          0.00006  -0.29056   0.52617  -0.54476   0.00005
  18        2PX         0.00000  -0.22220   0.14096  -0.41960   0.00007
  19        2PY        -0.00005  -0.60364   0.25832   0.18444  -0.00008
  20        2PZ        -0.04988   0.00002  -0.00003   0.00000  -0.03518
  21        3S         -0.00018  -1.38724   1.67900  -1.37079   0.00029
  22        3PX         0.00007  -0.68591   0.57075  -0.77193   0.00005
  23        3PY        -0.00013  -1.57663  -0.14968  -0.43797  -0.00001
  24        3PZ         0.13616   0.00004  -0.00004   0.00015   0.16475
  25        4XX        -0.00001  -0.03134   0.27191   0.05217   0.00012
  26        4YY         0.00002  -0.25250   0.21840  -0.41403   0.00002
  27        4ZZ        -0.00004   0.13945  -0.60508   0.37114  -0.00017
  28        4XY        -0.00002  -0.20220   0.28967   0.38501  -0.00005
  29        4XZ        -0.18063   0.00004   0.00008   0.00008   0.26634
  30        4YZ        -0.14651   0.00013  -0.00011  -0.00012   0.27809
  31 3   O  1S          0.00001  -0.01181   0.01157  -0.04125   0.00002
  32        2S          0.00003   0.23609   0.46721  -0.38845   0.00004
  33        2PX         0.00001  -0.07612  -0.07422  -0.06428   0.00002
  34        2PY         0.00001  -0.00955  -0.00797  -0.08077   0.00002
  35        2PZ        -0.00322   0.00001   0.00000   0.00001   0.01762
  36        3S         -0.00014  -0.44046  -1.26409   1.41428  -0.00035
  37        3PX         0.00003   0.55136   0.39723  -0.45433   0.00007
  38        3PY        -0.00004   0.06358  -0.47386   0.76855  -0.00012
  39        3PZ        -0.32751   0.00000  -0.00003  -0.00003   0.00433
  40        4XX         0.00004  -0.47098  -0.04828  -0.03318   0.00014
  41        4YY         0.00000   0.24824  -0.09546   0.39460  -0.00015
  42        4ZZ         0.00000   0.08637   0.21309  -0.42598   0.00016
  43        4XY         0.00008  -0.10484   0.11197  -0.62016   0.00011
  44        4XZ         0.44561  -0.00003   0.00004   0.00003  -0.11821
  45        4YZ         0.63459  -0.00001  -0.00010  -0.00005  -0.13119
  46 4   N  1S          0.00000  -0.04908   0.04644  -0.02407   0.00001
  47        2S         -0.00008  -0.52429   0.18261  -0.25030  -0.00003
  48        2PX         0.00001  -0.04658   0.03860  -0.04745   0.00000
  49        2PY         0.00001  -0.15349   0.18269  -0.08205   0.00001
  50        2PZ         0.02303   0.00000   0.00001   0.00002  -0.02076
  51        3S          0.00020   2.68157  -1.26850   1.35108  -0.00008
  52        3PX        -0.00006  -0.33604   0.07076  -0.13550  -0.00002
  53        3PY        -0.00009  -1.33763   0.77629  -0.66779   0.00002
  54        3PZ        -0.00161   0.00001  -0.00001  -0.00001  -0.11491
  55        4XX         0.00000  -0.38144   0.32814  -0.05255   0.00003
  56        4YY         0.00003   0.82024  -0.65616   0.25577   0.00002
  57        4ZZ         0.00000  -0.42032   0.40497  -0.18169   0.00002
  58        4XY         0.00002   0.32855  -0.12276   0.28623   0.00003
  59        4XZ        -0.01887   0.00002  -0.00003  -0.00005   0.02701
  60        4YZ        -0.13614   0.00005   0.00000  -0.00005   0.24828
  61 5   H  1S          0.00000  -0.00433  -0.04586   0.04264   0.00001
  62        2S         -0.00004   0.08429  -0.01814  -0.41050   0.00009
  63        3PX        -0.00012  -0.27200  -0.15721   0.22100  -0.00001
  64        3PY         0.00008  -0.25116  -0.16226   0.11206   0.00028
  65        3PZ         0.25388   0.00005  -0.00014   0.00002   0.64380
  66 6   H  1S         -0.01321   0.03263   0.02052   0.03732  -0.00505
  67        2S         -0.11330   0.12335   0.20707   0.15504  -0.13568
  68        3PX         0.05008  -0.36177  -0.27073   0.15837   0.41469
  69        3PY        -0.11558   0.09702  -0.18949  -0.43300  -0.23327
  70        3PZ         0.03208   0.08640   0.37223   0.23853   0.05177
  71 7   H  1S          0.01320   0.03261   0.02052   0.03723   0.00504
  72        2S          0.11344   0.12331   0.20675   0.15514   0.13566
  73        3PX        -0.05021  -0.36172  -0.27063   0.15834  -0.41489
  74        3PY         0.11552   0.09693  -0.18997  -0.43326   0.23326
  75        3PZ         0.03185  -0.08650  -0.37218  -0.23802   0.05135
  76 8   H  1S          0.00001   0.16845   0.10458  -0.04220   0.00006
  77        2S          0.00000  -0.05618  -0.07299   0.05064  -0.00006
  78        3PX         0.00007  -0.32833  -0.15707  -0.25176   0.00016
  79        3PY         0.00001   0.19277  -0.05821  -0.04736  -0.00006
  80        3PZ         0.99888  -0.00005  -0.00003   0.00001  -0.17096
                          71        72        73        74        75
                           V         V         V         V         V
     Eigenvalues --     3.07649   3.20680   3.31541   3.52689   3.53946
   1 1   C  1S          0.04178   0.05295  -0.09681   0.00000  -0.00201
   2        2S         -0.28810  -0.50835   0.64324   0.00002  -0.00336
   3        2PX        -0.04835   0.10632  -0.48770   0.00005  -0.19582
   4        2PY         0.04127  -0.06765  -0.14694  -0.00002   0.81916
   5        2PZ         0.00004  -0.00002   0.00002  -0.86971   0.00000
   6        3S          0.01732   0.09970   1.05104   0.00016   0.16806
   7        3PX         0.21189   0.35037  -0.27452   0.00010  -0.09600
   8        3PY        -0.25523   0.04553  -0.05864  -0.00001   0.68228
   9        3PZ         0.00002   0.00010   0.00003  -0.65103  -0.00005
  10        4XX        -0.28359   0.16466  -0.63438   0.00012   0.42356
  11        4YY         0.53727  -0.18380   0.21017   0.00090   0.29642
  12        4ZZ        -0.15677   0.25458   0.25650  -0.00108  -0.74570
  13        4XY         0.17456  -0.12611  -0.29617  -0.00025  -0.87779
  14        4XZ        -0.00005  -0.00014  -0.00004   0.44066   0.00029
  15        4YZ        -0.00041   0.00031   0.00000   1.07263  -0.00108
  16 2   C  1S          0.03100   0.02955   0.00279   0.00003   0.02383
  17        2S         -0.27062  -0.22907  -0.09251   0.00000  -0.03992
  18        2PX        -0.27184   0.02415  -0.13390  -0.00001  -0.02471
  19        2PY         0.25704  -0.44206  -0.18379  -0.00002  -0.00915
  20        2PZ         0.00002   0.00000  -0.00001   0.00439   0.00000
  21        3S         -0.64711  -0.86481  -0.02904  -0.00072  -0.43030
  22        3PX         0.01276   0.45232   0.19072  -0.00002   0.08632
  23        3PY         0.86316  -0.75634  -0.21201   0.00025   0.10739
  24        3PZ        -0.00001  -0.00003   0.00002   0.08162   0.00002
  25        4XX         0.37645   0.64894   0.51147  -0.00002   0.08095
  26        4YY        -0.47198  -0.64118  -0.31457  -0.00002  -0.10231
  27        4ZZ         0.25657   0.15769   0.00122   0.00021   0.16411
  28        4XY         0.80826  -0.56951  -0.03385  -0.00001  -0.11821
  29        4XZ        -0.00007  -0.00003   0.00001   0.04702  -0.00002
  30        4YZ         0.00006  -0.00004   0.00001  -0.08157   0.00011
  31 3   O  1S         -0.04874   0.02934  -0.02949  -0.00009  -0.00772
  32        2S         -0.25295   0.07335   0.12161  -0.00002  -0.09242
  33        2PX        -0.15999   0.03086  -0.06678  -0.00009  -0.00258
  34        2PY        -0.01634   0.00102  -0.08479  -0.00016  -0.04938
  35        2PZ         0.00001   0.00000   0.00001   0.00618  -0.00001
  36        3S          1.51336  -0.58582   0.11341   0.00124   0.37485
  37        3PX        -0.69094  -0.11345  -0.14839  -0.00033  -0.21254
  38        3PY         0.40674  -0.39813  -0.29011  -0.00014  -0.04308
  39        3PZ         0.00006   0.00000  -0.00001  -0.03885   0.00004
  40        4XX         0.27379   0.65294   0.16614  -0.00020   0.09704
  41        4YY         0.08281  -0.60257  -0.21411   0.00002  -0.01576
  42        4ZZ        -0.35129   0.11778  -0.13191  -0.00039  -0.08412
  43        4XY        -0.38049   0.29091   0.19980   0.00022   0.05140
  44        4XZ        -0.00007  -0.00001  -0.00001   0.01969  -0.00005
  45        4YZ         0.00007  -0.00002  -0.00003  -0.04796   0.00003
  46 4   N  1S         -0.01530  -0.01064   0.01405  -0.00003  -0.03732
  47        2S          0.15916  -0.12317  -0.06920   0.00007   0.19241
  48        2PX        -0.06395  -0.11534  -0.04524  -0.00001  -0.02176
  49        2PY         0.00833  -0.30748  -0.11629  -0.00003  -0.06403
  50        2PZ         0.00000   0.00001   0.00001  -0.00237   0.00000
  51        3S         -0.41660   1.05352   0.16176   0.00021   0.12744
  52        3PX        -0.04481  -0.32873  -0.15789   0.00000   0.02992
  53        3PY         0.18682  -0.55543  -0.08310  -0.00008  -0.02430
  54        3PZ        -0.00001   0.00005  -0.00002   0.01656  -0.00004
  55        4XX         0.19436  -0.08542   0.08298  -0.00009  -0.16531
  56        4YY        -0.29877   0.51361   0.14546  -0.00003  -0.03296
  57        4ZZ        -0.06619  -0.13695   0.02354  -0.00011  -0.12935
  58        4XY         0.37737   0.38363   0.21307   0.00000  -0.00791
  59        4XZ         0.00001  -0.00003   0.00000  -0.04118   0.00003
  60        4YZ         0.00002  -0.00007   0.00000  -0.02624   0.00004
  61 5   H  1S          0.06456   0.11550  -0.33088  -0.00028  -0.73655
  62        2S          0.13927   0.25638  -0.36873  -0.00027  -0.62442
  63        3PX        -0.21509   0.34617  -0.41562  -0.00028  -0.65811
  64        3PY        -0.28875  -0.22484   0.53437   0.00038   0.90856
  65        3PZ         0.00016   0.00002  -0.00030   0.03763  -0.00047
  66 6   H  1S         -0.00419   0.02946  -0.33662  -0.64900   0.37798
  67        2S          0.07644   0.09514  -0.36034  -0.51669   0.32119
  68        3PX         0.09124  -0.10148  -0.18782  -0.22088   0.14080
  69        3PY         0.35483   0.02714  -0.38132  -0.58714   0.27127
  70        3PZ        -0.05747   0.23578  -0.54066  -0.78424   0.50534
  71 7   H  1S         -0.00423   0.02953  -0.33664   0.64932   0.37740
  72        2S          0.07648   0.09509  -0.36037   0.51702   0.32080
  73        3PX         0.09111  -0.10117  -0.18788   0.22123   0.14075
  74        3PY         0.35484   0.02694  -0.38087   0.58671   0.27032
  75        3PZ         0.05728  -0.23588   0.54097  -0.78516  -0.50487
  76 8   H  1S         -0.18838  -0.05295  -0.25514  -0.00046  -0.14860
  77        2S         -0.14160  -0.20984  -0.15352  -0.00019  -0.01927
  78        3PX        -0.00474   0.51361   0.03403  -0.00026  -0.06590
  79        3PY        -0.36034  -0.33589  -0.33125  -0.00034  -0.08621
  80        3PZ         0.00001  -0.00001  -0.00001  -0.01305   0.00002
                          76        77        78        79        80
                           V         V         V         V         V
     Eigenvalues --     3.61524   3.93394   4.14579   4.34823   4.69493
   1 1   C  1S          0.00406  -0.01499   0.00451  -0.25631  -0.41788
   2        2S          0.00060   0.36776   0.15828   1.47858   2.31803
   3        2PX         0.15993   0.02083   0.00824   0.16500   0.03643
   4        2PY        -0.01885  -0.04560   0.01636   0.06861   0.01889
   5        2PZ         0.00028   0.00003   0.00003  -0.00002  -0.00001
   6        3S          0.01826  -0.82904  -0.47943   0.81425   2.63620
   7        3PX         0.27463  -0.60784   0.05266   0.00362   0.39899
   8        3PY        -0.18479   0.20931  -0.56812  -0.23424   0.15557
   9        3PZ         0.00027  -0.00019  -0.00008   0.00010   0.00006
  10        4XX         0.13329  -0.19331   0.02559  -0.77725  -1.79787
  11        4YY        -0.16801  -0.14774  -0.10057  -1.10698  -1.76106
  12        4ZZ        -0.00345   0.02005  -0.05919  -1.15858  -1.74508
  13        4XY         0.13409   0.08189  -0.10716   0.04473   0.04491
  14        4XZ        -0.00014  -0.00004   0.00000   0.00002  -0.00002
  15        4YZ        -0.00027   0.00009  -0.00008  -0.00001   0.00001
  16 2   C  1S          0.01567  -0.09656   0.00548  -0.37999   0.24821
  17        2S          0.12492   0.61109  -0.25944   2.43521  -1.54984
  18        2PX         0.15062   0.05171  -0.04035  -0.14499   0.02233
  19        2PY        -0.10306   0.17024   0.03338  -0.03511  -0.01605
  20        2PZ        -0.00001   0.00000   0.00000   0.00001  -0.00002
  21        3S         -0.55340  -1.69411  -0.56657   0.90875  -0.97447
  22        3PX         0.09347  -1.35019  -1.09217  -0.21403   0.91221
  23        3PY         0.52631  -1.93092   2.36220   0.62760  -0.28718
  24        3PZ        -0.00004   0.00008   0.00004  -0.00003   0.00002
  25        4XX        -0.15542  -0.25872   0.13754  -1.48624   1.26429
  26        4YY         0.27162  -0.31554   0.00429  -1.90105   1.20896
  27        4ZZ         0.08718  -0.31836   0.11899  -1.40690   0.87260
  28        4XY        -0.25494   0.04099  -0.02357   0.05257   0.03045
  29        4XZ         0.00000  -0.00001  -0.00001   0.00002   0.00000
  30        4YZ         0.00003  -0.00001   0.00000   0.00000   0.00000
  31 3   O  1S         -0.19615  -0.09147  -0.51834  -0.01108   0.05145
  32        2S          0.07250   0.05113  -0.51085  -0.14852   0.22564
  33        2PX        -0.23015   0.06162   0.35751  -0.09380   0.01128
  34        2PY        -0.51369   0.13165   0.13485   0.03214  -0.00085
  35        2PZ         0.00001   0.00000  -0.00002   0.00000   0.00000
  36        3S          2.66524   0.46015   5.97245   0.55145  -1.00442
  37        3PX        -0.68147   0.29939  -0.88674  -0.32697   0.29953
  38        3PY        -0.95432   0.58038   1.19136   0.25811  -0.41434
  39        3PZ         0.00006  -0.00003   0.00004   0.00003  -0.00003
  40        4XX        -0.54283  -0.37431  -1.65416   0.16702   0.04337
  41        4YY         0.10047  -0.48955  -1.99640   0.18175  -0.03231
  42        4ZZ        -0.90841  -0.20425  -1.72802  -0.13052   0.28163
  43        4XY         0.98309  -0.28896  -0.51809  -0.17639   0.16125
  44        4XZ        -0.00004   0.00002   0.00000  -0.00002   0.00001
  45        4YZ        -0.00005   0.00002   0.00003   0.00001  -0.00001
  46 4   N  1S         -0.05728  -0.45740   0.14832   0.09685  -0.01411
  47        2S          0.20081   0.89414  -0.08817  -0.10522   0.07679
  48        2PX         0.02954   0.04103  -0.03256  -0.10879   0.03532
  49        2PY         0.02937   0.12782  -0.09094  -0.26917   0.14618
  50        2PZ         0.00000   0.00000   0.00000   0.00001   0.00000
  51        3S          0.05525   4.63064  -2.14388  -1.10483   0.12383
  52        3PX         0.09790  -0.33252   0.57671   0.17226  -0.12309
  53        3PY        -0.01699  -1.40971   0.56890   0.16406   0.14379
  54        3PZ        -0.00001   0.00003  -0.00004   0.00000  -0.00001
  55        4XX        -0.25911  -1.47762   0.37070   0.30562  -0.05331
  56        4YY        -0.12760  -1.27659   0.42733   0.57570  -0.30305
  57        4ZZ        -0.19723  -1.47096   0.52142   0.27835   0.01513
  58        4XY        -0.14480   0.06106  -0.09524   0.09998  -0.03911
  59        4XZ         0.00002   0.00000   0.00001   0.00000   0.00000
  60        4YZ         0.00001  -0.00001   0.00000  -0.00001   0.00001
  61 5   H  1S          0.15167   0.09935   0.05904   0.15519   0.18564
  62        2S          0.17898  -0.22723   0.19547  -0.09587  -0.31573
  63        3PX         0.12909   0.05602  -0.03730   0.07254   0.16384
  64        3PY        -0.14486  -0.01896  -0.00196  -0.13012  -0.25063
  65        3PZ         0.00010   0.00002   0.00006   0.00006   0.00012
  66 6   H  1S         -0.00867   0.00955   0.02734   0.17300   0.15831
  67        2S          0.09542   0.00273   0.02470  -0.26197  -0.30277
  68        3PX         0.05300  -0.01761   0.07174   0.01028   0.03491
  69        3PY         0.03220  -0.06824   0.07052   0.11853   0.14286
  70        3PZ         0.04435  -0.02224   0.01486   0.13575   0.22530
  71 7   H  1S         -0.00906   0.00957   0.02730   0.17302   0.15830
  72        2S          0.09506   0.00286   0.02491  -0.26204  -0.30284
  73        3PX         0.05282  -0.01755   0.07169   0.01029   0.03496
  74        3PY         0.03186  -0.06816   0.07048   0.11839   0.14266
  75        3PZ        -0.04390   0.02229  -0.01484  -0.13585  -0.22540
  76 8   H  1S         -1.44275   0.50724   0.66560  -0.11934   0.05886
  77        2S         -0.84874   0.02019  -0.19928  -0.03859  -0.05119
  78        3PX        -0.69741   0.29151   0.45706   0.03755  -0.00684
  79        3PY        -1.10180   0.24485   0.52030  -0.14009   0.02421
  80        3PZ         0.00005  -0.00002  -0.00003  -0.00001   0.00000
     Alpha Density Matrix:
                           1         2         3         4         5
   1 1   C  1S          1.02850
   2        2S         -0.03585   0.14602
   3        2PX        -0.00277   0.00698   0.19278
   4        2PY        -0.00199   0.00626   0.00278   0.18977
   5        2PZ         0.00000   0.00000   0.00000   0.00000   0.18623
   6        3S         -0.10178   0.15619   0.04684   0.02027  -0.00001
   7        3PX        -0.00468   0.00746   0.10355   0.00145   0.00000
   8        3PY        -0.00182   0.00530   0.00768   0.09718  -0.00001
   9        3PZ         0.00000   0.00000  -0.00001  -0.00001   0.08987
  10        4XX        -0.00502   0.00113   0.00690   0.00469   0.00000
  11        4YY        -0.00400  -0.00031  -0.00377   0.00043  -0.00001
  12        4ZZ        -0.00423   0.00005  -0.00132  -0.00533   0.00001
  13        4XY         0.00035  -0.00104   0.00254  -0.00543   0.00000
  14        4XZ         0.00000   0.00000   0.00000   0.00000  -0.00285
  15        4YZ         0.00000   0.00000   0.00000  -0.00001  -0.00776
  16 2   C  1S          0.00604  -0.01288  -0.03465  -0.00875   0.00000
  17        2S         -0.01177   0.02335   0.07137   0.01911   0.00000
  18        2PX         0.02858  -0.05561  -0.13318  -0.03534   0.00000
  19        2PY         0.01049  -0.01978  -0.04831  -0.00402   0.00000
  20        2PZ         0.00000   0.00000   0.00000   0.00000   0.01901
  21        3S         -0.00146   0.01277   0.07126   0.01879   0.00000
  22        3PX        -0.00675   0.00610  -0.01198   0.00111   0.00000
  23        3PY         0.00611  -0.01286  -0.02508  -0.01816   0.00000
  24        3PZ         0.00000   0.00000   0.00000   0.00000  -0.00184
  25        4XX        -0.00451   0.00737   0.00635   0.00417   0.00000
  26        4YY         0.00127  -0.00328  -0.00455  -0.00326   0.00000
  27        4ZZ         0.00007  -0.00051  -0.00029  -0.00025   0.00000
  28        4XY        -0.00253   0.00473   0.00828  -0.00288   0.00000
  29        4XZ         0.00000   0.00000   0.00000   0.00000  -0.00561
  30        4YZ         0.00000   0.00000   0.00000   0.00000  -0.00219
  31 3   O  1S         -0.00170   0.00289   0.00588  -0.00041   0.00000
  32        2S          0.00353  -0.00680  -0.01643   0.00348   0.00000
  33        2PX        -0.01366   0.03001   0.04957  -0.00123   0.00000
  34        2PY         0.00461  -0.00819  -0.02186  -0.00800   0.00000
  35        2PZ         0.00000   0.00000   0.00000   0.00000  -0.01606
  36        3S          0.01027  -0.01651  -0.03351  -0.01126   0.00000
  37        3PX        -0.01312   0.02775   0.04904   0.00328   0.00000
  38        3PY         0.00605  -0.01001  -0.02334  -0.00900   0.00000
  39        3PZ         0.00000   0.00000   0.00000   0.00000  -0.01265
  40        4XX        -0.00013  -0.00018   0.00106   0.00044   0.00000
  41        4YY        -0.00001  -0.00017  -0.00191   0.00050   0.00000
  42        4ZZ        -0.00045   0.00023  -0.00041   0.00070   0.00000
  43        4XY        -0.00007  -0.00013  -0.00146   0.00004   0.00000
  44        4XZ         0.00000   0.00000   0.00000   0.00000  -0.00033
  45        4YZ         0.00000   0.00000   0.00000   0.00000  -0.00001
  46 4   N  1S         -0.00160   0.00348   0.00451   0.00481   0.00000
  47        2S          0.00359  -0.00872  -0.01207  -0.01287   0.00000
  48        2PX        -0.01547   0.03101   0.03939   0.02273   0.00000
  49        2PY        -0.00441   0.00748   0.02285   0.00270   0.00000
  50        2PZ         0.00000   0.00000   0.00000   0.00000  -0.01258
  51        3S          0.00178  -0.00410  -0.00792  -0.00916   0.00000
  52        3PX        -0.01487   0.03041   0.04421   0.02463   0.00000
  53        3PY        -0.00272   0.00344   0.01716  -0.00011   0.00000
  54        3PZ         0.00000   0.00000   0.00000   0.00000  -0.01288
  55        4XX        -0.00020   0.00023   0.00075   0.00060   0.00000
  56        4YY         0.00064  -0.00105  -0.00257  -0.00040   0.00000
  57        4ZZ        -0.00021  -0.00004  -0.00006  -0.00055   0.00000
  58        4XY         0.00017  -0.00037   0.00096   0.00020   0.00000
  59        4XZ         0.00000   0.00000   0.00000   0.00000  -0.00039
  60        4YZ         0.00000   0.00000   0.00000   0.00000   0.00012
  61 5   H  1S         -0.02834   0.05351  -0.07121   0.10831  -0.00005
  62        2S         -0.00448   0.01423  -0.06408   0.08675  -0.00004
  63        3PX        -0.00145   0.00235   0.00157   0.00340   0.00000
  64        3PY         0.00219  -0.00330   0.00385  -0.00055   0.00000
  65        3PZ         0.00000   0.00000   0.00000   0.00000   0.00495
  66 6   H  1S         -0.02559   0.04645  -0.02871  -0.07206  -0.10436
  67        2S         -0.00090   0.00645  -0.03213  -0.06589  -0.09377
  68        3PX        -0.00065   0.00122   0.00430  -0.00079  -0.00152
  69        3PY        -0.00159   0.00254  -0.00085   0.00235  -0.00356
  70        3PZ        -0.00212   0.00321  -0.00165  -0.00372  -0.00039
  71 7   H  1S         -0.02559   0.04645  -0.02873  -0.07197   0.10441
  72        2S         -0.00090   0.00646  -0.03214  -0.06580   0.09382
  73        3PX        -0.00065   0.00122   0.00430  -0.00079   0.00152
  74        3PY        -0.00159   0.00254  -0.00085   0.00235   0.00356
  75        3PZ         0.00213  -0.00321   0.00165   0.00372  -0.00040
  76 8   H  1S          0.00210  -0.00530  -0.00958   0.00155   0.00000
  77        2S          0.00028  -0.00010  -0.00119   0.00013   0.00000
  78        3PX        -0.00001   0.00002   0.00034   0.00111   0.00000
  79        3PY         0.00045  -0.00081  -0.00088   0.00010   0.00000
  80        3PZ         0.00000   0.00000   0.00000   0.00000  -0.00014
                           6         7         8         9        10
   6        3S          0.22656
   7        3PX         0.04361   0.06338
   8        3PY         0.01928   0.00419   0.05242
   9        3PZ        -0.00002  -0.00001   0.00000   0.04572
  10        4XX         0.00181   0.00321   0.00230   0.00000   0.00049
  11        4YY        -0.00120  -0.00216   0.00015   0.00000  -0.00012
  12        4ZZ         0.00028  -0.00060  -0.00259   0.00000  -0.00018
  13        4XY        -0.00302   0.00051  -0.00258   0.00000  -0.00004
  14        4XZ         0.00000   0.00000   0.00000  -0.00105   0.00000
  15        4YZ         0.00000   0.00000   0.00000  -0.00347   0.00000
  16 2   C  1S          0.00484  -0.00385  -0.00307   0.00000  -0.00376
  17        2S         -0.00199   0.01285   0.00990  -0.00001   0.00609
  18        2PX        -0.07529  -0.07687  -0.02065   0.00000  -0.00471
  19        2PY        -0.04551  -0.04233   0.00658   0.00000  -0.00316
  20        2PZ         0.00000   0.00000   0.00001   0.01783   0.00000
  21        3S          0.00726   0.01982   0.01398  -0.00001   0.00461
  22        3PX         0.03957   0.00234   0.00507  -0.00001  -0.00117
  23        3PY        -0.03277  -0.01538  -0.01099   0.00001  -0.00152
  24        3PZ         0.00000   0.00000   0.00001   0.00568   0.00000
  25        4XX         0.01350   0.00458   0.00323   0.00000   0.00027
  26        4YY        -0.00844  -0.00254  -0.00342   0.00000  -0.00004
  27        4ZZ         0.00047   0.00014   0.00021   0.00000  -0.00014
  28        4XY         0.01288   0.00569  -0.00012   0.00000   0.00003
  29        4XZ         0.00000   0.00000   0.00000  -0.00301   0.00000
  30        4YZ         0.00000   0.00000   0.00000   0.00052   0.00000
  31 3   O  1S          0.00797   0.00285   0.00034   0.00000  -0.00025
  32        2S         -0.01962  -0.00846   0.00002   0.00000   0.00038
  33        2PX         0.08141   0.03655   0.02351  -0.00001  -0.00219
  34        2PY        -0.04032  -0.01959  -0.00876   0.00000   0.00161
  35        2PZ         0.00001   0.00000  -0.00003  -0.03260   0.00000
  36        3S         -0.05502  -0.01714  -0.00843   0.00001  -0.00126
  37        3PX         0.07444   0.03385   0.02035  -0.00001  -0.00089
  38        3PY        -0.03850  -0.01810  -0.00931   0.00000   0.00055
  39        3PZ         0.00001   0.00000  -0.00003  -0.02665   0.00000
  40        4XX        -0.00175   0.00026  -0.00112   0.00000   0.00030
  41        4YY         0.00048  -0.00159   0.00063   0.00000  -0.00003
  42        4ZZ         0.00064  -0.00018   0.00050   0.00000  -0.00001
  43        4XY         0.00138  -0.00015   0.00016   0.00000  -0.00020
  44        4XZ         0.00000   0.00000   0.00000   0.00067   0.00000
  45        4YZ         0.00000   0.00000   0.00000   0.00037   0.00000
  46 4   N  1S          0.00206  -0.00231   0.00484   0.00000   0.00015
  47        2S         -0.00626   0.00337  -0.01237   0.00001  -0.00043
  48        2PX         0.14711   0.04855   0.02235  -0.00002   0.00068
  49        2PY         0.01994   0.04045  -0.00994   0.00001   0.00022
  50        2PZ         0.00000   0.00000   0.00002   0.00944   0.00000
  51        3S          0.01927   0.02313  -0.01591   0.00001  -0.00049
  52        3PX         0.13444   0.04630   0.02312  -0.00002   0.00109
  53        3PY         0.00713   0.02910  -0.00896   0.00001   0.00025
  54        3PZ         0.00000   0.00000   0.00002   0.00725   0.00000
  55        4XX        -0.00198  -0.00034   0.00035   0.00000   0.00003
  56        4YY        -0.00307  -0.00396   0.00057   0.00000   0.00000
  57        4ZZ        -0.00027  -0.00013  -0.00026   0.00000  -0.00002
  58        4XY        -0.00486  -0.00099  -0.00007   0.00000   0.00009
  59        4XZ         0.00000   0.00000   0.00000  -0.00053   0.00000
  60        4YZ         0.00000   0.00000   0.00000  -0.00078   0.00000
  61 5   H  1S          0.05334  -0.03541   0.05300  -0.00003   0.00053
  62        2S          0.00221  -0.03152   0.03810  -0.00002   0.00031
  63        3PX         0.00244   0.00082   0.00174   0.00000   0.00015
  64        3PY        -0.00308   0.00192  -0.00021   0.00000   0.00010
  65        3PZ         0.00000   0.00000   0.00000   0.00238   0.00000
  66 6   H  1S          0.03672  -0.01501  -0.03697  -0.04913  -0.00246
  67        2S         -0.01675  -0.02074  -0.03513  -0.04082  -0.00256
  68        3PX         0.00249   0.00242  -0.00023  -0.00072   0.00014
  69        3PY         0.00283  -0.00032   0.00118  -0.00171   0.00004
  70        3PZ         0.00268  -0.00084  -0.00193  -0.00017  -0.00012
  71 7   H  1S          0.03673  -0.01502  -0.03693   0.04916  -0.00246
  72        2S         -0.01672  -0.02073  -0.03510   0.04085  -0.00256
  73        3PX         0.00249   0.00242  -0.00023   0.00072   0.00014
  74        3PY         0.00283  -0.00032   0.00119   0.00171   0.00004
  75        3PZ        -0.00268   0.00084   0.00193  -0.00017   0.00012
  76 8   H  1S         -0.00335  -0.00423  -0.00335   0.00000  -0.00026
  77        2S          0.01415   0.00026   0.00120   0.00000  -0.00033
  78        3PX         0.00103   0.00041   0.00093   0.00000  -0.00006
  79        3PY        -0.00194  -0.00043  -0.00065   0.00000   0.00006
  80        3PZ         0.00000   0.00000   0.00000  -0.00089   0.00000
                          11        12        13        14        15
  11        4YY         0.00011
  12        4ZZ         0.00003   0.00019
  13        4XY        -0.00001   0.00013   0.00040
  14        4XZ         0.00000   0.00000   0.00000   0.00026
  15        4YZ         0.00000   0.00000   0.00000   0.00022   0.00038
  16 2   C  1S          0.00036   0.00030  -0.00105   0.00000   0.00000
  17        2S         -0.00127  -0.00122   0.00211   0.00000   0.00000
  18        2PX         0.00197   0.00208  -0.00172   0.00000   0.00000
  19        2PY         0.00238   0.00081   0.00406   0.00000   0.00000
  20        2PZ         0.00000   0.00000   0.00000   0.00578   0.00213
  21        3S         -0.00133  -0.00095   0.00165   0.00000   0.00000
  22        3PX        -0.00010   0.00059  -0.00175   0.00000   0.00000
  23        3PY         0.00080   0.00053   0.00132   0.00000   0.00000
  24        3PZ         0.00000   0.00000   0.00000   0.00411   0.00209
  25        4XX        -0.00015  -0.00005  -0.00024   0.00000   0.00000
  26        4YY         0.00009   0.00001   0.00005   0.00000   0.00000
  27        4ZZ         0.00002   0.00003   0.00003   0.00000   0.00000
  28        4XY        -0.00017   0.00012   0.00003   0.00000   0.00000
  29        4XZ         0.00000   0.00000   0.00000   0.00019   0.00026
  30        4YZ         0.00000   0.00000   0.00000   0.00026   0.00028
  31 3   O  1S         -0.00029  -0.00017   0.00002   0.00000   0.00000
  32        2S          0.00065   0.00030  -0.00014   0.00000   0.00000
  33        2PX         0.00010   0.00146   0.00330   0.00000   0.00000
  34        2PY        -0.00053   0.00024  -0.00067   0.00000   0.00000
  35        2PZ         0.00000   0.00000   0.00000   0.00142  -0.00045
  36        3S          0.00150   0.00069   0.00195   0.00000   0.00000
  37        3PX        -0.00029   0.00097   0.00199   0.00000   0.00000
  38        3PY        -0.00002   0.00017  -0.00015   0.00000   0.00000
  39        3PZ         0.00000   0.00000   0.00000   0.00047  -0.00067
  40        4XX        -0.00010  -0.00012  -0.00022   0.00000   0.00000
  41        4YY         0.00004   0.00003  -0.00004   0.00000   0.00000
  42        4ZZ         0.00001   0.00000  -0.00003   0.00000   0.00000
  43        4XY         0.00006   0.00001  -0.00002   0.00000   0.00000
  44        4XZ         0.00000   0.00000   0.00000  -0.00013   0.00001
  45        4YZ         0.00000   0.00000   0.00000   0.00016   0.00009
  46 4   N  1S         -0.00030  -0.00021  -0.00031   0.00000   0.00000
  47        2S          0.00053   0.00035   0.00059   0.00000   0.00000
  48        2PX        -0.00222   0.00044  -0.00633   0.00000   0.00000
  49        2PY        -0.00093  -0.00083  -0.00227   0.00000   0.00000
  50        2PZ         0.00000   0.00000   0.00000   0.00579   0.00369
  51        3S          0.00008   0.00008  -0.00144   0.00000   0.00000
  52        3PX        -0.00205   0.00025  -0.00534   0.00000   0.00000
  53        3PY        -0.00056  -0.00058  -0.00110   0.00000   0.00000
  54        3PZ         0.00000   0.00000   0.00000   0.00458   0.00310
  55        4XX         0.00003  -0.00004   0.00015   0.00000   0.00000
  56        4YY         0.00007   0.00007   0.00017   0.00000   0.00000
  57        4ZZ         0.00000   0.00001   0.00001   0.00000   0.00000
  58        4XY         0.00007  -0.00006   0.00033   0.00000   0.00000
  59        4XZ         0.00000   0.00000   0.00000  -0.00011  -0.00005
  60        4YZ         0.00000   0.00000   0.00000  -0.00038  -0.00021
  61 5   H  1S          0.00154  -0.00244  -0.00486   0.00000   0.00000
  62        2S          0.00131  -0.00228  -0.00394   0.00000   0.00000
  63        3PX        -0.00001  -0.00011  -0.00005   0.00000   0.00000
  64        3PY        -0.00007  -0.00002   0.00011   0.00000   0.00000
  65        3PZ         0.00000   0.00000   0.00000  -0.00008  -0.00021
  66 6   H  1S          0.00045   0.00235   0.00161   0.00215   0.00465
  67        2S          0.00067   0.00195   0.00225   0.00277   0.00472
  68        3PX        -0.00009   0.00000   0.00005  -0.00001   0.00005
  69        3PY         0.00002  -0.00005  -0.00011   0.00005   0.00015
  70        3PZ         0.00003   0.00012   0.00008   0.00001   0.00002
  71 7   H  1S          0.00044   0.00235   0.00161  -0.00215  -0.00465
  72        2S          0.00066   0.00196   0.00224  -0.00277  -0.00471
  73        3PX        -0.00009   0.00000   0.00005   0.00001  -0.00005
  74        3PY         0.00002  -0.00005  -0.00011  -0.00005  -0.00015
  75        3PZ        -0.00003  -0.00012  -0.00008   0.00001   0.00002
  76 8   H  1S          0.00038  -0.00027  -0.00075   0.00000   0.00000
  77        2S         -0.00002   0.00008  -0.00064   0.00000   0.00000
  78        3PX         0.00005   0.00000   0.00004   0.00000   0.00000
  79        3PY         0.00001  -0.00004  -0.00009   0.00000   0.00000
  80        3PZ         0.00000   0.00000   0.00000   0.00003  -0.00004
                          16        17        18        19        20
  16 2   C  1S          1.02720
  17        2S         -0.04091   0.16506
  18        2PX         0.00226  -0.00472   0.17617
  19        2PY        -0.00959   0.01929   0.02517   0.18612
  20        2PZ         0.00000   0.00000   0.00000   0.00000   0.17426
  21        3S         -0.06585   0.11489  -0.01466   0.01731   0.00001
  22        3PX         0.01466  -0.02154   0.02675  -0.00350   0.00000
  23        3PY         0.00743  -0.01646   0.00680   0.02410   0.00000
  24        3PZ         0.00000   0.00000   0.00000   0.00000   0.11552
  25        4XX        -0.00519   0.00067  -0.00479  -0.00510   0.00000
  26        4YY        -0.00435  -0.00005   0.00300  -0.00209   0.00000
  27        4ZZ        -0.00336  -0.00382  -0.00159   0.00210   0.00000
  28        4XY        -0.00062   0.00082  -0.00494   0.00527   0.00000
  29        4XZ         0.00000   0.00000   0.00000   0.00000   0.00263
  30        4YZ         0.00000   0.00000   0.00000   0.00000   0.00598
  31 3   O  1S          0.00272  -0.00170  -0.01057   0.01343   0.00000
  32        2S         -0.00560   0.00451   0.02752  -0.03230   0.00000
  33        2PX         0.02330  -0.04799  -0.06219   0.08328   0.00000
  34        2PY        -0.02779   0.05497   0.07571  -0.09399   0.00000
  35        2PZ         0.00000   0.00000   0.00000   0.00000   0.03762
  36        3S          0.00932  -0.03219   0.00707  -0.01790   0.00000
  37        3PX         0.01204  -0.02325  -0.04597   0.05248   0.00000
  38        3PY        -0.01526   0.02613   0.04578  -0.05184   0.00000
  39        3PZ         0.00000   0.00000   0.00000   0.00000   0.01120
  40        4XX        -0.00231   0.00420   0.00087  -0.00770   0.00000
  41        4YY        -0.00197   0.00292   0.00437   0.00392   0.00000
  42        4ZZ         0.00067  -0.00014   0.00046   0.00026   0.00000
  43        4XY         0.00320  -0.00474  -0.00202   0.00463   0.00000
  44        4XZ         0.00000   0.00000   0.00000   0.00000  -0.00413
  45        4YZ         0.00000   0.00000   0.00000   0.00000   0.00443
  46 4   N  1S          0.00553  -0.00677  -0.00918  -0.02274   0.00000
  47        2S         -0.01208   0.01464   0.02103   0.04969   0.00000
  48        2PX         0.01066  -0.02352   0.03476  -0.07754   0.00000
  49        2PY         0.04744  -0.10234  -0.07655  -0.13285   0.00001
  50        2PZ         0.00000   0.00000   0.00000   0.00000   0.15587
  51        3S          0.00844  -0.02822   0.00507  -0.00223   0.00000
  52        3PX         0.00237  -0.00834   0.02557  -0.05856   0.00000
  53        3PY         0.03036  -0.06745  -0.05610  -0.08645   0.00000
  54        3PZ         0.00000   0.00000   0.00000   0.00000   0.12150
  55        4XX         0.00005  -0.00002  -0.00330   0.00097   0.00000
  56        4YY        -0.00462   0.00883   0.00746   0.00856   0.00000
  57        4ZZ         0.00037  -0.00070  -0.00023  -0.00103   0.00000
  58        4XY        -0.00149   0.00326  -0.00374   0.00535   0.00000
  59        4XZ         0.00000   0.00000   0.00000   0.00000  -0.00338
  60        4YZ         0.00000   0.00000   0.00000   0.00000  -0.01063
  61 5   H  1S          0.00446  -0.01038   0.01459  -0.00134   0.00000
  62        2S          0.00879  -0.01936   0.01733  -0.01433   0.00000
  63        3PX        -0.00054   0.00112  -0.00320  -0.00031   0.00000
  64        3PY        -0.00050   0.00094  -0.00159  -0.00025   0.00000
  65        3PZ         0.00000   0.00000   0.00000   0.00000   0.00035
  66 6   H  1S          0.00354  -0.00915   0.01313   0.00761   0.00503
  67        2S          0.00517  -0.01011   0.02184   0.02030   0.02783
  68        3PX        -0.00069   0.00152  -0.00293  -0.00153  -0.00100
  69        3PY        -0.00002   0.00007  -0.00067  -0.00059  -0.00039
  70        3PZ         0.00025  -0.00044   0.00043   0.00022   0.00001
  71 7   H  1S          0.00354  -0.00915   0.01313   0.00760  -0.00503
  72        2S          0.00517  -0.01011   0.02184   0.02028  -0.02783
  73        3PX        -0.00069   0.00152  -0.00293  -0.00153   0.00100
  74        3PY        -0.00002   0.00007  -0.00067  -0.00059   0.00039
  75        3PZ        -0.00025   0.00044  -0.00043  -0.00022   0.00001
  76 8   H  1S          0.00422  -0.00919  -0.00462   0.01937   0.00000
  77        2S          0.00087  -0.00073   0.00595   0.02003   0.00000
  78        3PX         0.00063  -0.00183  -0.00189   0.00352   0.00000
  79        3PY         0.00006   0.00003   0.00049  -0.00274   0.00000
  80        3PZ         0.00000   0.00000   0.00000   0.00000   0.00095
                          21        22        23        24        25
  21        3S          0.09314
  22        3PX        -0.00893   0.03022
  23        3PY        -0.01830  -0.01149   0.01611
  24        3PZ         0.00001   0.00000   0.00000   0.07801
  25        4XX         0.00252   0.00320  -0.00294   0.00000   0.00126
  26        4YY        -0.00362  -0.00332   0.00248   0.00000  -0.00094
  27        4ZZ        -0.00163   0.00053   0.00020   0.00000   0.00003
  28        4XY         0.00289   0.00501  -0.00318   0.00000   0.00065
  29        4XZ         0.00000   0.00000   0.00000   0.00202   0.00000
  30        4YZ         0.00000   0.00000   0.00000   0.00469   0.00000
  31 3   O  1S          0.00886   0.00581  -0.00943   0.00000  -0.00053
  32        2S         -0.02100  -0.01400   0.01992   0.00000   0.00117
  33        2PX        -0.00323   0.02623   0.00970   0.00000   0.01103
  34        2PY         0.03656  -0.00781  -0.00430   0.00000   0.00260
  35        2PZ         0.00000   0.00000   0.00001   0.01593   0.00000
  36        3S         -0.05181  -0.03523   0.04470   0.00000  -0.00059
  37        3PX         0.00761   0.02424   0.00054   0.00000   0.00937
  38        3PY         0.01303  -0.01105   0.00302   0.00000  -0.00011
  39        3PZ         0.00000   0.00000   0.00001   0.00016   0.00000
  40        4XX         0.00156  -0.00130  -0.00159   0.00000  -0.00039
  41        4YY         0.00232   0.00152  -0.00066   0.00000   0.00003
  42        4ZZ         0.00026   0.00050  -0.00025   0.00000   0.00009
  43        4XY        -0.00328   0.00091   0.00035   0.00000  -0.00022
  44        4XZ         0.00000   0.00000   0.00000  -0.00234   0.00000
  45        4YZ         0.00000   0.00000   0.00000   0.00304   0.00000
  46 4   N  1S          0.00973  -0.00294  -0.00306   0.00000   0.00139
  47        2S         -0.01560   0.00696   0.01246   0.00000  -0.00335
  48        2PX         0.00378   0.08524  -0.05421   0.00001   0.01221
  49        2PY        -0.08788  -0.01321   0.00895   0.00000   0.00118
  50        2PZ         0.00001   0.00000  -0.00001   0.10865   0.00000
  51        3S         -0.05686   0.01613   0.01044   0.00000  -0.00263
  52        3PX         0.01319   0.07513  -0.04934   0.00001   0.01116
  53        3PY        -0.06242  -0.01338   0.01071   0.00000   0.00025
  54        3PZ         0.00001   0.00000  -0.00001   0.08548   0.00000
  55        4XX         0.00037  -0.00219   0.00089   0.00000  -0.00010
  56        4YY         0.00747   0.00054  -0.00072   0.00000  -0.00011
  57        4ZZ        -0.00025  -0.00024  -0.00001   0.00000   0.00001
  58        4XY         0.00197  -0.00376   0.00188   0.00000  -0.00041
  59        4XZ         0.00000   0.00000   0.00000  -0.00231   0.00000
  60        4YZ         0.00000   0.00000   0.00000  -0.00726   0.00000
  61 5   H  1S         -0.01470   0.00974  -0.00735   0.00001   0.00271
  62        2S         -0.02501  -0.00141   0.00023   0.00000  -0.00055
  63        3PX         0.00081  -0.00057  -0.00030   0.00000   0.00017
  64        3PY         0.00114  -0.00062  -0.00002   0.00000  -0.00007
  65        3PZ         0.00000   0.00000   0.00000  -0.00015   0.00000
  66 6   H  1S         -0.01311   0.00165   0.00801   0.01173  -0.00024
  67        2S         -0.01399  -0.00805   0.01521   0.02704  -0.00300
  68        3PX         0.00152   0.00007  -0.00075  -0.00053   0.00020
  69        3PY        -0.00009   0.00024  -0.00035   0.00002   0.00016
  70        3PZ        -0.00074   0.00007   0.00039   0.00005   0.00001
  71 7   H  1S         -0.01311   0.00165   0.00801  -0.01174  -0.00023
  72        2S         -0.01399  -0.00803   0.01520  -0.02705  -0.00299
  73        3PX         0.00153   0.00007  -0.00075   0.00053   0.00020
  74        3PY        -0.00009   0.00024  -0.00035  -0.00002   0.00016
  75        3PZ         0.00074  -0.00007  -0.00039   0.00005  -0.00001
  76 8   H  1S         -0.01884  -0.00218   0.00179   0.00000  -0.00393
  77        2S          0.00119   0.01174  -0.00725   0.00000  -0.00063
  78        3PX        -0.00149   0.00011   0.00077   0.00000   0.00004
  79        3PY        -0.00177  -0.00125   0.00058   0.00000  -0.00029
  80        3PZ         0.00000   0.00000   0.00000   0.00030   0.00000
                          26        27        28        29        30
  26        4YY         0.00148
  27        4ZZ        -0.00025   0.00022
  28        4XY        -0.00086   0.00026   0.00240
  29        4XZ         0.00000   0.00000   0.00000   0.00034
  30        4YZ         0.00000   0.00000   0.00000  -0.00012   0.00108
  31 3   O  1S         -0.00245   0.00119   0.00499   0.00000   0.00000
  32        2S          0.00547  -0.00282  -0.01141   0.00000   0.00000
  33        2PX        -0.01383   0.00315   0.00614   0.00000   0.00000
  34        2PY         0.00081  -0.00428  -0.01415   0.00000   0.00000
  35        2PZ         0.00000   0.00000   0.00000   0.00767  -0.01612
  36        3S          0.00736  -0.00235  -0.01833   0.00000   0.00000
  37        3PX        -0.01095   0.00205   0.00599   0.00000   0.00000
  38        3PY         0.00214  -0.00248  -0.00982   0.00000   0.00000
  39        3PZ         0.00000   0.00000   0.00000   0.00571  -0.01340
  40        4XX         0.00070  -0.00022  -0.00014   0.00000   0.00000
  41        4YY        -0.00018  -0.00002   0.00035   0.00000   0.00000
  42        4ZZ        -0.00015   0.00001   0.00004   0.00000   0.00000
  43        4XY        -0.00003   0.00025   0.00067   0.00000   0.00000
  44        4XZ         0.00000   0.00000   0.00000  -0.00032   0.00054
  45        4YZ         0.00000   0.00000   0.00000   0.00005   0.00026
  46 4   N  1S         -0.00517   0.00109  -0.00261   0.00000   0.00000
  47        2S          0.00885  -0.00230   0.00465   0.00000   0.00000
  48        2PX        -0.00931   0.00037   0.01686   0.00000   0.00000
  49        2PY         0.00671  -0.00027  -0.00708   0.00000   0.00000
  50        2PZ         0.00000   0.00000   0.00000   0.00146   0.01084
  51        3S          0.01288  -0.00285   0.00562   0.00000   0.00000
  52        3PX        -0.00870   0.00025   0.01597   0.00000   0.00000
  53        3PY         0.00610  -0.00062  -0.00564   0.00000   0.00000
  54        3PZ         0.00000   0.00000   0.00000   0.00091   0.00940
  55        4XX        -0.00009   0.00008  -0.00041   0.00000   0.00000
  56        4YY        -0.00051  -0.00003   0.00021   0.00000   0.00000
  57        4ZZ        -0.00007   0.00004  -0.00011   0.00000   0.00000
  58        4XY         0.00020   0.00001  -0.00044   0.00000   0.00000
  59        4XZ         0.00000   0.00000   0.00000  -0.00001  -0.00023
  60        4YZ         0.00000   0.00000   0.00000  -0.00013  -0.00058
  61 5   H  1S         -0.00092  -0.00036  -0.00301   0.00000   0.00000
  62        2S          0.00243  -0.00060  -0.00569   0.00000   0.00000
  63        3PX        -0.00007  -0.00001  -0.00002   0.00000   0.00000
  64        3PY         0.00001   0.00001   0.00003   0.00000   0.00000
  65        3PZ         0.00000   0.00000   0.00000  -0.00015  -0.00007
  66 6   H  1S          0.00084   0.00002   0.00126   0.00333   0.00208
  67        2S          0.00224   0.00009  -0.00164   0.00290   0.00413
  68        3PX        -0.00013  -0.00001   0.00029   0.00002   0.00002
  69        3PY        -0.00006  -0.00001  -0.00001   0.00011   0.00005
  70        3PZ         0.00004   0.00000   0.00007   0.00001   0.00002
  71 7   H  1S          0.00084   0.00002   0.00126  -0.00333  -0.00208
  72        2S          0.00224   0.00009  -0.00164  -0.00291  -0.00413
  73        3PX        -0.00013  -0.00001   0.00029  -0.00002  -0.00002
  74        3PY        -0.00006  -0.00001  -0.00001  -0.00011  -0.00005
  75        3PZ        -0.00004   0.00000  -0.00007   0.00001   0.00002
  76 8   H  1S          0.00432   0.00058   0.00373   0.00000   0.00000
  77        2S         -0.00062   0.00079   0.00557   0.00000   0.00000
  78        3PX        -0.00004   0.00009   0.00017   0.00000   0.00000
  79        3PY         0.00061  -0.00012  -0.00035   0.00000   0.00000
  80        3PZ         0.00000   0.00000   0.00000   0.00023  -0.00054
                          31        32        33        34        35
  31 3   O  1S          1.03966
  32        2S         -0.09175   0.26060
  33        2PX        -0.01801   0.03374   0.33357
  34        2PY        -0.00425   0.01163  -0.00035   0.27036
  35        2PZ         0.00000   0.00000   0.00001   0.00000   0.38637
  36        3S         -0.12508   0.29096   0.10025   0.04254   0.00000
  37        3PX        -0.01563   0.03249   0.23985  -0.00502   0.00000
  38        3PY        -0.00664   0.01637  -0.01544   0.14968   0.00000
  39        3PZ         0.00000   0.00000   0.00000   0.00000   0.30083
  40        4XX        -0.00415  -0.00316  -0.01934   0.00067   0.00000
  41        4YY        -0.00566   0.00044  -0.00054  -0.00204   0.00000
  42        4ZZ        -0.00483  -0.00183   0.00156   0.00148   0.00000
  43        4XY         0.00160  -0.00308  -0.00079  -0.01243   0.00000
  44        4XZ         0.00000   0.00000   0.00000   0.00000  -0.01542
  45        4YZ         0.00000   0.00000   0.00000   0.00000  -0.00114
  46 4   N  1S         -0.00102   0.00218   0.00207   0.00535   0.00000
  47        2S          0.00180  -0.00461  -0.00433  -0.01202   0.00000
  48        2PX         0.01356  -0.02867   0.02113  -0.02860   0.00000
  49        2PY        -0.01192   0.02638  -0.00919   0.03979   0.00000
  50        2PZ         0.00000   0.00000   0.00000   0.00000  -0.06982
  51        3S          0.00323  -0.00617  -0.02493  -0.01230  -0.00001
  52        3PX         0.01169  -0.02495   0.02507  -0.03264   0.00000
  53        3PY        -0.01053   0.02265   0.00141   0.03720   0.00000
  54        3PZ         0.00000   0.00000   0.00000   0.00000  -0.07326
  55        4XX        -0.00030   0.00054   0.00186   0.00000   0.00000
  56        4YY         0.00028  -0.00066  -0.00077   0.00038   0.00000
  57        4ZZ        -0.00018   0.00035  -0.00028   0.00021   0.00000
  58        4XY         0.00011  -0.00030   0.00098  -0.00071   0.00000
  59        4XZ         0.00000   0.00000   0.00000   0.00000   0.00171
  60        4YZ         0.00000   0.00000   0.00000   0.00000   0.00177
  61 5   H  1S         -0.00090   0.00481  -0.02040   0.00375   0.00000
  62        2S         -0.00216   0.00747  -0.04797   0.01473   0.00002
  63        3PX         0.00000   0.00000   0.00111  -0.00035   0.00000
  64        3PY        -0.00006   0.00001   0.00062  -0.00018   0.00000
  65        3PZ         0.00000   0.00000   0.00000   0.00000  -0.00044
  66 6   H  1S         -0.00020  -0.00033   0.00740   0.00241   0.00641
  67        2S         -0.00247   0.00483  -0.00086   0.00723  -0.01914
  68        3PX         0.00018  -0.00048   0.00100  -0.00079  -0.00078
  69        3PY        -0.00002   0.00009   0.00010   0.00011   0.00021
  70        3PZ         0.00001  -0.00006   0.00031   0.00014  -0.00018
  71 7   H  1S         -0.00020  -0.00032   0.00739   0.00241  -0.00641
  72        2S         -0.00247   0.00483  -0.00087   0.00722   0.01911
  73        3PX         0.00018  -0.00048   0.00100  -0.00079   0.00077
  74        3PY        -0.00002   0.00009   0.00010   0.00011  -0.00021
  75        3PZ        -0.00001   0.00006  -0.00031  -0.00014  -0.00018
  76 8   H  1S         -0.01985   0.04387  -0.08881  -0.13573   0.00001
  77        2S          0.00678  -0.01663  -0.03240  -0.06917   0.00001
  78        3PX        -0.00333   0.00675   0.00423  -0.00810   0.00000
  79        3PY        -0.00458   0.00926  -0.00802  -0.00483   0.00000
  80        3PZ         0.00000   0.00000   0.00000   0.00000   0.01249
                          36        37        38        39        40
  36        3S          0.38285
  37        3PX         0.06816   0.17679
  38        3PY         0.04003  -0.01603   0.08599
  39        3PZ         0.00000   0.00000   0.00000   0.23617
  40        4XX        -0.00790  -0.01351   0.00090   0.00000   0.00128
  41        4YY        -0.00242   0.00026  -0.00148   0.00000   0.00001
  42        4ZZ        -0.00168   0.00107   0.00062   0.00000  -0.00006
  43        4XY        -0.00443  -0.00066  -0.00684   0.00000  -0.00002
  44        4XZ         0.00000   0.00000   0.00000  -0.01173   0.00000
  45        4YZ         0.00000   0.00000   0.00000  -0.00138   0.00000
  46 4   N  1S          0.00045   0.00307   0.00299   0.00000  -0.00009
  47        2S          0.00208  -0.00787  -0.00636   0.00000   0.00012
  48        2PX        -0.12315   0.04153  -0.03863  -0.00001   0.00156
  49        2PY         0.08018  -0.01710   0.02913   0.00000   0.00210
  50        2PZ         0.00000   0.00000   0.00000  -0.07200   0.00000
  51        3S          0.00433  -0.02431  -0.00622  -0.00001   0.00220
  52        3PX        -0.11205   0.04274  -0.03935   0.00000   0.00112
  53        3PY         0.06991  -0.00840   0.02642   0.00000   0.00097
  54        3PZ         0.00000   0.00000   0.00000  -0.07103   0.00000
  55        4XX         0.00300   0.00086   0.00039   0.00000  -0.00014
  56        4YY        -0.00465   0.00026  -0.00017   0.00000  -0.00009
  57        4ZZ         0.00053  -0.00021   0.00021   0.00000   0.00001
  58        4XY         0.00307  -0.00018   0.00027   0.00000  -0.00014
  59        4XZ         0.00000   0.00000   0.00000   0.00171   0.00000
  60        4YZ         0.00000   0.00000   0.00000   0.00254   0.00000
  61 5   H  1S         -0.00473  -0.01458   0.00173   0.00000   0.00058
  62        2S          0.00949  -0.03862   0.01215   0.00001   0.00202
  63        3PX         0.00033   0.00086  -0.00030   0.00000  -0.00002
  64        3PY         0.00026   0.00051  -0.00014   0.00000   0.00000
  65        3PZ         0.00000   0.00000   0.00000  -0.00033   0.00000
  66 6   H  1S          0.00746   0.00319   0.00327   0.00335  -0.00073
  67        2S          0.02300  -0.00637   0.00909  -0.01914  -0.00087
  68        3PX        -0.00129   0.00114  -0.00076  -0.00052   0.00005
  69        3PY        -0.00017   0.00016  -0.00003   0.00017   0.00001
  70        3PZ         0.00035   0.00012   0.00018  -0.00015  -0.00003
  71 7   H  1S          0.00745   0.00319   0.00327  -0.00336  -0.00073
  72        2S          0.02297  -0.00637   0.00908   0.01912  -0.00087
  73        3PX        -0.00129   0.00114  -0.00076   0.00052   0.00005
  74        3PY        -0.00017   0.00016  -0.00003  -0.00017   0.00001
  75        3PZ        -0.00035  -0.00012  -0.00018  -0.00015   0.00003
  76 8   H  1S          0.00937  -0.05796  -0.06951   0.00000   0.00456
  77        2S         -0.04848  -0.01819  -0.04022   0.00000   0.00182
  78        3PX         0.00721   0.00339  -0.00437   0.00000  -0.00031
  79        3PY         0.00823  -0.00535  -0.00184   0.00000   0.00043
  80        3PZ         0.00000   0.00000   0.00000   0.00976   0.00000
                          41        42        43        44        45
  41        4YY         0.00037
  42        4ZZ         0.00004   0.00007
  43        4XY         0.00008  -0.00005   0.00065
  44        4XZ         0.00000   0.00000   0.00000   0.00066
  45        4YZ         0.00000   0.00000   0.00000  -0.00002   0.00013
  46 4   N  1S         -0.00032  -0.00008  -0.00046   0.00000   0.00000
  47        2S          0.00035  -0.00029   0.00089   0.00000   0.00000
  48        2PX         0.00400   0.00088   0.00177   0.00000   0.00000
  49        2PY        -0.00773  -0.00044  -0.00120   0.00000   0.00000
  50        2PZ         0.00000   0.00000   0.00000   0.00040   0.00465
  51        3S         -0.00187  -0.00046   0.00149   0.00000   0.00000
  52        3PX         0.00397   0.00076   0.00167   0.00000   0.00000
  53        3PY        -0.00583  -0.00033  -0.00134   0.00000   0.00000
  54        3PZ         0.00000   0.00000   0.00000   0.00105   0.00374
  55        4XX        -0.00014  -0.00001  -0.00003   0.00000   0.00000
  56        4YY         0.00059   0.00004  -0.00008   0.00000   0.00000
  57        4ZZ        -0.00003   0.00000  -0.00001   0.00000   0.00000
  58        4XY        -0.00012  -0.00003  -0.00003   0.00000   0.00000
  59        4XZ         0.00000   0.00000   0.00000  -0.00001  -0.00010
  60        4YZ         0.00000   0.00000   0.00000   0.00009  -0.00030
  61 5   H  1S          0.00092   0.00062   0.00049   0.00000   0.00000
  62        2S         -0.00035   0.00027   0.00008   0.00000   0.00000
  63        3PX        -0.00006   0.00001  -0.00002   0.00000   0.00000
  64        3PY        -0.00005  -0.00002  -0.00003   0.00000   0.00000
  65        3PZ         0.00000   0.00000   0.00000  -0.00001   0.00000
  66 6   H  1S          0.00002  -0.00013   0.00018   0.00005   0.00044
  67        2S         -0.00025  -0.00023  -0.00001   0.00065   0.00117
  68        3PX        -0.00003  -0.00001  -0.00002   0.00005  -0.00002
  69        3PY         0.00000   0.00001   0.00000   0.00001   0.00000
  70        3PZ        -0.00001  -0.00001   0.00001   0.00001   0.00000
  71 7   H  1S          0.00002  -0.00013   0.00018  -0.00005  -0.00044
  72        2S         -0.00025  -0.00023  -0.00001  -0.00065  -0.00117
  73        3PX        -0.00003  -0.00001  -0.00002  -0.00005   0.00002
  74        3PY         0.00000   0.00001   0.00000  -0.00001   0.00000
  75        3PZ         0.00001   0.00001  -0.00001   0.00001   0.00000
  76 8   H  1S          0.00195  -0.00155   0.00589   0.00000   0.00000
  77        2S          0.00195  -0.00031   0.00335   0.00000   0.00000
  78        3PX         0.00010  -0.00007   0.00030   0.00000   0.00000
  79        3PY         0.00003  -0.00014   0.00014   0.00000   0.00000
  80        3PZ         0.00000   0.00000   0.00000  -0.00050  -0.00005
                          46        47        48        49        50
  46 4   N  1S          1.03732
  47        2S         -0.06908   0.20211
  48        2PX        -0.00492   0.00513   0.29819
  49        2PY        -0.01924   0.03194  -0.01680   0.22375
  50        2PZ         0.00000   0.00000   0.00000   0.00000   0.17445
  51        3S         -0.13470   0.26292   0.04506   0.12397   0.00000
  52        3PX        -0.00572   0.00923   0.26531  -0.02765   0.00000
  53        3PY        -0.02348   0.04844  -0.02805   0.16712   0.00000
  54        3PZ         0.00000   0.00000   0.00000   0.00000   0.14192
  55        4XX        -0.00246  -0.00501  -0.00706   0.00026   0.00000
  56        4YY        -0.00187  -0.00536   0.00009  -0.01772   0.00000
  57        4ZZ        -0.00355  -0.00307  -0.00056   0.00017   0.00000
  58        4XY         0.00033  -0.00023  -0.01256  -0.00171   0.00000
  59        4XZ         0.00000   0.00000   0.00000   0.00000  -0.00371
  60        4YZ         0.00000   0.00000   0.00000   0.00000  -0.01090
  61 5   H  1S          0.00148  -0.00444   0.01941   0.00155   0.00001
  62        2S         -0.00406   0.00758  -0.01106   0.02980   0.00001
  63        3PX        -0.00004  -0.00005  -0.00089   0.00110   0.00000
  64        3PY        -0.00004   0.00007  -0.00075   0.00039   0.00000
  65        3PZ         0.00000   0.00000   0.00000   0.00000  -0.00048
  66 6   H  1S         -0.00127   0.00383  -0.01206  -0.00422   0.02310
  67        2S         -0.00112   0.00389  -0.04677  -0.00623   0.05058
  68        3PX         0.00017  -0.00042   0.00206   0.00041  -0.00047
  69        3PY         0.00013  -0.00025   0.00086   0.00047   0.00024
  70        3PZ        -0.00005   0.00017  -0.00066  -0.00002   0.00014
  71 7   H  1S         -0.00127   0.00383  -0.01204  -0.00422  -0.02311
  72        2S         -0.00112   0.00389  -0.04671  -0.00624  -0.05059
  73        3PX         0.00017  -0.00042   0.00205   0.00041   0.00047
  74        3PY         0.00013  -0.00025   0.00086   0.00047  -0.00024
  75        3PZ         0.00005  -0.00017   0.00066   0.00002   0.00014
  76 8   H  1S         -0.00259   0.00591   0.01542  -0.02423   0.00000
  77        2S         -0.00009   0.00058   0.04293  -0.03725   0.00000
  78        3PX         0.00002   0.00007   0.00006  -0.00135   0.00000
  79        3PY        -0.00004   0.00008  -0.00112   0.00181   0.00000
  80        3PZ         0.00000   0.00000   0.00000   0.00000  -0.00259
                          51        52        53        54        55
  51        3S          0.38329
  52        3PX         0.04039   0.23798
  53        3PY         0.11968  -0.03327   0.12945
  54        3PZ         0.00000   0.00000   0.00000   0.11628
  55        4XX        -0.00710  -0.00629   0.00001   0.00000   0.00034
  56        4YY        -0.01336   0.00090  -0.01346   0.00000   0.00007
  57        4ZZ        -0.00361  -0.00064  -0.00025   0.00000   0.00010
  58        4XY        -0.00296  -0.01078  -0.00051   0.00000   0.00033
  59        4XZ         0.00000   0.00000   0.00000  -0.00301   0.00000
  60        4YZ         0.00000   0.00000   0.00000  -0.00874   0.00000
  61 5   H  1S          0.00263   0.01651  -0.00168   0.00001  -0.00023
  62        2S          0.02448  -0.01292   0.02147   0.00001  -0.00006
  63        3PX         0.00018  -0.00061   0.00091   0.00000   0.00007
  64        3PY        -0.00005  -0.00054   0.00041   0.00000   0.00003
  65        3PZ         0.00000   0.00000   0.00000  -0.00046   0.00000
  66 6   H  1S          0.00105  -0.01256  -0.00249   0.02007  -0.00005
  67        2S         -0.00473  -0.04373  -0.00209   0.04287   0.00062
  68        3PX        -0.00021   0.00202   0.00021  -0.00030  -0.00001
  69        3PY         0.00006   0.00078   0.00026   0.00025   0.00000
  70        3PZ         0.00010  -0.00069   0.00001   0.00013   0.00000
  71 7   H  1S          0.00105  -0.01254  -0.00249  -0.02008  -0.00005
  72        2S         -0.00473  -0.04368  -0.00210  -0.04287   0.00062
  73        3PX        -0.00021   0.00202   0.00021   0.00030  -0.00001
  74        3PY         0.00006   0.00078   0.00026  -0.00025   0.00000
  75        3PZ        -0.00010   0.00069  -0.00001   0.00013   0.00000
  76 8   H  1S          0.00868   0.01611  -0.02417   0.00000  -0.00081
  77        2S         -0.00312   0.04034  -0.03235   0.00000  -0.00115
  78        3PX        -0.00051   0.00039  -0.00107   0.00000   0.00004
  79        3PY         0.00107  -0.00106   0.00105   0.00000  -0.00002
  80        3PZ         0.00000   0.00000   0.00000  -0.00264   0.00000
                          56        57        58        59        60
  56        4YY         0.00152
  57        4ZZ         0.00005   0.00007
  58        4XY         0.00014   0.00001   0.00063
  59        4XZ         0.00000   0.00000   0.00000   0.00008
  60        4YZ         0.00000   0.00000   0.00000   0.00023   0.00070
  61 5   H  1S         -0.00006  -0.00030  -0.00101   0.00000   0.00000
  62        2S         -0.00208  -0.00026  -0.00031   0.00000   0.00000
  63        3PX        -0.00011  -0.00001   0.00009   0.00000   0.00000
  64        3PY        -0.00003   0.00000   0.00006   0.00000   0.00000
  65        3PZ         0.00000   0.00000   0.00000  -0.00001   0.00001
  66 6   H  1S          0.00035   0.00021   0.00005  -0.00012  -0.00111
  67        2S          0.00075   0.00025   0.00138  -0.00076  -0.00277
  68        3PX        -0.00005   0.00000  -0.00003   0.00001   0.00004
  69        3PY        -0.00004  -0.00001  -0.00003   0.00001   0.00000
  70        3PZ         0.00000   0.00001   0.00000   0.00000  -0.00001
  71 7   H  1S          0.00035   0.00021   0.00005   0.00012   0.00111
  72        2S          0.00075   0.00025   0.00138   0.00076   0.00277
  73        3PX        -0.00005   0.00000  -0.00003  -0.00001  -0.00004
  74        3PY        -0.00004  -0.00001  -0.00003  -0.00001   0.00000
  75        3PZ         0.00000  -0.00001   0.00000   0.00000  -0.00001
  76 8   H  1S          0.00088   0.00003  -0.00053   0.00000   0.00000
  77        2S          0.00215  -0.00010  -0.00135   0.00000   0.00000
  78        3PX         0.00002   0.00000   0.00004   0.00000   0.00000
  79        3PY        -0.00011   0.00002  -0.00003   0.00000   0.00000
  80        3PZ         0.00000   0.00000   0.00000   0.00006   0.00008
                          61        62        63        64        65
  61 5   H  1S          0.10955
  62        2S          0.08099   0.07231
  63        3PX         0.00209   0.00139   0.00012
  64        3PY        -0.00306  -0.00187  -0.00003   0.00016
  65        3PZ         0.00000   0.00000   0.00000   0.00000   0.00013
  66 6   H  1S         -0.01301  -0.01941  -0.00069  -0.00151  -0.00279
  67        2S         -0.02395  -0.01856  -0.00104  -0.00056  -0.00253
  68        3PX        -0.00163  -0.00174   0.00003   0.00006  -0.00004
  69        3PY         0.00262   0.00168   0.00007  -0.00009  -0.00009
  70        3PZ        -0.00030  -0.00082  -0.00002  -0.00010  -0.00001
  71 7   H  1S         -0.01301  -0.01941  -0.00069  -0.00151   0.00279
  72        2S         -0.02395  -0.01857  -0.00104  -0.00056   0.00253
  73        3PX        -0.00163  -0.00174   0.00003   0.00006   0.00004
  74        3PY         0.00262   0.00168   0.00007  -0.00009   0.00009
  75        3PZ         0.00030   0.00082   0.00002   0.00010  -0.00001
  76 8   H  1S          0.00455   0.00518  -0.00035  -0.00019   0.00000
  77        2S          0.00169  -0.00432  -0.00041  -0.00018   0.00000
  78        3PX         0.00024  -0.00039   0.00003   0.00001   0.00000
  79        3PY         0.00036   0.00120  -0.00002   0.00000   0.00000
  80        3PZ         0.00000   0.00000   0.00000   0.00000   0.00000
                          66        67        68        69        70
  66 6   H  1S          0.10891
  67        2S          0.09045   0.09172
  68        3PX         0.00081   0.00016   0.00013
  69        3PY         0.00208   0.00125   0.00002   0.00015
  70        3PZ         0.00306   0.00208   0.00001   0.00003   0.00017
  71 7   H  1S         -0.01116  -0.02268  -0.00076  -0.00191   0.00261
  72        2S         -0.02268  -0.02580  -0.00113  -0.00235   0.00162
  73        3PX        -0.00076  -0.00113   0.00009  -0.00004   0.00000
  74        3PY        -0.00191  -0.00235  -0.00004   0.00001   0.00001
  75        3PZ        -0.00261  -0.00161   0.00000  -0.00001  -0.00017
  76 8   H  1S         -0.00162  -0.00208   0.00002  -0.00009  -0.00009
  77        2S         -0.00081  -0.00487   0.00022  -0.00005  -0.00007
  78        3PX        -0.00035  -0.00029   0.00001   0.00000  -0.00002
  79        3PY        -0.00026   0.00003  -0.00001   0.00000  -0.00001
  80        3PZ        -0.00003  -0.00088  -0.00003   0.00000  -0.00001
                          71        72        73        74        75
  71 7   H  1S          0.10891
  72        2S          0.09044   0.09169
  73        3PX         0.00081   0.00016   0.00013
  74        3PY         0.00208   0.00125   0.00002   0.00015
  75        3PZ        -0.00307  -0.00208  -0.00001  -0.00003   0.00017
  76 8   H  1S         -0.00161  -0.00207   0.00002  -0.00009   0.00009
  77        2S         -0.00080  -0.00486   0.00022  -0.00005   0.00007
  78        3PX        -0.00035  -0.00029   0.00001   0.00000   0.00002
  79        3PY        -0.00026   0.00003  -0.00001   0.00000   0.00001
  80        3PZ         0.00003   0.00088   0.00003   0.00000  -0.00001
                          76        77        78        79        80
  76 8   H  1S          0.10680
  77        2S          0.04431   0.02912
  78        3PX         0.00448   0.00143   0.00048
  79        3PY         0.00686   0.00145   0.00031   0.00070
  80        3PZ         0.00000   0.00000   0.00000   0.00000   0.00041
     Beta Density Matrix:
                           1         2         3         4         5
   1 1   C  1S          1.02850
   2        2S         -0.03585   0.14602
   3        2PX        -0.00277   0.00698   0.19278
   4        2PY        -0.00199   0.00626   0.00278   0.18977
   5        2PZ         0.00000   0.00000   0.00000   0.00000   0.18623
   6        3S         -0.10178   0.15619   0.04684   0.02027  -0.00001
   7        3PX        -0.00468   0.00746   0.10355   0.00145   0.00000
   8        3PY        -0.00182   0.00530   0.00768   0.09718  -0.00001
   9        3PZ         0.00000   0.00000  -0.00001  -0.00001   0.08987
  10        4XX        -0.00502   0.00113   0.00690   0.00469   0.00000
  11        4YY        -0.00400  -0.00031  -0.00377   0.00043  -0.00001
  12        4ZZ        -0.00423   0.00005  -0.00132  -0.00533   0.00001
  13        4XY         0.00035  -0.00104   0.00254  -0.00543   0.00000
  14        4XZ         0.00000   0.00000   0.00000   0.00000  -0.00285
  15        4YZ         0.00000   0.00000   0.00000  -0.00001  -0.00776
  16 2   C  1S          0.00604  -0.01288  -0.03465  -0.00875   0.00000
  17        2S         -0.01177   0.02335   0.07137   0.01911   0.00000
  18        2PX         0.02858  -0.05561  -0.13318  -0.03534   0.00000
  19        2PY         0.01049  -0.01978  -0.04831  -0.00402   0.00000
  20        2PZ         0.00000   0.00000   0.00000   0.00000   0.01901
  21        3S         -0.00146   0.01277   0.07126   0.01879   0.00000
  22        3PX        -0.00675   0.00610  -0.01198   0.00111   0.00000
  23        3PY         0.00611  -0.01286  -0.02508  -0.01816   0.00000
  24        3PZ         0.00000   0.00000   0.00000   0.00000  -0.00184
  25        4XX        -0.00451   0.00737   0.00635   0.00417   0.00000
  26        4YY         0.00127  -0.00328  -0.00455  -0.00326   0.00000
  27        4ZZ         0.00007  -0.00051  -0.00029  -0.00025   0.00000
  28        4XY        -0.00253   0.00473   0.00828  -0.00288   0.00000
  29        4XZ         0.00000   0.00000   0.00000   0.00000  -0.00561
  30        4YZ         0.00000   0.00000   0.00000   0.00000  -0.00219
  31 3   O  1S         -0.00170   0.00289   0.00588  -0.00041   0.00000
  32        2S          0.00353  -0.00680  -0.01643   0.00348   0.00000
  33        2PX        -0.01366   0.03001   0.04957  -0.00123   0.00000
  34        2PY         0.00461  -0.00819  -0.02186  -0.00800   0.00000
  35        2PZ         0.00000   0.00000   0.00000   0.00000  -0.01606
  36        3S          0.01027  -0.01651  -0.03351  -0.01126   0.00000
  37        3PX        -0.01312   0.02775   0.04904   0.00328   0.00000
  38        3PY         0.00605  -0.01001  -0.02334  -0.00900   0.00000
  39        3PZ         0.00000   0.00000   0.00000   0.00000  -0.01265
  40        4XX        -0.00013  -0.00018   0.00106   0.00044   0.00000
  41        4YY        -0.00001  -0.00017  -0.00191   0.00050   0.00000
  42        4ZZ        -0.00045   0.00023  -0.00041   0.00070   0.00000
  43        4XY        -0.00007  -0.00013  -0.00146   0.00004   0.00000
  44        4XZ         0.00000   0.00000   0.00000   0.00000  -0.00033
  45        4YZ         0.00000   0.00000   0.00000   0.00000  -0.00001
  46 4   N  1S         -0.00160   0.00348   0.00451   0.00481   0.00000
  47        2S          0.00359  -0.00872  -0.01207  -0.01287   0.00000
  48        2PX        -0.01547   0.03101   0.03939   0.02273   0.00000
  49        2PY        -0.00441   0.00748   0.02285   0.00270   0.00000
  50        2PZ         0.00000   0.00000   0.00000   0.00000  -0.01258
  51        3S          0.00178  -0.00410  -0.00792  -0.00916   0.00000
  52        3PX        -0.01487   0.03041   0.04421   0.02463   0.00000
  53        3PY        -0.00272   0.00344   0.01716  -0.00011   0.00000
  54        3PZ         0.00000   0.00000   0.00000   0.00000  -0.01288
  55        4XX        -0.00020   0.00023   0.00075   0.00060   0.00000
  56        4YY         0.00064  -0.00105  -0.00257  -0.00040   0.00000
  57        4ZZ        -0.00021  -0.00004  -0.00006  -0.00055   0.00000
  58        4XY         0.00017  -0.00037   0.00096   0.00020   0.00000
  59        4XZ         0.00000   0.00000   0.00000   0.00000  -0.00039
  60        4YZ         0.00000   0.00000   0.00000   0.00000   0.00012
  61 5   H  1S         -0.02834   0.05351  -0.07121   0.10831  -0.00005
  62        2S         -0.00448   0.01423  -0.06408   0.08675  -0.00004
  63        3PX        -0.00145   0.00235   0.00157   0.00340   0.00000
  64        3PY         0.00219  -0.00330   0.00385  -0.00055   0.00000
  65        3PZ         0.00000   0.00000   0.00000   0.00000   0.00495
  66 6   H  1S         -0.02559   0.04645  -0.02871  -0.07206  -0.10436
  67        2S         -0.00090   0.00645  -0.03213  -0.06589  -0.09377
  68        3PX        -0.00065   0.00122   0.00430  -0.00079  -0.00152
  69        3PY        -0.00159   0.00254  -0.00085   0.00235  -0.00356
  70        3PZ        -0.00212   0.00321  -0.00165  -0.00372  -0.00039
  71 7   H  1S         -0.02559   0.04645  -0.02873  -0.07197   0.10441
  72        2S         -0.00090   0.00646  -0.03214  -0.06580   0.09382
  73        3PX        -0.00065   0.00122   0.00430  -0.00079   0.00152
  74        3PY        -0.00159   0.00254  -0.00085   0.00235   0.00356
  75        3PZ         0.00213  -0.00321   0.00165   0.00372  -0.00040
  76 8   H  1S          0.00210  -0.00530  -0.00958   0.00155   0.00000
  77        2S          0.00028  -0.00010  -0.00119   0.00013   0.00000
  78        3PX        -0.00001   0.00002   0.00034   0.00111   0.00000
  79        3PY         0.00045  -0.00081  -0.00088   0.00010   0.00000
  80        3PZ         0.00000   0.00000   0.00000   0.00000  -0.00014
                           6         7         8         9        10
   6        3S          0.22656
   7        3PX         0.04361   0.06338
   8        3PY         0.01928   0.00419   0.05242
   9        3PZ        -0.00002  -0.00001   0.00000   0.04572
  10        4XX         0.00181   0.00321   0.00230   0.00000   0.00049
  11        4YY        -0.00120  -0.00216   0.00015   0.00000  -0.00012
  12        4ZZ         0.00028  -0.00060  -0.00259   0.00000  -0.00018
  13        4XY        -0.00302   0.00051  -0.00258   0.00000  -0.00004
  14        4XZ         0.00000   0.00000   0.00000  -0.00105   0.00000
  15        4YZ         0.00000   0.00000   0.00000  -0.00347   0.00000
  16 2   C  1S          0.00484  -0.00385  -0.00307   0.00000  -0.00376
  17        2S         -0.00199   0.01285   0.00990  -0.00001   0.00609
  18        2PX        -0.07529  -0.07687  -0.02065   0.00000  -0.00471
  19        2PY        -0.04551  -0.04233   0.00658   0.00000  -0.00316
  20        2PZ         0.00000   0.00000   0.00001   0.01783   0.00000
  21        3S          0.00726   0.01982   0.01398  -0.00001   0.00461
  22        3PX         0.03957   0.00234   0.00507  -0.00001  -0.00117
  23        3PY        -0.03277  -0.01538  -0.01099   0.00001  -0.00152
  24        3PZ         0.00000   0.00000   0.00001   0.00568   0.00000
  25        4XX         0.01350   0.00458   0.00323   0.00000   0.00027
  26        4YY        -0.00844  -0.00254  -0.00342   0.00000  -0.00004
  27        4ZZ         0.00047   0.00014   0.00021   0.00000  -0.00014
  28        4XY         0.01288   0.00569  -0.00012   0.00000   0.00003
  29        4XZ         0.00000   0.00000   0.00000  -0.00301   0.00000
  30        4YZ         0.00000   0.00000   0.00000   0.00052   0.00000
  31 3   O  1S          0.00797   0.00285   0.00034   0.00000  -0.00025
  32        2S         -0.01962  -0.00846   0.00002   0.00000   0.00038
  33        2PX         0.08141   0.03655   0.02351  -0.00001  -0.00219
  34        2PY        -0.04032  -0.01959  -0.00876   0.00000   0.00161
  35        2PZ         0.00001   0.00000  -0.00003  -0.03260   0.00000
  36        3S         -0.05502  -0.01714  -0.00843   0.00001  -0.00126
  37        3PX         0.07444   0.03385   0.02035  -0.00001  -0.00089
  38        3PY        -0.03850  -0.01810  -0.00931   0.00000   0.00055
  39        3PZ         0.00001   0.00000  -0.00003  -0.02665   0.00000
  40        4XX        -0.00175   0.00026  -0.00112   0.00000   0.00030
  41        4YY         0.00048  -0.00159   0.00063   0.00000  -0.00003
  42        4ZZ         0.00064  -0.00018   0.00050   0.00000  -0.00001
  43        4XY         0.00138  -0.00015   0.00016   0.00000  -0.00020
  44        4XZ         0.00000   0.00000   0.00000   0.00067   0.00000
  45        4YZ         0.00000   0.00000   0.00000   0.00037   0.00000
  46 4   N  1S          0.00206  -0.00231   0.00484   0.00000   0.00015
  47        2S         -0.00626   0.00337  -0.01237   0.00001  -0.00043
  48        2PX         0.14711   0.04855   0.02235  -0.00002   0.00068
  49        2PY         0.01994   0.04045  -0.00994   0.00001   0.00022
  50        2PZ         0.00000   0.00000   0.00002   0.00944   0.00000
  51        3S          0.01927   0.02313  -0.01591   0.00001  -0.00049
  52        3PX         0.13444   0.04630   0.02312  -0.00002   0.00109
  53        3PY         0.00713   0.02910  -0.00896   0.00001   0.00025
  54        3PZ         0.00000   0.00000   0.00002   0.00725   0.00000
  55        4XX        -0.00198  -0.00034   0.00035   0.00000   0.00003
  56        4YY        -0.00307  -0.00396   0.00057   0.00000   0.00000
  57        4ZZ        -0.00027  -0.00013  -0.00026   0.00000  -0.00002
  58        4XY        -0.00486  -0.00099  -0.00007   0.00000   0.00009
  59        4XZ         0.00000   0.00000   0.00000  -0.00053   0.00000
  60        4YZ         0.00000   0.00000   0.00000  -0.00078   0.00000
  61 5   H  1S          0.05334  -0.03541   0.05300  -0.00003   0.00053
  62        2S          0.00221  -0.03152   0.03810  -0.00002   0.00031
  63        3PX         0.00244   0.00082   0.00174   0.00000   0.00015
  64        3PY        -0.00308   0.00192  -0.00021   0.00000   0.00010
  65        3PZ         0.00000   0.00000   0.00000   0.00238   0.00000
  66 6   H  1S          0.03672  -0.01501  -0.03697  -0.04913  -0.00246
  67        2S         -0.01675  -0.02074  -0.03513  -0.04082  -0.00256
  68        3PX         0.00249   0.00242  -0.00023  -0.00072   0.00014
  69        3PY         0.00283  -0.00032   0.00118  -0.00171   0.00004
  70        3PZ         0.00268  -0.00084  -0.00193  -0.00017  -0.00012
  71 7   H  1S          0.03673  -0.01502  -0.03693   0.04916  -0.00246
  72        2S         -0.01672  -0.02073  -0.03510   0.04085  -0.00256
  73        3PX         0.00249   0.00242  -0.00023   0.00072   0.00014
  74        3PY         0.00283  -0.00032   0.00119   0.00171   0.00004
  75        3PZ        -0.00268   0.00084   0.00193  -0.00017   0.00012
  76 8   H  1S         -0.00335  -0.00423  -0.00335   0.00000  -0.00026
  77        2S          0.01415   0.00026   0.00120   0.00000  -0.00033
  78        3PX         0.00103   0.00041   0.00093   0.00000  -0.00006
  79        3PY        -0.00194  -0.00043  -0.00065   0.00000   0.00006
  80        3PZ         0.00000   0.00000   0.00000  -0.00089   0.00000
                          11        12        13        14        15
  11        4YY         0.00011
  12        4ZZ         0.00003   0.00019
  13        4XY        -0.00001   0.00013   0.00040
  14        4XZ         0.00000   0.00000   0.00000   0.00026
  15        4YZ         0.00000   0.00000   0.00000   0.00022   0.00038
  16 2   C  1S          0.00036   0.00030  -0.00105   0.00000   0.00000
  17        2S         -0.00127  -0.00122   0.00211   0.00000   0.00000
  18        2PX         0.00197   0.00208  -0.00172   0.00000   0.00000
  19        2PY         0.00238   0.00081   0.00406   0.00000   0.00000
  20        2PZ         0.00000   0.00000   0.00000   0.00578   0.00213
  21        3S         -0.00133  -0.00095   0.00165   0.00000   0.00000
  22        3PX        -0.00010   0.00059  -0.00175   0.00000   0.00000
  23        3PY         0.00080   0.00053   0.00132   0.00000   0.00000
  24        3PZ         0.00000   0.00000   0.00000   0.00411   0.00209
  25        4XX        -0.00015  -0.00005  -0.00024   0.00000   0.00000
  26        4YY         0.00009   0.00001   0.00005   0.00000   0.00000
  27        4ZZ         0.00002   0.00003   0.00003   0.00000   0.00000
  28        4XY        -0.00017   0.00012   0.00003   0.00000   0.00000
  29        4XZ         0.00000   0.00000   0.00000   0.00019   0.00026
  30        4YZ         0.00000   0.00000   0.00000   0.00026   0.00028
  31 3   O  1S         -0.00029  -0.00017   0.00002   0.00000   0.00000
  32        2S          0.00065   0.00030  -0.00014   0.00000   0.00000
  33        2PX         0.00010   0.00146   0.00330   0.00000   0.00000
  34        2PY        -0.00053   0.00024  -0.00067   0.00000   0.00000
  35        2PZ         0.00000   0.00000   0.00000   0.00142  -0.00045
  36        3S          0.00150   0.00069   0.00195   0.00000   0.00000
  37        3PX        -0.00029   0.00097   0.00199   0.00000   0.00000
  38        3PY        -0.00002   0.00017  -0.00015   0.00000   0.00000
  39        3PZ         0.00000   0.00000   0.00000   0.00047  -0.00067
  40        4XX        -0.00010  -0.00012  -0.00022   0.00000   0.00000
  41        4YY         0.00004   0.00003  -0.00004   0.00000   0.00000
  42        4ZZ         0.00001   0.00000  -0.00003   0.00000   0.00000
  43        4XY         0.00006   0.00001  -0.00002   0.00000   0.00000
  44        4XZ         0.00000   0.00000   0.00000  -0.00013   0.00001
  45        4YZ         0.00000   0.00000   0.00000   0.00016   0.00009
  46 4   N  1S         -0.00030  -0.00021  -0.00031   0.00000   0.00000
  47        2S          0.00053   0.00035   0.00059   0.00000   0.00000
  48        2PX        -0.00222   0.00044  -0.00633   0.00000   0.00000
  49        2PY        -0.00093  -0.00083  -0.00227   0.00000   0.00000
  50        2PZ         0.00000   0.00000   0.00000   0.00579   0.00369
  51        3S          0.00008   0.00008  -0.00144   0.00000   0.00000
  52        3PX        -0.00205   0.00025  -0.00534   0.00000   0.00000
  53        3PY        -0.00056  -0.00058  -0.00110   0.00000   0.00000
  54        3PZ         0.00000   0.00000   0.00000   0.00458   0.00310
  55        4XX         0.00003  -0.00004   0.00015   0.00000   0.00000
  56        4YY         0.00007   0.00007   0.00017   0.00000   0.00000
  57        4ZZ         0.00000   0.00001   0.00001   0.00000   0.00000
  58        4XY         0.00007  -0.00006   0.00033   0.00000   0.00000
  59        4XZ         0.00000   0.00000   0.00000  -0.00011  -0.00005
  60        4YZ         0.00000   0.00000   0.00000  -0.00038  -0.00021
  61 5   H  1S          0.00154  -0.00244  -0.00486   0.00000   0.00000
  62        2S          0.00131  -0.00228  -0.00394   0.00000   0.00000
  63        3PX        -0.00001  -0.00011  -0.00005   0.00000   0.00000
  64        3PY        -0.00007  -0.00002   0.00011   0.00000   0.00000
  65        3PZ         0.00000   0.00000   0.00000  -0.00008  -0.00021
  66 6   H  1S          0.00045   0.00235   0.00161   0.00215   0.00465
  67        2S          0.00067   0.00195   0.00225   0.00277   0.00472
  68        3PX        -0.00009   0.00000   0.00005  -0.00001   0.00005
  69        3PY         0.00002  -0.00005  -0.00011   0.00005   0.00015
  70        3PZ         0.00003   0.00012   0.00008   0.00001   0.00002
  71 7   H  1S          0.00044   0.00235   0.00161  -0.00215  -0.00465
  72        2S          0.00066   0.00196   0.00224  -0.00277  -0.00471
  73        3PX        -0.00009   0.00000   0.00005   0.00001  -0.00005
  74        3PY         0.00002  -0.00005  -0.00011  -0.00005  -0.00015
  75        3PZ        -0.00003  -0.00012  -0.00008   0.00001   0.00002
  76 8   H  1S          0.00038  -0.00027  -0.00075   0.00000   0.00000
  77        2S         -0.00002   0.00008  -0.00064   0.00000   0.00000
  78        3PX         0.00005   0.00000   0.00004   0.00000   0.00000
  79        3PY         0.00001  -0.00004  -0.00009   0.00000   0.00000
  80        3PZ         0.00000   0.00000   0.00000   0.00003  -0.00004
                          16        17        18        19        20
  16 2   C  1S          1.02720
  17        2S         -0.04091   0.16506
  18        2PX         0.00226  -0.00472   0.17617
  19        2PY        -0.00959   0.01929   0.02517   0.18612
  20        2PZ         0.00000   0.00000   0.00000   0.00000   0.17426
  21        3S         -0.06585   0.11489  -0.01466   0.01731   0.00001
  22        3PX         0.01466  -0.02154   0.02675  -0.00350   0.00000
  23        3PY         0.00743  -0.01646   0.00680   0.02410   0.00000
  24        3PZ         0.00000   0.00000   0.00000   0.00000   0.11552
  25        4XX        -0.00519   0.00067  -0.00479  -0.00510   0.00000
  26        4YY        -0.00435  -0.00005   0.00300  -0.00209   0.00000
  27        4ZZ        -0.00336  -0.00382  -0.00159   0.00210   0.00000
  28        4XY        -0.00062   0.00082  -0.00494   0.00527   0.00000
  29        4XZ         0.00000   0.00000   0.00000   0.00000   0.00263
  30        4YZ         0.00000   0.00000   0.00000   0.00000   0.00598
  31 3   O  1S          0.00272  -0.00170  -0.01057   0.01343   0.00000
  32        2S         -0.00560   0.00451   0.02752  -0.03230   0.00000
  33        2PX         0.02330  -0.04799  -0.06219   0.08328   0.00000
  34        2PY        -0.02779   0.05497   0.07571  -0.09399   0.00000
  35        2PZ         0.00000   0.00000   0.00000   0.00000   0.03762
  36        3S          0.00932  -0.03219   0.00707  -0.01790   0.00000
  37        3PX         0.01204  -0.02325  -0.04597   0.05248   0.00000
  38        3PY        -0.01526   0.02613   0.04578  -0.05184   0.00000
  39        3PZ         0.00000   0.00000   0.00000   0.00000   0.01120
  40        4XX        -0.00231   0.00420   0.00087  -0.00770   0.00000
  41        4YY        -0.00197   0.00292   0.00437   0.00392   0.00000
  42        4ZZ         0.00067  -0.00014   0.00046   0.00026   0.00000
  43        4XY         0.00320  -0.00474  -0.00202   0.00463   0.00000
  44        4XZ         0.00000   0.00000   0.00000   0.00000  -0.00413
  45        4YZ         0.00000   0.00000   0.00000   0.00000   0.00443
  46 4   N  1S          0.00553  -0.00677  -0.00918  -0.02274   0.00000
  47        2S         -0.01208   0.01464   0.02103   0.04969   0.00000
  48        2PX         0.01066  -0.02352   0.03476  -0.07754   0.00000
  49        2PY         0.04744  -0.10234  -0.07655  -0.13285   0.00001
  50        2PZ         0.00000   0.00000   0.00000   0.00000   0.15587
  51        3S          0.00844  -0.02822   0.00507  -0.00223   0.00000
  52        3PX         0.00237  -0.00834   0.02557  -0.05856   0.00000
  53        3PY         0.03036  -0.06745  -0.05610  -0.08645   0.00000
  54        3PZ         0.00000   0.00000   0.00000   0.00000   0.12150
  55        4XX         0.00005  -0.00002  -0.00330   0.00097   0.00000
  56        4YY        -0.00462   0.00883   0.00746   0.00856   0.00000
  57        4ZZ         0.00037  -0.00070  -0.00023  -0.00103   0.00000
  58        4XY        -0.00149   0.00326  -0.00374   0.00535   0.00000
  59        4XZ         0.00000   0.00000   0.00000   0.00000  -0.00338
  60        4YZ         0.00000   0.00000   0.00000   0.00000  -0.01063
  61 5   H  1S          0.00446  -0.01038   0.01459  -0.00134   0.00000
  62        2S          0.00879  -0.01936   0.01733  -0.01433   0.00000
  63        3PX        -0.00054   0.00112  -0.00320  -0.00031   0.00000
  64        3PY        -0.00050   0.00094  -0.00159  -0.00025   0.00000
  65        3PZ         0.00000   0.00000   0.00000   0.00000   0.00035
  66 6   H  1S          0.00354  -0.00915   0.01313   0.00761   0.00503
  67        2S          0.00517  -0.01011   0.02184   0.02030   0.02783
  68        3PX        -0.00069   0.00152  -0.00293  -0.00153  -0.00100
  69        3PY        -0.00002   0.00007  -0.00067  -0.00059  -0.00039
  70        3PZ         0.00025  -0.00044   0.00043   0.00022   0.00001
  71 7   H  1S          0.00354  -0.00915   0.01313   0.00760  -0.00503
  72        2S          0.00517  -0.01011   0.02184   0.02028  -0.02783
  73        3PX        -0.00069   0.00152  -0.00293  -0.00153   0.00100
  74        3PY        -0.00002   0.00007  -0.00067  -0.00059   0.00039
  75        3PZ        -0.00025   0.00044  -0.00043  -0.00022   0.00001
  76 8   H  1S          0.00422  -0.00919  -0.00462   0.01937   0.00000
  77        2S          0.00087  -0.00073   0.00595   0.02003   0.00000
  78        3PX         0.00063  -0.00183  -0.00189   0.00352   0.00000
  79        3PY         0.00006   0.00003   0.00049  -0.00274   0.00000
  80        3PZ         0.00000   0.00000   0.00000   0.00000   0.00095
                          21        22        23        24        25
  21        3S          0.09314
  22        3PX        -0.00893   0.03022
  23        3PY        -0.01830  -0.01149   0.01611
  24        3PZ         0.00001   0.00000   0.00000   0.07801
  25        4XX         0.00252   0.00320  -0.00294   0.00000   0.00126
  26        4YY        -0.00362  -0.00332   0.00248   0.00000  -0.00094
  27        4ZZ        -0.00163   0.00053   0.00020   0.00000   0.00003
  28        4XY         0.00289   0.00501  -0.00318   0.00000   0.00065
  29        4XZ         0.00000   0.00000   0.00000   0.00202   0.00000
  30        4YZ         0.00000   0.00000   0.00000   0.00469   0.00000
  31 3   O  1S          0.00886   0.00581  -0.00943   0.00000  -0.00053
  32        2S         -0.02100  -0.01400   0.01992   0.00000   0.00117
  33        2PX        -0.00323   0.02623   0.00970   0.00000   0.01103
  34        2PY         0.03656  -0.00781  -0.00430   0.00000   0.00260
  35        2PZ         0.00000   0.00000   0.00001   0.01593   0.00000
  36        3S         -0.05181  -0.03523   0.04470   0.00000  -0.00059
  37        3PX         0.00761   0.02424   0.00054   0.00000   0.00937
  38        3PY         0.01303  -0.01105   0.00302   0.00000  -0.00011
  39        3PZ         0.00000   0.00000   0.00001   0.00016   0.00000
  40        4XX         0.00156  -0.00130  -0.00159   0.00000  -0.00039
  41        4YY         0.00232   0.00152  -0.00066   0.00000   0.00003
  42        4ZZ         0.00026   0.00050  -0.00025   0.00000   0.00009
  43        4XY        -0.00328   0.00091   0.00035   0.00000  -0.00022
  44        4XZ         0.00000   0.00000   0.00000  -0.00234   0.00000
  45        4YZ         0.00000   0.00000   0.00000   0.00304   0.00000
  46 4   N  1S          0.00973  -0.00294  -0.00306   0.00000   0.00139
  47        2S         -0.01560   0.00696   0.01246   0.00000  -0.00335
  48        2PX         0.00378   0.08524  -0.05421   0.00001   0.01221
  49        2PY        -0.08788  -0.01321   0.00895   0.00000   0.00118
  50        2PZ         0.00001   0.00000  -0.00001   0.10865   0.00000
  51        3S         -0.05686   0.01613   0.01044   0.00000  -0.00263
  52        3PX         0.01319   0.07513  -0.04934   0.00001   0.01116
  53        3PY        -0.06242  -0.01338   0.01071   0.00000   0.00025
  54        3PZ         0.00001   0.00000  -0.00001   0.08548   0.00000
  55        4XX         0.00037  -0.00219   0.00089   0.00000  -0.00010
  56        4YY         0.00747   0.00054  -0.00072   0.00000  -0.00011
  57        4ZZ        -0.00025  -0.00024  -0.00001   0.00000   0.00001
  58        4XY         0.00197  -0.00376   0.00188   0.00000  -0.00041
  59        4XZ         0.00000   0.00000   0.00000  -0.00231   0.00000
  60        4YZ         0.00000   0.00000   0.00000  -0.00726   0.00000
  61 5   H  1S         -0.01470   0.00974  -0.00735   0.00001   0.00271
  62        2S         -0.02501  -0.00141   0.00023   0.00000  -0.00055
  63        3PX         0.00081  -0.00057  -0.00030   0.00000   0.00017
  64        3PY         0.00114  -0.00062  -0.00002   0.00000  -0.00007
  65        3PZ         0.00000   0.00000   0.00000  -0.00015   0.00000
  66 6   H  1S         -0.01311   0.00165   0.00801   0.01173  -0.00024
  67        2S         -0.01399  -0.00805   0.01521   0.02704  -0.00300
  68        3PX         0.00152   0.00007  -0.00075  -0.00053   0.00020
  69        3PY        -0.00009   0.00024  -0.00035   0.00002   0.00016
  70        3PZ        -0.00074   0.00007   0.00039   0.00005   0.00001
  71 7   H  1S         -0.01311   0.00165   0.00801  -0.01174  -0.00023
  72        2S         -0.01399  -0.00803   0.01520  -0.02705  -0.00299
  73        3PX         0.00153   0.00007  -0.00075   0.00053   0.00020
  74        3PY        -0.00009   0.00024  -0.00035  -0.00002   0.00016
  75        3PZ         0.00074  -0.00007  -0.00039   0.00005  -0.00001
  76 8   H  1S         -0.01884  -0.00218   0.00179   0.00000  -0.00393
  77        2S          0.00119   0.01174  -0.00725   0.00000  -0.00063
  78        3PX        -0.00149   0.00011   0.00077   0.00000   0.00004
  79        3PY        -0.00177  -0.00125   0.00058   0.00000  -0.00029
  80        3PZ         0.00000   0.00000   0.00000   0.00030   0.00000
                          26        27        28        29        30
  26        4YY         0.00148
  27        4ZZ        -0.00025   0.00022
  28        4XY        -0.00086   0.00026   0.00240
  29        4XZ         0.00000   0.00000   0.00000   0.00034
  30        4YZ         0.00000   0.00000   0.00000  -0.00012   0.00108
  31 3   O  1S         -0.00245   0.00119   0.00499   0.00000   0.00000
  32        2S          0.00547  -0.00282  -0.01141   0.00000   0.00000
  33        2PX        -0.01383   0.00315   0.00614   0.00000   0.00000
  34        2PY         0.00081  -0.00428  -0.01415   0.00000   0.00000
  35        2PZ         0.00000   0.00000   0.00000   0.00767  -0.01612
  36        3S          0.00736  -0.00235  -0.01833   0.00000   0.00000
  37        3PX        -0.01095   0.00205   0.00599   0.00000   0.00000
  38        3PY         0.00214  -0.00248  -0.00982   0.00000   0.00000
  39        3PZ         0.00000   0.00000   0.00000   0.00571  -0.01340
  40        4XX         0.00070  -0.00022  -0.00014   0.00000   0.00000
  41        4YY        -0.00018  -0.00002   0.00035   0.00000   0.00000
  42        4ZZ        -0.00015   0.00001   0.00004   0.00000   0.00000
  43        4XY        -0.00003   0.00025   0.00067   0.00000   0.00000
  44        4XZ         0.00000   0.00000   0.00000  -0.00032   0.00054
  45        4YZ         0.00000   0.00000   0.00000   0.00005   0.00026
  46 4   N  1S         -0.00517   0.00109  -0.00261   0.00000   0.00000
  47        2S          0.00885  -0.00230   0.00465   0.00000   0.00000
  48        2PX        -0.00931   0.00037   0.01686   0.00000   0.00000
  49        2PY         0.00671  -0.00027  -0.00708   0.00000   0.00000
  50        2PZ         0.00000   0.00000   0.00000   0.00146   0.01084
  51        3S          0.01288  -0.00285   0.00562   0.00000   0.00000
  52        3PX        -0.00870   0.00025   0.01597   0.00000   0.00000
  53        3PY         0.00610  -0.00062  -0.00564   0.00000   0.00000
  54        3PZ         0.00000   0.00000   0.00000   0.00091   0.00940
  55        4XX        -0.00009   0.00008  -0.00041   0.00000   0.00000
  56        4YY        -0.00051  -0.00003   0.00021   0.00000   0.00000
  57        4ZZ        -0.00007   0.00004  -0.00011   0.00000   0.00000
  58        4XY         0.00020   0.00001  -0.00044   0.00000   0.00000
  59        4XZ         0.00000   0.00000   0.00000  -0.00001  -0.00023
  60        4YZ         0.00000   0.00000   0.00000  -0.00013  -0.00058
  61 5   H  1S         -0.00092  -0.00036  -0.00301   0.00000   0.00000
  62        2S          0.00243  -0.00060  -0.00569   0.00000   0.00000
  63        3PX        -0.00007  -0.00001  -0.00002   0.00000   0.00000
  64        3PY         0.00001   0.00001   0.00003   0.00000   0.00000
  65        3PZ         0.00000   0.00000   0.00000  -0.00015  -0.00007
  66 6   H  1S          0.00084   0.00002   0.00126   0.00333   0.00208
  67        2S          0.00224   0.00009  -0.00164   0.00290   0.00413
  68        3PX        -0.00013  -0.00001   0.00029   0.00002   0.00002
  69        3PY        -0.00006  -0.00001  -0.00001   0.00011   0.00005
  70        3PZ         0.00004   0.00000   0.00007   0.00001   0.00002
  71 7   H  1S          0.00084   0.00002   0.00126  -0.00333  -0.00208
  72        2S          0.00224   0.00009  -0.00164  -0.00291  -0.00413
  73        3PX        -0.00013  -0.00001   0.00029  -0.00002  -0.00002
  74        3PY        -0.00006  -0.00001  -0.00001  -0.00011  -0.00005
  75        3PZ        -0.00004   0.00000  -0.00007   0.00001   0.00002
  76 8   H  1S          0.00432   0.00058   0.00373   0.00000   0.00000
  77        2S         -0.00062   0.00079   0.00557   0.00000   0.00000
  78        3PX        -0.00004   0.00009   0.00017   0.00000   0.00000
  79        3PY         0.00061  -0.00012  -0.00035   0.00000   0.00000
  80        3PZ         0.00000   0.00000   0.00000   0.00023  -0.00054
                          31        32        33        34        35
  31 3   O  1S          1.03966
  32        2S         -0.09175   0.26060
  33        2PX        -0.01801   0.03374   0.33357
  34        2PY        -0.00425   0.01163  -0.00035   0.27036
  35        2PZ         0.00000   0.00000   0.00001   0.00000   0.38637
  36        3S         -0.12508   0.29096   0.10025   0.04254   0.00000
  37        3PX        -0.01563   0.03249   0.23985  -0.00502   0.00000
  38        3PY        -0.00664   0.01637  -0.01544   0.14968   0.00000
  39        3PZ         0.00000   0.00000   0.00000   0.00000   0.30083
  40        4XX        -0.00415  -0.00316  -0.01934   0.00067   0.00000
  41        4YY        -0.00566   0.00044  -0.00054  -0.00204   0.00000
  42        4ZZ        -0.00483  -0.00183   0.00156   0.00148   0.00000
  43        4XY         0.00160  -0.00308  -0.00079  -0.01243   0.00000
  44        4XZ         0.00000   0.00000   0.00000   0.00000  -0.01542
  45        4YZ         0.00000   0.00000   0.00000   0.00000  -0.00114
  46 4   N  1S         -0.00102   0.00218   0.00207   0.00535   0.00000
  47        2S          0.00180  -0.00461  -0.00433  -0.01202   0.00000
  48        2PX         0.01356  -0.02867   0.02113  -0.02860   0.00000
  49        2PY        -0.01192   0.02638  -0.00919   0.03979   0.00000
  50        2PZ         0.00000   0.00000   0.00000   0.00000  -0.06982
  51        3S          0.00323  -0.00617  -0.02493  -0.01230  -0.00001
  52        3PX         0.01169  -0.02495   0.02507  -0.03264   0.00000
  53        3PY        -0.01053   0.02265   0.00141   0.03720   0.00000
  54        3PZ         0.00000   0.00000   0.00000   0.00000  -0.07326
  55        4XX        -0.00030   0.00054   0.00186   0.00000   0.00000
  56        4YY         0.00028  -0.00066  -0.00077   0.00038   0.00000
  57        4ZZ        -0.00018   0.00035  -0.00028   0.00021   0.00000
  58        4XY         0.00011  -0.00030   0.00098  -0.00071   0.00000
  59        4XZ         0.00000   0.00000   0.00000   0.00000   0.00171
  60        4YZ         0.00000   0.00000   0.00000   0.00000   0.00177
  61 5   H  1S         -0.00090   0.00481  -0.02040   0.00375   0.00000
  62        2S         -0.00216   0.00747  -0.04797   0.01473   0.00002
  63        3PX         0.00000   0.00000   0.00111  -0.00035   0.00000
  64        3PY        -0.00006   0.00001   0.00062  -0.00018   0.00000
  65        3PZ         0.00000   0.00000   0.00000   0.00000  -0.00044
  66 6   H  1S         -0.00020  -0.00033   0.00740   0.00241   0.00641
  67        2S         -0.00247   0.00483  -0.00086   0.00723  -0.01914
  68        3PX         0.00018  -0.00048   0.00100  -0.00079  -0.00078
  69        3PY        -0.00002   0.00009   0.00010   0.00011   0.00021
  70        3PZ         0.00001  -0.00006   0.00031   0.00014  -0.00018
  71 7   H  1S         -0.00020  -0.00032   0.00739   0.00241  -0.00641
  72        2S         -0.00247   0.00483  -0.00087   0.00722   0.01911
  73        3PX         0.00018  -0.00048   0.00100  -0.00079   0.00077
  74        3PY        -0.00002   0.00009   0.00010   0.00011  -0.00021
  75        3PZ        -0.00001   0.00006  -0.00031  -0.00014  -0.00018
  76 8   H  1S         -0.01985   0.04387  -0.08881  -0.13573   0.00001
  77        2S          0.00678  -0.01663  -0.03240  -0.06917   0.00001
  78        3PX        -0.00333   0.00675   0.00423  -0.00810   0.00000
  79        3PY        -0.00458   0.00926  -0.00802  -0.00483   0.00000
  80        3PZ         0.00000   0.00000   0.00000   0.00000   0.01249
                          36        37        38        39        40
  36        3S          0.38285
  37        3PX         0.06816   0.17679
  38        3PY         0.04003  -0.01603   0.08599
  39        3PZ         0.00000   0.00000   0.00000   0.23617
  40        4XX        -0.00790  -0.01351   0.00090   0.00000   0.00128
  41        4YY        -0.00242   0.00026  -0.00148   0.00000   0.00001
  42        4ZZ        -0.00168   0.00107   0.00062   0.00000  -0.00006
  43        4XY        -0.00443  -0.00066  -0.00684   0.00000  -0.00002
  44        4XZ         0.00000   0.00000   0.00000  -0.01173   0.00000
  45        4YZ         0.00000   0.00000   0.00000  -0.00138   0.00000
  46 4   N  1S          0.00045   0.00307   0.00299   0.00000  -0.00009
  47        2S          0.00208  -0.00787  -0.00636   0.00000   0.00012
  48        2PX        -0.12315   0.04153  -0.03863  -0.00001   0.00156
  49        2PY         0.08018  -0.01710   0.02913   0.00000   0.00210
  50        2PZ         0.00000   0.00000   0.00000  -0.07200   0.00000
  51        3S          0.00433  -0.02431  -0.00622  -0.00001   0.00220
  52        3PX        -0.11205   0.04274  -0.03935   0.00000   0.00112
  53        3PY         0.06991  -0.00840   0.02642   0.00000   0.00097
  54        3PZ         0.00000   0.00000   0.00000  -0.07103   0.00000
  55        4XX         0.00300   0.00086   0.00039   0.00000  -0.00014
  56        4YY        -0.00465   0.00026  -0.00017   0.00000  -0.00009
  57        4ZZ         0.00053  -0.00021   0.00021   0.00000   0.00001
  58        4XY         0.00307  -0.00018   0.00027   0.00000  -0.00014
  59        4XZ         0.00000   0.00000   0.00000   0.00171   0.00000
  60        4YZ         0.00000   0.00000   0.00000   0.00254   0.00000
  61 5   H  1S         -0.00473  -0.01458   0.00173   0.00000   0.00058
  62        2S          0.00949  -0.03862   0.01215   0.00001   0.00202
  63        3PX         0.00033   0.00086  -0.00030   0.00000  -0.00002
  64        3PY         0.00026   0.00051  -0.00014   0.00000   0.00000
  65        3PZ         0.00000   0.00000   0.00000  -0.00033   0.00000
  66 6   H  1S          0.00746   0.00319   0.00327   0.00335  -0.00073
  67        2S          0.02300  -0.00637   0.00909  -0.01914  -0.00087
  68        3PX        -0.00129   0.00114  -0.00076  -0.00052   0.00005
  69        3PY        -0.00017   0.00016  -0.00003   0.00017   0.00001
  70        3PZ         0.00035   0.00012   0.00018  -0.00015  -0.00003
  71 7   H  1S          0.00745   0.00319   0.00327  -0.00336  -0.00073
  72        2S          0.02297  -0.00637   0.00908   0.01912  -0.00087
  73        3PX        -0.00129   0.00114  -0.00076   0.00052   0.00005
  74        3PY        -0.00017   0.00016  -0.00003  -0.00017   0.00001
  75        3PZ        -0.00035  -0.00012  -0.00018  -0.00015   0.00003
  76 8   H  1S          0.00937  -0.05796  -0.06951   0.00000   0.00456
  77        2S         -0.04848  -0.01819  -0.04022   0.00000   0.00182
  78        3PX         0.00721   0.00339  -0.00437   0.00000  -0.00031
  79        3PY         0.00823  -0.00535  -0.00184   0.00000   0.00043
  80        3PZ         0.00000   0.00000   0.00000   0.00976   0.00000
                          41        42        43        44        45
  41        4YY         0.00037
  42        4ZZ         0.00004   0.00007
  43        4XY         0.00008  -0.00005   0.00065
  44        4XZ         0.00000   0.00000   0.00000   0.00066
  45        4YZ         0.00000   0.00000   0.00000  -0.00002   0.00013
  46 4   N  1S         -0.00032  -0.00008  -0.00046   0.00000   0.00000
  47        2S          0.00035  -0.00029   0.00089   0.00000   0.00000
  48        2PX         0.00400   0.00088   0.00177   0.00000   0.00000
  49        2PY        -0.00773  -0.00044  -0.00120   0.00000   0.00000
  50        2PZ         0.00000   0.00000   0.00000   0.00040   0.00465
  51        3S         -0.00187  -0.00046   0.00149   0.00000   0.00000
  52        3PX         0.00397   0.00076   0.00167   0.00000   0.00000
  53        3PY        -0.00583  -0.00033  -0.00134   0.00000   0.00000
  54        3PZ         0.00000   0.00000   0.00000   0.00105   0.00374
  55        4XX        -0.00014  -0.00001  -0.00003   0.00000   0.00000
  56        4YY         0.00059   0.00004  -0.00008   0.00000   0.00000
  57        4ZZ        -0.00003   0.00000  -0.00001   0.00000   0.00000
  58        4XY        -0.00012  -0.00003  -0.00003   0.00000   0.00000
  59        4XZ         0.00000   0.00000   0.00000  -0.00001  -0.00010
  60        4YZ         0.00000   0.00000   0.00000   0.00009  -0.00030
  61 5   H  1S          0.00092   0.00062   0.00049   0.00000   0.00000
  62        2S         -0.00035   0.00027   0.00008   0.00000   0.00000
  63        3PX        -0.00006   0.00001  -0.00002   0.00000   0.00000
  64        3PY        -0.00005  -0.00002  -0.00003   0.00000   0.00000
  65        3PZ         0.00000   0.00000   0.00000  -0.00001   0.00000
  66 6   H  1S          0.00002  -0.00013   0.00018   0.00005   0.00044
  67        2S         -0.00025  -0.00023  -0.00001   0.00065   0.00117
  68        3PX        -0.00003  -0.00001  -0.00002   0.00005  -0.00002
  69        3PY         0.00000   0.00001   0.00000   0.00001   0.00000
  70        3PZ        -0.00001  -0.00001   0.00001   0.00001   0.00000
  71 7   H  1S          0.00002  -0.00013   0.00018  -0.00005  -0.00044
  72        2S         -0.00025  -0.00023  -0.00001  -0.00065  -0.00117
  73        3PX        -0.00003  -0.00001  -0.00002  -0.00005   0.00002
  74        3PY         0.00000   0.00001   0.00000  -0.00001   0.00000
  75        3PZ         0.00001   0.00001  -0.00001   0.00001   0.00000
  76 8   H  1S          0.00195  -0.00155   0.00589   0.00000   0.00000
  77        2S          0.00195  -0.00031   0.00335   0.00000   0.00000
  78        3PX         0.00010  -0.00007   0.00030   0.00000   0.00000
  79        3PY         0.00003  -0.00014   0.00014   0.00000   0.00000
  80        3PZ         0.00000   0.00000   0.00000  -0.00050  -0.00005
                          46        47        48        49        50
  46 4   N  1S          1.03732
  47        2S         -0.06908   0.20211
  48        2PX        -0.00492   0.00513   0.29819
  49        2PY        -0.01924   0.03194  -0.01680   0.22375
  50        2PZ         0.00000   0.00000   0.00000   0.00000   0.17445
  51        3S         -0.13470   0.26292   0.04506   0.12397   0.00000
  52        3PX        -0.00572   0.00923   0.26531  -0.02765   0.00000
  53        3PY        -0.02348   0.04844  -0.02805   0.16712   0.00000
  54        3PZ         0.00000   0.00000   0.00000   0.00000   0.14192
  55        4XX        -0.00246  -0.00501  -0.00706   0.00026   0.00000
  56        4YY        -0.00187  -0.00536   0.00009  -0.01772   0.00000
  57        4ZZ        -0.00355  -0.00307  -0.00056   0.00017   0.00000
  58        4XY         0.00033  -0.00023  -0.01256  -0.00171   0.00000
  59        4XZ         0.00000   0.00000   0.00000   0.00000  -0.00371
  60        4YZ         0.00000   0.00000   0.00000   0.00000  -0.01090
  61 5   H  1S          0.00148  -0.00444   0.01941   0.00155   0.00001
  62        2S         -0.00406   0.00758  -0.01106   0.02980   0.00001
  63        3PX        -0.00004  -0.00005  -0.00089   0.00110   0.00000
  64        3PY        -0.00004   0.00007  -0.00075   0.00039   0.00000
  65        3PZ         0.00000   0.00000   0.00000   0.00000  -0.00048
  66 6   H  1S         -0.00127   0.00383  -0.01206  -0.00422   0.02310
  67        2S         -0.00112   0.00389  -0.04677  -0.00623   0.05058
  68        3PX         0.00017  -0.00042   0.00206   0.00041  -0.00047
  69        3PY         0.00013  -0.00025   0.00086   0.00047   0.00024
  70        3PZ        -0.00005   0.00017  -0.00066  -0.00002   0.00014
  71 7   H  1S         -0.00127   0.00383  -0.01204  -0.00422  -0.02311
  72        2S         -0.00112   0.00389  -0.04671  -0.00624  -0.05059
  73        3PX         0.00017  -0.00042   0.00205   0.00041   0.00047
  74        3PY         0.00013  -0.00025   0.00086   0.00047  -0.00024
  75        3PZ         0.00005  -0.00017   0.00066   0.00002   0.00014
  76 8   H  1S         -0.00259   0.00591   0.01542  -0.02423   0.00000
  77        2S         -0.00009   0.00058   0.04293  -0.03725   0.00000
  78        3PX         0.00002   0.00007   0.00006  -0.00135   0.00000
  79        3PY        -0.00004   0.00008  -0.00112   0.00181   0.00000
  80        3PZ         0.00000   0.00000   0.00000   0.00000  -0.00259
                          51        52        53        54        55
  51        3S          0.38329
  52        3PX         0.04039   0.23798
  53        3PY         0.11968  -0.03327   0.12945
  54        3PZ         0.00000   0.00000   0.00000   0.11628
  55        4XX        -0.00710  -0.00629   0.00001   0.00000   0.00034
  56        4YY        -0.01336   0.00090  -0.01346   0.00000   0.00007
  57        4ZZ        -0.00361  -0.00064  -0.00025   0.00000   0.00010
  58        4XY        -0.00296  -0.01078  -0.00051   0.00000   0.00033
  59        4XZ         0.00000   0.00000   0.00000  -0.00301   0.00000
  60        4YZ         0.00000   0.00000   0.00000  -0.00874   0.00000
  61 5   H  1S          0.00263   0.01651  -0.00168   0.00001  -0.00023
  62        2S          0.02448  -0.01292   0.02147   0.00001  -0.00006
  63        3PX         0.00018  -0.00061   0.00091   0.00000   0.00007
  64        3PY        -0.00005  -0.00054   0.00041   0.00000   0.00003
  65        3PZ         0.00000   0.00000   0.00000  -0.00046   0.00000
  66 6   H  1S          0.00105  -0.01256  -0.00249   0.02007  -0.00005
  67        2S         -0.00473  -0.04373  -0.00209   0.04287   0.00062
  68        3PX        -0.00021   0.00202   0.00021  -0.00030  -0.00001
  69        3PY         0.00006   0.00078   0.00026   0.00025   0.00000
  70        3PZ         0.00010  -0.00069   0.00001   0.00013   0.00000
  71 7   H  1S          0.00105  -0.01254  -0.00249  -0.02008  -0.00005
  72        2S         -0.00473  -0.04368  -0.00210  -0.04287   0.00062
  73        3PX        -0.00021   0.00202   0.00021   0.00030  -0.00001
  74        3PY         0.00006   0.00078   0.00026  -0.00025   0.00000
  75        3PZ        -0.00010   0.00069  -0.00001   0.00013   0.00000
  76 8   H  1S          0.00868   0.01611  -0.02417   0.00000  -0.00081
  77        2S         -0.00312   0.04034  -0.03235   0.00000  -0.00115
  78        3PX        -0.00051   0.00039  -0.00107   0.00000   0.00004
  79        3PY         0.00107  -0.00106   0.00105   0.00000  -0.00002
  80        3PZ         0.00000   0.00000   0.00000  -0.00264   0.00000
                          56        57        58        59        60
  56        4YY         0.00152
  57        4ZZ         0.00005   0.00007
  58        4XY         0.00014   0.00001   0.00063
  59        4XZ         0.00000   0.00000   0.00000   0.00008
  60        4YZ         0.00000   0.00000   0.00000   0.00023   0.00070
  61 5   H  1S         -0.00006  -0.00030  -0.00101   0.00000   0.00000
  62        2S         -0.00208  -0.00026  -0.00031   0.00000   0.00000
  63        3PX        -0.00011  -0.00001   0.00009   0.00000   0.00000
  64        3PY        -0.00003   0.00000   0.00006   0.00000   0.00000
  65        3PZ         0.00000   0.00000   0.00000  -0.00001   0.00001
  66 6   H  1S          0.00035   0.00021   0.00005  -0.00012  -0.00111
  67        2S          0.00075   0.00025   0.00138  -0.00076  -0.00277
  68        3PX        -0.00005   0.00000  -0.00003   0.00001   0.00004
  69        3PY        -0.00004  -0.00001  -0.00003   0.00001   0.00000
  70        3PZ         0.00000   0.00001   0.00000   0.00000  -0.00001
  71 7   H  1S          0.00035   0.00021   0.00005   0.00012   0.00111
  72        2S          0.00075   0.00025   0.00138   0.00076   0.00277
  73        3PX        -0.00005   0.00000  -0.00003  -0.00001  -0.00004
  74        3PY        -0.00004  -0.00001  -0.00003  -0.00001   0.00000
  75        3PZ         0.00000  -0.00001   0.00000   0.00000  -0.00001
  76 8   H  1S          0.00088   0.00003  -0.00053   0.00000   0.00000
  77        2S          0.00215  -0.00010  -0.00135   0.00000   0.00000
  78        3PX         0.00002   0.00000   0.00004   0.00000   0.00000
  79        3PY        -0.00011   0.00002  -0.00003   0.00000   0.00000
  80        3PZ         0.00000   0.00000   0.00000   0.00006   0.00008
                          61        62        63        64        65
  61 5   H  1S          0.10955
  62        2S          0.08099   0.07231
  63        3PX         0.00209   0.00139   0.00012
  64        3PY        -0.00306  -0.00187  -0.00003   0.00016
  65        3PZ         0.00000   0.00000   0.00000   0.00000   0.00013
  66 6   H  1S         -0.01301  -0.01941  -0.00069  -0.00151  -0.00279
  67        2S         -0.02395  -0.01856  -0.00104  -0.00056  -0.00253
  68        3PX        -0.00163  -0.00174   0.00003   0.00006  -0.00004
  69        3PY         0.00262   0.00168   0.00007  -0.00009  -0.00009
  70        3PZ        -0.00030  -0.00082  -0.00002  -0.00010  -0.00001
  71 7   H  1S         -0.01301  -0.01941  -0.00069  -0.00151   0.00279
  72        2S         -0.02395  -0.01857  -0.00104  -0.00056   0.00253
  73        3PX        -0.00163  -0.00174   0.00003   0.00006   0.00004
  74        3PY         0.00262   0.00168   0.00007  -0.00009   0.00009
  75        3PZ         0.00030   0.00082   0.00002   0.00010  -0.00001
  76 8   H  1S          0.00455   0.00518  -0.00035  -0.00019   0.00000
  77        2S          0.00169  -0.00432  -0.00041  -0.00018   0.00000
  78        3PX         0.00024  -0.00039   0.00003   0.00001   0.00000
  79        3PY         0.00036   0.00120  -0.00002   0.00000   0.00000
  80        3PZ         0.00000   0.00000   0.00000   0.00000   0.00000
                          66        67        68        69        70
  66 6   H  1S          0.10891
  67        2S          0.09045   0.09172
  68        3PX         0.00081   0.00016   0.00013
  69        3PY         0.00208   0.00125   0.00002   0.00015
  70        3PZ         0.00306   0.00208   0.00001   0.00003   0.00017
  71 7   H  1S         -0.01116  -0.02268  -0.00076  -0.00191   0.00261
  72        2S         -0.02268  -0.02580  -0.00113  -0.00235   0.00162
  73        3PX        -0.00076  -0.00113   0.00009  -0.00004   0.00000
  74        3PY        -0.00191  -0.00235  -0.00004   0.00001   0.00001
  75        3PZ        -0.00261  -0.00161   0.00000  -0.00001  -0.00017
  76 8   H  1S         -0.00162  -0.00208   0.00002  -0.00009  -0.00009
  77        2S         -0.00081  -0.00487   0.00022  -0.00005  -0.00007
  78        3PX        -0.00035  -0.00029   0.00001   0.00000  -0.00002
  79        3PY        -0.00026   0.00003  -0.00001   0.00000  -0.00001
  80        3PZ        -0.00003  -0.00088  -0.00003   0.00000  -0.00001
                          71        72        73        74        75
  71 7   H  1S          0.10891
  72        2S          0.09044   0.09169
  73        3PX         0.00081   0.00016   0.00013
  74        3PY         0.00208   0.00125   0.00002   0.00015
  75        3PZ        -0.00307  -0.00208  -0.00001  -0.00003   0.00017
  76 8   H  1S         -0.00161  -0.00207   0.00002  -0.00009   0.00009
  77        2S         -0.00080  -0.00486   0.00022  -0.00005   0.00007
  78        3PX        -0.00035  -0.00029   0.00001   0.00000   0.00002
  79        3PY        -0.00026   0.00003  -0.00001   0.00000   0.00001
  80        3PZ         0.00003   0.00088   0.00003   0.00000  -0.00001
                          76        77        78        79        80
  76 8   H  1S          0.10680
  77        2S          0.04431   0.02912
  78        3PX         0.00448   0.00143   0.00048
  79        3PY         0.00686   0.00145   0.00031   0.00070
  80        3PZ         0.00000   0.00000   0.00000   0.00000   0.00041
    Full Mulliken population analysis:
                           1         2         3         4         5
   1 1   C  1S          2.05701
   2        2S         -0.01571   0.29204
   3        2PX         0.00000   0.00000   0.38556
   4        2PY         0.00000   0.00000   0.00000   0.37954
   5        2PZ         0.00000   0.00000   0.00000   0.00000   0.37246
   6        3S         -0.03751   0.25374   0.00000   0.00000   0.00000
   7        3PX         0.00000   0.00000   0.11800   0.00000   0.00000
   8        3PY         0.00000   0.00000   0.00000   0.11074   0.00000
   9        3PZ         0.00000   0.00000   0.00000   0.00000   0.10241
  10        4XX        -0.00079   0.00160   0.00000   0.00000   0.00000
  11        4YY        -0.00063  -0.00044   0.00000   0.00000   0.00000
  12        4ZZ        -0.00067   0.00007   0.00000   0.00000   0.00000
  13        4XY         0.00000   0.00000   0.00000   0.00000   0.00000
  14        4XZ         0.00000   0.00000   0.00000   0.00000   0.00000
  15        4YZ         0.00000   0.00000   0.00000   0.00000   0.00000
  16 2   C  1S          0.00000  -0.00020  -0.00132  -0.00008   0.00000
  17        2S         -0.00019   0.00588   0.02673   0.00165   0.00000
  18        2PX        -0.00109   0.02083   0.06464   0.00506   0.00000
  19        2PY        -0.00009   0.00171   0.00691  -0.00040   0.00000
  20        2PZ         0.00000   0.00000   0.00000   0.00000   0.00254
  21        3S         -0.00014   0.00725   0.03127   0.00191   0.00000
  22        3PX         0.00143  -0.00600   0.00492  -0.00020   0.00000
  23        3PY        -0.00030   0.00293   0.00458  -0.00613   0.00000
  24        3PZ         0.00000   0.00000   0.00000   0.00000  -0.00070
  25        4XX        -0.00016   0.00324   0.00374   0.00081   0.00000
  26        4YY         0.00000  -0.00039  -0.00093   0.00003   0.00000
  27        4ZZ         0.00000  -0.00005  -0.00005  -0.00001   0.00000
  28        4XY        -0.00004   0.00064   0.00180   0.00043   0.00000
  29        4XZ         0.00000   0.00000   0.00000   0.00000   0.00119
  30        4YZ         0.00000   0.00000   0.00000   0.00000   0.00011
  31 3   O  1S          0.00000   0.00000   0.00000   0.00000   0.00000
  32        2S          0.00000  -0.00001  -0.00005   0.00000   0.00000
  33        2PX         0.00000  -0.00007  -0.00030   0.00000   0.00000
  34        2PY         0.00000  -0.00001  -0.00005   0.00000   0.00000
  35        2PZ         0.00000   0.00000   0.00000   0.00000  -0.00001
  36        3S          0.00002  -0.00069  -0.00213   0.00023   0.00000
  37        3PX         0.00012  -0.00351  -0.00839   0.00021   0.00000
  38        3PY         0.00002  -0.00040  -0.00147  -0.00007   0.00000
  39        3PZ         0.00000   0.00000   0.00000   0.00000  -0.00035
  40        4XX         0.00000   0.00000   0.00003   0.00000   0.00000
  41        4YY         0.00000   0.00000  -0.00001   0.00000   0.00000
  42        4ZZ         0.00000   0.00000   0.00000   0.00000   0.00000
  43        4XY         0.00000   0.00000   0.00002   0.00000   0.00000
  44        4XZ         0.00000   0.00000   0.00000   0.00000   0.00000
  45        4YZ         0.00000   0.00000   0.00000   0.00000   0.00000
  46 4   N  1S          0.00000   0.00000   0.00000   0.00000   0.00000
  47        2S          0.00000  -0.00002  -0.00006  -0.00005   0.00000
  48        2PX         0.00000  -0.00012  -0.00028  -0.00015   0.00000
  49        2PY         0.00000  -0.00002  -0.00015  -0.00001   0.00000
  50        2PZ         0.00000   0.00000   0.00000   0.00000  -0.00001
  51        3S          0.00001  -0.00027  -0.00056  -0.00055   0.00000
  52        3PX         0.00024  -0.00468  -0.00563  -0.00354   0.00000
  53        3PY         0.00004  -0.00045  -0.00246   0.00001   0.00000
  54        3PZ         0.00000   0.00000   0.00000   0.00000  -0.00055
  55        4XX         0.00000   0.00000   0.00001   0.00001   0.00000
  56        4YY         0.00000  -0.00001  -0.00003   0.00000   0.00000
  57        4ZZ         0.00000   0.00000   0.00000   0.00000   0.00000
  58        4XY         0.00000   0.00000   0.00002   0.00000   0.00000
  59        4XZ         0.00000   0.00000   0.00000   0.00000   0.00000
  60        4YZ         0.00000   0.00000   0.00000   0.00000   0.00000
  61 5   H  1S         -0.00182   0.02895   0.03143   0.06331   0.00000
  62        2S         -0.00082   0.01349   0.02051   0.03678   0.00000
  63        3PX        -0.00008   0.00082  -0.00011   0.00167   0.00000
  64        3PY        -0.00016   0.00153   0.00189   0.00019   0.00000
  65        3PZ         0.00000   0.00000   0.00000   0.00000   0.00148
  66 6   H  1S         -0.00163   0.02507   0.00467   0.02947   0.06090
  67        2S         -0.00016   0.00611   0.00380   0.01958   0.03977
  68        3PX        -0.00001   0.00016   0.00107   0.00010   0.00027
  69        3PY        -0.00008   0.00082   0.00011  -0.00005   0.00162
  70        3PZ        -0.00015   0.00148   0.00030   0.00170   0.00014
  71 7   H  1S         -0.00163   0.02507   0.00468   0.02939   0.06097
  72        2S         -0.00017   0.00611   0.00381   0.01953   0.03982
  73        3PX        -0.00001   0.00016   0.00107   0.00010   0.00028
  74        3PY        -0.00008   0.00082   0.00011  -0.00005   0.00162
  75        3PZ        -0.00015   0.00148   0.00030   0.00169   0.00014
  76 8   H  1S          0.00000  -0.00002  -0.00008  -0.00001   0.00000
  77        2S          0.00000  -0.00001  -0.00014  -0.00001   0.00000
  78        3PX         0.00000   0.00000   0.00000   0.00001   0.00000
  79        3PY         0.00000   0.00000   0.00000   0.00000   0.00000
  80        3PZ         0.00000   0.00000   0.00000   0.00000   0.00000
                           6         7         8         9        10
   6        3S          0.45312
   7        3PX         0.00000   0.12676
   8        3PY         0.00000   0.00000   0.10484
   9        3PZ         0.00000   0.00000   0.00000   0.09143
  10        4XX         0.00229   0.00000   0.00000   0.00000   0.00098
  11        4YY        -0.00152   0.00000   0.00000   0.00000  -0.00008
  12        4ZZ         0.00036   0.00000   0.00000   0.00000  -0.00012
  13        4XY         0.00000   0.00000   0.00000   0.00000   0.00000
  14        4XZ         0.00000   0.00000   0.00000   0.00000   0.00000
  15        4YZ         0.00000   0.00000   0.00000   0.00000   0.00000
  16 2   C  1S          0.00046  -0.00081  -0.00015   0.00000  -0.00014
  17        2S         -0.00113   0.01264   0.00225   0.00000   0.00268
  18        2PX         0.03303   0.03155   0.00377   0.00000   0.00278
  19        2PY         0.00462   0.00774   0.00222   0.00000   0.00061
  20        2PZ         0.00000   0.00000   0.00000   0.00678   0.00000
  21        3S          0.00719   0.02268   0.00370   0.00000   0.00266
  22        3PX        -0.04527  -0.00077  -0.00155   0.00000   0.00092
  23        3PY         0.00867   0.00470  -0.01012   0.00000   0.00039
  24        3PZ         0.00000   0.00000   0.00000   0.00563   0.00000
  25        4XX         0.00781   0.00359   0.00082   0.00000   0.00019
  26        4YY        -0.00341  -0.00196  -0.00036   0.00000  -0.00001
  27        4ZZ         0.00018   0.00011   0.00004   0.00000  -0.00002
  28        4XY         0.00095   0.00044   0.00003   0.00000   0.00001
  29        4XZ         0.00000   0.00000   0.00000   0.00083   0.00000
  30        4YZ         0.00000   0.00000   0.00000  -0.00003   0.00000
  31 3   O  1S          0.00005   0.00007   0.00000   0.00000   0.00000
  32        2S         -0.00109  -0.00146   0.00000   0.00000   0.00000
  33        2PX        -0.00426  -0.00497   0.00122   0.00000   0.00001
  34        2PY        -0.00067  -0.00102  -0.00011   0.00000   0.00000
  35        2PZ         0.00000   0.00000   0.00000  -0.00094   0.00000
  36        3S         -0.01127  -0.00786   0.00122   0.00000  -0.00008
  37        3PX        -0.02698  -0.02071   0.00521   0.00000   0.00016
  38        3PY        -0.00441  -0.00464  -0.00110   0.00000   0.00004
  39        3PZ         0.00000   0.00000   0.00000  -0.00531   0.00000
  40        4XX        -0.00024   0.00008   0.00014   0.00000   0.00001
  41        4YY         0.00003  -0.00033  -0.00003   0.00000   0.00000
  42        4ZZ         0.00004  -0.00003  -0.00003   0.00000   0.00000
  43        4XY        -0.00005   0.00001   0.00000   0.00000   0.00000
  44        4XZ         0.00000   0.00000   0.00000  -0.00005   0.00000
  45        4YZ         0.00000   0.00000   0.00000   0.00001   0.00000
  46 4   N  1S          0.00002  -0.00005   0.00009   0.00000   0.00000
  47        2S         -0.00044   0.00056  -0.00174   0.00000   0.00000
  48        2PX        -0.00858  -0.00499  -0.00269   0.00000   0.00000
  49        2PY        -0.00098  -0.00486   0.00061   0.00000   0.00000
  50        2PZ         0.00000   0.00000   0.00000   0.00037   0.00000
  51        3S          0.00485   0.00954  -0.00554   0.00000  -0.00004
  52        3PX        -0.04947  -0.01633  -0.01176   0.00000  -0.00015
  53        3PY        -0.00222  -0.01480   0.00160   0.00000  -0.00004
  54        3PZ         0.00000   0.00000   0.00000   0.00181   0.00000
  55        4XX        -0.00021  -0.00007   0.00007   0.00000   0.00000
  56        4YY        -0.00028  -0.00087   0.00008   0.00000   0.00000
  57        4ZZ        -0.00002  -0.00002  -0.00003   0.00000   0.00000
  58        4XY        -0.00032  -0.00011  -0.00001   0.00000   0.00000
  59        4XZ         0.00000   0.00000   0.00000   0.00003   0.00000
  60        4YZ         0.00000   0.00000   0.00000   0.00003   0.00000
  61 5   H  1S          0.04001   0.02196   0.04353   0.00000   0.00025
  62        2S          0.00310   0.02216   0.03548   0.00000   0.00024
  63        3PX         0.00051   0.00018   0.00043   0.00000   0.00001
  64        3PY         0.00085   0.00047  -0.00002   0.00000  -0.00006
  65        3PZ         0.00000   0.00000   0.00000   0.00097   0.00000
  66 6   H  1S          0.02751   0.00344   0.02128   0.04037  -0.00065
  67        2S         -0.02351   0.00539   0.02294   0.03804  -0.00181
  68        3PX         0.00019   0.00092   0.00001   0.00007  -0.00001
  69        3PY         0.00055   0.00002   0.00029   0.00039   0.00001
  70        3PZ         0.00074   0.00008   0.00044  -0.00001  -0.00003
  71 7   H  1S          0.02752   0.00345   0.02123   0.04041  -0.00065
  72        2S         -0.02347   0.00539   0.02289   0.03809  -0.00181
  73        3PX         0.00019   0.00092   0.00001   0.00007  -0.00001
  74        3PY         0.00055   0.00002   0.00029   0.00039   0.00001
  75        3PZ         0.00074   0.00008   0.00044  -0.00001  -0.00003
  76 8   H  1S         -0.00028  -0.00080   0.00053   0.00000   0.00000
  77        2S          0.00521   0.00013  -0.00052   0.00000  -0.00004
  78        3PX        -0.00006  -0.00004   0.00010   0.00000   0.00000
  79        3PY        -0.00009  -0.00005   0.00004   0.00000   0.00000
  80        3PZ         0.00000   0.00000   0.00000  -0.00003   0.00000
                          11        12        13        14        15
  11        4YY         0.00022
  12        4ZZ         0.00002   0.00038
  13        4XY         0.00000   0.00000   0.00079
  14        4XZ         0.00000   0.00000   0.00000   0.00052
  15        4YZ         0.00000   0.00000   0.00000   0.00000   0.00076
  16 2   C  1S          0.00000   0.00000  -0.00002   0.00000   0.00000
  17        2S         -0.00015  -0.00012   0.00028   0.00000   0.00000
  18        2PX        -0.00040  -0.00035   0.00037   0.00000   0.00000
  19        2PY         0.00002  -0.00003   0.00061   0.00000   0.00000
  20        2PZ         0.00000   0.00000   0.00000   0.00123   0.00010
  21        3S         -0.00054  -0.00037   0.00012   0.00000   0.00000
  22        3PX         0.00007  -0.00045   0.00013   0.00000   0.00000
  23        3PY        -0.00008  -0.00009   0.00032   0.00000   0.00000
  24        3PZ         0.00000   0.00000   0.00000   0.00113   0.00013
  25        4XX        -0.00004  -0.00001  -0.00008   0.00000   0.00000
  26        4YY         0.00001   0.00000   0.00000   0.00000   0.00000
  27        4ZZ         0.00000   0.00000   0.00000   0.00000   0.00000
  28        4XY         0.00001   0.00001  -0.00001   0.00000   0.00000
  29        4XZ         0.00000   0.00000   0.00000  -0.00007  -0.00003
  30        4YZ         0.00000   0.00000   0.00000  -0.00003   0.00001
  31 3   O  1S          0.00000   0.00000   0.00000   0.00000   0.00000
  32        2S          0.00000   0.00000   0.00000   0.00000   0.00000
  33        2PX         0.00000   0.00000   0.00001   0.00000   0.00000
  34        2PY         0.00000   0.00000   0.00000   0.00000   0.00000
  35        2PZ         0.00000   0.00000   0.00000   0.00000   0.00000
  36        3S          0.00003   0.00001  -0.00005   0.00000   0.00000
  37        3PX         0.00002  -0.00006   0.00016   0.00000   0.00000
  38        3PY         0.00000   0.00000   0.00000   0.00000   0.00000
  39        3PZ         0.00000   0.00000   0.00000   0.00002   0.00001
  40        4XX         0.00000   0.00000   0.00000   0.00000   0.00000
  41        4YY         0.00000   0.00000   0.00000   0.00000   0.00000
  42        4ZZ         0.00000   0.00000   0.00000   0.00000   0.00000
  43        4XY         0.00000   0.00000   0.00000   0.00000   0.00000
  44        4XZ         0.00000   0.00000   0.00000   0.00000   0.00000
  45        4YZ         0.00000   0.00000   0.00000   0.00000   0.00000
  46 4   N  1S          0.00000   0.00000   0.00000   0.00000   0.00000
  47        2S          0.00000   0.00000   0.00000   0.00000   0.00000
  48        2PX         0.00001   0.00000   0.00004   0.00000   0.00000
  49        2PY         0.00000   0.00000   0.00001   0.00000   0.00000
  50        2PZ         0.00000   0.00000   0.00000   0.00000   0.00000
  51        3S          0.00000   0.00000  -0.00008   0.00000   0.00000
  52        3PX         0.00033  -0.00002   0.00060   0.00000   0.00000
  53        3PY         0.00005   0.00004   0.00009   0.00000   0.00000
  54        3PZ         0.00000   0.00000   0.00000   0.00019   0.00011
  55        4XX         0.00000   0.00000   0.00000   0.00000   0.00000
  56        4YY         0.00000   0.00000   0.00000   0.00000   0.00000
  57        4ZZ         0.00000   0.00000   0.00000   0.00000   0.00000
  58        4XY         0.00000   0.00000   0.00001   0.00000   0.00000
  59        4XZ         0.00000   0.00000   0.00000   0.00000   0.00000
  60        4YZ         0.00000   0.00000   0.00000   0.00000   0.00000
  61 5   H  1S          0.00102  -0.00057   0.00272   0.00000   0.00000
  62        2S          0.00105  -0.00159   0.00053   0.00000   0.00000
  63        3PX        -0.00001  -0.00002   0.00001   0.00000   0.00000
  64        3PY         0.00002   0.00000   0.00006   0.00000   0.00000
  65        3PZ         0.00000   0.00000   0.00000   0.00003  -0.00010
  66 6   H  1S          0.00020   0.00155   0.00023   0.00044   0.00241
  67        2S          0.00050   0.00156   0.00008   0.00014   0.00059
  68        3PX        -0.00001   0.00000  -0.00001   0.00000   0.00001
  69        3PY         0.00000  -0.00003   0.00000   0.00001   0.00002
  70        3PZ         0.00001   0.00004   0.00002   0.00000   0.00001
  71 7   H  1S          0.00019   0.00155   0.00023   0.00045   0.00241
  72        2S          0.00050   0.00157   0.00008   0.00014   0.00059
  73        3PX        -0.00001   0.00000  -0.00001   0.00000   0.00001
  74        3PY         0.00000  -0.00003   0.00000   0.00001   0.00002
  75        3PZ         0.00001   0.00004   0.00002   0.00000   0.00001
  76 8   H  1S          0.00000   0.00000   0.00001   0.00000   0.00000
  77        2S          0.00000   0.00001   0.00005   0.00000   0.00000
  78        3PX         0.00000   0.00000   0.00000   0.00000   0.00000
  79        3PY         0.00000   0.00000   0.00000   0.00000   0.00000
  80        3PZ         0.00000   0.00000   0.00000   0.00000   0.00000
                          16        17        18        19        20
  16 2   C  1S          2.05440
  17        2S         -0.01793   0.33012
  18        2PX         0.00000   0.00000   0.35233
  19        2PY         0.00000   0.00000   0.00000   0.37225
  20        2PZ         0.00000   0.00000   0.00000   0.00000   0.34852
  21        3S         -0.02427   0.18665   0.00000   0.00000   0.00000
  22        3PX         0.00000   0.00000   0.03049   0.00000   0.00000
  23        3PY         0.00000   0.00000   0.00000   0.02746   0.00000
  24        3PZ         0.00000   0.00000   0.00000   0.00000   0.13164
  25        4XX        -0.00082   0.00095   0.00000   0.00000   0.00000
  26        4YY        -0.00069  -0.00007   0.00000   0.00000   0.00000
  27        4ZZ        -0.00053  -0.00542   0.00000   0.00000   0.00000
  28        4XY         0.00000   0.00000   0.00000   0.00000   0.00000
  29        4XZ         0.00000   0.00000   0.00000   0.00000   0.00000
  30        4YZ         0.00000   0.00000   0.00000   0.00000   0.00000
  31 3   O  1S          0.00000  -0.00003  -0.00029  -0.00047   0.00000
  32        2S         -0.00003   0.00092   0.00600   0.00893   0.00000
  33        2PX        -0.00018   0.00800   0.00601   0.02066   0.00000
  34        2PY        -0.00027   0.01162   0.01878   0.02025   0.00000
  35        2PZ         0.00000   0.00000   0.00000   0.00000   0.00373
  36        3S          0.00084  -0.01831   0.00251   0.00804   0.00000
  37        3PX        -0.00171   0.01446  -0.00049   0.02739   0.00000
  38        3PY        -0.00275   0.02060   0.02390   0.01240   0.00000
  39        3PZ         0.00000   0.00000   0.00000   0.00000   0.00473
  40        4XX        -0.00008   0.00144   0.00012   0.00372   0.00000
  41        4YY        -0.00011   0.00132   0.00224  -0.00136   0.00000
  42        4ZZ         0.00000  -0.00002   0.00007  -0.00005   0.00000
  43        4XY        -0.00023   0.00184   0.00044   0.00186   0.00000
  44        4XZ         0.00000   0.00000   0.00000   0.00000   0.00086
  45        4YZ         0.00000   0.00000   0.00000   0.00000   0.00116
  46 4   N  1S          0.00000  -0.00022  -0.00021  -0.00157   0.00000
  47        2S         -0.00022   0.00472   0.00325   0.02367   0.00000
  48        2PX        -0.00014   0.00310   0.00353   0.01705   0.00000
  49        2PY        -0.00199   0.04158   0.01684   0.06704   0.00000
  50        2PZ         0.00000   0.00000   0.00000   0.00000   0.02696
  51        3S          0.00103  -0.01964   0.00090  -0.00121   0.00000
  52        3PX        -0.00020   0.00290   0.01037   0.01671   0.00000
  53        3PY        -0.00776   0.07213   0.01601   0.03297   0.00000
  54        3PZ         0.00000   0.00000   0.00000   0.00000   0.06051
  55        4XX         0.00000  -0.00001   0.00006   0.00037   0.00000
  56        4YY        -0.00050   0.00577   0.00278   0.00614   0.00000
  57        4ZZ         0.00000  -0.00014  -0.00002  -0.00030   0.00000
  58        4XY        -0.00009   0.00083   0.00081   0.00194   0.00000
  59        4XZ         0.00000   0.00000   0.00000   0.00000   0.00041
  60        4YZ         0.00000   0.00000   0.00000   0.00000   0.00397
  61 5   H  1S          0.00000  -0.00011  -0.00034  -0.00001   0.00000
  62        2S          0.00021  -0.00365  -0.00339  -0.00069   0.00000
  63        3PX         0.00000   0.00001   0.00008   0.00000   0.00000
  64        3PY         0.00000   0.00000  -0.00001   0.00000   0.00000
  65        3PZ         0.00000   0.00000   0.00000   0.00000   0.00000
  66 6   H  1S          0.00000  -0.00012  -0.00031  -0.00010  -0.00006
  67        2S          0.00014  -0.00209  -0.00379  -0.00195  -0.00244
  68        3PX         0.00000   0.00002   0.00006   0.00002   0.00001
  69        3PY         0.00000   0.00000   0.00001   0.00000   0.00000
  70        3PZ         0.00000   0.00000   0.00000   0.00000   0.00000
  71 7   H  1S          0.00000  -0.00012  -0.00031  -0.00010  -0.00006
  72        2S          0.00014  -0.00209  -0.00379  -0.00194  -0.00244
  73        3PX         0.00000   0.00002   0.00006   0.00002   0.00001
  74        3PY         0.00000   0.00000   0.00001   0.00000   0.00000
  75        3PZ         0.00000   0.00000   0.00000   0.00000   0.00000
  76 8   H  1S          0.00000  -0.00036  -0.00007  -0.00149   0.00000
  77        2S          0.00004  -0.00023   0.00033  -0.00597   0.00000
  78        3PX         0.00000   0.00001  -0.00001   0.00007   0.00000
  79        3PY         0.00000   0.00000   0.00001   0.00025   0.00000
  80        3PZ         0.00000   0.00000   0.00000   0.00000   0.00001
                          21        22        23        24        25
  21        3S          0.18627
  22        3PX         0.00000   0.06043
  23        3PY         0.00000   0.00000   0.03222
  24        3PZ         0.00000   0.00000   0.00000   0.15603
  25        4XX         0.00318   0.00000   0.00000   0.00000   0.00253
  26        4YY        -0.00456   0.00000   0.00000   0.00000  -0.00062
  27        4ZZ        -0.00206   0.00000   0.00000   0.00000   0.00002
  28        4XY         0.00000   0.00000   0.00000   0.00000   0.00000
  29        4XZ         0.00000   0.00000   0.00000   0.00000   0.00000
  30        4YZ         0.00000   0.00000   0.00000   0.00000   0.00000
  31 3   O  1S          0.00069   0.00059   0.00121   0.00000  -0.00001
  32        2S         -0.00970  -0.00729  -0.01315   0.00000   0.00024
  33        2PX         0.00053   0.00154   0.00233   0.00000  -0.00089
  34        2PY         0.00764  -0.00188   0.00024   0.00000   0.00073
  35        2PZ         0.00000   0.00000   0.00000   0.00396   0.00000
  36        3S         -0.04908  -0.02726  -0.04384   0.00000  -0.00028
  37        3PX        -0.00466   0.01024   0.00034   0.00000  -0.00283
  38        3PY         0.01010  -0.00699   0.00036   0.00000  -0.00008
  39        3PZ         0.00000   0.00000   0.00000   0.00014   0.00000
  40        4XX         0.00088  -0.00051   0.00124   0.00000  -0.00005
  41        4YY         0.00142   0.00101   0.00037   0.00000   0.00002
  42        4ZZ         0.00013   0.00027   0.00017   0.00000   0.00001
  43        4XY         0.00054   0.00006   0.00001   0.00000   0.00005
  44        4XZ         0.00000   0.00000   0.00000   0.00046   0.00000
  45        4YZ         0.00000   0.00000   0.00000   0.00075   0.00000
  46 4   N  1S          0.00102  -0.00019  -0.00061   0.00000   0.00001
  47        2S         -0.00938   0.00214   0.01182   0.00000  -0.00055
  48        2PX        -0.00043   0.02563   0.01004   0.00000   0.00037
  49        2PY         0.03088   0.00245  -0.00188   0.00000  -0.00029
  50        2PZ         0.00000   0.00000   0.00000   0.03920   0.00000
  51        3S         -0.06280   0.00627   0.01251   0.00000  -0.00131
  52        3PX        -0.00457   0.07326   0.01857   0.00000  -0.00155
  53        3PY         0.06671   0.00503  -0.00067   0.00000  -0.00022
  54        3PZ         0.00000   0.00000   0.00000   0.09379   0.00000
  55        4XX         0.00020  -0.00037   0.00079   0.00000  -0.00001
  56        4YY         0.00527   0.00020  -0.00056   0.00000  -0.00005
  57        4ZZ        -0.00013  -0.00007  -0.00001   0.00000   0.00000
  58        4XY         0.00019   0.00098   0.00011   0.00000   0.00003
  59        4XZ         0.00000   0.00000   0.00000   0.00023   0.00000
  60        4YZ         0.00000   0.00000   0.00000   0.00226   0.00000
  61 5   H  1S         -0.00184  -0.00326  -0.00061   0.00000   0.00006
  62        2S         -0.01184   0.00109   0.00004   0.00000  -0.00012
  63        3PX         0.00008   0.00013  -0.00002   0.00000   0.00000
  64        3PY        -0.00003  -0.00004   0.00000   0.00000   0.00000
  65        3PZ         0.00000   0.00000   0.00000  -0.00001   0.00000
  66 6   H  1S         -0.00182  -0.00049  -0.00132  -0.00177   0.00000
  67        2S         -0.00705   0.00533  -0.00557  -0.00905  -0.00062
  68        3PX         0.00014  -0.00001   0.00009   0.00006   0.00000
  69        3PY         0.00000  -0.00003   0.00000   0.00000   0.00000
  70        3PZ        -0.00003  -0.00001  -0.00002   0.00000   0.00000
  71 7   H  1S         -0.00182  -0.00050  -0.00132  -0.00178   0.00000
  72        2S         -0.00705   0.00532  -0.00556  -0.00905  -0.00062
  73        3PX         0.00014  -0.00001   0.00009   0.00006   0.00000
  74        3PY         0.00000  -0.00003   0.00000   0.00000   0.00000
  75        3PZ        -0.00003  -0.00001  -0.00002   0.00000   0.00000
  76 8   H  1S         -0.00425  -0.00021  -0.00095   0.00000  -0.00005
  77        2S          0.00081   0.00211   0.00703   0.00000  -0.00014
  78        3PX         0.00005   0.00001   0.00006   0.00000   0.00000
  79        3PY        -0.00029  -0.00010  -0.00017   0.00000   0.00000
  80        3PZ         0.00000   0.00000   0.00000   0.00003   0.00000
                          26        27        28        29        30
  26        4YY         0.00296
  27        4ZZ        -0.00017   0.00045
  28        4XY         0.00000   0.00000   0.00480
  29        4XZ         0.00000   0.00000   0.00000   0.00068
  30        4YZ         0.00000   0.00000   0.00000   0.00000   0.00217
  31 3   O  1S         -0.00008   0.00000  -0.00021   0.00000   0.00000
  32        2S          0.00163  -0.00015   0.00381   0.00000   0.00000
  33        2PX         0.00446  -0.00016   0.00133   0.00000   0.00000
  34        2PY         0.00019  -0.00028   0.00493   0.00000   0.00000
  35        2PZ         0.00000   0.00000   0.00000   0.00092   0.00246
  36        3S          0.00410  -0.00083   0.00507   0.00000   0.00000
  37        3PX         0.00765  -0.00091   0.00011   0.00000   0.00000
  38        3PY         0.00108  -0.00140   0.00177   0.00000   0.00000
  39        3PZ         0.00000   0.00000   0.00000   0.00148   0.00441
  40        4XX         0.00041  -0.00003   0.00003   0.00000   0.00000
  41        4YY        -0.00006   0.00000  -0.00017   0.00000   0.00000
  42        4ZZ        -0.00003   0.00000  -0.00001   0.00000   0.00000
  43        4XY         0.00001  -0.00005   0.00023   0.00000   0.00000
  44        4XZ         0.00000   0.00000   0.00000   0.00005   0.00019
  45        4YZ         0.00000   0.00000   0.00000   0.00002  -0.00008
  46 4   N  1S         -0.00042   0.00000  -0.00012   0.00000   0.00000
  47        2S          0.00508  -0.00027   0.00120   0.00000   0.00000
  48        2PX         0.00294  -0.00002   0.00255   0.00000   0.00000
  49        2PY        -0.00421   0.00005   0.00252   0.00000   0.00000
  50        2PZ         0.00000   0.00000   0.00000   0.00014   0.00323
  51        3S          0.00914  -0.00135   0.00075   0.00000   0.00000
  52        3PX         0.00346  -0.00007   0.00480   0.00000   0.00000
  53        3PY        -0.00483   0.00050   0.00061   0.00000   0.00000
  54        3PZ         0.00000   0.00000   0.00000   0.00011   0.00352
  55        4XX        -0.00004   0.00001   0.00003   0.00000   0.00000
  56        4YY        -0.00040  -0.00001   0.00010   0.00000   0.00000
  57        4ZZ        -0.00002   0.00001  -0.00002   0.00000   0.00000
  58        4XY         0.00010   0.00000   0.00013   0.00000   0.00000
  59        4XZ         0.00000   0.00000   0.00000   0.00000   0.00006
  60        4YZ         0.00000   0.00000   0.00000   0.00003   0.00034
  61 5   H  1S          0.00000   0.00000   0.00003   0.00000   0.00000
  62        2S          0.00030  -0.00007   0.00026   0.00000   0.00000
  63        3PX         0.00000   0.00000   0.00000   0.00000   0.00000
  64        3PY         0.00000   0.00000   0.00000   0.00000   0.00000
  65        3PZ         0.00000   0.00000   0.00000   0.00000   0.00000
  66 6   H  1S          0.00001   0.00000   0.00002   0.00005   0.00002
  67        2S          0.00035   0.00001  -0.00012   0.00019   0.00015
  68        3PX         0.00000   0.00000   0.00000   0.00000   0.00000
  69        3PY         0.00000   0.00000   0.00000   0.00000   0.00000
  70        3PZ         0.00000   0.00000   0.00000   0.00000   0.00000
  71 7   H  1S          0.00001   0.00000   0.00002   0.00005   0.00002
  72        2S          0.00035   0.00001  -0.00012   0.00019   0.00015
  73        3PX         0.00000   0.00000   0.00000   0.00000   0.00000
  74        3PY         0.00000   0.00000   0.00000   0.00000   0.00000
  75        3PZ         0.00000   0.00000   0.00000   0.00000   0.00000
  76 8   H  1S          0.00035   0.00001  -0.00009   0.00000   0.00000
  77        2S         -0.00022   0.00017  -0.00026   0.00000   0.00000
  78        3PX         0.00000   0.00000   0.00000   0.00000   0.00000
  79        3PY         0.00006   0.00000   0.00001   0.00000   0.00000
  80        3PZ         0.00000   0.00000   0.00000   0.00000   0.00001
                          31        32        33        34        35
  31 3   O  1S          2.07931
  32        2S         -0.04288   0.52119
  33        2PX         0.00000   0.00000   0.66714
  34        2PY         0.00000   0.00000   0.00000   0.54071
  35        2PZ         0.00000   0.00000   0.00000   0.00000   0.77274
  36        3S         -0.04185   0.44438   0.00000   0.00000   0.00000
  37        3PX         0.00000   0.00000   0.24058   0.00000   0.00000
  38        3PY         0.00000   0.00000   0.00000   0.15014   0.00000
  39        3PZ         0.00000   0.00000   0.00000   0.00000   0.30175
  40        4XX        -0.00028  -0.00346   0.00000   0.00000   0.00000
  41        4YY        -0.00038   0.00048   0.00000   0.00000   0.00000
  42        4ZZ        -0.00032  -0.00200   0.00000   0.00000   0.00000
  43        4XY         0.00000   0.00000   0.00000   0.00000   0.00000
  44        4XZ         0.00000   0.00000   0.00000   0.00000   0.00000
  45        4YZ         0.00000   0.00000   0.00000   0.00000   0.00000
  46 4   N  1S          0.00000   0.00000   0.00000   0.00000   0.00000
  47        2S          0.00000   0.00000   0.00000  -0.00001   0.00000
  48        2PX         0.00000  -0.00001   0.00000  -0.00001   0.00000
  49        2PY         0.00000  -0.00003   0.00000  -0.00010   0.00000
  50        2PZ         0.00000   0.00000   0.00000   0.00000  -0.00001
  51        3S          0.00001  -0.00025   0.00022  -0.00056   0.00000
  52        3PX         0.00004  -0.00065   0.00042  -0.00097   0.00000
  53        3PY         0.00018  -0.00309   0.00004  -0.00497   0.00000
  54        3PZ         0.00000   0.00000   0.00000   0.00000  -0.00165
  55        4XX         0.00000   0.00000   0.00000   0.00000   0.00000
  56        4YY         0.00000   0.00000   0.00000   0.00000   0.00000
  57        4ZZ         0.00000   0.00000   0.00000   0.00000   0.00000
  58        4XY         0.00000   0.00000   0.00000   0.00000   0.00000
  59        4XZ         0.00000   0.00000   0.00000   0.00000   0.00000
  60        4YZ         0.00000   0.00000   0.00000   0.00000   0.00000
  61 5   H  1S          0.00000   0.00000   0.00000   0.00000   0.00000
  62        2S          0.00000   0.00003   0.00021   0.00003   0.00000
  63        3PX         0.00000   0.00000   0.00000   0.00000   0.00000
  64        3PY         0.00000   0.00000   0.00000   0.00000   0.00000
  65        3PZ         0.00000   0.00000   0.00000   0.00000   0.00000
  66 6   H  1S          0.00000   0.00000   0.00000   0.00000   0.00000
  67        2S         -0.00001   0.00015   0.00003   0.00001   0.00019
  68        3PX         0.00000   0.00000   0.00000   0.00000   0.00000
  69        3PY         0.00000   0.00000   0.00000   0.00000   0.00000
  70        3PZ         0.00000   0.00000   0.00000   0.00000   0.00000
  71 7   H  1S          0.00000   0.00000   0.00000   0.00000   0.00000
  72        2S         -0.00001   0.00014   0.00003   0.00001   0.00019
  73        3PX         0.00000   0.00000   0.00000   0.00000   0.00000
  74        3PY         0.00000   0.00000   0.00000   0.00000   0.00000
  75        3PZ         0.00000   0.00000   0.00000   0.00000   0.00000
  76 8   H  1S         -0.00145   0.02250   0.02788   0.06750   0.00000
  77        2S          0.00095  -0.01278   0.00511   0.01727   0.00000
  78        3PX        -0.00022   0.00251  -0.00003   0.00393   0.00000
  79        3PY        -0.00047   0.00545   0.00389   0.00227   0.00000
  80        3PZ         0.00000   0.00000   0.00000   0.00000   0.00374
                          36        37        38        39        40
  36        3S          0.76570
  37        3PX         0.00000   0.35358
  38        3PY         0.00000   0.00000   0.17198
  39        3PZ         0.00000   0.00000   0.00000   0.47235
  40        4XX        -0.01104   0.00000   0.00000   0.00000   0.00255
  41        4YY        -0.00338   0.00000   0.00000   0.00000   0.00001
  42        4ZZ        -0.00235   0.00000   0.00000   0.00000  -0.00004
  43        4XY         0.00000   0.00000   0.00000   0.00000   0.00000
  44        4XZ         0.00000   0.00000   0.00000   0.00000   0.00000
  45        4YZ         0.00000   0.00000   0.00000   0.00000   0.00000
  46 4   N  1S          0.00000  -0.00001   0.00003   0.00000   0.00000
  47        2S          0.00007   0.00016  -0.00068   0.00000   0.00000
  48        2PX        -0.00107   0.00058  -0.00115   0.00000   0.00000
  49        2PY        -0.00363  -0.00051  -0.00397   0.00000   0.00000
  50        2PZ         0.00000   0.00000   0.00000  -0.00142   0.00000
  51        3S          0.00077   0.00168  -0.00225   0.00000   0.00011
  52        3PX        -0.00874   0.00630  -0.00620   0.00000   0.00002
  53        3PY        -0.02849  -0.00132  -0.01706   0.00000  -0.00015
  54        3PZ         0.00000   0.00000   0.00000  -0.01260   0.00000
  55        4XX         0.00008  -0.00001   0.00003   0.00000   0.00000
  56        4YY        -0.00040  -0.00001  -0.00004   0.00000   0.00000
  57        4ZZ         0.00001   0.00000   0.00002   0.00000   0.00000
  58        4XY        -0.00006   0.00001  -0.00002   0.00000   0.00000
  59        4XZ         0.00000   0.00000   0.00000   0.00002   0.00000
  60        4YZ         0.00000   0.00000   0.00000  -0.00012   0.00000
  61 5   H  1S          0.00000   0.00003   0.00000   0.00000   0.00000
  62        2S          0.00027   0.00246   0.00042   0.00000   0.00003
  63        3PX         0.00000   0.00000   0.00000   0.00000   0.00000
  64        3PY         0.00000   0.00000   0.00000   0.00000   0.00000
  65        3PZ         0.00000   0.00000   0.00000   0.00000   0.00000
  66 6   H  1S          0.00007  -0.00011   0.00001  -0.00004   0.00000
  67        2S          0.00296   0.00156   0.00011   0.00158  -0.00007
  68        3PX        -0.00001  -0.00004   0.00000   0.00001   0.00000
  69        3PY         0.00000   0.00000   0.00000   0.00000   0.00000
  70        3PZ         0.00000   0.00000   0.00000   0.00000   0.00000
  71 7   H  1S          0.00007  -0.00011   0.00001  -0.00004   0.00000
  72        2S          0.00296   0.00156   0.00011   0.00158  -0.00007
  73        3PX        -0.00001  -0.00004   0.00000   0.00001   0.00000
  74        3PY         0.00000   0.00000   0.00000   0.00000   0.00000
  75        3PZ         0.00000   0.00000   0.00000   0.00000   0.00000
  76 8   H  1S          0.00813   0.03624   0.06886   0.00000   0.00259
  77        2S         -0.06680   0.00931   0.03259   0.00000   0.00155
  78        3PX         0.00202   0.00115   0.00155   0.00000   0.00003
  79        3PY         0.00365   0.00189  -0.00001   0.00000   0.00027
  80        3PZ         0.00000   0.00000   0.00000   0.00550   0.00000
                          41        42        43        44        45
  41        4YY         0.00075
  42        4ZZ         0.00003   0.00014
  43        4XY         0.00000   0.00000   0.00129
  44        4XZ         0.00000   0.00000   0.00000   0.00132
  45        4YZ         0.00000   0.00000   0.00000   0.00000   0.00025
  46 4   N  1S          0.00000   0.00000   0.00000   0.00000   0.00000
  47        2S          0.00000   0.00000   0.00000   0.00000   0.00000
  48        2PX         0.00001   0.00000   0.00000   0.00000   0.00000
  49        2PY         0.00013   0.00000  -0.00001   0.00000   0.00000
  50        2PZ         0.00000   0.00000   0.00000   0.00000   0.00001
  51        3S         -0.00023  -0.00002  -0.00004   0.00000   0.00000
  52        3PX         0.00030   0.00002   0.00008   0.00000   0.00000
  53        3PY         0.00186   0.00005  -0.00009   0.00000   0.00000
  54        3PZ         0.00000   0.00000   0.00000  -0.00001   0.00025
  55        4XX         0.00000   0.00000   0.00000   0.00000   0.00000
  56        4YY         0.00003   0.00000   0.00000   0.00000   0.00000
  57        4ZZ         0.00000   0.00000   0.00000   0.00000   0.00000
  58        4XY         0.00000   0.00000   0.00000   0.00000   0.00000
  59        4XZ         0.00000   0.00000   0.00000   0.00000   0.00000
  60        4YZ         0.00000   0.00000   0.00000   0.00000   0.00000
  61 5   H  1S          0.00000   0.00000   0.00000   0.00000   0.00000
  62        2S          0.00000   0.00000   0.00000   0.00000   0.00000
  63        3PX         0.00000   0.00000   0.00000   0.00000   0.00000
  64        3PY         0.00000   0.00000   0.00000   0.00000   0.00000
  65        3PZ         0.00000   0.00000   0.00000   0.00000   0.00000
  66 6   H  1S          0.00000   0.00000   0.00000   0.00000   0.00000
  67        2S         -0.00001  -0.00001   0.00000   0.00002   0.00000
  68        3PX         0.00000   0.00000   0.00000   0.00000   0.00000
  69        3PY         0.00000   0.00000   0.00000   0.00000   0.00000
  70        3PZ         0.00000   0.00000   0.00000   0.00000   0.00000
  71 7   H  1S          0.00000   0.00000   0.00000   0.00000   0.00000
  72        2S         -0.00001  -0.00001   0.00000   0.00002   0.00000
  73        3PX         0.00000   0.00000   0.00000   0.00000   0.00000
  74        3PY         0.00000   0.00000   0.00000   0.00000   0.00000
  75        3PZ         0.00000   0.00000   0.00000   0.00000   0.00000
  76 8   H  1S          0.00176  -0.00053   0.00361   0.00000   0.00000
  77        2S          0.00177  -0.00025   0.00037   0.00000   0.00000
  78        3PX         0.00007  -0.00001  -0.00003   0.00000   0.00000
  79        3PY         0.00001  -0.00004   0.00007   0.00000   0.00000
  80        3PZ         0.00000   0.00000   0.00000   0.00022   0.00003
                          46        47        48        49        50
  46 4   N  1S          2.07464
  47        2S         -0.03070   0.40421
  48        2PX         0.00000   0.00000   0.59638
  49        2PY         0.00000   0.00000   0.00000   0.44749
  50        2PZ         0.00000   0.00000   0.00000   0.00000   0.34890
  51        3S         -0.04630   0.40779   0.00000   0.00000   0.00000
  52        3PX         0.00000   0.00000   0.27554   0.00000   0.00000
  53        3PY         0.00000   0.00000   0.00000   0.17357   0.00000
  54        3PZ         0.00000   0.00000   0.00000   0.00000   0.14740
  55        4XX        -0.00025  -0.00637   0.00000   0.00000   0.00000
  56        4YY        -0.00019  -0.00682   0.00000   0.00000   0.00000
  57        4ZZ        -0.00036  -0.00390   0.00000   0.00000   0.00000
  58        4XY         0.00000   0.00000   0.00000   0.00000   0.00000
  59        4XZ         0.00000   0.00000   0.00000   0.00000   0.00000
  60        4YZ         0.00000   0.00000   0.00000   0.00000   0.00000
  61 5   H  1S          0.00000   0.00000  -0.00001   0.00000   0.00000
  62        2S         -0.00002   0.00038   0.00059  -0.00045   0.00000
  63        3PX         0.00000   0.00000   0.00000   0.00000   0.00000
  64        3PY         0.00000   0.00000   0.00000   0.00000   0.00000
  65        3PZ         0.00000   0.00000   0.00000   0.00000   0.00000
  66 6   H  1S          0.00000   0.00000   0.00000   0.00000   0.00000
  67        2S          0.00000   0.00004   0.00045   0.00006  -0.00020
  68        3PX         0.00000   0.00000   0.00000   0.00000   0.00000
  69        3PY         0.00000   0.00000   0.00000   0.00000   0.00000
  70        3PZ         0.00000   0.00000   0.00000   0.00000   0.00000
  71 7   H  1S          0.00000   0.00000   0.00000   0.00000   0.00000
  72        2S          0.00000   0.00004   0.00045   0.00006  -0.00020
  73        3PX         0.00000   0.00000   0.00000   0.00000   0.00000
  74        3PY         0.00000   0.00000   0.00000   0.00000   0.00000
  75        3PZ         0.00000   0.00000   0.00000   0.00000   0.00000
  76 8   H  1S          0.00000   0.00000   0.00000   0.00000   0.00000
  77        2S          0.00000   0.00001  -0.00001   0.00064   0.00000
  78        3PX         0.00000   0.00000   0.00000   0.00000   0.00000
  79        3PY         0.00000   0.00000   0.00000   0.00000   0.00000
  80        3PZ         0.00000   0.00000   0.00000   0.00000   0.00000
                          51        52        53        54        55
  51        3S          0.76657
  52        3PX         0.00000   0.47595
  53        3PY         0.00000   0.00000   0.25889
  54        3PZ         0.00000   0.00000   0.00000   0.23256
  55        4XX        -0.00951   0.00000   0.00000   0.00000   0.00067
  56        4YY        -0.01791   0.00000   0.00000   0.00000   0.00004
  57        4ZZ        -0.00484   0.00000   0.00000   0.00000   0.00007
  58        4XY         0.00000   0.00000   0.00000   0.00000   0.00000
  59        4XZ         0.00000   0.00000   0.00000   0.00000   0.00000
  60        4YZ         0.00000   0.00000   0.00000   0.00000   0.00000
  61 5   H  1S          0.00007  -0.00139   0.00004   0.00000   0.00000
  62        2S          0.00481   0.00487  -0.00230   0.00000  -0.00001
  63        3PX         0.00000   0.00005  -0.00002   0.00000   0.00000
  64        3PY         0.00000   0.00001   0.00000   0.00000   0.00000
  65        3PZ         0.00000   0.00000   0.00000   0.00000   0.00000
  66 6   H  1S          0.00000   0.00014   0.00003  -0.00009   0.00000
  67        2S         -0.00033   0.00488   0.00024  -0.00196   0.00001
  68        3PX         0.00000  -0.00001   0.00000   0.00000   0.00000
  69        3PY         0.00000  -0.00001   0.00000   0.00000   0.00000
  70        3PZ         0.00000   0.00000   0.00000   0.00000   0.00000
  71 7   H  1S          0.00000   0.00014   0.00003  -0.00009   0.00000
  72        2S         -0.00033   0.00487   0.00024  -0.00196   0.00001
  73        3PX         0.00000  -0.00001   0.00000   0.00000   0.00000
  74        3PY         0.00000  -0.00001   0.00000   0.00000   0.00000
  75        3PZ         0.00000   0.00000   0.00000   0.00000   0.00000
  76 8   H  1S          0.00004  -0.00001   0.00050   0.00000   0.00000
  77        2S         -0.00024  -0.00014   0.00599   0.00000  -0.00001
  78        3PX         0.00000   0.00000   0.00000   0.00000   0.00000
  79        3PY         0.00001   0.00000  -0.00002   0.00000   0.00000
  80        3PZ         0.00000   0.00000   0.00000   0.00000   0.00000
                          56        57        58        59        60
  56        4YY         0.00304
  57        4ZZ         0.00004   0.00015
  58        4XY         0.00000   0.00000   0.00126
  59        4XZ         0.00000   0.00000   0.00000   0.00016
  60        4YZ         0.00000   0.00000   0.00000   0.00000   0.00141
  61 5   H  1S          0.00000   0.00000   0.00000   0.00000   0.00000
  62        2S         -0.00010  -0.00001  -0.00001   0.00000   0.00000
  63        3PX         0.00000   0.00000   0.00000   0.00000   0.00000
  64        3PY         0.00000   0.00000   0.00000   0.00000   0.00000
  65        3PZ         0.00000   0.00000   0.00000   0.00000   0.00000
  66 6   H  1S          0.00000   0.00000   0.00000   0.00000   0.00000
  67        2S          0.00001   0.00000   0.00002   0.00000  -0.00002
  68        3PX         0.00000   0.00000   0.00000   0.00000   0.00000
  69        3PY         0.00000   0.00000   0.00000   0.00000   0.00000
  70        3PZ         0.00000   0.00000   0.00000   0.00000   0.00000
  71 7   H  1S          0.00000   0.00000   0.00000   0.00000   0.00000
  72        2S          0.00001   0.00000   0.00002   0.00000  -0.00002
  73        3PX         0.00000   0.00000   0.00000   0.00000   0.00000
  74        3PY         0.00000   0.00000   0.00000   0.00000   0.00000
  75        3PZ         0.00000   0.00000   0.00000   0.00000   0.00000
  76 8   H  1S          0.00000   0.00000   0.00000   0.00000   0.00000
  77        2S          0.00007   0.00000   0.00000   0.00000   0.00000
  78        3PX         0.00000   0.00000   0.00000   0.00000   0.00000
  79        3PY         0.00000   0.00000   0.00000   0.00000   0.00000
  80        3PZ         0.00000   0.00000   0.00000   0.00000   0.00000
                          61        62        63        64        65
  61 5   H  1S          0.21910
  62        2S          0.10663   0.14461
  63        3PX         0.00000   0.00000   0.00025
  64        3PY         0.00000   0.00000   0.00000   0.00033
  65        3PZ         0.00000   0.00000   0.00000   0.00000   0.00026
  66 6   H  1S         -0.00049  -0.00584  -0.00001   0.00005   0.00006
  67        2S         -0.00721  -0.01499  -0.00005   0.00010   0.00025
  68        3PX         0.00002   0.00008   0.00000   0.00000   0.00000
  69        3PY         0.00009   0.00028   0.00000   0.00000   0.00000
  70        3PZ        -0.00001  -0.00008   0.00000   0.00000   0.00000
  71 7   H  1S         -0.00049  -0.00584  -0.00001   0.00005   0.00006
  72        2S         -0.00721  -0.01500  -0.00005   0.00009   0.00025
  73        3PX         0.00002   0.00008   0.00000   0.00000   0.00000
  74        3PY         0.00009   0.00028   0.00000   0.00000   0.00000
  75        3PZ        -0.00001  -0.00008   0.00000   0.00000   0.00000
  76 8   H  1S          0.00000   0.00002   0.00000   0.00000   0.00000
  77        2S          0.00001  -0.00027   0.00000   0.00000   0.00000
  78        3PX         0.00000   0.00000   0.00000   0.00000   0.00000
  79        3PY         0.00000   0.00000   0.00000   0.00000   0.00000
  80        3PZ         0.00000   0.00000   0.00000   0.00000   0.00000
                          66        67        68        69        70
  66 6   H  1S          0.21782
  67        2S          0.11908   0.18344
  68        3PX         0.00000   0.00000   0.00026
  69        3PY         0.00000   0.00000   0.00000   0.00029
  70        3PZ         0.00000   0.00000   0.00000   0.00000   0.00034
  71 7   H  1S         -0.00046  -0.00710   0.00000   0.00000   0.00012
  72        2S         -0.00710  -0.02134   0.00000   0.00000   0.00034
  73        3PX         0.00000   0.00000   0.00000   0.00000   0.00000
  74        3PY         0.00000   0.00000   0.00000   0.00000   0.00000
  75        3PZ         0.00012   0.00034   0.00000   0.00000   0.00001
  76 8   H  1S          0.00000  -0.00017   0.00000   0.00000   0.00000
  77        2S         -0.00007  -0.00175   0.00001   0.00000   0.00000
  78        3PX         0.00000   0.00002   0.00000   0.00000   0.00000
  79        3PY         0.00000   0.00000   0.00000   0.00000   0.00000
  80        3PZ         0.00000   0.00002   0.00000   0.00000   0.00000
                          71        72        73        74        75
  71 7   H  1S          0.21782
  72        2S          0.11907   0.18338
  73        3PX         0.00000   0.00000   0.00026
  74        3PY         0.00000   0.00000   0.00000   0.00029
  75        3PZ         0.00000   0.00000   0.00000   0.00000   0.00034
  76 8   H  1S          0.00000  -0.00017   0.00000   0.00000   0.00000
  77        2S         -0.00007  -0.00175   0.00001   0.00000   0.00000
  78        3PX         0.00000   0.00002   0.00000   0.00000   0.00000
  79        3PY         0.00000   0.00000   0.00000   0.00000   0.00000
  80        3PZ         0.00000   0.00002   0.00000   0.00000   0.00000
                          76        77        78        79        80
  76 8   H  1S          0.21361
  77        2S          0.05834   0.05825
  78        3PX         0.00000   0.00000   0.00095
  79        3PY         0.00000   0.00000   0.00000   0.00141
  80        3PZ         0.00000   0.00000   0.00000   0.00000   0.00081
     Gross orbital populations:
                         Total     Alpha     Beta      Spin
   1 1   C  1S          1.99462   0.99731   0.99731   0.00000
   2        2S          0.66891   0.33445   0.33445   0.00000
   3        2PX         0.69775   0.34888   0.34888   0.00000
   4        2PY         0.69280   0.34640   0.34640   0.00000
   5        2PZ         0.68411   0.34205   0.34205   0.00000
   6        3S          0.63737   0.31868   0.31868   0.00000
   7        3PX         0.31553   0.15776   0.15776   0.00000
   8        3PY         0.37287   0.18644   0.18644   0.00000
   9        3PZ         0.36173   0.18086   0.18086   0.00000
  10        4XX         0.00927   0.00463   0.00463   0.00000
  11        4YY         0.00039   0.00020   0.00020   0.00000
  12        4ZZ         0.00269   0.00135   0.00135   0.00000
  13        4XY         0.00733   0.00366   0.00366   0.00000
  14        4XZ         0.00421   0.00211   0.00211   0.00000
  15        4YZ         0.00709   0.00354   0.00354   0.00000
  16 2   C  1S          1.99404   0.99702   0.99702   0.00000
  17        2S          0.68894   0.34447   0.34447   0.00000
  18        2PX         0.64513   0.32257   0.32257   0.00000
  19        2PY         0.67592   0.33796   0.33796   0.00000
  20        2PZ         0.58817   0.29408   0.29408   0.00000
  21        3S          0.37157   0.18578   0.18578   0.00000
  22        3PX         0.13854   0.06927   0.06927   0.00000
  23        3PY         0.05567   0.02783   0.02783   0.00000
  24        3PZ         0.41314   0.20657   0.20657   0.00000
  25        4XX         0.01698   0.00849   0.00849   0.00000
  26        4YY         0.02115   0.01057   0.01057   0.00000
  27        4ZZ        -0.01234  -0.00617  -0.00617   0.00000
  28        4XY         0.03826   0.01913   0.01913   0.00000
  29        4XZ         0.00583   0.00292   0.00292   0.00000
  30        4YZ         0.01671   0.00836   0.00836   0.00000
  31 3   O  1S          1.99412   0.99706   0.99706   0.00000
  32        2S          0.92027   0.46013   0.46013   0.00000
  33        2PX         0.98077   0.49039   0.49039   0.00000
  34        2PY         0.83537   0.41768   0.41768   0.00000
  35        2PZ         1.08707   0.54353   0.54353   0.00000
  36        3S          0.92368   0.46184   0.46184   0.00000
  37        3PX         0.65075   0.32537   0.32537   0.00000
  38        3PY         0.44142   0.22071   0.22071   0.00000
  39        3PZ         0.77371   0.38685   0.38685   0.00000
  40        4XX        -0.00077  -0.00039  -0.00039   0.00000
  41        4YY         0.00753   0.00376   0.00376   0.00000
  42        4ZZ        -0.00484  -0.00242  -0.00242   0.00000
  43        4XY         0.00999   0.00499   0.00499   0.00000
  44        4XZ         0.00306   0.00153   0.00153   0.00000
  45        4YZ         0.00240   0.00120   0.00120   0.00000
  46 4   N  1S          1.99460   0.99730   0.99730   0.00000
  47        2S          0.80393   0.40196   0.40196   0.00000
  48        2PX         0.91962   0.45981   0.45981   0.00000
  49        2PY         0.76083   0.38041   0.38041   0.00000
  50        2PZ         0.56439   0.28219   0.28219   0.00000
  51        3S          1.05094   0.52547   0.52547   0.00000
  52        3PX         0.78878   0.39439   0.39439   0.00000
  53        3PY         0.54652   0.27326   0.27326   0.00000
  54        3PZ         0.52132   0.26066   0.26066   0.00000
  55        4XX        -0.01439  -0.00720  -0.00720   0.00000
  56        4YY        -0.00461  -0.00230  -0.00230   0.00000
  57        4ZZ        -0.00958  -0.00479  -0.00479   0.00000
  58        4XY         0.00584   0.00292   0.00292   0.00000
  59        4XZ         0.00090   0.00045   0.00045   0.00000
  60        4YZ         0.00789   0.00395   0.00395   0.00000
  61 5   H  1S          0.53399   0.26700   0.26700   0.00000
  62        2S          0.33417   0.16709   0.16709   0.00000
  63        3PX         0.00385   0.00193   0.00193   0.00000
  64        3PY         0.00535   0.00268   0.00268   0.00000
  65        3PZ         0.00326   0.00163   0.00163   0.00000
  66 6   H  1S          0.53252   0.26626   0.26626   0.00000
  67        2S          0.34686   0.17343   0.17343   0.00000
  68        3PX         0.00345   0.00173   0.00173   0.00000
  69        3PY         0.00433   0.00216   0.00216   0.00000
  70        3PZ         0.00541   0.00270   0.00270   0.00000
  71 7   H  1S          0.53251   0.26626   0.26626   0.00000
  72        2S          0.34683   0.17342   0.17342   0.00000
  73        3PX         0.00345   0.00173   0.00173   0.00000
  74        3PY         0.00433   0.00216   0.00216   0.00000
  75        3PZ         0.00541   0.00271   0.00271   0.00000
  76 8   H  1S          0.50147   0.25074   0.25074   0.00000
  77        2S          0.11640   0.05820   0.05820   0.00000
  78        3PX         0.01215   0.00607   0.00607   0.00000
  79        3PY         0.01803   0.00901   0.00901   0.00000
  80        3PZ         0.01036   0.00518   0.00518   0.00000
          Condensed to atoms (all electrons):
              1          2          3          4          5          6
     1  C    5.329908   0.302350  -0.106047  -0.124796   0.372324   0.339481
     2  C    0.302350   4.552675   0.130066   0.764107  -0.023772  -0.032126
     3  O   -0.106047   0.130066   8.409773  -0.089073   0.003476   0.006388
     4  N   -0.124796   0.764107  -0.089073   7.366881   0.006491   0.003279
     5  H    0.372324  -0.023772   0.003476   0.006491   0.577816  -0.027738
     6  H    0.339481  -0.032126   0.006388   0.003279  -0.027738   0.640304
     7  H    0.339541  -0.032132   0.006380   0.003274  -0.027739  -0.035081
     8  H    0.003897  -0.003453   0.263557   0.006805  -0.000231  -0.001938
              7          8
     1  C    0.339541   0.003897
     2  C   -0.032132  -0.003453
     3  O    0.006380   0.263557
     4  N    0.003274   0.006805
     5  H   -0.027739  -0.000231
     6  H   -0.035081  -0.001938
     7  H    0.640223  -0.001932
     8  H   -0.001932   0.391703
 Mulliken atomic charges:
              1
     1  C   -0.456660
     2  C    0.342286
     3  O   -0.624520
     4  N   -0.936969
     5  H    0.119372
     6  H    0.107431
     7  H    0.107467
     8  H    0.341593
 Sum of Mulliken atomic charges =  -1.00000
 Mulliken charges with hydrogens summed into heavy atoms:
              1
     1  C   -0.122390
     2  C    0.342286
     3  O   -0.282927
     4  N   -0.936969
 Sum of Mulliken charges with hydrogens summed into heavy atoms =  -1.00000
          Atomic-Atomic Spin Densities.
              1          2          3          4          5          6
     1  C    0.000000   0.000000   0.000000   0.000000   0.000000   0.000000
     2  C    0.000000   0.000000   0.000000   0.000000   0.000000   0.000000
     3  O    0.000000   0.000000   0.000000   0.000000   0.000000   0.000000
     4  N    0.000000   0.000000   0.000000   0.000000   0.000000   0.000000
     5  H    0.000000   0.000000   0.000000   0.000000   0.000000   0.000000
     6  H    0.000000   0.000000   0.000000   0.000000   0.000000   0.000000
     7  H    0.000000   0.000000   0.000000   0.000000   0.000000   0.000000
     8  H    0.000000   0.000000   0.000000   0.000000   0.000000   0.000000
              7          8
     1  C    0.000000   0.000000
     2  C    0.000000   0.000000
     3  O    0.000000   0.000000
     4  N    0.000000   0.000000
     5  H    0.000000   0.000000
     6  H    0.000000   0.000000
     7  H    0.000000   0.000000
     8  H    0.000000   0.000000
 Mulliken atomic spin densities:
              1
     1  C    0.000000
     2  C    0.000000
     3  O    0.000000
     4  N    0.000000
     5  H    0.000000
     6  H    0.000000
     7  H    0.000000
     8  H    0.000000
 Sum of Mulliken atomic spin densities =   0.00000
 Electronic spatial extent (au):  <R**2>=            274.8817
 Charge=             -1.0000 electrons
 Dipole moment (field-independent basis, Debye):
    X=             -4.4182    Y=             -7.5188    Z=              0.0002  Tot=              8.7209
 Quadrupole moment (field-independent basis, Debye-Ang):
   XX=            -31.8742   YY=            -34.0120   ZZ=            -26.1965
   XY=             -3.0032   XZ=             -0.0001   YZ=             -0.0002
 Traceless Quadrupole moment (field-independent basis, Debye-Ang):
   XX=             -1.1800   YY=             -3.3177   ZZ=              4.4977
   XY=             -3.0032   XZ=             -0.0001   YZ=             -0.0002
 Octapole moment (field-independent basis, Debye-Ang**2):
  XXX=             -2.6722  YYY=            -35.6129  ZZZ=              0.0008  XYY=             -5.7594
  XXY=             -3.0550  XXZ=              0.0000  XZZ=              0.3638  YZZ=             -3.6877
  YYZ=             -0.0002  XYZ=              0.0003
 Hexadecapole moment (field-independent basis, Debye-Ang**3):
 XXXX=           -185.8960 YYYY=           -170.8052 ZZZZ=            -31.2981 XXXY=            -10.3777
 XXXZ=              0.0002 YYYX=            -19.3992 YYYZ=              0.0000 ZZZX=             -0.0014
 ZZZY=             -0.0005 XXYY=            -61.9119 XXZZ=            -34.9937 YYZZ=            -31.3998
 XXYZ=             -0.0011 YYXZ=              0.0008 ZZXY=             -1.4383
 N-N= 1.107129590352D+02 E-N=-1.076165068033D+03  KE= 3.104437578078D+02
 Orbital energies and kinetic energies (alpha):
                                 1                 2
   1         O               -18.965782         29.077441
   2         O               -14.035941         22.020788
   3         O               -10.069804         15.938087
   4         O               -10.029135         15.938743
   5         O                -0.985948          2.589376
   6         O                -0.708970          1.809290
   7         O                -0.629721          1.537836
   8         O                -0.489554          2.012417
   9         O                -0.409017          1.603973
  10         O                -0.360550          1.031400
  11         O                -0.345020          1.103078
  12         O                -0.291623          1.964206
  13         O                -0.289382          1.794478
  14         O                -0.207253          1.804365
  15         O                -0.149587          1.619412
  16         O                -0.073506          1.636363
  17         V                 0.075144          1.707254
  18         V                 0.115864          1.141817
  19         V                 0.164866          1.090348
  20         V                 0.182507          1.245859
  21         V                 0.191361          1.105349
  22         V                 0.233719          2.160517
  23         V                 0.343694          2.045815
  24         V                 0.414871          1.798081
  25         V                 0.581289          1.799335
  26         V                 0.589308          2.364012
  27         V                 0.633771          2.178586
  28         V                 0.650369          2.017460
  29         V                 0.671833          2.058734
  30         V                 0.698266          2.370536
  31         V                 0.763657          2.624335
  32         V                 0.815706          2.337568
  33         V                 0.830922          2.888585
  34         V                 0.833194          2.656532
  35         V                 0.863627          2.469605
  36         V                 0.895066          2.593354
  37         V                 0.909816          2.595862
  38         V                 0.936368          2.327324
  39         V                 0.989053          3.460622
  40         V                 1.036454          2.772124
  41         V                 1.134024          2.394713
  42         V                 1.318074          2.379945
  43         V                 1.342846          2.592200
  44         V                 1.399240          2.556455
  45         V                 1.438229          2.557942
  46         V                 1.449550          2.598082
  47         V                 1.610277          2.589216
  48         V                 1.730890          2.946805
  49         V                 1.785876          2.786206
  50         V                 1.792658          3.081989
  51         V                 1.844873          2.987907
  52         V                 1.917813          3.017899
  53         V                 1.918096          2.913607
  54         V                 2.036401          3.312013
  55         V                 2.039596          3.220478
  56         V                 2.060184          2.917229
  57         V                 2.099235          3.143621
  58         V                 2.246222          3.247392
  59         V                 2.252492          3.267133
  60         V                 2.361780          3.686999
  61         V                 2.459634          3.752517
  62         V                 2.518580          3.469079
  63         V                 2.548427          3.668002
  64         V                 2.600681          3.728613
  65         V                 2.641295          4.152300
  66         V                 2.767638          3.629366
  67         V                 2.781970          4.026937
  68         V                 2.854633          4.187036
  69         V                 2.887125          4.101944
  70         V                 2.946530          3.892391
  71         V                 3.076486          4.435504
  72         V                 3.206798          4.645640
  73         V                 3.315408          4.877767
  74         V                 3.526890          5.028927
  75         V                 3.539458          5.098215
  76         V                 3.615236          6.334344
  77         V                 3.933938          9.554243
  78         V                 4.145787         10.223049
  79         V                 4.348230          9.927536
  80         V                 4.694927         10.102099
 Orbital energies and kinetic energies (beta):
                                 1                 2
   1         O               -18.965782         29.077441
   2         O               -14.035941         22.020788
   3         O               -10.069804         15.938087
   4         O               -10.029135         15.938743
   5         O                -0.985948          2.589376
   6         O                -0.708970          1.809290
   7         O                -0.629721          1.537836
   8         O                -0.489554          2.012417
   9         O                -0.409017          1.603973
  10         O                -0.360550          1.031400
  11         O                -0.345020          1.103078
  12         O                -0.291623          1.964206
  13         O                -0.289382          1.794478
  14         O                -0.207253          1.804365
  15         O                -0.149587          1.619412
  16         O                -0.073506          1.636363
  17         V                 0.075144          1.707254
  18         V                 0.115864          1.141817
  19         V                 0.164866          1.090348
  20         V                 0.182507          1.245859
  21         V                 0.191361          1.105349
  22         V                 0.233719          2.160517
  23         V                 0.343694          2.045815
  24         V                 0.414871          1.798081
  25         V                 0.581289          1.799335
  26         V                 0.589308          2.364012
  27         V                 0.633771          2.178586
  28         V                 0.650369          2.017460
  29         V                 0.671833          2.058734
  30         V                 0.698266          2.370536
  31         V                 0.763657          2.624335
  32         V                 0.815706          2.337568
  33         V                 0.830922          2.888585
  34         V                 0.833194          2.656532
  35         V                 0.863627          2.469605
  36         V                 0.895066          2.593354
  37         V                 0.909816          2.595862
  38         V                 0.936368          2.327324
  39         V                 0.989053          3.460622
  40         V                 1.036454          2.772124
  41         V                 1.134024          2.394713
  42         V                 1.318074          2.379945
  43         V                 1.342846          2.592200
  44         V                 1.399240          2.556455
  45         V                 1.438229          2.557942
  46         V                 1.449550          2.598082
  47         V                 1.610277          2.589216
  48         V                 1.730890          2.946805
  49         V                 1.785876          2.786206
  50         V                 1.792658          3.081989
  51         V                 1.844873          2.987907
  52         V                 1.917813          3.017899
  53         V                 1.918096          2.913607
  54         V                 2.036401          3.312013
  55         V                 2.039596          3.220478
  56         V                 2.060184          2.917229
  57         V                 2.099235          3.143621
  58         V                 2.246222          3.247392
  59         V                 2.252492          3.267133
  60         V                 2.361780          3.686999
  61         V                 2.459634          3.752517
  62         V                 2.518580          3.469079
  63         V                 2.548427          3.668002
  64         V                 2.600681          3.728613
  65         V                 2.641295          4.152300
  66         V                 2.767638          3.629366
  67         V                 2.781970          4.026937
  68         V                 2.854633          4.187036
  69         V                 2.887125          4.101944
  70         V                 2.946530          3.892391
  71         V                 3.076486          4.435504
  72         V                 3.206798          4.645640
  73         V                 3.315408          4.877767
  74         V                 3.526890          5.028927
  75         V                 3.539458          5.098215
  76         V                 3.615236          6.334344
  77         V                 3.933938          9.554243
  78         V                 4.145787         10.223049
  79         V                 4.348230          9.927536
  80         V                 4.694927         10.102099
 Total kinetic energy from orbitals= 2.069625052052D+02
                          Isotropic Fermi Contact Couplings
        Atom                 a.u.       MegaHertz       Gauss      10(-4) cm-1
     1  C(13)              0.00000       0.00000       0.00000       0.00000
     2  C(13)              0.00000       0.00000       0.00000       0.00000
     3  O(17)              0.00000       0.00000       0.00000       0.00000
     4  N(14)              0.00000       0.00000       0.00000       0.00000
     5  H(1)               0.00000       0.00000       0.00000       0.00000
     6  H(1)               0.00000       0.00000       0.00000       0.00000
     7  H(1)               0.00000       0.00000       0.00000       0.00000
     8  H(1)               0.00000       0.00000       0.00000       0.00000
 --------------------------------------------------------
       Center         ----  Spin Dipole Couplings  ----
                      3XX-RR        3YY-RR        3ZZ-RR
 --------------------------------------------------------
     1   Atom        0.000000      0.000000      0.000000
     2   Atom        0.000000      0.000000      0.000000
     3   Atom        0.000000      0.000000      0.000000
     4   Atom        0.000000      0.000000      0.000000
     5   Atom        0.000000      0.000000      0.000000
     6   Atom        0.000000      0.000000      0.000000
     7   Atom        0.000000      0.000000      0.000000
     8   Atom        0.000000      0.000000      0.000000
 --------------------------------------------------------
                        XY            XZ            YZ
 --------------------------------------------------------
     1   Atom        0.000000      0.000000      0.000000
     2   Atom        0.000000      0.000000      0.000000
     3   Atom        0.000000      0.000000      0.000000
     4   Atom        0.000000      0.000000      0.000000
     5   Atom        0.000000      0.000000      0.000000
     6   Atom        0.000000      0.000000      0.000000
     7   Atom        0.000000      0.000000      0.000000
     8   Atom        0.000000      0.000000      0.000000
 --------------------------------------------------------


 ---------------------------------------------------------------------------------
              Anisotropic Spin Dipole Couplings in Principal Axis System
 ---------------------------------------------------------------------------------

       Atom             a.u.   MegaHertz   Gauss  10(-4) cm-1        Axes

              Baa     0.0000     0.000     0.000     0.000  1.0000  0.0000  0.0000
     1 C(13)  Bbb     0.0000     0.000     0.000     0.000  0.0000  1.0000  0.0000
              Bcc     0.0000     0.000     0.000     0.000  0.0000  0.0000  1.0000
 
              Baa     0.0000     0.000     0.000     0.000  1.0000  0.0000  0.0000
     2 C(13)  Bbb     0.0000     0.000     0.000     0.000  0.0000  1.0000  0.0000
              Bcc     0.0000     0.000     0.000     0.000  0.0000  0.0000  1.0000
 
              Baa     0.0000     0.000     0.000     0.000  1.0000  0.0000  0.0000
     3 O(17)  Bbb     0.0000     0.000     0.000     0.000  0.0000  1.0000  0.0000
              Bcc     0.0000     0.000     0.000     0.000  0.0000  0.0000  1.0000
 
              Baa     0.0000     0.000     0.000     0.000  1.0000  0.0000  0.0000
     4 N(14)  Bbb     0.0000     0.000     0.000     0.000  0.0000  1.0000  0.0000
              Bcc     0.0000     0.000     0.000     0.000  0.0000  0.0000  1.0000
 
              Baa     0.0000     0.000     0.000     0.000  1.0000  0.0000  0.0000
     5 H(1)   Bbb     0.0000     0.000     0.000     0.000  0.0000  1.0000  0.0000
              Bcc     0.0000     0.000     0.000     0.000  0.0000  0.0000  1.0000
 
              Baa     0.0000     0.000     0.000     0.000  1.0000  0.0000  0.0000
     6 H(1)   Bbb     0.0000     0.000     0.000     0.000  0.0000  1.0000  0.0000
              Bcc     0.0000     0.000     0.000     0.000  0.0000  0.0000  1.0000
 
              Baa     0.0000     0.000     0.000     0.000  1.0000  0.0000  0.0000
     7 H(1)   Bbb     0.0000     0.000     0.000     0.000  0.0000  1.0000  0.0000
              Bcc     0.0000     0.000     0.000     0.000  0.0000  0.0000  1.0000
 
              Baa     0.0000     0.000     0.000     0.000  1.0000  0.0000  0.0000
     8 H(1)   Bbb     0.0000     0.000     0.000     0.000  0.0000  1.0000  0.0000
              Bcc     0.0000     0.000     0.000     0.000  0.0000  0.0000  1.0000
 

 ---------------------------------------------------------------------------------

 No NMR shielding tensors so no spin-rotation constants.
 Leave Link  601 at Tue May  2 09:24:48 2023, MaxMem=   33554432 cpu:       2.4
 (Enter /local/share/g09/l607.exe)
 Leave Link  607 at Tue May  2 09:24:50 2023, MaxMem=   33554432 cpu:       1.2
 (Enter /local/share/g09/linda-exe/l701.exel)
 Compute integral first derivatives.
 ... and contract with generalized density number  0.
 D1PCM: PCM CHGder 1st derivatives, ID1Alg=3 FixD1E=F DoIter=F DoCFld=F I1PDM=0.
 GePol: Maximum number of non-zero 1st derivatives   =     254
 Leave Link  701 at Tue May  2 09:24:59 2023, MaxMem=   33554432 cpu:       8.1
 (Enter /local/share/g09/l702.exe)
 L702 exits ... SP integral derivatives will be done elsewhere.
 Leave Link  702 at Tue May  2 09:24:59 2023, MaxMem=   33554432 cpu:       0.2
 (Enter /local/share/g09/linda-exe/l703.exel)
 Compute integral first derivatives, UseDBF=F ICtDFT=           0.
 Integral derivatives from FoFDir, PRISM(SPDF).
 Calling FoFJK, ICntrl=      2527 FMM=F ISym2X=0 I1Cent= 0 IOpClX= 0 NMat=1 NMatS=1 NMatT=0.
 FoFCou: FMM=F IPFlag=           0 FMFlag=      100000 FMFlg1=         800
         NFxFlg=           0 DoJE=F BraDBF=F KetDBF=F FulRan=T
         Omega=  0.000000  0.000000  1.000000  0.000000  0.000000 ICntrl=    2527 IOpCl=  0
         NMat0=    1 NMatS0=    1 NMatT0=    0 NMatD0=    1 NMtDS0=    0 NMtDT0=    0
         I1Cent=           0 NGrid=           0.
 Symmetry not used in FoFCou.
 Leave Link  703 at Tue May  2 09:25:04 2023, MaxMem=   33554432 cpu:       4.0
 (Enter /local/share/g09/l716.exe)
 Dipole        =-1.73825613D+00-2.95813418D+00 8.60678656D-05
 ***** Axes restored to original set *****
 -------------------------------------------------------------------
 Center     Atomic                   Forces (Hartrees/Bohr)
 Number     Number              X              Y              Z
 -------------------------------------------------------------------
      1        6           0.020583653   -0.000006520    0.006309705
      2        6          -0.140627378    0.000023958    0.022033340
      3        8           0.019372790   -0.000003634    0.021706551
      4        7           0.077920056   -0.000010614   -0.030912298
      5        1           0.001871426   -0.000001054    0.007581505
      6        1           0.001940382    0.001621611   -0.005817454
      7        1           0.001937672   -0.001621899   -0.005816171
      8        1           0.017001399   -0.000001848   -0.015085177
 -------------------------------------------------------------------
 Cartesian Forces:  Max     0.140627378 RMS     0.034914571
 Leave Link  716 at Tue May  2 09:25:04 2023, MaxMem=   33554432 cpu:       0.2
 (Enter /local/share/g09/l103.exe)

 GradGradGradGradGradGradGradGradGradGradGradGradGradGradGradGradGradGrad
 Berny optimization.
 Internal  Forces:  Max     0.082677306 RMS     0.020520528
 Search for a local minimum.
 Step number   1 out of a maximum of   35 on scan point     1 out of    19
[truncated: 3,088,160 more chars]
